# Supplementary material for: Estrogen exacerbates mammary involution through neutrophil-dependent and -independent mechanism
Source: eLife journal article supplement (doi:10.7554/elife.57274), 2020-07-24
Supplement: supp [file elife-57274-supp-v1.zip]

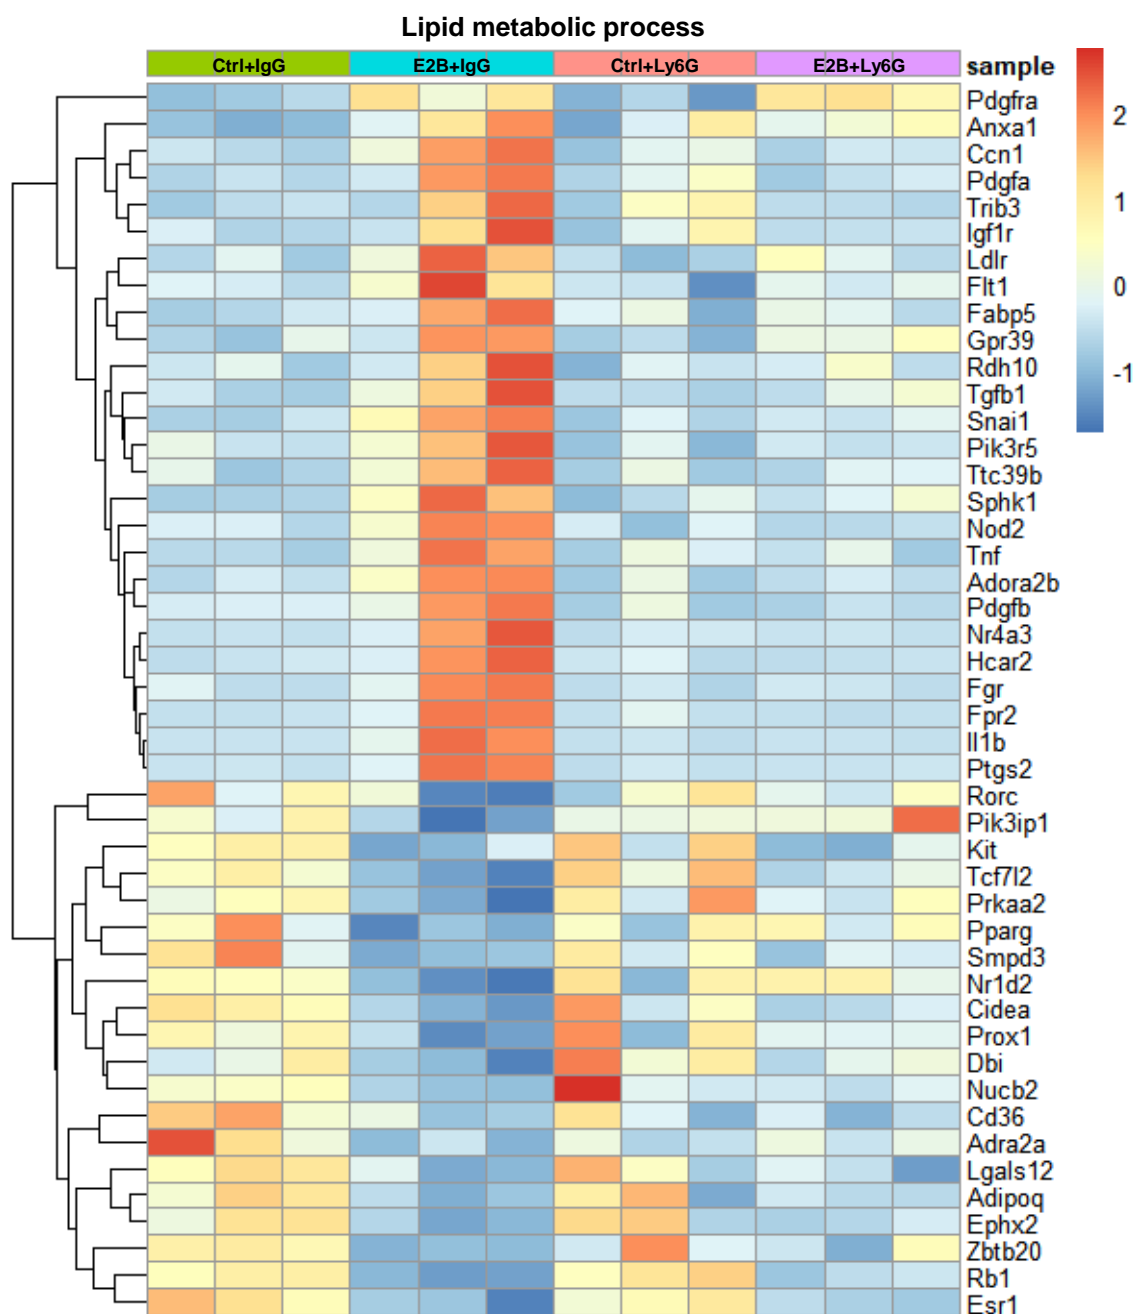

**Figure 4 – Figure Supplement 3. Estrogen regulation of lipid metabolism during post-weaning mammary involution were attenuated with neutrophil depletion.** Mice at INV D1 was treated with anti-Ly6G antibody (Ly6G) or isotype control (IgG). 24h later, they were treated with vehicle control (Ctrl) or E2B for 24h. Heatmap representation of genes associated to lipid metabolic process identified from the GO over-representation analysis ( $\geq 1.5$  and  $\leq -1.5$ -fold) with  $\text{padj} < 0.05$  from the DESeq2 analysed RNA-Seq data; Ctrl+IgG n=3, Ctrl+Ly6G n=3, E2B+IgG n=3, E2B+Ly6G n=3.
