# Supplementary material for: Estrogen exacerbates mammary involution through neutrophil-dependent and -independent mechanism
Source: eLife journal article supplement (doi:10.7554/elife.57274), 2020-07-24
Supplement: supp [file elife-57274-supp-v1.zip]

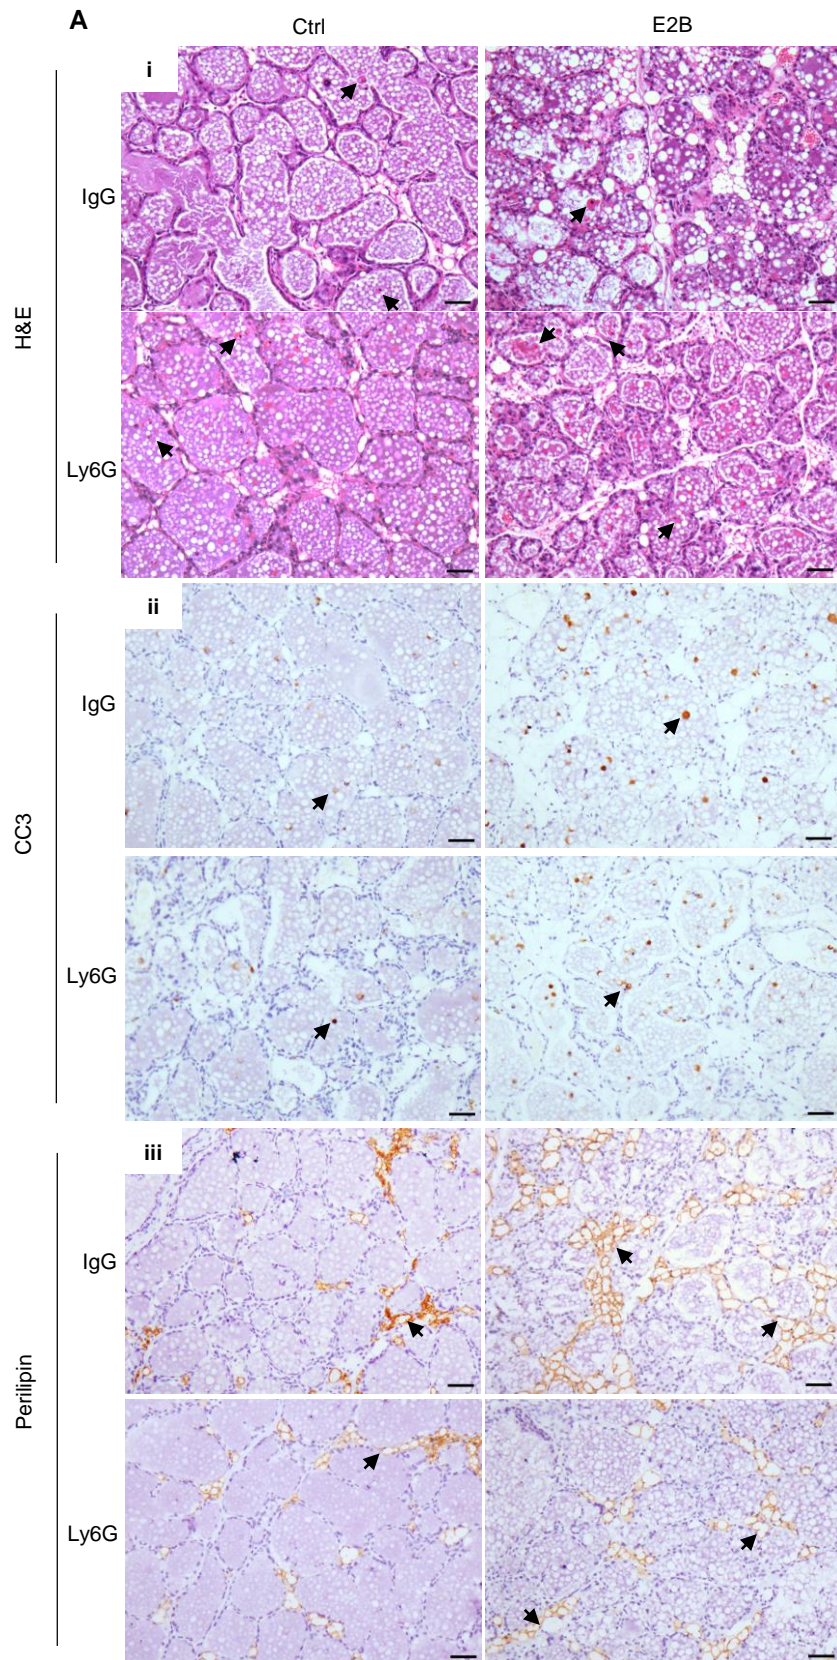

**Figure 1 – Figure Supplement 1. Effect of neutrophil depletion on estrogen-induced cell death and adipocytes repopulation.** Mice at INV D1 were administered with isotype control (IgG) or anti-neutrophil antibody (Ly6G) and treated with Ctrl or E2B for 48h. A, Neutrophil depletion attenuates E2B-induced adipocyte repopulation but did not affect the E2B-stimulated cell death in involuting mammary gland; (i) H&E stained mammary tissue sections; shed cells with hyper-condensed nuclei are indicated by arrows. (ii) IHC of cleaved caspase-3 (CC3); arrows indicate CC3<sup>+</sup> cells. (iii) Perilipin IHC; arrows indicate perilipin<sup>+</sup> adipocytes. Scale bars: 50µm.
