# Supplementary material for: Estrogen exacerbates mammary involution through neutrophil-dependent and -independent mechanism
Source: eLife journal article supplement (doi:10.7554/elife.57274), 2020-07-24
Supplement: supp [file elife-57274-supp-v1.zip]

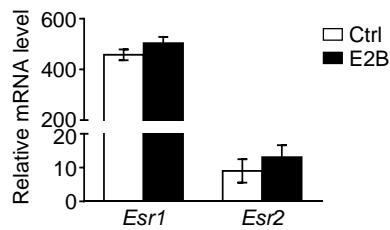

**Figure 8 – Figure Supplement 1. Expression of *Esr1* (ER $\alpha$ ) is about 40 times higher than *Esr2* (ER $\beta$ ) in mammary neutrophils during mammary involution.** Mice at INV D2 was treated with either vehicle control (Ctrl) or E2B for 8h. Mammary neutrophils were isolated from tissue using Dynabeads® bound anti-Ly6G antibody. Gene expression of *Esr1* and *Esr2* relative to *Rplp0* were analysed in Ly6G<sup>+</sup> population by qPCR analysis (Ctrl n=4, E2B n=4). Data represented as mean  $\pm$  SEM.
