# Supplementary material for: Estrogen exacerbates mammary involution through neutrophil-dependent and -independent mechanism
Source: eLife journal article supplement (doi:10.7554/elife.57274), 2020-07-24
Supplement: supp [file elife-57274-supp-v1.zip]

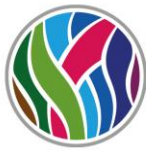

## eLife's transparent reporting form

We encourage authors to provide detailed information *within their submission* to facilitate the interpretation and replication of experiments. Authors can upload supporting documentation to indicate the use of appropriate reporting guidelines for health-related research (see [EQUATOR Network](#)), life science research (see the [BioSharing Information Resource](#)), or the [ARRIVE guidelines](#) for reporting work involving animal research. Where applicable, authors should refer to any relevant reporting standards documents in this form.

If you have any questions, please consult our Journal Policies and/or contact us: [editorial@elifesciences.org](mailto:editorial@elifesciences.org).

### Sample-size estimation

- You should state whether an appropriate sample size was computed when the study was being designed
- You should state the statistical method of sample size computation and any required assumptions
- If no explicit power analysis was used, you should describe how you decided what sample (replicate) size (number) to use

Please outline where this information can be found within the submission (e.g., sections or figure legends), or explain why this information doesn't apply to your submission:

We did not perform any statistical method of sample size computation. However, based on the resource equation approach [1, 2] to calculate sample size per treatment group, when the number of treatment group is 4, the sample size is 3.5, while when the number of treatment group is 2, the sample size is 6.

### Replicates

- You should report how often each experiment was performed
- You should include a definition of biological versus technical replication
- The data obtained should be provided and sufficient information should be provided to indicate the number of independent biological and/or technical replicates
- If you encountered any outliers, you should describe how these were handled
- Criteria for exclusion/inclusion of data should be clearly stated
- High-throughput sequence data should be uploaded before submission, with a private link for reviewers provided (these are available from both GEO and ArrayExpress)

Please outline where this information can be found within the submission (e.g., sections or figure legends), or explain why this information doesn't apply to your submission:

The number of biological replicates and technical replicates were listed in the figure legend of the respective experimental data. Biological replicates refer to the number of Balb/c mice used for the experiment. While technical replicates refer to the number of repetitions performed in the *in vitro* experiments with MCF7-caspase3(+) cell line. When an outlier is encountered, Grubbs' test was performed to determine the inclusion or exclusion of the outlier. Outlier was removed from Fig. 3Ci, 3D, and Suppl. Fig. 3.

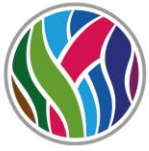

### Statistical reporting

- Statistical analysis methods should be described and justified
- Raw data should be presented in figures whenever informative to do so (typically when N per group is less than 10)
- For each experiment, you should identify the statistical tests used, exact values of N, definitions of center, methods of multiple test correction, and dispersion and precision measures (e.g., mean, median, SD, SEM, confidence intervals; and, for the major substantive results, a measure of effect size (e.g., Pearson's r, Cohen's d)
- Report exact p-values wherever possible alongside the summary statistics and 95% confidence intervals. These should be reported for all key questions and not only when the p-value is less than 0.05.

Please outline where this information can be found within the submission (e.g., sections or figure legends), or explain why this information doesn't apply to your submission:

Statistical analysis methods used was described in material and method section under the sub-heading "Statistical analysis". The exact values of N for each experiment was listed in the respective figure legend. The exact p-values were listed in the result section whenever the relevant data was described.

(For large datasets, or papers with a very large number of statistical tests, you may upload a single table file with tests, Ns, etc., with reference to sections in the manuscript.)

### Group allocation

- Indicate how samples were allocated into experimental groups (in the case of clinical studies, please specify allocation to treatment method); if randomization was used, please also state if restricted randomization was applied
- Indicate if masking was used during group allocation, data collection and/or data analysis

Please outline where this information can be found within the submission (e.g., sections or figure legends), or explain why this information doesn't apply to your submission:

Animals were distributed randomly into the different treatment groups as mentioned in the material and method section under the sub-heading "Animal studies"

### Additional data files ("source data")

- We encourage you to upload relevant additional data files, such as numerical data that are represented as a graph in a figure, or as a summary table
- Where provided, these should be in the most useful format, and they can be uploaded as "Source data" files linked to a main figure or table
- Include model definition files including the full list of parameters used
- Include code used for data analysis (e.g., R, MatLab)
- Avoid stating that data files are "available upon request"

Please indicate the figures or tables for which source data files have been provided:

Source data files for Fig. 2 has been provided. These include the DESeq2 and GO over-representation analysis result.

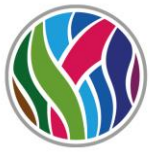

1. Charan J, Kantharia ND: **How to calculate sample size in animal studies?** *J Pharmacol Pharmacother* 2013, **4**(4):303-306.
2. Arifin WN, Zahiruddin WM: **Sample Size Calculation in Animal Studies Using Resource Equation Approach.** *Malays J Med Sci* 2017, **24**(5):101-105.
