# Supplementary material for: Estrogen exacerbates mammary involution through neutrophil-dependent and -independent mechanism
Source: eLife journal article supplement (doi:10.7554/elife.57274), 2020-07-24
Supplement: supp [file elife-57274-supp-v1.zip]

Archive with 20 entries (20 files):
- elife_poa_e57274_Figure_2_source_data_1.xlsx
- elife_poa_e57274_Figure_2_source_data_2.xlsx
- elife_poa_e57274_Figure_2_source_data_3.xlsx
- elife_poa_e57274_Figure_2_source_data_4.xlsx
- elife_poa_e57274_Figure_2_source_data_5.xlsx
- elife_poa_e57274_Figure_2_source_data_6.xlsx
- elife_poa_e57274_Figure_2_source_data_7.xlsx
- elife_poa_e57274_Transparent_Reporting_File.pdf
- elife_poa_e57274_Supplementary_file_1.xlsx
- elife_poa_e57274_Supplementary_file_2.xlsx
- elife_poa_e57274_Figure_1_figure_supplement_1.pdf
- elife_poa_e57274_Figure_2_figure_supplement_1.pdf
- elife_poa_e57274_Figure_3_figure_supplement_1.pdf
- elife_poa_e57274_Figure_3_figure_supplement_2.pdf
- elife_poa_e57274_Figure_4_figure_supplement_1.pdf
- elife_poa_e57274_Figure_4_figure_supplement_2.pdf
- elife_poa_e57274_Figure_4_figure_supplement_3.pdf
- elife_poa_e57274_Figure_5_figure_supplement_1.pdf
- elife_poa_e57274_Figure_5_figure_supplement_2.pdf
- elife_poa_e57274_Figure_8_figure_supplement_1.pdf
