# Supplementary material for: Estrogen exacerbates mammary involution through neutrophil-dependent and -independent mechanism
Source: eLife journal article supplement (doi:10.7554/elife.57274), 2020-07-24
Supplement: supp [file elife-57274-supp-v1.zip › elife_poa_e57274_Figure_2_source_data_1.xlsx]

## Sheet: groupB_Vs_groupA
	baseMean	log2FoldChange	lfcSE	stat	pvalue	padj
MGP_BALBcJ_G0030998__Plxna1	4605.28	-0.431154	0.0898204	-4.80017	1.58528e-06	0.0319497
MGP_BALBcJ_G0000058__NA	7.98032	-6.21194	1.43871	-4.31771	1.57654e-05	0.158868
MGP_BALBcJ_G0000009__Ighd	102.124	-4.79159	1.26061	-3.80099	0.000144118	0.223427
MGP_BALBcJ_G0000117__Igkv10-96	2072.27	-1.00807	0.253158	-3.98198	6.83434e-05	0.223427
MGP_BALBcJ_G0000124__Igkv12-89	23.9833	3.40867	0.825264	4.1304	3.62134e-05	0.223427
MGP_BALBcJ_G0017810__NA	5937.35	0.199618	0.0514422	3.88042	0.000104276	0.223427
MGP_BALBcJ_G0018880__Stxbp4	206.131	-0.682797	0.169334	-4.03226	5.52432e-05	0.223427
MGP_BALBcJ_G0019524__Ldah	729.391	-0.383821	0.100738	-3.81008	0.00013892	0.223427
MGP_BALBcJ_G0023532__H2-Ob	58.7356	-3.18905	0.83846	-3.80346	0.000142689	0.223427
MGP_BALBcJ_G0025019__Pten	3002.51	-0.247873	0.0635587	-3.89992	9.6226e-05	0.223427
MGP_BALBcJ_G0025235__Plekhs1	1409.12	1.44079	0.362522	3.97435	7.05711e-05	0.223427
MGP_BALBcJ_G0026715__Edem2	2643.47	-0.381593	0.0999635	-3.81733	0.000134905	0.223427
MGP_BALBcJ_G0030514__Ahcyl2	3716.96	-0.606995	0.156106	-3.88835	0.000100927	0.223427
MGP_BALBcJ_G0020860__Cwc27	474.434	0.438822	0.11626	3.7745	0.000160331	0.230807
MGP_BALBcJ_G0021368__Gjb6	26.0792	1.42244	0.380433	3.73901	0.000184749	0.236528
MGP_BALBcJ_G0032202__Cd37	221.77	-1.89219	0.506622	-3.73492	0.000187776	0.236528
MGP_BALBcJ_G0020618__Fbp2	235.888	0.79256	0.214605	3.69312	0.000221523	0.248032
MGP_BALBcJ_G0023522__H2-Oa	14.3784	-4.22436	1.13983	-3.70614	0.000210444	0.248032
MGP_BALBcJ_G0033347__Atp11a	9791.99	-0.467711	0.127351	-3.67261	0.000240088	0.25467
MGP_BALBcJ_G0030400__Rfc3	182.166	0.603609	0.166245	3.63084	0.000282505	0.28468
MGP_BALBcJ_G0035483__Clcn5	995.808	-0.449225	0.12447	-3.6091	0.000307255	0.294877
MGP_BALBcJ_G0020506__Diras2	24.8206	-1.66234	0.46793	-3.55254	0.00038153	0.349516
MGP_BALBcJ_G0019401__Tha1	183.064	0.583559	0.16568	3.5222	0.000427974	0.360402
MGP_BALBcJ_G0033713__Rpl18a	8502.49	0.195681	0.0555682	3.52146	0.000429177	0.360402
MGP_BALBcJ_G0000067__Ighv3-8	315.567	-2.43279	0.705632	-3.44768	0.000565419	0.384634
MGP_BALBcJ_G0015870__NA	10.7598	-2.44343	0.712295	-3.43036	0.000602774	0.384634
MGP_BALBcJ_G0016570__Ralgps2	117.155	-1.33287	0.38585	-3.45438	0.000551554	0.384634
MGP_BALBcJ_G0017558__Stab2	18.3698	-2.94996	0.8622	-3.42143	0.000622922	0.384634
MGP_BALBcJ_G0025292__Mcm10	54.8876	0.873121	0.25487	3.42575	0.000613095	0.384634
MGP_BALBcJ_G0029935__Mlec	8044.65	-0.533311	0.152835	-3.48945	0.000484007	0.384634
MGP_BALBcJ_G0034849__Cyp1a1	32.4082	3.65347	1.05703	3.45636	0.000547522	0.384634
MGP_BALBcJ_G0035312__Spink8	92.9693	-1.57088	0.451482	-3.47939	0.000502565	0.384634
MGP_BALBcJ_G0036093__Tbc1d8b	736.756	-0.279336	0.0817142	-3.41845	0.000629797	0.384634
MGP_BALBcJ_G0018557__Rabep1	1013.43	-0.521421	0.153184	-3.40389	0.000664327	0.384943
MGP_BALBcJ_G0023028__Clic6	999.67	-1.12403	0.330385	-3.40218	0.000668502	0.384943
MGP_BALBcJ_G0001725__NA	51.6597	1.25349	0.380742	3.29223	0.00099397	0.412532
MGP_BALBcJ_G0015346__6530402F18Rik	46.4834	-1.0536	0.315646	-3.33792	0.000844077	0.412532
MGP_BALBcJ_G0015856__Uggt1	6713	-0.384829	0.116506	-3.30308	0.000956297	0.412532
MGP_BALBcJ_G0016897__Traf3ip3	83.6689	-1.97763	0.602735	-3.2811	0.00103403	0.412532
MGP_BALBcJ_G0017572__Spic	23.5327	-2.12657	0.658709	-3.22838	0.00124491	0.412532
MGP_BALBcJ_G0017920__Gatsl3	73.9152	-0.878712	0.271163	-3.24053	0.00119308	0.412532
MGP_BALBcJ_G0018131__Cyfip2	166.851	-1.37621	0.416742	-3.3023	0.000958945	0.412532
MGP_BALBcJ_G0018945__Hoxb6	49.4036	-0.906277	0.283208	-3.20004	0.00137407	0.412532
MGP_BALBcJ_G0020089__Aspg	132.288	0.991104	0.301158	3.29098	0.000998384	0.412532
MGP_BALBcJ_G0021075__Sema3g	528.615	-0.322476	0.0992889	-3.24785	0.00116279	0.412532
MGP_BALBcJ_G0021425__Blk	15.0462	-4.1038	1.28466	-3.19445	0.00140098	0.412532
MGP_BALBcJ_G0023440__Dnah8	81.7546	-1.76033	0.551098	-3.19422	0.00140207	0.412532
MGP_BALBcJ_G0023893__Ranbp3	1631.31	0.23209	0.0726291	3.19555	0.00139567	0.412532
MGP_BALBcJ_G0024004__Cebpzos	245.917	0.518123	0.157104	3.29797	0.000973878	0.412532
MGP_BALBcJ_G0024121__Lama3	1099.54	-0.66451	0.199524	-3.33047	0.000866996	0.412532
MGP_BALBcJ_G0024528__Rpl17	6484.25	0.188395	0.057918	3.25279	0.00114279	0.412532
MGP_BALBcJ_G0025807__NA	367.148	0.485039	0.147491	3.28859	0.00100691	0.412532
MGP_BALBcJ_G0026767__Lbp	51297.2	-0.455661	0.141149	-3.22822	0.00124564	0.412532
MGP_BALBcJ_G0027335__Fcrl1	34.7011	-2.77808	0.831069	-3.34278	0.000829429	0.412532
MGP_BALBcJ_G0027617__Pde4dip	1407.25	-0.263093	0.0822468	-3.19883	0.00137987	0.412532
MGP_BALBcJ_G0027868__NA	653.479	-0.436977	0.135829	-3.21711	0.0012949	0.412532
MGP_BALBcJ_G0028727__Mycbp	307.986	0.53481	0.167976	3.18385	0.0014533	0.412532
MGP_BALBcJ_G0029418__Slc5a1	1003.73	0.71945	0.224009	3.21171	0.0013195	0.412532
MGP_BALBcJ_G0029622__Exoc1	1120.05	0.25874	0.0809651	3.1957	0.00139491	0.412532
MGP_BALBcJ_G0030965__Gfpt1	2994.53	-0.463926	0.143464	-3.23375	0.00122177	0.412532
MGP_BALBcJ_G0031067__Gxylt2	98.8366	-1.04476	0.32747	-3.19039	0.00142082	0.412532
MGP_BALBcJ_G0031488__Caprin2	364.46	0.457513	0.137997	3.31537	0.000915204	0.412532
MGP_BALBcJ_G0031997__Syne4	1559.28	0.593921	0.179918	3.30107	0.000963161	0.412532
MGP_BALBcJ_G0032259__Saa3	833.555	1.25998	0.395403	3.18658	0.00143966	0.412532
MGP_BALBcJ_G0032831__St5	2307.8	-0.503832	0.150742	-3.34234	0.00083075	0.412532
MGP_BALBcJ_G0033637__Psd3	1094.65	-0.373887	0.116278	-3.21545	0.00130238	0.412532
MGP_BALBcJ_G0033807__Clgn	7.8352	-2.25159	0.697564	-3.2278	0.00124748	0.412532
MGP_BALBcJ_G0035233__Hyal1	172.155	-0.642403	0.201406	-3.18959	0.00142474	0.412532
MGP_BALBcJ_G0035291__Col7a1	530.046	-0.654394	0.204816	-3.19504	0.00139811	0.412532
MGP_BALBcJ_G0035515__Rbm3	3403.49	0.502127	0.149137	3.36688	0.000760249	0.412532
MGP_BALBcJ_G0040124__NA	35.1295	-1.02946	0.312535	-3.29391	0.000988049	0.412532
MGP_BALBcJ_G0016678__Fcrla	20.0554	-2.61002	0.826679	-3.15724	0.0015927	0.429314
MGP_BALBcJ_G0018256__Fnip1	1823.25	-0.316203	0.100322	-3.15187	0.00162228	0.429314
MGP_BALBcJ_G0024674__Fibp	1003.32	0.467619	0.147826	3.16332	0.00155982	0.429314
MGP_BALBcJ_G0026780__Top1	3351.62	-0.400757	0.127279	-3.14866	0.00164023	0.429314
MGP_BALBcJ_G0032561__Fam168a	1080.08	-0.285382	0.0905259	-3.15249	0.00161883	0.429314
MGP_BALBcJ_G0035677__Stk26	81.6242	-0.759237	0.24064	-3.15507	0.00160459	0.429314
MGP_BALBcJ_G0018357__Gid4	1499.74	-0.257763	0.0820779	-3.14047	0.0016868	0.433703
MGP_BALBcJ_G0025195__Calhm2	89.4477	-0.711135	0.226608	-3.13817	0.00170004	0.433703
MGP_BALBcJ_G0022920__Robo1	105.156	-0.833635	0.266649	-3.12633	0.00177	0.437592
MGP_BALBcJ_G0024433__Rps14	4783.61	0.217913	0.0698207	3.12104	0.00180213	0.437592
MGP_BALBcJ_G0033482__Eif4ebp1	1201.23	0.491402	0.157304	3.1239	0.00178474	0.437592
MGP_BALBcJ_G0035983__Gpr174	14.1632	-2.94857	0.944499	-3.12183	0.0017973	0.437592
MGP_BALBcJ_G0000080__Ighv1-9	259.47	-1.33957	0.430901	-3.10876	0.00187877	0.440287
MGP_BALBcJ_G0021478__Stc1	151.29	0.78234	0.251489	3.11083	0.00186562	0.440287
MGP_BALBcJ_G0023578__Ly6g6c	19.782	2.56421	0.823131	3.1152	0.00183823	0.440287
MGP_BALBcJ_G0000877__NA	11.5448	-2.98876	0.976145	-3.0618	0.00220009	0.454706
MGP_BALBcJ_G0007494__NA	217.832	0.768772	0.251805	3.05304	0.00226537	0.454706
MGP_BALBcJ_G0020719__Zfp72	105.038	-0.549129	0.179474	-3.05966	0.00221592	0.454706
MGP_BALBcJ_G0021067__Glt8d1	567.035	-0.330161	0.106912	-3.08817	0.00201392	0.454706
MGP_BALBcJ_G0022175__Pim3	1142.69	0.388535	0.126845	3.06308	0.00219073	0.454706
MGP_BALBcJ_G0024967__Fam189a2	1917.26	-0.358866	0.116364	-3.08399	0.00204246	0.454706
MGP_BALBcJ_G0026537__Slx4ip	182.903	-0.505257	0.164782	-3.0662	0.00216796	0.454706
MGP_BALBcJ_G0027886__Ddit4l	78.9442	-0.771555	0.251492	-3.06791	0.00215564	0.454706
MGP_BALBcJ_G0028876__Fam46b	78.2752	1.31377	0.424436	3.09533	0.00196597	0.454706
MGP_BALBcJ_G0029034__Fblim1	2409.85	0.332409	0.108048	3.0765	0.00209444	0.454706
MGP_BALBcJ_G0030494__Snd1	5880.25	-0.270262	0.0880648	-3.0689	0.00214848	0.454706
MGP_BALBcJ_G0030737__Tril	225.148	-0.726568	0.237783	-3.05559	0.00224615	0.454706
MGP_BALBcJ_G0031034__Fgd5	391.146	-0.472278	0.153892	-3.06889	0.00214855	0.454706
MGP_BALBcJ_G0032877__Plekha7	772.785	0.411914	0.134787	3.05603	0.00224292	0.454706
MGP_BALBcJ_G0033931__Mt2	4857.14	0.908917	0.297881	3.05127	0.00227872	0.454706
MGP_BALBcJ_G0016231__Ackr3	1644.44	0.44677	0.146729	3.04487	0.00232782	0.459949
MGP_BALBcJ_G0019740__Map4k5	1173.55	0.283204	0.0931407	3.0406	0.00236104	0.461985
MGP_BALBcJ_G0021854__Fam84b	3201	-0.465192	0.153149	-3.03751	0.00238545	0.462273
MGP_BALBcJ_G0030362__Rasl11a	55.8362	-0.751559	0.248078	-3.02952	0.00244939	0.470143
MGP_BALBcJ_G0019025__Ccr7	20.8646	-3.50313	1.15934	-3.02165	0.00251399	0.470549
MGP_BALBcJ_G0028827__Tinagl1	1934.93	-0.373527	0.123558	-3.02308	0.00250213	0.470549
MGP_BALBcJ_G0031118__Atp2b2	75.3113	1.27646	0.422563	3.02074	0.00252155	0.470549
MGP_BALBcJ_G0000066__Ighv9-4	39.8666	-1.80882	0.608464	-2.97276	0.00295133	0.475294
MGP_BALBcJ_G0003718__Gm16206	39.8546	1.36079	0.458822	2.96583	0.00301864	0.475294
MGP_BALBcJ_G0017418__Hmha1	788.805	-1.11646	0.373954	-2.98555	0.0028307	0.475294
MGP_BALBcJ_G0017426__Cirbp	1189.97	0.785473	0.263268	2.98355	0.00284927	0.475294
MGP_BALBcJ_G0018231__Uqcrq	1350.17	0.282461	0.0938844	3.00861	0.00262449	0.475294
MGP_BALBcJ_G0018948__Hoxb3	131.336	-0.610741	0.205001	-2.97921	0.00288989	0.475294
MGP_BALBcJ_G0021105__Wdfy4	309.071	-1.22016	0.407645	-2.99319	0.00276077	0.475294
MGP_BALBcJ_G0024163__Ino80c	562.177	0.380841	0.127263	2.99256	0.00276651	0.475294
MGP_BALBcJ_G0024185__Sft2d3	121.299	0.554256	0.185658	2.98536	0.00283245	0.475294
MGP_BALBcJ_G0027291__Fam198b	326.155	-0.497803	0.165758	-3.0032	0.0026716	0.475294
MGP_BALBcJ_G0027789__Frrs1	2160.97	-0.376984	0.126824	-2.9725	0.00295387	0.475294
MGP_BALBcJ_G0027938__Mcoln3	6.11961	-3.86181	1.29942	-2.97195	0.00295913	0.475294
MGP_BALBcJ_G0028178__Atp8b5	7.39707	2.67413	0.891341	3.00013	0.00269868	0.475294
MGP_BALBcJ_G0028810__Lck	62.0333	-2.24395	0.74792	-3.00025	0.00269758	0.475294
MGP_BALBcJ_G0029726__Cxcl10	36.618	-1.83418	0.617805	-2.96887	0.00298899	0.475294
MGP_BALBcJ_G0031433__Pde3a	109.9	-0.653361	0.220166	-2.96759	0.00300148	0.475294
MGP_BALBcJ_G0031925__Rps16	5399.77	0.252866	0.0843325	2.99844	0.00271364	0.475294
MGP_BALBcJ_G0032750__Tpp1	4389.63	-0.268238	0.0899534	-2.98197	0.00286399	0.475294
MGP_BALBcJ_G0033620__Cpe	825.807	-0.494329	0.166646	-2.96634	0.00301364	0.475294
MGP_BALBcJ_G0036175__Acot9	1173.01	0.469907	0.156148	3.00937	0.00261794	0.475294
MGP_BALBcJ_G0017337__Sumo3	1714.96	0.29594	0.100444	2.94631	0.00321585	0.476561
MGP_BALBcJ_G0018502__Tnk1	2026.92	0.352515	0.119067	2.96063	0.00307007	0.476561
MGP_BALBcJ_G0021617__Cldn10	82.277	2.66371	0.903278	2.94893	0.00318871	0.476561
MGP_BALBcJ_G0024620__Tbc1d10c	57.2866	-1.8882	0.640779	-2.94673	0.00321158	0.476561
MGP_BALBcJ_G0025472__Rpl7a	9543.41	0.164688	0.055832	2.94971	0.00318075	0.476561
MGP_BALBcJ_G0026774__Ppp1r16b	154.585	-0.994481	0.337277	-2.94855	0.00319264	0.476561
MGP_BALBcJ_G0029133__Car6	535.835	0.612906	0.207821	2.9492	0.00318594	0.476561
MGP_BALBcJ_G0031895__Blvrb	672.222	0.516865	0.17493	2.95469	0.00312979	0.476561
MGP_BALBcJ_G0003976__Gm13091	22.0449	-1.33875	0.454999	-2.9423	0.00325783	0.479257
MGP_BALBcJ_G0027836__Tifa	198.166	-0.706832	0.24061	-2.93767	0.00330689	0.479476
MGP_BALBcJ_G0028054__Atp6v0d2	23.6378	-2.31437	0.787445	-2.93908	0.00329186	0.479476
MGP_BALBcJ_G0031811__Kcnn4	809.354	0.483218	0.164642	2.93496	0.00333591	0.480228
MGP_BALBcJ_G0022599__B3gnt5	31.7137	-3.17576	1.08557	-2.92542	0.00343995	0.48145
MGP_BALBcJ_G0023241__Prss32	2.08606	4.59821	1.5688	2.93104	0.00337832	0.48145
MGP_BALBcJ_G0030188__Fis1	1268.29	0.23145	0.0790948	2.92623	0.00343096	0.48145
MGP_BALBcJ_G0031875__Cyp2b19	130.58	1.59408	0.544795	2.92601	0.00343335	0.48145
MGP_BALBcJ_G0007165__NA	13.5879	-3.45643	1.18327	-2.9211	0.003488	0.484808
MGP_BALBcJ_G0016655__Mgst3	911.964	0.346624	0.118957	2.91386	0.00356994	0.486139
MGP_BALBcJ_G0032782__Syt9	267.022	-0.411296	0.140965	-2.91772	0.00352598	0.486139
MGP_BALBcJ_G0033804__Ucp1	29.2258	3.34228	1.14625	2.91584	0.00354729	0.486139
MGP_BALBcJ_G0017302__Gstt1	409.777	0.661141	0.227372	2.90775	0.00364038	0.48886
MGP_BALBcJ_G0018924__Spop	3659.76	-0.163058	0.056114	-2.90584	0.00366269	0.48886
MGP_BALBcJ_G0028085__Rragd	688.382	-0.703365	0.241909	-2.90756	0.00364256	0.48886
MGP_BALBcJ_G0033154__Cd163l1	8.42737	-4.06905	1.40182	-2.9027	0.00369964	0.490543
MGP_BALBcJ_G0034043__Lcat	11.5146	-2.00139	0.690696	-2.89764	0.00375985	0.495268
MGP_BALBcJ_G0016645__Ildr2	45.5785	-1.1071	0.382559	-2.89392	0.00380463	0.496522
MGP_BALBcJ_G0028642__Ipo13	785.317	-0.379641	0.131238	-2.89277	0.00381864	0.496522
MGP_BALBcJ_G0002266__NA	30.6273	1.13939	0.394408	2.88885	0.00386658	0.497495
MGP_BALBcJ_G0032529__Uvrag	688.192	-0.290072	0.100436	-2.88812	0.00387549	0.497495
MGP_BALBcJ_G0036900__Gm15742	2.65557	-4.62548	1.60267	-2.88611	0.00390038	0.497521
MGP_BALBcJ_G0029963__Rfc5	168.561	0.472737	0.163921	2.88393	0.00392744	0.497821
MGP_BALBcJ_G0021968__Slc39a4	725.353	1.11852	0.388593	2.87838	0.00399728	0.50038
MGP_BALBcJ_G0034696__Cd3g	25.6517	-2.31872	0.805116	-2.87999	0.00397691	0.50038
MGP_BALBcJ_G0022514__Snai2	209.22	-0.632682	0.220166	-2.87366	0.00405744	0.504776
MGP_BALBcJ_G0032149__Shank1	29.9645	-1.73761	0.605108	-2.87157	0.00408437	0.505008
MGP_BALBcJ_G0017541__Mterf2	32.9289	1.02969	0.358851	2.86939	0.0041126	0.505399
MGP_BALBcJ_G0018989__Rpl19	7543.66	0.145004	0.0506619	2.86219	0.00420729	0.507746
MGP_BALBcJ_G0027436__Ints3	1284.43	-0.308597	0.10769	-2.86559	0.00416229	0.507746
MGP_BALBcJ_G0027646__Cd2	21.6592	-2.68344	0.937274	-2.86303	0.00419617	0.507746
MGP_BALBcJ_G0029761__Sec31a	3870.91	-0.210812	0.0737388	-2.85891	0.00425104	0.509974
MGP_BALBcJ_G0023593__Ltb	66.2365	-2.17763	0.762717	-2.8551	0.00430233	0.510318
MGP_BALBcJ_G0027918__Lmo4	657.205	0.401869	0.140763	2.85494	0.00430456	0.510318
MGP_BALBcJ_G0024466__Wdr7	1014.57	-0.30449	0.106814	-2.85066	0.00436286	0.514205
MGP_BALBcJ_G0002392__Trac	21.1895	-2.94485	1.03761	-2.8381	0.00453835	0.515811
MGP_BALBcJ_G0015579__Gm20536	8.07472	-2.26608	0.795729	-2.8478	0.00440226	0.515811
MGP_BALBcJ_G0017317__Dip2a	1091.85	0.350385	0.123197	2.8441	0.00445368	0.515811
MGP_BALBcJ_G0018837__Gdpd1	226.354	-0.888828	0.313312	-2.83688	0.00455564	0.515811
MGP_BALBcJ_G0025315__Prkcq	25.4229	-1.88372	0.663513	-2.83901	0.00452531	0.515811
MGP_BALBcJ_G0028073__Fut9	39.4728	-1.03151	0.362935	-2.84213	0.00448138	0.515811
MGP_BALBcJ_G0033693__Ssbp4	1154.28	0.305459	0.107671	2.83698	0.0045543	0.515811
MGP_BALBcJ_G0021083__Colq	8.85052	-3.81662	1.34627	-2.83495	0.00458325	0.516038
MGP_BALBcJ_G0015085__Gm11946	2.65869	4.33479	1.53233	2.82888	0.00467107	0.517257
MGP_BALBcJ_G0020909__Itga1	738.741	-0.466871	0.164837	-2.83231	0.00462129	0.517257
MGP_BALBcJ_G0031390__Crebl2	755.011	-0.325995	0.115236	-2.82893	0.00467045	0.517257
MGP_BALBcJ_G0000078__Ighv1-5	74.7152	1.60847	0.56924	2.82565	0.00471852	0.517671
MGP_BALBcJ_G0028986__Pla2g2d	68.7812	-1.59844	0.565793	-2.82513	0.00472618	0.517671
MGP_BALBcJ_G0022652__Rtp4	351.058	0.510232	0.180871	2.82097	0.00478789	0.521595
MGP_BALBcJ_G0021290__Bcl2l2	1396.09	-0.200678	0.0712364	-2.81708	0.0048463	0.52512
MGP_BALBcJ_G0020172__Ero1lb	283.268	-0.40717	0.145191	-2.80437	0.00504143	0.530643
MGP_BALBcJ_G0020445__Phactr1	328.54	0.521495	0.186016	2.80349	0.00505525	0.530643
MGP_BALBcJ_G0023098__Ccr6	43.9947	-1.71039	0.609551	-2.80599	0.00501625	0.530643
MGP_BALBcJ_G0025143__Sec31b	198.816	0.52129	0.185752	2.80638	0.00501012	0.530643
MGP_BALBcJ_G0030863__Tgoln1	14145.6	-0.452121	0.161193	-2.80484	0.00503415	0.530643
MGP_BALBcJ_G0032154__Josd2	1003.69	-0.225209	0.0801686	-2.80919	0.00496662	0.530643
MGP_BALBcJ_G0027237__Slc33a1	1020.97	-0.303273	0.108301	-2.80027	0.005106	0.533193
MGP_BALBcJ_G0007234__9030407P20Rik	63.8966	0.694819	0.248902	2.79154	0.0052458	0.542174
MGP_BALBcJ_G0030217__Irs3	62.587	-0.943799	0.338066	-2.79176	0.00524225	0.542174
MGP_BALBcJ_G0027869__Ppa2	665.915	0.43224	0.155065	2.78747	0.00531216	0.546231
MGP_BALBcJ_G0016204__Ngef	31.1383	1.32426	0.476784	2.77748	0.00547818	0.55065
MGP_BALBcJ_G0016654__Aldh9a1	2568.53	-0.348734	0.125792	-2.77231	0.00556598	0.55065
MGP_BALBcJ_G0020971__Rpl15	4229.61	0.199064	0.0717558	2.77418	0.00553407	0.55065
MGP_BALBcJ_G0022239__Amigo2	603.064	-0.548868	0.197802	-2.77484	0.00552291	0.55065
MGP_BALBcJ_G0023402__Tead3	1002.64	0.473167	0.170678	2.77228	0.00556647	0.55065
MGP_BALBcJ_G0023976__Lbh	488.707	-0.827831	0.298655	-2.77186	0.00557371	0.55065
MGP_BALBcJ_G0025024__Lipk	36.9368	-1.05549	0.380551	-2.77358	0.00554425	0.55065
MGP_BALBcJ_G0029829__Pigg	547.622	-0.27559	0.0990683	-2.78182	0.00540549	0.55065
MGP_BALBcJ_G0013962__NA	109.708	0.637748	0.230837	2.76276	0.00573148	0.555347
MGP_BALBcJ_G0019957__Nrde2	466.066	0.433657	0.156903	2.76385	0.00571232	0.555347
MGP_BALBcJ_G0025849__Itga4	374.933	-0.966404	0.349349	-2.7663	0.00566965	0.555347
MGP_BALBcJ_G0036136__Alas2	90.1618	1.28244	0.463759	2.76532	0.00568668	0.555347
MGP_BALBcJ_G0029838__Idua	478.225	-0.366187	0.132667	-2.76019	0.00577683	0.557063
MGP_BALBcJ_G0023467__Pglyrp2	11.5795	-2.59202	0.939913	-2.75772	0.00582054	0.558605
MGP_BALBcJ_G0016845__Hlx	95.5476	-0.703499	0.255649	-2.75181	0.00592664	0.560957
MGP_BALBcJ_G0017046__Ptprk	3566.51	0.463026	0.168456	2.74865	0.0059842	0.560957
MGP_BALBcJ_G0020743__Mef2c	419.547	-0.760494	0.276565	-2.74978	0.0059635	0.560957
MGP_BALBcJ_G0021991__NA	14.5403	-2.61919	0.952314	-2.75034	0.00595336	0.560957
MGP_BALBcJ_G0030953__Pcyox1	5438.1	-0.361543	0.131327	-2.753	0.00590513	0.560957
MGP_BALBcJ_G0026359__Trp53bp1	1141.76	-0.365291	0.133212	-2.74217	0.00610349	0.567499
MGP_BALBcJ_G0033250__Tspan32	10.6911	-3.13421	1.14312	-2.7418	0.00611031	0.567499
MGP_BALBcJ_G0017356__Icosl	169.569	-0.97004	0.355485	-2.72878	0.006357	0.569418
MGP_BALBcJ_G0022332__Acvr1b	2825.78	0.480138	0.175871	2.73005	0.0063324	0.569418
MGP_BALBcJ_G0023830__NA	60.5364	-2.03535	0.745531	-2.73006	0.00633224	0.569418
MGP_BALBcJ_G0024849__Gm8369	4.89789	-5.06604	1.85212	-2.73526	0.0062331	0.569418
MGP_BALBcJ_G0027290__Tmem144	665.453	0.618478	0.226202	2.73419	0.00625342	0.569418
MGP_BALBcJ_G0031526__Rdh13	456.607	0.333035	0.121997	2.72987	0.006336	0.569418
MGP_BALBcJ_G0031865__Cyp2b10	10.1251	3.0076	1.0991	2.73643	0.00621102	0.569418
MGP_BALBcJ_G0033502__Gsr	2150.61	0.323012	0.11799	2.73763	0.00618844	0.569418
MGP_BALBcJ_G0004318__NA	17.9862	2.04109	0.750225	2.72063	0.00651573	0.571559
MGP_BALBcJ_G0015130__B230206L02Rik	4.49264	3.02486	1.11464	2.71376	0.00665246	0.571559
MGP_BALBcJ_G0018322__NA	1672.56	-0.197174	0.072597	-2.716	0.0066075	0.571559
MGP_BALBcJ_G0018653__Tlcd2	170.148	0.658156	0.242579	2.71316	0.0066645	0.571559
MGP_BALBcJ_G0020323__Lrrc16a	664.221	0.326393	0.119735	2.72596	0.00641155	0.571559
MGP_BALBcJ_G0027835__Alpk1	723.044	0.415412	0.15292	2.71654	0.00659688	0.571559
MGP_BALBcJ_G0029922__1500011B03Rik	75.1862	0.616772	0.227149	2.71527	0.00662217	0.571559
MGP_BALBcJ_G0031458__Lrmp	320.708	-0.707283	0.259853	-2.72186	0.00649155	0.571559
MGP_BALBcJ_G0033047__Bckdk	1511.11	0.331806	0.12209	2.71772	0.00657332	0.571559
MGP_BALBcJ_G0034500__Srpr	4057.58	-0.267454	0.0982649	-2.72176	0.00649347	0.571559
MGP_BALBcJ_G0000876__NA	3.99926	-4.82695	1.7862	-2.70235	0.00688507	0.576119
MGP_BALBcJ_G0018133__Itk	27.7829	-2.20533	0.816464	-2.70108	0.00691156	0.576119
MGP_BALBcJ_G0018535__Med11	321.267	0.315808	0.11693	2.70084	0.00691649	0.576119
MGP_BALBcJ_G0019985__Unc79	13.5838	-1.3871	0.514113	-2.69804	0.00697495	0.576119
MGP_BALBcJ_G0020039__Bcl11b	18.4233	-2.56861	0.951804	-2.69868	0.00696161	0.576119
MGP_BALBcJ_G0021879__Khdrbs3	2363.69	-0.445177	0.164954	-2.6988	0.00695899	0.576119
MGP_BALBcJ_G0024847__Ms4a4b	32.2167	-1.91842	0.709917	-2.70232	0.00688578	0.576119
MGP_BALBcJ_G0029311__Fam126a	559.273	-0.321481	0.119051	-2.70036	0.00692649	0.576119
MGP_BALBcJ_G0035414__Rpl14	6701.11	0.159289	0.058955	2.70187	0.00689514	0.576119
MGP_BALBcJ_G0000077__Ighv10-1	136.129	-1.54351	0.586883	-2.63001	0.0085383	0.579831
MGP_BALBcJ_G0000082__Ighv1-15	16.1354	-2.95898	1.12346	-2.6338	0.0084434	0.579831
MGP_BALBcJ_G0001412__NA	4.83504	2.69411	1.01107	2.66462	0.0077075	0.579831
MGP_BALBcJ_G0002799__Gm16897	14.0882	-1.5231	0.577927	-2.63545	0.00840247	0.579831
MGP_BALBcJ_G0004163__Abhd11os	336.626	0.721902	0.270574	2.66804	0.00762945	0.579831
MGP_BALBcJ_G0005621__4632428C04Rik	7.13256	-1.98813	0.754858	-2.63378	0.00844393	0.579831
MGP_BALBcJ_G0009625__Gm24379	3.16518	-4.366	1.62494	-2.68686	0.00721265	0.579831
MGP_BALBcJ_G0010216__NA	132.024	0.461229	0.174027	2.65032	0.00804146	0.579831
MGP_BALBcJ_G0011401__NA	1230.23	0.275812	0.104248	2.64573	0.00815141	0.579831
MGP_BALBcJ_G0016100__Wnt6	26.0013	-1.22128	0.45561	-2.68055	0.0073502	0.579831
MGP_BALBcJ_G0016441__Chit1	23.1233	2.13249	0.797671	2.6734	0.00750869	0.579831
MGP_BALBcJ_G0016495__Zbtb41	1581.59	-0.230528	0.0865494	-2.66355	0.00773215	0.579831
MGP_BALBcJ_G0016579__Rfwd2	1561.57	-0.254085	0.0947028	-2.68297	0.00729717	0.579831
MGP_BALBcJ_G0016627__Atp1b1	2169.79	-0.673622	0.252023	-2.67286	0.00752076	0.579831
MGP_BALBcJ_G0016713__Slamf6	54.8847	-1.90986	0.712822	-2.67929	0.00737779	0.579831
MGP_BALBcJ_G0016866__Ptpn14	1187.05	-0.341133	0.129136	-2.64166	0.00825003	0.579831
MGP_BALBcJ_G0017091__Fyn	383.757	-0.576795	0.217935	-2.64664	0.00812967	0.579831
MGP_BALBcJ_G0017205__Psap	53635.6	-0.239713	0.0911542	-2.62975	0.0085447	0.579831
MGP_BALBcJ_G0018129__Adam19	321.415	-0.547836	0.207937	-2.63462	0.00842304	0.579831
MGP_BALBcJ_G0018506__2810408A11Rik	85.7522	0.701834	0.26163	2.68254	0.00730647	0.579831
MGP_BALBcJ_G0018900__Mycbpap	90.1123	-0.808846	0.301489	-2.68284	0.00730002	0.579831
MGP_BALBcJ_G0019101__Ttc25	67.9954	1.06757	0.40524	2.63442	0.00842812	0.579831
MGP_BALBcJ_G0019333__Nt5c	883.737	0.29147	0.109421	2.66375	0.00772747	0.579831
MGP_BALBcJ_G0019477__Cd7	32.8958	-1.32679	0.494033	-2.68562	0.00723944	0.579831
MGP_BALBcJ_G0020499__S1pr3	122.454	-0.891422	0.334211	-2.66724	0.00764769	0.579831
MGP_BALBcJ_G0021088__Dph3	606.675	0.25856	0.0979557	2.63956	0.00830131	0.579831
MGP_BALBcJ_G0021258__Sall2	95.0869	-0.580241	0.215441	-2.69327	0.00707557	0.579831
MGP_BALBcJ_G0021437__Msra	348.463	0.389877	0.147893	2.63621	0.00838376	0.579831
MGP_BALBcJ_G0023342__Fam195a	131.931	0.443218	0.167075	2.65281	0.0079825	0.579831
MGP_BALBcJ_G0024809__Myrf	194.319	1.15675	0.433301	2.66962	0.00759374	0.579831
MGP_BALBcJ_G0024988__Slc1a1	380.709	0.576501	0.215118	2.67993	0.00736379	0.579831
MGP_BALBcJ_G0025680__Rpl35	4088.94	0.247989	0.0922368	2.68861	0.007175	0.579831
MGP_BALBcJ_G0025688__Gtdc1	223.959	0.510814	0.192919	2.64781	0.00810155	0.579831
MGP_BALBcJ_G0026103__Mtch2	2840.91	0.159639	0.0606976	2.63008	0.00853648	0.579831
MGP_BALBcJ_G0026154__Hsd17b12	5174.08	-0.20755	0.0788984	-2.6306	0.00852331	0.579831
MGP_BALBcJ_G0026486__Ubox5	269.148	0.31676	0.119609	2.64829	0.00809008	0.579831
MGP_BALBcJ_G0028767__Psmb2	2205.88	0.17013	0.064278	2.64679	0.00812593	0.579831
MGP_BALBcJ_G0028812__Eif3i	2324.73	0.190329	0.0709647	2.68203	0.00731776	0.579831
MGP_BALBcJ_G0028942__Rpl11	7378.35	0.174925	0.0651403	2.68535	0.0072454	0.579831
MGP_BALBcJ_G0029768__Mrps18c	245.306	0.365467	0.137104	2.66563	0.0076844	0.579831
MGP_BALBcJ_G0029961__Vsig10	1360.29	0.440906	0.165461	2.66471	0.00770558	0.579831
MGP_BALBcJ_G0029966__Fbxo21	249.464	0.555556	0.209873	2.6471	0.00811843	0.579831
MGP_BALBcJ_G0030477__Ndufa5	533.983	0.32074	0.121432	2.64132	0.00825829	0.579831
MGP_BALBcJ_G0031124__Tamm41	256.651	0.470642	0.177832	2.64655	0.00813175	0.579831
MGP_BALBcJ_G0031253__Cd4	103.926	-1.42671	0.535904	-2.66225	0.00776198	0.579831
MGP_BALBcJ_G0032441__Il16	337.895	-0.806404	0.302325	-2.66734	0.00764541	0.579831
MGP_BALBcJ_G0032472__Folh1	2.1995	4.24593	1.61439	2.63004	0.0085374	0.579831
MGP_BALBcJ_G0032845__Sbf2	2266.89	0.399882	0.151089	2.64666	0.00812901	0.579831
MGP_BALBcJ_G0033661__Ndufa13	1388.7	0.190634	0.072039	2.64626	0.00813868	0.579831
MGP_BALBcJ_G0034434__Rab3d	2037.33	0.322248	0.122282	2.63528	0.00840674	0.579831
MGP_BALBcJ_G0034703__Scn2b	23.2243	-1.02215	0.382443	-2.67268	0.00752478	0.579831
MGP_BALBcJ_G0035188__Atp2c1	5411.92	-0.18934	0.071217	-2.65863	0.00784599	0.579831
MGP_BALBcJ_G0035385__Vill	497.089	0.763044	0.288231	2.64733	0.00811295	0.579831
MGP_BALBcJ_G0031297__Tead4	597.973	0.937573	0.356958	2.62657	0.00862511	0.583324
MGP_BALBcJ_G0006020__Gm14230	7.96996	-2.59648	0.990526	-2.62131	0.00875927	0.588448
MGP_BALBcJ_G0006986__Gm1965	2.36976	-4.8531	1.85126	-2.62151	0.00875406	0.588448
MGP_BALBcJ_G0031386__Lrp6	4172.59	-0.167966	0.0641743	-2.61735	0.00886162	0.592462
MGP_BALBcJ_G0031682__C5ar2	181.877	-1.04506	0.399375	-2.61672	0.00887781	0.592462
MGP_BALBcJ_G0028796__Fndc5	150.624	-1.49008	0.57032	-2.61271	0.00898267	0.597481
MGP_BALBcJ_G0019246__Cd79b	67.6083	-2.59403	0.993871	-2.61002	0.00905358	0.598249
MGP_BALBcJ_G0024818__Cyb561a3	507.204	-0.333756	0.127852	-2.61049	0.00904114	0.598249
MGP_BALBcJ_G0030093__Slc15a4	496.996	-0.336485	0.128979	-2.60883	0.00908517	0.598374
MGP_BALBcJ_G0000010__Ighm	987.461	-2.02121	0.779308	-2.59359	0.00949796	0.600479
MGP_BALBcJ_G0001682__NA	23.7142	1.01417	0.392368	2.58474	0.00974518	0.600479
MGP_BALBcJ_G0002238__NA	32.891	1.5506	0.59863	2.59025	0.00959051	0.600479
MGP_BALBcJ_G0004281__Gm26588	28.1121	0.986493	0.380473	2.5928	0.00951972	0.600479
MGP_BALBcJ_G0004346__Gm28523	7.35923	-1.63473	0.628662	-2.60034	0.00931327	0.600479
MGP_BALBcJ_G0004836__Gm29186	69.4091	-1.01811	0.394294	-2.5821	0.00982014	0.600479
MGP_BALBcJ_G0007312__Gm17435	27.7835	-0.916737	0.355757	-2.57686	0.00997014	0.600479
MGP_BALBcJ_G0015878__2010300C02Rik	631.479	0.400295	0.154683	2.58785	0.0096578	0.600479
MGP_BALBcJ_G0016774__Kmo	40.9893	-1.39418	0.540531	-2.57928	0.00990053	0.600479
MGP_BALBcJ_G0016978__Perp	1486.3	0.349363	0.134828	2.59118	0.00956465	0.600479
MGP_BALBcJ_G0017468__Lmnb2	440.496	0.324438	0.125892	2.57711	0.00996308	0.600479
MGP_BALBcJ_G0018701__Flot2	2283.06	0.394773	0.15262	2.58665	0.00969144	0.600479
MGP_BALBcJ_G0022912__Cggbp1	2748.86	-0.284481	0.109986	-2.58652	0.00969514	0.600479
MGP_BALBcJ_G0023512__Rps18	7370.27	0.183775	0.0708502	2.59385	0.00949076	0.600479
MGP_BALBcJ_G0023912__Dennd1c	187.278	-1.17329	0.454148	-2.5835	0.00978045	0.600479
MGP_BALBcJ_G0024582__Cd226	28.6108	-1.28934	0.498058	-2.58873	0.00963304	0.600479
MGP_BALBcJ_G0024755__Rcor2	110.622	0.987048	0.379677	2.59971	0.00933034	0.600479
MGP_BALBcJ_G0025149__Sema4g	383.374	0.75166	0.292009	2.5741	0.0100501	0.600479
MGP_BALBcJ_G0025295__Camk1d	316.627	-0.565165	0.217109	-2.60314	0.00923729	0.600479
MGP_BALBcJ_G0026135__Pex16	627.243	0.266848	0.103524	2.57764	0.00994769	0.600479
MGP_BALBcJ_G0028089__Pm20d2	24.1365	0.982495	0.379477	2.58908	0.00962328	0.600479
MGP_BALBcJ_G0029091__Plod1	1103.74	-0.30595	0.117882	-2.59538	0.0094486	0.600479
MGP_BALBcJ_G0030576__Parp12	879.861	0.286577	0.110215	2.60017	0.00931767	0.600479
MGP_BALBcJ_G0032036__Usf2	832.63	0.277262	0.107066	2.58965	0.00960744	0.600479
MGP_BALBcJ_G0032958__Gtf3c1	3025.99	-0.215184	0.0832055	-2.58618	0.00970471	0.600479
MGP_BALBcJ_G0033091__Bub3	891.696	0.214055	0.0831319	2.57488	0.0100274	0.600479
MGP_BALBcJ_G0033122__9430038I01Rik	135.944	0.551776	0.213791	2.58091	0.00985396	0.600479
MGP_BALBcJ_G0034032__Gfod2	520.082	0.36476	0.141502	2.57777	0.00994401	0.600479
MGP_BALBcJ_G0034319__Sesn3	1284.45	-0.45795	0.177103	-2.58578	0.00971593	0.600479
MGP_BALBcJ_G0034698__Cd3e	24.4849	-1.97642	0.767304	-2.57579	0.010001	0.600479
MGP_BALBcJ_G0035768__Zfp185	385.171	0.7203	0.27873	2.58422	0.00975985	0.600479
MGP_BALBcJ_G0035927__Gjb1	119.016	0.934976	0.363324	2.5734	0.0100705	0.600479
MGP_BALBcJ_G0014520__NA	58.8989	1.56774	0.609874	2.5706	0.0101524	0.603573
MGP_BALBcJ_G0014037__NA	320.256	0.36905	0.143686	2.56845	0.0102155	0.605542
MGP_BALBcJ_G0018180__3010026O09Rik	59.8553	0.680885	0.26525	2.56696	0.0102595	0.606366
MGP_BALBcJ_G0010315__NA	30.6761	1.03505	0.40361	2.56448	0.0103331	0.608928
MGP_BALBcJ_G0017064__Nkain2	3.03162	-3.78778	1.47774	-2.56322	0.0103708	0.609366
MGP_BALBcJ_G0030387__Hsph1	1437.15	-0.761803	0.297553	-2.56023	0.0104603	0.61284
MGP_BALBcJ_G0015587__NA	8.39561	-2.17307	0.849927	-2.55677	0.010565	0.61304
MGP_BALBcJ_G0017526__Chst11	829.971	-0.914237	0.357491	-2.55737	0.0105467	0.61304
MGP_BALBcJ_G0023042__Dscr3	993.763	-0.205823	0.0804945	-2.55698	0.0105585	0.61304
MGP_BALBcJ_G0025308__9230102O04Rik	24.3681	0.983809	0.385109	2.55462	0.0106303	0.61304
MGP_BALBcJ_G0028615__Ccdc163	190.559	-0.671306	0.262913	-2.55334	0.0106695	0.61304
MGP_BALBcJ_G0030559__Creb3l2	1757.55	-0.373308	0.146066	-2.55575	0.0105958	0.61304
MGP_BALBcJ_G0034316__Mtmr2	2199.95	-0.253044	0.099112	-2.55311	0.0106766	0.61304
MGP_BALBcJ_G0016920__Myct1	103.444	-0.879457	0.344946	-2.54955	0.0107862	0.614179
MGP_BALBcJ_G0019014__Nr1d1	540.983	0.968213	0.380497	2.5446	0.0109403	0.614179
MGP_BALBcJ_G0020083__Xrcc3	77.5736	0.504081	0.198062	2.54506	0.0109259	0.614179
MGP_BALBcJ_G0021665__Fyb	626.989	-0.776033	0.304522	-2.54837	0.0108228	0.614179
MGP_BALBcJ_G0024158__Mapre2	872.001	-0.278139	0.109163	-2.54792	0.0108368	0.614179
MGP_BALBcJ_G0027730__Gstm7	25.1573	1.18114	0.464033	2.54539	0.0109157	0.614179
MGP_BALBcJ_G0028560__Bend5	105.985	0.673867	0.264725	2.54553	0.0109112	0.614179
MGP_BALBcJ_G0029857__Golga3	2096.1	-0.180753	0.0710063	-2.54559	0.0109093	0.614179
MGP_BALBcJ_G0016295__St8sia4	281.928	-0.6352	0.249994	-2.54087	0.0110579	0.615636
MGP_BALBcJ_G0024335__Nr3c1	2731.44	-0.366945	0.14439	-2.54134	0.0110427	0.615636
MGP_BALBcJ_G0033760__Slc35e1	1832.24	-0.240724	0.094681	-2.54248	0.011007	0.615636
MGP_BALBcJ_G0022655__Bcl6	878.031	1.34714	0.530992	2.53703	0.0111797	0.618322
MGP_BALBcJ_G0024318__Pcdhgc3	482.172	-0.405082	0.159945	-2.53263	0.0113209	0.618322
MGP_BALBcJ_G0024617__Ptprcap	21.858	-2.09715	0.827207	-2.53522	0.0112376	0.618322
MGP_BALBcJ_G0027343__Sh2d2a	20.5819	-1.90044	0.749212	-2.53658	0.0111942	0.618322
MGP_BALBcJ_G0029177__Prdm16	80.0434	0.76077	0.300049	2.53549	0.0112292	0.618322
MGP_BALBcJ_G0030685__Gimap8	239.406	-0.954871	0.377007	-2.53277	0.0113165	0.618322
MGP_BALBcJ_G0031083__Edem1	3385.56	-0.262093	0.103448	-2.53358	0.0112906	0.618322
MGP_BALBcJ_G0027427__Nup210l	25.9968	-1.16002	0.458265	-2.53133	0.011363	0.618422
MGP_BALBcJ_G0030040__Rhof	27.174	-1.7264	0.682188	-2.53068	0.0113841	0.618422
MGP_BALBcJ_G0025031__Ch25h	77.321	1.4927	0.590641	2.52725	0.011496	0.620035
MGP_BALBcJ_G0025784__Erich2	14.7754	-1.31243	0.519024	-2.52865	0.0114502	0.620035
MGP_BALBcJ_G0031998__Sdhaf1	293.079	0.401254	0.15879	2.52694	0.0115061	0.620035
MGP_BALBcJ_G0017606__Tmcc3	828.722	-0.358266	0.141974	-2.52346	0.0116208	0.621033
MGP_BALBcJ_G0018927__Phb	788.31	-0.288102	0.114266	-2.52133	0.0116911	0.621033
MGP_BALBcJ_G0022850__Rpl24	33.9012	0.971091	0.385231	2.5208	0.0117088	0.621033
MGP_BALBcJ_G0024427__Smim3	566.698	0.30224	0.119872	2.52135	0.0116905	0.621033
MGP_BALBcJ_G0030321__Cyth3	1225.21	-0.316978	0.125613	-2.52344	0.0116212	0.621033
MGP_BALBcJ_G0030838__Cd8a	14.355	-2.64874	1.05076	-2.52078	0.0117095	0.621033
MGP_BALBcJ_G0005303__Gm26520	2.39958	-3.72579	1.49997	-2.4839	0.0129952	0.621945
MGP_BALBcJ_G0006053__Gm9873	1.75619	-4.5022	1.80568	-2.49335	0.0126544	0.621945
MGP_BALBcJ_G0015881__Mitd1	422.22	0.262916	0.105293	2.49699	0.0125252	0.621945
MGP_BALBcJ_G0017283__Zwint	2662.28	0.355865	0.141873	2.50834	0.0121301	0.621945
MGP_BALBcJ_G0019465__NA	319.025	0.293559	0.118083	2.48603	0.0129175	0.621945
MGP_BALBcJ_G0019572__Taf1b	295.018	0.312768	0.124741	2.50734	0.0121642	0.621945
MGP_BALBcJ_G0019646__Ifrd1	2700.51	0.36428	0.146309	2.4898	0.0127815	0.621945
MGP_BALBcJ_G0020325__Fam65b	215.525	-0.995845	0.399194	-2.49464	0.0126084	0.621945
MGP_BALBcJ_G0020370__A530084C06Rik	7.86951	2.01813	0.809954	2.49167	0.0127145	0.621945
MGP_BALBcJ_G0020371__Foxq1	76.689	0.973701	0.388906	2.50369	0.0122905	0.621945
MGP_BALBcJ_G0020543__Rgs14	57.3002	-1.12203	0.45166	-2.48424	0.0129829	0.621945
MGP_BALBcJ_G0022012__Il2rb	75.2502	-1.16107	0.466626	-2.48823	0.0128379	0.621945
MGP_BALBcJ_G0022517__Mcm4	445.974	0.269738	0.107722	2.50403	0.0122787	0.621945
MGP_BALBcJ_G0022679__Atp13a3	7609.98	-0.269517	0.107985	-2.49588	0.0125644	0.621945
MGP_BALBcJ_G0022732__Hacd2	665.447	0.369257	0.148426	2.48782	0.012853	0.621945
MGP_BALBcJ_G0023139__Fam120b	1069.06	-0.211061	0.0849976	-2.48315	0.0130228	0.621945
MGP_BALBcJ_G0023238__Tceb2	1293.29	0.210207	0.0839744	2.50323	0.0123067	0.621945
MGP_BALBcJ_G0023626__H2-T24	356.447	-0.467129	0.186916	-2.49914	0.0124495	0.621945
MGP_BALBcJ_G0024036__Haao	23.2718	-1.49581	0.597276	-2.50439	0.0122662	0.621945
MGP_BALBcJ_G0024139__Dsc1	8.90711	4.40139	1.7501	2.51493	0.0119056	0.621945
MGP_BALBcJ_G0024729__Rasgrp2	169.032	-0.89817	0.356712	-2.51791	0.0118052	0.621945
MGP_BALBcJ_G0024824__Cd5	11.7571	-3.07309	1.23438	-2.48958	0.0127893	0.621945
MGP_BALBcJ_G0024932__Psat1	410.562	0.491347	0.197309	2.49024	0.0127658	0.621945
MGP_BALBcJ_G0024966__Apba1	82.997	-0.645563	0.259336	-2.48929	0.0128	0.621945
MGP_BALBcJ_G0025329__Trdmt1	123.291	0.611515	0.246137	2.48445	0.012975	0.621945
MGP_BALBcJ_G0025422__Ptgds	48.8102	-1.19665	0.47588	-2.51461	0.0119165	0.621945
MGP_BALBcJ_G0026616__Sdcbp2	324.684	0.731142	0.293269	2.49308	0.0126641	0.621945
MGP_BALBcJ_G0026856__Pltp	1250.3	-0.555194	0.221885	-2.50217	0.0123433	0.621945
MGP_BALBcJ_G0026939__Npepl1	1485.98	0.209365	0.084284	2.48404	0.01299	0.621945
MGP_BALBcJ_G0027148__Fat4	318.247	-0.403089	0.16018	-2.51647	0.0118536	0.621945
MGP_BALBcJ_G0028588__Efcab14	1555.59	-0.207492	0.0826697	-2.50989	0.012077	0.621945
MGP_BALBcJ_G0028673__Svbp	226.157	0.345677	0.137972	2.50542	0.0122306	0.621945
MGP_BALBcJ_G0028995__Minos1	949.257	0.206392	0.0828397	2.49146	0.0127219	0.621945
MGP_BALBcJ_G0031135__Rpl32	6063.24	0.19226	0.0773835	2.48451	0.0129731	0.621945
MGP_BALBcJ_G0032984__Gdpd3	180.034	0.631503	0.253712	2.48906	0.0128082	0.621945
MGP_BALBcJ_G0033555__Tlr3	2146.93	-0.245905	0.0979272	-2.5111	0.0120355	0.621945
MGP_BALBcJ_G0033678__Ddx49	661.659	0.230906	0.0923144	2.5013	0.0123739	0.621945
MGP_BALBcJ_G0034180__Irf8	456.109	-0.967107	0.38525	-2.51033	0.0120617	0.621945
MGP_BALBcJ_G0034676__Vps11	1523.08	0.288384	0.115668	2.49321	0.0126594	0.621945
MGP_BALBcJ_G0034918__Slc24a1	5.53834	-2.40299	0.966968	-2.48508	0.0129523	0.621945
MGP_BALBcJ_G0035360__Bcl2a1c	2.78036	4.05451	1.623	2.49815	0.0124844	0.621945
MGP_BALBcJ_G0035954__Chic1	86.7413	-0.742739	0.29496	-2.5181	0.0117989	0.621945
MGP_BALBcJ_G0005299__Gm17586	76.4636	0.686713	0.276651	2.48224	0.0130559	0.622055
MGP_BALBcJ_G0031167__Zfp9	423.321	-0.451316	0.181881	-2.48139	0.0130872	0.622076
MGP_BALBcJ_G0024653__Brms1	882.877	0.234199	0.0944304	2.48012	0.0131338	0.622823
MGP_BALBcJ_G0000114__Igkv14-100	55.2414	1.91095	0.781764	2.44441	0.0145088	0.624004
MGP_BALBcJ_G0000209__NA	2.83548	-5.25641	2.13409	-2.46307	0.0137753	0.624004
MGP_BALBcJ_G0007321__Gm26532	257.999	0.912988	0.375508	2.43134	0.015043	0.624004
MGP_BALBcJ_G0008186__Mirlet7c-2	9.12694	1.68384	0.690808	2.4375	0.0147894	0.624004
MGP_BALBcJ_G0015609__A230056P14Rik	30.4645	-0.864103	0.350067	-2.46839	0.0135721	0.624004
MGP_BALBcJ_G0016622__F5	658.845	-0.523468	0.21207	-2.46838	0.0135727	0.624004
MGP_BALBcJ_G0017533__Nuak1	220.953	-0.58017	0.237925	-2.43846	0.0147501	0.624004
MGP_BALBcJ_G0017549__Bpifc	34.8446	1.58529	0.652597	2.42921	0.0151319	0.624004
MGP_BALBcJ_G0017820__Pym1	381.883	0.341363	0.139675	2.44398	0.0145261	0.624004
MGP_BALBcJ_G0017826__NA	46.4487	-0.885346	0.364396	-2.42963	0.0151143	0.624004
MGP_BALBcJ_G0018093__Dock2	477.293	-0.950957	0.391499	-2.42902	0.0151398	0.624004
MGP_BALBcJ_G0018385__Fam83g	219.824	0.625891	0.253365	2.47031	0.0134996	0.624004
MGP_BALBcJ_G0018582__Spns3	113.031	0.54407	0.221052	2.46127	0.0138445	0.624004
MGP_BALBcJ_G0018707__Rpl23a	9095.08	0.159139	0.0650148	2.44774	0.0143754	0.624004
MGP_BALBcJ_G0018982__Rpl23	5995.1	0.293261	0.119169	2.46088	0.0138599	0.624004
MGP_BALBcJ_G0019369__Ubald2	842.415	0.300017	0.123163	2.43593	0.0148534	0.624004
MGP_BALBcJ_G0019522__Klhl29	205.396	-0.646575	0.263824	-2.45078	0.0142547	0.624004
MGP_BALBcJ_G0019535__Osr1	144.06	-0.501771	0.206858	-2.42568	0.0152799	0.624004
MGP_BALBcJ_G0019559__Kcnf1	2.91403	-4.43577	1.82	-2.43724	0.0147999	0.624004
MGP_BALBcJ_G0019587__Rps7	7018.89	0.162164	0.0656081	2.47171	0.0134468	0.624004
MGP_BALBcJ_G0021278__4931414P19Rik	107.546	-0.58413	0.235847	-2.47674	0.013259	0.624004
MGP_BALBcJ_G0021306__Dhrs4	546.161	0.242919	0.0999327	2.43083	0.0150644	0.624004
MGP_BALBcJ_G0021771__Rrm2b	536.686	-0.285105	0.115985	-2.45813	0.0139663	0.624004
MGP_BALBcJ_G0022130__Bik	282.826	0.546775	0.222118	2.46164	0.0138303	0.624004
MGP_BALBcJ_G0022329__Fignl2	529.222	0.308174	0.125897	2.44784	0.0143716	0.624004
MGP_BALBcJ_G0022721__Snx4	1553.08	0.262007	0.107914	2.42793	0.0151854	0.624004
MGP_BALBcJ_G0022866__Filip1l	758.87	-0.611981	0.252353	-2.4251	0.0153043	0.624004
MGP_BALBcJ_G0023413__Brpf3	1330.26	0.327561	0.134092	2.44281	0.0145736	0.624004
MGP_BALBcJ_G0024035__Mta3	1621.6	0.340174	0.13883	2.4503	0.0142738	0.624004
MGP_BALBcJ_G0024084__Map3k8	397.585	0.619607	0.252894	2.45006	0.0142831	0.624004
MGP_BALBcJ_G0024113__Gata6	25.2361	1.02789	0.420884	2.44222	0.0145971	0.624004
MGP_BALBcJ_G0024330__NA	597.607	-0.462568	0.190393	-2.42955	0.0151177	0.624004
MGP_BALBcJ_G0024680__1700020D05Rik	11.0842	-1.53725	0.626301	-2.45449	0.0141085	0.624004
MGP_BALBcJ_G0025154__Sfxn3	3600.33	0.354411	0.143678	2.46671	0.0136362	0.624004
MGP_BALBcJ_G0025186__Borcs7	207.161	0.349693	0.143552	2.436	0.0148508	0.624004
MGP_BALBcJ_G0025342__NA	70.7174	-0.763133	0.308236	-2.47581	0.0132936	0.624004
MGP_BALBcJ_G0025498__Ralgds	5402.08	0.3153	0.128593	2.45193	0.0142093	0.624004
MGP_BALBcJ_G0026718__Mmp24	2.90617	-4.1072	1.6927	-2.42642	0.0152485	0.624004
MGP_BALBcJ_G0026862__Cd40	31.801	-1.90045	0.772574	-2.45989	0.0138979	0.624004
MGP_BALBcJ_G0027082__Tnfsf10	350.385	-0.59163	0.240029	-2.46483	0.0137077	0.624004
MGP_BALBcJ_G0027613__Chd1l	386.795	0.364519	0.14718	2.47668	0.013261	0.624004
MGP_BALBcJ_G0027776__Extl2	188.98	0.389482	0.15876	2.45327	0.0141562	0.624004
MGP_BALBcJ_G0027819__Sec24d	1669.84	-0.371977	0.153066	-2.43017	0.0150918	0.624004
MGP_BALBcJ_G0029037__Plekhm2	3332.28	-0.306991	0.126482	-2.42715	0.015218	0.624004
MGP_BALBcJ_G0029574__Atp8a1	873.511	-0.415234	0.168543	-2.46367	0.0137521	0.624004
MGP_BALBcJ_G0029599__Fryl	2718.57	-0.282907	0.116586	-2.4266	0.0152413	0.624004
MGP_BALBcJ_G0029707__Cxcl1	433.626	0.726516	0.297323	2.44353	0.0145445	0.624004
MGP_BALBcJ_G0029756__Hnrnpd	1591.75	0.322831	0.131372	2.45738	0.0139956	0.624004
MGP_BALBcJ_G0029795__Abcg3	41.5352	-1.74254	0.713068	-2.44372	0.0145367	0.624004
MGP_BALBcJ_G0029944__Msi1	35.1315	-1.02654	0.416437	-2.46506	0.013699	0.624004
MGP_BALBcJ_G0029949__Gcn1l1	3589.15	-0.225598	0.0928937	-2.42856	0.015159	0.624004
MGP_BALBcJ_G0030293__Gna12	1582.88	-0.275516	0.111315	-2.4751	0.0133198	0.624004
MGP_BALBcJ_G0030554__Fam180a	28.155	-1.48751	0.605226	-2.45777	0.0139801	0.624004
MGP_BALBcJ_G0030837__Cd8b1	7.23206	-2.94452	1.21445	-2.42458	0.0153261	0.624004
MGP_BALBcJ_G0031133__Tmem40	74.32	0.726943	0.295374	2.4611	0.0138513	0.624004
MGP_BALBcJ_G0031178__Wnk1	8326.45	-0.213185	0.0871274	-2.44682	0.0144122	0.624004
MGP_BALBcJ_G0031743__Snrpd2	636.552	0.242719	0.0993992	2.44186	0.0146118	0.624004
MGP_BALBcJ_G0032846__Adm	137.614	-0.711831	0.293019	-2.4293	0.015128	0.624004
MGP_BALBcJ_G0032957__Il21r	67.9767	-1.60221	0.649909	-2.46528	0.0136907	0.624004
MGP_BALBcJ_G0033149__Mtg1	293.282	0.327568	0.133153	2.46009	0.0138901	0.624004
MGP_BALBcJ_G0034340__Slc36a4	494.955	0.404596	0.16479	2.45522	0.0140797	0.624004
MGP_BALBcJ_G0034344__Naalad2	69.8631	-0.644366	0.261262	-2.46636	0.0136494	0.624004
MGP_BALBcJ_G0034583__Olfr920	78.5787	0.92226	0.37945	2.43052	0.0150773	0.624004
MGP_BALBcJ_G0035128__Rbp1	4001.33	-0.567096	0.23323	-2.43149	0.0150367	0.624004
MGP_BALBcJ_G0035189__Pik3r4	970.424	-0.20022	0.0815847	-2.45414	0.0141223	0.624004
MGP_BALBcJ_G0035329__Ccdc12	683.418	0.254384	0.102954	2.47085	0.0134792	0.624004
MGP_BALBcJ_G0035916__Gdpd2	829.47	1.76667	0.713396	2.47643	0.0132704	0.624004
MGP_BALBcJ_G0036028__Pcdh19	182.261	-0.503967	0.205944	-2.44711	0.0144007	0.624004
MGP_BALBcJ_G0036144__Fam120c	298.8	-0.407547	0.166606	-2.44617	0.0144384	0.624004
MGP_BALBcJ_G0040167__NA	2.37778	-4.03614	1.66101	-2.42993	0.0151018	0.624004
MGP_BALBcJ_G0035290__Uqcrc1	2778.61	0.214806	0.0886397	2.42336	0.0153777	0.624842
MGP_BALBcJ_G0027879__Manba	1163.25	-0.355821	0.146875	-2.42262	0.015409	0.624855
MGP_BALBcJ_G0003245__Gm16136	605.039	0.474549	0.19652	2.41476	0.0157454	0.625157
MGP_BALBcJ_G0003984__Gm13111	5.5344	-1.79188	0.741804	-2.41557	0.0157108	0.625157
MGP_BALBcJ_G0005378__Mirg	18.8946	-1.30509	0.540983	-2.41244	0.0158462	0.625157
MGP_BALBcJ_G0007406__2900052N01Rik	2.86134	-4.82819	1.99445	-2.42082	0.0154856	0.625157
MGP_BALBcJ_G0015698__4930447F24Rik	2.79451	-4.10723	1.6964	-2.42114	0.015472	0.625157
MGP_BALBcJ_G0020301__Hist1h2be	45.5669	-0.787796	0.326313	-2.41423	0.0157684	0.625157
MGP_BALBcJ_G0021200__Tlr11	19.6597	-1.142	0.472789	-2.41544	0.015716	0.625157
MGP_BALBcJ_G0021927__Gsdmd	265.04	-0.60036	0.248861	-2.41243	0.0158467	0.625157
MGP_BALBcJ_G0026141__Syt13	2.09046	-4.91633	2.03442	-2.41657	0.0156676	0.625157
MGP_BALBcJ_G0027924__Clca3b	5789.46	-0.486379	0.201622	-2.41233	0.0158507	0.625157
MGP_BALBcJ_G0030147__Abhd11	1053.66	0.260195	0.107758	2.41463	0.0157513	0.625157
MGP_BALBcJ_G0031191__Bid	492.939	-0.449887	0.186182	-2.41638	0.0156757	0.625157
MGP_BALBcJ_G0031957__Fam98c	397.388	0.425151	0.17587	2.41742	0.015631	0.625157
MGP_BALBcJ_G0032027__NA	1196.2	0.589669	0.244028	2.4164	0.015675	0.625157
MGP_BALBcJ_G0021835__Atad2	287.243	-0.324028	0.134362	-2.4116	0.0158826	0.625193
MGP_BALBcJ_G0016548__Glul	13007.1	0.544509	0.226009	2.40923	0.0159861	0.625598
MGP_BALBcJ_G0027332__Kirrel	579.577	-0.359711	0.149273	-2.40976	0.0159631	0.625598
MGP_BALBcJ_G0034104__St3gal2	288.72	-0.609158	0.252809	-2.40956	0.0159718	0.625598
MGP_BALBcJ_G0022321__Pou6f1	1475.29	0.55852	0.232041	2.40699	0.0160845	0.628232
MGP_BALBcJ_G0002918__Gm12207	16.7083	-1.03816	0.432113	-2.40252	0.0162826	0.630672
MGP_BALBcJ_G0016435__Lax1	134.055	-0.833278	0.346954	-2.4017	0.0163192	0.630672
MGP_BALBcJ_G0016838__Brox	1016.19	0.196555	0.0818211	2.40225	0.0162945	0.630672
MGP_BALBcJ_G0017351__Trpm2	233.345	-0.915103	0.38153	-2.39851	0.0164619	0.630672
MGP_BALBcJ_G0018587__Atp2a3	400.93	-0.711393	0.296678	-2.39786	0.0164912	0.630672
MGP_BALBcJ_G0019731__Klhdc2	1772.3	0.1951	0.0812559	2.40105	0.0163479	0.630672
MGP_BALBcJ_G0024599__Unc93b1	2030.2	-0.292905	0.122096	-2.39898	0.016441	0.630672
MGP_BALBcJ_G0024843__Ms4a14	71.6267	-1.29664	0.53956	-2.40315	0.0162546	0.630672
MGP_BALBcJ_G0025827__Mtx2	799.898	0.231802	0.0965893	2.39987	0.016401	0.630672
MGP_BALBcJ_G0029398__Krtcap3	708.894	0.577792	0.240792	2.39955	0.0164153	0.630672
MGP_BALBcJ_G0032506__Kctd21	274.971	-0.386463	0.160992	-2.40051	0.0163721	0.630672
MGP_BALBcJ_G0018141__Havcr1	5.79213	-3.39997	1.41875	-2.39645	0.0165546	0.631898
MGP_BALBcJ_G0002747__Gm37469	1.84102	-4.2535	1.77652	-2.39429	0.0166528	0.633543
MGP_BALBcJ_G0025171__Elovl3	42.8018	1.67299	0.699599	2.39135	0.0167863	0.633543
MGP_BALBcJ_G0027300__Map9	78.0583	-0.925855	0.38699	-2.39245	0.0167361	0.633543
MGP_BALBcJ_G0028776__Dlgap3	8.75398	2.05125	0.857689	2.3916	0.016775	0.633543
MGP_BALBcJ_G0032361__Fam174b	552.537	-0.865147	0.361522	-2.39307	0.016708	0.633543
MGP_BALBcJ_G0036067__Ngfrap1	910.509	0.471771	0.197104	2.39351	0.0166879	0.633543
MGP_BALBcJ_G0023466__Rasal3	173.279	-1.09829	0.45953	-2.39003	0.016847	0.634644
MGP_BALBcJ_G0031641__Chmp2a	2719.42	0.193412	0.0809707	2.38867	0.0169094	0.635805
MGP_BALBcJ_G0034193__Banp	549.787	-0.479602	0.200952	-2.38666	0.0170024	0.638113
MGP_BALBcJ_G0001303__NA	3.04557	-2.98103	1.24983	-2.38514	0.0170725	0.639473
MGP_BALBcJ_G0026317__Ino80	1220.09	0.219738	0.0921525	2.38451	0.0171021	0.639473
MGP_BALBcJ_G0029777__Slc10a6	89.2854	1.08904	0.457253	2.38171	0.0172325	0.642094
MGP_BALBcJ_G0033075__Nsmce4a	894.745	0.275193	0.115548	2.38163	0.0172363	0.642094
MGP_BALBcJ_G0034286__Pdgfd	394.801	-0.497214	0.208889	-2.38028	0.0172996	0.642094
MGP_BALBcJ_G0034641__NA	5396.6	-0.314818	0.132245	-2.38056	0.0172863	0.642094
MGP_BALBcJ_G0024292__Pcdhb17	313.702	0.372723	0.156676	2.37894	0.0173624	0.642987
MGP_BALBcJ_G0028281__Fktn	732.591	-0.211576	0.0889571	-2.37841	0.0173875	0.642987
MGP_BALBcJ_G0026270__Fmn1	1327.52	-0.482865	0.203081	-2.3777	0.0174211	0.64305
MGP_BALBcJ_G0019353__H3f3b	8374.34	0.336827	0.141753	2.37616	0.017494	0.643383
MGP_BALBcJ_G0031258__Pianp	358.448	-0.517071	0.217562	-2.37666	0.0174703	0.643383
MGP_BALBcJ_G0000012__Iglc3	71.0231	-1.25078	0.528459	-2.36684	0.0179407	0.645673
MGP_BALBcJ_G0003988__1500002C15Rik	24.5066	-0.810881	0.342252	-2.36925	0.0178242	0.645673
MGP_BALBcJ_G0018068__Il9r	15.8897	-3.0078	1.27035	-2.36768	0.0178998	0.645673
MGP_BALBcJ_G0020399__Psmg4	133.085	0.453971	0.191798	2.36692	0.0179368	0.645673
MGP_BALBcJ_G0021223__Rnase10	26.781	1.46927	0.620061	2.36956	0.0178093	0.645673
MGP_BALBcJ_G0022531__Ypel1	162.859	0.639281	0.269827	2.36923	0.0178252	0.645673
MGP_BALBcJ_G0024253__Ndufa2	871.399	0.279006	0.117544	2.37364	0.0176139	0.645673
MGP_BALBcJ_G0025416__Entpd2	242.338	0.438091	0.184804	2.37057	0.0177605	0.645673
MGP_BALBcJ_G0027025__Stmn2	26.7691	-1.20953	0.510831	-2.36777	0.0178955	0.645673
MGP_BALBcJ_G0028067__Mms22l	230.4	0.391503	0.165184	2.3701	0.0177832	0.645673
MGP_BALBcJ_G0028771__Zmym4	1119.88	0.256183	0.108179	2.36815	0.0178773	0.645673
MGP_BALBcJ_G0036118__Acsl4	12490.7	-0.415481	0.175119	-2.37257	0.017665	0.645673
MGP_BALBcJ_G0033960__Mmp15	2187.58	-0.333396	0.140918	-2.36589	0.0179869	0.64618
MGP_BALBcJ_G0010162__NA	6.69283	2.1485	0.912692	2.35403	0.0185711	0.646592
MGP_BALBcJ_G0016550__Cacna1e	73.3024	-0.802003	0.340893	-2.35265	0.01864	0.646592
MGP_BALBcJ_G0020119__Wdr60	544.307	0.458964	0.194304	2.36209	0.0181724	0.646592
MGP_BALBcJ_G0020458__Gmpr	557.199	0.554822	0.235482	2.35611	0.0184672	0.646592
MGP_BALBcJ_G0020925__Ccl28	94.8126	2.13415	0.903846	2.36119	0.0182163	0.646592
MGP_BALBcJ_G0021020__Anxa11	1015.76	0.595575	0.252773	2.35616	0.0184648	0.646592
MGP_BALBcJ_G0021767__Zfp706	2688.27	-0.213031	0.0905191	-2.35344	0.0186006	0.646592
MGP_BALBcJ_G0023553__Tnxb	1808.01	-0.556351	0.235924	-2.35817	0.0183651	0.646592
MGP_BALBcJ_G0024807__Fen1	430.443	0.640045	0.271837	2.35452	0.0185469	0.646592
MGP_BALBcJ_G0026585__Nxt1	215.113	0.373208	0.158311	2.35744	0.0184014	0.646592
MGP_BALBcJ_G0027584__Hist2h4	76.8467	-1.21778	0.517586	-2.35281	0.0186324	0.646592
MGP_BALBcJ_G0028434__Tek	736.047	-0.409137	0.173686	-2.35561	0.0184923	0.646592
MGP_BALBcJ_G0030491__Arf5	1446.49	0.178036	0.0755918	2.35523	0.0185111	0.646592
MGP_BALBcJ_G0031952__Actn4	21802	0.220071	0.0934193	2.35573	0.0184863	0.646592
MGP_BALBcJ_G0032302__Siglech	318.884	-0.915826	0.387448	-2.36374	0.0180916	0.646592
MGP_BALBcJ_G0033065__Rgs10	230.953	-0.730815	0.309506	-2.36123	0.0182144	0.646592
MGP_BALBcJ_G0033380__Kbtbd11	139.669	-0.881961	0.37326	-2.36286	0.0181344	0.646592
MGP_BALBcJ_G0033708__Arrdc2	433.506	0.435943	0.184788	2.35915	0.018317	0.646592
MGP_BALBcJ_G0034680__Rps25	4808.28	0.189379	0.0804013	2.35542	0.0185019	0.646592
MGP_BALBcJ_G0036891__B930095G15Rik	409.711	0.417556	0.177122	2.35745	0.018401	0.646592
MGP_BALBcJ_G0010565__NA	20.4893	-1.06639	0.453595	-2.35098	0.0187239	0.647277
MGP_BALBcJ_G0018773__Fndc8	1.40859	4.06716	1.72984	2.35119	0.0187137	0.647277
MGP_BALBcJ_G0010107__NA	230.985	0.378094	0.161441	2.342	0.0191808	0.64766
MGP_BALBcJ_G0011394__NA	856.375	0.370925	0.158311	2.34301	0.019129	0.64766
MGP_BALBcJ_G0016027__Adam23	194.167	-0.577897	0.246468	-2.34471	0.0190417	0.64766
MGP_BALBcJ_G0018532__Alox15	54.0054	-1.12146	0.478124	-2.34554	0.0189996	0.64766
MGP_BALBcJ_G0020570__Fbxl21	19.7016	1.20515	0.514598	2.34192	0.0191849	0.64766
MGP_BALBcJ_G0022322__Dazap2	7078.13	0.305018	0.130239	2.34198	0.0191818	0.64766
MGP_BALBcJ_G0022424__Slx4	476.052	0.27617	0.117749	2.34541	0.019006	0.64766
MGP_BALBcJ_G0022954__Cldn8	3055.55	-0.392118	0.166904	-2.34936	0.0188056	0.64766
MGP_BALBcJ_G0027193__Spg20	1707.97	-0.195987	0.0835647	-2.34534	0.0190098	0.64766
MGP_BALBcJ_G0028523__NA	3.21404	-3.10562	1.32544	-2.34309	0.0191249	0.64766
MGP_BALBcJ_G0030392__Brca2	99.2089	0.562643	0.240076	2.3436	0.0190987	0.64766
MGP_BALBcJ_G0030420__Slc25a13	623.36	0.295706	0.12606	2.34576	0.0189883	0.64766
MGP_BALBcJ_G0033244__Mrpl23	476.357	0.257797	0.109801	2.34787	0.0188812	0.64766
MGP_BALBcJ_G0035907__Awat2	41.0677	0.665037	0.283009	2.34987	0.0187797	0.64766
MGP_BALBcJ_G0022267__4930415O20Rik	6.00291	-2.16454	0.925116	-2.33975	0.0192969	0.650349
MGP_BALBcJ_G0015799__Pi15	73.6912	-1.00457	0.429688	-2.3379	0.0193924	0.652478
MGP_BALBcJ_G0010665__NA	4.73344	2.96061	1.26837	2.33418	0.0195861	0.652962
MGP_BALBcJ_G0031519__Ttyh1	56.9217	0.805503	0.344727	2.33664	0.0194579	0.652962
MGP_BALBcJ_G0033743__Zfp709	206.411	-0.428859	0.183692	-2.33466	0.0195611	0.652962
MGP_BALBcJ_G0034771__Pou2af1	199.402	-0.880354	0.377204	-2.3339	0.0196012	0.652962
MGP_BALBcJ_G0035150__Il20rb	61.6456	0.634423	0.271674	2.33524	0.0195308	0.652962
MGP_BALBcJ_G0036009__Dach2	8.34195	1.53172	0.656157	2.33437	0.0195761	0.652962
MGP_BALBcJ_G0025405__Tmem203	203.112	0.346058	0.148322	2.33315	0.0196403	0.653186
MGP_BALBcJ_G0025098__Arhgap19	119.974	-0.873534	0.374634	-2.3317	0.0197164	0.654635
MGP_BALBcJ_G0031915__NA	2.03123	-3.69945	1.58702	-2.33106	0.0197501	0.654676
MGP_BALBcJ_G0012937__NA	1563.62	0.211233	0.0906658	2.32979	0.0198171	0.655819
MGP_BALBcJ_G0020201__Stard3nl	497.859	-0.308847	0.132652	-2.32825	0.019899	0.656375
MGP_BALBcJ_G0026603__Cst7	6.74481	-2.12914	0.914361	-2.32856	0.0198825	0.656375
MGP_BALBcJ_G0022066__Cacna1i	5.6069	-4.25568	1.82983	-2.32573	0.0200331	0.65864
MGP_BALBcJ_G0032109__Siglecg	32.3628	-3.19115	1.37183	-2.32619	0.0200085	0.65864
MGP_BALBcJ_G0003870__Gm12530	25.7915	-0.96621	0.416424	-2.32025	0.0203271	0.660036
MGP_BALBcJ_G0018588__P2rx1	21.8109	-1.22524	0.528038	-2.32036	0.0203213	0.660036
MGP_BALBcJ_G0018931__Abi3	225.969	-0.611868	0.263905	-2.31851	0.0204215	0.660036
MGP_BALBcJ_G0021448__Scara5	994.143	1.55913	0.671745	2.32101	0.0202863	0.660036
MGP_BALBcJ_G0023817__Frs3	88.2848	0.588643	0.254136	2.31625	0.0205447	0.660036
MGP_BALBcJ_G0024523__Mbd1	2585.37	0.327125	0.141053	2.31916	0.0203863	0.660036
MGP_BALBcJ_G0026497__Hspa12b	271.326	-0.347326	0.149585	-2.32194	0.0202363	0.660036
MGP_BALBcJ_G0027524__Snx27	1672.39	-0.218203	0.0941581	-2.31741	0.0204813	0.660036
MGP_BALBcJ_G0028543__Btf3l4	1230.28	0.267388	0.11539	2.31725	0.0204904	0.660036
MGP_BALBcJ_G0029493__Hs3st1	68.3072	-0.693785	0.299355	-2.3176	0.0204711	0.660036
MGP_BALBcJ_G0031391__Gpr19	51.3036	0.692302	0.298785	2.31705	0.0205008	0.660036
MGP_BALBcJ_G0031455__Etnk1	2962.68	-0.239975	0.103623	-2.31584	0.0205668	0.660036
MGP_BALBcJ_G0032199__Ccdc155	3.40656	-2.93407	1.26581	-2.31795	0.0204522	0.660036
MGP_BALBcJ_G0036091__D330045A20Rik	4.04238	3.23276	1.3956	2.31639	0.020537	0.660036
MGP_BALBcJ_G0039933__NA	3.70065	-3.36731	1.45146	-2.31995	0.0203437	0.660036
MGP_BALBcJ_G0026193__Prrg4	573.09	-0.468459	0.202397	-2.31456	0.0206372	0.660193
MGP_BALBcJ_G0035130__Copb2	5152.94	-0.146226	0.0631746	-2.31463	0.0206334	0.660193
MGP_BALBcJ_G0006061__Gm17619	34.4061	0.983528	0.427092	2.30285	0.0212874	0.662171
MGP_BALBcJ_G0010798__NA	2.05095	-4.40565	1.91154	-2.30477	0.0211797	0.662171
MGP_BALBcJ_G0017783__Prim1	122.988	0.418186	0.181105	2.30908	0.020939	0.662171
MGP_BALBcJ_G0018458__Per1	982.772	0.763414	0.331135	2.30545	0.0211415	0.662171
MGP_BALBcJ_G0019382__Mxra7	165.617	-0.475339	0.205717	-2.31064	0.0208525	0.662171
MGP_BALBcJ_G0019816__Arg2	625.456	0.805301	0.349163	2.30638	0.0210896	0.662171
MGP_BALBcJ_G0020359__Sox4	8873.91	-0.298262	0.129477	-2.30359	0.0212456	0.662171
MGP_BALBcJ_G0022280__Rhebl1	50.8665	-0.593144	0.257374	-2.3046	0.0211892	0.662171
MGP_BALBcJ_G0023829__Treml2	39.1075	-2.87513	1.24641	-2.30673	0.02107	0.662171
MGP_BALBcJ_G0024147__B4galt6	1972.18	0.549157	0.238121	2.30621	0.0210988	0.662171
MGP_BALBcJ_G0024405__Zfp608	730.136	-0.440951	0.191582	-2.30163	0.0213561	0.662171
MGP_BALBcJ_G0024798__Asrgl1	482.855	0.742676	0.322134	2.30549	0.0211393	0.662171
MGP_BALBcJ_G0025486__Vav2	1917.75	0.431493	0.187264	2.3042	0.0212113	0.662171
MGP_BALBcJ_G0028500__Pcsk9	6.09171	-3.53416	1.53473	-2.30278	0.021291	0.662171
MGP_BALBcJ_G0030160__Pom121	1024.42	0.281474	0.121801	2.31093	0.0208369	0.662171
MGP_BALBcJ_G0030294__Card11	184.483	-1.06942	0.464604	-2.30179	0.021347	0.662171
MGP_BALBcJ_G0030860__Capg	2682.92	0.383355	0.166439	2.30328	0.0212633	0.662171
MGP_BALBcJ_G0032185__Rras	952.256	0.252653	0.109487	2.3076	0.0210215	0.662171
MGP_BALBcJ_G0033304__Cd209b	190.901	-1.19457	0.516796	-2.3115	0.0208055	0.662171
MGP_BALBcJ_G0033817__Adgrl1	347.247	-0.327804	0.142087	-2.30707	0.021051	0.662171
MGP_BALBcJ_G0000095__Igkv1-135	585.081	-0.907156	0.39474	-2.29811	0.0215555	0.663315
MGP_BALBcJ_G0003092__Dnmt3aos	2.72846	3.69934	1.60854	2.29981	0.021459	0.663315
MGP_BALBcJ_G0016726__Kcnj10	258.53	-0.871509	0.37933	-2.2975	0.0215905	0.663315
MGP_BALBcJ_G0017699__Cpm	36.8173	-0.845641	0.368027	-2.29777	0.021575	0.663315
MGP_BALBcJ_G0025500__Gtf3c5	1074.41	0.245695	0.10691	2.29815	0.0215532	0.663315
MGP_BALBcJ_G0031560__NA	59.3421	0.725078	0.315471	2.2984	0.0215391	0.663315
MGP_BALBcJ_G0002740__2810442N19Rik	1.59761	-3.99375	1.73978	-2.29554	0.0217021	0.664013
MGP_BALBcJ_G0007129__Gm28077	87.8786	1.39349	0.607303	2.29455	0.0217591	0.664013
MGP_BALBcJ_G0018223__Tcf7	66.6077	-1.61121	0.702467	-2.29365	0.0218109	0.664013
MGP_BALBcJ_G0027281__Golim4	3836.94	-0.438737	0.19117	-2.29501	0.0217323	0.664013
MGP_BALBcJ_G0029527__Anapc4	1392.89	0.199085	0.0867926	2.2938	0.0218017	0.664013
MGP_BALBcJ_G0033810__Tecr	2759.53	0.321492	0.140081	2.29504	0.0217307	0.664013
MGP_BALBcJ_G0027910__Gbp5	80.9115	-1.04873	0.457745	-2.29108	0.0219588	0.667506
MGP_BALBcJ_G0002396__Trbd1	1.67053	-4.15074	1.8131	-2.28931	0.0220616	0.667841
MGP_BALBcJ_G0016721__Casq1	7.33868	2.11119	0.921954	2.28991	0.0220266	0.667841
MGP_BALBcJ_G0027953__Adgrl4	764.099	-0.352461	0.153969	-2.28918	0.0220692	0.667841
MGP_BALBcJ_G0000048__Ighv5-17	358.804	1.37984	0.603524	2.2863	0.0222366	0.671661
MGP_BALBcJ_G0019708__Mia2	14.4829	1.43854	0.629509	2.28518	0.0223023	0.671661
MGP_BALBcJ_G0030620__Sval2	6.9014	2.90598	1.27191	2.28473	0.0223287	0.671661
MGP_BALBcJ_G0033927__Ogfod1	868.114	-0.222821	0.0974914	-2.28554	0.0222811	0.671661
MGP_BALBcJ_G0031995__Clip3	166.128	-0.518169	0.22695	-2.28318	0.0224197	0.673393
MGP_BALBcJ_G0015673__Gm16096	120.201	0.655804	0.287427	2.28164	0.0225107	0.67416
MGP_BALBcJ_G0035046__Filip1	109.076	-0.465405	0.203981	-2.28161	0.0225121	0.67416
MGP_BALBcJ_G0023920__Trip10	1556.68	0.376018	0.165182	2.27639	0.0228227	0.674441
MGP_BALBcJ_G0023995__Crim1	1100.97	-0.306968	0.134743	-2.27818	0.022716	0.674441
MGP_BALBcJ_G0025794__Hat1	373.372	0.272279	0.119559	2.27735	0.0227651	0.674441
MGP_BALBcJ_G0027214__Med12l	28.1719	-0.868443	0.380965	-2.27959	0.0226322	0.674441
MGP_BALBcJ_G0027994__Rps20	1591.71	0.221089	0.0970808	2.27737	0.0227639	0.674441
MGP_BALBcJ_G0028355__Tnfsf8	34.623	-1.0878	0.477349	-2.27884	0.0226767	0.674441
MGP_BALBcJ_G0028887__Rps6ka1	1168.39	0.283908	0.124478	2.28078	0.0225613	0.674441
MGP_BALBcJ_G0032935__Gga2	1038.36	-0.318779	0.139805	-2.28017	0.0225979	0.674441
MGP_BALBcJ_G0035032__Gsta4	634.014	0.687667	0.302022	2.27687	0.0227937	0.674441
MGP_BALBcJ_G0015747__Sox17	250.853	-0.473098	0.208147	-2.2729	0.023032	0.675352
MGP_BALBcJ_G0015843__Bend6	25.701	-0.867089	0.381724	-2.27151	0.0231163	0.675352
MGP_BALBcJ_G0022023__Sh3bp1	325.92	-0.376807	0.165722	-2.27373	0.0229824	0.675352
MGP_BALBcJ_G0022027__H1f0	1502.36	0.479498	0.211152	2.27087	0.0231551	0.675352
MGP_BALBcJ_G0026519__Gpcpd1	1484.52	0.845252	0.372084	2.27167	0.0231062	0.675352
MGP_BALBcJ_G0031840__Pou2f2	170.129	-0.910638	0.400893	-2.27152	0.0231153	0.675352
MGP_BALBcJ_G0033430__NA	1399.45	0.144123	0.0634515	2.27139	0.0231232	0.675352
MGP_BALBcJ_G0034640__Clmp	375.17	-0.490589	0.215874	-2.27257	0.0230523	0.675352
MGP_BALBcJ_G0035382__Golga4	3908.88	-0.19027	0.0836759	-2.2739	0.0229723	0.675352
MGP_BALBcJ_G0025708__Fmnl2	756.076	-0.426791	0.188059	-2.26945	0.023241	0.675899
MGP_BALBcJ_G0030906__Slc4a5	4.78919	2.43558	1.07301	2.26986	0.023216	0.675899
MGP_BALBcJ_G0004203__Gm42582	1.23987	4.00989	1.77743	2.25601	0.0240699	0.675979
MGP_BALBcJ_G0005477__Gm15325	5.2493	2.04787	0.912298	2.24474	0.0247849	0.675979
MGP_BALBcJ_G0005748__Epb41l4aos	105.084	0.416855	0.185845	2.24302	0.0248953	0.675979
MGP_BALBcJ_G0006213__Gm42743	30.4602	-0.996496	0.440891	-2.26019	0.0238097	0.675979
MGP_BALBcJ_G0006333__4930555A03Rik	8.54306	-1.6263	0.72301	-2.24935	0.0244904	0.675979
MGP_BALBcJ_G0006711__Gm43082	7.21876	1.48628	0.662094	2.24482	0.02478	0.675979
MGP_BALBcJ_G0010082__NA	5.03056	3.48973	1.54438	2.25963	0.0238441	0.675979
MGP_BALBcJ_G0015087__Tug1	2530.68	-0.188506	0.0839355	-2.24585	0.0247139	0.675979
MGP_BALBcJ_G0015844__Dst	10702.5	-0.200766	0.0894406	-2.24469	0.0247883	0.675979
MGP_BALBcJ_G0015894__Rpl31	5404.36	0.151843	0.0673858	2.25334	0.024238	0.675979
MGP_BALBcJ_G0016289__NA	3.00836	-3.16313	1.40308	-2.25443	0.0241694	0.675979
MGP_BALBcJ_G0016899__Hsd11b1	311.558	0.516097	0.229774	2.24611	0.0246969	0.675979
MGP_BALBcJ_G0017742__39873	267.319	-0.277578	0.123761	-2.24285	0.0249066	0.675979
MGP_BALBcJ_G0018172__Flt4	229.722	-0.467577	0.206923	-2.25967	0.023842	0.675979
MGP_BALBcJ_G0018906__Mrpl27	436.251	0.259856	0.115517	2.24951	0.0244798	0.675979
MGP_BALBcJ_G0020715__Pdcd6	1487.9	0.182874	0.0815755	2.24178	0.0249757	0.675979
MGP_BALBcJ_G0020994__Sec24c	3920.74	-0.205372	0.0914666	-2.24533	0.0247473	0.675979
MGP_BALBcJ_G0021626__Farp1	1701.74	0.326744	0.145214	2.25008	0.024444	0.675979
MGP_BALBcJ_G0021634__Tm9sf2	4197.54	-0.19288	0.0858063	-2.24786	0.0245853	0.675979
MGP_BALBcJ_G0021861__Fam49b	1441.03	0.323552	0.14437	2.24113	0.025018	0.675979
MGP_BALBcJ_G0023060__NA	95.8658	-0.755676	0.334077	-2.26198	0.0236985	0.675979
MGP_BALBcJ_G0023755__Hsp90ab1	35553.7	-0.228634	0.101283	-2.25736	0.0239853	0.675979
MGP_BALBcJ_G0023963__Myom1	54.3655	-0.666954	0.296047	-2.25287	0.0242676	0.675979
MGP_BALBcJ_G0023986__Spast	1452.85	-0.190425	0.0848991	-2.24295	0.0248998	0.675979
MGP_BALBcJ_G0024414__Prrc1	1275.32	-0.281368	0.125001	-2.25092	0.0243907	0.675979
MGP_BALBcJ_G0025088__Blnk	240.163	-0.79802	0.352572	-2.26342	0.0236096	0.675979
MGP_BALBcJ_G0025224__Adra2a	15.9614	-1.08034	0.4771	-2.26438	0.0235508	0.675979
MGP_BALBcJ_G0025687__Arhgap15	78.3004	-1.0089	0.44932	-2.2454	0.0247424	0.675979
MGP_BALBcJ_G0026173__Elf5	16239.1	0.394907	0.174191	2.26709	0.0233847	0.675979
MGP_BALBcJ_G0026294__Plcb2	234.552	-0.858089	0.379666	-2.26011	0.0238142	0.675979
MGP_BALBcJ_G0028354__Tnfsf15	2.66596	-2.98946	1.33394	-2.24107	0.0250214	0.675979
MGP_BALBcJ_G0029047__Tmem51	461.349	0.297307	0.131597	2.25922	0.0238695	0.675979
MGP_BALBcJ_G0029345__Insig1	743.662	-0.595392	0.265613	-2.24158	0.0249886	0.675979
MGP_BALBcJ_G0029496__Bod1l	1920.94	-0.162172	0.0716264	-2.26413	0.023566	0.675979
MGP_BALBcJ_G0029864__Fbrsl1	2196.91	0.299983	0.132434	2.26515	0.0235036	0.675979
MGP_BALBcJ_G0029908__Ung	319.411	-0.372184	0.1651	-2.25429	0.0241778	0.675979
MGP_BALBcJ_G0030565__D630045J12Rik	74.361	1.09944	0.48646	2.26009	0.0238156	0.675979
MGP_BALBcJ_G0031141__Plxnd1	970.699	-0.485969	0.216421	-2.24548	0.0247374	0.675979
MGP_BALBcJ_G0031453__St8sia1	9.85172	-2.23767	0.990964	-2.25807	0.023941	0.675979
MGP_BALBcJ_G0031812__Smg9	583.434	0.281392	0.125557	2.24115	0.0250165	0.675979
MGP_BALBcJ_G0031954__Map4k1	127.902	-0.816395	0.363116	-2.24831	0.0245567	0.675979
MGP_BALBcJ_G0031991__Polr2i	347.114	0.338612	0.15013	2.25546	0.0241047	0.675979
MGP_BALBcJ_G0032025__Tmem147	1261.13	0.235774	0.105033	2.24477	0.0247827	0.675979
MGP_BALBcJ_G0032044__Fxyd3	5699.46	0.324252	0.14455	2.24318	0.0248852	0.675979
MGP_BALBcJ_G0032474__Nox4	197.806	-0.677545	0.299874	-2.25943	0.0238566	0.675979
MGP_BALBcJ_G0032950__Lcmt1	333.684	0.325625	0.144096	2.25977	0.0238356	0.675979
MGP_BALBcJ_G0033048__Kat8	379.926	-0.339089	0.151215	-2.24243	0.0249333	0.675979
MGP_BALBcJ_G0033952__Adgrg3	153.15	0.546851	0.241141	2.26776	0.0233435	0.675979
MGP_BALBcJ_G0034211__Acsf3	588.778	0.363745	0.162188	2.24273	0.0249141	0.675979
MGP_BALBcJ_G0035279__Dalrd3	1245.86	-0.212752	0.0938084	-2.26794	0.023333	0.675979
MGP_BALBcJ_G0035327__Nradd	259.696	0.537126	0.237724	2.25945	0.0238554	0.675979
MGP_BALBcJ_G0035422__Sec22c	422.601	-0.283082	0.12603	-2.24615	0.0246946	0.675979
MGP_BALBcJ_G0035566__Usp11	137.344	-0.555826	0.247808	-2.24297	0.0248986	0.675979
MGP_BALBcJ_G0025262__Fam204a	218.22	0.349325	0.155983	2.23951	0.0251228	0.67781
MGP_BALBcJ_G0017401__Palm	340.771	-0.353718	0.158052	-2.23798	0.0252225	0.678683
MGP_BALBcJ_G0032218__Nucb1	3018.5	-0.256115	0.114425	-2.23828	0.0252026	0.678683
MGP_BALBcJ_G0000142__Igkv6-20	134.672	-1.95593	0.87815	-2.22733	0.025925	0.67882
MGP_BALBcJ_G0000293__NA	50.945	0.600771	0.270303	2.22258	0.0262441	0.67882
MGP_BALBcJ_G0006124__Gm38509	54.3707	0.876312	0.394763	2.21985	0.0264292	0.67882
MGP_BALBcJ_G0007323__2010110E17Rik	1.29672	-3.92937	1.77559	-2.21299	0.0268982	0.67882
MGP_BALBcJ_G0015490__Gm11240	5.43073	2.05044	0.920626	2.22722	0.0259325	0.67882
MGP_BALBcJ_G0015710__Gm14634	13.4533	1.1735	0.528921	2.21866	0.0265098	0.67882
MGP_BALBcJ_G0015893__Npas2	546.075	0.807691	0.365447	2.21015	0.027095	0.67882
MGP_BALBcJ_G0016149__Dock10	655.563	-0.736267	0.331073	-2.22388	0.0261566	0.67882
MGP_BALBcJ_G0016629__Xcl1	14.2059	-1.38744	0.624757	-2.22077	0.0263664	0.67882
MGP_BALBcJ_G0016701__Arhgap30	726.296	-0.800836	0.358337	-2.23487	0.0254259	0.67882
MGP_BALBcJ_G0018279__Sap30l	384.229	0.291673	0.131838	2.21235	0.0269425	0.67882
MGP_BALBcJ_G0018684__Efcab5	21.1807	-0.897755	0.406255	-2.20983	0.0271168	0.67882
MGP_BALBcJ_G0018709__Proca1	94.7413	0.471256	0.212769	2.21487	0.0267691	0.67882
MGP_BALBcJ_G0019000__Erbb2	1577.15	0.316964	0.143217	2.21317	0.0268859	0.67882
MGP_BALBcJ_G0019024__Tns4	567.198	-0.458095	0.205549	-2.22864	0.0258379	0.67882
MGP_BALBcJ_G0019325__Hid1	2432.38	-0.244291	0.109843	-2.22401	0.0261481	0.67882
MGP_BALBcJ_G0019799__Sptb	1825.24	0.535241	0.242148	2.21039	0.0270779	0.67882
MGP_BALBcJ_G0020129__Itgb8	1986.69	-0.504405	0.227226	-2.21984	0.0264296	0.67882
MGP_BALBcJ_G0020455__Dtnbp1	962.238	0.267685	0.12111	2.21026	0.0270868	0.67882
MGP_BALBcJ_G0020766__Fam151b	87.5624	0.593971	0.26806	2.21581	0.0267043	0.67882
MGP_BALBcJ_G0021547__Lacc1	129.19	-0.620005	0.280355	-2.2115	0.0270011	0.67882
MGP_BALBcJ_G0021986__Mb	310.674	0.834072	0.375739	2.21982	0.0264311	0.67882
MGP_BALBcJ_G0022323__Smagp	634.277	0.336818	0.1523	2.21155	0.0269979	0.67882
MGP_BALBcJ_G0022786__Arhgap31	864.079	-0.300824	0.136028	-2.21149	0.0270019	0.67882
MGP_BALBcJ_G0022901__Crybg3	1080.24	0.309224	0.138842	2.22717	0.0259359	0.67882
MGP_BALBcJ_G0023185__Ppp2r1a	4030.4	0.170541	0.0762593	2.23633	0.0253305	0.67882
MGP_BALBcJ_G0023821__Foxp4	1595.43	0.331484	0.14928	2.22056	0.0263809	0.67882
MGP_BALBcJ_G0024303__Pcdhgb1	24.8278	0.981913	0.440786	2.22764	0.0259045	0.67882
MGP_BALBcJ_G0024771__Slc3a2	18469.2	0.453022	0.20512	2.20857	0.0272048	0.67882
MGP_BALBcJ_G0024789__Ganab	7017.89	-0.174598	0.0787774	-2.21635	0.0266676	0.67882
MGP_BALBcJ_G0025037__Ifit1bl2	25.1321	-1.1302	0.505227	-2.23702	0.0252848	0.67882
MGP_BALBcJ_G0025404__Ndor1	1852.56	0.220261	0.0996787	2.20972	0.0271249	0.67882
MGP_BALBcJ_G0025410__Lrrc26	147.203	0.983451	0.440027	2.23498	0.0254187	0.67882
MGP_BALBcJ_G0026857__Pcif1	1339.95	0.387914	0.175002	2.21662	0.0266489	0.67882
MGP_BALBcJ_G0026942__Nelfcd	598.432	0.230299	0.103212	2.23133	0.0256592	0.67882
MGP_BALBcJ_G0027104__Cldn11	5.94886	-3.97909	1.7922	-2.22023	0.0264034	0.67882
MGP_BALBcJ_G0027420__She	215.935	-0.402357	0.181284	-2.21949	0.0264536	0.67882
MGP_BALBcJ_G0028362__Cdk5rap2	1440.21	-0.350139	0.157218	-2.2271	0.0259408	0.67882
MGP_BALBcJ_G0028794__Tmem54	45.272	0.799841	0.359321	2.22598	0.0260157	0.67882
MGP_BALBcJ_G0028800__Sync	304.007	0.727692	0.329415	2.20904	0.0271716	0.67882
MGP_BALBcJ_G0028871__Map3k6	529.946	0.779797	0.351691	2.21728	0.0266043	0.67882
MGP_BALBcJ_G0029518__Adgra3	2297.7	-0.291984	0.131896	-2.21375	0.0268462	0.67882
MGP_BALBcJ_G0029616__Kdr	1146.34	-0.418573	0.189453	-2.20938	0.0271485	0.67882
MGP_BALBcJ_G0030797__Herc3	591.087	0.391901	0.176306	2.22284	0.0262266	0.67882
MGP_BALBcJ_G0031187__Cecr2	574.917	0.378818	0.169569	2.23401	0.0254824	0.67882
MGP_BALBcJ_G0031239__Phb2	2143.9	0.185877	0.083767	2.21898	0.026488	0.67882
MGP_BALBcJ_G0031244__Eno2	123.689	-0.569044	0.254847	-2.23288	0.0255569	0.67882
MGP_BALBcJ_G0031317__Klrb1f	7.11874	-2.16162	0.969958	-2.22857	0.0258423	0.67882
MGP_BALBcJ_G0031846__Pafah1b3	539.953	0.351853	0.158757	2.2163	0.0266707	0.67882
MGP_BALBcJ_G0032307__Herc2	3587.44	-0.15039	0.067882	-2.21546	0.0267283	0.67882
MGP_BALBcJ_G0033379__Arhgef10	353.839	-0.312224	0.14101	-2.21419	0.0268158	0.67882
MGP_BALBcJ_G0033798__Inpp4b	123.53	-0.592993	0.268514	-2.20842	0.0272148	0.67882
MGP_BALBcJ_G0033827__Gm10643	18.9513	1.07108	0.481621	2.22391	0.0261542	0.67882
MGP_BALBcJ_G0034010__Exoc3l	61.8205	-0.574184	0.257996	-2.22555	0.0260441	0.67882
MGP_BALBcJ_G0034324__Piwil4	5.61199	-1.80647	0.812776	-2.22259	0.0262432	0.67882
MGP_BALBcJ_G0034343__Chordc1	1367.91	-0.332608	0.149679	-2.22214	0.0262736	0.67882
MGP_BALBcJ_G0035377__Rbms3	427.523	-0.347848	0.156206	-2.22686	0.0259567	0.67882
MGP_BALBcJ_G0036174__Sat1	9311.86	0.427309	0.191092	2.23614	0.0253427	0.67882
MGP_BALBcJ_G0036901__Gm16310	155.521	-0.654309	0.294772	-2.21971	0.0264386	0.67882
MGP_BALBcJ_G0000985__NA	3.88732	-2.36213	1.07058	-2.20641	0.0273554	0.679802
MGP_BALBcJ_G0028943__Id3	273.404	-0.46564	0.211004	-2.20678	0.0273294	0.679802
MGP_BALBcJ_G0034737__Zbtb16	497.453	2.45512	1.11269	2.20648	0.0273505	0.679802
MGP_BALBcJ_G0021823__Mrpl13	502.423	0.30855	0.13991	2.20535	0.0274297	0.68057
MGP_BALBcJ_G0022053__Nptxr	66.1258	0.789423	0.358014	2.205	0.0274538	0.68057
MGP_BALBcJ_G0029766__Hpse	120.038	-0.857038	0.388776	-2.20445	0.0274924	0.680691
MGP_BALBcJ_G0026496__Siglec1	1217.61	-0.813732	0.369328	-2.20327	0.0275754	0.681326
MGP_BALBcJ_G0034331__Panx1	350.908	0.287515	0.130503	2.20313	0.0275857	0.681326
MGP_BALBcJ_G0034083__Pkd1l3	12.3332	-1.36259	0.618793	-2.20202	0.027664	0.682424
MGP_BALBcJ_G0023741__Cyp39a1	649.406	0.772608	0.351014	2.20107	0.0277309	0.682431
MGP_BALBcJ_G0030566__Zc3hav1l	69.528	-0.78633	0.357251	-2.20106	0.027732	0.682431
MGP_BALBcJ_G0005620__Gm26569	2.6779	3.46786	1.57772	2.19802	0.0279476	0.68273
MGP_BALBcJ_G0015857__Neurl3	309.071	-0.621026	0.282739	-2.19647	0.0280585	0.68273
MGP_BALBcJ_G0017076__Fam26f	17.8039	-1.36278	0.61998	-2.19811	0.0279413	0.68273
MGP_BALBcJ_G0019703__Clec14a	183.1	-0.531114	0.24158	-2.1985	0.0279132	0.68273
MGP_BALBcJ_G0021828__Zhx2	367.578	-0.442697	0.20136	-2.19854	0.0279106	0.68273
MGP_BALBcJ_G0023636__Rpp21	326.468	0.303763	0.138318	2.19613	0.0280829	0.68273
MGP_BALBcJ_G0027833__Zgrf1	54.6622	0.577003	0.262524	2.19791	0.0279557	0.68273
MGP_BALBcJ_G0031041__A730049H05Rik	2.53275	3.78938	1.72274	2.19962	0.0278342	0.68273
MGP_BALBcJ_G0031841__Dedd2	1014.39	0.349177	0.158966	2.19656	0.028052	0.68273
MGP_BALBcJ_G0034418__Ap1m2	970.016	0.604444	0.275111	2.19709	0.0280142	0.68273
MGP_BALBcJ_G0000008__Ighg3	16.2186	-2.26102	1.03675	-2.18087	0.0291934	0.687064
MGP_BALBcJ_G0007370__Gm27030	5.75266	2.47176	1.13041	2.1866	0.0287716	0.687064
MGP_BALBcJ_G0008187__Mirlet7b	9.2601	2.05831	0.943337	2.18195	0.0291134	0.687064
MGP_BALBcJ_G0015451__Gm20627	37.9536	-1.09564	0.502329	-2.18113	0.029174	0.687064
MGP_BALBcJ_G0016209__Dgkd	2423.33	-0.294229	0.134261	-2.19147	0.0284181	0.687064
MGP_BALBcJ_G0016397__Fam72a	14.9113	1.25618	0.57576	2.18178	0.0291255	0.687064
MGP_BALBcJ_G0017817__Cdk2	606.058	0.197386	0.0900739	2.19138	0.0284241	0.687064
MGP_BALBcJ_G0018000__C1d	595.02	0.2094	0.0957539	2.18686	0.0287527	0.687064
MGP_BALBcJ_G0018173__Scgb3a1	16.2885	-1.94517	0.889849	-2.18596	0.0288188	0.687064
MGP_BALBcJ_G0018505__Acap1	106.493	-1.85352	0.848396	-2.18474	0.0289079	0.687064
MGP_BALBcJ_G0019243__Smarcd2	2334.76	0.385193	0.175878	2.19011	0.0285161	0.687064
MGP_BALBcJ_G0023964__Lpin2	644.217	-0.416618	0.190457	-2.18747	0.0287084	0.687064
MGP_BALBcJ_G0024557__Txnl4a	527.68	-0.414537	0.189692	-2.18531	0.0288658	0.687064
MGP_BALBcJ_G0025173__Gbf1	2566.13	-0.245713	0.112508	-2.18397	0.0289648	0.687064
MGP_BALBcJ_G0025230__Vti1a	863.142	0.215315	0.0987386	2.18066	0.0292085	0.687064
MGP_BALBcJ_G0025521__Gle1	1299.82	-0.228857	0.104868	-2.18234	0.0290841	0.687064
MGP_BALBcJ_G0025892__Tnks1bp1	2282.77	0.236798	0.10831	2.1863	0.0287936	0.687064
MGP_BALBcJ_G0027313__Trim2	1698.59	0.427589	0.196091	2.18056	0.0292157	0.687064
MGP_BALBcJ_G0028399__Mllt3	512.891	-0.367947	0.168331	-2.18585	0.0288265	0.687064
MGP_BALBcJ_G0033573__Stox2	784.643	-0.326782	0.149597	-2.18442	0.0289312	0.687064
MGP_BALBcJ_G0033949__Ccdc102a	97.6533	-0.429008	0.19668	-2.18125	0.0291649	0.687064
MGP_BALBcJ_G0034117__Zfp1	221.458	0.352889	0.161731	2.18195	0.0291133	0.687064
MGP_BALBcJ_G0034332__Hephl1	1083.52	-0.61542	0.28136	-2.18731	0.0287203	0.687064
MGP_BALBcJ_G0034408__Fdx1l	375.749	0.268484	0.122888	2.18478	0.0289049	0.687064
MGP_BALBcJ_G0034694__Atp5l	2654.77	0.167257	0.0765959	2.18363	0.0289895	0.687064
MGP_BALBcJ_G0034788__Rab39	17.5323	-1.18655	0.541756	-2.1902	0.0285096	0.687064
MGP_BALBcJ_G0035409__Rpsa	11543.1	0.164587	0.0752156	2.1882	0.0286552	0.687064
MGP_BALBcJ_G0035521__B630019K06Rik	59.9608	-0.685794	0.312705	-2.1931	0.0283002	0.687064
MGP_BALBcJ_G0004036__Gm7854	1.84497	3.6494	1.67492	2.17885	0.0293429	0.688447
MGP_BALBcJ_G0025866__Fam171b	23.6278	-1.05956	0.486243	-2.17908	0.0293257	0.688447
MGP_BALBcJ_G0015267__Gm15964	11.3331	-1.59084	0.73103	-2.17617	0.0295427	0.691971
MGP_BALBcJ_G0016469__Csrp1	8090.96	0.179765	0.082661	2.17473	0.0296506	0.691971
MGP_BALBcJ_G0018922__Fam117a	218.769	-0.449172	0.206558	-2.17455	0.0296636	0.691971
MGP_BALBcJ_G0027421__Il6ra	3952.81	-0.514698	0.236706	-2.17442	0.0296736	0.691971
MGP_BALBcJ_G0030675__Sspo	28.2573	-0.815153	0.374941	-2.17408	0.029699	0.691971
MGP_BALBcJ_G0034123__Tmem231	214.874	-0.396287	0.182223	-2.17473	0.0296504	0.691971
MGP_BALBcJ_G0005013__Gm38293	3.17212	2.584	1.18917	2.17294	0.0297852	0.692015
MGP_BALBcJ_G0016782__Sdccag8	230.796	-0.346844	0.159576	-2.17353	0.0297402	0.692015
MGP_BALBcJ_G0017094__Mfsd4b4	424.199	0.421925	0.194201	2.17262	0.0298088	0.692015
MGP_BALBcJ_G0024417__Slc12a2	7977.26	-0.379742	0.17489	-2.17132	0.029907	0.692015
MGP_BALBcJ_G0027624__Zfp697	120.318	-0.564366	0.259887	-2.17159	0.0298869	0.692015
MGP_BALBcJ_G0032423__Whamm	719.61	0.292908	0.134887	2.17151	0.0298928	0.692015
MGP_BALBcJ_G0010693__NA	67.1919	-0.921003	0.424621	-2.169	0.0300827	0.692314
MGP_BALBcJ_G0015188__9330162012Rik	34.4025	0.756524	0.348809	2.16888	0.0300919	0.692314
MGP_BALBcJ_G0017498__Smim24	30.6688	-0.920436	0.424063	-2.17052	0.0299677	0.692314
MGP_BALBcJ_G0019352__Galk1	353.65	0.341983	0.157666	2.16904	0.0300799	0.692314
MGP_BALBcJ_G0027208__Serp1	8105.04	-0.346581	0.159831	-2.16843	0.030126	0.692314
MGP_BALBcJ_G0027265__Trim59	74.9056	-0.6494	0.299379	-2.16916	0.0300706	0.692314
MGP_BALBcJ_G0024890__Lpxn	113.243	-0.800539	0.369309	-2.16767	0.0301838	0.692853
MGP_BALBcJ_G0018185__Canx	10850	-0.299198	0.138307	-2.16328	0.0305193	0.696729
MGP_BALBcJ_G0018324__Hist3h2a	444.628	-0.355747	0.164454	-2.1632	0.0305255	0.696729
MGP_BALBcJ_G0024636__Sptbn2	1143.03	0.369193	0.170575	2.1644	0.0304334	0.696729
MGP_BALBcJ_G0031416__Rerg	14.7553	-1.43548	0.663057	-2.16495	0.0303916	0.696729
MGP_BALBcJ_G0032162__Kcnc3	101.716	-0.438194	0.202546	-2.16343	0.0305079	0.696729
MGP_BALBcJ_G0000101__Igkv14-126	351.885	-3.30633	1.52921	-2.16211	0.0306098	0.697305
MGP_BALBcJ_G0021797__Eny2	958.185	0.212968	0.0985267	2.16153	0.0306546	0.697305
MGP_BALBcJ_G0035197__Tlr9	117.231	-0.783693	0.362509	-2.16186	0.0306291	0.697305
MGP_BALBcJ_G0031096__Brpf1	1557.05	0.283182	0.13109	2.16021	0.0307564	0.698832
MGP_BALBcJ_G0001285__NA	24.9025	-1.07011	0.49612	-2.15696	0.0310087	0.699328
MGP_BALBcJ_G0005428__6720427I07Rik	216.65	0.587987	0.272889	2.15467	0.0311877	0.699328
MGP_BALBcJ_G0015473__A530072M11Rik	5.57303	-2.22885	1.03487	-2.15374	0.0312606	0.699328
MGP_BALBcJ_G0015828__Lmbrd1	1885.3	0.256095	0.118665	2.15814	0.0309171	0.699328
MGP_BALBcJ_G0016565__Axdnd1	6.85449	1.5841	0.735337	2.15424	0.0312211	0.699328
MGP_BALBcJ_G0023735__Adgrf5	2987.59	-0.242065	0.112369	-2.15419	0.0312249	0.699328
MGP_BALBcJ_G0023874__Plin5	55.0813	0.823729	0.382376	2.15424	0.0312217	0.699328
MGP_BALBcJ_G0028239__Trim14	165.435	0.386089	0.179074	2.15602	0.0310817	0.699328
MGP_BALBcJ_G0028628__Rps8	8352.08	0.145316	0.0674295	2.15508	0.0311555	0.699328
MGP_BALBcJ_G0031289__Fgf23	5.22602	3.41252	1.58439	2.15383	0.0312532	0.699328
MGP_BALBcJ_G0031834__Cd79a	122.961	-1.69888	0.787169	-2.15821	0.0309112	0.699328
MGP_BALBcJ_G0033176__Scgb1c1	1.13769	-3.77252	1.75165	-2.1537	0.031264	0.699328
MGP_BALBcJ_G0034059__Cdh1	9595.2	0.254301	0.118069	2.15383	0.0312535	0.699328
MGP_BALBcJ_G0035702__Zfp449	64.0492	-0.655478	0.304157	-2.15507	0.0311567	0.699328
MGP_BALBcJ_G0019534__Ttc32	146.178	-0.350089	0.162593	-2.15316	0.0313058	0.699372
MGP_BALBcJ_G0028320__Snx30	1007.85	-0.236776	0.109986	-2.15279	0.0313354	0.699372
MGP_BALBcJ_G0002992__Brip1os	1044.02	-0.200794	0.093397	-2.1499	0.0315632	0.699719
MGP_BALBcJ_G0012280__NA	80.576	-0.935607	0.436754	-2.14218	0.0321789	0.699719
MGP_BALBcJ_G0015422__5430405H02Rik	126.055	0.406949	0.190128	2.14039	0.032323	0.699719
MGP_BALBcJ_G0016120__Ptprn	3.14847	3.21302	1.50025	2.14165	0.0322214	0.699719
MGP_BALBcJ_G0016508__Rgs2	338.843	-0.563649	0.26311	-2.14225	0.032173	0.699719
MGP_BALBcJ_G0017193__P4ha1	542.112	-0.572084	0.266363	-2.14776	0.0317327	0.699719
MGP_BALBcJ_G0018048__Mtif2	697.94	-0.191858	0.0894813	-2.14412	0.0320236	0.699719
MGP_BALBcJ_G0019277__Arsg	219.255	0.470309	0.219067	2.14687	0.0318038	0.699719
MGP_BALBcJ_G0020090__Kif26a	158.236	-0.529116	0.246145	-2.14961	0.0315857	0.699719
MGP_BALBcJ_G0020478__Fam120a	6027.77	-0.200754	0.0937451	-2.14149	0.0322343	0.699719
MGP_BALBcJ_G0021326__Tinf2	476.466	0.28769	0.133729	2.15129	0.0314536	0.699719
MGP_BALBcJ_G0023783__Ptk7	2658.14	0.153833	0.0717934	2.14272	0.0321357	0.699719
MGP_BALBcJ_G0024136__Cdh2	40.8706	-0.8117	0.379148	-2.14085	0.0322859	0.699719
MGP_BALBcJ_G0025390__Pnpla7	4140.71	-0.252924	0.118064	-2.14225	0.0321732	0.699719
MGP_BALBcJ_G0025824__Hoxd4	31.0991	-0.753385	0.351965	-2.14051	0.0323136	0.699719
MGP_BALBcJ_G0026823__Slpi	6533.52	-0.627177	0.292112	-2.14704	0.0317898	0.699719
MGP_BALBcJ_G0028396__Rps6	7472.34	0.151849	0.0706505	2.1493	0.0316105	0.699719
MGP_BALBcJ_G0030295__Sdk1	213.931	-0.448224	0.208811	-2.14655	0.0318291	0.699719
MGP_BALBcJ_G0030306__Fscn1	406.814	-0.464735	0.216323	-2.14834	0.0316869	0.699719
MGP_BALBcJ_G0030999__Chchd6	123.258	0.494025	0.230516	2.14313	0.032103	0.699719
MGP_BALBcJ_G0033076__Tacc2	3334.74	1.24313	0.579714	2.14439	0.0320017	0.699719
MGP_BALBcJ_G0033603__Galnt7	1619.89	-0.338823	0.158037	-2.14395	0.0320372	0.699719
MGP_BALBcJ_G0034006__Fbxl8	94.491	0.458338	0.213498	2.1468	0.0318091	0.699719
MGP_BALBcJ_G0034454__Anln	185.32	0.76231	0.354885	2.14805	0.0317099	0.699719
MGP_BALBcJ_G0035069__Snap91	2.09025	-3.78208	1.76493	-2.1429	0.032121	0.699719
MGP_BALBcJ_G0036050__Armcx2	199.743	-0.650855	0.303295	-2.14595	0.0318771	0.699719
MGP_BALBcJ_G0036228__Ofd1	378.422	0.268175	0.124932	2.14657	0.0318272	0.699719
MGP_BALBcJ_G0036231__Tceanc	146.601	0.488377	0.228108	2.14099	0.0322747	0.699719
MGP_BALBcJ_G0015945__Stat1	518.328	-0.352699	0.164823	-2.13987	0.0323654	0.699885
MGP_BALBcJ_G0003824__Gm43573	7.43405	-1.50041	0.701457	-2.139	0.0324358	0.70044
MGP_BALBcJ_G0024325__Arap3	796.75	-0.387767	0.18131	-2.13869	0.0324606	0.70044
MGP_BALBcJ_G0015407__Gm14022	24.0256	-0.894549	0.418357	-2.13824	0.0324971	0.700478
MGP_BALBcJ_G0027733__Gstm2	421.894	0.44205	0.206778	2.1378	0.0325328	0.700497
MGP_BALBcJ_G0028935__Cnr2	46.284	-1.23555	0.578215	-2.13683	0.0326116	0.701444
MGP_BALBcJ_G0023328__Msln	2.21682	3.49072	1.63489	2.13514	0.0327497	0.702916
MGP_BALBcJ_G0034707__Il10ra	504.342	-0.676632	0.316878	-2.1353	0.0327362	0.702916
MGP_BALBcJ_G0030673__Krba1	880.806	0.272234	0.127533	2.13461	0.0327929	0.703094
MGP_BALBcJ_G0030691__Gimap1	49.2487	-1.03876	0.48685	-2.13364	0.0328723	0.703377
MGP_BALBcJ_G0033913__Capns2	9.49598	1.88034	0.881303	2.1336	0.0328759	0.703377
MGP_BALBcJ_G0005364__Gm16087	2.1336	3.66347	1.71765	2.13284	0.0329376	0.703949
MGP_BALBcJ_G0005270__Gm11685	2.13474	-3.34089	1.56791	-2.13079	0.0331067	0.704441
MGP_BALBcJ_G0017123__Lace1	376.482	-0.390314	0.183182	-2.13075	0.03311	0.704441
MGP_BALBcJ_G0026614__Nsfl1c	1788.2	0.208127	0.0977113	2.13002	0.0331703	0.704441
MGP_BALBcJ_G0030044__Wdr66	97.0998	-0.44815	0.210341	-2.13059	0.0331231	0.704441
MGP_BALBcJ_G0034035__Cenpt	252.068	0.343039	0.161043	2.13011	0.0331625	0.704441
MGP_BALBcJ_G0036966__Gm43696	7.03278	-1.78987	0.840035	-2.1307	0.0331135	0.704441
MGP_BALBcJ_G0029924__2610524H06Rik	49.8318	0.630851	0.296316	2.12898	0.033256	0.705517
MGP_BALBcJ_G0023312__Ube2i	3149.71	0.304644	0.143273	2.12632	0.033477	0.70665
MGP_BALBcJ_G0024137__Dsc3	23.083	-2.36443	1.11184	-2.12659	0.0334543	0.70665
MGP_BALBcJ_G0027981__Zranb2	2509.1	-0.188269	0.0885164	-2.12695	0.0334246	0.70665
MGP_BALBcJ_G0028334__Wdr31	63.0953	0.701836	0.330002	2.12677	0.0334396	0.70665
MGP_BALBcJ_G0030830__Eif2ak3	1503.51	-0.232375	0.10929	-2.12622	0.0334847	0.70665
MGP_BALBcJ_G0028529__Podn	387.422	-0.591583	0.278504	-2.12415	0.0336577	0.709559
MGP_BALBcJ_G0017812__Erbb3	7392.54	0.51773	0.243785	2.12371	0.033694	0.709582
MGP_BALBcJ_G0035924__Il2rg	127.926	-0.93738	0.441836	-2.12156	0.0338751	0.71265
MGP_BALBcJ_G0025366__Pdss1	94.0525	0.402424	0.189756	2.12074	0.0339436	0.712802
MGP_BALBcJ_G0034862__Loxl1	966.763	-0.542967	0.25604	-2.12063	0.0339531	0.712802
MGP_BALBcJ_G0016264__Ankmy1	13.337	0.982156	0.463674	2.11821	0.0341576	0.714204
MGP_BALBcJ_G0021672__Nup155	675.004	0.27455	0.129547	2.1193	0.0340648	0.714204
MGP_BALBcJ_G0021969__Tonsl	2005.98	0.218174	0.103002	2.11816	0.0341616	0.714204
MGP_BALBcJ_G0022941__App	15471	-0.136233	0.0643017	-2.11865	0.0341197	0.714204
MGP_BALBcJ_G0001641__NA	10.8879	1.29775	0.61285	2.11756	0.0342124	0.714525
MGP_BALBcJ_G0021232__Rnase6	31.5613	-0.998375	0.471874	-2.11577	0.0343645	0.716229
MGP_BALBcJ_G0028861__Rpa2	193.307	0.369141	0.174617	2.11401	0.0345143	0.716229
MGP_BALBcJ_G0029548__Tmem156	16.776	-1.39053	0.657276	-2.1156	0.0343789	0.716229
MGP_BALBcJ_G0030728__Hoxa9	50.5035	-0.748698	0.35402	-2.11484	0.0344432	0.716229
MGP_BALBcJ_G0033901__Tox3	11.8961	1.47669	0.698427	2.11431	0.034489	0.716229
MGP_BALBcJ_G0035526__Cybb	1279.52	-0.552471	0.261224	-2.11493	0.0344358	0.716229
MGP_BALBcJ_G0035657__Sash3	217.614	-0.827772	0.391626	-2.11368	0.0345427	0.716229
MGP_BALBcJ_G0002821__Gm26947	19.2605	-0.958208	0.453764	-2.11169	0.0347132	0.716892
MGP_BALBcJ_G0016488__Ptprc	1443.95	-1.11969	0.530237	-2.11168	0.0347142	0.716892
MGP_BALBcJ_G0017610__Gm9847	574.767	-0.499734	0.236656	-2.11164	0.034717	0.716892
MGP_BALBcJ_G0026153__Alkbh3	546.904	0.257114	0.12169	2.11286	0.0346126	0.716892
MGP_BALBcJ_G0026509__Erv3	2.36244	3.24772	1.53857	2.11088	0.034783	0.716907
MGP_BALBcJ_G0032268__Uevld	737.293	0.25593	0.121247	2.11081	0.0347889	0.716907
MGP_BALBcJ_G0020283__Zfp322a	581.924	-0.240159	0.113858	-2.10928	0.0349207	0.718155
MGP_BALBcJ_G0022070__Tnrc6b	2695.34	-0.189401	0.0897776	-2.10967	0.0348871	0.718155
MGP_BALBcJ_G0029604__Lrrc66	1.62768	3.80774	1.80606	2.10832	0.0350033	0.719119
MGP_BALBcJ_G0005678__Gm20109	1.9443	3.70955	1.76278	2.10437	0.0353464	0.722486
MGP_BALBcJ_G0006247__Gm9889	6.5894	1.6283	0.773258	2.10576	0.0352252	0.722486
MGP_BALBcJ_G0010627__NA	1.52125	-3.8212	1.81537	-2.10492	0.0352986	0.722486
MGP_BALBcJ_G0018805__Dusp14	114.122	0.588736	0.279727	2.10468	0.0353192	0.722486
MGP_BALBcJ_G0036904__Gm26575	1.59332	3.28666	1.56116	2.10527	0.0352678	0.722486
MGP_BALBcJ_G0000687__NA	3.32212	-1.95774	0.938561	-2.0859	0.0369878	0.72299
MGP_BALBcJ_G0001787__NA	5.15978	-1.91896	0.916359	-2.09411	0.03625	0.72299
MGP_BALBcJ_G0003755__A730011C13Rik	65.6771	0.526114	0.25213	2.08667	0.0369175	0.72299
MGP_BALBcJ_G0005240__Mir142hg	63.8457	-1.35244	0.647668	-2.08817	0.0367829	0.72299
MGP_BALBcJ_G0005469__NA	14.6412	-0.983302	0.470788	-2.08863	0.0367412	0.72299
MGP_BALBcJ_G0008972__Mir7054	1.24314	-3.97417	1.89926	-2.09248	0.0363955	0.72299
MGP_BALBcJ_G0011915__NA	5.88662	1.64316	0.783809	2.09638	0.0360488	0.72299
MGP_BALBcJ_G0012875__NA	32.9691	0.639182	0.305814	2.0901	0.036609	0.72299
MGP_BALBcJ_G0014364__NA	2.63179	3.23446	1.54868	2.08852	0.0367508	0.72299
MGP_BALBcJ_G0016205__Neu2	14.9759	1.2514	0.601523	2.08038	0.0374902	0.72299
MGP_BALBcJ_G0016620__Sell	233.203	-2.55423	1.21797	-2.09713	0.0359824	0.72299
MGP_BALBcJ_G0016883__Ints7	869.224	0.248082	0.119156	2.082	0.0373426	0.72299
MGP_BALBcJ_G0016910__Plekhg1	625.063	0.674217	0.323369	2.08497	0.0370717	0.72299
MGP_BALBcJ_G0017630__Gad1-ps	19.7855	-1.74426	0.835425	-2.08787	0.0368095	0.72299
MGP_BALBcJ_G0018152__Olfr56	38.8649	0.710706	0.340194	2.08912	0.0366966	0.72299
MGP_BALBcJ_G0018365__Smcr8	1833.23	-0.173637	0.0834864	-2.07982	0.0375417	0.72299
MGP_BALBcJ_G0018579__Ggt6	25.8811	1.13583	0.54484	2.0847	0.0370968	0.72299
MGP_BALBcJ_G0018581__Spns2	5752.1	0.261974	0.124859	2.09816	0.035891	0.72299
MGP_BALBcJ_G0018867__Scpep1	1703.61	-0.482259	0.231342	-2.08461	0.0371044	0.72299
MGP_BALBcJ_G0019146__Vat1	4536.7	0.173096	0.0825403	2.0971	0.0359845	0.72299
MGP_BALBcJ_G0019474__Ccdc57	95.6698	0.542134	0.260472	2.08136	0.0374012	0.72299
MGP_BALBcJ_G0019631__Tspan13	1142.08	-0.530893	0.252871	-2.09946	0.0357765	0.72299
MGP_BALBcJ_G0020401__Pxdc1	223.581	-0.605225	0.290212	-2.08545	0.0370281	0.72299
MGP_BALBcJ_G0020542__Lman2	4230.32	-0.221801	0.106441	-2.08378	0.0371798	0.72299
MGP_BALBcJ_G0021404__Ebpl	166.246	0.433452	0.206596	2.09806	0.0358996	0.72299
MGP_BALBcJ_G0021444__Zfp395	1527.51	0.508988	0.243839	2.08739	0.0368528	0.72299
MGP_BALBcJ_G0021476__Adamdec1	91.3919	-1.02054	0.487482	-2.0935	0.0363044	0.72299
MGP_BALBcJ_G0021662__Ptger4	440.669	-0.698983	0.335229	-2.08509	0.0370611	0.72299
MGP_BALBcJ_G0021847__Ndufb9	1993.73	0.19823	0.0952617	2.0809	0.0374434	0.72299
MGP_BALBcJ_G0022382__Map3k12	302.83	-0.39044	0.187517	-2.08216	0.0373278	0.72299
MGP_BALBcJ_G0023276__Npw	2.60528	-3.16164	1.50538	-2.10022	0.0357091	0.72299
MGP_BALBcJ_G0023424__BC004004	1692.06	0.246016	0.117458	2.09451	0.036215	0.72299
MGP_BALBcJ_G0023990__Birc6	4121.58	-0.17775	0.0847305	-2.09783	0.0359199	0.72299
MGP_BALBcJ_G0024686__Sipa1	588.12	-0.463227	0.221829	-2.08822	0.0367782	0.72299
MGP_BALBcJ_G0024713__Cdca5	21.2064	1.19451	0.569616	2.09705	0.035989	0.72299
MGP_BALBcJ_G0024742__Ppp1r14b	1513.61	0.228223	0.109016	2.09349	0.0363056	0.72299
MGP_BALBcJ_G0025592__NA	1192.53	0.252805	0.121285	2.08439	0.0371248	0.72299
MGP_BALBcJ_G0026969__Slco4a1	51.7983	0.727207	0.345705	2.10355	0.035418	0.72299
MGP_BALBcJ_G0027028__Tpd52	940.197	0.278599	0.133555	2.08603	0.0369763	0.72299
MGP_BALBcJ_G0027188__Alg5	1146.01	0.287538	0.137625	2.08929	0.036682	0.72299
MGP_BALBcJ_G0028747__Zc3h12a	480.411	0.42888	0.204459	2.09763	0.0359375	0.72299
MGP_BALBcJ_G0028850__Trnau1ap	676.545	0.251685	0.120964	2.08067	0.0374642	0.72299
MGP_BALBcJ_G0029183__Tnfrsf14	83.7803	-0.862263	0.414326	-2.08112	0.0374228	0.72299
MGP_BALBcJ_G0029450__Rgs12	439.897	0.460356	0.220489	2.08789	0.0368075	0.72299
MGP_BALBcJ_G0029571__Slc30a9	1546.32	-0.154456	0.0736225	-2.09794	0.0359105	0.72299
MGP_BALBcJ_G0029581__Gnpda2	402.622	0.296918	0.142341	2.08597	0.0369814	0.72299
MGP_BALBcJ_G0029607__Usp46	2312.33	0.380765	0.183144	2.07905	0.0376131	0.72299
MGP_BALBcJ_G0029641__Stap1	60.1139	-1.41679	0.680383	-2.08235	0.037311	0.72299
MGP_BALBcJ_G0030425__Tac1	2.03494	3.56716	1.71231	2.08325	0.0372285	0.72299
MGP_BALBcJ_G0030947__Dusp11	5031.86	-0.181113	0.0866379	-2.09046	0.0365763	0.72299
MGP_BALBcJ_G0031019__Aldh1l1	695.586	0.433643	0.207389	2.09096	0.0365314	0.72299
MGP_BALBcJ_G0031833__Rps19	4610.81	0.161292	0.0775863	2.07887	0.0376293	0.72299
MGP_BALBcJ_G0032271__Tmem86a	515.752	-0.284157	0.136464	-2.08229	0.0373162	0.72299
MGP_BALBcJ_G0032417__Pde8a	380.426	0.305705	0.146654	2.08453	0.0371124	0.72299
MGP_BALBcJ_G0032426__3110040N11Rik	264.229	0.250324	0.120153	2.08338	0.0372162	0.72299
MGP_BALBcJ_G0032867__Rras2	811.746	0.204288	0.0971569	2.10266	0.0354955	0.72299
MGP_BALBcJ_G0033032__Bcl7c	410.933	0.234063	0.111416	2.10081	0.0356576	0.72299
MGP_BALBcJ_G0033181__Psmd13	1943.63	0.163854	0.0785446	2.08613	0.0369668	0.72299
MGP_BALBcJ_G0033209__Taldo1	7183.41	0.341298	0.16266	2.09823	0.035885	0.72299
MGP_BALBcJ_G0033508__Leprotl1	863.451	-0.182355	0.0876097	-2.08145	0.0373928	0.72299
MGP_BALBcJ_G0034735__Gm5617	101.528	0.402056	0.192937	2.08388	0.0371715	0.72299
MGP_BALBcJ_G0035439__Tcaim	246.787	-0.300204	0.144408	-2.07885	0.0376311	0.72299
MGP_BALBcJ_G0035807__Fam50a	1231.35	-0.177732	0.0848589	-2.09443	0.0362213	0.72299
MGP_BALBcJ_G0018101__Tenm2	295.989	-0.375836	0.18101	-2.07633	0.0378635	0.72306
MGP_BALBcJ_G0018957__Prr15l	196.446	1.90492	0.916918	2.07752	0.0377535	0.72306
MGP_BALBcJ_G0021523__Med4	450.416	0.299222	0.144049	2.07722	0.0377812	0.72306
MGP_BALBcJ_G0022938__Jam2	1216.42	-0.343508	0.165342	-2.07757	0.0377494	0.72306
MGP_BALBcJ_G0028303__Svep1	2026.27	-0.752589	0.362396	-2.0767	0.037829	0.72306
MGP_BALBcJ_G0034084__Ist1	2940.73	0.202728	0.0976	2.07713	0.0377893	0.72306
MGP_BALBcJ_G0034900__Skor1	2.8881	2.86928	1.38232	2.0757	0.0379217	0.72306
MGP_BALBcJ_G0039202__Gm25604	3.79109	2.01814	0.97209	2.07608	0.0378863	0.72306
MGP_BALBcJ_G0002158__NA	95.5394	0.581212	0.28035	2.07316	0.0381573	0.725275
MGP_BALBcJ_G0002541__Trbv13-2	2.15721	-4.38991	2.11705	-2.0736	0.0381164	0.725275
MGP_BALBcJ_G0020655__Zfp458	103.992	-0.596546	0.287783	-2.0729	0.0381818	0.725275
MGP_BALBcJ_G0034235__Ccsap	52.1494	0.733774	0.353808	2.07393	0.0380854	0.725275
MGP_BALBcJ_G0016247__Per2	810.984	-0.544757	0.263197	-2.06976	0.0384744	0.726166
MGP_BALBcJ_G0022919__Gbe1	449.272	0.560065	0.270416	2.07113	0.0383471	0.726166
MGP_BALBcJ_G0025289__Sephs1	1178.81	0.274692	0.132588	2.07177	0.0382868	0.726166
MGP_BALBcJ_G0026958__Psma7	4320.77	0.246613	0.119137	2.06999	0.0384533	0.726166
MGP_BALBcJ_G0027196__Dclk1	398.013	-0.869878	0.420249	-2.06991	0.0384609	0.726166
MGP_BALBcJ_G0031490__Dennd5b	187.829	-0.496653	0.239892	-2.07032	0.0384226	0.726166
MGP_BALBcJ_G0032989__Fam57b	58.0582	0.975649	0.471398	2.06969	0.038481	0.726166
MGP_BALBcJ_G0015077__Gm15663	67.7065	-0.865567	0.418923	-2.06617	0.0388122	0.726302
MGP_BALBcJ_G0015776__Sulf1	383.473	-0.520606	0.251905	-2.06668	0.0387647	0.726302
MGP_BALBcJ_G0016710__Slamf1	6.60736	-2.45979	1.19122	-2.06493	0.0389292	0.726302
MGP_BALBcJ_G0018067__Nsg2	2.54271	-5.56012	2.68951	-2.06734	0.0387021	0.726302
MGP_BALBcJ_G0018085__Ranbp17	228.367	0.512004	0.247689	2.06712	0.0387227	0.726302
MGP_BALBcJ_G0018699__Phf12	1685.49	0.202875	0.0981772	2.06641	0.0387894	0.726302
MGP_BALBcJ_G0023097__Fgfr1op	583.784	0.303943	0.147213	2.06464	0.0389567	0.726302
MGP_BALBcJ_G0025607__Zbtb34	632.029	0.231385	0.111915	2.06751	0.0386857	0.726302
MGP_BALBcJ_G0030848__St3gal5	61.0209	-0.520202	0.251906	-2.06506	0.0389169	0.726302
MGP_BALBcJ_G0032595__Rrm1	727.68	0.286391	0.138576	2.06667	0.0387649	0.726302
MGP_BALBcJ_G0033470__Fnta	1065.5	0.201232	0.0974185	2.06564	0.0388624	0.726302
MGP_BALBcJ_G0035969__Magt1	2845.47	-0.325612	0.157673	-2.06511	0.0389126	0.726302
MGP_BALBcJ_G0039611__NA	42.0807	-0.629125	0.304438	-2.06651	0.03878	0.726302
MGP_BALBcJ_G0001352__NA	24.3574	0.781618	0.379875	2.05756	0.0396319	0.735537
MGP_BALBcJ_G0015946__Gls	1924.17	-0.258739	0.12577	-2.05723	0.039664	0.735537
MGP_BALBcJ_G0017266__Arid5b	1960.36	-0.261941	0.127266	-2.05821	0.0395701	0.735537
MGP_BALBcJ_G0019573__Grhl1	1248.67	0.299285	0.145425	2.058	0.0395897	0.735537
MGP_BALBcJ_G0022628__Map3k13	36.4278	-0.755966	0.367238	-2.05852	0.0395406	0.735537
MGP_BALBcJ_G0027711__Kcna3	16.1703	-1.47841	0.718786	-2.05682	0.0397033	0.735537
MGP_BALBcJ_G0034976__Gm10642	22.1242	0.923613	0.449058	2.05678	0.0397075	0.735537
MGP_BALBcJ_G0015321__NA	12.2605	-2.03823	0.992624	-2.05337	0.0400366	0.735695
MGP_BALBcJ_G0020479__Wnk2	1136.97	0.632808	0.308191	2.0533	0.040044	0.735695
MGP_BALBcJ_G0020568__Slc25a48	236.264	2.08118	1.01349	2.05348	0.0400259	0.735695
MGP_BALBcJ_G0023102__Prr18	37.0317	-0.751209	0.365332	-2.05624	0.0397599	0.735695
MGP_BALBcJ_G0024784__Ubxn1	1982.89	0.212689	0.10346	2.05576	0.0398053	0.735695
MGP_BALBcJ_G0025039__Slc16a12	334.225	0.668889	0.325765	2.05329	0.0400445	0.735695
MGP_BALBcJ_G0027307__Plrg1	723.995	0.196942	0.095866	2.05434	0.0399425	0.735695
MGP_BALBcJ_G0028676__P3h1	519.57	-0.335941	0.163467	-2.0551	0.0398693	0.735695
MGP_BALBcJ_G0032354__Pgpep1l	1.81871	-3.59598	1.75003	-2.05481	0.0398972	0.735695
MGP_BALBcJ_G0028637__Slc6a9	127.909	0.623103	0.303619	2.05225	0.0401454	0.736206
MGP_BALBcJ_G0035790__Arhgap4	272.697	-0.903935	0.440387	-2.05259	0.0401119	0.736206
MGP_BALBcJ_G0023542__Notch4	590.398	-0.389869	0.190022	-2.0517	0.0401988	0.736516
MGP_BALBcJ_G0016028__Dytn	17.0545	-1.31426	0.641109	-2.04998	0.0403662	0.737141
MGP_BALBcJ_G0023499__Angptl4	35910	-0.399525	0.194976	-2.0491	0.0404524	0.737141
MGP_BALBcJ_G0027084__Fndc3b	6592.79	-0.337518	0.164706	-2.04921	0.0404414	0.737141
MGP_BALBcJ_G0028992__Tmco4	396.347	0.309485	0.151015	2.04937	0.0404259	0.737141
MGP_BALBcJ_G0029825__Mtf2	945.316	0.260529	0.12709	2.04996	0.0403687	0.737141
MGP_BALBcJ_G0032073__Rhpn2	3364.66	-0.221577	0.108098	-2.04978	0.0403856	0.737141
MGP_BALBcJ_G0025092__Tm9sf3	11838.1	-0.0983992	0.048034	-2.04853	0.0405078	0.737483
MGP_BALBcJ_G0000138__Igkv8-34	5.02982	4.01328	1.98131	2.02557	0.0428089	0.737879
MGP_BALBcJ_G0003154__Gm26555	9.04667	-1.43526	0.706035	-2.03285	0.0420675	0.737879
MGP_BALBcJ_G0004383__Gm26550	83.7996	0.464464	0.229559	2.02329	0.043043	0.737879
MGP_BALBcJ_G0004452__Gm15635	47.1517	0.955754	0.468204	2.04132	0.0412192	0.737879
MGP_BALBcJ_G0005733__Gm26865	1.04594	-4.06681	2.00901	-2.02429	0.0429407	0.737879
MGP_BALBcJ_G0012248__NA	4.1712	3.17574	1.55161	2.04673	0.0406843	0.737879
MGP_BALBcJ_G0015770__Cops5	1570.02	0.165888	0.0820441	2.02194	0.0431831	0.737879
MGP_BALBcJ_G0016236__Rab17	426.947	0.701222	0.343057	2.04404	0.0409498	0.737879
MGP_BALBcJ_G0016438__Prelp	6168.75	-0.691128	0.341848	-2.02174	0.0432031	0.737879
MGP_BALBcJ_G0016543__Rnasel	1820.83	-0.361272	0.178738	-2.02124	0.0432552	0.737879
MGP_BALBcJ_G0016707__Ly9	97.2331	-1.22197	0.599938	-2.03682	0.041668	0.737879
MGP_BALBcJ_G0016867__Smyd2	1170.31	0.173775	0.0856415	2.0291	0.0424479	0.737879
MGP_BALBcJ_G0016914__Rmnd1	424.348	-0.216012	0.106862	-2.02141	0.0432374	0.737879
MGP_BALBcJ_G0017368__Casp14	20.9881	-1.1717	0.576861	-2.03117	0.0422382	0.737879
MGP_BALBcJ_G0017388__Shc2	97.263	-0.574732	0.281794	-2.03955	0.0413956	0.737879
MGP_BALBcJ_G0017486__Mrpl54	634.531	0.266157	0.13078	2.03514	0.0418366	0.737879
MGP_BALBcJ_G0017538__Ric8b	533.554	-0.215467	0.105549	-2.0414	0.0412116	0.737879
MGP_BALBcJ_G0017608__Plxnc1	179.552	-0.96182	0.470985	-2.04215	0.0411371	0.737879
MGP_BALBcJ_G0017697__Lyz1	512.834	-0.622503	0.305759	-2.03593	0.0417573	0.737879
MGP_BALBcJ_G0018028__Ahsa2	1035.77	-0.214048	0.104717	-2.04407	0.0409467	0.737879
MGP_BALBcJ_G0018326__Trim11	2181.83	0.244459	0.120495	2.0288	0.0424788	0.737879
MGP_BALBcJ_G0019249__Icam2	129.081	-0.518926	0.256238	-2.02517	0.0428495	0.737879
MGP_BALBcJ_G0019345__Llgl2	853.545	0.301782	0.14769	2.04334	0.0410189	0.737879
MGP_BALBcJ_G0019492__Tbcd	1232.28	0.281889	0.138223	2.03938	0.0414122	0.737879
MGP_BALBcJ_G0019654__Nrcam	1071.43	-0.798369	0.39479	-2.02226	0.0431494	0.737879
MGP_BALBcJ_G0019665__Strn3	1767.53	-0.164579	0.0806358	-2.04102	0.0412493	0.737879
MGP_BALBcJ_G0019679__Cfl2	992.58	0.171544	0.0845362	2.02924	0.0424341	0.737879
MGP_BALBcJ_G0019892__Eif2b2	732.248	0.214596	0.10513	2.04125	0.0412261	0.737879
MGP_BALBcJ_G0019911__Cipc	1999.51	-0.194386	0.095149	-2.04297	0.0410556	0.737879
MGP_BALBcJ_G0021517__Fndc3a	7528.27	-0.156384	0.076967	-2.03183	0.042171	0.737879
MGP_BALBcJ_G0021776__Atp6v1c1	1623.65	-0.257762	0.127422	-2.0229	0.0430831	0.737879
MGP_BALBcJ_G0021782__Rims2	105.102	0.537689	0.265987	2.02148	0.0432297	0.737879
MGP_BALBcJ_G0021817__Enpp2	355.655	-0.676605	0.333706	-2.02755	0.042606	0.737879
MGP_BALBcJ_G0022089__Tob2	1587.85	0.284376	0.140115	2.02958	0.0423988	0.737879
MGP_BALBcJ_G0022165__Celsr1	260.798	0.761532	0.376442	2.02297	0.0430762	0.737879
MGP_BALBcJ_G0022473__Tvp23a	18.2278	-1.1188	0.549654	-2.03546	0.0418049	0.737879
MGP_BALBcJ_G0022519__Mzt2	207.878	0.318988	0.155839	2.0469	0.0406676	0.737879
MGP_BALBcJ_G0022563__Slc25a1	2354.93	0.537893	0.265663	2.02472	0.0428958	0.737879
MGP_BALBcJ_G0022656__Lpp	5678.51	-0.122309	0.0598827	-2.04247	0.0411052	0.737879
MGP_BALBcJ_G0023404__Fkbp5	1962.62	1.79162	0.87885	2.0386	0.0414902	0.737879
MGP_BALBcJ_G0023460__Notch3	1833.87	-0.290185	0.142289	-2.0394	0.0414101	0.737879
MGP_BALBcJ_G0023992__Ltbp1	1509.89	0.345652	0.17067	2.02526	0.0428404	0.737879
MGP_BALBcJ_G0024095__Mkx	284.432	-0.534198	0.263876	-2.02443	0.0429258	0.737879
MGP_BALBcJ_G0024239__Psd2	30.4002	-0.726151	0.35734	-2.0321	0.0421433	0.737879
MGP_BALBcJ_G0024281__Pcdhb6	7.84624	1.29125	0.6351	2.03315	0.0420376	0.737879
MGP_BALBcJ_G0024299__Taf7	289.256	0.277578	0.136858	2.02822	0.042538	0.737879
MGP_BALBcJ_G0024481__Lman1	3387.36	-0.2496	0.12317	-2.02646	0.0427176	0.737879
MGP_BALBcJ_G0025606__Angptl2	1131.06	-0.415257	0.204349	-2.0321	0.0421437	0.737879
MGP_BALBcJ_G0026435__Gpat2	9.43497	-2.02267	0.997853	-2.02702	0.0426604	0.737879
MGP_BALBcJ_G0026583__Thbd	665.656	-0.431399	0.213072	-2.02466	0.0429018	0.737879
MGP_BALBcJ_G0026796__Oser1	1154.56	0.152542	0.0747006	2.04205	0.0411464	0.737879
MGP_BALBcJ_G0027433__Dennd4b	470.664	-0.40136	0.196985	-2.03751	0.0415986	0.737879
MGP_BALBcJ_G0027564__Tars2	706.095	-0.238178	0.117879	-2.02053	0.0433282	0.737879
MGP_BALBcJ_G0027855__NA	1040.94	0.263736	0.129757	2.03254	0.0420995	0.737879
MGP_BALBcJ_G0027908__Bmpr1b	14.0367	-1.10635	0.543693	-2.03488	0.0418631	0.737879
MGP_BALBcJ_G0027971__Acadm	2700.87	0.285493	0.140647	2.02985	0.0423722	0.737879
MGP_BALBcJ_G0028283__Tmem38b	333.451	0.446449	0.219774	2.0314	0.0422147	0.737879
MGP_BALBcJ_G0028919__Tmem50a	1694.48	0.193816	0.0956474	2.02636	0.0427283	0.737879
MGP_BALBcJ_G0029098__Draxin	6.15243	-3.00996	1.47211	-2.04465	0.0408893	0.737879
MGP_BALBcJ_G0030305__Actb	39686	0.235141	0.116159	2.02431	0.0429384	0.737879
MGP_BALBcJ_G0030351__NA	484.584	0.241652	0.118964	2.0313	0.0422242	0.737879
MGP_BALBcJ_G0030487__Pot1a	416.972	0.229142	0.112408	2.03849	0.0415005	0.737879
MGP_BALBcJ_G0030857__Ggcx	687.726	-0.384081	0.187999	-2.043	0.0410525	0.737879
MGP_BALBcJ_G0031196__Slc6a13	4.4192	-2.82904	1.40028	-2.02034	0.0433486	0.737879
MGP_BALBcJ_G0031554__Sbk3	12.8214	1.29045	0.635211	2.03153	0.0422018	0.737879
MGP_BALBcJ_G0031966__Ppp1r14a	32.5332	-0.820187	0.40252	-2.03763	0.0415871	0.737879
MGP_BALBcJ_G0032447__Abhd17c	4559.62	-0.520052	0.257249	-2.02159	0.0432188	0.737879
MGP_BALBcJ_G0032743__Trim3	930.35	0.243802	0.120312	2.02641	0.042723	0.737879
MGP_BALBcJ_G0033948__Dok4	309.539	0.274028	0.135612	2.02067	0.0433139	0.737879
MGP_BALBcJ_G0034023__Atp6v0d1	3830.44	-0.208217	0.102239	-2.03656	0.041694	0.737879
MGP_BALBcJ_G0034028__Acd	656.498	0.27633	0.135674	2.03672	0.0416783	0.737879
MGP_BALBcJ_G0034785__Npat	669.261	0.167571	0.0819684	2.04434	0.0409203	0.737879
MGP_BALBcJ_G0034816__Isl2	1.13457	3.9941	1.95732	2.04059	0.0412914	0.737879
MGP_BALBcJ_G0035363__Tmppe	427.88	0.247187	0.121721	2.03077	0.042278	0.737879
MGP_BALBcJ_G0035571__Elk1	394.162	-0.243754	0.119778	-2.03505	0.0418463	0.737879
MGP_BALBcJ_G0037046__Gm43914	6.82439	-1.5998	0.789892	-2.02534	0.0428326	0.737879
MGP_BALBcJ_G0039787__NA	921.545	0.200973	0.0991124	2.02773	0.042588	0.737879
MGP_BALBcJ_G0001836__NA	24.764	1.09898	0.545417	2.01494	0.0439112	0.738005
MGP_BALBcJ_G0004173__6330403L08Rik	112.261	0.516466	0.257197	2.00805	0.0446377	0.738005
MGP_BALBcJ_G0005938__Gm10804	7.02645	1.72643	0.856289	2.01617	0.0437822	0.738005
MGP_BALBcJ_G0009562__Gm27457	2.29724	-3.43681	1.70615	-2.01437	0.0439711	0.738005
MGP_BALBcJ_G0009912__Atp10d	2538.44	-0.41167	0.204085	-2.01715	0.0436795	0.738005
MGP_BALBcJ_G0011027__NA	40.4073	-1.73602	0.862024	-2.01388	0.0440217	0.738005
MGP_BALBcJ_G0011236__NA	13.1294	1.10378	0.549413	2.00902	0.0445355	0.738005
MGP_BALBcJ_G0015756__Rb1cc1	2355.62	0.205577	0.10189	2.01762	0.0436306	0.738005
MGP_BALBcJ_G0015993__Ndufb3	451.739	-1.20867	0.59931	-2.01677	0.0437197	0.738005
MGP_BALBcJ_G0016098__Cyp27a1	218.283	-0.670466	0.332574	-2.01599	0.0438012	0.738005
MGP_BALBcJ_G0016712__Gm10521	17.7005	-1.92176	0.953072	-2.01639	0.0437597	0.738005
MGP_BALBcJ_G0017011__Eya4	32.4585	-0.832349	0.414147	-2.00979	0.0444534	0.738005
MGP_BALBcJ_G0017085__Marcks	2614.71	-0.403528	0.20029	-2.01472	0.043934	0.738005
MGP_BALBcJ_G0018062__Chac2	83.8332	-0.424894	0.210583	-2.01771	0.0436219	0.738005
MGP_BALBcJ_G0018203__Zfp354a	101.859	0.469917	0.233436	2.01304	0.04411	0.738005
MGP_BALBcJ_G0022256__Zfp641	250.516	0.381448	0.18991	2.00858	0.0445819	0.738005
MGP_BALBcJ_G0022369__Zfp740	2646.89	0.328936	0.163321	2.01404	0.0440051	0.738005
MGP_BALBcJ_G0025127__Cox15	792.559	0.213783	0.106458	2.00815	0.0446271	0.738005
MGP_BALBcJ_G0025579__Lcn2	143749	0.237973	0.118359	2.01061	0.0443668	0.738005
MGP_BALBcJ_G0026320__Oip5	10.9376	1.35769	0.67478	2.01204	0.0442154	0.738005
MGP_BALBcJ_G0026555__Rrbp1	10964.8	-0.366746	0.181765	-2.0177	0.0436227	0.738005
MGP_BALBcJ_G0026947__Zfp831	10.2139	-2.57458	1.27725	-2.01572	0.0438297	0.738005
MGP_BALBcJ_G0027702__Chil3	64.0763	1.63649	0.813161	2.01251	0.0441666	0.738005
MGP_BALBcJ_G0029204__Ssu72	1375.85	0.153743	0.0765173	2.00925	0.0445105	0.738005
MGP_BALBcJ_G0029487__Otop1	57.0455	0.947559	0.471069	2.01151	0.0442719	0.738005
MGP_BALBcJ_G0029561__Rhoh	49.1791	-1.29598	0.641635	-2.0198	0.0434038	0.738005
MGP_BALBcJ_G0030251__NA	4.22921	-3.0912	1.53075	-2.0194	0.0434456	0.738005
MGP_BALBcJ_G0031583__Zfp78	46.4999	-0.586496	0.291782	-2.01005	0.0444258	0.738005
MGP_BALBcJ_G0032341__Lrrk1	421.287	-0.558242	0.277084	-2.01471	0.0439355	0.738005
MGP_BALBcJ_G0033264__Mrgprg	5.36586	2.20899	1.09815	2.01156	0.0442661	0.738005
MGP_BALBcJ_G0033310__Tgfbr3l	78.0784	0.525967	0.26144	2.01181	0.0442401	0.738005
MGP_BALBcJ_G0033956__Cngb1	131.064	0.614582	0.30559	2.01114	0.0443111	0.738005
MGP_BALBcJ_G0034482__Adamts15	900.75	-0.325217	0.161914	-2.00858	0.0445816	0.738005
MGP_BALBcJ_G0035201__Gm10709	1076.95	0.187332	0.0932112	2.00976	0.0444571	0.738005
MGP_BALBcJ_G0036053__Nxf7	111.632	1.02584	0.509575	2.01313	0.0441011	0.738005
MGP_BALBcJ_G0016430__Sox13	773.656	0.551017	0.274535	2.00709	0.0447397	0.739085
MGP_BALBcJ_G0018495__Fgf11	84.4054	-0.509546	0.254048	-2.00571	0.0448874	0.740917
MGP_BALBcJ_G0028756__Thrap3	4425.66	0.167517	0.083555	2.00487	0.0449766	0.741782
MGP_BALBcJ_G0003820__NA	16.5007	-1.14365	0.570747	-2.00379	0.045093	0.742379
MGP_BALBcJ_G0019255__Ddx5	25817	-0.155376	0.077552	-2.0035	0.0451233	0.742379
MGP_BALBcJ_G0035182__Cpne4	1.44079	-4.55624	2.27368	-2.0039	0.0450806	0.742379
MGP_BALBcJ_G0025341__Plxdc2	877.189	-0.369787	0.184666	-2.00246	0.0452351	0.743612
MGP_BALBcJ_G0021736__Fam173b	439.958	-0.216478	0.108135	-2.00192	0.0452937	0.743969
MGP_BALBcJ_G0000106__Igkv1-122	280.543	0.596192	0.298488	1.99738	0.0457844	0.745948
MGP_BALBcJ_G0016754__NA	138.237	-0.814436	0.407682	-1.99772	0.0457467	0.745948
MGP_BALBcJ_G0021094__Parg	921.243	-0.199274	0.0996222	-2.00029	0.0454685	0.745948
MGP_BALBcJ_G0021120__Gprin2	6.67481	-1.40742	0.704205	-1.99859	0.0456524	0.745948
MGP_BALBcJ_G0022705__Tctex1d2	173.667	-0.309825	0.154954	-1.99947	0.0455579	0.745948
MGP_BALBcJ_G0023536__H2-Eb2	10.2098	-1.61471	0.808393	-1.99743	0.045778	0.745948
MGP_BALBcJ_G0028474__Dnajc6	551.868	0.244225	0.122245	1.99783	0.0457353	0.745948
MGP_BALBcJ_G0029342__Dpp6	4.06275	-2.14117	1.07066	-1.99987	0.0455143	0.745948
MGP_BALBcJ_G0031914__Fcgbp	30315	-0.564441	0.282343	-1.99913	0.0455941	0.745948
MGP_BALBcJ_G0033141__Tubgcp2	606.142	0.296954	0.148636	1.99786	0.0457315	0.745948
MGP_BALBcJ_G0036044__Btk	140.961	-0.78224	0.391704	-1.99702	0.045823	0.745975
MGP_BALBcJ_G0015861__Lman2l	958.425	-0.261837	0.131205	-1.99563	0.0459745	0.7468
MGP_BALBcJ_G0029475__Jakmip1	10.3596	-2.11619	1.06064	-1.99519	0.0460219	0.7468
MGP_BALBcJ_G0031206__Aicda	2.97474	-3.45776	1.73291	-1.99535	0.046005	0.7468
MGP_BALBcJ_G0034232__Gas8	392.766	0.254657	0.127605	1.99567	0.0459701	0.7468
MGP_BALBcJ_G0014868__NA	4.94465	-1.87327	0.939632	-1.99362	0.0461937	0.748985
MGP_BALBcJ_G0021651__AW549877	2356.51	-0.159967	0.080305	-1.992	0.0463714	0.749613
MGP_BALBcJ_G0022550__Slc7a4	494.479	0.440397	0.221087	1.99196	0.0463751	0.749613
MGP_BALBcJ_G0023387__Rps10	4787.55	0.16653	0.0836031	1.99191	0.0463812	0.749613
MGP_BALBcJ_G0031309__NA	2.10656	3.21502	1.61359	1.99247	0.0463194	0.749613
MGP_BALBcJ_G0017433__Rps15	6509.43	0.146474	0.073657	1.98859	0.0467461	0.751424
MGP_BALBcJ_G0021281__Cdh24	78.9224	-0.447157	0.224779	-1.98932	0.0466661	0.751424
MGP_BALBcJ_G0025125__Slc25a28	896.548	0.212594	0.10688	1.98908	0.0466923	0.751424
MGP_BALBcJ_G0027724__Strip1	1142.04	0.264218	0.132807	1.98949	0.0466469	0.751424
MGP_BALBcJ_G0029785__Sparcl1	4010.65	-0.490072	0.246327	-1.98952	0.0466435	0.751424
MGP_BALBcJ_G0033354__Lamp1	21432.7	-0.223488	0.11238	-1.98867	0.0467378	0.751424
MGP_BALBcJ_G0033950__Adgrg5	198.224	-0.636854	0.320265	-1.98852	0.0467543	0.751424
MGP_BALBcJ_G0016851__Iars2	1957.74	0.300305	0.151132	1.98704	0.0469176	0.751831
MGP_BALBcJ_G0029549__Klhl5	924.046	-0.260074	0.130874	-1.98722	0.0468983	0.751831
MGP_BALBcJ_G0033809__Ndufb7	1245.34	0.216945	0.109186	1.98694	0.0469288	0.751831
MGP_BALBcJ_G0035384__Ctdspl	1109.38	0.225276	0.113348	1.98747	0.0468698	0.751831
MGP_BALBcJ_G0001729__NA	3.27484	2.80499	1.41314	1.98493	0.0471518	0.751862
MGP_BALBcJ_G0005384__Gm26583	5.23045	1.87792	0.945508	1.98615	0.0470167	0.751862
MGP_BALBcJ_G0018246__Gm12216	9.41541	-1.27577	0.642733	-1.98491	0.0471546	0.751862
MGP_BALBcJ_G0023356__Axin1	1505.55	0.178514	0.0898917	1.98588	0.0470461	0.751862
MGP_BALBcJ_G0030118__Tpst1	354.287	-0.42451	0.213777	-1.98577	0.0470594	0.751862
MGP_BALBcJ_G0031088__Oxtr	2176.05	-0.647315	0.32605	-1.98533	0.0471081	0.751862
MGP_BALBcJ_G0016463__Rnpep	2405.78	-0.224831	0.113316	-1.9841	0.0472448	0.752146
MGP_BALBcJ_G0017502__S1pr4	30.8231	-1.1196	0.56429	-1.98408	0.0472471	0.752146
MGP_BALBcJ_G0006839__5930430L01Rik	195.554	-0.309626	0.156089	-1.98365	0.0472948	0.752311
MGP_BALBcJ_G0008051__Mir27b	27.3677	0.999619	0.504085	1.98304	0.0473634	0.752809
MGP_BALBcJ_G0021933__Tsta3	1432.1	0.275293	0.138977	1.98085	0.0476082	0.753729
MGP_BALBcJ_G0022282__Lmbr1l	526.789	0.353791	0.178523	1.98176	0.0475057	0.753729
MGP_BALBcJ_G0032012__Psenen	1362.32	0.187607	0.0947001	1.98107	0.0475838	0.753729
MGP_BALBcJ_G0032332__Ndnl2	417.792	0.247327	0.124846	1.98105	0.0475854	0.753729
MGP_BALBcJ_G0033701__Pde4c	170.293	0.819188	0.413488	1.98116	0.0475728	0.753729
MGP_BALBcJ_G0018792__Ccl5	47.6804	-1.24383	0.628166	-1.9801	0.0476928	0.753955
MGP_BALBcJ_G0035424__Nktr	8071.63	-0.199374	0.100691	-1.98006	0.0476973	0.753955
MGP_BALBcJ_G0028301__Txn1	2599.33	0.210414	0.106297	1.97949	0.0477607	0.754364
MGP_BALBcJ_G0019132__Wnk4	54.2979	-0.857645	0.433341	-1.97915	0.0477994	0.754385
MGP_BALBcJ_G0019363__Evpl	370.441	0.491063	0.248219	1.97834	0.0478899	0.755221
MGP_BALBcJ_G0004514__Proscos	7.1094	1.57189	0.795123	1.97691	0.0480518	0.756
MGP_BALBcJ_G0018189__Adamts2	1062.64	-0.536175	0.271214	-1.97695	0.0480474	0.756
MGP_BALBcJ_G0026832__Wfdc2	1497	0.699892	0.353958	1.97733	0.0480039	0.756
MGP_BALBcJ_G0016805__Itpkb	1029.34	-0.409612	0.207279	-1.97614	0.0481386	0.756775
MGP_BALBcJ_G0022760__Iqcb1	242.541	0.261979	0.132598	1.97574	0.0481841	0.7569
MGP_BALBcJ_G0015262__NA	74.3839	-0.481706	0.243851	-1.97541	0.0482217	0.756901
MGP_BALBcJ_G0007311__Gm26586	1.20895	4.02331	2.03906	1.97312	0.0484821	0.756905
MGP_BALBcJ_G0010068__NA	14.5655	-0.977366	0.495199	-1.97369	0.0484175	0.756905
MGP_BALBcJ_G0020810__Hexb	1441.33	-0.541982	0.274683	-1.97312	0.0484823	0.756905
MGP_BALBcJ_G0023922__Adgre1	705.724	-0.758622	0.384414	-1.97345	0.0484441	0.756905
MGP_BALBcJ_G0026876__Prex1	939.177	-0.260213	0.131903	-1.97276	0.0485224	0.756905
MGP_BALBcJ_G0029372__Dpysl5	5.61113	-2.13027	1.0798	-1.97284	0.0485133	0.756905
MGP_BALBcJ_G0031522__1700027J19Rik	116.5	0.406567	0.206067	1.97299	0.048497	0.756905
MGP_BALBcJ_G0033215__Pnpla2	8618.1	0.411476	0.208534	1.97319	0.0484741	0.756905
MGP_BALBcJ_G0000064__Ighv3-5	16.0958	-2.33193	1.18978	-1.95997	0.0499994	0.758077
MGP_BALBcJ_G0002009__NA	7.4285	1.85379	0.948426	1.9546	0.0506302	0.758077
MGP_BALBcJ_G0003117__Prox2os	27.5468	0.780803	0.39972	1.95338	0.0507751	0.758077
MGP_BALBcJ_G0004488__Tspan32os	12.4976	0.95707	0.488549	1.959	0.0501124	0.758077
MGP_BALBcJ_G0005517__5330426L24Rik	23.8136	1.29071	0.656043	1.96741	0.0491356	0.758077
MGP_BALBcJ_G0006143__Platr4	1.66081	-3.43818	1.75167	-1.96281	0.0496687	0.758077
MGP_BALBcJ_G0007098__Gm26600	1.87841	3.72091	1.90107	1.95727	0.0503155	0.758077
MGP_BALBcJ_G0007552__Gm15232	4.32787	-2.73041	1.39234	-1.96102	0.0498771	0.758077
MGP_BALBcJ_G0010594__NA	234.367	0.329249	0.167012	1.97141	0.0486765	0.758077
MGP_BALBcJ_G0011361__NA	5.53426	-1.55932	0.802659	-1.94269	0.0520536	0.758077
MGP_BALBcJ_G0014640__NA	8.2933	-1.22385	0.62588	-1.9554	0.0505357	0.758077
MGP_BALBcJ_G0015268__Gm10785	17.2692	0.988868	0.507177	1.94975	0.0512062	0.758077
MGP_BALBcJ_G0015659__A230103J11Rik	36.8458	0.665663	0.338522	1.96638	0.0492547	0.758077
MGP_BALBcJ_G0015942__Nabp1	3933.43	-0.607512	0.309355	-1.9638	0.0495529	0.758077
MGP_BALBcJ_G0016206__Inpp5d	708.561	-0.625586	0.317908	-1.96782	0.0490885	0.758077
MGP_BALBcJ_G0016225__Arl4c	696.453	-0.476338	0.244508	-1.94815	0.0513976	0.758077
MGP_BALBcJ_G0017275__Fam13c	165.669	-0.537879	0.276879	-1.94265	0.0520581	0.758077
MGP_BALBcJ_G0017792__Timeless	285.714	0.342528	0.17405	1.96798	0.0490702	0.758077
MGP_BALBcJ_G0018215__Sec24a	1298.39	-0.168128	0.0859707	-1.95564	0.0505076	0.758077
MGP_BALBcJ_G0018501__Plscr3	1705.94	0.208788	0.107419	1.94368	0.0519344	0.758077
MGP_BALBcJ_G0018555__Zfp3	127.036	0.304931	0.156899	1.94349	0.0519572	0.758077
MGP_BALBcJ_G0018827__Ints2	717.642	-0.337446	0.172989	-1.95069	0.0510943	0.758077
MGP_BALBcJ_G0018978__Psmb3	1777.48	0.213914	0.109295	1.95721	0.0503227	0.758077
MGP_BALBcJ_G0019002__NA	820.342	0.384004	0.196957	1.94968	0.0512145	0.758077
MGP_BALBcJ_G0019013__Thra	802.387	0.282461	0.14485	1.95003	0.0511721	0.758077
MGP_BALBcJ_G0019194__Dcakd	673.621	-0.224443	0.114897	-1.95343	0.0507686	0.758077
MGP_BALBcJ_G0019222__Efcab3	2.24289	-3.59513	1.8411	-1.95271	0.0508543	0.758077
MGP_BALBcJ_G0019295__Cpsf4l	609.271	0.35716	0.18236	1.95854	0.0501669	0.758077
MGP_BALBcJ_G0019467__Rac3	514.235	0.521438	0.266537	1.95635	0.0504242	0.758077
MGP_BALBcJ_G0019825__Exd2	563.772	-0.173238	0.0879418	-1.96992	0.0488474	0.758077
MGP_BALBcJ_G0019869__Zfp410	897.61	0.220935	0.112157	1.96988	0.0488521	0.758077
MGP_BALBcJ_G0020114__Crip1	756.938	0.543602	0.278358	1.95289	0.0508331	0.758077
MGP_BALBcJ_G0020182__B3galnt2	1172.36	-0.192486	0.0985946	-1.9523	0.0509028	0.758077
MGP_BALBcJ_G0020324__Cmah	127.683	-0.75695	0.389552	-1.94313	0.0520007	0.758077
MGP_BALBcJ_G0020587__Agtpbp1	1484.06	-0.156723	0.0800219	-1.95851	0.0501707	0.758077
MGP_BALBcJ_G0021081__Mettl6	562.155	0.25936	0.133289	1.94585	0.0516725	0.758077
MGP_BALBcJ_G0021114__Zfp488	117.316	-0.38069	0.194793	-1.95433	0.0506621	0.758077
MGP_BALBcJ_G0021842__Tmem65	861.182	0.301033	0.153178	1.96525	0.0493854	0.758077
MGP_BALBcJ_G0022077__St13	3950.68	-0.27341	0.140672	-1.9436	0.0519435	0.758077
MGP_BALBcJ_G0022094__Pmm1	460.976	0.252417	0.128326	1.967	0.049183	0.758077
MGP_BALBcJ_G0022429__Adcy9	1214.95	-0.289848	0.148556	-1.95111	0.0510443	0.758077
MGP_BALBcJ_G0022826__Plcxd2	299.877	-0.645423	0.328613	-1.96409	0.0495201	0.758077
MGP_BALBcJ_G0022911__NA	682.177	0.20219	0.103069	1.9617	0.049797	0.758077
MGP_BALBcJ_G0023316__Tpsab1	41.3924	0.762145	0.390456	1.95194	0.0509458	0.758077
MGP_BALBcJ_G0024544__Haus1	150.365	0.356717	0.181581	1.96451	0.0494714	0.758077
MGP_BALBcJ_G0024734__Prdx5	2525.33	0.184368	0.0942305	1.95656	0.0503992	0.758077
MGP_BALBcJ_G0024960__Smc5	1330.82	0.189971	0.0970657	1.95714	0.0503314	0.758077
MGP_BALBcJ_G0024987__Glis3	344.486	0.431066	0.21935	1.9652	0.0493914	0.758077
MGP_BALBcJ_G0025017__Papss2	278.547	-0.401822	0.206381	-1.94699	0.0515357	0.758077
MGP_BALBcJ_G0025243__Ablim1	1820.62	-0.386813	0.196944	-1.96408	0.049521	0.758077
MGP_BALBcJ_G0025525__Pkn3	242.344	-0.289011	0.146923	-1.9671	0.0491718	0.758077
MGP_BALBcJ_G0025569__Fam78a	63.7602	-0.98783	0.50691	-1.94873	0.0513279	0.758077
MGP_BALBcJ_G0025833__NA	90.3487	0.472195	0.242596	1.94643	0.0516033	0.758077
MGP_BALBcJ_G0026177__Caprin1	9252.26	-0.159087	0.0809182	-1.96602	0.0492965	0.758077
MGP_BALBcJ_G0026426__Itpripl1	674.904	0.612515	0.311763	1.96468	0.0494513	0.758077
MGP_BALBcJ_G0026577__Xrn2	2442.94	0.273782	0.140307	1.95131	0.0510201	0.758077
MGP_BALBcJ_G0026971__Mrgbp	486.321	0.239904	0.122392	1.96014	0.0499798	0.758077
MGP_BALBcJ_G0027687__Cttnbp2nl	1786.16	-0.297456	0.152715	-1.94779	0.0514405	0.758077
MGP_BALBcJ_G0027795__Dpyd	501.715	0.386914	0.196772	1.96631	0.0492633	0.758077
MGP_BALBcJ_G0028200__Hrct1	175.902	0.72119	0.371159	1.94308	0.0520067	0.758077
MGP_BALBcJ_G0028465__Efcab7	82.3186	0.493612	0.253996	1.94338	0.0519701	0.758077
MGP_BALBcJ_G0028609__Gpbp1l1	2505.85	0.186363	0.0951435	1.95876	0.0501407	0.758077
MGP_BALBcJ_G0028837__Laptm5	1988.87	-0.691108	0.354882	-1.94743	0.0514833	0.758077
MGP_BALBcJ_G0028873__Tmem222	851.545	0.20101	0.102514	1.96081	0.0499014	0.758077
MGP_BALBcJ_G0028900__Zfp593	175.799	0.322171	0.164282	1.96109	0.049869	0.758077
MGP_BALBcJ_G0029297__Armc10	1325.79	0.221861	0.113324	1.95777	0.0502575	0.758077
MGP_BALBcJ_G0029340__Xrcc2	54.1928	0.593307	0.301127	1.97028	0.0488057	0.758077
MGP_BALBcJ_G0029341__Actr3b	63.5282	-0.964068	0.493009	-1.95548	0.0505267	0.758077
MGP_BALBcJ_G0029429__Fgfr3	73.7699	0.560273	0.285721	1.96091	0.0498897	0.758077
MGP_BALBcJ_G0029580__Guf1	617.02	0.198719	0.101847	1.95115	0.0510391	0.758077
MGP_BALBcJ_G0030520__Tmem209	560.415	0.222488	0.113857	1.9541	0.0506899	0.758077
MGP_BALBcJ_G0031213__C3ar1	479.981	-0.64098	0.326908	-1.96074	0.0499097	0.758077
MGP_BALBcJ_G0031421__Slc15a5	28.2681	0.907694	0.462939	1.96072	0.0499118	0.758077
MGP_BALBcJ_G0031755__Ercc2	1260.87	0.237471	0.121794	1.94977	0.051203	0.758077
MGP_BALBcJ_G0032008__Arhgap33	346.292	0.529355	0.269719	1.96262	0.0496904	0.758077
MGP_BALBcJ_G0032117__Vsig10l	188.2	0.497959	0.25466	1.95539	0.0505376	0.758077
MGP_BALBcJ_G0032257__Tph1	168.527	-0.83836	0.428908	-1.95464	0.0506255	0.758077
MGP_BALBcJ_G0032504__Gab2	1039.97	0.282818	0.145379	1.94539	0.0517286	0.758077
MGP_BALBcJ_G0032944__Prkcb	236.965	-0.544571	0.280243	-1.94321	0.0519911	0.758077
MGP_BALBcJ_G0033801__Rnf150	123.305	-0.586514	0.299008	-1.96153	0.0498171	0.758077
MGP_BALBcJ_G0033942__Ccl22	22.7961	-1.90676	0.972482	-1.96072	0.0499123	0.758077
MGP_BALBcJ_G0034186__Fbxo31	904.019	1.30905	0.670324	1.95286	0.0508363	0.758077
MGP_BALBcJ_G0034272__Nrp1	1506.42	-0.413448	0.211592	-1.95398	0.050703	0.758077
MGP_BALBcJ_G0034810__Chrnb4	4.97193	-2.48024	1.26943	-1.95382	0.0507223	0.758077
MGP_BALBcJ_G0034877__Pkm	22968.4	0.299744	0.154245	1.94329	0.0519806	0.758077
MGP_BALBcJ_G0034928__Ubap1l	4.35464	1.72958	0.889061	1.9454	0.0517264	0.758077
MGP_BALBcJ_G0035317__Dhx30	1350.93	-0.145188	0.0747113	-1.94331	0.0519782	0.758077
MGP_BALBcJ_G0035516__Tbc1d25	601.366	0.305232	0.155513	1.96275	0.0496753	0.758077
MGP_BALBcJ_G0035585__Dock11	253.569	-0.709511	0.363466	-1.95207	0.0509301	0.758077
MGP_BALBcJ_G0035856__5430427O19Rik	33.3304	-1.04609	0.536673	-1.94921	0.0512709	0.758077
MGP_BALBcJ_G0036003__Apool	627.187	0.26118	0.134061	1.94823	0.051388	0.758077
MGP_BALBcJ_G0039828__NA	6.6862	-1.50609	0.773807	-1.94634	0.0516143	0.758077
MGP_BALBcJ_G0001404__NA	6.51678	1.83607	0.946457	1.93995	0.0523863	0.758224
MGP_BALBcJ_G0004369__Gm15873	14.3729	0.851901	0.440776	1.93273	0.0532693	0.758224
MGP_BALBcJ_G0011271__NA	831.855	0.19976	0.103332	1.93319	0.0532127	0.758224
MGP_BALBcJ_G0017163__Nus1	3779.05	-0.172133	0.0886736	-1.9412	0.0522338	0.758224
MGP_BALBcJ_G0017432__Dazap1	1396.75	0.150236	0.0775219	1.93799	0.0526248	0.758224
MGP_BALBcJ_G0017442__Uqcr11	1138.2	0.151504	0.0784117	1.93215	0.0533405	0.758224
MGP_BALBcJ_G0017806__Myl6	10092.1	0.127448	0.0658741	1.93472	0.0530252	0.758224
MGP_BALBcJ_G0018437__Cfap52	1.60342	3.47256	1.7912	1.93868	0.0525402	0.758224
MGP_BALBcJ_G0019802__NA	82.5891	1.01259	0.522941	1.93633	0.052827	0.758224
MGP_BALBcJ_G0019832__Srsf5	9975.73	0.141255	0.0728838	1.93809	0.052612	0.758224
MGP_BALBcJ_G0019967__Fbln5	690.765	-0.518585	0.267991	-1.93508	0.0529804	0.758224
MGP_BALBcJ_G0020166__Ryr2	5.00902	-1.58015	0.815089	-1.93863	0.052547	0.758224
MGP_BALBcJ_G0020380__Serpinb6b	111.873	-0.697323	0.359464	-1.9399	0.052392	0.758224
MGP_BALBcJ_G0020714__Ahrr	5.99202	-1.75557	0.90426	-1.94145	0.0522042	0.758224
MGP_BALBcJ_G0020902__Snx18	1680.96	-0.183125	0.0947452	-1.93282	0.0532587	0.758224
MGP_BALBcJ_G0021527__Htr2a	4.09863	2.31301	1.19532	1.93506	0.052983	0.758224
MGP_BALBcJ_G0022008__Tst	448.457	-0.392733	0.203268	-1.9321	0.0533473	0.758224
MGP_BALBcJ_G0023343__Mettl26	543.267	0.312824	0.161547	1.93642	0.052816	0.758224
MGP_BALBcJ_G0023983__Fbxo34	13.637	0.995086	0.513967	1.93609	0.0528567	0.758224
MGP_BALBcJ_G0024079__Mettl4	235.513	-0.286936	0.147953	-1.93938	0.0524556	0.758224
MGP_BALBcJ_G0026272__Scg5	3.54025	-2.4586	1.27222	-1.93253	0.0532943	0.758224
MGP_BALBcJ_G0026337__Pla2g4f	111.349	-0.673081	0.346664	-1.94159	0.0521862	0.758224
MGP_BALBcJ_G0026513__Rassf2	704.941	-0.501203	0.258836	-1.93637	0.0528225	0.758224
MGP_BALBcJ_G0026698__Chmp4b	4563.26	0.138291	0.0715574	1.93259	0.0532868	0.758224
MGP_BALBcJ_G0026783__Lpin3	559.738	0.297454	0.153675	1.93561	0.0529154	0.758224
MGP_BALBcJ_G0027928__Clca2	441.34	0.695689	0.359128	1.93716	0.0527254	0.758224
MGP_BALBcJ_G0027984__Ankrd13c	1446	-0.164853	0.0850439	-1.93845	0.0525688	0.758224
MGP_BALBcJ_G0028773__Zmym1	263.783	0.236298	0.12229	1.93227	0.0533258	0.758224
MGP_BALBcJ_G0029286__Magi2	26.9329	-0.739603	0.381347	-1.93945	0.0524464	0.758224
MGP_BALBcJ_G0030464__Cped1	488.31	-0.291305	0.150426	-1.93654	0.0528022	0.758224
MGP_BALBcJ_G0031018__Klf15	227.218	0.92238	0.477013	1.93366	0.053155	0.758224
MGP_BALBcJ_G0033858__Rnaseh2a	513.224	0.277665	0.14359	1.93374	0.0531455	0.758224
MGP_BALBcJ_G0034997__Pigb	497.74	0.242661	0.125177	1.93855	0.052556	0.758224
MGP_BALBcJ_G0035282__Arih2	1725.6	0.228327	0.117762	1.93889	0.0525151	0.758224
MGP_BALBcJ_G0003063__Ict1os	2.19784	3.39586	1.76386	1.92525	0.0541984	0.758826
MGP_BALBcJ_G0009910__Hyi	155.983	0.358076	0.185705	1.9282	0.0538308	0.758826
MGP_BALBcJ_G0010789__NA	76.0938	0.527886	0.274528	1.92289	0.0544943	0.758826
MGP_BALBcJ_G0011812__NA	10.7618	-1.34019	0.696273	-1.9248	0.0542538	0.758826
MGP_BALBcJ_G0016073__Rpl37a	2169.88	0.114535	0.0594035	1.92809	0.053844	0.758826
MGP_BALBcJ_G0017252__Herc4	1131.55	0.168875	0.0875089	1.9298	0.0536312	0.758826
MGP_BALBcJ_G0017490__Cactin	710.453	0.202881	0.10514	1.92962	0.0536538	0.758826
MGP_BALBcJ_G0018358__Drg2	810.876	0.172299	0.089623	1.92249	0.0545446	0.758826
MGP_BALBcJ_G0018473__Tmem88	67.6262	-0.51364	0.266454	-1.92768	0.0538945	0.758826
MGP_BALBcJ_G0019327__Ict1	426.856	0.244868	0.127203	1.92502	0.0542274	0.758826
MGP_BALBcJ_G0020081__Apopt1	486.338	0.28482	0.148147	1.92255	0.054537	0.758826
MGP_BALBcJ_G0021086__Ankrd28	1301.67	0.217031	0.11246	1.92986	0.0536247	0.758826
MGP_BALBcJ_G0022361__Krt8	13783.8	0.383229	0.199444	1.92149	0.0546698	0.758826
MGP_BALBcJ_G0022370__Itgb7	122.916	-1.50726	0.783625	-1.92344	0.0544245	0.758826
MGP_BALBcJ_G0022936__Ncam2	4.38079	1.6915	0.878778	1.92483	0.0542506	0.758826
MGP_BALBcJ_G0023812__Gm20517	5.95631	1.82054	0.946019	1.92442	0.0543016	0.758826
MGP_BALBcJ_G0024053__Epas1	4450.48	-0.175126	0.091117	-1.92199	0.054607	0.758826
MGP_BALBcJ_G0024117__Riok3	3519.17	0.299585	0.155788	1.92302	0.0544771	0.758826
MGP_BALBcJ_G0025704__Neb	8.21977	-1.25294	0.649256	-1.92981	0.0536299	0.758826
MGP_BALBcJ_G0026633__Sox12	99.4529	0.550898	0.285605	1.92888	0.0537455	0.758826
MGP_BALBcJ_G0026659__Pdrg1	988.505	-0.258839	0.134472	-1.92485	0.0542484	0.758826
MGP_BALBcJ_G0028035__Slc26a7	15.3555	1.44833	0.752277	1.92526	0.0541965	0.758826
MGP_BALBcJ_G0028300__D630039A03Rik	102.623	0.857547	0.446036	1.92259	0.054531	0.758826
MGP_BALBcJ_G0029283__Cd36	22025	-0.40668	0.211616	-1.92179	0.0546328	0.758826
MGP_BALBcJ_G0029610__Fip1l1	1591.55	-0.15702	0.0814923	-1.92681	0.0540039	0.758826
MGP_BALBcJ_G0030346__Cpsf4	745.076	0.22831	0.118407	1.92818	0.0538333	0.758826
MGP_BALBcJ_G0030981__Copg1	3844.15	-0.143991	0.0746459	-1.92899	0.0537321	0.758826
MGP_BALBcJ_G0031291__Ccnd2	830.026	-0.516369	0.268683	-1.92185	0.0546242	0.758826
MGP_BALBcJ_G0031325__Clec9a	27.9172	-1.12848	0.585792	-1.92642	0.0540516	0.758826
MGP_BALBcJ_G0032238__Lmtk3	43.1059	-0.641962	0.332902	-1.92838	0.053808	0.758826
MGP_BALBcJ_G0032754__NA	57.7362	-0.640442	0.332602	-1.92555	0.0541609	0.758826
MGP_BALBcJ_G0034245__Agt	244.055	-0.487935	0.25388	-1.92192	0.0546164	0.758826
MGP_BALBcJ_G0035545__Gpr34	121.993	-0.730969	0.379208	-1.92762	0.0539028	0.758826
MGP_BALBcJ_G0035823__Mpp1	1586.31	-0.358836	0.186451	-1.92456	0.0542844	0.758826
MGP_BALBcJ_G0000823__NA	7.10275	-1.28168	0.66741	-1.92038	0.0548093	0.758848
MGP_BALBcJ_G0015163__Gm20535	2.09876	-3.1865	1.65985	-1.91976	0.0548887	0.758848
MGP_BALBcJ_G0017696__Lyz2	4693.67	-0.686453	0.357449	-1.92042	0.0548044	0.758848
MGP_BALBcJ_G0018375__Aldh3a2	1894.04	0.235993	0.123065	1.91762	0.0551592	0.758848
MGP_BALBcJ_G0019386__Mfsd11	2548.69	-0.262053	0.136741	-1.91642	0.0553115	0.758848
MGP_BALBcJ_G0020171__Edaradd	15.0801	-0.923684	0.481921	-1.91667	0.0552797	0.758848
MGP_BALBcJ_G0020179__Nid1	4159.52	-0.402406	0.20989	-1.91723	0.0552089	0.758848
MGP_BALBcJ_G0022308__Lima1	6986.89	-0.239198	0.12473	-1.91772	0.0551461	0.758848
MGP_BALBcJ_G0022337__Krt7	1360.36	0.564999	0.294643	1.91757	0.0551653	0.758848
MGP_BALBcJ_G0023866__Fsd1	2.22163	-2.69286	1.40376	-1.91832	0.0550708	0.758848
MGP_BALBcJ_G0026191__Depdc7	421.555	0.69365	0.36184	1.91701	0.0552372	0.758848
MGP_BALBcJ_G0026565__Sec23b	1917.07	-0.20948	0.109062	-1.92075	0.0547638	0.758848
MGP_BALBcJ_G0030496__Lep	505.257	-0.6142	0.320425	-1.91683	0.0552592	0.758848
MGP_BALBcJ_G0031251__P3h3	313.449	-0.331056	0.17254	-1.91873	0.0550191	0.758848
MGP_BALBcJ_G0031414__Arhgdib	607.581	-0.795776	0.414782	-1.91854	0.0550422	0.758848
MGP_BALBcJ_G0031634__Rps5	6238.53	0.141097	0.073562	1.91808	0.0551015	0.758848
MGP_BALBcJ_G0033288__Mcoln1	1885.79	-0.208799	0.108825	-1.91866	0.0550277	0.758848
MGP_BALBcJ_G0003805__6330410L21Rik	3.52391	2.53767	1.32464	1.91575	0.0553972	0.759507
MGP_BALBcJ_G0022477__Socs1	14.3451	-1.35318	0.706487	-1.91536	0.0554468	0.75967
MGP_BALBcJ_G0021942__NA	3442.65	0.272443	0.142308	1.91446	0.0555611	0.760114
MGP_BALBcJ_G0030269__Gpr146	1852.23	0.379946	0.198486	1.91422	0.0555923	0.760114
MGP_BALBcJ_G0035775__Trex2	3.85853	2.21747	1.15817	1.91463	0.0555395	0.760114
MGP_BALBcJ_G0005412__Gm16984	14.6873	-0.92263	0.482943	-1.91043	0.0560776	0.761749
MGP_BALBcJ_G0005548__4930556M19Rik	9.84323	1.28314	0.672743	1.90733	0.0564781	0.761749
MGP_BALBcJ_G0010205__NA	34.03	0.625446	0.327784	1.9081	0.0563778	0.761749
MGP_BALBcJ_G0013877__NA	7.84112	-1.25645	0.657623	-1.91059	0.0560578	0.761749
MGP_BALBcJ_G0015814__Gsta3	836.036	0.568648	0.297847	1.9092	0.0562368	0.761749
MGP_BALBcJ_G0016981__Ifngr1	2119.89	0.235082	0.123268	1.90708	0.0565104	0.761749
MGP_BALBcJ_G0017080__Tspyl4	145.713	-0.460963	0.241541	-1.90843	0.0563357	0.761749
MGP_BALBcJ_G0018397__Trpv2	166.116	-0.716108	0.374626	-1.91153	0.0559368	0.761749
MGP_BALBcJ_G0019298__Rpl38	1960.43	0.136495	0.0715823	1.90682	0.0565434	0.761749
MGP_BALBcJ_G0020796__F2rl2	3.64475	-2.40667	1.25986	-1.91028	0.0560977	0.761749
MGP_BALBcJ_G0022324__Bin2	214.733	-0.830349	0.434325	-1.91181	0.0558999	0.761749
MGP_BALBcJ_G0023613__Flot1	1808.36	0.352998	0.18476	1.91057	0.0560594	0.761749
MGP_BALBcJ_G0024165__2700062C07Rik	291.243	0.22688	0.118846	1.90903	0.0562588	0.761749
MGP_BALBcJ_G0026921__Rtfdc1	1775.58	0.174603	0.0915446	1.9073	0.0564816	0.761749
MGP_BALBcJ_G0026949__NA	110.597	-0.840698	0.440176	-1.90992	0.056144	0.761749
MGP_BALBcJ_G0027997__Chchd7	209.643	0.289162	0.151461	1.90916	0.0562418	0.761749
MGP_BALBcJ_G0028022__1110037F02Rik	1774.17	-0.112403	0.0589345	-1.90725	0.0564888	0.761749
MGP_BALBcJ_G0029181__Mmel1	1.91302	-3.36598	1.7648	-1.90729	0.0564826	0.761749
MGP_BALBcJ_G0029442__Tnip2	827.571	0.229665	0.120219	1.91039	0.0560833	0.761749
MGP_BALBcJ_G0030842__Kdm3a	1769.53	0.30623	0.160272	1.91069	0.0560439	0.761749
MGP_BALBcJ_G0031107__Creld1	416.951	-0.210146	0.110066	-1.90927	0.0562271	0.761749
MGP_BALBcJ_G0033825__Il27ra	68.1729	-1.25897	0.660158	-1.90707	0.0565119	0.761749
MGP_BALBcJ_G0001171__NA	4.7742	-1.80892	0.95021	-1.90371	0.0569485	0.762804
MGP_BALBcJ_G0017653__Ppp1r12a	2859.66	-0.17999	0.0944588	-1.90549	0.0567168	0.762804
MGP_BALBcJ_G0017919__Tbc1d10a	616.563	-0.287762	0.151058	-1.90498	0.0567825	0.762804
MGP_BALBcJ_G0022290__Mcrs1	915.322	0.234229	0.122896	1.90591	0.0566624	0.762804
MGP_BALBcJ_G0023084__NA	1238.68	-0.231592	0.121643	-1.90387	0.0569275	0.762804
MGP_BALBcJ_G0027081__Nceh1	725.963	-0.601682	0.315813	-1.90519	0.0567559	0.762804
MGP_BALBcJ_G0031782__Pvr	807.804	0.360214	0.189228	1.9036	0.0569624	0.762804
MGP_BALBcJ_G0033028__Phkg2	944.585	0.196982	0.103475	1.90367	0.0569533	0.762804
MGP_BALBcJ_G0033291__Camsap3	1410.81	0.303951	0.159581	1.90468	0.0568214	0.762804
MGP_BALBcJ_G0027546__Mllt11	198.541	0.285072	0.149807	1.90293	0.0570502	0.762966
MGP_BALBcJ_G0033779__Ednra	215.757	-0.464282	0.24395	-1.90318	0.0570169	0.762966
MGP_BALBcJ_G0015065__A330023F24Rik	256.937	0.521483	0.274311	1.90107	0.0572935	0.763611
MGP_BALBcJ_G0016401__Slc26a9	29.2038	-1.16876	0.61541	-1.89915	0.0575449	0.763611
MGP_BALBcJ_G0018052__Eml6	36.1186	-0.615984	0.324356	-1.8991	0.0575515	0.763611
MGP_BALBcJ_G0019027__Krt222	13.7359	-1.0177	0.535571	-1.90021	0.0574054	0.763611
MGP_BALBcJ_G0023066__Zbtb21	462.078	-0.285823	0.1505	-1.89915	0.0575444	0.763611
MGP_BALBcJ_G0025178__Mfsd13a	492.133	0.327321	0.172085	1.90209	0.0571595	0.763611
MGP_BALBcJ_G0027255__Rarres1	119.913	1.13925	0.599289	1.901	0.0573022	0.763611
MGP_BALBcJ_G0031235__NA	19.3403	0.783134	0.412318	1.89935	0.057519	0.763611
MGP_BALBcJ_G0031897__Sertad1	404.784	0.370188	0.19493	1.89909	0.0575531	0.763611
MGP_BALBcJ_G0032090__Pop4	254.187	0.376039	0.197815	1.90096	0.0573076	0.763611
MGP_BALBcJ_G0033787__Mmaa	345.068	-0.333056	0.175236	-1.90061	0.0573529	0.763611
MGP_BALBcJ_G0033816__Adgre5	1200.29	-0.277857	0.146116	-1.90162	0.0572209	0.763611
MGP_BALBcJ_G0030990__Sec61a1	8263.28	-0.262976	0.138524	-1.89842	0.057641	0.764274
MGP_BALBcJ_G0031134__Cand2	280.722	0.418483	0.220514	1.89776	0.0577279	0.764923
MGP_BALBcJ_G0000006__Ighg2b	109.385	-0.904131	0.477452	-1.89366	0.0582702	0.765826
MGP_BALBcJ_G0000626__NA	2.02841	-5.24038	2.76654	-1.8942	0.0581985	0.765826
MGP_BALBcJ_G0005527__4931440J10Rik	1.15591	4.07076	2.14755	1.89554	0.0580209	0.765826
MGP_BALBcJ_G0008278__Mirlet7e	10.7183	1.08927	0.575239	1.8936	0.058278	0.765826
MGP_BALBcJ_G0017446__Rexo1	1273.65	0.177512	0.0937474	1.89351	0.05829	0.765826
MGP_BALBcJ_G0020825__Zfp366	100.887	-0.525558	0.277386	-1.89468	0.0581347	0.765826
MGP_BALBcJ_G0021369__Cryl1	367.354	0.31989	0.168934	1.89358	0.0582803	0.765826
MGP_BALBcJ_G0023448__Ubash3a	4.58117	-2.2349	1.17854	-1.89633	0.0579162	0.765826
MGP_BALBcJ_G0024328__Pcdh12	90.6408	-0.64541	0.340542	-1.89524	0.0580601	0.765826
MGP_BALBcJ_G0025666__Zbtb6	529.267	-0.211767	0.111772	-1.89463	0.0581412	0.765826
MGP_BALBcJ_G0030757__Ccdc129	2058.65	-0.893811	0.471287	-1.89653	0.0578894	0.765826
MGP_BALBcJ_G0033490__Tti2	333.937	0.25455	0.134315	1.89518	0.058069	0.765826
MGP_BALBcJ_G0039022__Snord17	2.8375	-2.29716	1.21299	-1.8938	0.0582522	0.765826
MGP_BALBcJ_G0019962__Gpr68	15.9781	-1.1682	0.617127	-1.89296	0.0583632	0.766288
MGP_BALBcJ_G0034456__Rp9	1049.13	0.246855	0.130432	1.89259	0.0584121	0.766431
MGP_BALBcJ_G0027890__Dapp1	285.502	-0.542954	0.287104	-1.89114	0.0586058	0.768078
MGP_BALBcJ_G0030877__Reg3g	9.56505	1.5782	0.834548	1.89108	0.0586139	0.768078
MGP_BALBcJ_G0026427__1810024B03Rik	13.7116	0.940601	0.497613	1.89023	0.0587276	0.76821
MGP_BALBcJ_G0027861__Dkk2	19.7643	-0.820891	0.434334	-1.89	0.0587584	0.76821
MGP_BALBcJ_G0030569__NA	2541.68	-0.188373	0.0996753	-1.88986	0.0587764	0.76821
MGP_BALBcJ_G0035788__Pdzd4	124.382	0.582559	0.308246	1.88991	0.0587694	0.76821
MGP_BALBcJ_G0018290__Zfp672	699.593	-0.180567	0.0955804	-1.88916	0.0588706	0.768444
MGP_BALBcJ_G0021669__Egflam	190.116	-0.450638	0.238525	-1.88927	0.0588551	0.768444
MGP_BALBcJ_G0019476__Csnk1d	3528.86	0.15813	0.0837287	1.8886	0.0589453	0.768922
MGP_BALBcJ_G0019010__Psmd3	4272.16	0.213007	0.112868	1.88722	0.0591303	0.768993
MGP_BALBcJ_G0019418__Tbc1d16	353.237	-0.44956	0.238167	-1.88759	0.0590816	0.768993
MGP_BALBcJ_G0023286__Msrb1	4065.91	0.250331	0.132667	1.88691	0.0591718	0.768993
MGP_BALBcJ_G0023292__Nubp2	666.058	0.242434	0.128441	1.88751	0.0590918	0.768993
MGP_BALBcJ_G0031773__Apoe	8712.37	-0.427194	0.226405	-1.88686	0.0591797	0.768993
MGP_BALBcJ_G0034444__Zfp653	218.923	0.367092	0.194451	1.88784	0.0590479	0.768993
MGP_BALBcJ_G0008053__Mir24-1	43.5031	0.968244	0.513942	1.88396	0.0595709	0.769611
MGP_BALBcJ_G0015933__Gm5269	1.64333	3.37179	1.78843	1.88534	0.0593844	0.769611
MGP_BALBcJ_G0017966__Myo1g	258.503	-0.767058	0.40687	-1.88527	0.059394	0.769611
MGP_BALBcJ_G0017973__Adcy1	15.27	-1.31423	0.696852	-1.88595	0.0593019	0.769611
MGP_BALBcJ_G0018897__Cacna1g	157.434	-0.676034	0.358556	-1.88543	0.0593716	0.769611
MGP_BALBcJ_G0022947__Rwdd2b	166.828	0.329494	0.174833	1.88462	0.0594808	0.769611
MGP_BALBcJ_G0024450__Grpel2	770.292	-0.170713	0.0905689	-1.88489	0.0594445	0.769611
MGP_BALBcJ_G0026825__Rbpjl	2.74887	-2.79485	1.48336	-1.88413	0.059547	0.769611
MGP_BALBcJ_G0038490__Gm24119	10.8533	1.20769	0.640881	1.88442	0.0595082	0.769611
MGP_BALBcJ_G0015986__Aox2	1.23462	-3.74733	1.99055	-1.88256	0.0597599	0.769959
MGP_BALBcJ_G0017570__Sycp3	42.1364	0.958354	0.509188	1.88212	0.0598194	0.769959
MGP_BALBcJ_G0028504__Ttc22	299.292	0.530244	0.281735	1.88207	0.0598272	0.769959
MGP_BALBcJ_G0029012__Padi4	93.0003	0.83073	0.441212	1.88284	0.0597227	0.769959
MGP_BALBcJ_G0034056__Zfp90	271.625	0.37114	0.197187	1.88218	0.0598122	0.769959
MGP_BALBcJ_G0035689__Plac1	2.31185	-3.42419	1.81851	-1.88297	0.0597045	0.769959
MGP_BALBcJ_G0022607__Abcc5	724.402	-0.436614	0.232057	-1.8815	0.0599046	0.769972
MGP_BALBcJ_G0025270__Grk5	433.453	-0.256268	0.136185	-1.88177	0.0598674	0.769972
MGP_BALBcJ_G0004561__Gm27011	10.9002	1.26145	0.672743	1.87509	0.0607806	0.770528
MGP_BALBcJ_G0005580__1700001L05Rik	285.976	0.598367	0.318213	1.8804	0.0600536	0.770528
MGP_BALBcJ_G0006625__Gm3716	10.3825	-1.2252	0.652379	-1.87805	0.0603742	0.770528
MGP_BALBcJ_G0020690__Adamts16	8.1801	-1.90044	1.01184	-1.87821	0.0603526	0.770528
MGP_BALBcJ_G0020999__Camk2g	974.451	0.143184	0.0763637	1.87503	0.0607889	0.770528
MGP_BALBcJ_G0021061__Mustn1	136.383	0.420476	0.223729	1.8794	0.0601897	0.770528
MGP_BALBcJ_G0021422__Fdft1	901.93	0.209969	0.111834	1.8775	0.0604492	0.770528
MGP_BALBcJ_G0021472__Dock5	710.952	0.33099	0.17628	1.87764	0.0604301	0.770528
MGP_BALBcJ_G0021511__Dmtn	305.459	0.328246	0.174761	1.87826	0.0603457	0.770528
MGP_BALBcJ_G0022549__P2rx6	42.1342	0.765303	0.40806	1.87547	0.0607287	0.770528
MGP_BALBcJ_G0023734__Adgrf1	590.677	0.585665	0.311715	1.87885	0.0602656	0.770528
MGP_BALBcJ_G0024166__Rprd1a	792.966	-0.227525	0.121343	-1.87505	0.0607859	0.770528
MGP_BALBcJ_G0025107__Hoga1	123.6	0.680558	0.362105	1.87945	0.0601834	0.770528
MGP_BALBcJ_G0027909__Pdlim5	2723.56	0.393313	0.209323	1.87897	0.060248	0.770528
MGP_BALBcJ_G0028038__Tmem55a	886.339	-0.183528	0.0978434	-1.87573	0.0606924	0.770528
MGP_BALBcJ_G0030203__Ephb4	1259.18	0.165221	0.0880679	1.87606	0.060647	0.770528
MGP_BALBcJ_G0030759__Pde1c	6.915	-1.62223	0.864125	-1.87731	0.0604753	0.770528
MGP_BALBcJ_G0031024__Fbln2	3362.3	-0.390563	0.208186	-1.87603	0.0606516	0.770528
MGP_BALBcJ_G0031679__Slc8a2	15.439	-0.940371	0.501214	-1.87619	0.0606298	0.770528
MGP_BALBcJ_G0033819__Asf1b	56.6115	0.84546	0.449831	1.8795	0.0601757	0.770528
MGP_BALBcJ_G0034505__Ddx25	1.49891	-3.66783	1.95533	-1.87581	0.0606813	0.770528
MGP_BALBcJ_G0034660__Usp2	351.457	-0.400247	0.212858	-1.88035	0.0600609	0.770528
MGP_BALBcJ_G0001654__NA	6.0959	-1.61002	0.862643	-1.86638	0.0619885	0.771726
MGP_BALBcJ_G0001661__NA	1.10599	3.96059	2.12621	1.86275	0.062498	0.771726
MGP_BALBcJ_G0008710__Mir31	19.4723	-1.08789	0.582214	-1.86854	0.0616871	0.771726
MGP_BALBcJ_G0011137__NA	122.888	0.531151	0.283692	1.87228	0.061168	0.771726
MGP_BALBcJ_G0011382__NA	6.48991	-1.3395	0.718333	-1.86474	0.062218	0.771726
MGP_BALBcJ_G0013922__NA	2.19346	2.90919	1.56212	1.86233	0.062556	0.771726
MGP_BALBcJ_G0014604__NA	1.2041	3.99652	2.14537	1.86286	0.0624824	0.771726
MGP_BALBcJ_G0017111__Zbtb24	429.377	-0.206049	0.110197	-1.86983	0.0615075	0.771726
MGP_BALBcJ_G0017318__Pcnt	984.702	0.313767	0.168325	1.86406	0.0623139	0.771726
MGP_BALBcJ_G0018025__Fam161a	72.803	0.73355	0.3939	1.86227	0.0625645	0.771726
MGP_BALBcJ_G0018383__Grap	147.9	-0.600213	0.321688	-1.86583	0.0620657	0.771726
MGP_BALBcJ_G0018573__Med31	154.212	0.314421	0.167903	1.87264	0.0611184	0.771726
MGP_BALBcJ_G0018644__Hic1	109.937	-0.567501	0.302919	-1.87344	0.0610078	0.771726
MGP_BALBcJ_G0018918__Dlx3	3.7579	-2.46116	1.31893	-1.86603	0.0620377	0.771726
MGP_BALBcJ_G0019094__Jup	6458.96	0.220627	0.117906	1.87122	0.0613151	0.771726
MGP_BALBcJ_G0019737__L2hgdh	346.678	-0.237742	0.127277	-1.86791	0.0617744	0.771726
MGP_BALBcJ_G0019819__Rdh12	40.1628	-1.29149	0.693482	-1.86232	0.0625574	0.771726
MGP_BALBcJ_G0021683__Il7r	164.039	-1.0787	0.577481	-1.86794	0.0617704	0.771726
MGP_BALBcJ_G0023329__Narfl	562.687	0.209761	0.112297	1.86792	0.0617737	0.771726
MGP_BALBcJ_G0024026__NA	321.529	0.235796	0.125824	1.87402	0.0609282	0.771726
MGP_BALBcJ_G0024052__Gm10309	6.72633	1.88055	1.00658	1.86826	0.0617264	0.771726
MGP_BALBcJ_G0024128__Gm5160	25.6954	0.801904	0.429441	1.86732	0.0618571	0.771726
MGP_BALBcJ_G0024609__BC021614	16.1538	1.19966	0.64296	1.86585	0.0620629	0.771726
MGP_BALBcJ_G0025842__Ttn	11.9076	-1.74928	0.934558	-1.87177	0.0612385	0.771726
MGP_BALBcJ_G0027986__Lrrc40	402.786	0.238538	0.128081	1.8624	0.0625463	0.771726
MGP_BALBcJ_G0028017__Trp53inp1	9189.81	0.63142	0.339113	1.86198	0.0626065	0.771726
MGP_BALBcJ_G0028278__Abca1	11769	-0.371552	0.199545	-1.862	0.0626038	0.771726
MGP_BALBcJ_G0028597__NA	283.046	0.228632	0.122166	1.87148	0.0612781	0.771726
MGP_BALBcJ_G0028694__Gm8439	163.717	0.914624	0.489258	1.86941	0.0615658	0.771726
MGP_BALBcJ_G0029225__Tnfrsf18	50.2143	0.566565	0.304231	1.86228	0.0625634	0.771726
MGP_BALBcJ_G0029999__NA	9381.14	0.117379	0.0629676	1.86411	0.0623061	0.771726
MGP_BALBcJ_G0030132__Ncf1	477.572	-0.561527	0.300279	-1.87002	0.0614813	0.771726
MGP_BALBcJ_G0030828__Tacstd2	179.149	0.824647	0.44148	1.86791	0.0617742	0.771726
MGP_BALBcJ_G0031102__Rpusd3	88.0447	0.411006	0.220023	1.86801	0.0617602	0.771726
MGP_BALBcJ_G0032290__Htatip2	813.178	0.21606	0.115655	1.86814	0.0617427	0.771726
MGP_BALBcJ_G0032515__Aqp11	50.0093	1.15767	0.618322	1.87227	0.0611693	0.771726
MGP_BALBcJ_G0032749__Taf10	1010.05	0.191248	0.102401	1.86764	0.0618124	0.771726
MGP_BALBcJ_G0033120__Mgmt	176.061	0.391448	0.209586	1.86772	0.0618014	0.771726
MGP_BALBcJ_G0033260__Tnfrsf26	47.3232	-1.02974	0.55256	-1.86358	0.0623803	0.771726
MGP_BALBcJ_G0034403__Mrpl4	824.169	0.157954	0.0847224	1.86438	0.062269	0.771726
MGP_BALBcJ_G0035055__Lca5	26.2665	-0.692189	0.370001	-1.87078	0.0613763	0.771726
MGP_BALBcJ_G0035716__Cd40lg	1.6009	-3.78504	2.02896	-1.86551	0.0621099	0.771726
MGP_BALBcJ_G0035981__P2ry10	39.3163	-1.24845	0.669656	-1.86431	0.0622779	0.771726
MGP_BALBcJ_G0039798__NA	1582.18	-0.284734	0.152041	-1.87274	0.0611042	0.771726
MGP_BALBcJ_G0040145__NA	1.71724	-3.89602	2.08755	-1.86631	0.0619978	0.771726
MGP_BALBcJ_G0019354__Unk	667.135	0.184977	0.099429	1.86039	0.0628297	0.772116
MGP_BALBcJ_G0020404__Fam217a	7.45528	-1.39306	0.748455	-1.86125	0.0627087	0.772116
MGP_BALBcJ_G0022629__Tmem41a	311.963	0.304704	0.163756	1.86072	0.0627837	0.772116
MGP_BALBcJ_G0033628__NA	178.756	-0.685554	0.368491	-1.86043	0.0628241	0.772116
MGP_BALBcJ_G0034706__BC049352	3.55141	-1.846	0.992001	-1.86088	0.0627608	0.772116
MGP_BALBcJ_G0033094__Chst15	363.856	-0.273802	0.147222	-1.85979	0.0629154	0.772698
MGP_BALBcJ_G0020032__Bdkrb1	2.29137	4.16434	2.24127	1.85803	0.0631649	0.773462
MGP_BALBcJ_G0023738__Pla2g7	883.523	-0.531284	0.285863	-1.85852	0.0630947	0.773462
MGP_BALBcJ_G0029463__Sorcs2	679.55	0.374108	0.201251	1.85891	0.0630397	0.773462
MGP_BALBcJ_G0033584__Dctd	110.803	-0.593871	0.31963	-1.858	0.0631695	0.773462
MGP_BALBcJ_G0039924__NA	200.096	-0.255843	0.137695	-1.85804	0.0631635	0.773462
MGP_BALBcJ_G0019526__Hs1bp3	776.079	-0.303977	0.163767	-1.85615	0.0634322	0.774326
MGP_BALBcJ_G0028759__Col8a2	23.1488	-1.15051	0.619779	-1.85633	0.0634069	0.774326
MGP_BALBcJ_G0030505__Ccdc136	79.4722	-0.522007	0.281068	-1.85723	0.0632787	0.774326
MGP_BALBcJ_G0030801__Gprin3	156.216	-0.434486	0.234076	-1.85617	0.0634291	0.774326
MGP_BALBcJ_G0032947__Tnrc6a	3489.88	0.300819	0.162014	1.85675	0.0633468	0.774326
MGP_BALBcJ_G0026596__Cst3	8276.93	-0.329383	0.177598	-1.85465	0.0636457	0.775697
MGP_BALBcJ_G0031320__Cd69	15.4973	-1.30758	0.705165	-1.85428	0.0636984	0.775697
MGP_BALBcJ_G0034695__Ube4a	3163.67	-0.120356	0.064905	-1.85434	0.0636904	0.775697
MGP_BALBcJ_G0034874__Hexa	1238.41	-0.631978	0.340729	-1.85478	0.0636273	0.775697
MGP_BALBcJ_G0002213__NA	8.39996	-1.52257	0.823703	-1.84845	0.0645375	0.775716
MGP_BALBcJ_G0002547__Trbv19	1.69585	-4.86278	2.63059	-1.84855	0.0645226	0.775716
MGP_BALBcJ_G0014920__NA	11.1116	-1.13133	0.612259	-1.84779	0.0646328	0.775716
MGP_BALBcJ_G0016992__Pde7b	572.927	-0.457065	0.246658	-1.85303	0.0638779	0.775716
MGP_BALBcJ_G0017690__Lrrc10	35.2559	-0.70162	0.379047	-1.85101	0.064168	0.775716
MGP_BALBcJ_G0018090__Kcnmb1	96.851	-0.555722	0.300922	-1.84673	0.064786	0.775716
MGP_BALBcJ_G0018124__Ebf1	368.178	-0.352655	0.191105	-1.84534	0.0649878	0.775716
MGP_BALBcJ_G0018977__Pcgf2	873.104	0.317468	0.171262	1.8537	0.0637828	0.775716
MGP_BALBcJ_G0020585__Slc28a3	9863.25	0.622024	0.337106	1.84519	0.0650102	0.775716
MGP_BALBcJ_G0020657__Zfp595	78.1819	-0.428395	0.231493	-1.85057	0.0642313	0.775716
MGP_BALBcJ_G0020848__Pik3r1	24213.4	-0.14946	0.0808138	-1.84944	0.0643949	0.775716
MGP_BALBcJ_G0020988__Anxa7	3614.83	0.192874	0.104213	1.85077	0.0642024	0.775716
MGP_BALBcJ_G0021272__Mmp14	2451.04	-0.395217	0.213976	-1.84702	0.0647441	0.775716
MGP_BALBcJ_G0021716__Gm5468	1.5128	-3.39507	1.83316	-1.85203	0.0640209	0.775716
MGP_BALBcJ_G0022758__Slc15a2	911.758	0.427592	0.23073	1.85322	0.0638512	0.775716
MGP_BALBcJ_G0023427__NA	274.109	-0.580307	0.314148	-1.84724	0.0647121	0.775716
MGP_BALBcJ_G0023509__Pfdn6	561.122	0.208264	0.112818	1.84601	0.0648901	0.775716
MGP_BALBcJ_G0024948__Anxa1	8539.31	0.419829	0.22714	1.84832	0.0645555	0.775716
MGP_BALBcJ_G0027396__Thbs3	296.22	-0.345702	0.186973	-1.84894	0.0644669	0.775716
MGP_BALBcJ_G0027510__S100a11	3638.21	0.264578	0.142874	1.85183	0.0640503	0.775716
MGP_BALBcJ_G0027796__Ptbp2	974.598	0.285184	0.154103	1.85061	0.0642261	0.775716
MGP_BALBcJ_G0027940__Lpar3	4.94334	-1.95822	1.05644	-1.85361	0.0637951	0.775716
MGP_BALBcJ_G0028206__Glipr2	379.668	0.471742	0.255596	1.84566	0.0649422	0.775716
MGP_BALBcJ_G0029393__Snx17	2170.56	0.155562	0.0839879	1.85219	0.063998	0.775716
MGP_BALBcJ_G0029987__Dtx1	20.0324	-1.40511	0.760315	-1.84806	0.064594	0.775716
MGP_BALBcJ_G0030015__Fam109a	404.184	0.253602	0.137135	1.84928	0.064417	0.775716
MGP_BALBcJ_G0030182__Prkrip1	302.861	0.242769	0.131566	1.84522	0.0650062	0.775716
MGP_BALBcJ_G0030205__Epo	1.3127	-3.36729	1.82117	-1.84898	0.0644611	0.775716
MGP_BALBcJ_G0031772__Apoc1	445.037	0.407777	0.220774	1.84704	0.0647419	0.775716
MGP_BALBcJ_G0032753__NA	39.2687	-0.814426	0.441017	-1.8467	0.064791	0.775716
MGP_BALBcJ_G0033049__Prss8	2005.85	0.314331	0.170244	1.84635	0.0648413	0.775716
MGP_BALBcJ_G0033837__Mri1	232.787	0.329655	0.178095	1.851	0.0641689	0.775716
MGP_BALBcJ_G0033894__Adcy7	678.849	-0.603952	0.327357	-1.84493	0.0650472	0.775716
MGP_BALBcJ_G0034268__Irf2bp2	1999.94	-0.255551	0.13838	-1.84674	0.0647852	0.775716
MGP_BALBcJ_G0036147__Hsd17b10	843.233	0.225785	0.122188	1.84784	0.0646248	0.775716
MGP_BALBcJ_G0006151__Gm30074	10.1781	1.22511	0.664264	1.84431	0.0651382	0.776343
MGP_BALBcJ_G0018347__Cops3	1187.01	0.146023	0.0791883	1.844	0.0651832	0.776345
MGP_BALBcJ_G0035600__Rpl39	2680.92	0.172529	0.0935871	1.84351	0.0652539	0.776345
MGP_BALBcJ_G0035898__Eda2r	316.186	-0.334233	0.181291	-1.84363	0.0652373	0.776345
MGP_BALBcJ_G0016509__Rgs13	1.43996	-4.64821	2.52204	-1.84304	0.0653234	0.776602
MGP_BALBcJ_G0028920__Rsrp1	9558.22	-0.168464	0.0914412	-1.84232	0.0654284	0.776602
MGP_BALBcJ_G0030308__Rbak	419.73	0.241825	0.131262	1.84231	0.0654297	0.776602
MGP_BALBcJ_G0032018__Cox6b1	3308.23	0.15856	0.0860447	1.84276	0.0653642	0.776602
MGP_BALBcJ_G0007403__C030014I23Rik	38.0267	-0.547161	0.297151	-1.84135	0.0655698	0.776662
MGP_BALBcJ_G0011842__NA	17.6056	0.946218	0.514098	1.84054	0.0656889	0.776662
MGP_BALBcJ_G0018079__Stk10	460.313	-0.467363	0.253838	-1.84119	0.0655941	0.776662
MGP_BALBcJ_G0021993__Apol10b	52.7455	-0.788641	0.428218	-1.84168	0.0655223	0.776662
MGP_BALBcJ_G0023123__Acat3	37.8716	0.683998	0.371562	1.84087	0.06564	0.776662
MGP_BALBcJ_G0027557__Ctss	3885.09	-0.575921	0.312927	-1.84043	0.0657045	0.776662
MGP_BALBcJ_G0028696__Kcnq4	67.8438	-0.533191	0.289596	-1.84116	0.0655986	0.776662
MGP_BALBcJ_G0000125__Igkv1-88	71.0213	-1.32131	0.719111	-1.83742	0.0661481	0.777406
MGP_BALBcJ_G0000618__NA	5.26345	-1.60993	0.877108	-1.8355	0.0664312	0.777406
MGP_BALBcJ_G0001632__NA	3.75776	2.87696	1.57515	1.82646	0.0677809	0.777406
MGP_BALBcJ_G0004253__Gm45051	11.0527	1.19325	0.652823	1.82783	0.0675748	0.777406
MGP_BALBcJ_G0004747__Gm27028	45.3913	0.594237	0.326023	1.82269	0.0683509	0.777406
MGP_BALBcJ_G0004931__F730311O21Rik	10.5833	-1.80379	0.991516	-1.81922	0.0688774	0.777406
MGP_BALBcJ_G0006729__Miat	5.17252	-1.65934	0.905037	-1.83345	0.0667364	0.777406
MGP_BALBcJ_G0010876__NA	3.20813	2.31367	1.27295	1.81756	0.0691313	0.777406
MGP_BALBcJ_G0015380__Ptpmt1	394.287	0.230481	0.126466	1.82247	0.0683835	0.777406
MGP_BALBcJ_G0015471__4930412C18Rik	15.632	1.06765	0.58064	1.83874	0.0659531	0.777406
MGP_BALBcJ_G0015684__Gm19569	3.01516	2.20888	1.20744	1.82939	0.0673415	0.777406
MGP_BALBcJ_G0015800__Crispld1	52.2906	-0.647071	0.353934	-1.82822	0.0675158	0.777406
MGP_BALBcJ_G0015899__Rfx8	1.42484	2.96955	1.63187	1.81972	0.0688011	0.777406
MGP_BALBcJ_G0015905__Il1rl1	95.2508	-0.59984	0.328417	-1.82646	0.0677814	0.777406
MGP_BALBcJ_G0015924__Tex30	93.1729	0.391442	0.21373	1.83148	0.0670292	0.777406
MGP_BALBcJ_G0016151__Irs1	2405.93	-0.342413	0.18693	-1.83177	0.0669864	0.777406
MGP_BALBcJ_G0016632__Tiprl	674.246	0.172784	0.0949451	1.81983	0.068785	0.777406
MGP_BALBcJ_G0016717__Copa	7697.6	-0.179858	0.0987497	-1.82135	0.068553	0.777406
MGP_BALBcJ_G0016820__Cnih4	833.582	0.187647	0.102154	1.83691	0.0662236	0.777406
MGP_BALBcJ_G0016846__36951	33.2813	1.23272	0.674674	1.82714	0.0676788	0.777406
MGP_BALBcJ_G0016852__Bpnt1	835.218	-0.170072	0.0926001	-1.83663	0.0662642	0.777406
MGP_BALBcJ_G0017297__Susd2	87.3976	-0.574816	0.316179	-1.81801	0.0690624	0.777406
MGP_BALBcJ_G0017332__Pofut2	1388.51	-0.195792	0.107445	-1.82225	0.0684173	0.777406
MGP_BALBcJ_G0017402__Misp	75.1021	0.562833	0.309602	1.81792	0.0690757	0.777406
MGP_BALBcJ_G0017546__Prdm4	1047.16	0.265745	0.14526	1.82944	0.0673332	0.777406
MGP_BALBcJ_G0018078__Efcab9	2.32856	-2.51104	1.3794	-1.82038	0.0687004	0.777406
MGP_BALBcJ_G0018144__Rack1	11519.9	0.11584	0.0637395	1.8174	0.0691558	0.777406
MGP_BALBcJ_G0018427__Myh1	5.40158	2.23909	1.22716	1.82461	0.06806	0.777406
MGP_BALBcJ_G0018466__Trappc1	738.79	0.182909	0.100583	1.81848	0.0689906	0.777406
MGP_BALBcJ_G0018991__Fbxl20	3570.68	0.372445	0.202812	1.83641	0.0662974	0.777406
MGP_BALBcJ_G0019230__Ace	9478.4	0.866717	0.474921	1.82497	0.0680056	0.777406
MGP_BALBcJ_G0019945__Gpr65	148.705	-0.627102	0.342717	-1.82979	0.0672808	0.777406
MGP_BALBcJ_G0020015__Serpina3m	16.6725	1.89934	1.04209	1.82262	0.0683613	0.777406
MGP_BALBcJ_G0020551__Dok3	188.836	-0.646967	0.355569	-1.81953	0.068831	0.777406
MGP_BALBcJ_G0020685__Nsun2	2122.54	0.200718	0.109728	1.82924	0.0673643	0.777406
MGP_BALBcJ_G0021151__Sftpd	5620.11	-0.331256	0.182063	-1.81946	0.0688413	0.777406
MGP_BALBcJ_G0021702__Mtmr12	1007.42	0.393831	0.215843	1.82462	0.0680587	0.777406
MGP_BALBcJ_G0022737__Dirc2	1049.46	0.225945	0.124187	1.81939	0.0688525	0.777406
MGP_BALBcJ_G0022833__Trat1	1.61443	-3.34917	1.83181	-1.82834	0.0674993	0.777406
MGP_BALBcJ_G0023038__Hlcs	240.451	0.293328	0.159965	1.8337	0.0666978	0.777406
MGP_BALBcJ_G0023059__Bace2	387.74	-0.666505	0.364804	-1.82702	0.0676969	0.777406
MGP_BALBcJ_G0023140__Psmb1	3163.18	0.153661	0.0844647	1.81923	0.0688764	0.777406
MGP_BALBcJ_G0023283__Rps2	6440.86	0.1258	0.0691713	1.81867	0.0689613	0.777406
MGP_BALBcJ_G0023507__Zbtb22	851.396	0.30173	0.165521	1.82291	0.0683175	0.777406
MGP_BALBcJ_G0023575__Clic1	6065.24	0.215627	0.117981	1.82764	0.0676035	0.777406
MGP_BALBcJ_G0023740__Slc25a27	271.472	0.462926	0.254397	1.8197	0.0688054	0.777406
MGP_BALBcJ_G0023809__Ccnd3	1780.43	0.480567	0.262048	1.83389	0.0666701	0.777406
MGP_BALBcJ_G0024337__Yipf5	1158.71	-0.176709	0.0963026	-1.83494	0.0665147	0.777406
MGP_BALBcJ_G0024441__Csf1r	2655.37	-0.488143	0.26779	-1.82286	0.068325	0.777406
MGP_BALBcJ_G0024726__Map4k2	912.186	-0.257843	0.141748	-1.81902	0.0689081	0.777406
MGP_BALBcJ_G0024853__Ms4a2	8.24847	1.37716	0.754867	1.82438	0.0680947	0.777406
MGP_BALBcJ_G0025104__Mms19	1384.22	0.259614	0.141495	1.83479	0.0665364	0.777406
MGP_BALBcJ_G0025558__Hmcn2	394.746	-0.76799	0.421331	-1.82277	0.0683384	0.777406
MGP_BALBcJ_G0026167__Pamr1	182.67	-0.542931	0.297397	-1.82561	0.0679084	0.777406
MGP_BALBcJ_G0026214__Bbox1	127.353	0.790388	0.430955	1.83404	0.0666484	0.777406
MGP_BALBcJ_G0026584__Cd93	1144.12	-0.396758	0.217826	-1.82144	0.0685395	0.777406
MGP_BALBcJ_G0026811__Stk4	1653.92	-0.224184	0.12196	-1.83817	0.0660371	0.777406
MGP_BALBcJ_G0026977__Slc17a9	91.6305	-0.613478	0.333794	-1.83789	0.0660783	0.777406
MGP_BALBcJ_G0027031__Pag1	276.52	-0.593321	0.325895	-1.82059	0.0686692	0.777406
MGP_BALBcJ_G0027407__NA	13.5414	1.12322	0.612338	1.83431	0.0666077	0.777406
MGP_BALBcJ_G0027439__Snapin	1038.61	0.18554	0.10129	1.83178	0.0669848	0.777406
MGP_BALBcJ_G0028064__Faxc	630.324	-0.242932	0.132428	-1.83445	0.066587	0.777406
MGP_BALBcJ_G0028240__Coro2a	1050.19	0.397904	0.218137	1.8241	0.0681373	0.777406
MGP_BALBcJ_G0028688__Hivep3	1550.38	0.257449	0.141085	1.82478	0.0680345	0.777406
MGP_BALBcJ_G0028826__Hcrtr1	2.80409	2.77561	1.51621	1.83062	0.0671569	0.777406
MGP_BALBcJ_G0028836__Sdc3	1468.19	-0.383073	0.20971	-1.82668	0.0677472	0.777406
MGP_BALBcJ_G0029007__Klhdc7a	9782.62	-0.212839	0.115718	-1.83929	0.0658728	0.777406
MGP_BALBcJ_G0029441__Fam193a	1234.76	0.136756	0.0749577	1.82444	0.068086	0.777406
MGP_BALBcJ_G0029445__Mfsd10	1319.78	0.180086	0.0980614	1.83646	0.0662895	0.777406
MGP_BALBcJ_G0029688__Mob1b	2421.13	-0.138028	0.0757234	-1.82279	0.0683346	0.777406
MGP_BALBcJ_G0030050__Diablo	970.396	0.127708	0.0701286	1.82106	0.0685981	0.777406
MGP_BALBcJ_G0030366__Polr1d	1511.6	0.123657	0.0676419	1.82811	0.0675334	0.777406
MGP_BALBcJ_G0031252__Gpr162	35.1909	-1.22189	0.666848	-1.83233	0.0669018	0.777406
MGP_BALBcJ_G0031443__Pyroxd1	628.595	0.163072	0.0895274	1.82147	0.0685352	0.777406
MGP_BALBcJ_G0031916__9530053A07Rik	2104.52	-0.540526	0.297117	-1.81924	0.0688753	0.777406
MGP_BALBcJ_G0032193__NA	88.5588	-0.602185	0.329681	-1.82657	0.0677651	0.777406
MGP_BALBcJ_G0032905__Acsm3	122.549	0.700891	0.381852	1.83551	0.0664305	0.777406
MGP_BALBcJ_G0033108__Dhx32	1804.37	0.253901	0.138921	1.82766	0.0676011	0.777406
MGP_BALBcJ_G0033849__Calr	30860.7	-0.255436	0.140553	-1.81736	0.0691619	0.777406
MGP_BALBcJ_G0034016__Slc9a5	117.431	0.383211	0.209316	1.83077	0.0671344	0.777406
MGP_BALBcJ_G0034495__Ets1	1299.27	-0.559101	0.305037	-1.83289	0.0668186	0.777406
MGP_BALBcJ_G0034697__Cd3d	9.72063	-2.09053	1.14029	-1.83333	0.0667534	0.777406
MGP_BALBcJ_G0035121__Pxylp1	283.781	0.33821	0.185504	1.8232	0.0682734	0.777406
MGP_BALBcJ_G0035137__Faim	319.643	0.290173	0.159428	1.82009	0.068746	0.777406
MGP_BALBcJ_G0035406__Cx3cr1	759.93	-0.623343	0.339415	-1.83652	0.0662802	0.777406
MGP_BALBcJ_G0035465__Ccr3	15.2814	-1.73122	0.942473	-1.83689	0.0662259	0.777406
MGP_BALBcJ_G0039483__Gm24339	1.72652	-2.98791	1.63619	-1.82613	0.0678306	0.777406
MGP_BALBcJ_G0039853__NA	14.0514	-0.921263	0.503692	-1.82902	0.0673963	0.777406
MGP_BALBcJ_G0015301__2010320O07Rik	1.33583	-3.59697	1.98037	-1.81631	0.0693221	0.777906
MGP_BALBcJ_G0019282__Abca8b	163.164	-0.464418	0.255654	-1.81659	0.0692806	0.777906
MGP_BALBcJ_G0034110__Glg1	5793.7	-0.132658	0.0730323	-1.81643	0.0693052	0.777906
MGP_BALBcJ_G0021718__Fam134b	3207.17	0.230097	0.126712	1.8159	0.0693852	0.77818
MGP_BALBcJ_G0019643__Arl4a	1070	0.402247	0.221573	1.81542	0.0694601	0.778342
MGP_BALBcJ_G0028711__Mfsd2a	270.804	0.905625	0.498883	1.81531	0.0694769	0.778342
MGP_BALBcJ_G0029269__Crot	234.165	-0.386019	0.212853	-1.81355	0.0697469	0.780499
MGP_BALBcJ_G0029411__Plb1	689.959	-0.578083	0.318756	-1.81356	0.0697454	0.780499
MGP_BALBcJ_G0028632__Rnf220	1052.93	0.212013	0.116965	1.81261	0.0698919	0.780821
MGP_BALBcJ_G0032131__Klk10	22.8581	1.36624	0.753659	1.81281	0.0698613	0.780821
MGP_BALBcJ_G0032963__Lat	31.126	-1.2187	0.672314	-1.8127	0.0698781	0.780821
MGP_BALBcJ_G0018780__Slfn1	71.2818	-1.12447	0.620703	-1.81161	0.0700469	0.782119
MGP_BALBcJ_G0026705__Dynlrb1	1196.35	0.136112	0.0751849	1.81037	0.0702391	0.783077
MGP_BALBcJ_G0028647__Szt2	1614.57	0.178816	0.0987725	1.81039	0.0702357	0.783077
MGP_BALBcJ_G0034448__Acp5	2051.96	-0.343913	0.189976	-1.8103	0.0702493	0.783077
MGP_BALBcJ_G0003501__Gm13381	12.2839	1.39189	0.769111	1.80974	0.0703363	0.783614
MGP_BALBcJ_G0028265__Rnf20	1990.4	-0.119664	0.0661317	-1.80948	0.0703759	0.783622
MGP_BALBcJ_G0000146__Igkv8-21	435.995	-1.98149	1.10209	-1.79794	0.0721868	0.784037
MGP_BALBcJ_G0000258__NA	2.21349	-4.22562	2.36336	-1.78797	0.0737807	0.784037
MGP_BALBcJ_G0002319__NA	4.56283	2.13261	1.20441	1.77067	0.076615	0.784037
MGP_BALBcJ_G0003036__Arhgap27os3	36.4521	-1.05952	0.587473	-1.80352	0.0713065	0.784037
MGP_BALBcJ_G0003048__NA	28.2966	0.678241	0.381665	1.77706	0.0755584	0.784037
MGP_BALBcJ_G0003187__2810402E24Rik	175.798	0.355158	0.199625	1.77913	0.0752189	0.784037
MGP_BALBcJ_G0003215__Zfhx2os	24.351	-0.795353	0.445344	-1.78593	0.0741104	0.784037
MGP_BALBcJ_G0003368__Gm16279	16.9045	-0.898523	0.508021	-1.76867	0.0769484	0.784037
MGP_BALBcJ_G0004126__Tbx3os1	22.0701	0.859534	0.476203	1.80497	0.0710787	0.784037
MGP_BALBcJ_G0004222__Gm10244	6.77982	1.51972	0.858091	1.77105	0.0765529	0.784037
MGP_BALBcJ_G0004236__Hoxaas3	1.62181	3.07119	1.7043	1.80203	0.0715409	0.784037
MGP_BALBcJ_G0004679__Rbm3os	11.8861	1.06896	0.594911	1.79684	0.0723614	0.784037
MGP_BALBcJ_G0005213__Gm12319	6.92237	-1.21848	0.685152	-1.77841	0.0753363	0.784037
MGP_BALBcJ_G0005307__9930038B18Rik	2.62708	-2.50568	1.41863	-1.76627	0.0773507	0.784037
MGP_BALBcJ_G0005418__5033403F01Rik	17.2604	-0.932567	0.520887	-1.79035	0.0733983	0.784037
MGP_BALBcJ_G0005662__A930024N18Rik	14.7312	0.863821	0.48895	1.76669	0.0772809	0.784037
MGP_BALBcJ_G0005783__AW112010	290.81	-0.727438	0.408514	-1.78069	0.0749625	0.784037
MGP_BALBcJ_G0005802__Gm27042	2.32328	-2.74943	1.52976	-1.7973	0.0722886	0.784037
MGP_BALBcJ_G0006104__Gm43672	146.083	0.560381	0.313127	1.78963	0.0735136	0.784037
MGP_BALBcJ_G0007273__3930402G23Rik	4.91107	2.07058	1.1607	1.7839	0.0744394	0.784037
MGP_BALBcJ_G0009313__Mir652	1.18056	-3.80159	2.10793	-1.80347	0.0713138	0.784037
MGP_BALBcJ_G0009975__NA	93.2724	0.42222	0.238419	1.77091	0.0765751	0.784037
MGP_BALBcJ_G0010457__NA	21.2442	-1.46084	0.822967	-1.77509	0.0758836	0.784037
MGP_BALBcJ_G0010837__NA	3.7941	2.05858	1.14244	1.80192	0.0715587	0.784037
MGP_BALBcJ_G0011478__NA	38.0203	-0.640075	0.353887	-1.8087	0.0704979	0.784037
MGP_BALBcJ_G0013807__NA	157.826	0.315459	0.177331	1.77893	0.0752518	0.784037
MGP_BALBcJ_G0014000__NA	4.92598	1.45667	0.808499	1.8017	0.0715927	0.784037
MGP_BALBcJ_G0014741__NA	4.05481	-2.48085	1.37961	-1.79823	0.072141	0.784037
MGP_BALBcJ_G0015041__C130036L24Rik	18.9785	-0.778859	0.436232	-1.78542	0.0741926	0.784037
MGP_BALBcJ_G0015117__NA	29.4498	-0.706924	0.392334	-1.80184	0.0715703	0.784037
MGP_BALBcJ_G0015199__NA	15.1074	0.957307	0.539773	1.77354	0.0761398	0.784037
MGP_BALBcJ_G0015526__Gm16023	62.0189	-0.40092	0.225646	-1.77676	0.075607	0.784037
MGP_BALBcJ_G0016023__Ndufs1	1930.83	0.128787	0.0724906	1.7766	0.0756349	0.784037
MGP_BALBcJ_G0016069__Xrcc5	498.201	0.266507	0.150929	1.76577	0.0774337	0.784037
MGP_BALBcJ_G0016111__Zfand2b	539.13	0.304987	0.172546	1.76757	0.0771327	0.784037
MGP_BALBcJ_G0016424__Plekha6	3035.04	-0.180176	0.10105	-1.78303	0.0745816	0.784037
MGP_BALBcJ_G0016436__Atp2b4	611.374	-0.303369	0.168517	-1.80024	0.0718234	0.784037
MGP_BALBcJ_G0016466__Shisa4	179.454	-0.413377	0.233534	-1.77009	0.0767115	0.784037
MGP_BALBcJ_G0016680__Fcgr4	179.807	-0.671129	0.37341	-1.7973	0.0722885	0.784037
MGP_BALBcJ_G0016935__Ginm1	1604.12	0.135128	0.0758801	1.78081	0.0749427	0.784037
MGP_BALBcJ_G0017162__Nepn	32.0419	-0.830889	0.466415	-1.78144	0.0748413	0.784037
MGP_BALBcJ_G0017292__Upb1	50.3842	0.814947	0.459614	1.77311	0.0762102	0.784037
MGP_BALBcJ_G0017400__Prss57	1.83299	-3.39883	1.91545	-1.77443	0.0759922	0.784037
MGP_BALBcJ_G0017683__Ptprb	2169.4	-0.216463	0.121435	-1.78254	0.0746607	0.784037
MGP_BALBcJ_G0017750__Dtx3	2008.7	-0.267435	0.149757	-1.7858	0.0741323	0.784037
MGP_BALBcJ_G0017915__Sec14l2	1007.99	0.235149	0.133152	1.76603	0.0773916	0.784037
MGP_BALBcJ_G0018151__NA	68.8148	-0.825839	0.456587	-1.80872	0.070494	0.784037
MGP_BALBcJ_G0018247__Slc22a5	577.735	-0.23051	0.130346	-1.76844	0.0769867	0.784037
MGP_BALBcJ_G0018402__Zfp286	15.1561	-0.877008	0.49597	-1.76827	0.0770164	0.784037
MGP_BALBcJ_G0018423__Adprm	392.358	0.229249	0.128847	1.77924	0.0752004	0.784037
MGP_BALBcJ_G0018470__NA	493.299	-0.17907	0.0997119	-1.79588	0.0725143	0.784037
MGP_BALBcJ_G0018788__1700020L24Rik	16.7329	1.0638	0.589115	1.80576	0.0709561	0.784037
MGP_BALBcJ_G0018853__Lpo	255.18	1.24985	0.702854	1.77825	0.0753626	0.784037
MGP_BALBcJ_G0018876__Pctp	269.895	0.295386	0.165736	1.78227	0.074706	0.784037
MGP_BALBcJ_G0018949__Hoxb2	57.76	-0.56762	0.316808	-1.79168	0.0731835	0.784037
MGP_BALBcJ_G0018976__Mllt6	2603.45	0.254778	0.143143	1.77989	0.0750943	0.784037
MGP_BALBcJ_G0019079__NA	0.961961	4.14848	2.34441	1.76952	0.0768075	0.784037
MGP_BALBcJ_G0019115__Stat3	15333.1	0.165014	0.0930473	1.77345	0.0761547	0.784037
MGP_BALBcJ_G0019220__Itgb3	272.175	-0.467425	0.262913	-1.77787	0.0754247	0.784037
MGP_BALBcJ_G0019284__Abca9	680.55	-0.580865	0.327904	-1.77145	0.0764859	0.784037
MGP_BALBcJ_G0019307__Cd300c	26.2833	-1.18169	0.658554	-1.79437	0.0727542	0.784037
MGP_BALBcJ_G0019429__Chmp6	773.612	0.223394	0.124884	1.78881	0.0736452	0.784037
MGP_BALBcJ_G0019468__Dcxr	2258.56	0.499882	0.280516	1.78201	0.074748	0.784037
MGP_BALBcJ_G0019551__Trib2	843.299	-0.368195	0.208087	-1.76943	0.0768222	0.784037
MGP_BALBcJ_G0019935__Adck1	428.496	-0.204688	0.113224	-1.80782	0.0706351	0.784037
MGP_BALBcJ_G0019980__Tmem251	269.36	0.296539	0.165819	1.78833	0.0737221	0.784037
MGP_BALBcJ_G0020030__D430019H16Rik	4.97312	-2.10749	1.17743	-1.78991	0.0734684	0.784037
MGP_BALBcJ_G0020096__Siva1	124.978	0.382073	0.214772	1.77897	0.0752441	0.784037
MGP_BALBcJ_G0020124__Cdca7l	201.84	0.456878	0.253523	1.80212	0.071527	0.784037
MGP_BALBcJ_G0020208__Aoah	33.552	-0.844304	0.478218	-1.76552	0.0774763	0.784037
MGP_BALBcJ_G0020344__Prl6a1	1.51608	3.09781	1.72636	1.79442	0.072746	0.784037
MGP_BALBcJ_G0020507__Syk	898.821	-0.896017	0.506863	-1.76777	0.0770994	0.784037
MGP_BALBcJ_G0020620__2010111I01Rik	1086.7	0.206042	0.115997	1.77626	0.0756897	0.784037
MGP_BALBcJ_G0020735__Pou5f2	1.48546	3.19181	1.76843	1.80488	0.0710929	0.784037
MGP_BALBcJ_G0020747__Cox7c	2194.19	0.150392	0.0849364	1.77064	0.0766204	0.784037
MGP_BALBcJ_G0020921__4833420G17Rik	1519.42	0.29187	0.165326	1.76542	0.0774934	0.784037
MGP_BALBcJ_G0021095__Ogdhl	20.1625	1.04379	0.586509	1.77966	0.0751314	0.784037
MGP_BALBcJ_G0021222__Pnp	1597.59	0.217202	0.121738	1.78418	0.0743944	0.784037
MGP_BALBcJ_G0021464__Gm5464	1.64004	-3.57018	2.00469	-1.78092	0.0749261	0.784037
MGP_BALBcJ_G0021507__Reep4	711.404	0.244979	0.13638	1.7963	0.0724472	0.784037
MGP_BALBcJ_G0021521__Lpar6	702.912	-0.293265	0.163444	-1.79428	0.072768	0.784037
MGP_BALBcJ_G0021803__Trps1	7801.21	-0.357106	0.201375	-1.77334	0.0761727	0.784037
MGP_BALBcJ_G0021890__Ptp4a3	363.34	-0.371538	0.207158	-1.7935	0.0728926	0.784037
MGP_BALBcJ_G0021925__Mafa	2.39196	-2.66426	1.50445	-1.77093	0.0765731	0.784037
MGP_BALBcJ_G0021983__Rpl8	7629.76	0.119334	0.0664966	1.79459	0.0727189	0.784037
MGP_BALBcJ_G0022068__Grap2	72.7689	-1.0135	0.57389	-1.76602	0.0773926	0.784037
MGP_BALBcJ_G0022149__Nup50	1377.95	0.187461	0.104265	1.79793	0.0721878	0.784037
MGP_BALBcJ_G0022287__Dnajc22	6.71076	1.46556	0.812858	1.80297	0.0713923	0.784037
MGP_BALBcJ_G0022815__Atg3	1216.46	-0.162777	0.0910694	-1.78739	0.0738739	0.784037
MGP_BALBcJ_G0022825__Phldb2	296.687	-0.318063	0.18013	-1.76574	0.0774396	0.784037
MGP_BALBcJ_G0023032__Cbr3	106.419	0.368969	0.204067	1.80807	0.070595	0.784037
MGP_BALBcJ_G0023224__Mmp25	157.748	0.712238	0.400148	1.77994	0.0750865	0.784037
MGP_BALBcJ_G0023225__Ccdc64b	978.985	0.398703	0.224496	1.77599	0.075734	0.784037
MGP_BALBcJ_G0023256__Atp6v0c	2478.93	-0.243429	0.134932	-1.80408	0.0712183	0.784037
MGP_BALBcJ_G0023731__Adgrf2	2.91214	2.25908	1.26395	1.78732	0.0738855	0.784037
MGP_BALBcJ_G0023743__Enpp5	4553.37	-0.218195	0.122079	-1.78732	0.0738861	0.784037
MGP_BALBcJ_G0023816__NA	4.35076	-1.50086	0.848703	-1.76841	0.0769922	0.784037
MGP_BALBcJ_G0024050__Srbd1	468.759	-0.215265	0.120659	-1.78408	0.0744099	0.784037
MGP_BALBcJ_G0024130__Psma8	5.27749	-1.74432	0.976763	-1.78581	0.0741294	0.784037
MGP_BALBcJ_G0024435__Cd74	14742.7	-0.81588	0.453161	-1.80042	0.0717945	0.784037
MGP_BALBcJ_G0024503__Mc2r	53.5865	0.604678	0.337952	1.78924	0.0735758	0.784037
MGP_BALBcJ_G0024753__Cox8a	2797.69	0.141774	0.0792104	1.78985	0.0734785	0.784037
MGP_BALBcJ_G0024934__Gnaq	2588.2	-0.137402	0.0776924	-1.76854	0.0769709	0.784037
MGP_BALBcJ_G0025271__Zfp950	975.764	-0.263361	0.148746	-1.77054	0.0766371	0.784037
MGP_BALBcJ_G0025347__Dnajc1	1631.29	-0.155134	0.0876029	-1.77088	0.0765801	0.784037
MGP_BALBcJ_G0025590__Eng	1523.91	-0.343468	0.193008	-1.77955	0.0751495	0.784037
MGP_BALBcJ_G0025754__Ttc21b	376.327	-0.281346	0.157665	-1.78445	0.0743498	0.784037
MGP_BALBcJ_G0026102__Agbl2	6.70238	-1.42545	0.80656	-1.76732	0.0771745	0.784037
MGP_BALBcJ_G0026279__BC052040	127.119	-0.336046	0.187127	-1.79581	0.072524	0.784037
MGP_BALBcJ_G0026376__NA	264.615	0.385122	0.216165	1.78161	0.0748134	0.784037
MGP_BALBcJ_G0026414__Atp8b4	81.649	-0.963122	0.538096	-1.78987	0.0734747	0.784037
MGP_BALBcJ_G0026488__Lzts3	145.698	-0.342913	0.192078	-1.78528	0.0742156	0.784037
MGP_BALBcJ_G0026624__Slc52a3	76.7295	0.764411	0.423938	1.80312	0.0713699	0.784037
MGP_BALBcJ_G0026801__NA	572.003	-0.284145	0.15883	-1.78899	0.0736167	0.784037
MGP_BALBcJ_G0026963__Adrm1	2270.85	0.212647	0.119231	1.78349	0.0745059	0.784037
MGP_BALBcJ_G0027239__Vmn2r1	2.17574	3.29628	1.84043	1.79104	0.0732866	0.784037
MGP_BALBcJ_G0027349__Crabp2	333.123	0.579638	0.321671	1.80196	0.0715514	0.784037
MGP_BALBcJ_G0027363__Tmem79	673.318	0.290005	0.161934	1.79088	0.0733118	0.784037
MGP_BALBcJ_G0027532__Psmb4	2504.01	0.188037	0.106216	1.77032	0.0766733	0.784037
MGP_BALBcJ_G0027644__Cd101	23.3027	-1.93585	1.08329	-1.78701	0.0739366	0.784037
MGP_BALBcJ_G0027667__Olfml3	804.207	-0.587426	0.328484	-1.78829	0.0737286	0.784037
MGP_BALBcJ_G0028130__Kif24	50.194	0.697774	0.395037	1.76635	0.0773366	0.784037
MGP_BALBcJ_G0028134__Fam219a	476.655	0.244252	0.136616	1.78788	0.0737958	0.784037
MGP_BALBcJ_G0028317__Hsdl2	4873.28	-0.270149	0.151142	-1.78738	0.0738756	0.784037
MGP_BALBcJ_G0028572__Foxd2	4.22149	-1.85414	1.03017	-1.79984	0.0718855	0.784037
MGP_BALBcJ_G0028921__Syf2	1037.91	0.215566	0.120253	1.7926	0.073037	0.784037
MGP_BALBcJ_G0029121__Nmnat1	228.286	-0.257907	0.144029	-1.79066	0.0733473	0.784037
MGP_BALBcJ_G0029241__Pex1	1202.24	-0.301788	0.170936	-1.7655	0.0774803	0.784037
MGP_BALBcJ_G0029384__Cad	827.865	-0.414544	0.234633	-1.76678	0.0772653	0.784037
MGP_BALBcJ_G0029716__Gm1045	13.8575	1.20989	0.672531	1.79901	0.0720169	0.784037
MGP_BALBcJ_G0029823__Rpl5	10015.6	0.107564	0.0600079	1.79251	0.0730521	0.784037
MGP_BALBcJ_G0030156__Fzd9	3.29831	2.12305	1.17787	1.80245	0.0714742	0.784037
MGP_BALBcJ_G0030631__Zyx	3536.01	0.353233	0.198483	1.77966	0.0751315	0.784037
MGP_BALBcJ_G0030683__Zfp775	43.7251	-0.495575	0.275584	-1.79827	0.0721345	0.784037
MGP_BALBcJ_G0030951__Fam136a	552.985	-0.25407	0.143119	-1.77524	0.0758586	0.784037
MGP_BALBcJ_G0031065__Rybp	1340.44	-0.277834	0.156493	-1.77538	0.075836	0.784037
MGP_BALBcJ_G0031078__Setmar	105.112	0.432628	0.23998	1.80277	0.0714249	0.784037
MGP_BALBcJ_G0031094__Mtmr14	563.817	0.240259	0.134965	1.78016	0.07505	0.784037
MGP_BALBcJ_G0031558__Zfp865	178.979	0.379813	0.211849	1.79284	0.0729978	0.784037
MGP_BALBcJ_G0031938__Acp7	6.53406	1.82064	1.01247	1.79822	0.0721429	0.784037
MGP_BALBcJ_G0032081__Pdcd5	526.026	0.217768	0.121648	1.79015	0.0734306	0.784037
MGP_BALBcJ_G0032083__Zfp507	830.67	-0.147597	0.0825856	-1.7872	0.0739049	0.784037
MGP_BALBcJ_G0032097__NA	9.40855	-1.28496	0.720481	-1.78347	0.0745099	0.784037
MGP_BALBcJ_G0032100__Zfp788	263.221	-0.236953	0.132327	-1.79067	0.0733468	0.784037
MGP_BALBcJ_G0032161__Napsa	92.8845	-0.983711	0.554465	-1.77416	0.0760363	0.784037
MGP_BALBcJ_G0032450__Zfand6	1571.79	0.16552	0.0922257	1.79473	0.0726964	0.784037
MGP_BALBcJ_G0032519__Capn5	1072.31	0.313229	0.174746	1.79248	0.0730564	0.784037
MGP_BALBcJ_G0032835__Tmem9b	965.713	0.223933	0.125951	1.77793	0.0754147	0.784037
MGP_BALBcJ_G0033006__Kif22	54.798	0.813799	0.45661	1.78226	0.0747068	0.784037
MGP_BALBcJ_G0033147__Echs1	1479.28	0.176214	0.0991422	1.77738	0.0755051	0.784037
MGP_BALBcJ_G0033148__Paox	269.263	0.29258	0.16195	1.80661	0.0708232	0.784037
MGP_BALBcJ_G0033219__Chid1	1120.48	-0.400292	0.222994	-1.79508	0.0726411	0.784037
MGP_BALBcJ_G0033527__Micu3	39.7937	0.507884	0.283086	1.7941	0.0727977	0.784037
MGP_BALBcJ_G0033549__Fat1	10931.2	-0.207715	0.116407	-1.78439	0.0743604	0.784037
MGP_BALBcJ_G0033571__Irf2	957.683	-0.206994	0.114898	-1.80155	0.0716164	0.784037
MGP_BALBcJ_G0033614__Palld	1246.85	-0.402484	0.224184	-1.79533	0.0726014	0.784037
MGP_BALBcJ_G0033741__B3gnt3	221.241	0.419241	0.235507	1.78016	0.0750496	0.784037
MGP_BALBcJ_G0034019__Lrrc36	25.5973	-0.605004	0.335997	-1.80062	0.0717627	0.784037
MGP_BALBcJ_G0034062__NA	679.655	-0.218242	0.121614	-1.79456	0.0727245	0.784037
MGP_BALBcJ_G0034191__Slc7a5	3117.57	0.518216	0.287772	1.80079	0.0717366	0.784037
MGP_BALBcJ_G0034237__Acta1	8.12853	1.28776	0.722709	1.78185	0.0747738	0.784037
MGP_BALBcJ_G0034476__Jam3	68.7288	-0.707915	0.393735	-1.79795	0.0721854	0.784037
MGP_BALBcJ_G0034747__Ncam1	24.206	-1.08509	0.603706	-1.79739	0.0722742	0.784037
MGP_BALBcJ_G0034759__Dixdc1	1192.56	0.520154	0.292635	1.77749	0.0754881	0.784037
MGP_BALBcJ_G0034865__Cd276	461.686	0.247298	0.137859	1.79385	0.0728369	0.784037
MGP_BALBcJ_G0034968__Gtf2a2	888.017	0.178225	0.100141	1.77975	0.0751176	0.784037
MGP_BALBcJ_G0035065__Pgm3	610.074	-0.285586	0.159189	-1.794	0.0728124	0.784037
MGP_BALBcJ_G0035222__Cish	1428.49	-0.256521	0.144805	-1.77149	0.0764797	0.784037
MGP_BALBcJ_G0035228__Nprl2	398.078	-0.234902	0.132394	-1.77427	0.0760187	0.784037
MGP_BALBcJ_G0035367__Cnot10	870.158	0.160729	0.0893322	1.79922	0.0719836	0.784037
MGP_BALBcJ_G0035387__Dlec1	26.3462	-0.724654	0.408319	-1.77472	0.0759435	0.784037
MGP_BALBcJ_G0035437__Abhd5	9670.69	0.400069	0.22235	1.79927	0.0719753	0.784037
MGP_BALBcJ_G0035491__NA	1571.76	0.267604	0.15077	1.77491	0.0759121	0.784037
MGP_BALBcJ_G0035513__Was	161.903	-0.692798	0.386825	-1.79099	0.0732955	0.784037
MGP_BALBcJ_G0036165__Kctd12b	365.167	-0.356536	0.201522	-1.76922	0.0768575	0.784037
MGP_BALBcJ_G0036197__Cdkl5	422.973	-0.203335	0.114985	-1.76836	0.0770012	0.784037
MGP_BALBcJ_G0036234__Tlr8	175.478	-0.685701	0.387366	-1.77016	0.0766999	0.784037
MGP_BALBcJ_G0037753__Gm25184	7.28571	1.52052	0.860032	1.76798	0.0770638	0.784037
MGP_BALBcJ_G0039349__Snord88c	4.25869	-2.25817	1.2565	-1.7972	0.0723046	0.784037
MGP_BALBcJ_G0039509__Gm23136	8.46395	-1.31142	0.735138	-1.78391	0.0744388	0.784037
MGP_BALBcJ_G0039703__NA	105	-0.382683	0.212497	-1.80088	0.0717215	0.784037
MGP_BALBcJ_G0040084__NA	8.55528	1.38053	0.778811	1.77261	0.0762933	0.784037
MGP_BALBcJ_G0016709__Cd48	147.412	-0.758338	0.430086	-1.76323	0.0778625	0.78429
MGP_BALBcJ_G0019746__Pygl	771.536	0.652065	0.369515	1.76465	0.0776224	0.78429
MGP_BALBcJ_G0021233__Rnase1	5225.25	-0.535954	0.303819	-1.76406	0.0777223	0.78429
MGP_BALBcJ_G0022033__Polr2f	451.008	0.269758	0.152948	1.76372	0.0777793	0.78429
MGP_BALBcJ_G0023410__Slc26a8	35.1078	0.697249	0.395113	1.76468	0.0776169	0.78429
MGP_BALBcJ_G0023875__Lrg1	8294.8	0.25243	0.143081	1.76424	0.0776922	0.78429
MGP_BALBcJ_G0024473__Alpk2	4.72834	1.8049	1.02379	1.76296	0.0779076	0.78429
[truncated: 18,155 more rows]
