# Supplementary material for: Estrogen exacerbates mammary involution through neutrophil-dependent and -independent mechanism
Source: eLife journal article supplement (doi:10.7554/elife.57274), 2020-07-24
Supplement: supp [file elife-57274-supp-v1.zip › elife_poa_e57274_Figure_2_source_data_2.xlsx]

## Sheet: groupC_Vs_groupA
	baseMean	log2FoldChange	lfcSE	stat	pvalue	padj
MGP_BALBcJ_G0016424__Plekha6	3035.04	-1.24705	0.102038	-12.2214	2.38854e-34	3.78559e-30
MGP_BALBcJ_G0033692__Isyna1	2137.79	1.79616	0.165666	10.842	2.17612e-27	1.72447e-23
MGP_BALBcJ_G0018261__Gpx3	15857.6	2.84412	0.265721	10.7034	9.80981e-27	5.18252e-23
MGP_BALBcJ_G0033474__Zfp703	1149.5	1.28721	0.124794	10.3146	6.0526e-25	2.39819e-21
MGP_BALBcJ_G0032956__Il4ra	4811.5	1.904	0.196255	9.70169	2.96544e-22	9.39986e-19
MGP_BALBcJ_G0024427__Smim3	566.698	1.04749	0.117255	8.93343	4.13019e-19	1.09099e-15
MGP_BALBcJ_G0029707__Cxcl1	433.626	2.57434	0.29395	8.75777	1.99159e-18	4.50924e-15
MGP_BALBcJ_G0026764__Tgm2	10162.1	2.07274	0.239932	8.63886	5.67759e-18	1.1248e-14
MGP_BALBcJ_G0019554__Greb1	85.4683	4.42223	0.513058	8.61936	6.73303e-18	1.18569e-14
MGP_BALBcJ_G0025220__Rbm20	356.414	3.44765	0.40952	8.41875	3.80539e-17	6.03115e-14
MGP_BALBcJ_G0025620__Traf1	463.074	-1.21007	0.146938	-8.23524	1.79201e-16	2.58196e-13
MGP_BALBcJ_G0021520__Rb1	7826.57	-0.768948	0.0950128	-8.0931	5.81647e-16	7.6821e-13
MGP_BALBcJ_G0032066__Chst8	68.5847	3.76523	0.470251	8.00684	1.1769e-15	1.43482e-12
MGP_BALBcJ_G0025323__Itga8	9665.08	-1.09825	0.139477	-7.87409	3.43228e-15	3.88559e-12
MGP_BALBcJ_G0017610__Gm9847	574.767	1.80582	0.230376	7.83859	4.55618e-15	4.81406e-12
MGP_BALBcJ_G0020056__NA	43.3221	4.39892	0.565752	7.77535	7.52404e-15	7.45303e-12
MGP_BALBcJ_G0017921__Osm	120.762	4.89412	0.634559	7.71263	1.23252e-14	1.14156e-11
MGP_BALBcJ_G0028091__Pnrc1	2063.34	0.603404	0.0783014	7.70617	1.2965e-14	1.14156e-11
MGP_BALBcJ_G0026895__Ptpn1	2736.87	0.594794	0.0772655	7.69805	1.38157e-14	1.15245e-11
MGP_BALBcJ_G0017549__Bpifc	34.8446	4.56782	0.595344	7.67258	1.68571e-14	1.33584e-11
MGP_BALBcJ_G0025031__Ch25h	77.321	4.36386	0.574345	7.59797	3.0081e-14	2.27025e-11
MGP_BALBcJ_G0030300__Mmd2	90.9984	3.4782	0.45833	7.58884	3.2278e-14	2.32534e-11
MGP_BALBcJ_G0032866__Spon1	1180	1.63047	0.215812	7.55508	4.18602e-14	2.88453e-11
MGP_BALBcJ_G0015902__Il1r2	153.209	4.49194	0.607006	7.40015	1.36031e-13	8.98315e-11
MGP_BALBcJ_G0016385__Pigr	54662.3	1.07869	0.147701	7.30319	2.81018e-13	1.71302e-10
MGP_BALBcJ_G0022817__Cd200	871.901	1.73286	0.237184	7.30598	2.7526e-13	1.71302e-10
MGP_BALBcJ_G0019854__Papln	2146.48	1.54232	0.214657	7.18505	6.71807e-13	3.94351e-10
MGP_BALBcJ_G0019283__Abca8a	623.297	-1.94157	0.270609	-7.17484	7.23932e-13	4.09771e-10
MGP_BALBcJ_G0021354__Atp12a	227.952	-2.35172	0.330774	-7.10977	1.16239e-12	6.35266e-10
MGP_BALBcJ_G0022943__Adamts1	1153.24	1.89588	0.270429	7.01065	2.37215e-12	1.25321e-09
MGP_BALBcJ_G0035581__Klhl13	743.702	-0.803517	0.115119	-6.97988	2.95435e-12	1.51044e-09
MGP_BALBcJ_G0029338__Kmt2c	3156.26	-0.529801	0.0768394	-6.89491	5.38996e-12	2.66955e-09
MGP_BALBcJ_G0027452__S100a8	660.188	4.96894	0.722174	6.88054	5.96274e-12	2.86374e-09
MGP_BALBcJ_G0019109__Rab5c	3788.79	0.494995	0.0724727	6.83009	8.4859e-12	3.84266e-09
MGP_BALBcJ_G0032272__Ptpn5	45.347	4.3734	0.640009	6.83334	8.29623e-12	3.84266e-09
MGP_BALBcJ_G0032551__P4ha3	110.92	2.62083	0.384127	6.82283	8.92625e-12	3.92978e-09
MGP_BALBcJ_G0019475__Slc16a3	368.449	5.88363	0.86565	6.79678	1.06983e-11	4.58265e-09
MGP_BALBcJ_G0028974__Sh2d5	66.4095	3.33398	0.49171	6.78038	1.19857e-11	4.98918e-09
MGP_BALBcJ_G0033054__NA	243.821	2.35933	0.348142	6.77691	1.2277e-11	4.98918e-09
MGP_BALBcJ_G0020020__Clmn	5332.91	-0.665703	0.099233	-6.70849	1.96648e-11	7.7917e-09
MGP_BALBcJ_G0015974__Plcl1	307.375	-1.12563	0.168095	-6.6964	2.13615e-11	8.25751e-09
MGP_BALBcJ_G0026416__Hdc	759.059	4.53182	0.678862	6.67561	2.46205e-11	9.29073e-09
MGP_BALBcJ_G0031457__Bcat1	86.7264	2.46762	0.370103	6.66738	2.6041e-11	9.59824e-09
MGP_BALBcJ_G0018341__Nlrp3	188.784	3.57046	0.535813	6.66362	2.67161e-11	9.62325e-09
MGP_BALBcJ_G0021876__Ndrg1	36301.4	-0.859059	0.129891	-6.6137	3.74834e-11	1.31014e-08
MGP_BALBcJ_G0032550__Pgm2l1	731.494	-0.854389	0.129226	-6.61157	3.80253e-11	1.31014e-08
MGP_BALBcJ_G0034319__Sesn3	1284.45	-1.16769	0.177975	-6.561	5.34473e-11	1.80231e-08
MGP_BALBcJ_G0003474__E030013I19Rik	1438.6	-1.9711	0.30064	-6.55635	5.51403e-11	1.82066e-08
MGP_BALBcJ_G0031164__Ret	514.957	1.97686	0.303372	6.51628	7.207e-11	2.3311e-08
MGP_BALBcJ_G0027993__NA	1394	0.584975	0.0901122	6.49163	8.49104e-11	2.61505e-08
MGP_BALBcJ_G0033816__Adgre5	1200.29	0.935001	0.144064	6.49017	8.57388e-11	2.61505e-08
MGP_BALBcJ_G0035569__Timp1	1190.59	2.55284	0.393346	6.49007	8.57989e-11	2.61505e-08
MGP_BALBcJ_G0022725__Muc13	69.2194	2.33288	0.359981	6.48055	9.1386e-11	2.73278e-08
MGP_BALBcJ_G0039793__NA	853.712	-0.868716	0.134824	-6.44335	1.16867e-10	3.43005e-08
MGP_BALBcJ_G0020566__Cxcl14	6160.77	0.681008	0.105843	6.43411	1.24198e-10	3.57892e-08
MGP_BALBcJ_G0030799__Fam13a	1986.46	-1.41647	0.220252	-6.43116	1.26637e-10	3.58405e-08
MGP_BALBcJ_G0031682__C5ar2	181.877	2.40865	0.374711	6.42803	1.29267e-10	3.59429e-08
MGP_BALBcJ_G0023421__Rab44	88.8811	4.59372	0.715721	6.4183	1.378e-10	3.76551e-08
MGP_BALBcJ_G0027370__Sema4a	713.07	0.97483	0.152232	6.40357	1.51789e-10	4.0095e-08
MGP_BALBcJ_G0034308__Pgr	132.543	2.5374	0.396238	6.40373	1.51629e-10	4.0095e-08
MGP_BALBcJ_G0034046__Dpep2	88.9753	2.07452	0.32524	6.37842	1.78924e-10	4.64879e-08
MGP_BALBcJ_G0016016__Raph1	3259.11	-1.00973	0.158461	-6.37211	1.86442e-10	4.69035e-08
MGP_BALBcJ_G0016917__Esr1	1071.57	-1.08982	0.170975	-6.37412	1.84019e-10	4.69035e-08
MGP_BALBcJ_G0027727__Csf1	1820.07	1.96274	0.309848	6.33453	2.38073e-10	5.89565e-08
MGP_BALBcJ_G0016515__NA	90.1253	4.26021	0.675454	6.30718	2.8417e-10	6.92895e-08
MGP_BALBcJ_G0035404__Csrnp1	361.237	2.02122	0.321488	6.2871	3.23456e-10	7.76734e-08
MGP_BALBcJ_G0021151__Sftpd	5620.11	-1.14556	0.18229	-6.28426	3.29416e-10	7.79241e-08
MGP_BALBcJ_G0023133__Thbs2	1164.64	1.0518	0.167678	6.27276	3.54699e-10	8.26709e-08
MGP_BALBcJ_G0019402__Socs3	2408.27	1.78999	0.286438	6.24915	4.12683e-10	9.40002e-08
MGP_BALBcJ_G0029708__Cxcl2	452.302	6.25164	1.00055	6.24822	4.15169e-10	9.40002e-08
MGP_BALBcJ_G0024063__Calm2	4191.79	0.455485	0.0737395	6.17694	6.53551e-10	1.45889e-07
MGP_BALBcJ_G0033350__F10	73.9585	4.75021	0.769377	6.1741	6.65393e-10	1.4647e-07
MGP_BALBcJ_G0026464__Il1b	892.352	4.41393	0.716723	6.15849	7.34435e-10	1.59453e-07
MGP_BALBcJ_G0027702__Chil3	64.0763	4.883	0.795512	6.13818	8.34712e-10	1.78775e-07
MGP_BALBcJ_G0020875__Elovl7	797.042	-0.666816	0.108807	-6.12844	8.87475e-10	1.87541e-07
MGP_BALBcJ_G0032699__NA	105.459	3.74011	0.610795	6.12335	9.16294e-10	1.91083e-07
MGP_BALBcJ_G0029007__Klhdc7a	9782.62	-0.706935	0.115822	-6.10363	1.03689e-09	2.13424e-07
MGP_BALBcJ_G0023365__Dusp1	681.588	2.36083	0.386993	6.10044	1.05778e-09	2.14932e-07
MGP_BALBcJ_G0018904__Lrrc59	5374.05	0.574073	0.094422	6.07987	1.20281e-09	2.41309e-07
MGP_BALBcJ_G0004701__F630028O10Rik	97.4282	2.8066	0.462041	6.07436	1.24486e-09	2.46623e-07
MGP_BALBcJ_G0009495__Mirt2	43.2326	8.06793	1.33108	6.06121	1.35103e-09	2.61352e-07
MGP_BALBcJ_G0020430__Gcnt2	827.463	1.84299	0.30407	6.06107	1.35219e-09	2.61352e-07
MGP_BALBcJ_G0029895__Cmklr1	591.333	0.882584	0.145843	6.05158	1.43429e-09	2.7388e-07
MGP_BALBcJ_G0034296__Mmp8	55.3807	4.16283	0.688906	6.04267	1.51582e-09	2.86002e-07
MGP_BALBcJ_G0027453__S100a9	1248.93	6.25677	1.03661	6.03579	1.58186e-09	2.94952e-07
MGP_BALBcJ_G0034965__Anxa2	3661.78	1.64926	0.273401	6.03237	1.61569e-09	2.97757e-07
MGP_BALBcJ_G0026891__Snai1	102.2	2.14528	0.356364	6.0199	1.74524e-09	3.17935e-07
MGP_BALBcJ_G0025550__Ptges	3008.45	0.75291	0.125331	6.00739	1.88529e-09	3.39545e-07
MGP_BALBcJ_G0022836__Retnlg	79.7889	4.30465	0.718118	5.99435	2.04295e-09	3.63469e-07
MGP_BALBcJ_G0027245__Tiparp	877.332	1.1466	0.191333	5.99269	2.06399e-09	3.63469e-07
MGP_BALBcJ_G0026759__Nnat	126.268	2.20495	0.368305	5.98674	2.14092e-09	3.72873e-07
MGP_BALBcJ_G0027046__Lrrcc1	452.656	-0.913859	0.152984	-5.97355	2.32138e-09	3.99909e-07
MGP_BALBcJ_G0021287__Slc7a8	467.228	1.63932	0.276214	5.93499	2.93866e-09	4.95476e-07
MGP_BALBcJ_G0022507__Marf1	2842.57	-0.413126	0.0695979	-5.9359	2.92244e-09	4.95476e-07
MGP_BALBcJ_G0023826__Trem1	145.532	6.69324	1.12874	5.92985	3.03209e-09	5.05848e-07
MGP_BALBcJ_G0032288__Nav2	683.148	1.89979	0.321113	5.91627	3.29331e-09	5.43705e-07
MGP_BALBcJ_G0019778__Hif1a	2816.97	0.98443	0.167094	5.89148	3.8275e-09	6.22535e-07
MGP_BALBcJ_G0039953__NA	28.9956	3.83824	0.651594	5.89054	3.84936e-09	6.22535e-07
MGP_BALBcJ_G0030959__Mxd1	947.726	1.91688	0.325566	5.88783	3.91294e-09	6.26426e-07
MGP_BALBcJ_G0019282__Abca8b	163.164	-1.55459	0.264248	-5.88308	4.02706e-09	6.37204e-07
MGP_BALBcJ_G0023152__Fpr2	77.1741	4.14459	0.704658	5.8817	4.06067e-09	6.37204e-07
MGP_BALBcJ_G0018781__Slfn4	738.576	5.03385	0.856307	5.87856	4.13859e-09	6.43064e-07
MGP_BALBcJ_G0020550__Pdlim7	796.909	1.05257	0.179341	5.86908	4.38224e-09	6.74312e-07
MGP_BALBcJ_G0034335__4931406C07Rik	4109.26	0.413851	0.0706469	5.85801	4.68437e-09	7.13871e-07
MGP_BALBcJ_G0015903__Il1r1	611.046	1.47085	0.251374	5.85125	4.87894e-09	7.36441e-07
MGP_BALBcJ_G0031927__Zfp36	2073.49	1.46131	0.250395	5.83603	5.34584e-09	7.99304e-07
MGP_BALBcJ_G0024332__Spry4	145.483	1.19743	0.205287	5.83294	5.44588e-09	8.06651e-07
MGP_BALBcJ_G0003260__Gm10863	1443.19	-0.967528	0.166043	-5.82697	5.64439e-09	8.28314e-07
MGP_BALBcJ_G0020549__Dbn1	279.795	1.10937	0.191179	5.80279	6.52205e-09	9.4833e-07
MGP_BALBcJ_G0028670__Slc2a1	2076.24	1.0995	0.189836	5.79182	6.96261e-09	1.00319e-06
MGP_BALBcJ_G0022146__Arhgap8	926.343	-0.517319	0.0893667	-5.78872	7.09237e-09	1.00778e-06
MGP_BALBcJ_G0036197__Cdkl5	422.973	-0.680306	0.117537	-5.78803	7.12169e-09	1.00778e-06
MGP_BALBcJ_G0017390__Madcam1	108.67	2.10503	0.364081	5.78178	7.39153e-09	1.03671e-06
MGP_BALBcJ_G0031223__Clec4e	297.325	6.25832	1.09029	5.74003	9.4662e-09	1.31605e-06
MGP_BALBcJ_G0016999__Sgk1	1493.93	1.29784	0.22634	5.73404	9.8068e-09	1.35155e-06
MGP_BALBcJ_G0025161__Fbxw4	1421.16	-0.655653	0.115109	-5.69596	1.22682e-08	1.6762e-06
MGP_BALBcJ_G0029712__Areg	50.5389	4.62204	0.811868	5.6931	1.24756e-08	1.68997e-06
MGP_BALBcJ_G0016912__Akap12	865.567	1.1745	0.206361	5.69147	1.25951e-08	1.69169e-06
MGP_BALBcJ_G0023151__Fpr1	48.2593	5.04465	0.889971	5.66834	1.44191e-08	1.92041e-06
MGP_BALBcJ_G0016239__Ramp1	422.854	-1.32329	0.233882	-5.65794	1.53203e-08	2.02343e-06
MGP_BALBcJ_G0028747__Zc3h12a	480.411	1.14282	0.202852	5.63377	1.76309e-08	2.30936e-06
MGP_BALBcJ_G0005614__1300002E11Rik	604.564	-0.569711	0.101151	-5.63226	1.77862e-08	2.3106e-06
MGP_BALBcJ_G0024244__Hbegf	194.552	2.82656	0.502005	5.63054	1.79648e-08	2.31483e-06
MGP_BALBcJ_G0032424__Homer2	601.482	-0.940992	0.16777	-5.60883	2.03696e-08	2.60353e-06
MGP_BALBcJ_G0021651__AW549877	2356.51	-0.452054	0.0806637	-5.60418	2.09244e-08	2.63199e-06
MGP_BALBcJ_G0034233__Rhou	5396.84	-0.744971	0.13291	-5.60507	2.08174e-08	2.63199e-06
MGP_BALBcJ_G0025093__Pik3ap1	690.516	1.70208	0.304245	5.59445	2.2132e-08	2.76196e-06
MGP_BALBcJ_G0035239__Slc38a3	133.214	-2.09044	0.373859	-5.59151	2.25101e-08	2.7872e-06
MGP_BALBcJ_G0019530__Sdc1	978.502	0.830139	0.148814	5.57837	2.42778e-08	2.98278e-06
MGP_BALBcJ_G0022406__Itga5	837.447	1.53922	0.276064	5.57559	2.46692e-08	3.00756e-06
MGP_BALBcJ_G0019251__Tex2	2616.35	0.790714	0.141915	5.57175	2.52186e-08	3.05106e-06
MGP_BALBcJ_G0034708__Tmprss13	3092.87	-0.602351	0.108248	-5.56454	2.62847e-08	3.15596e-06
MGP_BALBcJ_G0023612__Ier3	1460.98	0.928553	0.167055	5.55838	2.72284e-08	3.22206e-06
MGP_BALBcJ_G0035165__Slco2a1	2238.09	0.907688	0.163303	5.5583	2.72419e-08	3.22206e-06
MGP_BALBcJ_G0035104__Plod2	248.161	1.27112	0.22909	5.54856	2.88039e-08	3.38158e-06
MGP_BALBcJ_G0030305__Actb	39686	0.643127	0.116137	5.53767	3.06517e-08	3.57205e-06
MGP_BALBcJ_G0000388__NA	15.9981	8.46887	1.53023	5.53437	3.12353e-08	3.61349e-06
MGP_BALBcJ_G0031430__Plekha5	1183.01	-0.499454	0.0903195	-5.52985	3.20498e-08	3.68085e-06
MGP_BALBcJ_G0027563__Ecm1	1185.29	0.794383	0.143889	5.5208	3.37469e-08	3.82641e-06
MGP_BALBcJ_G0033693__Ssbp4	1154.28	0.591144	0.107081	5.52052	3.38e-08	3.82641e-06
MGP_BALBcJ_G0018177__Rasgef1c	290.877	-1.42316	0.258043	-5.51518	3.48424e-08	3.91643e-06
MGP_BALBcJ_G0021071__Nt5dc2	92.4139	1.56037	0.283055	5.51261	3.53554e-08	3.92072e-06
MGP_BALBcJ_G0021591__Acod1	452.26	6.85225	1.24304	5.51251	3.53753e-08	3.92072e-06
MGP_BALBcJ_G0034081__Hp	24519.3	2.90585	0.528548	5.49779	3.84583e-08	4.23282e-06
MGP_BALBcJ_G0024936__Vps13a	964.038	-0.555385	0.101111	-5.49284	3.95511e-08	4.32307e-06
MGP_BALBcJ_G0028627__Plk3	608.195	1.84601	0.336792	5.48115	4.2256e-08	4.58709e-06
MGP_BALBcJ_G0031184__Il17ra	1062.6	0.775499	0.14152	5.47978	4.25845e-08	4.5913e-06
MGP_BALBcJ_G0022944__Adamts5	716.119	0.740006	0.135263	5.47087	4.4783e-08	4.79572e-06
MGP_BALBcJ_G0027158__Jade1	2569.48	-0.537976	0.0984411	-5.46495	4.6303e-08	4.92521e-06
MGP_BALBcJ_G0024935__Gna14	318.845	-1.2918	0.236758	-5.4562	4.86434e-08	5.13967e-06
MGP_BALBcJ_G0022367__Soat2	42.3481	4.2215	0.775283	5.44511	5.17736e-08	5.43417e-06
MGP_BALBcJ_G0019011__Csf3	42.3399	3.534	0.649357	5.44231	5.25935e-08	5.48391e-06
MGP_BALBcJ_G0027164__Slc7a11	478.362	3.80273	0.699113	5.43936	5.34731e-08	5.50321e-06
MGP_BALBcJ_G0030992__Mgll	10446.7	0.673942	0.123877	5.4404	5.31623e-08	5.50321e-06
MGP_BALBcJ_G0022748__Gm5483	22.7122	6.10705	1.12457	5.43055	5.61801e-08	5.7445e-06
MGP_BALBcJ_G0021569__Olfm4	28.4335	5.74932	1.05894	5.4293	5.65767e-08	5.74798e-06
MGP_BALBcJ_G0022582__38596	262.971	1.6538	0.305027	5.42183	5.89927e-08	5.95526e-06
MGP_BALBcJ_G0027511__S100a10	1296.8	1.03253	0.190556	5.41853	6.00924e-08	6.00485e-06
MGP_BALBcJ_G0035371__Cmtm8	620.744	-0.675641	0.124701	-5.41808	6.02417e-08	6.00485e-06
MGP_BALBcJ_G0017922__Lif	1181.32	1.82961	0.33803	5.41256	6.21301e-08	6.15437e-06
MGP_BALBcJ_G0017308__Mmp11	266.916	-1.14022	0.211328	-5.3955	6.83343e-08	6.7269e-06
MGP_BALBcJ_G0030194__Serpine1	419.418	2.37015	0.439667	5.39078	7.01544e-08	6.86344e-06
MGP_BALBcJ_G0017629__Dusp6	950.577	1.39217	0.258311	5.38952	7.06446e-08	6.869e-06
MGP_BALBcJ_G0026406__Shc4	115.274	1.66643	0.309732	5.38023	7.43917e-08	7.18924e-06
MGP_BALBcJ_G0035746__Ids	1599.81	-0.534546	0.0995007	-5.37229	7.77446e-08	7.46772e-06
MGP_BALBcJ_G0023129__Mllt4	5539.31	-0.591657	0.110206	-5.36865	7.93281e-08	7.57392e-06
MGP_BALBcJ_G0024852__Ms4a6d	580.531	1.88669	0.351544	5.36688	8.01122e-08	7.60299e-06
MGP_BALBcJ_G0019373__Sphk1	193.532	1.88912	0.352101	5.36529	8.08213e-08	7.62463e-06
MGP_BALBcJ_G0029026__Epha2	485.606	1.67691	0.31268	5.36303	8.18383e-08	7.67488e-06
MGP_BALBcJ_G0029706__Cxcl15	47.2327	2.09743	0.392214	5.34768	8.90885e-08	8.30567e-06
MGP_BALBcJ_G0034803__Crabp1	54.7265	3.27366	0.61316	5.339	9.34605e-08	8.66231e-06
MGP_BALBcJ_G0021421__Ctsb	68175.7	0.811618	0.152322	5.3283	9.91379e-08	9.1351e-06
MGP_BALBcJ_G0018926__Ngfr	109.96	2.70069	0.507028	5.3265	1.00122e-07	9.17242e-06
MGP_BALBcJ_G0020941__Acox2	212.806	1.27756	0.240496	5.31219	1.08318e-07	9.8243e-06
MGP_BALBcJ_G0034309__Gm16485	43.9947	2.68779	0.505992	5.31192	1.08477e-07	9.8243e-06
MGP_BALBcJ_G0026874__Ncoa3	3128.7	-0.353263	0.0666362	-5.30136	1.1494e-07	1.03505e-05
MGP_BALBcJ_G0026167__Pamr1	182.67	-1.60862	0.303642	-5.29775	1.17236e-07	1.04976e-05
MGP_BALBcJ_G0033186__Ifitm2	639.872	0.988525	0.186744	5.29348	1.20009e-07	1.06856e-05
MGP_BALBcJ_G0018549__Pfn1	6390.54	0.504497	0.0954838	5.28359	1.26676e-07	1.12161e-05
MGP_BALBcJ_G0031814__Plaur	383.54	3.01487	0.571425	5.27605	1.31995e-07	1.16222e-05
MGP_BALBcJ_G0023071__Tiam2	380.741	-0.892812	0.16942	-5.26982	1.36561e-07	1.19389e-05
MGP_BALBcJ_G0034019__Lrrc36	25.5973	-2.15542	0.409068	-5.26909	1.37099e-07	1.19389e-05
MGP_BALBcJ_G0018582__Spns3	113.031	-1.25629	0.239619	-5.24288	1.58087e-07	1.35434e-05
MGP_BALBcJ_G0028996__Capzb	4371.03	0.399644	0.0762172	5.24349	1.5757e-07	1.35434e-05
MGP_BALBcJ_G0030377__Slc7a1	546.303	1.20726	0.230258	5.24309	1.57906e-07	1.35434e-05
MGP_BALBcJ_G0026651__Id1	197.253	1.65794	0.316464	5.23896	1.61486e-07	1.37602e-05
MGP_BALBcJ_G0019280__Fam20a	1572.57	-1.68139	0.321597	-5.22826	1.71113e-07	1.45025e-05
MGP_BALBcJ_G0017821__Mmp19	784.368	1.81149	0.346644	5.22581	1.73399e-07	1.45407e-05
MGP_BALBcJ_G0027249__Ptx3	549.589	5.21403	0.99773	5.22589	1.7332e-07	1.45407e-05
MGP_BALBcJ_G0031879__Cyp2f2	1142.47	-1.08742	0.208174	-5.22361	1.75471e-07	1.46371e-05
MGP_BALBcJ_G0020192__Inhba	27.3354	4.89558	0.938794	5.21475	1.84062e-07	1.52733e-05
MGP_BALBcJ_G0028249__Nr4a3	180.737	4.22173	0.812228	5.19771	2.01754e-07	1.66542e-05
MGP_BALBcJ_G0022954__Cldn8	3055.55	-0.868223	0.167158	-5.19404	2.05777e-07	1.68982e-05
MGP_BALBcJ_G0021398__C1qtnf9	241.6	-1.39257	0.268224	-5.19182	2.08243e-07	1.70126e-05
MGP_BALBcJ_G0029523__Lgi2	137.886	2.06976	0.398738	5.19077	2.09422e-07	1.70212e-05
MGP_BALBcJ_G0025118__Loxl4	58.277	1.95889	0.377872	5.18399	2.17187e-07	1.75623e-05
MGP_BALBcJ_G0016691__Adamts4	544.538	2.80383	0.541236	5.18042	2.21383e-07	1.78106e-05
MGP_BALBcJ_G0025718__Cytip	2982.05	-1.09649	0.211708	-5.17925	2.22776e-07	1.78322e-05
MGP_BALBcJ_G0019315__Cd300lf	300.922	4.60591	0.890422	5.17273	2.30702e-07	1.83738e-05
MGP_BALBcJ_G0031395__Gprc5a	57.5263	2.35946	0.456273	5.17116	2.3265e-07	1.84363e-05
MGP_BALBcJ_G0033931__Mt2	4857.14	1.53851	0.297781	5.16658	2.38418e-07	1.87995e-05
MGP_BALBcJ_G0022656__Lpp	5678.51	-0.30981	0.0599954	-5.1639	2.41859e-07	1.88849e-05
MGP_BALBcJ_G0035705__Ddx26b	720.672	-0.554793	0.107437	-5.16388	2.41885e-07	1.88849e-05
MGP_BALBcJ_G0018504__Kctd11	449.41	1.02921	0.19945	5.16023	2.46649e-07	1.90689e-05
MGP_BALBcJ_G0020095__Adssl1	165.739	1.69359	0.328149	5.16103	2.45598e-07	1.90689e-05
MGP_BALBcJ_G0028305__Lpar1	303.662	0.866676	0.16803	5.15787	2.49774e-07	1.92168e-05
MGP_BALBcJ_G0032782__Syt9	267.022	-0.738008	0.14328	-5.15082	2.59348e-07	1.9857e-05
MGP_BALBcJ_G0027798__Tmem56	1083.69	-0.87675	0.17033	-5.14736	2.64173e-07	2.01292e-05
MGP_BALBcJ_G0024805__Fads2	4175.76	-0.649751	0.126341	-5.14284	2.70612e-07	2.05212e-05
MGP_BALBcJ_G0032044__Fxyd3	5699.46	-0.744605	0.144866	-5.13996	2.74798e-07	2.07394e-05
MGP_BALBcJ_G0032593__Rhog	1064.41	0.651669	0.126932	5.13401	2.8363e-07	2.13045e-05
MGP_BALBcJ_G0029614__Pdgfra	2105.52	0.952518	0.185666	5.13027	2.89327e-07	2.16299e-05
MGP_BALBcJ_G0017550__Fbxo7	716.043	0.626893	0.122269	5.12716	2.94139e-07	2.18864e-05
MGP_BALBcJ_G0016542__Rgs16	90.9017	2.43089	0.474435	5.12375	2.99519e-07	2.21826e-05
MGP_BALBcJ_G0027061__Cyp7b1	53.7148	2.35049	0.458894	5.12209	3.02173e-07	2.22751e-05
MGP_BALBcJ_G0032259__Saa3	833.555	2.02181	0.39498	5.11876	3.07554e-07	2.24628e-05
MGP_BALBcJ_G0035075__Nt5e	289.025	1.54305	0.301436	5.11899	3.0718e-07	2.24628e-05
MGP_BALBcJ_G0036093__Tbc1d8b	736.756	-0.420731	0.0822175	-5.11729	3.09958e-07	2.25345e-05
MGP_BALBcJ_G0020074__Tnfaip2	627.364	1.98309	0.388058	5.11028	3.21685e-07	2.32803e-05
MGP_BALBcJ_G0015405__Gm14005	314.64	1.63426	0.320138	5.10486	3.31042e-07	2.38485e-05
MGP_BALBcJ_G0026887__B4galt5	555.823	1.91686	0.375739	5.10158	3.36828e-07	2.41556e-05
MGP_BALBcJ_G0022404__Gpr84	14.7127	5.74353	1.12683	5.09708	3.44938e-07	2.46258e-05
MGP_BALBcJ_G0016087__Slc11a1	457.835	2.23082	0.439555	5.07518	3.87138e-07	2.75145e-05
MGP_BALBcJ_G0016753__Mndal	396.782	1.07103	0.211419	5.0659	4.06482e-07	2.87604e-05
MGP_BALBcJ_G0035463__Ccr1	445.798	2.97258	0.587155	5.06269	4.13375e-07	2.91181e-05
MGP_BALBcJ_G0028755__Sh3d21	314.495	-0.578763	0.114483	-5.05546	4.29356e-07	3.011e-05
MGP_BALBcJ_G0024575__Cyb5a	1195.25	-0.688646	0.136324	-5.05153	4.38294e-07	3.06015e-05
MGP_BALBcJ_G0028379__Nfib	2832.73	-0.493033	0.0977651	-5.04303	4.5821e-07	3.18517e-05
MGP_BALBcJ_G0031683__C5ar1	300.887	2.34636	0.467244	5.02169	5.12182e-07	3.54479e-05
MGP_BALBcJ_G0002701__Gm15848	63.1459	1.64443	0.327687	5.01829	5.21323e-07	3.59237e-05
MGP_BALBcJ_G0029702__Cxcl5	142.491	6.64752	1.32517	5.01636	5.26598e-07	3.61301e-05
MGP_BALBcJ_G0027859__Sgms2	367.197	1.93585	0.386281	5.0115	5.40086e-07	3.68958e-05
MGP_BALBcJ_G0031497__Nlrp12	19.7935	5.28056	1.05397	5.01018	5.4378e-07	3.69887e-05
MGP_BALBcJ_G0030383__Alox5ap	337.09	1.67928	0.335314	5.0081	5.49707e-07	3.7232e-05
MGP_BALBcJ_G0024489__Tubb6	942.885	1.5588	0.31187	4.99824	5.78547e-07	3.90187e-05
MGP_BALBcJ_G0028073__Fut9	39.4728	-1.91252	0.383207	-4.99081	6.01266e-07	4.03791e-05
MGP_BALBcJ_G0016310__Phlpp1	760.007	-0.554592	0.111188	-4.98786	6.10533e-07	4.08284e-05
MGP_BALBcJ_G0025231__Tcf7l2	1099.13	-0.78805	0.158054	-4.98596	6.16543e-07	4.10571e-05
MGP_BALBcJ_G0023827__Trem3	12.5163	8.08382	1.62379	4.97835	6.41283e-07	4.23487e-05
MGP_BALBcJ_G0027654__Ngf	41.8827	3.12684	0.62807	4.97848	6.40845e-07	4.23487e-05
MGP_BALBcJ_G0027450__S100a6	1909.43	1.10313	0.221799	4.97355	6.57369e-07	4.32309e-05
MGP_BALBcJ_G0023076__NA	209.93	1.05796	0.21313	4.96394	6.90787e-07	4.50623e-05
MGP_BALBcJ_G0031401__Emp1	3430.5	1.82442	0.367538	4.9639	6.90904e-07	4.50623e-05
MGP_BALBcJ_G0000726__NA	57.3412	3.28886	0.662677	4.963	6.94142e-07	4.5088e-05
MGP_BALBcJ_G0029489__Slc2a9	585.502	-1.12486	0.227048	-4.95429	7.2594e-07	4.69609e-05
MGP_BALBcJ_G0023112__Map3k4	1294.21	-0.446957	0.0902468	-4.95261	7.32248e-07	4.71764e-05
MGP_BALBcJ_G0017792__Timeless	285.714	0.849555	0.171786	4.94542	7.59791e-07	4.87527e-05
MGP_BALBcJ_G0024941__Pcsk5	873.624	1.43466	0.290391	4.94047	7.7936e-07	4.98068e-05
MGP_BALBcJ_G0018763__Ccl11	571.365	1.23882	0.251216	4.9313	8.16862e-07	5.19938e-05
MGP_BALBcJ_G0027530__NA	760.446	-0.860534	0.174562	-4.92968	8.2364e-07	5.22155e-05
MGP_BALBcJ_G0018227__Hspa4	5895.45	0.59547	0.121154	4.91497	8.8795e-07	5.60682e-05
MGP_BALBcJ_G0026210__Bdnf	34.2258	2.23988	0.456638	4.90516	9.33524e-07	5.85139e-05
MGP_BALBcJ_G0032070__Slc7a10	463.558	-1.04103	0.212236	-4.90504	9.34066e-07	5.85139e-05
MGP_BALBcJ_G0033747__Cyp4f18	188.532	3.68329	0.751386	4.902	9.48681e-07	5.91954e-05
MGP_BALBcJ_G0027229__Rap2b	504.955	0.752948	0.153813	4.89521	9.82009e-07	6.10347e-05
MGP_BALBcJ_G0022782__Cd80	46.8118	3.00968	0.614979	4.89395	9.88315e-07	6.11867e-05
MGP_BALBcJ_G0036007__Pof1b	219.935	-1.0153	0.207654	-4.8894	1.01142e-06	6.23738e-05
MGP_BALBcJ_G0016744__Ackr1	107.784	1.31951	0.270056	4.88604	1.02885e-06	6.32028e-05
MGP_BALBcJ_G0022672__Atp13a4	1396.8	-1.49077	0.305355	-4.8821	1.04963e-06	6.42301e-05
MGP_BALBcJ_G0030237__Zfp113	827.26	-0.605995	0.124185	-4.87978	1.06202e-06	6.47381e-05
MGP_BALBcJ_G0024678__Cfl1	9814.73	0.524175	0.107507	4.87571	1.08417e-06	6.58353e-05
MGP_BALBcJ_G0033187__Ifitm1	234.213	2.131	0.437326	4.87279	1.10031e-06	6.65604e-05
MGP_BALBcJ_G0024125__Impact	1098.57	0.381236	0.0785412	4.85396	1.2102e-06	7.29296e-05
MGP_BALBcJ_G0033525__Msr1	544.003	3.41079	0.703185	4.85049	1.2316e-06	7.39378e-05
MGP_BALBcJ_G0031390__Crebl2	755.011	-0.56104	0.115881	-4.84152	1.28852e-06	7.70632e-05
MGP_BALBcJ_G0034332__Hephl1	1083.52	-1.36444	0.282074	-4.83716	1.31707e-06	7.84748e-05
MGP_BALBcJ_G0023873__Plin4	4288.51	0.910468	0.188691	4.82517	1.39883e-06	8.3034e-05
MGP_BALBcJ_G0032040__Fxyd5	876.102	1.69745	0.351891	4.8238	1.40848e-06	8.32949e-05
MGP_BALBcJ_G0025221__Pdcd4	7435.48	1.25464	0.260327	4.81948	1.4393e-06	8.47196e-05
MGP_BALBcJ_G0027165__Noct	610.159	1.82488	0.37869	4.81894	1.44326e-06	8.47196e-05
MGP_BALBcJ_G0001576__NA	22.6571	3.74878	0.778416	4.81591	1.46531e-06	8.5349e-05
MGP_BALBcJ_G0016127__Chpf	938.296	0.391871	0.0813813	4.81525	1.47014e-06	8.5349e-05
MGP_BALBcJ_G0030135__Clip2	891.857	0.631177	0.131059	4.81599	1.46475e-06	8.5349e-05
MGP_BALBcJ_G0035735__Slitrk4	48.4606	-2.46465	0.511939	-4.81435	1.47678e-06	8.54218e-05
MGP_BALBcJ_G0031498__Myadm	1390.1	0.757995	0.157953	4.79887	1.59566e-06	9.1962e-05
MGP_BALBcJ_G0029496__Bod1l	1920.94	-0.344484	0.071908	-4.79062	1.66267e-06	9.54773e-05
MGP_BALBcJ_G0028654__Tmem125	319.061	0.83996	0.175428	4.78805	1.68411e-06	9.63591e-05
MGP_BALBcJ_G0016079__Cxcr2	164.293	4.47993	0.93637	4.78436	1.71534e-06	9.7793e-05
MGP_BALBcJ_G0017469__Gadd45b	244.235	1.8225	0.381213	4.78081	1.74594e-06	9.91159e-05
MGP_BALBcJ_G0031474__Arntl2	1457.55	-0.930668	0.194692	-4.78022	1.75105e-06	9.91159e-05
MGP_BALBcJ_G0017152__Lilrb4a	726.033	3.02488	0.632958	4.77895	1.76209e-06	9.93856e-05
MGP_BALBcJ_G0023594__Tnf	87.5339	2.10425	0.440536	4.77656	1.78316e-06	0.000100218
MGP_BALBcJ_G0029400__Fndc4	78.9125	1.32945	0.278372	4.77579	1.79005e-06	0.000100249
MGP_BALBcJ_G0016864__Kcnk2	98.3363	-1.3189	0.276295	-4.77351	1.81046e-06	0.000101035
MGP_BALBcJ_G0024723__Ehd1	1761.32	0.7366	0.154398	4.77077	1.83521e-06	0.000102057
MGP_BALBcJ_G0020750__Vcan	992.408	2.70222	0.567334	4.76301	1.90728e-06	0.000105326
MGP_BALBcJ_G0028808__Marcksl1	4725.88	0.589347	0.123718	4.76361	1.90155e-06	0.000105326
MGP_BALBcJ_G0016634__Dcaf6	1898.02	-0.467818	0.0983475	-4.75679	1.96698e-06	0.000107871
MGP_BALBcJ_G0023530__Tap2	2477.23	0.48785	0.102551	4.75713	1.96364e-06	0.000107871
MGP_BALBcJ_G0030145__Cldn4	3723.02	1.27487	0.268087	4.75543	1.98026e-06	0.000108225
MGP_BALBcJ_G0021156__Ero1l	2821.67	0.46857	0.0988075	4.74225	2.11358e-06	0.000115114
MGP_BALBcJ_G0033711__Ccdc124	551.17	0.464683	0.0980387	4.73979	2.13936e-06	0.000116119
MGP_BALBcJ_G0033920__Ces1f	256.986	-1.84157	0.389366	-4.72965	2.24905e-06	0.000121656
MGP_BALBcJ_G0021821__Deptor	9250.85	-0.769405	0.162841	-4.72487	2.3026e-06	0.000124129
MGP_BALBcJ_G0019952__Foxn3	750.996	-0.528763	0.112051	-4.71896	2.37048e-06	0.000127355
MGP_BALBcJ_G0024836__Ms4a8a	37.288	1.61209	0.341956	4.71431	2.42537e-06	0.000129864
MGP_BALBcJ_G0017294__Lrrc75b	1255.86	-1.13478	0.241139	-4.70591	2.52735e-06	0.000134869
MGP_BALBcJ_G0016755__Ifi202b	529.024	1.40126	0.298843	4.68895	2.74617e-06	0.000145597
MGP_BALBcJ_G0023283__Rps2	6440.86	0.323756	0.0690474	4.6889	2.74676e-06	0.000145597
MGP_BALBcJ_G0033091__Bub3	891.696	0.386809	0.082512	4.68791	2.76004e-06	0.000145813
MGP_BALBcJ_G0029502__Bst1	205.238	1.93421	0.41275	4.68615	2.78393e-06	0.000146586
MGP_BALBcJ_G0033815__Ddx39	735.113	0.69961	0.149484	4.68017	2.86632e-06	0.000150425
MGP_BALBcJ_G0028693__Ctps	1255.47	0.972045	0.207822	4.67731	2.90669e-06	0.00015204
MGP_BALBcJ_G0023126__Sod2	2189.57	0.889115	0.190162	4.67556	2.93151e-06	0.000152834
MGP_BALBcJ_G0020480__Ninj1	827.472	0.775048	0.165799	4.67464	2.94475e-06	0.000153021
MGP_BALBcJ_G0023617__Ppp1r18	712.017	0.93443	0.199952	4.67328	2.96428e-06	0.000153532
MGP_BALBcJ_G0017617__Btg1	520.08	1.18628	0.253972	4.67093	2.99835e-06	0.000154791
MGP_BALBcJ_G0033914__Slc6a2	17.81	3.44287	0.737341	4.66931	3.02214e-06	0.000155513
MGP_BALBcJ_G0017399__Fstl3	134.721	0.862429	0.184809	4.66659	3.06239e-06	0.000156567
MGP_BALBcJ_G0030794__Abcg2	3353.19	-1.02275	0.219138	-4.66715	3.05407e-06	0.000156567
MGP_BALBcJ_G0021385__Phf11d	342.579	-0.688122	0.14792	-4.65198	3.28759e-06	0.00016754
MGP_BALBcJ_G0028971__Ece1	3992.92	0.627269	0.134946	4.64829	3.34702e-06	0.000170022
MGP_BALBcJ_G0027868__NA	653.479	-0.633614	0.136343	-4.64722	3.36446e-06	0.000170362
MGP_BALBcJ_G0025493__Ppp1r26	311.56	-0.64008	0.137861	-4.64295	3.43477e-06	0.000173368
MGP_BALBcJ_G0029050__Pdpn	428.993	1.98846	0.429122	4.63379	3.59032e-06	0.000180644
MGP_BALBcJ_G0032831__St5	2307.8	-0.698343	0.15087	-4.62877	3.67837e-06	0.000184489
MGP_BALBcJ_G0025821__Hoxd9	118.972	-1.23536	0.267008	-4.62665	3.71619e-06	0.000185798
MGP_BALBcJ_G0017329__Slc19a1	114.939	0.921851	0.199373	4.62374	3.76874e-06	0.000187832
MGP_BALBcJ_G0020599__Dapk1	4980.83	-0.711509	0.154126	-4.61642	3.90413e-06	0.000193364
MGP_BALBcJ_G0033334__Rab20	467.396	1.21027	0.262161	4.61652	3.9022e-06	0.000193364
MGP_BALBcJ_G0019973__Lgmn	4415.28	1.05736	0.229096	4.61535	3.92434e-06	0.00019376
MGP_BALBcJ_G0024806__Fads1	5790.97	-0.734117	0.15912	-4.61362	3.95725e-06	0.000194529
MGP_BALBcJ_G0033567__Acsl1	12603.8	-1.25028	0.271019	-4.61324	3.96447e-06	0.000194529
MGP_BALBcJ_G0019688__Nfkbia	1163.87	0.957284	0.207727	4.60838	4.05827e-06	0.000198517
MGP_BALBcJ_G0020811__Enc1	397.94	0.87652	0.190437	4.60267	4.17109e-06	0.000203408
MGP_BALBcJ_G0026290__Bmf	6589.96	-0.762025	0.165599	-4.60163	4.19207e-06	0.000203804
MGP_BALBcJ_G0033518__D8Ertd82e	1335.9	0.815743	0.177753	4.5892	4.44942e-06	0.000215654
MGP_BALBcJ_G0023732__Cd2ap	1899.64	-0.499166	0.108843	-4.58613	4.51542e-06	0.000218186
MGP_BALBcJ_G0019937__Dio2	175.896	1.77324	0.387206	4.57959	4.65892e-06	0.000223336
MGP_BALBcJ_G0026213__Ccdc34	727.523	-0.954804	0.208468	-4.58011	4.64734e-06	0.000223336
MGP_BALBcJ_G0029902__Coro1c	1057.94	1.00298	0.219021	4.57935	4.66428e-06	0.000223336
MGP_BALBcJ_G0020980__Kcnk5	2460.87	-1.45724	0.319001	-4.56813	4.92102e-06	0.00023492
MGP_BALBcJ_G0027421__Il6ra	3952.81	-1.08157	0.236881	-4.56586	4.97453e-06	0.000236761
MGP_BALBcJ_G0017104__Ddo	836.85	-0.471761	0.103396	-4.56266	5.05103e-06	0.000239682
MGP_BALBcJ_G0025358__Etl4	3054.24	-0.526906	0.115544	-4.56024	5.10954e-06	0.000241735
MGP_BALBcJ_G0016558__Qsox1	45985	1.36814	0.300357	4.55506	5.23715e-06	0.000245119
MGP_BALBcJ_G0024012__Cyp1b1	792.616	1.72699	0.379172	4.55464	5.2476e-06	0.000245119
MGP_BALBcJ_G0025044__Ankrd1	28.2411	2.12796	0.467259	4.55414	5.26005e-06	0.000245119
MGP_BALBcJ_G0027056__NA	32.2688	3.1126	0.683549	4.55359	5.27387e-06	0.000245119
MGP_BALBcJ_G0029735__Ccni	4668.83	-0.365038	0.0801261	-4.5558	5.21874e-06	0.000245119
MGP_BALBcJ_G0035287__Celsr3	15.7682	3.03763	0.666976	4.55433	5.25517e-06	0.000245119
MGP_BALBcJ_G0023965__Emilin2	815.637	2.2833	0.501704	4.55109	5.33686e-06	0.000247321
MGP_BALBcJ_G0034284__Casp4	482.591	0.879156	0.193227	4.54986	5.36809e-06	0.000248044
MGP_BALBcJ_G0016322__Serpinb2	110.697	5.39888	1.18815	4.54392	5.52167e-06	0.000254398
MGP_BALBcJ_G0024488__Cidea	5844.98	-0.87855	0.193422	-4.54215	5.5683e-06	0.000255803
MGP_BALBcJ_G0018974__Srcin1	1249.99	-1.20745	0.265974	-4.53974	5.6325e-06	0.000256521
MGP_BALBcJ_G0025798__Itga6	12885.5	-0.606366	0.133557	-4.54012	5.62225e-06	0.000256521
MGP_BALBcJ_G0033073__Fgfr2	766.422	-0.930121	0.204832	-4.5409	5.60155e-06	0.000256521
MGP_BALBcJ_G0020016__Serpina3n	2453.76	2.17943	0.480332	4.53735	5.6966e-06	0.000258697
MGP_BALBcJ_G0020797__Sv2c	59.9235	-1.88916	0.416549	-4.53527	5.75306e-06	0.00025943
MGP_BALBcJ_G0021856__Myc	745.775	1.32523	0.292185	4.53561	5.74382e-06	0.00025943
MGP_BALBcJ_G0034990__Nedd4	17445.5	-0.296011	0.0652733	-4.53495	5.76183e-06	0.00025943
MGP_BALBcJ_G0033140__Adam8	706.927	3.30491	0.728934	4.5339	5.79048e-06	0.000259981
MGP_BALBcJ_G0035139__Pik3cb	1918.31	-0.566674	0.125088	-4.53019	5.89311e-06	0.000263842
MGP_BALBcJ_G0025181__Trim8	1494.13	0.571132	0.126146	4.52756	5.96674e-06	0.000266385
MGP_BALBcJ_G0015941__Sdpr	1339.77	-0.918003	0.203032	-4.52146	6.14133e-06	0.00027341
MGP_BALBcJ_G0033189__Ifitm6	52.5412	2.44636	0.541258	4.51977	6.19081e-06	0.000274841
MGP_BALBcJ_G0027193__Spg20	1707.97	-0.378609	0.0838387	-4.51593	6.304e-06	0.000279084
MGP_BALBcJ_G0001443__NA	8.74987	7.54957	1.67273	4.51333	6.38177e-06	0.00028174
MGP_BALBcJ_G0024236__Tmem173	1535.64	0.52749	0.116929	4.5112	6.44613e-06	0.000283791
MGP_BALBcJ_G0029711__Ereg	21.6219	4.21866	0.936222	4.50605	6.6047e-06	0.000289966
MGP_BALBcJ_G0005815__4833407H14Rik	26.3378	2.49013	0.552788	4.50469	6.64712e-06	0.000291023
MGP_BALBcJ_G0022366__Igfbp6	579.774	1.20951	0.268764	4.50027	6.78662e-06	0.000296312
MGP_BALBcJ_G0017663__Phlda1	882.16	1.57103	0.349745	4.49194	7.05789e-06	0.000307266
MGP_BALBcJ_G0033860__Junb	1908.73	1.33233	0.296641	4.49138	7.07628e-06	0.000307266
MGP_BALBcJ_G0023415__4930539E08Rik	767.313	-0.850264	0.189395	-4.48938	7.14309e-06	0.000309319
MGP_BALBcJ_G0030506__Flnc	399.961	1.4175	0.315896	4.48724	7.21516e-06	0.000311589
MGP_BALBcJ_G0005814__Mirt1	248.528	3.21223	0.716381	4.48397	7.32675e-06	0.000315548
MGP_BALBcJ_G0021602__Spry2	428.463	0.639523	0.14275	4.48004	7.46304e-06	0.000320547
MGP_BALBcJ_G0034665__Mcam	1023.49	0.574429	0.128273	4.47819	7.52781e-06	0.000322455
MGP_BALBcJ_G0027244__Ssr3	8072.91	0.552668	0.123494	4.47528	7.63126e-06	0.000326005
MGP_BALBcJ_G0016771__Grem2	94.9775	2.09651	0.468958	4.47057	7.80132e-06	0.000332374
MGP_BALBcJ_G0017810__NA	5937.35	0.229653	0.0513925	4.46862	7.87274e-06	0.000334518
MGP_BALBcJ_G0026212__Lgr4	14975.8	-0.981512	0.219875	-4.46395	8.04619e-06	0.000340974
MGP_BALBcJ_G0035972__Tlr13	381.966	1.94867	0.437583	4.45326	8.4578e-06	0.00035746
MGP_BALBcJ_G0022402__Nfe2	19.2949	4.07093	0.914302	4.4525	8.48769e-06	0.00035777
MGP_BALBcJ_G0021817__Enpp2	355.655	-1.49311	0.335789	-4.44658	8.72482e-06	0.000365819
MGP_BALBcJ_G0028851__Rcc1	439.299	0.655225	0.147354	4.44659	8.72436e-06	0.000365819
MGP_BALBcJ_G0018160__Btnl9	1275.11	-1.05782	0.238007	-4.4445	8.80984e-06	0.00036841
MGP_BALBcJ_G0028793__Rnf19b	1101.16	0.914069	0.206244	4.43198	9.33705e-06	0.000388406
MGP_BALBcJ_G0029142__Per3	909.991	-1.61371	0.36407	-4.43243	9.31782e-06	0.000388406
MGP_BALBcJ_G0016600__Dnm3	408.951	-0.707506	0.159678	-4.43083	9.38698e-06	0.000389462
MGP_BALBcJ_G0025019__Pten	3002.51	-0.281555	0.0635591	-4.42981	9.43156e-06	0.000390289
MGP_BALBcJ_G0020914__Emb	336.567	1.41143	0.318728	4.4283	9.49788e-06	0.000390992
MGP_BALBcJ_G0029703__Ppbp	20.6739	3.23362	0.730194	4.42845	9.49149e-06	0.000390992
MGP_BALBcJ_G0034292__Mmp3	2350.53	1.48195	0.334768	4.4268	9.56434e-06	0.000391693
MGP_BALBcJ_G0034963__Rora	1725.18	-0.585471	0.132247	-4.42711	9.55055e-06	0.000391693
MGP_BALBcJ_G0024699__Cdc42ep2	161.636	1.02116	0.231057	4.41953	9.89173e-06	0.000404057
MGP_BALBcJ_G0025067__Plce1	989.504	-0.722012	0.163643	-4.41211	1.02367e-05	0.000417073
MGP_BALBcJ_G0017668__Kcnc2	28.5911	-2.14571	0.486968	-4.40628	1.05162e-05	0.000427364
MGP_BALBcJ_G0035887__Amer1	662.812	-0.733993	0.166739	-4.40204	1.07236e-05	0.000434674
MGP_BALBcJ_G0031080__Itpr1	2558.06	-0.566215	0.128659	-4.4009	1.07803e-05	0.000435861
MGP_BALBcJ_G0031222__Clec4d	317.134	5.09661	1.15829	4.40013	1.08188e-05	0.000436304
MGP_BALBcJ_G0017796__Il23a	39.2174	2.98917	0.680417	4.39314	1.11725e-05	0.000447023
MGP_BALBcJ_G0018889__Nme1	395.606	0.822006	0.187094	4.39355	1.11517e-05	0.000447023
MGP_BALBcJ_G0020848__Pik3r1	24213.4	-0.35508	0.080835	-4.39266	1.11974e-05	0.000447023
MGP_BALBcJ_G0024845__Ms4a4a	235.932	1.34185	0.305423	4.39343	1.11577e-05	0.000447023
MGP_BALBcJ_G0031215__Clec4a1	143.937	1.26219	0.288087	4.38126	1.17993e-05	0.000469868
MGP_BALBcJ_G0016706__Cd244	58.182	1.71585	0.391807	4.37933	1.19047e-05	0.000472875
MGP_BALBcJ_G0025725__Pkp4	1791.69	0.600001	0.137182	4.37377	1.22117e-05	0.000483859
MGP_BALBcJ_G0018761__Ccl2	454.793	3.7587	0.85978	4.3717	1.23282e-05	0.000487257
MGP_BALBcJ_G0018796__Ccl3	137.577	3.85541	0.882512	4.36868	1.24999e-05	0.000492813
MGP_BALBcJ_G0021041__Il17rd	204.7	-0.84309	0.193259	-4.36248	1.28596e-05	0.000505737
MGP_BALBcJ_G0028883__Sfn	707.742	1.54675	0.354718	4.3605	1.29768e-05	0.000509082
MGP_BALBcJ_G0016979__Tnfaip3	316.939	1.73213	0.397318	4.35957	1.3032e-05	0.000509986
MGP_BALBcJ_G0029034__Fblim1	2409.85	0.470179	0.107892	4.35786	1.31338e-05	0.000512703
MGP_BALBcJ_G0023980__Ehd3	1173.13	-0.781548	0.179389	-4.35673	1.32019e-05	0.000514096
MGP_BALBcJ_G0030810__Tnip3	68.0013	2.31473	0.531758	4.35298	1.343e-05	0.000521697
MGP_BALBcJ_G0024090__Arhgap12	1281.54	-0.380076	0.0873553	-4.35092	1.35565e-05	0.000525324
MGP_BALBcJ_G0019124__Tubg1	415.03	0.508294	0.116851	4.34994	1.36174e-05	0.000526397
MGP_BALBcJ_G0029608__Rasl11b	444.972	2.6018	0.59843	4.34771	1.37565e-05	0.000530479
MGP_BALBcJ_G0031229__Cd163	999.37	1.24274	0.285912	4.34658	1.38275e-05	0.000531922
MGP_BALBcJ_G0030823__Gng12	2510.77	0.471695	0.108552	4.34533	1.39065e-05	0.000533665
MGP_BALBcJ_G0032488__Picalm	3197.87	0.722048	0.166189	4.34474	1.39443e-05	0.000533822
MGP_BALBcJ_G0019524__Ldah	729.391	-0.437933	0.100828	-4.34337	1.4031e-05	0.00053585
MGP_BALBcJ_G0018793__Ccl9	1191.54	1.32928	0.306191	4.34136	1.41604e-05	0.00053949
MGP_BALBcJ_G0019816__Arg2	625.456	1.5119	0.348404	4.33951	1.42801e-05	0.000542052
MGP_BALBcJ_G0025770__Dhrs9	76.5848	2.48519	0.572721	4.33926	1.4296e-05	0.000542052
MGP_BALBcJ_G0024976__Dock8	2751.53	-0.491301	0.113267	-4.33754	1.44089e-05	0.000545027
MGP_BALBcJ_G0025218__Dusp5	1320.63	1.15173	0.265705	4.33462	1.46014e-05	0.000550994
MGP_BALBcJ_G0019980__Tmem251	269.36	0.709327	0.163689	4.33337	1.46844e-05	0.000551499
MGP_BALBcJ_G0036876__Gm11611	372.823	-1.41835	0.327296	-4.33353	1.46735e-05	0.000551499
MGP_BALBcJ_G0016619__Sele	59.76	2.45413	0.5669	4.32904	1.49763e-05	0.000560196
MGP_BALBcJ_G0017425__Midn	3164.24	0.431765	0.0997405	4.32888	1.49866e-05	0.000560196
MGP_BALBcJ_G0031468__Itpr2	3918.14	-0.779186	0.180057	-4.32745	1.50844e-05	0.000562524
MGP_BALBcJ_G0000009__Ighd	102.124	-5.50893	1.2735	-4.32582	1.51967e-05	0.000565381
MGP_BALBcJ_G0004060__Gm26756	34.0946	3.43444	0.794469	4.32294	1.53964e-05	0.00057147
MGP_BALBcJ_G0022271__Rnd1	100.297	1.54537	0.357565	4.32192	1.54678e-05	0.000572778
MGP_BALBcJ_G0028749__Csf3r	480.211	3.08379	0.713791	4.3203	1.5582e-05	0.000575661
MGP_BALBcJ_G0034263__BC021891	440.525	-0.660365	0.153055	-4.31455	1.59929e-05	0.000589467
MGP_BALBcJ_G0023272__Pkd1	2698.83	-0.270435	0.0627524	-4.30956	1.63577e-05	0.000601516
MGP_BALBcJ_G0030613__Ephb6	244.689	-1.00597	0.233797	-4.30274	1.68696e-05	0.000616052
MGP_BALBcJ_G0031906__Zfp60	581.272	-0.449194	0.104397	-4.30274	1.68696e-05	0.000616052
MGP_BALBcJ_G0034869__Neo1	2631.5	-0.41936	0.0974614	-4.30283	1.68632e-05	0.000616052
MGP_BALBcJ_G0031743__Snrpd2	636.552	0.423777	0.0986346	4.29643	1.73568e-05	0.000632386
MGP_BALBcJ_G0028834__Nkain1	47.2748	1.69847	0.395396	4.29562	1.74204e-05	0.000633247
MGP_BALBcJ_G0019096__Fkbp10	344.925	0.913859	0.212767	4.29511	1.74604e-05	0.000633249
MGP_BALBcJ_G0022414__Mefv	94.5062	4.38894	1.02322	4.28934	1.79206e-05	0.000648411
MGP_BALBcJ_G0028986__Pla2g2d	68.7812	-2.4682	0.575493	-4.28885	1.79603e-05	0.000648411
MGP_BALBcJ_G0029210__Mrpl20	715.233	0.384163	0.089627	4.28624	1.81719e-05	0.000653075
MGP_BALBcJ_G0033933__Nup93	509.388	0.587979	0.13717	4.2865	1.81511e-05	0.000653075
MGP_BALBcJ_G0026299__Ivd	1441.64	-0.554226	0.129351	-4.28466	1.8302e-05	0.000656264
MGP_BALBcJ_G0029377__Emilin1	565.637	1.48973	0.347751	4.28389	1.83652e-05	0.000657044
MGP_BALBcJ_G0023063__Ripk4	1045.06	-0.401717	0.0938091	-4.28228	1.84989e-05	0.000659235
MGP_BALBcJ_G0025618__Cutal	145.493	-1.52237	0.355598	-4.28115	1.85928e-05	0.000659235
MGP_BALBcJ_G0026219__Muc15	33284.5	-0.945517	0.220816	-4.28193	1.8528e-05	0.000659235
MGP_BALBcJ_G0031393__Apold1	136.293	1.72054	0.401867	4.28137	1.85742e-05	0.000659235
MGP_BALBcJ_G0031956__Rasgrp4	136.096	1.70043	0.397511	4.27771	1.88829e-05	0.000668026
MGP_BALBcJ_G0017658__Csrp2	137.571	1.14896	0.269256	4.26716	1.97973e-05	0.000698814
MGP_BALBcJ_G0018023__Zrsr1	454.945	-0.516734	0.121168	-4.26462	2.0024e-05	0.000705246
MGP_BALBcJ_G0017244__Tet1	116.022	-1.15933	0.272263	-4.25812	2.06157e-05	0.00072065
MGP_BALBcJ_G0023797__Gltscr1l	927.124	-0.471015	0.110624	-4.25782	2.06433e-05	0.00072065
MGP_BALBcJ_G0026346__NA	1323.72	-0.7228	0.169713	-4.25897	2.05376e-05	0.00072065
MGP_BALBcJ_G0031860__Tgfb1	907.33	0.746661	0.175322	4.25879	2.05533e-05	0.00072065
MGP_BALBcJ_G0017467__Timm13	909.913	0.300131	0.0705242	4.25571	2.08384e-05	0.000725862
MGP_BALBcJ_G0023830__NA	60.5364	2.85391	0.671626	4.24926	2.14475e-05	0.000745443
MGP_BALBcJ_G0031327__Olr1	67.7542	4.32192	1.01724	4.24868	2.15033e-05	0.000745746
MGP_BALBcJ_G0033641__Lpl	13831.1	-0.92532	0.218451	-4.23582	2.27718e-05	0.000788013
MGP_BALBcJ_G0016689__Fcer1g	591.974	1.49568	0.353277	4.23373	2.29846e-05	0.000793644
MGP_BALBcJ_G0031778__Bcl3	1069.86	0.883696	0.208935	4.22952	2.34192e-05	0.000806892
MGP_BALBcJ_G0032582__Numa1	5259.17	-0.370579	0.0876641	-4.22726	2.36553e-05	0.00081326
MGP_BALBcJ_G0028279__Slc44a1	4019.63	-0.36028	0.0852546	-4.22593	2.3796e-05	0.000816326
MGP_BALBcJ_G0032875__Sox6	110.767	-0.773429	0.183135	-4.22328	2.40777e-05	0.000824208
MGP_BALBcJ_G0032849__Lyve1	487.361	1.8278	0.433596	4.21545	2.49284e-05	0.000851487
MGP_BALBcJ_G0026969__Slco4a1	51.7983	1.42377	0.338055	4.21165	2.53507e-05	0.00086405
MGP_BALBcJ_G0023876__Sema6b	261.111	0.867077	0.205988	4.20935	2.56108e-05	0.000871041
MGP_BALBcJ_G0030954__Tia1	2065.05	-0.444497	0.105765	-4.2027	2.63755e-05	0.000895129
MGP_BALBcJ_G0018417__Map2k4	1827.77	0.425559	0.10128	4.20182	2.64781e-05	0.000896691
MGP_BALBcJ_G0033386__Agpat5	314.86	0.630506	0.150155	4.19902	2.68071e-05	0.000905896
MGP_BALBcJ_G0030268__3110082I17Rik	208.274	0.773065	0.184267	4.19534	2.72457e-05	0.000918761
MGP_BALBcJ_G0033439__Gpat4	5050.11	-0.770641	0.18374	-4.19419	2.73852e-05	0.000921505
MGP_BALBcJ_G0018797__Ccl4	88.3767	4.16477	0.994116	4.18942	2.79672e-05	0.000939094
MGP_BALBcJ_G0025381__Il1rn	954.935	4.58143	1.09437	4.18636	2.83468e-05	0.000949784
MGP_BALBcJ_G0034191__Slc7a5	3117.57	1.20376	0.287577	4.18589	2.84054e-05	0.000949784
MGP_BALBcJ_G0022039__Maff	290.452	1.42827	0.341318	4.18457	2.85712e-05	0.000953314
MGP_BALBcJ_G0016580__Tnr	9.70293	-3.96976	0.949	-4.1831	2.87561e-05	0.000957468
MGP_BALBcJ_G0016970__Abracl	628.726	0.530203	0.126862	4.17937	2.92318e-05	0.000965387
MGP_BALBcJ_G0020629__NA	1392.8	-0.711284	0.170149	-4.18035	2.91064e-05	0.000965387
MGP_BALBcJ_G0033620__Cpe	825.807	0.68694	0.164366	4.17933	2.92369e-05	0.000965387
MGP_BALBcJ_G0033749__Tpm4	5185.22	0.783825	0.187569	4.17887	2.92958e-05	0.000965387
MGP_BALBcJ_G0033771__Hmox1	2566.52	0.9667	0.231332	4.17885	2.92984e-05	0.000965387
MGP_BALBcJ_G0018774__Nle1	201.592	0.696515	0.166916	4.17285	3.00814e-05	0.00098913
MGP_BALBcJ_G0032241__Grwd1	282.426	0.940851	0.22569	4.16878	3.06232e-05	0.00100486
MGP_BALBcJ_G0020459__Atxn1	1267.33	-0.431238	0.103494	-4.1668	3.08908e-05	0.00101155
MGP_BALBcJ_G0022008__Tst	448.457	-0.851655	0.204562	-4.1633	3.13681e-05	0.00102506
MGP_BALBcJ_G0015907__Il18rap	140.904	3.2288	0.775935	4.16118	3.16612e-05	0.00103251
MGP_BALBcJ_G0031211__Slc2a3	82.7542	1.74834	0.420377	4.15899	3.19655e-05	0.00104029
MGP_BALBcJ_G0016920__Myct1	103.444	-1.45464	0.349947	-4.15673	3.22837e-05	0.00104635
MGP_BALBcJ_G0026805__Wisp2	1966.03	2.13099	0.512647	4.15683	3.22689e-05	0.00104635
MGP_BALBcJ_G0022859__Tmem45a	91.0095	1.46033	0.351367	4.15613	3.23682e-05	0.00104695
MGP_BALBcJ_G0018146__NA	806.364	-0.756192	0.182152	-4.15143	3.30404e-05	0.00106651
MGP_BALBcJ_G0005113__4732465J04Rik	13.589	4.70878	1.13508	4.14843	3.34765e-05	0.00107839
MGP_BALBcJ_G0031774__Tomm40	720.003	0.548609	0.132304	4.14657	3.375e-05	0.001085
MGP_BALBcJ_G0034055__Smpd3	25.0728	-2.1603	0.521113	-4.14554	3.39012e-05	0.00108765
MGP_BALBcJ_G0020700__Clptm1l	3718.54	0.295703	0.0713582	4.14392	3.41416e-05	0.00109315
MGP_BALBcJ_G0033679__Cope	2407.48	0.280631	0.0677374	4.14292	3.42905e-05	0.00109571
MGP_BALBcJ_G0020970__Nr1d2	1501.87	-0.94447	0.228157	-4.13956	3.4797e-05	0.00110965
MGP_BALBcJ_G0018794__Ccl6	1579.28	1.40027	0.338439	4.13743	3.51213e-05	0.00111551
MGP_BALBcJ_G0021826__Has2	128.661	2.5404	0.613975	4.13762	3.50921e-05	0.00111551
MGP_BALBcJ_G0031910__Zfp974	273.371	-0.510061	0.123306	-4.13655	3.52562e-05	0.00111755
MGP_BALBcJ_G0029137__Errfi1	4089.52	1.43263	0.346407	4.13567	3.53925e-05	0.00111963
MGP_BALBcJ_G0031329__Gabarapl1	3779.7	-0.410963	0.0993954	-4.13463	3.55525e-05	0.00112103
MGP_BALBcJ_G0032307__Herc2	3587.44	-0.281074	0.0679832	-4.13447	3.55782e-05	0.00112103
MGP_BALBcJ_G0020969__Thrb	527.033	-0.554157	0.134122	-4.13173	3.6005e-05	0.00113223
MGP_BALBcJ_G0018099__Rars	2025.83	0.365402	0.0884636	4.13054	3.61917e-05	0.00113585
MGP_BALBcJ_G0019089__Krt17	877.627	1.43901	0.348469	4.12952	3.63524e-05	0.00113863
MGP_BALBcJ_G0031760__NA	95.1049	1.16613	0.282484	4.12812	3.65746e-05	0.00114334
MGP_BALBcJ_G0015030__Gm15832	220.259	0.718055	0.173991	4.12696	3.67589e-05	0.00114683
MGP_BALBcJ_G0033796__Gab1	1679.61	-0.463328	0.112456	-4.1201	3.7871e-05	0.0011769
MGP_BALBcJ_G0034239__Abcb10	527.79	-0.396191	0.0961565	-4.12027	3.78431e-05	0.0011769
MGP_BALBcJ_G0034205__Aprt	600.28	0.624891	0.151687	4.1196	3.79532e-05	0.00117714
MGP_BALBcJ_G0015121__Mir22hg	781.129	0.735464	0.178629	4.11727	3.83394e-05	0.0011868
MGP_BALBcJ_G0025837__Osbpl6	58.5822	-1.27349	0.309412	-4.11584	3.8577e-05	0.00119182
MGP_BALBcJ_G0029829__Pigg	547.622	-0.409869	0.0995951	-4.11535	3.86586e-05	0.00119202
MGP_BALBcJ_G0029704__Pf4	246.256	1.24947	0.303688	4.11434	3.88288e-05	0.00119495
MGP_BALBcJ_G0026859__Mmp9	126.618	1.96865	0.478654	4.11289	3.90745e-05	0.00120018
MGP_BALBcJ_G0031782__Pvr	807.804	0.77522	0.188626	4.10983	3.95958e-05	0.00121276
MGP_BALBcJ_G0034651__Arhgef12	3983.29	-0.304234	0.0740304	-4.10959	3.96371e-05	0.00121276
MGP_BALBcJ_G0017238__Srgn	1224.86	2.50608	0.610033	4.1081	3.98925e-05	0.00121588
MGP_BALBcJ_G0018817__Car4	212.96	1.29412	0.315007	4.10824	3.98688e-05	0.00121588
MGP_BALBcJ_G0034395__Col5a3	1389.95	1.2968	0.315751	4.10702	4.00794e-05	0.00121923
MGP_BALBcJ_G0019213__Arf2	697.39	0.519562	0.126534	4.1061	4.02402e-05	0.00122049
MGP_BALBcJ_G0033537__Mtus1	3435.45	-0.428064	0.104256	-4.1059	4.02748e-05	0.00122049
MGP_BALBcJ_G0025117__R3hcc1l	1092.23	-0.412927	0.100582	-4.10538	4.03644e-05	0.00122087
MGP_BALBcJ_G0030056__Hcar2	380.551	3.53934	0.862641	4.10291	4.07992e-05	0.00123167
MGP_BALBcJ_G0027617__Pde4dip	1407.25	-0.337703	0.0823406	-4.10129	4.10845e-05	0.00123792
MGP_BALBcJ_G0019819__Rdh12	40.1628	2.57268	0.627358	4.10081	4.11699e-05	0.00123814
MGP_BALBcJ_G0029626__Ppat	222.982	0.677273	0.165182	4.10016	4.12864e-05	0.0012393
MGP_BALBcJ_G0033494__Nrg1	36.6505	1.91538	0.467441	4.0976	4.17458e-05	0.00125072
MGP_BALBcJ_G0020225__Zkscan8	1247.98	-0.335696	0.0819373	-4.09698	4.18574e-05	0.00125169
MGP_BALBcJ_G0031885__Snrpa	945.349	0.34634	0.0845988	4.09391	4.24165e-05	0.00126602
MGP_BALBcJ_G0019653__Pnpla8	3270.56	-0.411372	0.100498	-4.09334	4.25211e-05	0.00126676
MGP_BALBcJ_G0021616__Abcc4	197.474	0.902457	0.220665	4.08971	4.3192e-05	0.00128433
MGP_BALBcJ_G0022491__Snx29	446.6	-0.645899	0.158111	-4.08509	4.40603e-05	0.0013077
MGP_BALBcJ_G0029705__Cxcl3	55.395	5.62903	1.37828	4.08409	4.4249e-05	0.00131085
MGP_BALBcJ_G0016519__Prg4	110.691	2.06796	0.506488	4.08294	4.44686e-05	0.00131489
MGP_BALBcJ_G0021456__Ephx2	799.976	-1.0622	0.260206	-4.08213	4.46253e-05	0.00131707
MGP_BALBcJ_G0017128__Scml4	602.796	-0.676704	0.165902	-4.07893	4.5244e-05	0.00133283
MGP_BALBcJ_G0030235__Zkscan1	1931.7	-0.273614	0.0670898	-4.07832	4.5363e-05	0.00133283
MGP_BALBcJ_G0033952__Adgrg3	153.15	0.97174	0.238285	4.07807	4.54116e-05	0.00133283
MGP_BALBcJ_G0027171__Setd7	5477.13	-0.673884	0.165268	-4.07752	4.55189e-05	0.00133351
MGP_BALBcJ_G0016025__Gpr1	57.1114	-1.07331	0.263278	-4.0767	4.568e-05	0.00133576
MGP_BALBcJ_G0017488__Tjp3	1962.61	-0.522124	0.128144	-4.07451	4.61114e-05	0.00134589
MGP_BALBcJ_G0023796__Rpl7l1	1337.36	0.457026	0.112388	4.0665	4.77241e-05	0.0013904
MGP_BALBcJ_G0020719__Zfp72	105.038	-0.739886	0.181998	-4.06534	4.79621e-05	0.00139477
MGP_BALBcJ_G0005976__1700020I14Rik	4788.24	-0.320341	0.0788319	-4.0636	4.83214e-05	0.00140008
MGP_BALBcJ_G0035008__Myo5c	3027.99	-0.743369	0.182921	-4.06389	4.82622e-05	0.00140008
MGP_BALBcJ_G0017593__Hal	433.827	1.65396	0.407175	4.06203	4.86483e-05	0.00140698
MGP_BALBcJ_G0023249__Prss22	14.8827	2.66684	0.656807	4.06032	4.90058e-05	0.00141474
MGP_BALBcJ_G0021629__Dock9	3511.73	-0.273982	0.0676025	-4.05284	5.06007e-05	0.00145022
MGP_BALBcJ_G0024097__Mpp7	662.186	-0.449293	0.110857	-4.0529	5.05875e-05	0.00145022
MGP_BALBcJ_G0031897__Sertad1	404.784	0.785141	0.193692	4.05355	5.04467e-05	0.00145022
MGP_BALBcJ_G0035238__Gnai2	7642.95	0.339339	0.0837164	4.05343	5.04715e-05	0.00145022
MGP_BALBcJ_G0024972__Tmem252	227.745	1.35047	0.333358	4.0511	5.09769e-05	0.00145836
MGP_BALBcJ_G0020880__Plk2	713.397	0.796836	0.196825	4.04846	5.15565e-05	0.00147229
MGP_BALBcJ_G0031546__NA	778.664	0.423015	0.104531	4.04678	5.19269e-05	0.0014802
MGP_BALBcJ_G0020134__Asb13	1026.89	-0.464615	0.114839	-4.04578	5.21488e-05	0.00148315
MGP_BALBcJ_G0031071__Chl1	100.391	2.27552	0.562486	4.04547	5.22177e-05	0.00148315
MGP_BALBcJ_G0019495__Metrnl	295.902	0.900501	0.222756	4.04254	5.28747e-05	0.00149913
MGP_BALBcJ_G0027933__Ddah1	115.976	1.28424	0.317724	4.042	5.2998e-05	0.00149994
MGP_BALBcJ_G0025174__Nfkb2	1239.38	0.775448	0.19202	4.03837	5.3824e-05	0.0015206
MGP_BALBcJ_G0021522__Itm2b	36355	-0.58777	0.145586	-4.03728	5.40752e-05	0.00152498
MGP_BALBcJ_G0029316__Atg9b	46.5531	1.7753	0.439977	4.03498	5.46061e-05	0.00153721
MGP_BALBcJ_G0020670__Zfp729b	415.879	-0.467737	0.115967	-4.03336	5.49857e-05	0.00154516
MGP_BALBcJ_G0025706__Cacnb4	107.725	-1.42526	0.353626	-4.0304	5.56821e-05	0.00156196
MGP_BALBcJ_G0022043__Kdelr3	264.413	0.757353	0.188082	4.02672	5.65602e-05	0.00158378
MGP_BALBcJ_G0032226__Rasip1	414.129	0.804494	0.199831	4.02587	5.6765e-05	0.00158672
MGP_BALBcJ_G0018393__Ncor1	6060.02	-0.343051	0.0852474	-4.02418	5.71733e-05	0.00159532
MGP_BALBcJ_G0034079__Dhx38	1788.89	0.350702	0.0871808	4.02269	5.75363e-05	0.00160262
MGP_BALBcJ_G0018580__Mybbp1a	2423.41	0.667691	0.166003	4.02216	5.7668e-05	0.00160347
MGP_BALBcJ_G0031405__Atf7ip	2940.35	-0.381525	0.0948901	-4.0207	5.80257e-05	0.00161059
MGP_BALBcJ_G0025529__Slc39a1	2505.27	0.349191	0.086865	4.01992	5.82176e-05	0.0016131
MGP_BALBcJ_G0024410__Lmnb1	508.064	1.50508	0.374564	4.01822	5.86389e-05	0.00162193
MGP_BALBcJ_G0019823__Actn1	3147.66	0.847856	0.211194	4.01458	5.95518e-05	0.00164431
MGP_BALBcJ_G0024519__Mapk4	613.023	-1.01413	0.252675	-4.01356	5.98104e-05	0.00164858
MGP_BALBcJ_G0021875__Wisp1	35.2867	1.26146	0.314332	4.01314	5.99164e-05	0.00164864
MGP_BALBcJ_G0033775__Nr3c2	184.066	-1.03445	0.257808	-4.01247	6.00856e-05	0.00165043
MGP_BALBcJ_G0024573__Cndp2	1338.42	0.630767	0.157292	4.01017	6.06741e-05	0.00166084
MGP_BALBcJ_G0035345__Ccrl2	330.31	2.54485	0.634588	4.01024	6.06569e-05	0.00166084
MGP_BALBcJ_G0019453__P4hb	20246.7	0.511931	0.127709	4.00856	6.10901e-05	0.00166934
MGP_BALBcJ_G0021279__Psmb5	1296.46	0.319291	0.079694	4.00646	6.1636e-05	0.00168136
MGP_BALBcJ_G0034044__Slc12a4	450.72	0.631658	0.157728	4.00472	6.2092e-05	0.00169089
MGP_BALBcJ_G0029988__Oas2	443.298	0.639746	0.159861	4.00188	6.28402e-05	0.00170743
MGP_BALBcJ_G0031752__Ercc1	536.44	0.839186	0.209734	4.0012	6.30229e-05	0.00170743
MGP_BALBcJ_G0032219__Ppp1r15a	741.145	0.891233	0.222724	4.00151	6.29401e-05	0.00170743
MGP_BALBcJ_G0028330__Slc31a1	2902.31	-0.328741	0.0822317	-3.99774	6.39512e-05	0.00172963
MGP_BALBcJ_G0026804__Ada	191.276	0.970026	0.242729	3.99633	6.43321e-05	0.00173401
MGP_BALBcJ_G0033590__Spcs3	2541.58	0.485766	0.12155	3.99643	6.43059e-05	0.00173401
MGP_BALBcJ_G0035932__Ogt	11251.8	-0.346095	0.086658	-3.9938	6.50224e-05	0.00174964
MGP_BALBcJ_G0035968__Atrx	5886.59	-0.392215	0.0982238	-3.99307	6.52221e-05	0.00175204
MGP_BALBcJ_G0022753__Stfa2l1	13.4221	5.32536	1.3343	3.99112	6.5762e-05	0.00176356
MGP_BALBcJ_G0017534__Ckap4	510.591	1.31942	0.330706	3.9897	6.61557e-05	0.00177112
MGP_BALBcJ_G0027087__Tnik	1910.98	-0.455507	0.11422	-3.98799	6.66362e-05	0.00178097
MGP_BALBcJ_G0022810__Cd200r4	17.1307	2.68508	0.674402	3.98142	6.85053e-05	0.00182171
MGP_BALBcJ_G0024760__Atl3	5661.63	-0.358625	0.090066	-3.98181	6.83928e-05	0.00182171
MGP_BALBcJ_G0026608__Pygb	2444.68	-0.650651	0.163421	-3.98144	6.84987e-05	0.00182171
MGP_BALBcJ_G0029260__Steap4	2624.44	1.03954	0.261178	3.9802	6.88576e-05	0.00182801
MGP_BALBcJ_G0028216__Polr1e	196.148	0.670934	0.168613	3.97913	6.91669e-05	0.00183051
MGP_BALBcJ_G0031768__Relb	524.33	1.01163	0.254238	3.97908	6.91826e-05	0.00183051
MGP_BALBcJ_G0019898__Fos	1940.15	1.36579	0.343469	3.97644	6.99536e-05	0.00184783
MGP_BALBcJ_G0035993__Gm6377	36.8748	2.45751	0.618217	3.97516	7.03311e-05	0.0018547
MGP_BALBcJ_G0025886__Rtn4rl2	25.7031	2.16573	0.545273	3.97183	7.13236e-05	0.00187775
MGP_BALBcJ_G0018589__Camkk1	74.8171	0.841224	0.21193	3.96935	7.20679e-05	0.0018942
MGP_BALBcJ_G0021478__Stc1	151.29	0.992602	0.250191	3.96737	7.26697e-05	0.00190648
MGP_BALBcJ_G0029157__Gpr153	352.976	0.769186	0.193895	3.96702	7.27757e-05	0.00190648
MGP_BALBcJ_G0019805__Fut8	1809.58	-0.529548	0.133522	-3.96599	7.30916e-05	0.0019081
MGP_BALBcJ_G0020051__Wars	1135.05	0.344028	0.0867477	3.96585	7.31353e-05	0.0019081
MGP_BALBcJ_G0028995__Minos1	949.257	0.326714	0.0823863	3.96564	7.31988e-05	0.0019081
MGP_BALBcJ_G0029229__Isg15	147.496	0.961973	0.242632	3.96474	7.34745e-05	0.00191215
MGP_BALBcJ_G0020522__Nop16	475.191	0.619217	0.156385	3.95956	7.50883e-05	0.00195094
MGP_BALBcJ_G0030728__Hoxa9	50.5035	-1.45035	0.366624	-3.95595	7.62304e-05	0.00197737
MGP_BALBcJ_G0027953__Adgrl4	764.099	-0.611094	0.154524	-3.95469	7.66349e-05	0.00198462
MGP_BALBcJ_G0025480__Slc2a6	70.1484	1.93041	0.488204	3.9541	7.68219e-05	0.00198622
MGP_BALBcJ_G0023358__Arhgdig	16.084	2.74364	0.694161	3.95245	7.73541e-05	0.00199672
MGP_BALBcJ_G0019479__Sectm1a	2115.09	2.02474	0.512558	3.95026	7.80662e-05	0.00201182
MGP_BALBcJ_G0024060__Mcfd2	3708.18	0.369509	0.0935569	3.94956	7.82939e-05	0.00201442
MGP_BALBcJ_G0019107__Kat2a	1013.75	0.502193	0.127222	3.94739	7.90094e-05	0.00202953
MGP_BALBcJ_G0022064__Atf4	4697.7	0.476176	0.120689	3.94549	7.96379e-05	0.00204236
MGP_BALBcJ_G0018318__Gm12258	265.208	-0.599081	0.152037	-3.94037	8.13551e-05	0.00207967
MGP_BALBcJ_G0033851__Farsa	879.092	0.384283	0.0975245	3.94037	8.13544e-05	0.00207967
MGP_BALBcJ_G0020586__NA	360.048	1.00976	0.256571	3.93561	8.29872e-05	0.00211798
MGP_BALBcJ_G0033678__Ddx49	661.659	0.360884	0.0917216	3.93456	8.33484e-05	0.00212378
MGP_BALBcJ_G0024235__Ecscr	295.887	1.08375	0.275518	3.93351	8.37135e-05	0.00212811
MGP_BALBcJ_G0033284__Arhgef18	2250.07	-0.377057	0.0958627	-3.9333	8.3787e-05	0.00212811
MGP_BALBcJ_G0031811__Kcnn4	809.354	-0.655436	0.166799	-3.92948	8.51281e-05	0.00215871
MGP_BALBcJ_G0021971__Kifc2	316.499	-0.552695	0.140681	-3.92871	8.54012e-05	0.00216
MGP_BALBcJ_G0035635__Cul4b	1745.42	-0.359961	0.0916264	-3.92857	8.54514e-05	0.00216
MGP_BALBcJ_G0028137__Cntfr	237.047	1.33411	0.33963	3.92813	8.56104e-05	0.00216057
MGP_BALBcJ_G0019290__Sox9	3150.25	0.482931	0.123003	3.92616	8.63127e-05	0.00217297
MGP_BALBcJ_G0029989__Oas3	86.7033	1.86779	0.475751	3.92598	8.63758e-05	0.00217297
MGP_BALBcJ_G0019136__Psme3	2006.37	0.331874	0.0846051	3.92263	8.75881e-05	0.00219649
MGP_BALBcJ_G0027608__Gja5	95.6075	0.852904	0.217418	3.92288	8.74965e-05	0.00219649
MGP_BALBcJ_G0033302__Cd209e	15.6866	2.13567	0.544549	3.92191	8.78505e-05	0.00219959
MGP_BALBcJ_G0017421__Sbno2	6361.1	0.512959	0.130873	3.91953	8.87223e-05	0.00221442
MGP_BALBcJ_G0027932__Cyr61	937.239	1.98146	0.505516	3.91968	8.86658e-05	0.00221442
MGP_BALBcJ_G0022246__Vdr	11215.4	-0.494012	0.126095	-3.91776	8.93743e-05	0.00222719
MGP_BALBcJ_G0034820__Pstpip1	117.903	1.65062	0.421383	3.91714	8.96047e-05	0.00222943
MGP_BALBcJ_G0023585__Csnk2b	2605.04	0.302376	0.0772117	3.9162	8.99562e-05	0.00223466
MGP_BALBcJ_G0007373__Gm22	51.3227	2.63726	0.673564	3.91539	9.02594e-05	0.00223869
MGP_BALBcJ_G0023735__Adgrf5	2987.59	-0.439455	0.112501	-3.90624	9.37421e-05	0.00232143
MGP_BALBcJ_G0018390__Adora2b	39.6399	2.1157	0.542589	3.89926	9.64861e-05	0.00238566
MGP_BALBcJ_G0015738__G530011O06Rik	69.8425	1.74624	0.448193	3.89619	9.77174e-05	0.00241234
MGP_BALBcJ_G0033729__Plvap	1008.49	0.834528	0.214299	3.89422	9.85161e-05	0.00242828
MGP_BALBcJ_G0016622__F5	658.845	0.813956	0.20921	3.89062	9.99882e-05	0.00246073
MGP_BALBcJ_G0016164__Pid1	197.705	1.49194	0.383583	3.88949	0.000100457	0.00246844
MGP_BALBcJ_G0026124__Arhgap1	2213.87	0.289098	0.0743403	3.88884	0.000100723	0.00247116
MGP_BALBcJ_G0034404__Icam1	739.403	1.19569	0.307576	3.88747	0.000101295	0.00248132
MGP_BALBcJ_G0034854__Sema7a	738.544	1.31391	0.338202	3.88498	0.00010234	0.00250306
MGP_BALBcJ_G0028787__Phc2	2480.18	0.522369	0.134498	3.88384	0.00010282	0.00251094
MGP_BALBcJ_G0034429__Ldlr	311.398	0.986053	0.253968	3.88258	0.000103354	0.00252008
MGP_BALBcJ_G0020186__Arid4b	2069.51	-0.329474	0.084902	-3.88064	0.000104184	0.00253642
MGP_BALBcJ_G0031090__Srgap3	2176.77	-0.604719	0.155877	-3.87945	0.000104692	0.00254487
MGP_BALBcJ_G0010136__NA	48.8194	-2.28199	0.588552	-3.8773	0.000105621	0.00255962
MGP_BALBcJ_G0018210__Nhp2	670.941	0.578794	0.149269	3.87753	0.000105523	0.00255962
MGP_BALBcJ_G0030755__Adcyap1r1	301.563	0.881959	0.227553	3.87584	0.000106256	0.00257108
MGP_BALBcJ_G0016387__Il24	9.87403	3.51434	0.907411	3.87293	0.000107533	0.00259741
MGP_BALBcJ_G0020572__Tgfbi	2078.86	2.20626	0.569762	3.87225	0.000107836	0.00259741
MGP_BALBcJ_G0032943__Chp2	221.947	-1.27396	0.328967	-3.87261	0.000107675	0.00259741
MGP_BALBcJ_G0000096__Igkv1-132	17.1142	5.62917	1.45465	3.86977	0.000108938	0.00261672
MGP_BALBcJ_G0028383__Ttc39b	469.332	0.89039	0.230092	3.8697	0.000108968	0.00261672
MGP_BALBcJ_G0031511__Mboat7	1198.07	0.310138	0.0802381	3.86522	0.000110988	0.00266119
MGP_BALBcJ_G0022334__Nr4a1	306.615	1.87169	0.484348	3.86436	0.000111383	0.00266467
MGP_BALBcJ_G0029859__Pgam5	690.189	0.380192	0.098389	3.86417	0.000111469	0.00266467
MGP_BALBcJ_G0019814__Plekhh1	405.556	1.18508	0.307118	3.8587	0.000113992	0.0027127
MGP_BALBcJ_G0025604__Garnl3	888.007	-0.789926	0.204689	-3.85914	0.000113786	0.0027127
MGP_BALBcJ_G0029015__Padi2	46.9415	1.14218	0.295987	3.85888	0.000113906	0.0027127
MGP_BALBcJ_G0015943__Myo1b	668.675	0.648494	0.168286	3.85352	0.000116431	0.00276658
MGP_BALBcJ_G0025581__Slc25a25	328.703	0.947595	0.245978	3.85236	0.000116986	0.00277562
MGP_BALBcJ_G0029591__Nipal1	25.3258	2.10585	0.546923	3.85036	0.000117944	0.00278999
MGP_BALBcJ_G0031194__Tuba8	202.176	0.878323	0.228097	3.85066	0.0001178	0.00278999
MGP_BALBcJ_G0029552__Klb	166.73	-1.26353	0.328418	-3.84732	0.000119416	0.00281641
MGP_BALBcJ_G0034256__Egln1	1243.7	-0.322933	0.0839338	-3.84747	0.000119342	0.00281641
MGP_BALBcJ_G0026287__Gpr176	46.162	1.46177	0.380163	3.84513	0.00012049	0.00283481
MGP_BALBcJ_G0027845__Gar1	361.536	0.752743	0.19579	3.84463	0.000120733	0.00283481
MGP_BALBcJ_G0031191__Bid	492.939	0.702753	0.182771	3.84499	0.000120558	0.00283481
MGP_BALBcJ_G0021765__Ywhaz	6015.39	0.300706	0.0782267	3.84404	0.000121027	0.00283751
MGP_BALBcJ_G0020664__NA	63.9032	-1.02996	0.268039	-3.84256	0.000121757	0.00285042
MGP_BALBcJ_G0029357__Il6	26.8964	4.08952	1.06593	3.83657	0.000124765	0.00291653
MGP_BALBcJ_G0022435__Vasn	425.796	0.672658	0.175442	3.83408	0.000126034	0.00294185
MGP_BALBcJ_G0025366__Pdss1	94.0525	0.712513	0.185895	3.83287	0.000126654	0.00295198
MGP_BALBcJ_G0017981__Upp1	125.094	1.34476	0.350907	3.83224	0.00012698	0.00295522
MGP_BALBcJ_G0022660__Cldn1	885.206	0.791296	0.206523	3.83152	0.000127353	0.00295956
MGP_BALBcJ_G0034107__Aars	3159.09	0.328792	0.0858566	3.82955	0.00012838	0.00297905
MGP_BALBcJ_G0035393__Myd88	1642.15	0.587913	0.153562	3.82852	0.000128918	0.00298717
MGP_BALBcJ_G0018262__Tnip1	738.623	0.669774	0.1751	3.82509	0.000130722	0.00302187
MGP_BALBcJ_G0029752__Bmp3	353.997	-0.98776	0.258241	-3.82495	0.000130797	0.00302187
MGP_BALBcJ_G0020414__F13a1	2022.8	1.2181	0.319162	3.81656	0.000135326	0.00311387
MGP_BALBcJ_G0026850__Acot8	422.536	0.426747	0.111804	3.81693	0.000135124	0.00311387
MGP_BALBcJ_G0034110__Glg1	5793.7	-0.27898	0.0730987	-3.81648	0.000135368	0.00311387
MGP_BALBcJ_G0019367__Foxj1	93.7115	1.67382	0.438765	3.81485	0.000136265	0.00312913
MGP_BALBcJ_G0034686__Ddx6	5473.84	-0.241	0.063179	-3.81456	0.000136427	0.00312913
MGP_BALBcJ_G0028625__Btbd19	133.483	1.0441	0.273859	3.81256	0.000137536	0.00315002
MGP_BALBcJ_G0019002__NA	820.342	-0.757589	0.19874	-3.81195	0.000137872	0.00315316
MGP_BALBcJ_G0031418__Eps8	493.746	0.75664	0.198581	3.81024	0.00013883	0.00317048
MGP_BALBcJ_G0027765__Slc25a24	567.93	1.0683	0.280529	3.80815	0.000140012	0.00319289
MGP_BALBcJ_G0024742__Ppp1r14b	1513.61	0.413881	0.108706	3.80733	0.000140476	0.00319886
MGP_BALBcJ_G0028757__Map7d1	1949.02	0.461167	0.121184	3.80551	0.000141514	0.00321786
MGP_BALBcJ_G0023734__Adgrf1	590.677	-1.19609	0.314482	-3.80335	0.000142753	0.00324138
MGP_BALBcJ_G0033695__Gdf15	18.7003	2.2537	0.592965	3.80073	0.000144268	0.0032711
MGP_BALBcJ_G0032232__Dbp	172.419	-2.05688	0.54128	-3.80002	0.000144682	0.0032758
MGP_BALBcJ_G0034911__Map2k1	1503.89	0.336905	0.0886897	3.7987	0.000145458	0.00328867
MGP_BALBcJ_G0021082__Eaf1	1529.71	0.481125	0.126678	3.79803	0.000145851	0.00329287
MGP_BALBcJ_G0035222__Cish	1428.49	-0.551059	0.145135	-3.79689	0.000146525	0.00330338
MGP_BALBcJ_G0015924__Tex30	93.1729	0.793674	0.209126	3.7952	0.000147524	0.00332118
MGP_BALBcJ_G0030260__Pdgfa	517.957	1.06227	0.280051	3.79312	0.000148764	0.00334435
MGP_BALBcJ_G0024406__Gramd3	966.789	-0.405551	0.106929	-3.79271	0.000149013	0.00334519
MGP_BALBcJ_G0028496__Prkaa2	1344.89	-0.811042	0.214052	-3.789	0.000151255	0.00339012
MGP_BALBcJ_G0032336__Pcsk6	178.998	-0.928237	0.245002	-3.78869	0.000151442	0.00339012
MGP_BALBcJ_G0029568__Limch1	178.092	-1.00892	0.266325	-3.78831	0.000151674	0.00339052
MGP_BALBcJ_G0029501__Fbxl5	1254.73	0.993594	0.262407	3.78646	0.000152809	0.00341108
MGP_BALBcJ_G0011271__NA	831.855	0.388852	0.102734	3.78503	0.000153692	0.00342597
MGP_BALBcJ_G0029737__Ccng2	2089.33	-0.562548	0.148693	-3.78328	0.000154776	0.00344529
MGP_BALBcJ_G0016952__Stx11	93.2842	2.43036	0.642889	3.78037	0.000156594	0.00347263
MGP_BALBcJ_G0028293__Tmem245	1984.15	-0.366664	0.0969835	-3.78068	0.000156398	0.00347263
MGP_BALBcJ_G0031105__Il17re	996.902	-0.533304	0.141076	-3.78026	0.000156662	0.00347263
MGP_BALBcJ_G0018130__Nipal4	27.4168	2.14083	0.566671	3.7779	0.000158153	0.0035008
MGP_BALBcJ_G0026282__Spred1	1157.83	0.860857	0.227999	3.7757	0.000159557	0.00352694
MGP_BALBcJ_G0006574__AI839979	18.1803	3.11097	0.824509	3.77312	0.000161218	0.00355869
MGP_BALBcJ_G0016374__Cxcr4	300.56	2.56659	0.680439	3.77196	0.000161971	0.00357034
MGP_BALBcJ_G0017577__Gas2l3	178.688	1.03085	0.273351	3.77116	0.000162489	0.00357183
MGP_BALBcJ_G0029083__Vps13d	2347.53	-0.278819	0.0739338	-3.7712	0.000162465	0.00357183
MGP_BALBcJ_G0026894__Cebpb	963.831	0.732589	0.19429	3.77059	0.000162862	0.00357508
MGP_BALBcJ_G0025390__Pnpla7	4140.71	-0.445064	0.118149	-3.76697	0.000165244	0.00361885
MGP_BALBcJ_G0028566__Skint2	118.556	-1.31726	0.349697	-3.76686	0.000165313	0.00361885
MGP_BALBcJ_G0022053__Nptxr	66.1258	1.32911	0.352976	3.76545	0.000166246	0.00362926
MGP_BALBcJ_G0023738__Pla2g7	883.523	1.07006	0.284162	3.76566	0.000166107	0.00362926
MGP_BALBcJ_G0028085__Rragd	688.382	-0.911829	0.242256	-3.7639	0.000167283	0.00364686
MGP_BALBcJ_G0022627__Ehhadh	1874.92	-0.752514	0.200051	-3.7616	0.000168827	0.00366539
MGP_BALBcJ_G0028446__Cyp2j9	60.6691	-1.10783	0.294509	-3.76162	0.000168813	0.00366539
MGP_BALBcJ_G0031040__Adamts9	1256.9	1.1782	0.313161	3.76228	0.000168372	0.00366539
MGP_BALBcJ_G0017362__Cstb	2404.78	0.642333	0.170816	3.76039	0.00016965	0.00367822
MGP_BALBcJ_G0033491__Mak16	773.254	0.516007	0.137287	3.75859	0.000170873	0.00369969
MGP_BALBcJ_G0020834__Naip2	297.429	0.454444	0.120944	3.75748	0.000171636	0.00370468
MGP_BALBcJ_G0022372__Mfsd5	742.149	0.324911	0.0864761	3.75723	0.000171805	0.00370468
MGP_BALBcJ_G0023753__Nfkbie	310.472	1.34119	0.35691	3.75777	0.000171431	0.00370468
MGP_BALBcJ_G0017995__Plek	1198.72	2.74381	0.730687	3.75511	0.000173266	0.0037311
MGP_BALBcJ_G0032135__Klk6	15.2862	3.8975	1.03843	3.75325	0.000174554	0.00375373
MGP_BALBcJ_G0026492__4930402H24Rik	2861.62	-0.501371	0.133617	-3.75229	0.000175226	0.00376309
MGP_BALBcJ_G0023990__Birc6	4121.58	-0.318136	0.084806	-3.75134	0.000175895	0.00377234
MGP_BALBcJ_G0022141__Parvb	243.029	0.875441	0.233429	3.75035	0.000176589	0.00378211
MGP_BALBcJ_G0019813__Tmem229b	709.055	0.928483	0.247601	3.74991	0.000176898	0.00378361
MGP_BALBcJ_G0023428__Pim1	997.735	0.622452	0.166013	3.74942	0.000177245	0.00378592
MGP_BALBcJ_G0028733__Fhl3	64.5664	1.12051	0.299155	3.74558	0.000179978	0.00383912
MGP_BALBcJ_G0024654__Rin1	271.084	0.967484	0.258427	3.74374	0.000181299	0.00386069
MGP_BALBcJ_G0032747__Rrp8	471.611	0.473066	0.12637	3.7435	0.000181476	0.00386069
MGP_BALBcJ_G0003877__Gm11266	56.0184	-0.973102	0.25997	-3.74314	0.000181736	0.00386104
MGP_BALBcJ_G0028013__Gdf6	50.1295	2.6948	0.720037	3.74259	0.000182133	0.00386428
MGP_BALBcJ_G0030597__Clec5a	79.029	1.79126	0.478681	3.74208	0.000182506	0.00386704
MGP_BALBcJ_G0029013__Padi3	15.1788	1.93289	0.516657	3.74115	0.000183178	0.00387608
MGP_BALBcJ_G0017200__Ddit4	473.249	0.746276	0.19958	3.73924	0.000184578	0.0039005
MGP_BALBcJ_G0017173__Gja1	1553.83	1.07784	0.288472	3.73636	0.000186702	0.0039349
MGP_BALBcJ_G0017351__Trpm2	233.345	1.39642	0.37371	3.73665	0.000186491	0.0039349
MGP_BALBcJ_G0028482__Pde4b	3562.99	1.05155	0.281475	3.73587	0.00018707	0.00393741
MGP_BALBcJ_G0018780__Slfn1	71.2818	2.21343	0.592954	3.73288	0.000189301	0.00397382
MGP_BALBcJ_G0032739__Prkcdbp	256.972	0.830919	0.222584	3.73305	0.000189173	0.00397382
MGP_BALBcJ_G0016621__Selp	528.658	1.99927	0.535683	3.7322	0.000189817	0.00397938
MGP_BALBcJ_G0019306__Cd300lb	150.44	2.04357	0.54827	3.7273	0.000193541	0.00405208
MGP_BALBcJ_G0026720__Eif6	1472.71	0.543687	0.145974	3.72456	0.000195659	0.00409102
MGP_BALBcJ_G0015878__2010300C02Rik	631.479	-0.585885	0.157337	-3.72376	0.000196274	0.00409848
MGP_BALBcJ_G0026826__Sdc4	5699.2	0.65056	0.174791	3.72192	0.000197713	0.00412309
MGP_BALBcJ_G0018209__Hnrnpab	7768.52	0.292288	0.0786376	3.71689	0.000201688	0.00417265
MGP_BALBcJ_G0018509__Eif5a	3299.65	0.531935	0.143135	3.71632	0.000202142	0.00417265
MGP_BALBcJ_G0020457__Mylip	2677.66	-0.475613	0.12794	-3.71746	0.000201237	0.00417265
MGP_BALBcJ_G0021095__Ogdhl	20.1625	2.09257	0.562823	3.71799	0.000200815	0.00417265
MGP_BALBcJ_G0024182__Polr2d	270.462	0.561088	0.150907	3.7181	0.000200728	0.00417265
MGP_BALBcJ_G0024703__Syvn1	2373.97	0.522374	0.140561	3.71635	0.000202125	0.00417265
MGP_BALBcJ_G0026215__Fibin	270.386	0.858351	0.230972	3.71626	0.000202195	0.00417265
MGP_BALBcJ_G0032959__D430042O09Rik	1004.53	-0.308159	0.0829043	-3.71705	0.000201564	0.00417265
MGP_BALBcJ_G0021068__Gnl3	1017.49	0.855517	0.230274	3.71521	0.000203035	0.00418454
MGP_BALBcJ_G0019454__Arhgdia	8766.4	0.307321	0.0827762	3.71267	0.000205085	0.00422129
MGP_BALBcJ_G0024948__Anxa1	8539.31	0.84289	0.227087	3.71175	0.000205831	0.00423115
MGP_BALBcJ_G0029108__Srm	639.253	0.738224	0.198938	3.71083	0.000206581	0.00424107
MGP_BALBcJ_G0033502__Gsr	2150.61	0.437124	0.117854	3.70904	0.000208046	0.00426561
MGP_BALBcJ_G0018055__Sptbn1	9329.05	-0.242981	0.0655233	-3.70831	0.000208644	0.00427219
MGP_BALBcJ_G0028656__Ebna1bp2	891.12	0.445511	0.120149	3.708	0.000208906	0.00427219
MGP_BALBcJ_G0023782__Srf	1046.25	0.476817	0.128615	3.70733	0.000209457	0.00427795
MGP_BALBcJ_G0025332__Hacd1	222.754	0.68225	0.184143	3.705	0.00021139	0.00431186
MGP_BALBcJ_G0022087__Tef	1517.86	-1.42418	0.384446	-3.70449	0.000211818	0.00431504
MGP_BALBcJ_G0017766__Lrp1	7968.17	0.766791	0.207113	3.70229	0.000213664	0.00434707
MGP_BALBcJ_G0019425__Rnf213	5071.56	-0.235684	0.0636752	-3.70135	0.000214458	0.00435762
MGP_BALBcJ_G0018211__Rmnd5b	998.969	0.387506	0.10479	3.69792	0.000217377	0.00441128
MGP_BALBcJ_G0024471__Atp8b1	515.576	0.785788	0.212562	3.69675	0.000218376	0.00442588
MGP_BALBcJ_G0028726__Rhbdl2	28.5583	1.64895	0.446263	3.69501	0.000219877	0.00445062
MGP_BALBcJ_G0025674__Nek6	1191.65	0.74156	0.200737	3.69418	0.000220598	0.00445383
MGP_BALBcJ_G0034531__Ccdc15	38.5793	-1.16155	0.314426	-3.69421	0.000220576	0.00445383
MGP_BALBcJ_G0034458__Bbs9	586.977	-0.668954	0.181142	-3.69299	0.000221636	0.00446909
MGP_BALBcJ_G0017092__Traf3ip2	578.352	0.487943	0.132218	3.69046	0.000223852	0.00450804
MGP_BALBcJ_G0026424__Blvra	301.722	0.617474	0.167345	3.68984	0.000224396	0.00451327
MGP_BALBcJ_G0018522__Mgl2	253.218	1.10057	0.298399	3.68823	0.000225817	0.00453609
MGP_BALBcJ_G0019521__Atad2b	1561.89	-0.276911	0.0751126	-3.68661	0.000227259	0.00455352
MGP_BALBcJ_G0030161__Hip1	958.015	0.799697	0.216905	3.68685	0.000227044	0.00455352
MGP_BALBcJ_G0023401__Rpl10a	6569.51	0.343784	0.0932685	3.68596	0.000227841	0.00455941
MGP_BALBcJ_G0020908__Itga2	112.881	1.87074	0.507647	3.68511	0.000228604	0.00456891
MGP_BALBcJ_G0035892__Msn	4409.78	1.10023	0.298783	3.68237	0.000231072	0.00461241
MGP_BALBcJ_G0018076__Sh3pxd2b	2949.03	0.71317	0.193702	3.68179	0.0002316	0.00461713
MGP_BALBcJ_G0021222__Pnp	1597.59	0.446944	0.121415	3.68112	0.000232208	0.00461764
MGP_BALBcJ_G0024115__Cables1	273.312	-0.648945	0.176285	-3.68123	0.000232113	0.00461764
MGP_BALBcJ_G0018730__Lyrm9	334.004	-0.464519	0.126411	-3.67468	0.000238147	0.00472981
MGP_BALBcJ_G0026140__Chst1	193.82	-1.09611	0.298394	-3.67337	0.000239371	0.00474818
MGP_BALBcJ_G0021515__Dok2	233.36	1.46316	0.398567	3.67105	0.000241557	0.00478554
MGP_BALBcJ_G0024672__Fosl1	71.8758	2.86264	0.779969	3.6702	0.000242365	0.00479555
MGP_BALBcJ_G0034302__Birc3	1138.59	0.721103	0.196569	3.66845	0.000244027	0.00482242
MGP_BALBcJ_G0034011__E2f4	875.559	0.450797	0.122964	3.66608	0.000246294	0.00486117
MGP_BALBcJ_G0020423__Txndc5	4812.34	0.328722	0.0897656	3.662	0.000250254	0.00491355
MGP_BALBcJ_G0021628__Slc15a1	24.8898	-1.8086	0.493851	-3.66223	0.000250028	0.00491355
MGP_BALBcJ_G0024137__Dsc3	23.083	-4.71758	1.28834	-3.66175	0.000250498	0.00491355
MGP_BALBcJ_G0027101__Phc3	2688.94	-0.261376	0.0713758	-3.66197	0.000250287	0.00491355
MGP_BALBcJ_G0030449__Tes	2697.54	0.389599	0.106379	3.66237	0.000249895	0.00491355
MGP_BALBcJ_G0023824__NA	7.33677	6.30653	1.72368	3.65876	0.000253437	0.00496506
MGP_BALBcJ_G0033511__Dusp4	421.653	1.18249	0.323235	3.6583	0.000253894	0.00496786
MGP_BALBcJ_G0019827__NA	675.058	0.361627	0.0989072	3.65622	0.000255958	0.00500207
MGP_BALBcJ_G0020912__Parp8	279.794	0.560179	0.153239	3.65558	0.000256603	0.0050085
MGP_BALBcJ_G0030953__Pcyox1	5438.1	-0.479742	0.131358	-3.65217	0.000260031	0.00506917
MGP_BALBcJ_G0032385__Pex11a	1358.22	-0.487813	0.133609	-3.65104	0.000261181	0.00508534
MGP_BALBcJ_G0023828__Treml4	19.6364	2.82939	0.775713	3.64747	0.000264837	0.00515019
MGP_BALBcJ_G0029370__Slc35f6	1527.2	0.464938	0.127521	3.64596	0.000266391	0.00517406
MGP_BALBcJ_G0017099__Slc16a10	189.095	0.795651	0.218404	3.64302	0.000269461	0.00522276
MGP_BALBcJ_G0033188__Ifitm3	1927.3	0.852831	0.234106	3.64292	0.000269558	0.00522276
MGP_BALBcJ_G0029764__Plac8	234.959	1.46424	0.402137	3.64115	0.000271428	0.00525257
MGP_BALBcJ_G0018709__Proca1	94.7413	-0.837894	0.230197	-3.6399	0.000272741	0.00526481
MGP_BALBcJ_G0019569__Adam17	1852.27	0.523033	0.143701	3.63974	0.000272917	0.00526481
MGP_BALBcJ_G0030000__Gm15800	1395.61	-0.328906	0.0903685	-3.6396	0.000273057	0.00526481
MGP_BALBcJ_G0026920__Cass4	47.8425	2.29479	0.630563	3.63928	0.000273404	0.00526511
MGP_BALBcJ_G0016751__AI607873	682.217	0.935996	0.25728	3.63805	0.00027471	0.00528383
MGP_BALBcJ_G0022657__Tprg	8.15029	4.56915	1.25616	3.63741	0.000275398	0.00529064
MGP_BALBcJ_G0015744__Xkr4	95.4961	-1.39645	0.384018	-3.63641	0.000276461	0.00529987
MGP_BALBcJ_G0032333__Tjp1	4451.5	-0.304371	0.0837026	-3.63633	0.000276547	0.00529987
MGP_BALBcJ_G0018695__Myo18a	6436.9	0.464681	0.127969	3.63119	0.000282117	0.00540008
MGP_BALBcJ_G0016649__Gm4847	15.3498	4.3896	1.20952	3.6292	0.000284303	0.00543536
MGP_BALBcJ_G0022809__Cd200r1	90.9434	1.53018	0.421683	3.62873	0.000284815	0.0054386
MGP_BALBcJ_G0034943__Ppib	5235.82	0.33635	0.092706	3.62814	0.000285472	0.00544458
MGP_BALBcJ_G0031949__Lgals4	599.373	-0.533024	0.146953	-3.62716	0.000286552	0.00545861
MGP_BALBcJ_G0025292__Mcm10	54.8876	0.920522	0.253818	3.6267	0.000287066	0.00546184
MGP_BALBcJ_G0020117__Zfp386	1020.93	-0.492224	0.13582	-3.62408	0.000289987	0.00551079
MGP_BALBcJ_G0019825__Exd2	563.772	-0.320877	0.0885713	-3.62281	0.00029142	0.0055116
MGP_BALBcJ_G0021333__Ltb4r1	38.7125	1.79984	0.496692	3.62366	0.000290459	0.0055116
MGP_BALBcJ_G0022575__Arvcf	595.851	-0.582626	0.160813	-3.623	0.000291209	0.0055116
MGP_BALBcJ_G0034490__Barx2	404.06	-0.926708	0.255776	-3.62312	0.00029107	0.0055116
MGP_BALBcJ_G0028206__Glipr2	379.668	0.922149	0.254601	3.62194	0.000292403	0.00552359
MGP_BALBcJ_G0019150__Tmem106a	490.684	0.838977	0.231718	3.62068	0.00029383	0.00554394
MGP_BALBcJ_G0026169__Cd44	1835.2	2.71625	0.750493	3.61929	0.000295413	0.00556719
MGP_BALBcJ_G0016395__Ikbke	516.043	1.04502	0.288927	3.61691	0.000298142	0.00560318
MGP_BALBcJ_G0030746__NA	3874.33	-0.644433	0.178213	-3.61609	0.000299091	0.00560318
MGP_BALBcJ_G0033359__Tfdp1	1006.99	0.381199	0.105385	3.61721	0.000297795	0.00560318
MGP_BALBcJ_G0034068__Nip7	555.341	0.531563	0.14699	3.61632	0.000298826	0.00560318
MGP_BALBcJ_G0035825__F8	91.7716	-1.15431	0.319191	-3.61636	0.000298778	0.00560318
MGP_BALBcJ_G0020124__Cdca7l	201.84	-0.944653	0.261319	-3.61494	0.000300415	0.00561472
MGP_BALBcJ_G0030546__Tmem140	732.709	-0.644948	0.178397	-3.61524	0.000300075	0.00561472
MGP_BALBcJ_G0016951__Utrn	3639.62	-0.276288	0.07648	-3.61255	0.000303196	0.00565336
MGP_BALBcJ_G0031064__Prok2	8.0502	6.50911	1.8018	3.61256	0.000303189	0.00565336
MGP_BALBcJ_G0030737__Tril	225.148	-0.860634	0.238374	-3.61043	0.000305688	0.00569312
MGP_BALBcJ_G0030944__Nat8f4	268.759	-0.60727	0.168242	-3.6095	0.000306783	0.00570013
MGP_BALBcJ_G0034399__Ppan	473.282	0.736561	0.204046	3.60978	0.000306456	0.00570013
MGP_BALBcJ_G0027353__Gpatch4	333.778	0.757657	0.209978	3.60827	0.000308245	0.00572058
MGP_BALBcJ_G0021879__Khdrbs3	2363.69	0.592199	0.164162	3.60741	0.000309268	0.00572615
MGP_BALBcJ_G0036046__Gla	549.804	1.01714	0.281937	3.60768	0.000308943	0.00572615
MGP_BALBcJ_G0027902__Eif4e	1326.8	0.527744	0.146309	3.60704	0.000309704	0.00572754
MGP_BALBcJ_G0022854__Senp7	663.795	-0.385726	0.106973	-3.60582	0.000311168	0.00574791
MGP_BALBcJ_G0025617__Psmd5	1127.2	-0.3622	0.100497	-3.60408	0.00031326	0.00577982
MGP_BALBcJ_G0022632__Igf2bp2	92.3219	1.02355	0.284157	3.60206	0.000315706	0.00581817
MGP_BALBcJ_G0022235__Slc38a1	285.05	1.75995	0.488937	3.59955	0.000318771	0.00586671
MGP_BALBcJ_G0027871__Cxxc4	137.442	-1.04657	0.290772	-3.5993	0.00031908	0.00586671
MGP_BALBcJ_G0022675__Hes1	308.165	0.868433	0.241321	3.59866	0.000319862	0.00587426
MGP_BALBcJ_G0027030__Zfp704	3509.42	-0.507879	0.141167	-3.59771	0.000321032	0.00588893
MGP_BALBcJ_G0015844__Dst	10702.5	-0.321765	0.0894637	-3.5966	0.000322406	0.00590729
MGP_BALBcJ_G0023047__Ets2	3823.24	0.698094	0.194193	3.59485	0.000324574	0.00594015
MGP_BALBcJ_G0031103__Cidec	1895.64	-0.597216	0.166162	-3.59418	0.000325414	0.00594866
MGP_BALBcJ_G0023956__Zbtb14	534.317	-0.41651	0.115917	-3.59318	0.000326663	0.0059646
MGP_BALBcJ_G0035096__NA	536.011	0.784945	0.218627	3.59034	0.000330248	0.00602312
MGP_BALBcJ_G0017896__Pik3ip1	697.513	-0.925682	0.25809	-3.58666	0.000334945	0.00610178
MGP_BALBcJ_G0028065__Fbxl4	695.432	-0.445817	0.124309	-3.58635	0.000335333	0.00610182
MGP_BALBcJ_G0029723__Sdad1	676.258	0.530056	0.147852	3.58504	0.00033703	0.00612567
MGP_BALBcJ_G0030101__Adgrd1	388.957	0.744285	0.207651	3.58431	0.000337975	0.00613581
MGP_BALBcJ_G0030500__Hilpda	492.452	1.22773	0.342674	3.5828	0.000339934	0.00616255
MGP_BALBcJ_G0032003__Nfkbid	122.757	1.57279	0.43901	3.58257	0.000340226	0.00616255
MGP_BALBcJ_G0033755__Klf2	188.148	1.07323	0.299846	3.57928	0.000344541	0.00623359
MGP_BALBcJ_G0029135__Rere	5211.35	-0.527755	0.147509	-3.57778	0.000346531	0.00626246
MGP_BALBcJ_G0024690__Ehbp1l1	1180.72	0.695327	0.194403	3.57674	0.000347908	0.00628017
MGP_BALBcJ_G0004452__Gm15635	47.1517	-1.83797	0.514099	-3.57513	0.000350059	0.0062981
MGP_BALBcJ_G0029410__Fosl2	3466.82	0.788224	0.220447	3.57558	0.000349452	0.0062981
MGP_BALBcJ_G0035656__Xpnpep2	38.5983	1.52747	0.427251	3.5751	0.000350093	0.0062981
MGP_BALBcJ_G0028125__Nol6	1103.77	0.401946	0.112446	3.57457	0.000350805	0.00630376
MGP_BALBcJ_G0023846__Satb1	628.103	-0.533873	0.149417	-3.57305	0.000352843	0.00633319
MGP_BALBcJ_G0015336__Gm20539	26.2926	-1.48866	0.416734	-3.57219	0.000354002	0.0063468
MGP_BALBcJ_G0025714__Nr4a2	65.8253	1.19487	0.334538	3.57169	0.000354686	0.00634933
MGP_BALBcJ_G0030285__Eif3b	4216.53	0.350301	0.0980824	3.5715	0.000354944	0.00634933
MGP_BALBcJ_G0021007__Samd8	1143.11	0.428983	0.120191	3.56916	0.000358125	0.00639902
MGP_BALBcJ_G0025330__Vim	5009.98	0.739846	0.207359	3.56794	0.000359793	0.00642158
MGP_BALBcJ_G0016274__Sned1	1135.65	0.760169	0.213109	3.56705	0.000361028	0.00642913
MGP_BALBcJ_G0022058__Pdgfb	729.712	0.84431	0.236694	3.56709	0.000360964	0.00642913
MGP_BALBcJ_G0020942__Fam107a	41.9592	2.33289	0.654814	3.56267	0.000367099	0.00652991
MGP_BALBcJ_G0019788__Syne2	2943.28	-0.481186	0.135183	-3.55952	0.000371539	0.00660148
MGP_BALBcJ_G0033429__Slc20a2	1534.2	0.4698	0.132023	3.55846	0.000373041	0.00662075
MGP_BALBcJ_G0032870__Pde3b	448.196	-0.57502	0.161678	-3.55658	0.00037572	0.00665339
MGP_BALBcJ_G0033442__Sfrp1	3265.36	-0.514	0.144515	-3.55672	0.000375514	0.00665339
MGP_BALBcJ_G0019883__Ltbp2	399.655	0.99661	0.28024	3.55627	0.000376153	0.00665362
MGP_BALBcJ_G0019437__NA	9483.84	0.474401	0.133546	3.55233	0.000381842	0.00673922
MGP_BALBcJ_G0028900__Zfp593	175.799	0.575921	0.16212	3.55243	0.000381695	0.00673922
MGP_BALBcJ_G0022361__Krt8	13783.8	0.708298	0.199415	3.55187	0.000382501	0.00674333
MGP_BALBcJ_G0030256__Zfp68	898.456	-0.369071	0.103953	-3.55037	0.000384683	0.00677426
MGP_BALBcJ_G0016307__2310035C23Rik	1531.67	-0.36819	0.103739	-3.54919	0.000386423	0.00678981
MGP_BALBcJ_G0021749__Pop1	143.652	0.703641	0.198245	3.54936	0.000386175	0.00678981
MGP_BALBcJ_G0024967__Fam189a2	1917.26	-0.41288	0.116385	-3.54754	0.000388851	0.00682492
MGP_BALBcJ_G0021335__Ripk3	162.57	0.907646	0.255884	3.5471	0.000389499	0.00682874
MGP_BALBcJ_G0032879__Pik3c2a	2828.11	-0.562355	0.158553	-3.54681	0.000389932	0.00682877
MGP_BALBcJ_G0035204__Abhd14b	1042.95	-0.500443	0.141128	-3.54603	0.000391087	0.00684144
MGP_BALBcJ_G0018486__Eif4a1	13753.2	0.456523	0.12877	3.54525	0.000392235	0.00685341
MGP_BALBcJ_G0032570__NA	1059.27	-0.517587	0.146006	-3.54498	0.000392637	0.00685341
MGP_BALBcJ_G0019893__Mlh3	501.017	-0.503227	0.142006	-3.54369	0.000394562	0.0068724
MGP_BALBcJ_G0026565__Sec23b	1917.07	0.383889	0.108331	3.54367	0.000394592	0.0068724
MGP_BALBcJ_G0034947__Dapk2	148.203	-0.721479	0.20369	-3.54205	0.00039703	0.00690728
MGP_BALBcJ_G0007133__Gm37494	1455.83	-0.526636	0.148729	-3.54091	0.000398743	0.00692948
MGP_BALBcJ_G0034540__Siae	472.42	-0.52086	0.14711	-3.54062	0.000399189	0.00692963
MGP_BALBcJ_G0026493__Atrn	4284.83	-0.514648	0.145411	-3.53926	0.000401249	0.00695776
MGP_BALBcJ_G0022868__Dcbld2	448.504	0.439249	0.124167	3.53758	0.000403819	0.00699467
MGP_BALBcJ_G0016914__Rmnd1	424.348	-0.380702	0.107677	-3.53558	0.000406878	0.00703997
MGP_BALBcJ_G0027376__Ssr2	3499.93	0.420205	0.118898	3.53418	0.000409049	0.00706981
MGP_BALBcJ_G0019258__Gm10184	773.931	0.443012	0.125428	3.53199	0.000412441	0.00712067
MGP_BALBcJ_G0033898__Nod2	150.936	0.656551	0.185976	3.5303	0.000415094	0.00715867
MGP_BALBcJ_G0025683__Scai	523.516	-0.522245	0.147979	-3.52917	0.000416863	0.00718137
MGP_BALBcJ_G0027064__Pde7a	1903.06	-0.521607	0.147814	-3.52881	0.000417435	0.00718342
MGP_BALBcJ_G0020079__Trmt61a	234.782	0.923021	0.261648	3.52772	0.000419148	0.00719727
MGP_BALBcJ_G0025593__Sh2d3c	439.941	1.34457	0.381139	3.52776	0.000419096	0.00719727
MGP_BALBcJ_G0021018__Ppif	532.14	0.575969	0.163334	3.52632	0.00042137	0.00722367
MGP_BALBcJ_G0022174__Creld2	1284.73	0.950773	0.269632	3.52618	0.000421597	0.00722367
MGP_BALBcJ_G0028866__Fgr	249.401	2.58495	0.733232	3.52542	0.000422807	0.00722982
MGP_BALBcJ_G0030828__Tacstd2	179.149	1.54943	0.439507	3.52538	0.000422868	0.00722982
MGP_BALBcJ_G0018036__Bcl11a	285.781	-0.840761	0.238582	-3.52399	0.000425095	0.00724766
MGP_BALBcJ_G0018304__2210407C18Rik	2051.77	-0.916302	0.260027	-3.52388	0.000425284	0.00724766
MGP_BALBcJ_G0026438__Prom2	198.418	-0.968934	0.274955	-3.52398	0.000425122	0.00724766
MGP_BALBcJ_G0028748__Grik3	992.234	-0.572907	0.162627	-3.52283	0.000426969	0.00726855
MGP_BALBcJ_G0018859__Dynll2	4629.92	-0.552338	0.156807	-3.5224	0.000427656	0.00727245
MGP_BALBcJ_G0036000__Hdx	7.54462	2.75686	0.782953	3.5211	0.000429757	0.00730034
MGP_BALBcJ_G0015983__Aox1	884.841	-0.659946	0.187502	-3.51967	0.000432091	0.00733214
MGP_BALBcJ_G0024452__Ablim3	505.984	-0.770104	0.218923	-3.51769	0.000435318	0.00737899
MGP_BALBcJ_G0025702__Tnfaip6	91.7456	2.43712	0.693055	3.51649	0.000437296	0.0074046
MGP_BALBcJ_G0030745__Mturn	558.97	-0.883236	0.251315	-3.51446	0.000440644	0.00745333
MGP_BALBcJ_G0034147__Cmip	1908.4	0.439842	0.125183	3.51359	0.000442099	0.00746997
MGP_BALBcJ_G0026383__Sord	830.704	-0.724088	0.206229	-3.51109	0.00044628	0.00753258
MGP_BALBcJ_G0020094__Inf2	784.813	0.708979	0.201973	3.51027	0.000447651	0.00754768
MGP_BALBcJ_G0029413__Yes1	1892.32	-0.363283	0.103501	-3.50994	0.000448208	0.00754905
MGP_BALBcJ_G0031751__Fosb	288.274	2.51204	0.715816	3.50934	0.000449218	0.00755803
MGP_BALBcJ_G0018478__Trp53	1348.59	0.449565	0.128116	3.50905	0.000449711	0.00755829
MGP_BALBcJ_G0027677__NA	1135.75	-0.532779	0.151928	-3.50679	0.00045354	0.00760652
MGP_BALBcJ_G0031386__Lrp6	4172.59	-0.225134	0.0641953	-3.50702	0.000453162	0.00760652
MGP_BALBcJ_G0035793__Renbp	1208.76	0.391339	0.111605	3.50648	0.000454082	0.00760756
MGP_BALBcJ_G0028792__Ak2	1834.13	0.571513	0.163044	3.50526	0.00045616	0.0076343
MGP_BALBcJ_G0026576__Kiz	558.341	-0.49686	0.141807	-3.50378	0.000458703	0.00766876
MGP_BALBcJ_G0018013__Ugp2	4288.88	-0.619171	0.176763	-3.50284	0.000460327	0.00767592
MGP_BALBcJ_G0028123__Aqp7	258.809	-1.59558	0.455532	-3.50267	0.000460626	0.00767592
MGP_BALBcJ_G0028999__Mrto4	488.589	0.569199	0.162525	3.50223	0.000461386	0.00767592
MGP_BALBcJ_G0030342__Arpc1b	7545.57	0.398775	0.113866	3.50213	0.000461553	0.00767592
MGP_BALBcJ_G0035190__NA	165.455	-1.69116	0.482891	-3.50216	0.000461496	0.00767592
MGP_BALBcJ_G0016214__NA	89.046	1.29467	0.369968	3.49942	0.00046628	0.0077464
MGP_BALBcJ_G0034132__Nudt7	1015.79	-0.594221	0.169865	-3.49819	0.000468432	0.00777401
MGP_BALBcJ_G0019154__Etv4	26.7621	2.18894	0.625993	3.49674	0.000470974	0.00780803
MGP_BALBcJ_G0019241__Ftsj3	1445.17	0.508079	0.145354	3.49546	0.000473241	0.0078374
MGP_BALBcJ_G0025720__Acvr1	849.73	0.567233	0.162354	3.4938	0.000476205	0.00787825
MGP_BALBcJ_G0032372__Aen	1214.04	0.542259	0.155267	3.49243	0.000478652	0.00791048
MGP_BALBcJ_G0024052__Gm10309	6.72633	3.34458	0.957795	3.49196	0.000479493	0.00791614
MGP_BALBcJ_G0015866__Sema4c	1017.3	0.459784	0.131692	3.49135	0.000480581	0.00792584
MGP_BALBcJ_G0031640__Trim28	2987.92	0.257156	0.0736698	3.49065	0.000481847	0.00793175
MGP_BALBcJ_G0033332__Col4a1	10568.9	0.828845	0.237451	3.4906	0.00048194	0.00793175
MGP_BALBcJ_G0018440__Pik3r5	354.268	1.40345	0.402394	3.48775	0.000487099	0.00799645
MGP_BALBcJ_G0023111__Agpat4	103.934	0.920224	0.263874	3.48737	0.000487804	0.00799645
MGP_BALBcJ_G0024418__Fbn2	148.589	1.71056	0.490509	3.48732	0.00048789	0.00799645
MGP_BALBcJ_G0035836__Tbl1x	2882.5	-0.334821	0.0960048	-3.48754	0.000487479	0.00799645
MGP_BALBcJ_G0027008__Rgs19	493.473	0.49077	0.140761	3.48655	0.000489298	0.00801125
MGP_BALBcJ_G0033629__Tma16	187.107	0.623751	0.179102	3.48266	0.000496456	0.00812006
MGP_BALBcJ_G0026951__Sycp2	25.2994	2.19044	0.629154	3.48156	0.000498493	0.00813657
MGP_BALBcJ_G0028738__Yrdc	601.184	0.352157	0.101143	3.48179	0.000498081	0.00813657
MGP_BALBcJ_G0003336__NA	243.906	-0.635611	0.182609	-3.48073	0.000500054	0.0081429
MGP_BALBcJ_G0030045__Bcl7a	993.696	-0.421657	0.121138	-3.4808	0.000499925	0.0081429
MGP_BALBcJ_G0030319__Rac1	6965.12	0.37242	0.107001	3.48053	0.000500422	0.0081429
MGP_BALBcJ_G0015845__Ccdc115	437.411	0.394738	0.113423	3.48024	0.000500959	0.00814328
MGP_BALBcJ_G0018493__Zbtb4	2004.52	-0.372629	0.107093	-3.47948	0.000502396	0.00815827
MGP_BALBcJ_G0027071__Hltf	1046.41	-0.351375	0.101036	-3.47773	0.000505678	0.00820317
MGP_BALBcJ_G0033333__Col4a2	7599.4	0.761603	0.219091	3.4762	0.000508581	0.0082334
MGP_BALBcJ_G0034389__Zfp266	1545.77	-0.279899	0.0805154	-3.47635	0.000508294	0.0082334
MGP_BALBcJ_G0021148__Mat1a	15.9633	-2.24208	0.645118	-3.47545	0.000509988	0.00824775
MGP_BALBcJ_G0028876__Fam46b	78.2752	1.47008	0.42318	3.47388	0.000512986	0.00828779
MGP_BALBcJ_G0032864__Far1	5874.36	-0.569309	0.164021	-3.47096	0.000518603	0.00837001
MGP_BALBcJ_G0030677__Lrrc61	368.374	-0.544405	0.156862	-3.47061	0.000519287	0.00837251
MGP_BALBcJ_G0035062__Tpbg	193.538	0.921213	0.265479	3.47001	0.000520442	0.00838261
MGP_BALBcJ_G0032249__Nomo1	2020.68	0.336589	0.0970168	3.46939	0.000521645	0.00839345
MGP_BALBcJ_G0023474__Zfp871	1480.03	-0.425361	0.122629	-3.46869	0.000523	0.0084031
MGP_BALBcJ_G0024475__NA	1276.39	-0.611165	0.176217	-3.46826	0.000523835	0.0084031
MGP_BALBcJ_G0024826__Slc15a3	428.985	2.51503	0.725123	3.46842	0.000523534	0.0084031
MGP_BALBcJ_G0033477__Adgra2	288.127	1.28885	0.371645	3.46796	0.000524431	0.00840415
MGP_BALBcJ_G0028248__NA	1163.29	0.522833	0.150779	3.46755	0.000525232	0.00840848
MGP_BALBcJ_G0016571__Angptl1	15.3364	-2.55109	0.735922	-3.46652	0.000527235	0.00842353
MGP_BALBcJ_G0028827__Tinagl1	1934.93	0.42524	0.122666	3.46666	0.000526961	0.00842353
MGP_BALBcJ_G0003489__Grin1os	73.6295	-1.81017	0.522268	-3.46598	0.00052831	0.00843221
MGP_BALBcJ_G0001441__NA	11.6483	2.55867	0.738585	3.46428	0.000531647	0.00846873
MGP_BALBcJ_G0035891__Las1l	1257.41	0.702627	0.202821	3.46427	0.000531667	0.00846873
MGP_BALBcJ_G0029082__Dhrs3	2508.4	-0.850432	0.245512	-3.46392	0.000532375	0.00847149
MGP_BALBcJ_G0036212__Car5b	1974.37	-0.730314	0.21089	-3.463	0.000534179	0.00849167
MGP_BALBcJ_G0035467__Ccr5	554.364	1.47173	0.425118	3.46194	0.000536298	0.00851681
MGP_BALBcJ_G0033734__Slc27a1	5439.07	-0.523169	0.151198	-3.46015	0.000539865	0.00856489
MGP_BALBcJ_G0034421__Qtrt1	261.257	0.506344	0.146398	3.45868	0.000542839	0.00860345
MGP_BALBcJ_G0020804__Hmgcr	539.007	0.495979	0.143448	3.45757	0.000545076	0.00862715
MGP_BALBcJ_G0036057__Gprasp1	693.965	-0.446628	0.129181	-3.4574	0.000545422	0.00862715
MGP_BALBcJ_G0014281__NA	664.576	0.914475	0.264607	3.45598	0.000548306	0.0086519
MGP_BALBcJ_G0017468__Lmnb2	440.496	0.433063	0.125324	3.45555	0.000549171	0.0086519
MGP_BALBcJ_G0031221__Clec4n	158.794	2.92453	0.84632	3.45558	0.000549108	0.0086519
MGP_BALBcJ_G0031748__Vasp	1886.74	0.479394	0.138708	3.45613	0.000547992	0.0086519
MGP_BALBcJ_G0021200__Tlr11	19.6597	-1.70389	0.493199	-3.45476	0.000550775	0.00866855
MGP_BALBcJ_G0035398__Scn5a	89.0249	1.59541	0.461921	3.45386	0.000552618	0.00868894
MGP_BALBcJ_G0016635__Mpc2	1760.62	-0.501499	0.145224	-3.45329	0.000553803	0.00869893
MGP_BALBcJ_G0019955__Kcnk13	34.7483	1.66937	0.483493	3.45273	0.000554948	0.00870828
MGP_BALBcJ_G0017330__Col18a1	826.49	0.817713	0.236871	3.45214	0.000556159	0.00871772
MGP_BALBcJ_G0018658__Pitpna	5400.43	0.339596	0.098382	3.45182	0.000556829	0.00871772
MGP_BALBcJ_G0027028__Tpd52	940.197	0.459618	0.13316	3.45164	0.000557199	0.00871772
MGP_BALBcJ_G0019403__Pgs1	1984.66	0.503547	0.145919	3.45086	0.000558812	0.00873432
MGP_BALBcJ_G0019297__Sdk2	217.144	0.597778	0.173245	3.45047	0.000559609	0.00873818
MGP_BALBcJ_G0034955__Rab8b	1036.43	0.877544	0.254542	3.44754	0.000565726	0.00882499
MGP_BALBcJ_G0027405__Adam15	2288.98	0.402034	0.11664	3.4468	0.000567265	0.0088403
MGP_BALBcJ_G0001959__NA	12.0844	2.64191	0.767052	3.44424	0.000572668	0.00890698
MGP_BALBcJ_G0018988__Cacnb1	343.967	-0.892886	0.259225	-3.44444	0.000572252	0.00890698
MGP_BALBcJ_G0019129__Ezh1	1762.94	-0.416118	0.120892	-3.44207	0.000577286	0.00892625
MGP_BALBcJ_G0019899__Jdp2	292.14	0.82207	0.238806	3.44241	0.000576545	0.00892625
MGP_BALBcJ_G0022006__Ncf4	341.589	1.49596	0.434554	3.44253	0.000576302	0.00892625
MGP_BALBcJ_G0023028__Clic6	999.67	1.12859	0.327833	3.44258	0.000576198	0.00892625
MGP_BALBcJ_G0023423__Ppil1	369.794	0.438307	0.12733	3.44228	0.000576839	0.00892625
MGP_BALBcJ_G0027595__Lix1l	501.752	0.44577	0.129503	3.44217	0.000577075	0.00892625
MGP_BALBcJ_G0035143__Mras	257.099	0.46101	0.133985	3.44077	0.00058007	0.00896056
MGP_BALBcJ_G0022445__NA	61.5109	-1.6687	0.485024	-3.44044	0.000580761	0.00896249
MGP_BALBcJ_G0025667__Zbtb26	300.252	-0.442029	0.128564	-3.4382	0.000585599	0.00902837
MGP_BALBcJ_G0019911__Cipc	1999.51	0.324374	0.0943826	3.4368	0.00058864	0.00906643
MGP_BALBcJ_G0034960__C2cd4b	60.9048	1.80878	0.526856	3.43316	0.000596594	0.00918002
MGP_BALBcJ_G0016543__Rnasel	1820.83	-0.614003	0.178921	-3.4317	0.000599804	0.00919371
MGP_BALBcJ_G0025589__Ak1	115.763	1.04991	0.305886	3.43237	0.000598336	0.00919371
MGP_BALBcJ_G0032539__Slco2b1	715.212	-0.632027	0.184161	-3.43193	0.00059931	0.00919371
MGP_BALBcJ_G0034827__Snx33	912.797	-0.431791	0.125819	-3.43184	0.000599505	0.00919371
MGP_BALBcJ_G0015260__Crybg3	301.221	-0.649352	0.189279	-3.43066	0.000602121	0.0092203
MGP_BALBcJ_G0029091__Plod1	1103.74	0.39913	0.116353	3.43033	0.000602839	0.00922239
MGP_BALBcJ_G0019255__Ddx5	25817	-0.265969	0.0775611	-3.42915	0.00060548	0.00923605
MGP_BALBcJ_G0019380__St6galnac2	7239.88	-0.495398	0.144449	-3.42958	0.000604524	0.00923605
MGP_BALBcJ_G0025094__Lcor	387.929	-0.407936	0.118958	-3.42924	0.000605278	0.00923605
MGP_BALBcJ_G0028102__Zfp292	1676.74	-0.402552	0.117405	-3.42873	0.000606405	0.00924126
MGP_BALBcJ_G0027577__Sf3b4	813.892	0.355324	0.103702	3.42639	0.000611657	0.00931234
MGP_BALBcJ_G0020487__Ecm2	154.145	-1.13887	0.332442	-3.42577	0.000613054	0.00931537
MGP_BALBcJ_G0026176__Nat10	876.1	0.463754	0.135382	3.42552	0.000613619	0.00931537
MGP_BALBcJ_G0027588__Fcgr1	303.12	1.48278	0.432831	3.42576	0.000613073	0.00931537
MGP_BALBcJ_G0032881__Xylt1	187.592	1.56325	0.456512	3.42434	0.000616304	0.00934718
MGP_BALBcJ_G0034202__Ctu2	325.029	0.481933	0.140767	3.42363	0.000617913	0.00936263
MGP_BALBcJ_G0028676__P3h1	519.57	0.549756	0.160667	3.42171	0.000622289	0.00941993
MGP_BALBcJ_G0034167__Cotl1	4153.25	0.666598	0.194927	3.41973	0.000626829	0.00947959
MGP_BALBcJ_G0029485__Lyar	334.639	0.620857	0.181585	3.4191	0.000628289	0.00949261
MGP_BALBcJ_G0026328__Mga	2390.26	-0.354746	0.103804	-3.41744	0.00063212	0.0095414
MGP_BALBcJ_G0021145__Fam213a	844.101	-0.460982	0.134922	-3.41665	0.000633962	0.0095601
MGP_BALBcJ_G0023298__Hn1l	779.783	0.521116	0.152542	3.41622	0.000634969	0.00956618
MGP_BALBcJ_G0011048__NA	272.899	0.452184	0.132443	3.41418	0.000639736	0.00961707
MGP_BALBcJ_G0022316__Slc11a2	1595.61	0.392517	0.114973	3.414	0.000640167	0.00961707
MGP_BALBcJ_G0022410__Pde1b	141.434	1.12532	0.329594	3.41426	0.000639546	0.00961707
MGP_BALBcJ_G0021705__Pdzd2	1417.17	-0.378363	0.110879	-3.4124	0.000643933	0.00964641
MGP_BALBcJ_G0031445__Golt1b	821.609	0.462177	0.135427	3.41274	0.000643125	0.00964641
MGP_BALBcJ_G0032784__Ppfibp2	1025.32	-0.534559	0.156652	-3.4124	0.000643946	0.00964641
MGP_BALBcJ_G0024981__Smarca2	2081.81	-0.530627	0.155544	-3.41143	0.000646221	0.00966904
MGP_BALBcJ_G0028639__B4galt2	77.2069	0.940786	0.27579	3.41124	0.000646677	0.00966904
MGP_BALBcJ_G0027561__Mcl1	5782.51	0.48494	0.142216	3.40988	0.000649907	0.00970818
MGP_BALBcJ_G0023825__NA	24.8147	2.9446	0.863739	3.40913	0.000651708	0.00972124
MGP_BALBcJ_G0026473__NA	1005.23	0.811715	0.238109	3.409	0.000652008	0.00972124
MGP_BALBcJ_G0022025__Nol12	515.996	0.503623	0.147796	3.40757	0.000655446	0.00976331
MGP_BALBcJ_G0035156__Ppp2r3a	3658.15	-0.464003	0.13618	-3.40727	0.000656161	0.00976478
MGP_BALBcJ_G0031264__Nop2	428.297	0.590055	0.173421	3.40245	0.000667857	0.00992951
MGP_BALBcJ_G0021959__Bop1	1135.22	0.483395	0.142137	3.40091	0.000671631	0.0099576
MGP_BALBcJ_G0022224__Pus7l	132.021	0.591404	0.17389	3.40103	0.000671322	0.0099576
MGP_BALBcJ_G0031827__Cd177	48.7015	1.82175	0.535586	3.40141	0.000670386	0.0099576
MGP_BALBcJ_G0029133__Car6	535.835	-0.716648	0.210836	-3.39908	0.000676139	0.0100151
MGP_BALBcJ_G0016415__Dstyk	1593.9	-0.332341	0.0977813	-3.39882	0.00067678	0.0100152
MGP_BALBcJ_G0018231__Uqcrq	1350.17	0.318419	0.0937569	3.39622	0.000683241	0.0100989
MGP_BALBcJ_G0032523__Tsku	171.168	0.748126	0.220294	3.39603	0.000683709	0.0100989
MGP_BALBcJ_G0026111__Spi1	295.011	1.37959	0.406664	3.39246	0.000692682	0.0102219
MGP_BALBcJ_G0030121__Tmem248	2051.74	0.322381	0.0950897	3.39029	0.000698198	0.0102937
MGP_BALBcJ_G0018175__Gfpt2	274.433	0.992008	0.292698	3.38918	0.000701016	0.0103257
MGP_BALBcJ_G0034864__6030419C18Rik	42.5754	1.43743	0.424315	3.38765	0.000704945	0.0103739
MGP_BALBcJ_G0010594__NA	234.367	0.559788	0.165425	3.38393	0.000714554	0.0105055
MGP_BALBcJ_G0023648__Trim15	40.0996	1.86105	0.550025	3.38358	0.000715472	0.0105093
MGP_BALBcJ_G0023959__Tgif1	1755.25	0.849356	0.25105	3.38322	0.000716413	0.0105134
MGP_BALBcJ_G0030276__Mafk	1163.25	0.33923	0.100364	3.38001	0.000724831	0.0106271
MGP_BALBcJ_G0019146__Vat1	4536.7	0.278592	0.0824485	3.37899	0.000727533	0.0106568
MGP_BALBcJ_G0026285__Thbs1	3768.31	1.67979	0.497435	3.37689	0.000733093	0.0107283
MGP_BALBcJ_G0026516__Pcna	1247.27	0.437761	0.129687	3.37551	0.000736797	0.0107726
MGP_BALBcJ_G0016533__Ncf2	518.708	1.21363	0.359608	3.37486	0.00073853	0.010788
MGP_BALBcJ_G0023131__Dact2	704.232	0.501254	0.148588	3.37344	0.000742355	0.0108339
MGP_BALBcJ_G0016866__Ptpn14	1187.05	-0.43586	0.12924	-3.37249	0.000744931	0.0108439
MGP_BALBcJ_G0017827__Cd63	6881.1	0.448607	0.133062	3.37142	0.000747829	0.0108439
MGP_BALBcJ_G0019578__Kidins220	3720.73	-0.361034	0.107055	-3.3724	0.000745148	0.0108439
MGP_BALBcJ_G0022647__Adipoq	2477.73	-1.00145	0.297024	-3.3716	0.00074732	0.0108439
MGP_BALBcJ_G0023459__Rrp1b	669.557	0.490909	0.145603	3.37156	0.000747449	0.0108439
MGP_BALBcJ_G0028596__Faah	316.559	0.704153	0.208856	3.37148	0.000747663	0.0108439
MGP_BALBcJ_G0033303__Cd209d	62.4553	0.943737	0.279829	3.37255	0.000744758	0.0108439
MGP_BALBcJ_G0030985__Rpn1	6404.37	0.397134	0.117807	3.37105	0.000748821	0.0108483
MGP_BALBcJ_G0019427__Nptx1	10.2002	3.02287	0.897078	3.36969	0.000752536	0.0108922
MGP_BALBcJ_G0000064__Ighv3-5	16.0958	-4.35673	1.29318	-3.36902	0.000754361	0.0109086
MGP_BALBcJ_G0034048__Ddx28	202.156	0.51257	0.152155	3.36873	0.000755149	0.0109101
MGP_BALBcJ_G0035208__Rrp9	305.019	0.66865	0.198583	3.36711	0.000759611	0.0109645
MGP_BALBcJ_G0034409__Raver1	1724.5	0.28304	0.0840768	3.36645	0.000761436	0.0109809
MGP_BALBcJ_G0027268__Ppm1l	1197.4	-0.463067	0.137654	-3.36399	0.00076824	0.0110689
MGP_BALBcJ_G0016346__Dbi	9991.71	-0.69598	0.206943	-3.36315	0.000770592	0.0110836
MGP_BALBcJ_G0026570__Rin2	8435.32	-0.445303	0.132417	-3.36288	0.000771352	0.0110836
MGP_BALBcJ_G0030160__Pom121	1024.42	0.40866	0.121515	3.36303	0.000770908	0.0110836
MGP_BALBcJ_G0022534__Sdf2l1	666.127	1.17276	0.348884	3.36146	0.000775311	0.0111303
MGP_BALBcJ_G0025110__Pi4k2a	1252.66	0.363249	0.10815	3.35876	0.000782921	0.0112294
MGP_BALBcJ_G0026781__Plcg1	2907.5	-0.350575	0.104388	-3.35837	0.000784025	0.0112351
MGP_BALBcJ_G0029327__Abcf2	1665.35	0.283173	0.0844689	3.3524	0.000801146	0.0114701
MGP_BALBcJ_G0018872__Gm525	20.7893	-2.24781	0.670565	-3.35211	0.000801971	0.0114715
MGP_BALBcJ_G0030812__Prdm5	37.7019	1.03172	0.307815	3.35176	0.000802995	0.0114758
MGP_BALBcJ_G0019363__Evpl	370.441	-0.844333	0.251935	-3.35139	0.000804069	0.0114808
MGP_BALBcJ_G0018097__Pank3	3687.62	-0.331606	0.0989683	-3.35063	0.000806277	0.0114916
MGP_BALBcJ_G0028803__Zbtb8a	573.334	0.758844	0.226474	3.35069	0.000806113	0.0114916
MGP_BALBcJ_G0012316__NA	78.485	1.39273	0.415746	3.34996	0.000808226	0.011509
MGP_BALBcJ_G0015920__Uxs1	649.785	0.369402	0.110335	3.34801	0.00081395	0.0115384
MGP_BALBcJ_G0017261__Egr2	222.108	1.70825	0.510233	3.34798	0.000814025	0.0115384
MGP_BALBcJ_G0017531__Appl2	6089.68	-0.456903	0.136453	-3.34843	0.000812698	0.0115384
MGP_BALBcJ_G0027299__Gucy1a3	206.214	-0.667858	0.199494	-3.34777	0.000814659	0.0115384
MGP_BALBcJ_G0030801__Gprin3	156.216	-0.792276	0.236632	-3.34814	0.000813573	0.0115384
MGP_BALBcJ_G0031155__8430408G22Rik	140.587	-1.19114	0.355704	-3.34868	0.000811965	0.0115384
MGP_BALBcJ_G0030877__Reg3g	9.56505	2.69836	0.806303	3.34658	0.000818146	0.0115775
MGP_BALBcJ_G0028187__Tpm2	2758.07	0.405775	0.121272	3.34599	0.000819894	0.0115919
MGP_BALBcJ_G0033959__Usb1	777.044	0.272707	0.0815104	3.34568	0.000820822	0.0115947
MGP_BALBcJ_G0017171__Tbc1d32	314.568	-0.452459	0.13533	-3.34337	0.000827686	0.0116812
MGP_BALBcJ_G0019276__Slc16a6	255.152	1.32916	0.397612	3.34287	0.000829182	0.0116919
MGP_BALBcJ_G0021813__Tnfrsf11b	117.068	2.0463	0.612713	3.33973	0.000838595	0.0118141
MGP_BALBcJ_G0032120__Cd33	272.394	1.12721	0.337574	3.33915	0.000840344	0.0118283
MGP_BALBcJ_G0022636__Dgkg	11.3279	2.49907	0.748505	3.33875	0.00084156	0.0118349
MGP_BALBcJ_G0035257__Amigo3	53.8953	1.13066	0.338736	3.33789	0.000844177	0.0118611
MGP_BALBcJ_G0019024__Tns4	567.198	-0.687652	0.206056	-3.33721	0.000846247	0.0118797
MGP_BALBcJ_G0016510__Rgs1	106.663	2.16847	0.650062	3.33579	0.000850563	0.01192
MGP_BALBcJ_G0027361__Cct3	3054.29	0.447116	0.134037	3.33577	0.000850626	0.01192
MGP_BALBcJ_G0030376__Mtus2	31.1183	-2.16891	0.650676	-3.33332	0.000858154	0.0120149
MGP_BALBcJ_G0020949__3830406C13Rik	667.598	-0.367272	0.110202	-3.33272	0.000860003	0.0120302
MGP_BALBcJ_G0020828__Map1b	850.43	0.779753	0.234092	3.33097	0.000865434	0.0120955
MGP_BALBcJ_G0003530__Zeb2os	31.6216	1.35348	0.406683	3.32809	0.000874428	0.0121889
MGP_BALBcJ_G0025345__Skida1	48.9686	-1.10729	0.332703	-3.32815	0.000874241	0.0121889
MGP_BALBcJ_G0035479__Shroom4	285.775	-0.39019	0.117233	-3.32834	0.000873651	0.0121889
MGP_BALBcJ_G0018715__Aldoc	4709.54	-0.629067	0.189068	-3.3272	0.00087723	0.0122172
MGP_BALBcJ_G0017032__Ctgf	3347.05	0.898215	0.270005	3.32666	0.00087893	0.0122302
MGP_BALBcJ_G0016540__Npl	153.483	1.88046	0.565774	3.3237	0.000888319	0.0123391
MGP_BALBcJ_G0035917__Dlg3	783.946	-0.482959	0.145303	-3.32381	0.000887981	0.0123391
MGP_BALBcJ_G0016377__NA	187.255	-0.596859	0.179609	-3.3231	0.000890241	0.012355
MGP_BALBcJ_G0027709__Cd53	724.796	1.83861	0.553464	3.32201	0.000893729	0.0123926
MGP_BALBcJ_G0019197__Acbd4	1024.2	-0.501579	0.151016	-3.32137	0.000895775	0.0124101
MGP_BALBcJ_G0024377__Eif1a	1295.18	0.567521	0.170883	3.32111	0.000896607	0.0124108
MGP_BALBcJ_G0019369__Ubald2	842.415	0.407841	0.122851	3.31981	0.000900799	0.0124579
MGP_BALBcJ_G0022009__Mpst	405.902	-0.382448	0.115255	-3.31826	0.000905787	0.012516
MGP_BALBcJ_G0017143__Prep	846.599	0.441539	0.133087	3.31768	0.000907693	0.0125314
MGP_BALBcJ_G0017680__Tspan8	288.583	-0.708085	0.213491	-3.3167	0.000910876	0.0125644
MGP_BALBcJ_G0021087__Galnt15	800.451	-0.765476	0.230815	-3.3164	0.000911853	0.0125669
MGP_BALBcJ_G0006442__E130102H24Rik	282.183	-0.580753	0.175223	-3.31437	0.000918499	0.0126475
MGP_BALBcJ_G0025228__Acsl5	1457.08	0.402383	0.121441	3.3134	0.000921685	0.0126804
MGP_BALBcJ_G0017252__Herc4	1131.55	-0.29326	0.0885507	-3.31177	0.000927066	0.012737
MGP_BALBcJ_G0034115__Znrf1	2271.29	0.437563	0.132128	3.31167	0.000927409	0.012737
MGP_BALBcJ_G0024420__Isoc1	3684.25	-0.517151	0.15622	-3.3104	0.000931617	0.0127727
MGP_BALBcJ_G0026724__Gdf5	46.0563	-1.45262	0.438796	-3.31047	0.000931385	0.0127727
MGP_BALBcJ_G0024832__Ccdc86	454.643	0.613841	0.185462	3.3098	0.000933636	0.0127893
MGP_BALBcJ_G0031055__Arl6ip5	2109.58	0.244847	0.0740041	3.30856	0.000937765	0.0128347
MGP_BALBcJ_G0002969__Tnfsf13os	183.237	-0.68727	0.207807	-3.30725	0.000942154	0.0128643
MGP_BALBcJ_G0019582__Cmpk2	437.793	-1.06303	0.321404	-3.30746	0.000941463	0.0128643
MGP_BALBcJ_G0022793__Zbtb20	125.042	-0.969766	0.293239	-3.30708	0.000942728	0.0128643
MGP_BALBcJ_G0035046__Filip1	109.076	-0.683003	0.206535	-3.30695	0.000943174	0.0128643
MGP_BALBcJ_G0032735__Fam160a2	2677.72	-0.791789	0.239469	-3.30644	0.000944887	0.0128656
MGP_BALBcJ_G0036081__Fam199x	556.879	-0.317754	0.0960958	-3.30664	0.000944218	0.0128656
MGP_BALBcJ_G0033254__Kcnq1	111.857	-1.15832	0.350371	-3.30599	0.000946416	0.0128753
MGP_BALBcJ_G0030373__Flt1	1220.51	0.629195	0.190474	3.30331	0.000955494	0.0129877
MGP_BALBcJ_G0026932__Pmepa1	3863.34	0.877523	0.265713	3.30252	0.00095821	0.0130134
MGP_BALBcJ_G0016817__Ephx1	6246.59	-0.572988	0.173541	-3.30174	0.000960887	0.0130274
MGP_BALBcJ_G0017441__Mbd3	1526.82	0.241597	0.073177	3.30155	0.000961537	0.0130274
MGP_BALBcJ_G0019391__Tnrc6c	1270.6	-0.306107	0.0927178	-3.3015	0.000961702	0.0130274
MGP_BALBcJ_G0034169__Usp10	1450.58	0.263705	0.0799	3.30044	0.000965328	0.0130653
MGP_BALBcJ_G0021487__Loxl2	514.602	1.07668	0.326453	3.29812	0.000973329	0.0131624
MGP_BALBcJ_G0015967__Coq10b	274.836	0.662603	0.201025	3.29611	0.000980322	0.0132352
MGP_BALBcJ_G0031339__Klra17	7.64156	3.31614	1.00608	3.2961	0.000980382	0.0132352
MGP_BALBcJ_G0023292__Nubp2	666.058	0.421392	0.127868	3.29552	0.000982411	0.0132513
MGP_BALBcJ_G0016035__Ccnyl1	375.659	0.585511	0.177706	3.29483	0.000984815	0.013261
MGP_BALBcJ_G0021271__Mrpl52	477.313	0.582503	0.176806	3.29459	0.000985641	0.013261
MGP_BALBcJ_G0029291__Gsap	190.594	1.30645	0.396542	3.29462	0.000985549	0.013261
MGP_BALBcJ_G0029728__Scarb2	11091.2	0.294627	0.0895219	3.29112	0.00099789	0.013403
MGP_BALBcJ_G0031128__Pparg	349.481	-0.679884	0.206576	-3.2912	0.000997602	0.013403
MGP_BALBcJ_G0033955__Kifc3	601.432	0.511175	0.155363	3.2902	0.00100114	0.0134353
MGP_BALBcJ_G0030352__Cyp3a57	13.6594	2.5806	0.784944	3.28762	0.00101037	0.0135477
MGP_BALBcJ_G0016868__Prox1	441.734	-1.04123	0.316861	-3.28607	0.00101595	0.0135766
MGP_BALBcJ_G0019875__Aldh6a1	1967.64	-0.41453	0.126137	-3.28635	0.00101496	0.0135766
MGP_BALBcJ_G0026180__Fbxo3	3181	-0.323033	0.0982968	-3.2863	0.00101511	0.0135766
MGP_BALBcJ_G0030272__Zfand2a	2394.73	0.714653	0.217455	3.28643	0.00101464	0.0135766
MGP_BALBcJ_G0034007__Hsf4	71.89	-0.774996	0.235865	-3.28577	0.00101705	0.0135799
MGP_BALBcJ_G0019646__Ifrd1	2700.51	0.480323	0.146219	3.28494	0.00102003	0.0136081
MGP_BALBcJ_G0032131__Klk10	22.8581	2.43515	0.741455	3.28429	0.00102238	0.013628
MGP_BALBcJ_G0029045__Efhd2	3458.76	0.668581	0.203597	3.28384	0.00102404	0.0136387
MGP_BALBcJ_G0028754__Eva1b	421.648	-0.707203	0.215389	-3.28338	0.00102572	0.0136495
MGP_BALBcJ_G0033279__Tpcn2	426.572	0.607919	0.185212	3.28229	0.00102966	0.0136905
MGP_BALBcJ_G0026149__Accs	499.765	-0.551333	0.167984	-3.28205	0.00103054	0.0136908
MGP_BALBcJ_G0017247__Rufy2	531.88	-0.429853	0.130983	-3.28175	0.00103165	0.013694
MGP_BALBcJ_G0033918__Ces1d	1283.67	-0.789842	0.240706	-3.28136	0.00103307	0.0137014
MGP_BALBcJ_G0027920__NA	4321.42	0.175532	0.0535025	3.28083	0.00103504	0.013716
MGP_BALBcJ_G0033798__Inpp4b	123.53	-0.88885	0.271055	-3.27923	0.00104092	0.0137824
MGP_BALBcJ_G0030003__Erp29	2055.44	0.324052	0.0988267	3.27899	0.00104179	0.0137825
MGP_BALBcJ_G0023367__Ergic1	1606.92	0.355991	0.10863	3.27709	0.00104884	0.0138641
MGP_BALBcJ_G0018104__Nudcd2	610.831	0.343871	0.104994	3.27515	0.00105606	0.0139428
MGP_BALBcJ_G0023869__Sh3gl1	1032.73	0.250604	0.0765237	3.27485	0.00105717	0.0139428
MGP_BALBcJ_G0024693__Ltbp3	7359.48	0.44751	0.136653	3.27478	0.00105743	0.0139428
MGP_BALBcJ_G0019627__Snx13	2281.1	-0.250856	0.0766626	-3.27221	0.00106711	0.0140587
MGP_BALBcJ_G0021036__Pde12	497.821	0.39753	0.121507	3.27166	0.00106917	0.0140702
MGP_BALBcJ_G0033260__Tnfrsf26	47.3232	1.69833	0.519128	3.27151	0.00106976	0.0140702
MGP_BALBcJ_G0002238__NA	32.891	1.94281	0.594654	3.26713	0.00108645	0.0142779
MGP_BALBcJ_G0026309__Gm14137	27.837	1.27337	0.390015	3.26493	0.00109492	0.0143772
MGP_BALBcJ_G0019411__C1qtnf1	949.441	0.672308	0.205936	3.26464	0.00109604	0.0143801
MGP_BALBcJ_G0007292__Gm9951	26.212	1.16785	0.357811	3.26388	0.00109897	0.0144066
MGP_BALBcJ_G0036901__Gm16310	155.521	-0.967856	0.296576	-3.26343	0.00110072	0.0144176
MGP_BALBcJ_G0022602__Klhl24	4253.12	-0.494841	0.151651	-3.26303	0.00110228	0.0144262
MGP_BALBcJ_G0015809__Mcm3	190.971	0.774926	0.237512	3.26267	0.00110367	0.0144324
MGP_BALBcJ_G0011394__NA	856.375	0.515501	0.158018	3.26228	0.00110518	0.0144403
MGP_BALBcJ_G0031187__Cecr2	574.917	-0.560693	0.17191	-3.26155	0.00110805	0.0144658
MGP_BALBcJ_G0028020__Dpy19l4	1185.92	-0.308421	0.0946191	-3.25961	0.00111567	0.0145533
MGP_BALBcJ_G0018382__Epn2	1637.95	-0.466418	0.143154	-3.25815	0.00112141	0.0145922
MGP_BALBcJ_G0026526__Fermt1	248.429	1.3929	0.427458	3.25857	0.00111975	0.0145922
MGP_BALBcJ_G0032339__Vimp	1526.66	0.446349	0.136988	3.25831	0.00112078	0.0145922
MGP_BALBcJ_G0034861__Stoml1	454.014	-0.433588	0.133179	-3.25569	0.00113119	0.0147073
MGP_BALBcJ_G0024851__Ms4a4d	96.1629	0.616683	0.189447	3.25517	0.00113323	0.0147218
MGP_BALBcJ_G0029399__Ift172	717.28	-0.421373	0.129477	-3.25442	0.00113624	0.0147488
MGP_BALBcJ_G0025394__Nrarp	89.4779	0.767941	0.236023	3.25367	0.00113923	0.0147755
MGP_BALBcJ_G0027200__Tm4sf1	2860.98	1.62019	0.498008	3.25333	0.00114059	0.014781
MGP_BALBcJ_G0031568__Rasl2-9	300.226	0.802087	0.246578	3.25287	0.00114245	0.0147931
MGP_BALBcJ_G0029940__Dynll1	1065.03	0.531179	0.163362	3.25154	0.00114781	0.0148401
MGP_BALBcJ_G0031859__B9d2	85.0092	0.642374	0.197562	3.25151	0.00114796	0.0148401
MGP_BALBcJ_G0030858__Mat2a	4642.36	0.387648	0.119353	3.24793	0.00116249	0.0150158
MGP_BALBcJ_G0019509__Ncoa1	1814.16	-0.52731	0.16239	-3.24719	0.00116551	0.0150425
MGP_BALBcJ_G0023614__Tubb5	5191.59	0.451175	0.139028	3.24522	0.00117361	0.0151347
MGP_BALBcJ_G0034948__Herc1	3234.45	-0.256689	0.079106	-3.24487	0.00117505	0.0151409
MGP_BALBcJ_G0027057__Gm5150	97.3225	1.92466	0.593471	3.24305	0.00118258	0.0152256
MGP_BALBcJ_G0024667__Eif1ad	567.458	0.368026	0.113527	3.24174	0.00118803	0.0152833
MGP_BALBcJ_G0021698__Tars	1396.54	0.370432	0.11428	3.24145	0.00118925	0.0152866
MGP_BALBcJ_G0016945__Rab32	301.075	0.828378	0.255664	3.2401	0.00119486	0.0153338
MGP_BALBcJ_G0020890__Plpp1	375.995	0.497664	0.153589	3.24022	0.00119437	0.0153338
MGP_BALBcJ_G0033180__Sirt3	267.648	-0.470915	0.145353	-3.2398	0.00119612	0.0153376
MGP_BALBcJ_G0032100__Zfp788	263.221	-0.432943	0.133644	-3.23952	0.00119732	0.0153405
MGP_BALBcJ_G0019302__Btbd17	12.4946	1.76027	0.543593	3.23821	0.00120284	0.0153586
MGP_BALBcJ_G0019574__Klf11	1272.01	-0.441588	0.136381	-3.23791	0.00120409	0.0153586
MGP_BALBcJ_G0021852__Trib1	1836.37	0.851231	0.26282	3.23883	0.0012002	0.0153586
MGP_BALBcJ_G0022175__Pim3	1142.69	0.410405	0.126753	3.23782	0.00120445	0.0153586
MGP_BALBcJ_G0027111__Mfn1	2414.27	-0.2665	0.0823013	-3.2381	0.00120327	0.0153586
MGP_BALBcJ_G0034099__Mtss1l	1455.32	0.70731	0.218454	3.2378	0.00120454	0.0153586
MGP_BALBcJ_G0022013__C1qtnf6	299.492	1.20934	0.373665	3.23644	0.00121032	0.0154199
MGP_BALBcJ_G0025101__Pgam1	4284.19	0.420505	0.129941	3.23612	0.00121166	0.0154246
MGP_BALBcJ_G0018409__Hs3st3b1	846.659	-0.71376	0.220653	-3.23477	0.0012174	0.0154729
MGP_BALBcJ_G0022451__Ppl	1240.4	-0.588877	0.182037	-3.23494	0.00121669	0.0154729
MGP_BALBcJ_G0028367__Rasef	1249.23	-0.415205	0.128447	-3.2325	0.00122711	0.0155837
MGP_BALBcJ_G0023098__Ccr6	43.9947	-1.98405	0.613925	-3.23174	0.0012304	0.0156005
MGP_BALBcJ_G0032880__Nucb2	5569.08	-0.902169	0.279147	-3.23188	0.0012298	0.0156005
MGP_BALBcJ_G0015082__Gm12592	11.0863	-2.20359	0.682028	-3.23094	0.00123385	0.0156317
MGP_BALBcJ_G0024171__Fhod3	842.951	-0.664791	0.205815	-3.23004	0.00123774	0.0156684
MGP_BALBcJ_G0023238__Tceb2	1293.29	0.270501	0.0837731	3.22897	0.00124238	0.0157146
MGP_BALBcJ_G0025085__Entpd1	1501.55	0.799011	0.247639	3.22652	0.00125305	0.015837
MGP_BALBcJ_G0016956__Ltv1	678.746	0.462084	0.143293	3.22475	0.00126085	0.0159229
MGP_BALBcJ_G0022387__NA	3966.75	-0.268208	0.083188	-3.22411	0.00126363	0.0159453
MGP_BALBcJ_G0025033__Ifit2	259.995	-0.60856	0.188865	-3.2222	0.00127212	0.0160397
MGP_BALBcJ_G0019822__Zfp36l1	2255.62	0.53647	0.16654	3.22128	0.00127621	0.0160784
MGP_BALBcJ_G0024166__Rprd1a	792.966	-0.39189	0.121702	-3.22009	0.00128151	0.0161324
MGP_BALBcJ_G0027697__Wdr77	649.73	0.467517	0.145215	3.21948	0.00128424	0.0161539
MGP_BALBcJ_G0018140__Timd2	1007.06	-0.536558	0.166696	-3.21878	0.00128738	0.0161806
MGP_BALBcJ_G0016081__Arpc2	4857.18	0.307452	0.095551	3.21768	0.00129234	0.0162171
MGP_BALBcJ_G0024483__Pmaip1	87.6698	1.19466	0.37126	3.21786	0.00129152	0.0162171
MGP_BALBcJ_G0018815__Myo19	547.429	0.390458	0.121378	3.21686	0.00129601	0.0162503
MGP_BALBcJ_G0023907__Gtf2f1	1105.12	0.294318	0.0915378	3.21526	0.00130325	0.0163282
MGP_BALBcJ_G0018972__Arhgap23	551.73	0.391663	0.121949	3.21169	0.00131956	0.0165064
MGP_BALBcJ_G0026539__Btbd3	833.955	0.397479	0.123752	3.2119	0.00131859	0.0165064
MGP_BALBcJ_G0025587__St6galnac4	596.272	0.832954	0.259451	3.21045	0.00132527	0.0165648
MGP_BALBcJ_G0022085__Rangap1	1320.4	0.45839	0.14281	3.20979	0.00132832	0.0165899
MGP_BALBcJ_G0025787__Gorasp2	3542.58	0.329282	0.102609	3.20908	0.00133162	0.0166179
MGP_BALBcJ_G0024647__Dpp3	1900.87	0.302716	0.0943501	3.20844	0.00133459	0.0166419
MGP_BALBcJ_G0031726__Mill2	35.1394	-1.29642	0.404127	-3.20794	0.00133688	0.0166574
MGP_BALBcJ_G0027108__Pik3ca	2392.31	-0.269197	0.0839244	-3.20761	0.00133841	0.0166611
MGP_BALBcJ_G0035189__Pik3r4	970.424	-0.262009	0.0816883	-3.20743	0.00133928	0.0166611
MGP_BALBcJ_G0021116__A630023A22Rik	1809.32	-0.535252	0.166902	-3.20699	0.00134132	0.0166734
MGP_BALBcJ_G0030642__Tcaf1	1515.27	-0.337627	0.105321	-3.2057	0.00134732	0.0167349
MGP_BALBcJ_G0025838__Prkra	409.056	-0.390824	0.121945	-3.20491	0.00135105	0.0167681
MGP_BALBcJ_G0026476__Cpxm1	1020.45	1.7101	0.533738	3.20401	0.00135526	0.0168072
MGP_BALBcJ_G0020417__Ssr1	5306.49	0.405472	0.126581	3.20326	0.00135879	0.0168377
MGP_BALBcJ_G0019289__Kcnj2	1041.93	-0.795033	0.248281	-3.20215	0.00136406	0.0168899
MGP_BALBcJ_G0026507__Smox	2182.3	1.05909	0.330811	3.2015	0.00136715	0.0169149
MGP_BALBcJ_G0039915__NA	9.36199	3.62346	1.13238	3.19986	0.00137495	0.0169981
MGP_BALBcJ_G0026348__Ttbk2	515.275	-0.378759	0.118378	-3.19958	0.0013763	0.0170016
MGP_BALBcJ_G0025549__Prrx2	49.9262	1.60956	0.503216	3.19854	0.00138124	0.0170493
MGP_BALBcJ_G0033621__Msmo1	517.63	0.616403	0.192737	3.19815	0.00138311	0.017059
MGP_BALBcJ_G0021274__Rem2	59.3995	0.984648	0.30791	3.19784	0.00138461	0.0170643
MGP_BALBcJ_G0022268__Adcy6	2636.29	-0.456157	0.142683	-3.19699	0.00138871	0.0170883
MGP_BALBcJ_G0029129__H6pd	842.252	0.513169	0.160509	3.19713	0.00138801	0.0170883
MGP_BALBcJ_G0015205__A430057M04Rik	27.7131	1.36631	0.427501	3.19604	0.00139328	0.0171046
MGP_BALBcJ_G0028395__Dennd4c	1708.6	-0.276339	0.0864577	-3.19623	0.00139234	0.0171046
MGP_BALBcJ_G0032546__Chrdl2	2054.54	-1.58655	0.496343	-3.19647	0.00139121	0.0171046
MGP_BALBcJ_G0021944__Plec	4824.14	0.521985	0.163402	3.19449	0.00140077	0.0171825
MGP_BALBcJ_G0029777__Slc10a6	89.2854	1.45446	0.455331	3.19428	0.00140179	0.0171825
MGP_BALBcJ_G0006443__0610043K17Rik	153.369	-0.612768	0.191875	-3.19357	0.00140524	0.0172114
MGP_BALBcJ_G0030471__Cadps2	937.767	-0.364866	0.114278	-3.19279	0.00140905	0.0172449
MGP_BALBcJ_G0016085__NA	3666.76	-0.401719	0.125845	-3.19217	0.00141209	0.0172687
MGP_BALBcJ_G0017999__Pno1	826.622	0.427462	0.133939	3.19147	0.00141551	0.0172972
MGP_BALBcJ_G0016486__Zfp281	779.16	0.515446	0.161565	3.19033	0.00142109	0.0173266
MGP_BALBcJ_G0029563__9130230L23Rik	68.7879	0.880604	0.276025	3.19031	0.0014212	0.0173266
MGP_BALBcJ_G0030413__Ppp1r9a	1530.9	-0.515508	0.161571	-3.19059	0.00141982	0.0173266
MGP_BALBcJ_G0020533__Hk3	238.927	2.05172	0.643297	3.18939	0.00142575	0.0173687
MGP_BALBcJ_G0016308__Tnfrsf11a	3548.76	-0.594661	0.186482	-3.18883	0.00142848	0.0173876
MGP_BALBcJ_G0018885__Utp18	510.035	0.366789	0.11503	3.18863	0.00142949	0.0173876
MGP_BALBcJ_G0020509__Nfil3	1100.94	0.672077	0.210805	3.18815	0.00143186	0.0173973
MGP_BALBcJ_G0031944__Nfkbib	571.387	0.434312	0.13624	3.18784	0.00143339	0.0173973
MGP_BALBcJ_G0034813__Nrg4	108.83	-0.870861	0.273185	-3.1878	0.00143358	0.0173973
MGP_BALBcJ_G0018009__Aftph	3643.17	-0.287472	0.0901928	-3.1873	0.00143608	0.0174135
MGP_BALBcJ_G0027939__Mcoln2	124.39	1.8254	0.572828	3.18665	0.00143932	0.0174135
MGP_BALBcJ_G0029462__Afap1	2455.94	-0.419486	0.131622	-3.18706	0.00143729	0.0174135
MGP_BALBcJ_G0034781__Exph5	455.796	-0.879666	0.276038	-3.18676	0.00143878	0.0174135
MGP_BALBcJ_G0021734__Cmbl	134.946	-0.935569	0.293674	-3.18574	0.00144385	0.0174551
MGP_BALBcJ_G0024761__Pla2g16	1529.96	-0.459722	0.144318	-3.18547	0.00144517	0.0174577
MGP_BALBcJ_G0021135__Ccser2	3640.42	-0.376331	0.118168	-3.18471	0.00144898	0.0174904
MGP_BALBcJ_G0016588__Zbtb37	697.792	-0.351852	0.11051	-3.1839	0.00145304	0.0175089
MGP_BALBcJ_G0025213__Xpnpep1	2656.21	0.222349	0.0698387	3.18375	0.00145383	0.0175089
MGP_BALBcJ_G0036165__Kctd12b	365.167	-0.644947	0.202565	-3.18391	0.00145302	0.0175089
MGP_BALBcJ_G0029084__Tnfrsf1b	716.3	1.71833	0.539815	3.18318	0.00145666	0.0175297
MGP_BALBcJ_G0033976__Tk2	773.107	-0.28154	0.0884566	-3.1828	0.00145856	0.0175392
MGP_BALBcJ_G0029072__Pramef12	73.9224	-1.08633	0.341341	-3.18254	0.00145987	0.0175417
MGP_BALBcJ_G0002283__NA	179.531	-0.592251	0.186115	-3.18217	0.00146175	0.017551
MGP_BALBcJ_G0033637__Psd3	1094.65	-0.369713	0.116197	-3.18177	0.0014638	0.0175623
MGP_BALBcJ_G0029407__Mrpl33	478.459	0.37125	0.116726	3.18052	0.00147009	0.0176244
MGP_BALBcJ_G0023487__Zfp955b	290.933	-0.407391	0.128136	-3.17936	0.00147598	0.0176817
MGP_BALBcJ_G0021674__Nipbl	3263.72	-0.282089	0.08874	-3.17882	0.00147876	0.0177016
MGP_BALBcJ_G0020622__Ptch1	764.59	-0.555645	0.17482	-3.17839	0.00148095	0.0177144
MGP_BALBcJ_G0020420__Dsp	1265.14	0.498765	0.156952	3.17782	0.00148387	0.0177226
MGP_BALBcJ_G0028387__Bnc2	33.2399	1.40365	0.441695	3.17787	0.00148363	0.0177226
MGP_BALBcJ_G0032924__Cdr2	178.679	0.904401	0.284628	3.17748	0.0014856	0.0177299
MGP_BALBcJ_G0034677__Hyou1	4770.16	0.966007	0.304239	3.17515	0.00149758	0.0178594
MGP_BALBcJ_G0021275__Prmt5	911.534	0.407248	0.128299	3.1742	0.00150249	0.0179045
MGP_BALBcJ_G0028546__Kti12	301.909	0.495319	0.156143	3.17222	0.0015128	0.0180138
MGP_BALBcJ_G0017969__Tbrg4	958.365	0.483941	0.152681	3.16961	0.00152643	0.0181593
MGP_BALBcJ_G0018581__Spns2	5752.1	-0.396405	0.125071	-3.16944	0.00152731	0.0181593
MGP_BALBcJ_G0030390__Fry	334.946	-0.419258	0.132331	-3.16825	0.00153359	0.0182203
MGP_BALBcJ_G0019612__Prkar2b	596.807	-0.821324	0.259299	-3.16748	0.00153765	0.0182549
MGP_BALBcJ_G0016422__Pik3c2b	751.677	-0.477443	0.150754	-3.16704	0.00153999	0.0182615
MGP_BALBcJ_G0020997__Zswim8	4532.77	0.195766	0.0618154	3.16694	0.00154051	0.0182615
MGP_BALBcJ_G0034121__Tmem170	400.077	-0.348425	0.110054	-3.16595	0.00154577	0.0183101
MGP_BALBcJ_G0032519__Capn5	1072.31	-0.557009	0.175967	-3.16542	0.0015486	0.0183299
MGP_BALBcJ_G0025243__Ablim1	1820.62	-0.623588	0.197099	-3.16383	0.00155709	0.0184167
MGP_BALBcJ_G0026138__Cry2	454.044	-0.891034	0.281726	-3.16277	0.00156277	0.01847
MGP_BALBcJ_G0015759__Pcmtd1	3437.69	-0.337381	0.106712	-3.1616	0.00156902	0.0184888
MGP_BALBcJ_G0020757__Ssbp2	243.027	-0.507112	0.160374	-3.16205	0.00156663	0.0184888
MGP_BALBcJ_G0022639__Dnajb11	2355.63	0.518933	0.164131	3.16171	0.00156846	0.0184888
MGP_BALBcJ_G0033039__Hsd3b7	82.2061	0.706361	0.223389	3.16202	0.00156678	0.0184888
MGP_BALBcJ_G0020705__Nkd2	134.233	1.79834	0.569135	3.15979	0.00157886	0.0185815
MGP_BALBcJ_G0029250__Fzd1	406.674	0.607564	0.192284	3.15972	0.00157923	0.0185815
MGP_BALBcJ_G0017790__Spryd4	261.921	0.457534	0.144873	3.15818	0.00158756	0.0186656
MGP_BALBcJ_G0018246__Gm12216	9.41541	-2.24147	0.710054	-3.15676	0.0015953	0.0187308
MGP_BALBcJ_G0031392__Cdkn1b	1863.45	-0.474539	0.150326	-3.15673	0.00159547	0.0187308
MGP_BALBcJ_G0018272__G3bp1	2279.6	0.472747	0.149795	3.15596	0.00159971	0.0187667
MGP_BALBcJ_G0017183__Gcc2	1114.16	-0.265309	0.0840888	-3.15511	0.00160439	0.0187937
MGP_BALBcJ_G0026600__Zfp120	650.316	-0.374326	0.118638	-3.1552	0.00160388	0.0187937
MGP_BALBcJ_G0028966__Hspg2	6052.39	0.491836	0.155907	3.15467	0.0016068	0.0188081
MGP_BALBcJ_G0016843__Dusp10	83.9395	1.27878	0.40554	3.15328	0.00161448	0.0188562
MGP_BALBcJ_G0017379__2610008E11Rik	546.05	-0.521689	0.16544	-3.15334	0.00161415	0.0188562
MGP_BALBcJ_G0032326__Mtmr10	1406.38	-0.305338	0.0968256	-3.15348	0.00161336	0.0188562
MGP_BALBcJ_G0028362__Cdk5rap2	1440.21	-0.496057	0.157346	-3.15265	0.00161794	0.0188827
MGP_BALBcJ_G0024516__Elac1	535.504	-0.459456	0.145791	-3.15147	0.0016245	0.0189175
MGP_BALBcJ_G0029869__Pus1	587.311	0.38537	0.122267	3.15186	0.00162232	0.0189175
MGP_BALBcJ_G0033694__Lrrc25	151.101	1.48151	0.47008	3.15162	0.00162365	0.0189175
MGP_BALBcJ_G0022024__Lgals1	2466.38	1.01179	0.321197	3.15006	0.00163236	0.0189951
MGP_BALBcJ_G0019421__Eif4a3	1385.22	0.281815	0.0895022	3.14869	0.00164005	0.0190705
MGP_BALBcJ_G0017240__Ddx21	2303.81	0.49505	0.157276	3.14765	0.00164589	0.0191245
MGP_BALBcJ_G0018324__Hist3h2a	444.628	-0.518983	0.164925	-3.14678	0.00165078	0.0191672
MGP_BALBcJ_G0033240__Tnni2	17.9016	1.44197	0.458609	3.14423	0.00166527	0.0193212
MGP_BALBcJ_G0007321__Gm26532	257.999	1.1784	0.374891	3.14332	0.00167043	0.0193555
MGP_BALBcJ_G0029164__Nphp4	15.476	1.70469	0.54233	3.14328	0.00167066	0.0193555
MGP_BALBcJ_G0018900__Mycbpap	90.1123	-0.95182	0.302855	-3.14282	0.00167327	0.0193715
MGP_BALBcJ_G0034074__Nob1	505.881	0.421106	0.134028	3.14193	0.00167835	0.0194162
MGP_BALBcJ_G0019285__Abca6	119.063	-1.27815	0.406852	-3.14155	0.00168054	0.0194273
MGP_BALBcJ_G0033460__Plpp5	780.486	0.356846	0.113602	3.14119	0.0016826	0.019437
MGP_BALBcJ_G0027736__Ampd2	887.667	0.539094	0.171637	3.1409	0.00168428	0.0194422
MGP_BALBcJ_G0025224__Adra2a	15.9614	-1.56624	0.498925	-3.13923	0.0016939	0.019539
MGP_BALBcJ_G0028142__Sigmar1	772.721	0.442911	0.141135	3.13822	0.00169979	0.0195927
MGP_BALBcJ_G0018923__Slc35b1	1975.18	0.437993	0.139767	3.13374	0.00172596	0.0198799
MGP_BALBcJ_G0015279__D330041H03Rik	258.497	-0.616667	0.196872	-3.13232	0.00173429	0.0199469
MGP_BALBcJ_G0035814__G6pdx	4197.78	0.362955	0.115872	3.13237	0.00173401	0.0199469
MGP_BALBcJ_G0030100__NA	579.78	0.68673	0.219276	3.1318	0.00173739	0.019968
MGP_BALBcJ_G0026949__NA	110.597	-1.38942	0.443699	-3.13146	0.00173942	0.0199768
MGP_BALBcJ_G0017819__Dgka	1361.12	-0.49788	0.15901	-3.13113	0.00174136	0.0199846
MGP_BALBcJ_G0021862__Asap1	2907.99	-0.732301	0.2339	-3.13083	0.00174316	0.0199908
MGP_BALBcJ_G0028717__Hpcal4	325.21	1.11684	0.356753	3.13056	0.00174474	0.0199945
MGP_BALBcJ_G0030862__Retsat	894.584	-0.650371	0.207786	-3.13	0.00174808	0.0200183
MGP_BALBcJ_G0021009__Comtd1	227.248	0.566209	0.180914	3.12972	0.00174972	0.0200226
MGP_BALBcJ_G0019460__Mafg	2919.55	0.305921	0.0978784	3.12552	0.00177491	0.0202962
MGP_BALBcJ_G0026471__Snrpb	1869.62	0.290241	0.0929008	3.12421	0.00178285	0.0203429
MGP_BALBcJ_G0026673__Mapre1	3185.73	0.207523	0.0664189	3.12445	0.00178138	0.0203429
MGP_BALBcJ_G0031624__Zfp551	49.8288	-0.867274	0.277595	-3.12425	0.0017826	0.0203429
MGP_BALBcJ_G0020850__Mast4	5236.65	-0.531994	0.17032	-3.1235	0.00178712	0.0203765
MGP_BALBcJ_G0022424__Slx4	476.052	0.366247	0.117271	3.12309	0.00178964	0.0203765
MGP_BALBcJ_G0031701__Ptgir	47.8129	1.20658	0.386321	3.12326	0.00178862	0.0203765
MGP_BALBcJ_G0024762__Lgals12	474.164	-0.905621	0.290183	-3.12086	0.00180325	0.0205167
MGP_BALBcJ_G0031024__Fbln2	3362.3	0.648249	0.207733	3.12059	0.00180492	0.0205209
MGP_BALBcJ_G0019151__Rdm1	211.953	-0.626395	0.200744	-3.12037	0.00180623	0.0205211
MGP_BALBcJ_G0028811__Fam167b	72.2189	0.931393	0.298572	3.11949	0.00181166	0.020568
MGP_BALBcJ_G0005412__Gm16984	14.6873	-1.61564	0.517957	-3.11926	0.00181307	0.0205693
MGP_BALBcJ_G0020374__Gmds	1062.52	0.319824	0.102575	3.11796	0.00182109	0.0205972
MGP_BALBcJ_G0021422__Fdft1	901.93	-0.352979	0.113185	-3.1186	0.00181711	0.0205972
MGP_BALBcJ_G0028646__Ptprf	11554.6	-0.32876	0.105438	-3.11803	0.00182066	0.0205972
MGP_BALBcJ_G0031174__Wnt5b	1983.34	-0.684586	0.219573	-3.11781	0.00182203	0.0205972
MGP_BALBcJ_G0035001__Rsl24d1	463.272	0.327721	0.105108	3.11794	0.00182121	0.0205972
MGP_BALBcJ_G0036894__Peg13	785.149	-0.48194	0.154608	-3.11717	0.00182599	0.0206273
MGP_BALBcJ_G0016247__Per2	810.984	-0.820336	0.263545	-3.1127	0.00185385	0.0209272
MGP_BALBcJ_G0018804__Synrg	1460.9	-0.35157	0.112955	-3.11248	0.00185524	0.0209279
MGP_BALBcJ_G0034204__Cdt1	114.418	0.755603	0.242792	3.11214	0.00185734	0.0209367
MGP_BALBcJ_G0016681__Fcgr3	896.869	0.865966	0.278391	3.11061	0.00186699	0.0210305
MGP_BALBcJ_G0015527__Gm13648	357.603	-0.66216	0.213017	-3.10848	0.00188052	0.0211528
MGP_BALBcJ_G0018882__Tom1l1	1145	-0.288934	0.0929481	-3.10855	0.0018801	0.0211528
MGP_BALBcJ_G0017459__Sf3a2	795.662	0.374405	0.120511	3.10681	0.0018912	0.0212543
MGP_BALBcJ_G0032693__Trim6	422.048	-0.51363	0.165333	-3.10665	0.00189222	0.0212543
MGP_BALBcJ_G0027350__Nes	275.158	0.7271	0.234147	3.10531	0.00190079	0.0213204
MGP_BALBcJ_G0034059__Cdh1	9595.2	0.366558	0.118038	3.10541	0.00190012	0.0213204
MGP_BALBcJ_G0023214__Zfp945	568.88	-0.431755	0.139101	-3.10389	0.00190991	0.0214075
MGP_BALBcJ_G0032907__2610020H08Rik	69.9016	-0.885811	0.285477	-3.10291	0.00191627	0.0214635
MGP_BALBcJ_G0035053__Phip	2139.69	-0.388393	0.125182	-3.10262	0.00191815	0.0214695
MGP_BALBcJ_G0016797__Cnst	1917.83	-0.831597	0.268211	-3.10054	0.00193171	0.021606
MGP_BALBcJ_G0023599__Ddx39b	3300.1	0.250575	0.0808242	3.10024	0.00193362	0.0216121
MGP_BALBcJ_G0028283__Tmem38b	333.451	0.678348	0.218978	3.09779	0.00194968	0.0217762
MGP_BALBcJ_G0021088__Dph3	606.675	0.302519	0.097677	3.09714	0.00195401	0.0218092
MGP_BALBcJ_G0016566__Soat1	561.587	1.09885	0.355012	3.09525	0.00196647	0.0219039
MGP_BALBcJ_G0022690__Pigz	11.689	-1.74844	0.56485	-3.09542	0.00196537	0.0219039
MGP_BALBcJ_G0034265__Slc35f3	145.069	-0.828564	0.267691	-3.09522	0.00196664	0.0219039
MGP_BALBcJ_G0019478__Sectm1b	2790.62	1.53629	0.49642	3.09475	0.00196981	0.0219238
MGP_BALBcJ_G0021220__Apex1	785.305	0.426417	0.137908	3.09204	0.00198789	0.0220983
MGP_BALBcJ_G0024026__NA	321.529	0.38594	0.12482	3.09198	0.00198827	0.0220983
MGP_BALBcJ_G0020948__Ptprg	989.63	0.515446	0.166727	3.09155	0.00199112	0.0221144
MGP_BALBcJ_G0028587__Cyp4b1	287.986	-0.519027	0.167909	-3.09112	0.00199401	0.022131
MGP_BALBcJ_G0033849__Calr	30860.7	0.434302	0.14051	3.0909	0.00199548	0.0221318
MGP_BALBcJ_G0026134__Gyltl1b	761.003	-0.469949	0.152093	-3.08988	0.00200234	0.0221924
MGP_BALBcJ_G0029022__Szrd1	2081.01	0.257772	0.0834576	3.08865	0.00201065	0.0222689
MGP_BALBcJ_G0020505__Gadd45g	467.343	0.775174	0.251083	3.08733	0.00201966	0.0223531
MGP_BALBcJ_G0026340__Ganc	624.009	-0.507143	0.164282	-3.08702	0.00202174	0.0223605
MGP_BALBcJ_G0002375__NA	8.27165	2.43127	0.787881	3.08584	0.00202977	0.022384
MGP_BALBcJ_G0024569__Tshz1	926.761	-0.393925	0.127662	-3.08567	0.00203093	0.022384
MGP_BALBcJ_G0031503__Tarm1	25.9324	4.92802	1.59693	3.08593	0.00202916	0.022384
MGP_BALBcJ_G0033726__Dda1	954.646	0.260184	0.0843043	3.08626	0.00202695	0.022384
MGP_BALBcJ_G0035241__Sema3f	1172.37	0.612472	0.19847	3.08597	0.00202889	0.022384
MGP_BALBcJ_G0022629__Tmem41a	311.963	-0.517478	0.167746	-3.08489	0.00203626	0.0224271
MGP_BALBcJ_G0014271__NA	14.8852	1.82623	0.592372	3.08292	0.00204981	0.0225607
MGP_BALBcJ_G0016372__Mcm6	147.785	0.948874	0.307928	3.08148	0.00205976	0.022631
MGP_BALBcJ_G0019304__Gprc5c	850.3	-0.466875	0.151497	-3.08174	0.00205795	0.022631
MGP_BALBcJ_G0030907__Mthfd2	95.1531	1.41213	0.458278	3.08137	0.00206048	0.022631
MGP_BALBcJ_G0020169__Heatr1	904.101	0.748162	0.242882	3.08035	0.00206757	0.0226695
MGP_BALBcJ_G0024335__Nr3c1	2731.44	-0.444881	0.144417	-3.08053	0.00206636	0.0226695
MGP_BALBcJ_G0033633__Naf1	104.25	0.565533	0.1836	3.08025	0.00206828	0.0226695
MGP_BALBcJ_G0032749__Taf10	1010.05	0.314293	0.102048	3.07986	0.00207101	0.0226838
MGP_BALBcJ_G0025735__Rbms1	2364.82	0.455406	0.147955	3.078	0.00208394	0.0228097
MGP_BALBcJ_G0026137__Mapk8ip1	391.622	-0.632494	0.205548	-3.07711	0.00209021	0.0228368
MGP_BALBcJ_G0030491__Arf5	1446.49	0.232049	0.075406	3.07733	0.00208866	0.0228368
MGP_BALBcJ_G0031118__Atp2b2	75.3113	-1.37923	0.448236	-3.07703	0.00209075	0.0228368
MGP_BALBcJ_G0025490__Col5a1	2502.42	0.854511	0.277828	3.07568	0.00210022	0.0229245
MGP_BALBcJ_G0019406__Usp36	1044.43	0.358517	0.116576	3.0754	0.00210219	0.0229303
MGP_BALBcJ_G0026491__Slc4a11	62.9087	1.23485	0.401634	3.07456	0.00210811	0.022979
MGP_BALBcJ_G0020444__Edn1	110.654	-0.776305	0.252519	-3.07425	0.00211034	0.0229864
MGP_BALBcJ_G0021642__Tmtc4	683.481	-0.450877	0.146672	-3.07406	0.00211169	0.0229864
MGP_BALBcJ_G0029891__2900026A02Rik	2035.74	-0.652457	0.212263	-3.07382	0.0021134	0.0229892
MGP_BALBcJ_G0025558__Hmcn2	394.746	-1.29763	0.422267	-3.07301	0.00211914	0.0230359
MGP_BALBcJ_G0025748__Cobll1	1647.46	-0.38043	0.123822	-3.07239	0.00212349	0.0230673
MGP_BALBcJ_G0029515__Slit2	351.217	1.20076	0.390869	3.07203	0.00212611	0.02308
MGP_BALBcJ_G0022714__Rubcn	1875.62	-0.385022	0.125345	-3.0717	0.00212842	0.0230892
MGP_BALBcJ_G0017473__Sgta	1905.73	0.222456	0.0724572	3.07018	0.00213932	0.0231796
MGP_BALBcJ_G0027323__Glt28d2	210.788	-0.451968	0.147215	-3.07013	0.00213968	0.0231796
MGP_BALBcJ_G0020431__Pak1ip1	814.033	0.453509	0.147762	3.06918	0.00214647	0.0232373
MGP_BALBcJ_G0005683__Gm16194	9.45773	5.12783	1.67097	3.06877	0.00214939	0.023253
MGP_BALBcJ_G0024593__1810055G02Rik	377.021	0.552733	0.180212	3.06714	0.00216121	0.023365
MGP_BALBcJ_G0002392__Trac	21.1895	-3.20334	1.04496	-3.06552	0.00217292	0.0234483
MGP_BALBcJ_G0006099__4632415L05Rik	440.629	-0.416433	0.135855	-3.06526	0.00217479	0.0234483
MGP_BALBcJ_G0015826__Col9a1	2343.23	-1.64378	0.536259	-3.06528	0.00217467	0.0234483
MGP_BALBcJ_G0020401__Pxdc1	223.581	0.871327	0.284259	3.06526	0.00217483	0.0234483
MGP_BALBcJ_G0018111__Atp10b	644.824	-0.947272	0.309073	-3.06488	0.00217755	0.0234616
MGP_BALBcJ_G0024294__Pcdhb19	93.1579	-0.569787	0.185943	-3.06432	0.00218165	0.0234742
MGP_BALBcJ_G0033655__Atp13a1	1959.35	0.284202	0.0927455	3.06432	0.00218168	0.0234742
MGP_BALBcJ_G0020555__B4galt7	528.913	0.447917	0.146195	3.06383	0.00218522	0.0234961
MGP_BALBcJ_G0023217__Zfp40	259.995	-0.564907	0.184391	-3.06363	0.00218669	0.0234961
MGP_BALBcJ_G0032846__Adm	137.614	0.863494	0.281906	3.06306	0.00219086	0.023525
MGP_BALBcJ_G0020642__Zfp369	526.152	-0.423002	0.138132	-3.06231	0.00219633	0.0235678
MGP_BALBcJ_G0039479__Gm24357	120.367	0.784365	0.256159	3.06203	0.00219842	0.0235743
MGP_BALBcJ_G0024186__Lims2	379.948	-0.46596	0.152186	-3.06177	0.00220032	0.0235787
MGP_BALBcJ_G0028529__Podn	387.422	-0.853986	0.2791	-3.05979	0.00221496	0.0237195
MGP_BALBcJ_G0017609__Cradd	110.766	0.669725	0.218905	3.05943	0.00221759	0.0237248
MGP_BALBcJ_G0023302__Telo2	480.551	0.348257	0.113835	3.05931	0.00221845	0.0237248
MGP_BALBcJ_G0016803__Coq8a	1394.96	-0.680865	0.222704	-3.05726	0.0022337	0.0238557
MGP_BALBcJ_G0029315__Nos3	425.668	0.562588	0.184005	3.05746	0.00223222	0.0238557
MGP_BALBcJ_G0017892__NA	1236.81	-0.477644	0.156259	-3.05674	0.00223759	0.023867
MGP_BALBcJ_G0032783__Olfml1	67.2684	-1.08135	0.353763	-3.05672	0.00223776	0.023867
MGP_BALBcJ_G0027912__Gbp3	466.603	-0.605969	0.198274	-3.05622	0.00224148	0.0238906
MGP_BALBcJ_G0021438__Kif13b	2797.26	-0.505341	0.165376	-3.05572	0.00224524	0.0239146
MGP_BALBcJ_G0021278__4931414P19Rik	107.546	-0.724363	0.237117	-3.05487	0.00225155	0.0239496
MGP_BALBcJ_G0026698__Chmp4b	4563.26	0.21835	0.0714736	3.05497	0.00225082	0.0239496
MGP_BALBcJ_G0031239__Phb2	2143.9	0.255385	0.0836317	3.05369	0.00226048	0.0240284
MGP_BALBcJ_G0015984__Aox3	419.764	-1.38255	0.453002	-3.05198	0.0022734	0.0241334
MGP_BALBcJ_G0019455__Alyref	553.446	0.438639	0.143714	3.05217	0.00227193	0.0241334
MGP_BALBcJ_G0020501__Cks2	64.2933	0.783442	0.256732	3.05159	0.00227634	0.0241484
MGP_BALBcJ_G0025246__Atrnl1	1831.82	-0.335395	0.109928	-3.05103	0.00228058	0.0241772
MGP_BALBcJ_G0027853__Ostc	1382.25	0.583003	0.191109	3.05063	0.00228359	0.0241929
MGP_BALBcJ_G0026522__Trmt6	568.451	0.392474	0.128712	3.04925	0.00229417	0.0242888
MGP_BALBcJ_G0000010__Ighm	987.461	-2.37542	0.779514	-3.04731	0.00230899	0.0244293
MGP_BALBcJ_G0034870__Adpgk	459.489	0.497477	0.163298	3.04644	0.00231571	0.0244841
MGP_BALBcJ_G0028943__Id3	273.404	0.627669	0.20607	3.0459	0.00231986	0.0245116
MGP_BALBcJ_G0034035__Cenpt	252.068	0.487205	0.160054	3.044	0.00233458	0.0246507
MGP_BALBcJ_G0022673__Opa1	2196.63	-0.170758	0.0561039	-3.04361	0.00233761	0.0246663
MGP_BALBcJ_G0019595__Sntg2	52.5777	-0.880377	0.289333	-3.04278	0.00234405	0.0247178
MGP_BALBcJ_G0017707__Dyrk2	560.587	-0.379675	0.124895	-3.03995	0.00236619	0.0249181
MGP_BALBcJ_G0032561__Fam168a	1080.08	-0.274859	0.0904155	-3.03996	0.00236613	0.0249181
MGP_BALBcJ_G0034408__Fdx1l	375.749	0.371535	0.122242	3.03934	0.00237095	0.0249517
MGP_BALBcJ_G0030317__Kdelr2	2218.75	0.404994	0.133283	3.0386	0.00237681	0.0249967
MGP_BALBcJ_G0031625__Zfp606	421.64	-0.380907	0.125507	-3.03493	0.0024059	0.0252858
MGP_BALBcJ_G0026414__Atp8b4	81.649	1.57778	0.519937	3.03457	0.00240881	0.0252996
MGP_BALBcJ_G0035422__Sec22c	422.601	-0.38337	0.126392	-3.03318	0.00241989	0.0253992
MGP_BALBcJ_G0021155__Gpr137c	324.805	-1.03524	0.341415	-3.03219	0.00242789	0.0254663
MGP_BALBcJ_G0028925__Ncmap	14.5416	1.70691	0.563646	3.02834	0.00245899	0.0257754
MGP_BALBcJ_G0017919__Tbc1d10a	616.563	0.451174	0.149051	3.02698	0.00247008	0.0258501
MGP_BALBcJ_G0021577__Dach1	89.503	-0.830273	0.27428	-3.0271	0.00246909	0.0258501
MGP_BALBcJ_G0028767__Psmb2	2205.88	0.194273	0.0641828	3.02687	0.002471	0.0258501
MGP_BALBcJ_G0033110__Adam12	287.061	0.962358	0.318108	3.02526	0.0024842	0.025971
MGP_BALBcJ_G0032514__Clns1a	862.975	0.262182	0.0866736	3.02493	0.00248687	0.0259818
MGP_BALBcJ_G0018485__Cd68	1463.66	0.998842	0.33049	3.02231	0.00250855	0.0261908
MGP_BALBcJ_G0023235__Flywch1	816.49	-0.316146	0.104611	-3.02211	0.00251018	0.0261908
MGP_BALBcJ_G0030958__Asprv1	125.008	1.27618	0.422402	3.02124	0.00251738	0.0262486
MGP_BALBcJ_G0019212__Nsf	1078.41	0.262437	0.0868724	3.02095	0.00251982	0.0262569
MGP_BALBcJ_G0022998__Mrap	347.528	1.0533	0.348709	3.02056	0.00252305	0.0262732
MGP_BALBcJ_G0032554__Ucp3	8290.09	-0.718505	0.237933	-3.01977	0.00252963	0.0263245
MGP_BALBcJ_G0004717__NA	17.4266	2.13644	0.707803	3.01841	0.00254106	0.026426
MGP_BALBcJ_G0029928__Oasl1	133.363	1.05547	0.349777	3.01754	0.00254832	0.0264841
MGP_BALBcJ_G0022432__Glis2	144.851	0.673014	0.223114	3.01645	0.0025575	0.0265622
MGP_BALBcJ_G0017305__Mif	1075.94	0.273628	0.0907188	3.01622	0.00255946	0.0265651
MGP_BALBcJ_G0017954__Ykt6	2613.94	0.230493	0.0764279	3.01582	0.00256284	0.0265828
MGP_BALBcJ_G0035900__Ophn1	1991.19	-0.483681	0.160435	-3.01481	0.00257143	0.0266544
MGP_BALBcJ_G0026785__Chd6	1898.51	-0.299017	0.0992041	-3.01416	0.00257694	0.0266941
MGP_BALBcJ_G0016730__Tagln2	2241.11	0.895138	0.297093	3.01299	0.00258691	0.0267473
MGP_BALBcJ_G0018734__Wsb1	1699.7	0.529062	0.175595	3.01296	0.00258714	0.0267473
MGP_BALBcJ_G0021517__Fndc3a	7528.27	-0.231961	0.076984	-3.01311	0.00258587	0.0267473
MGP_BALBcJ_G0022070__Tnrc6b	2695.34	-0.270553	0.0898267	-3.01194	0.00259583	0.0268021
MGP_BALBcJ_G0027012__Pcmtd2	2320.05	-0.406177	0.134853	-3.01201	0.00259527	0.0268021
MGP_BALBcJ_G0017490__Cactin	710.453	0.31522	0.104707	3.01049	0.00260826	0.0268955
MGP_BALBcJ_G0019106__Dhx58	304.745	0.439448	0.145967	3.01061	0.00260724	0.0268955
MGP_BALBcJ_G0035418__Trak1	2688.61	-0.24213	0.0804409	-3.01004	0.00261217	0.0269007
MGP_BALBcJ_G0035537__Bcor	1219.18	-0.423368	0.140647	-3.01014	0.00261128	0.0269007
MGP_BALBcJ_G0019812__Plek2	55.9198	0.801861	0.266415	3.00982	0.00261406	0.0269028
MGP_BALBcJ_G0017959__Ddx56	819.798	0.351404	0.116797	3.00867	0.00262398	0.0269598
MGP_BALBcJ_G0027448__S100a4	6.93626	2.78149	0.92452	3.00858	0.00262471	0.0269598
MGP_BALBcJ_G0033060__Armc5	469.122	0.305492	0.101535	3.00873	0.00262346	0.0269598
MGP_BALBcJ_G0028062__Pnisr	5443.31	-0.253476	0.084286	-3.00733	0.00263554	0.0270536
MGP_BALBcJ_G0010638__NA	166.765	0.482233	0.160386	3.0067	0.00264104	0.0270842
MGP_BALBcJ_G0021949__Oplah	2028.78	-0.733193	0.243887	-3.00628	0.00264465	0.0270842
MGP_BALBcJ_G0023808__Taf8	604.749	-0.28903	0.096146	-3.00615	0.00264577	0.0270842
MGP_BALBcJ_G0023883__Uhrf1	83.0794	1.34785	0.448408	3.00587	0.00264826	0.0270842
MGP_BALBcJ_G0025629__Ggta1	2828.27	0.476859	0.158646	3.00581	0.00264878	0.0270842
MGP_BALBcJ_G0032125__Siglece	91.3034	0.991698	0.329865	3.00637	0.00264384	0.0270842
MGP_BALBcJ_G0021122__Fam35a	171.546	-0.539307	0.179449	-3.00535	0.00265278	0.0271077
MGP_BALBcJ_G0025225__Gpam	3171.11	-0.296876	0.0988025	-3.00475	0.00265803	0.0271437
MGP_BALBcJ_G0034259__Sipa1l2	243.514	0.776881	0.258654	3.00355	0.00266849	0.027233
MGP_BALBcJ_G0016895__Irf6	2149	-0.41987	0.13986	-3.00207	0.00268151	0.0273307
MGP_BALBcJ_G0032506__Kctd21	274.971	-0.484592	0.161414	-3.00216	0.0026807	0.0273307
MGP_BALBcJ_G0019729__Pole2	75.831	1.40559	0.468327	3.00129	0.00268838	0.0273831
MGP_BALBcJ_G0029814__NA	21.5194	-1.23343	0.410995	-3.00109	0.00269016	0.0273837
MGP_BALBcJ_G0031694__Ap2s1	1505.63	0.260259	0.0867473	3.00019	0.00269811	0.0274469
MGP_BALBcJ_G0016098__Cyp27a1	218.283	-1.00178	0.333969	-2.99961	0.00270322	0.0274704
MGP_BALBcJ_G0020373__Foxc1	1146.7	0.746676	0.248949	2.99931	0.0027059	0.0274704
MGP_BALBcJ_G0024743__Fkbp2	1213.37	0.245646	0.0819051	2.99915	0.00270735	0.0274704
MGP_BALBcJ_G0029701__Rassf6	770.326	-0.567747	0.189287	-2.9994	0.00270515	0.0274704
MGP_BALBcJ_G0017209__Slc29a3	2379.52	-0.403545	0.134586	-2.99842	0.00271379	0.0275181
MGP_BALBcJ_G0025562__Exosc2	342.149	0.454928	0.15177	2.99747	0.00272229	0.0275867
MGP_BALBcJ_G0035218__Manf	2941.11	0.751922	0.250968	2.99609	0.00273464	0.0276941
MGP_BALBcJ_G0031691__Arhgap35	4860.68	-0.394586	0.131721	-2.99562	0.00273891	0.0277197
MGP_BALBcJ_G0030257__A430033K04Rik	175.971	-0.51111	0.170655	-2.995	0.00274447	0.0277582
MGP_BALBcJ_G0028176__Fam214b	988.216	0.294739	0.0984715	2.99314	0.00276125	0.0279101
MGP_BALBcJ_G0018010__Lgalsl	2034.22	-0.557112	0.186197	-2.99207	0.00277096	0.0279904
MGP_BALBcJ_G0023201__Zfp760	700.451	-0.460154	0.153804	-2.99183	0.00277314	0.0279946
MGP_BALBcJ_G0000095__Igkv1-135	585.081	1.17247	0.39197	2.99121	0.00277872	0.028033
MGP_BALBcJ_G0033479__Rab11fip1	1734.3	-0.261932	0.0875791	-2.99081	0.00278241	0.0280346
MGP_BALBcJ_G0034138__Cdyl2	440.385	-0.441656	0.147666	-2.99091	0.00278146	0.0280346
MGP_BALBcJ_G0017479__Eef2	49267.2	-0.286806	0.0959332	-2.98964	0.00279307	0.0281242
MGP_BALBcJ_G0021035__Arf4	4856.26	0.290877	0.0973389	2.98829	0.0028054	0.0282304
MGP_BALBcJ_G0029851__Crlf2	198.102	0.433871	0.145211	2.98787	0.00280931	0.0282362
MGP_BALBcJ_G0032742__Hpx	11.1292	1.94677	0.651562	2.98784	0.00280955	0.0282362
MGP_BALBcJ_G0034823__Hmg20a	1090.81	-0.287148	0.0961668	-2.98594	0.00282712	0.0283948
MGP_BALBcJ_G0001707__NA	68.9201	-0.834332	0.279792	-2.98197	0.00286397	0.0287285
MGP_BALBcJ_G0021174__Atg14	752.547	-0.340715	0.114254	-2.98207	0.00286304	0.0287285
MGP_BALBcJ_G0024983__Vldlr	379.11	-0.573776	0.192521	-2.98033	0.00287939	0.0288557
MGP_BALBcJ_G0035460__Fyco1	2596	-0.343215	0.115164	-2.98023	0.00288029	0.0288557
MGP_BALBcJ_G0024070__Foxn2	735.947	0.456119	0.153123	2.97877	0.00289409	0.0289757
MGP_BALBcJ_G0020504__Sema4d	2554.37	0.303961	0.102053	2.97845	0.00289706	0.0289871
MGP_BALBcJ_G0036241__Hccs	448.777	0.432075	0.145145	2.97684	0.00291234	0.0291216
MGP_BALBcJ_G0020400__Slc22a23	1367.48	-0.414191	0.139167	-2.97622	0.0029183	0.0291627
MGP_BALBcJ_G0018499__Nlgn2	822.613	0.413461	0.138975	2.97507	0.00292926	0.029217
MGP_BALBcJ_G0028502__Dhcr24	288.612	0.623136	0.20944	2.97524	0.00292755	0.029217
MGP_BALBcJ_G0028923__Clic4	4017.57	0.600239	0.201739	2.97532	0.00292683	0.029217
MGP_BALBcJ_G0030140__Limk1	275.493	0.482915	0.162348	2.97456	0.00293407	0.0292466
MGP_BALBcJ_G0025100__Rrp12	444.401	0.654728	0.220297	2.97203	0.00295836	0.0294517
MGP_BALBcJ_G0027622__Hmgcs2	216.938	-1.05382	0.354564	-2.97216	0.00295717	0.0294517
MGP_BALBcJ_G0029550__Wdr19	427.93	-0.48937	0.16467	-2.97182	0.00296041	0.0294535
MGP_BALBcJ_G0031125__Syn2	225.757	0.848762	0.285634	2.9715	0.00296345	0.0294653
MGP_BALBcJ_G0027397__Muc1	24614.5	-0.413547	0.139231	-2.97023	0.0029758	0.0295696
MGP_BALBcJ_G0019004__Zpbp2	18.575	-1.5245	0.513389	-2.96948	0.00298306	0.0295953
MGP_BALBcJ_G0026392__AA467197	10.6419	2.28468	0.769332	2.9697	0.00298093	0.0295953
MGP_BALBcJ_G0031244__Eno2	123.689	0.724289	0.243919	2.96938	0.00298399	0.0295953
MGP_BALBcJ_G0016857__Rrp15	323.24	0.514408	0.173271	2.9688	0.00298968	0.0296267
MGP_BALBcJ_G0018928__Zfp652	1642.18	-0.2901	0.0977268	-2.96848	0.00299277	0.0296267
MGP_BALBcJ_G0021811__Samd12	37.2294	1.08936	0.366973	2.96851	0.00299252	0.0296267
MGP_BALBcJ_G0030183__Sh2b2	204.684	1.00818	0.339861	2.96644	0.00301271	0.0298056
MGP_BALBcJ_G0035348__Epm2aip1	2581.47	-0.312914	0.10552	-2.96544	0.00302246	0.0298833
MGP_BALBcJ_G0020554__Tmed9	3929.08	0.293001	0.0988215	2.96495	0.00302728	0.0298937
MGP_BALBcJ_G0024770__Chrm1	11.2203	-1.98369	0.669032	-2.96502	0.00302663	0.0298937
MGP_BALBcJ_G0022104__Cenpm	9.00221	2.33132	0.786365	2.96468	0.00302996	0.0299015
MGP_BALBcJ_G0029917__Trpv4	149.314	0.662587	0.223554	2.96388	0.00303786	0.0299608
MGP_BALBcJ_G0035079__Zfp949	570.389	-0.467909	0.157885	-2.9636	0.0030406	0.0299692
MGP_BALBcJ_G0032702__Trim30d	19.8537	1.52272	0.51407	2.9621	0.0030555	0.0300974
MGP_BALBcJ_G0022921__Robo2	25.9247	-1.64943	0.556883	-2.9619	0.00305743	0.0300977
MGP_BALBcJ_G0017398__Rnf126	696.137	0.366992	0.123918	2.96158	0.0030606	0.0301102
MGP_BALBcJ_G0025273__Csf2ra	699.042	0.850489	0.28721	2.96121	0.00306435	0.0301283
MGP_BALBcJ_G0025315__Prkcq	25.4229	-1.9687	0.664993	-2.96048	0.00307156	0.0301805
MGP_BALBcJ_G0028820__Khdrbs1	1787.77	-0.353728	0.119528	-2.95938	0.00308262	0.0302667
MGP_BALBcJ_G0032583__Il18bp	346.477	0.505608	0.170858	2.95922	0.00308415	0.0302667
MGP_BALBcJ_G0033185__Ifitm5	12.5547	1.7009	0.574826	2.95898	0.00308663	0.0302723
MGP_BALBcJ_G0021172__Lgals3	1448.06	1.88217	0.63644	2.95735	0.00310298	0.0304138
MGP_BALBcJ_G0035942__Cited1	18.006	-2.01678	0.682108	-2.95668	0.00310966	0.0304604
MGP_BALBcJ_G0019120__Coasy	1353.2	-0.283968	0.096117	-2.9544	0.00313273	0.0306486
MGP_BALBcJ_G0035107__Chst2	321.72	1.11229	0.376485	2.95442	0.00313262	0.0306486
MGP_BALBcJ_G0005949__BC016548	323.175	-0.437434	0.148092	-2.95381	0.00313882	0.030674
MGP_BALBcJ_G0026360__Map1a	91.4549	0.79977	0.270763	2.95377	0.0031392	0.030674
MGP_BALBcJ_G0016381__NA	602.882	-0.371251	0.12573	-2.95277	0.00314936	0.0307519
MGP_BALBcJ_G0031147__Alox5	111.147	1.19675	0.40532	2.9526	0.00315106	0.0307519
MGP_BALBcJ_G0005429__Fam120aos	115.356	-0.617109	0.209036	-2.95217	0.00315552	0.0307765
MGP_BALBcJ_G0016624__Ccdc181	244.866	-0.367806	0.12461	-2.95166	0.00316066	0.0308077
MGP_BALBcJ_G0021339__Khnyn	1232	-0.339618	0.11512	-2.95013	0.0031764	0.030942
MGP_BALBcJ_G0004163__Abhd11os	336.626	-0.81124	0.275181	-2.94803	0.0031981	0.0311343
MGP_BALBcJ_G0032895__Gprc5b	2172.98	-0.590285	0.200288	-2.94718	0.00320682	0.0312001
MGP_BALBcJ_G0023932__Pja2	2436.84	-0.248741	0.0844176	-2.94655	0.0032134	0.0312449
MGP_BALBcJ_G0028711__Mfsd2a	270.804	1.46699	0.498011	2.9457	0.00322223	0.0312973
MGP_BALBcJ_G0034995__Ccpg1os	174.794	-0.479147	0.162662	-2.94565	0.00322274	0.0312973
MGP_BALBcJ_G0020805__Gcnt4	42.2353	1.44348	0.490723	2.94155	0.00326579	0.031686
MGP_BALBcJ_G0035249__Uba7	874.501	-0.499895	0.169948	-2.94145	0.00326676	0.031686
MGP_BALBcJ_G0022337__Krt7	1360.36	0.865617	0.294477	2.93951	0.00328734	0.031866
MGP_BALBcJ_G0033262__NA	155.361	1.28115	0.435917	2.93898	0.00329294	0.0319008
MGP_BALBcJ_G0030665__Pdia4	5829.83	0.634407	0.215909	2.93831	0.00330005	0.0319502
MGP_BALBcJ_G0016994__Myb	34.6178	1.02392	0.348602	2.93721	0.00331181	0.0319541
MGP_BALBcJ_G0020813__Arhgef28	299.928	-0.475035	0.161703	-2.9377	0.00330658	0.0319541
MGP_BALBcJ_G0025841__Plekha3	775.495	0.277853	0.0945945	2.93731	0.00331076	0.0319541
MGP_BALBcJ_G0032246__Emp3	276.329	1.18275	0.4026	2.93778	0.00330574	0.0319541
MGP_BALBcJ_G0037046__Gm43914	6.82439	-2.57648	0.876971	-2.93793	0.00330408	0.0319541
MGP_BALBcJ_G0039855__NA	230.318	0.60594	0.206303	2.93714	0.00331255	0.0319541
MGP_BALBcJ_G0029855__Zfp605	368.466	-0.452972	0.154237	-2.93686	0.00331554	0.0319635
MGP_BALBcJ_G0020665__Zfp874a	796.164	-0.290514	0.0989342	-2.93644	0.00332002	0.0319872
MGP_BALBcJ_G0029235__Samd11	12.885	2.11444	0.720398	2.93509	0.00333449	0.0321071
MGP_BALBcJ_G0034693__Kmt2a	3943.4	-0.283516	0.0966116	-2.9346	0.00333982	0.032139
MGP_BALBcJ_G0019809__Mpp5	1460.71	-0.251226	0.0856238	-2.93407	0.0033455	0.0321545
MGP_BALBcJ_G0027032__Fabp5	4989.92	1.3923	0.474527	2.93407	0.00334549	0.0321545
MGP_BALBcJ_G0030544__Cald1	4082.45	0.648142	0.220934	2.93364	0.00335014	0.0321797
MGP_BALBcJ_G0016075__Igfbp5	194006	-0.969501	0.330522	-2.93324	0.00335439	0.0322009
MGP_BALBcJ_G0040066__NA	16.0449	1.69503	0.578118	2.93198	0.00336804	0.0323124
MGP_BALBcJ_G0024696__Slc25a45	769.945	-0.584922	0.199614	-2.93026	0.00338675	0.0324722
MGP_BALBcJ_G0027741__Cyb561d1	797.113	-0.290152	0.099026	-2.93005	0.00338902	0.0324744
MGP_BALBcJ_G0036075__Plp1	107.331	-0.723081	0.246887	-2.9288	0.00340277	0.0325864
MGP_BALBcJ_G0026386__Duoxa1	766.021	-1.50529	0.514002	-2.92856	0.00340534	0.0325913
MGP_BALBcJ_G0030957__Pcbp1	3886.9	0.25087	0.0857003	2.9273	0.0034192	0.0327042
MGP_BALBcJ_G0020603__Ctla2b	98.4233	1.00042	0.341852	2.92647	0.00342827	0.0327548
MGP_BALBcJ_G0032748__Ilk	2400.32	0.220322	0.0752865	2.92644	0.00342862	0.0327548
MGP_BALBcJ_G0019091__Eif1	3069.11	0.302513	0.103404	2.92554	0.00343855	0.0327904
MGP_BALBcJ_G0032701__Trim30a	304.883	0.718303	0.245518	2.92566	0.00343724	0.0327904
MGP_BALBcJ_G0033067__Bag3	1201.34	0.340227	0.116294	2.92558	0.0034381	0.0327904
MGP_BALBcJ_G0026736__Phf20	1200.76	-0.227166	0.0776636	-2.925	0.00344458	0.0328219
MGP_BALBcJ_G0029128__Spsb1	282.437	0.986955	0.337436	2.92487	0.003446	0.0328219
MGP_BALBcJ_G0029101__Fbxo44	433.826	-0.436435	0.149243	-2.92432	0.0034521	0.0328603
MGP_BALBcJ_G0027022__Pkia	200.337	-0.526227	0.180005	-2.9234	0.00346234	0.0329379
MGP_BALBcJ_G0028653__2610528J11Rik	314.873	0.441333	0.151054	2.92168	0.00348144	0.0330998
MGP_BALBcJ_G0028785__Zscan20	174.414	-0.497359	0.170282	-2.9208	0.00349134	0.0331537
MGP_BALBcJ_G0029625__Aasdh	464.878	-0.315635	0.108065	-2.9208	0.00349136	0.0331537
MGP_BALBcJ_G0031411__Art4	33.9874	-1.21864	0.417256	-2.92062	0.00349339	0.0331537
MGP_BALBcJ_G0024399__Snx2	2218.85	0.304436	0.104252	2.9202	0.00349803	0.0331779
MGP_BALBcJ_G0032581__Lrrc51	111.636	-0.556089	0.190466	-2.91962	0.00350455	0.0332198
MGP_BALBcJ_G0027444__S100a16	502.326	0.642501	0.220242	2.91725	0.00353127	0.0334531
MGP_BALBcJ_G0024939__Gcnt1	190.702	1.23271	0.422631	2.91675	0.00353698	0.0334672
MGP_BALBcJ_G0030374__Pomp	1765.05	0.258601	0.0886586	2.91681	0.0035363	0.0334672
MGP_BALBcJ_G0022100__Ccdc134	367.199	0.382347	0.131142	2.91551	0.00355113	0.033579
MGP_BALBcJ_G0032547__Pold3	1112.72	-0.328663	0.112736	-2.91534	0.00355304	0.033579
MGP_BALBcJ_G0005531__4930480K23Rik	59.2296	-0.785498	0.269549	-2.91412	0.00356692	0.0336901
MGP_BALBcJ_G0024566__Mbp	1863.98	-0.430817	0.147853	-2.91382	0.00357031	0.0337021
MGP_BALBcJ_G0016559__Cep350	2016.78	-0.256026	0.087878	-2.91342	0.00357488	0.0337252
MGP_BALBcJ_G0036097__Morc4	309.837	0.940724	0.322939	2.91301	0.00357967	0.0337503
MGP_BALBcJ_G0023316__Tpsab1	41.3924	1.12183	0.385183	2.91246	0.003586	0.033784
MGP_BALBcJ_G0033380__Kbtbd11	139.669	-1.09024	0.374355	-2.91232	0.00358751	0.033784
MGP_BALBcJ_G0035586__Il13ra1	991.524	0.721109	0.247671	2.91156	0.00359633	0.0338469
MGP_BALBcJ_G0022448__Rogdi	1855.36	-1.35728	0.466363	-2.91036	0.00361017	0.0339542
MGP_BALBcJ_G0025159__Poll	286.847	-0.390802	0.134287	-2.9102	0.00361201	0.0339542
MGP_BALBcJ_G0033049__Prss8	2005.85	-0.497139	0.170839	-2.90999	0.00361442	0.0339567
MGP_BALBcJ_G0004716__Gm15726	25.337	2.75988	0.948779	2.90888	0.00362725	0.0340563
MGP_BALBcJ_G0022845__Alcam	711.174	0.538737	0.185215	2.9087	0.00362932	0.0340563
MGP_BALBcJ_G0030203__Ephb4	1259.18	0.255384	0.0878118	2.90831	0.00363391	0.0340792
MGP_BALBcJ_G0017214__Adamts14	58.3254	1.14564	0.394025	2.90752	0.00364307	0.0341247
MGP_BALBcJ_G0022584__Cdc45	42.4695	0.773974	0.266181	2.9077	0.003641	0.0341247
MGP_BALBcJ_G0030224__Pilra	42.2697	1.39374	0.479396	2.90728	0.00364588	0.0341309
MGP_BALBcJ_G0034731__NA	24.5186	-1.10013	0.378452	-2.90691	0.00365014	0.0341506
MGP_BALBcJ_G0017703__Rap1b	4864.69	0.260775	0.0897368	2.906	0.00366082	0.0342269
MGP_BALBcJ_G0022697__Nrros	519.572	1.16453	0.400753	2.90585	0.00366261	0.0342269
MGP_BALBcJ_G0026751__Samhd1	4311.18	-0.311883	0.107348	-2.90533	0.00366861	0.0342426
MGP_BALBcJ_G0032305__Nipa2	1269.07	0.268741	0.0924976	2.90539	0.00366799	0.0342426
MGP_BALBcJ_G0030989__Ruvbl1	409.158	0.426257	0.146731	2.90503	0.00367216	0.0342555
MGP_BALBcJ_G0011086__NA	764.98	-0.278404	0.0958832	-2.90358	0.00368924	0.034377
MGP_BALBcJ_G0033088__Acadsb	2208.82	-0.334522	0.115211	-2.90355	0.00368952	0.034377
MGP_BALBcJ_G0021093__Timm23	645.373	0.352041	0.121263	2.90311	0.00369474	0.0344054
MGP_BALBcJ_G0017245__Slc25a16	2236.94	-0.515385	0.177571	-2.90242	0.00370287	0.0344289
MGP_BALBcJ_G0020655__Zfp458	103.992	-0.84155	0.289955	-2.90235	0.00370378	0.0344289
MGP_BALBcJ_G0021803__Trps1	7801.21	-0.58461	0.201408	-2.90262	0.00370053	0.0344289
MGP_BALBcJ_G0034101__Sf3b3	2350.84	0.364741	0.12572	2.90122	0.00371709	0.0345323
MGP_BALBcJ_G0027128__D3Ertd254e	556.427	-0.315015	0.10861	-2.90044	0.00372645	0.034599
MGP_BALBcJ_G0016397__Fam72a	14.9113	1.64338	0.566633	2.90025	0.00372867	0.0345994
MGP_BALBcJ_G0016146__Serpine2	94.6207	0.858813	0.296152	2.8999	0.00373276	0.0346049
MGP_BALBcJ_G0021771__Rrm2b	536.686	-0.336594	0.116074	-2.89983	0.00373363	0.0346049
MGP_BALBcJ_G0020464__Fam8a1	2627.26	-0.368531	0.127098	-2.89959	0.0037365	0.0346112
MGP_BALBcJ_G0016058__Erbb4	67.8707	-0.948514	0.32727	-2.89826	0.00375239	0.0346697
MGP_BALBcJ_G0016827__Srp9	1653.81	0.27986	0.0965573	2.89838	0.00375094	0.0346697
MGP_BALBcJ_G0019085__Krt19	9474.03	0.411251	0.141872	2.89874	0.00374661	0.0346697
MGP_BALBcJ_G0024527__Lipg	78.4859	1.24213	0.428594	2.89815	0.00375375	0.0346697
MGP_BALBcJ_G0029866__Noc4l	650.738	0.398736	0.137574	2.89833	0.00375155	0.0346697
MGP_BALBcJ_G0011343__NA	482.347	0.33608	0.116024	2.89665	0.00377176	0.0348158
MGP_BALBcJ_G0032992__NA	839.531	0.256665	0.088617	2.89634	0.00377541	0.0348292
MGP_BALBcJ_G0029443__Sh3bp2	2097.37	0.483704	0.167043	2.89569	0.00378328	0.0348814
MGP_BALBcJ_G0025341__Plxdc2	877.189	-0.535357	0.184894	-2.89548	0.00378576	0.034884
MGP_BALBcJ_G0030270__C130050O18Rik	92.5967	0.855574	0.295514	2.8952	0.00378912	0.0348946
MGP_BALBcJ_G0024110__Snrpd1	537.458	0.481245	0.166238	2.89491	0.0037927	0.0349074
MGP_BALBcJ_G0016479__Kif21b	756.509	-0.84876	0.293265	-2.89418	0.00380155	0.0349686
MGP_BALBcJ_G0026747__Ndrg3	665.236	-0.283637	0.0980804	-2.89189	0.00382936	0.0352039
MGP_BALBcJ_G0034119__Bcar1	1223.67	0.401344	0.138821	2.89109	0.00383903	0.0352724
MGP_BALBcJ_G0019263__Helz	1738.58	-0.292565	0.101202	-2.8909	0.00384141	0.0352738
MGP_BALBcJ_G0028934__Pnrc2	2358.91	-0.244165	0.0844669	-2.89066	0.00384439	0.0352807
MGP_BALBcJ_G0025606__Angptl2	1131.06	-0.591141	0.204522	-2.89036	0.00384802	0.0352936
MGP_BALBcJ_G0028351__Tmem268	1212.88	0.418757	0.144973	2.88852	0.0038706	0.0354801
MGP_BALBcJ_G0022844__Cblb	860.227	0.487303	0.168751	2.88771	0.00388062	0.0355514
MGP_BALBcJ_G0030031__P2rx7	1482.73	-0.312395	0.108208	-2.88697	0.00388967	0.0356137
MGP_BALBcJ_G0027544__Sema6c	82.7881	-0.754217	0.261304	-2.88636	0.00389732	0.0356632
MGP_BALBcJ_G0027247__Ccnl1	2976.51	0.46237	0.160263	2.88506	0.00391334	0.0357685
MGP_BALBcJ_G0028643__Artn	12.56	1.68134	0.582759	2.88515	0.00391231	0.0357685
MGP_BALBcJ_G0022034__Sox10	6625.35	-0.352527	0.122231	-2.88411	0.00392526	0.0358519
MGP_BALBcJ_G0022761__Golgb1	5177.53	-0.231696	0.0803395	-2.88397	0.00392699	0.0358519
MGP_BALBcJ_G0019643__Arl4a	1070	-0.642045	0.222666	-2.88345	0.00393351	0.0358701
MGP_BALBcJ_G0031539__Suv420h2	836.765	-0.321738	0.111578	-2.88354	0.00393239	0.0358701
MGP_BALBcJ_G0017423__Cbarp	247.095	0.475276	0.164912	2.88199	0.00395172	0.0360155
MGP_BALBcJ_G0015189__NA	142.81	-0.78275	0.271655	-2.88141	0.00395905	0.0360559
MGP_BALBcJ_G0036144__Fam120c	298.8	-0.480697	0.166835	-2.88127	0.00396071	0.0360559
MGP_BALBcJ_G0029046__Fhad1	21.9002	1.29307	0.448865	2.88076	0.00396719	0.0360942
MGP_BALBcJ_G0017528__D10Wsu102e	1116.42	0.402255	0.139765	2.87808	0.00400105	0.0363813
MGP_BALBcJ_G0019246__Cd79b	67.6083	-2.86586	0.99598	-2.87743	0.0040093	0.0364139
MGP_BALBcJ_G0030138__Lat2	240.988	0.867755	0.30161	2.87707	0.00401383	0.0364139
MGP_BALBcJ_G0032928__Igsf6	251.017	1.14386	0.397567	2.87715	0.00401283	0.0364139
MGP_BALBcJ_G0034315__NA	793.664	-0.431219	0.149864	-2.87741	0.00400956	0.0364139
MGP_BALBcJ_G0021327__Tgm1	1198.14	-0.585012	0.203401	-2.87615	0.00402561	0.0364746
MGP_BALBcJ_G0026770__Adig	449.473	0.702778	0.244337	2.87627	0.00402411	0.0364746
MGP_BALBcJ_G0028606__Mast2	2081.85	0.425852	0.148071	2.87601	0.00402742	0.0364746
MGP_BALBcJ_G0020058__Dync1h1	14621.3	-0.219561	0.0763537	-2.87557	0.00403293	0.0365036
MGP_BALBcJ_G0022554__Klhl22	1064.97	-0.530113	0.18441	-2.87464	0.00404491	0.0365912
MGP_BALBcJ_G0024626__Ankrd13d	182.654	-0.48951	0.17034	-2.87372	0.00405662	0.0366762
MGP_BALBcJ_G0022550__Slc7a4	494.479	0.633741	0.220561	2.87332	0.00406184	0.0366908
MGP_BALBcJ_G0028916__Ldlrap1	1029.03	0.305234	0.106234	2.87324	0.00406286	0.0366908
MGP_BALBcJ_G0023225__Ccdc64b	978.985	-0.647812	0.225702	-2.8702	0.00410207	0.0370238
MGP_BALBcJ_G0026702__Eif2s2	1647.45	0.311726	0.108619	2.86989	0.00410619	0.0370399
MGP_BALBcJ_G0017713__Llph	661.768	0.274817	0.0957987	2.86869	0.00412172	0.0371588
MGP_BALBcJ_G0019575__Cys1	31.7184	-1.60923	0.561075	-2.86812	0.00412916	0.0371835
MGP_BALBcJ_G0034310__Arhgap42	5066.51	-0.422668	0.14736	-2.86827	0.00412723	0.0371835
MGP_BALBcJ_G0016007__Nop58	994.487	0.676872	0.236082	2.86711	0.00414242	0.0372563
MGP_BALBcJ_G0022815__Atg3	1216.46	0.258171	0.0900502	2.86696	0.00414429	0.0372563
MGP_BALBcJ_G0025286__Frmd4a	918.131	0.563317	0.196461	2.86732	0.00413966	0.0372563
MGP_BALBcJ_G0003215__Zfhx2os	24.351	-1.32004	0.460597	-2.86593	0.00415787	0.0373572
MGP_BALBcJ_G0001665__NA	8.36708	-2.12077	0.740225	-2.86503	0.00416966	0.0374419
MGP_BALBcJ_G0017734__Lrig3	298.574	-0.473837	0.165419	-2.86446	0.00417719	0.0374882
MGP_BALBcJ_G0030853__Tmem150a	242.083	0.50819	0.177461	2.86367	0.00418761	0.0375605
MGP_BALBcJ_G0022121__Nfam1	265.386	0.928707	0.324548	2.86154	0.00421593	0.0377505
MGP_BALBcJ_G0024930__Tle4	379.845	-0.379355	0.132556	-2.86184	0.00421187	0.0377505
MGP_BALBcJ_G0033843__Nfix	3145.19	-0.327461	0.114434	-2.86157	0.00421547	0.0377505
MGP_BALBcJ_G0016971__Reps1	786.867	0.403034	0.140973	2.85896	0.00425038	0.0380374
MGP_BALBcJ_G0027042__Chmp4c	1719.2	-0.463028	0.161984	-2.85848	0.00425675	0.0380729
MGP_BALBcJ_G0006769__AI480526	1858.69	-0.445252	0.15579	-2.85802	0.00426291	0.0381065
MGP_BALBcJ_G0028780__Gjb4	61.4218	1.82781	0.639591	2.85779	0.00426609	0.0381082
MGP_BALBcJ_G0032291__Prmt3	371.293	0.552274	0.193262	2.85765	0.0042679	0.0381082
MGP_BALBcJ_G0035322__Ptpn23	2332.54	0.320952	0.112342	2.85692	0.0042778	0.0381751
MGP_BALBcJ_G0007268__5830432E09Rik	21.9275	1.47905	0.517839	2.8562	0.00428752	0.0382274
MGP_BALBcJ_G0019228__Tanc2	1935.46	-0.444546	0.155648	-2.85609	0.00428893	0.0382274
MGP_BALBcJ_G0021834__Zhx1	980.309	-0.288825	0.101131	-2.85594	0.0042909	0.0382274
MGP_BALBcJ_G0031642__Ube2m	1500.73	0.265935	0.0931579	2.85466	0.00430823	0.0383387
MGP_BALBcJ_G0035188__Atp2c1	5411.92	-0.20326	0.0712023	-2.85468	0.00430799	0.0383387
MGP_BALBcJ_G0026583__Thbd	665.656	0.602131	0.210992	2.85381	0.0043199	0.0384209
MGP_BALBcJ_G0017100__Rpf2	218.295	0.6069	0.212704	2.85326	0.00432733	0.0384654
MGP_BALBcJ_G0023093__Rps6ka2	81.0358	1.08749	0.38127	2.85229	0.00434054	0.0385612
MGP_BALBcJ_G0030252__Zfp157	269.361	-0.42415	0.14873	-2.85182	0.00434695	0.0385965
MGP_BALBcJ_G0015443__5031434O11Rik	110.895	-0.728122	0.255393	-2.85099	0.00435836	0.0386761
MGP_BALBcJ_G0018642__Srr	846.25	-0.348322	0.122222	-2.84991	0.00437314	0.038774
MGP_BALBcJ_G0029283__Cd36	22025	-0.603057	0.211625	-2.84965	0.00437672	0.038774
MGP_BALBcJ_G0033906__Rpgrip1l	237.989	-0.446519	0.156691	-2.84968	0.00437639	0.038774
MGP_BALBcJ_G0015369__E030042O20Rik	8.98169	-2.01356	0.706645	-2.84947	0.00437918	0.0387741
MGP_BALBcJ_G0016359__Gpr39	53.2528	1.07819	0.378419	2.8492	0.00438292	0.0387856
MGP_BALBcJ_G0021912__Ly6a	1185.54	0.572881	0.20116	2.84789	0.00440107	0.0389027
MGP_BALBcJ_G0025708__Fmnl2	756.076	0.530487	0.186273	2.8479	0.00440094	0.0389027
MGP_BALBcJ_G0019389__40057	2255.27	0.409421	0.143832	2.84653	0.00441983	0.0389599
MGP_BALBcJ_G0021790__Angpt1	579.482	-0.675436	0.237264	-2.84677	0.00441656	0.0389599
MGP_BALBcJ_G0025500__Gtf3c5	1074.41	0.303839	0.106723	2.84698	0.00441366	0.0389599
MGP_BALBcJ_G0026120__Lrp4	179.514	-0.469826	0.16504	-2.84675	0.00441683	0.0389599
MGP_BALBcJ_G0036186__Rps6ka3	2321.91	0.31567	0.110896	2.84655	0.00441951	0.0389599
MGP_BALBcJ_G0021032__Slmap	6732.49	-0.462015	0.162334	-2.84608	0.00442612	0.0389936
MGP_BALBcJ_G0029694__Cox18	277.558	0.382603	0.134448	2.84573	0.00443092	0.0390143
MGP_BALBcJ_G0036384__NA	1422.36	0.688251	0.241877	2.84546	0.00443479	0.0390266
MGP_BALBcJ_G0023810__Bysl	441.068	0.674514	0.237182	2.84387	0.00445698	0.0392001
MGP_BALBcJ_G0011281__NA	51.5074	-0.995767	0.35027	-2.84286	0.0044711	0.0393012
MGP_BALBcJ_G0022380__Prr13	1642.56	0.203211	0.0714854	2.84269	0.00447343	0.0393012
MGP_BALBcJ_G0032553__C2cd3	1334.7	-0.342144	0.120399	-2.84174	0.00448678	0.0393966
MGP_BALBcJ_G0035255__Gmppb	496.266	0.572803	0.201607	2.84119	0.00449462	0.0394437
MGP_BALBcJ_G0032169__Atf5	1217.13	0.485416	0.170871	2.84084	0.00449949	0.0394646
MGP_BALBcJ_G0030694__Tmem176b	8041.71	-0.251473	0.0885276	-2.84062	0.00450258	0.0394698
MGP_BALBcJ_G0016268__Gpr35	275.621	2.01506	0.709752	2.8391	0.00452414	0.0396115
MGP_BALBcJ_G0031913__Psmc4	2344.33	0.244101	0.0859829	2.83895	0.00452625	0.0396115
MGP_BALBcJ_G0036053__Nxf7	111.632	-1.49128	0.525272	-2.83906	0.00452466	0.0396115
MGP_BALBcJ_G0032981__Bola2	437.968	0.325673	0.114773	2.83755	0.00454619	0.0397641
MGP_BALBcJ_G0035491__NA	1571.76	0.427054	0.150582	2.83602	0.00456796	0.0399325
MGP_BALBcJ_G0021948__Smpd5	39.5825	1.14362	0.403291	2.83571	0.00457241	0.0399493
MGP_BALBcJ_G0016711__Cd84	147.11	1.56462	0.551794	2.83552	0.00457509	0.0399507
MGP_BALBcJ_G0030296__Foxk1	1486.64	-0.275812	0.097281	-2.83521	0.00457955	0.0399677
MGP_BALBcJ_G0015586__Gm44597	54.1487	-0.774964	0.273414	-2.8344	0.00459125	0.0400477
MGP_BALBcJ_G0034817__Scaper	492.182	-0.464892	0.16405	-2.83384	0.00459921	0.0400951
MGP_BALBcJ_G0015761__Rrs1	226.471	0.608664	0.214859	2.83285	0.00461349	0.0401975
MGP_BALBcJ_G0005605__Gm4262	7.88804	2.1918	0.773957	2.83194	0.00462661	0.0402675
MGP_BALBcJ_G0029395__Ppm1g	2118.99	0.22032	0.0777978	2.83196	0.00462633	0.0402675
MGP_BALBcJ_G0020553__Fam193b	2526.14	-0.242438	0.0856197	-2.83157	0.004632	0.0402811
MGP_BALBcJ_G0027941__Ssx2ip	952.599	-0.328528	0.116027	-2.83148	0.00463325	0.0402811
MGP_BALBcJ_G0025244__Fam160b1	1364.52	-0.207673	0.0733792	-2.83014	0.00465281	0.040429
MGP_BALBcJ_G0034002__Cbfb	1389.04	0.263177	0.0930067	2.82966	0.00465978	0.0404673
MGP_BALBcJ_G0018764__Ccl12	99.754	3.05696	1.08042	2.82941	0.00466334	0.0404761
MGP_BALBcJ_G0021062__Itih4	262.15	1.09538	0.387252	2.8286	0.00467515	0.0405498
MGP_BALBcJ_G0031023__Hdac11	693.249	-0.469131	0.16586	-2.82848	0.00467695	0.0405498
MGP_BALBcJ_G0024511__Poli	245.255	-0.38175	0.134982	-2.82815	0.00468184	0.0405699
MGP_BALBcJ_G0028377__Lurap1l	1555.4	-0.36626	0.129515	-2.82794	0.00468486	0.040574
MGP_BALBcJ_G0003836__NA	17.1293	1.67765	0.593791	2.82533	0.00472324	0.0408453
MGP_BALBcJ_G0022269__Cacnb3	1366.69	-0.492544	0.17432	-2.82551	0.00472055	0.0408453
MGP_BALBcJ_G0024848__Ms4a6c	662.551	0.913271	0.32325	2.82528	0.00472392	0.0408453
MGP_BALBcJ_G0022571__Ranbp1	885.327	0.480159	0.170014	2.82423	0.00473943	0.0409571
MGP_BALBcJ_G0034536__Esam	848.268	0.439036	0.155632	2.82099	0.00478763	0.041351
MGP_BALBcJ_G0023813__Usp49	282.181	-0.500983	0.177651	-2.82005	0.00480169	0.0414499
MGP_BALBcJ_G0018534__Arrb2	746.163	0.578891	0.205313	2.81955	0.00480907	0.0414838
MGP_BALBcJ_G0029225__Tnfrsf18	50.2143	0.845641	0.299933	2.81943	0.00481085	0.0414838
MGP_BALBcJ_G0029615__Kit	3602.43	-1.28613	0.456263	-2.81883	0.0048199	0.0415392
MGP_BALBcJ_G0028678__Ybx1	6861.77	0.225322	0.0799839	2.81709	0.00484615	0.0417427
MGP_BALBcJ_G0020102__BC022687	127.215	0.491335	0.174426	2.81686	0.00484957	0.0417495
MGP_BALBcJ_G0023369__Crebrf	2050.11	-0.506615	0.179881	-2.8164	0.00485656	0.0417869
MGP_BALBcJ_G0031212__Foxj2	1247.3	-0.244	0.0866473	-2.81601	0.00486241	0.0418147
MGP_BALBcJ_G0026631__Trib3	487.459	0.768144	0.272797	2.81581	0.00486541	0.0418177
MGP_BALBcJ_G0022126__A4galt	150.02	0.77554	0.275456	2.81548	0.00487046	0.0418384
MGP_BALBcJ_G0021521__Lpar6	702.912	-0.460823	0.163751	-2.81417	0.0048904	0.0419642
MGP_BALBcJ_G0034537__Vsig2	149.512	0.602129	0.213962	2.81419	0.0048901	0.0419642
MGP_BALBcJ_G0023337__Stub1	1364.2	0.20408	0.0725243	2.81396	0.00489357	0.0419687
MGP_BALBcJ_G0039798__NA	1582.18	-0.428078	0.152162	-2.8133	0.00490363	0.0420322
MGP_BALBcJ_G0028710__Cap1	8381.39	0.257422	0.0915388	2.81216	0.00492101	0.0421584
MGP_BALBcJ_G0025014__Asah2	704.255	-0.450691	0.16031	-2.81138	0.004933	0.0422383
MGP_BALBcJ_G0021481__Slc25a37	954.349	0.556709	0.198054	2.8109	0.0049403	0.042278
MGP_BALBcJ_G0019284__Abca9	680.55	-0.92245	0.328375	-2.80914	0.00496747	0.0424875
MGP_BALBcJ_G0021270__Slc7a7	656.995	0.463158	0.164925	2.80829	0.00498056	0.0425536
MGP_BALBcJ_G0024666__Banf1	978.333	0.272855	0.0971574	2.80838	0.00497913	0.0425536
MGP_BALBcJ_G0019472__Dus1l	1036.72	0.296801	0.105712	2.80764	0.00499059	0.0425704
MGP_BALBcJ_G0019576__Rrm2	92.4432	0.809073	0.288155	2.80777	0.00498866	0.0425704
MGP_BALBcJ_G0024019__Dhx57	1106.81	-0.254729	0.0907233	-2.80776	0.00498875	0.0425704
MGP_BALBcJ_G0035103__Plscr4	180.451	-0.75125	0.267702	-2.80629	0.00501152	0.042726
MGP_BALBcJ_G0035236__Ifrd2	477.382	0.403404	0.143785	2.80561	0.00502213	0.0427934
MGP_BALBcJ_G0023532__H2-Ob	58.7356	-2.31707	0.826674	-2.80288	0.00506487	0.0431256
MGP_BALBcJ_G0028698__Rims3	254.948	-0.633032	0.225859	-2.80277	0.00506656	0.0431256
MGP_BALBcJ_G0022635__Etv5	273.631	0.874607	0.312099	2.80234	0.00507339	0.0431375
MGP_BALBcJ_G0023921__Vav1	425.925	1.1102	0.396146	2.80249	0.00507094	0.0431375
MGP_BALBcJ_G0018239__Kif3a	671.819	-0.310504	0.11083	-2.80164	0.00508443	0.043185
MGP_BALBcJ_G0030695__Tmem176a	4253.72	-0.261559	0.0933547	-2.80178	0.00508217	0.043185
MGP_BALBcJ_G0004836__Gm29186	69.4091	-1.10582	0.394867	-2.80048	0.0051027	0.0432937
MGP_BALBcJ_G0034645__Ubash3b	241.166	0.951255	0.339672	2.80051	0.00510218	0.0432937
MGP_BALBcJ_G0011932__NA	28.537	0.954501	0.340956	2.79948	0.00511845	0.0434042
MGP_BALBcJ_G0020977__2700060E02Rik	2214.94	-0.201177	0.0718801	-2.79879	0.00512944	0.0434741
MGP_BALBcJ_G0001068__NA	60.5078	-0.702411	0.251014	-2.79829	0.00513736	0.0434932
MGP_BALBcJ_G0022634__Tra2b	1183.46	0.317835	0.113588	2.79813	0.00513993	0.0434932
MGP_BALBcJ_G0033555__Tlr3	2146.93	-0.274021	0.0979181	-2.79847	0.00513456	0.0434932
MGP_BALBcJ_G0005016__A430110L20Rik	112.631	-0.716663	0.256285	-2.79635	0.00516837	0.0435623
MGP_BALBcJ_G0017335__Itgb2	787.952	1.56806	0.560807	2.79607	0.00517278	0.0435623
MGP_BALBcJ_G0022583__Cldn5	678.181	-0.771219	0.275801	-2.79629	0.00516931	0.0435623
MGP_BALBcJ_G0024246__Ankhd1	3460.01	-0.179189	0.0640861	-2.79607	0.00517284	0.0435623
MGP_BALBcJ_G0024611__Cdk2ap2	836.167	0.447207	0.15993	2.79626	0.00516973	0.0435623
MGP_BALBcJ_G0028281__Fktn	732.591	-0.248908	0.0889933	-2.79693	0.00515902	0.0435623
MGP_BALBcJ_G0029293__Fgl2	711.431	1.59746	0.571178	2.79679	0.00516129	0.0435623
MGP_BALBcJ_G0033031__Zfp629	895.482	-0.232633	0.083172	-2.79702	0.00515771	0.0435623
MGP_BALBcJ_G0035430__Ackr2	49.3443	-0.734664	0.262667	-2.79694	0.00515886	0.0435623
MGP_BALBcJ_G0016783__Akt3	758.663	-0.332506	0.118968	-2.79492	0.00519122	0.043683
MGP_BALBcJ_G0026585__Nxt1	215.113	0.440756	0.157704	2.79483	0.00519268	0.043683
MGP_BALBcJ_G0002042__NA	12.9743	1.54119	0.551618	2.79394	0.005207	0.0437106
MGP_BALBcJ_G0019160__Cd300lg	1269.5	-0.485709	0.173836	-2.79407	0.005205	0.0437106
MGP_BALBcJ_G0019318__Tmem104	587.75	0.384071	0.137446	2.79435	0.00520047	0.0437106
MGP_BALBcJ_G0030950__Tgfa	285.232	0.491032	0.175728	2.79428	0.00520161	0.0437106
MGP_BALBcJ_G0024987__Glis3	344.486	0.61091	0.218733	2.79295	0.00522296	0.0438214
MGP_BALBcJ_G0031272__Ltbr	2738.65	0.229705	0.0822815	2.79169	0.00524337	0.0439694
MGP_BALBcJ_G0020774__Homer1	483.203	0.465949	0.166943	2.79106	0.00525355	0.044011
MGP_BALBcJ_G0027593__Polr3gl	478.208	-0.34316	0.122954	-2.79096	0.00525512	0.044011
MGP_BALBcJ_G0033521__Dlc1	911.158	0.487842	0.174799	2.79087	0.00525666	0.044011
MGP_BALBcJ_G0031433__Pde3a	109.9	-0.611973	0.219325	-2.79025	0.00526666	0.0440714
MGP_BALBcJ_G0035043__Col12a1	1825.61	1.36867	0.490688	2.78928	0.00528256	0.0441812
MGP_BALBcJ_G0016679__Fcgr2b	919.213	0.867074	0.310932	2.78863	0.00529312	0.0442461
MGP_BALBcJ_G0026483__Mrps26	562.005	0.286414	0.102779	2.78669	0.00532502	0.0444893
MGP_BALBcJ_G0034323__Amotl1	1614.62	-0.362241	0.129999	-2.7865	0.00532812	0.0444917
MGP_BALBcJ_G0027371__Lmna	5218.92	0.419883	0.150706	2.78611	0.00533449	0.0445215
MGP_BALBcJ_G0020710__Tppp	247.958	-0.982354	0.352649	-2.78564	0.00534223	0.0445392
MGP_BALBcJ_G0021400__Tnfrsf19	145.852	2.09028	0.750366	2.78569	0.00534147	0.0445392
MGP_BALBcJ_G0029572__Bend4	154.548	0.963904	0.34617	2.78448	0.00536133	0.0446749
MGP_BALBcJ_G0026529__Tmx4	795.512	0.582653	0.209269	2.78423	0.00536546	0.0446859
MGP_BALBcJ_G0028101__Smim8	204.547	-0.414023	0.148823	-2.78198	0.00540283	0.0449735
MGP_BALBcJ_G0015135__D030028A08Rik	188.127	0.582795	0.209603	2.78048	0.00542788	0.0451583
MGP_BALBcJ_G0032346__Cers3	6.84012	2.28689	0.822604	2.78007	0.00543479	0.0451921
MGP_BALBcJ_G0017915__Sec14l2	1007.99	-0.373108	0.134244	-2.77933	0.00544707	0.0452703
MGP_BALBcJ_G0027322__Fam160a1	1629.24	-0.314004	0.113018	-2.77835	0.00546352	0.0453833
MGP_BALBcJ_G0033512__Tnks	1421.31	-0.311879	0.112281	-2.77767	0.00547509	0.0454556
MGP_BALBcJ_G0010780__NA	74.1159	0.589066	0.212135	2.77685	0.00548888	0.0455448
MGP_BALBcJ_G0015321__NA	12.2605	-2.84823	1.02577	-2.77669	0.00549159	0.0455448
MGP_BALBcJ_G0016666__Uap1	1708.16	0.26614	0.0959012	2.77515	0.00551767	0.0457372
MGP_BALBcJ_G0024421__Adamts19	21.2974	1.69687	0.611559	2.77465	0.00552604	0.0457681
MGP_BALBcJ_G0030714__Nfe2l3	3347.83	-0.369736	0.133258	-2.77459	0.00552717	0.0457681
MGP_BALBcJ_G0023927__Nudt12	667.139	-0.366358	0.132103	-2.77328	0.00554952	0.0459186
MGP_BALBcJ_G0028602__Lurap1	297.029	-0.474449	0.171085	-2.77318	0.00555114	0.0459186
MGP_BALBcJ_G0015207__4930431P03Rik	352.03	-0.687985	0.248319	-2.77057	0.00559575	0.0462634
MGP_BALBcJ_G0015577__E230016M11Rik	93.2657	-0.625972	0.225981	-2.77003	0.00560519	0.0462795
MGP_BALBcJ_G0017501__Ncln	1757.83	0.256676	0.0926643	2.76995	0.00560645	0.0462795
MGP_BALBcJ_G0024417__Slc12a2	7977.26	-0.484496	0.174904	-2.77007	0.00560436	0.0462795
MGP_BALBcJ_G0030325__Aimp2	372.1	0.352199	0.1272	2.76887	0.00562517	0.0464099
MGP_BALBcJ_G0021501__Piwil2	77.7654	1.2399	0.44786	2.76849	0.00563169	0.0464153
MGP_BALBcJ_G0029290__Ptpn12	1656.46	0.466389	0.168455	2.76863	0.0056293	0.0464153
MGP_BALBcJ_G0018387__Ulk2	2292.12	-0.324973	0.117416	-2.76771	0.00564523	0.0465028
MGP_BALBcJ_G0024942__Ostf1	1393.74	0.275176	0.0994704	2.76641	0.0056677	0.0466537
MGP_BALBcJ_G0031844__Erf	718.366	0.48101	0.173882	2.76631	0.00566945	0.0466537
MGP_BALBcJ_G0016678__Fcrla	20.0554	-2.25167	0.814105	-2.76582	0.005678	0.0466795
MGP_BALBcJ_G0019401__Tha1	183.064	0.460213	0.166395	2.76579	0.00567847	0.0466795
MGP_BALBcJ_G0019471__Gps1	1161.41	0.284422	0.102848	2.76546	0.00568428	0.0467031
MGP_BALBcJ_G0017557__Nt5dc3	816.27	0.38257	0.138375	2.76473	0.00569692	0.0467827
MGP_BALBcJ_G0015791__Rdh10	522.882	0.66769	0.241532	2.7644	0.00570283	0.0467975
MGP_BALBcJ_G0032505__Usp35	244.181	-0.349256	0.126345	-2.76429	0.00570463	0.0467975
MGP_BALBcJ_G0017326__Col6a1	4102.7	0.802555	0.29039	2.76371	0.00571475	0.0468562
MGP_BALBcJ_G0020129__Itgb8	1986.69	-0.627968	0.227276	-2.76302	0.00572698	0.0469323
MGP_BALBcJ_G0019200__Fmnl1	564.03	1.54551	0.559507	2.76227	0.00574013	0.0469541
MGP_BALBcJ_G0020772__Cmya5	218.267	-0.706744	0.255836	-2.76249	0.00573625	0.0469541
MGP_BALBcJ_G0023655__Znrd1as	119.411	-0.455533	0.164917	-2.76219	0.0057415	0.0469541
MGP_BALBcJ_G0028857__Ptafr	855.412	0.756459	0.273826	2.76255	0.00573514	0.0469541
MGP_BALBcJ_G0030923__Dysf	1123.33	0.571745	0.20706	2.76126	0.00575789	0.0470639
MGP_BALBcJ_G0025126__Entpd7	317.302	0.383557	0.138955	2.7603	0.00577483	0.047178
MGP_BALBcJ_G0023820__Mdfi	691.911	0.342962	0.124295	2.75926	0.00579332	0.0472347
MGP_BALBcJ_G0027517__Rorc	2374.48	-0.736024	0.266719	-2.75955	0.00578811	0.0472347
MGP_BALBcJ_G0028224__Shb	293.346	0.469989	0.170327	2.75933	0.00579194	0.0472347
MGP_BALBcJ_G0028347__Orm2	1903.76	-1.00473	0.364133	-2.75923	0.0057937	0.0472347
MGP_BALBcJ_G0022417__Zfp174	110.817	-0.647667	0.23478	-2.75861	0.00580482	0.047295
MGP_BALBcJ_G0024759__Rtn3	9309.28	-0.248884	0.090225	-2.75848	0.00580706	0.047295
MGP_BALBcJ_G0017274__Slc16a9	601.715	-1.46912	0.533199	-2.75528	0.00586413	0.0475041
MGP_BALBcJ_G0018091__Lcp2	298.686	1.17012	0.42454	2.75621	0.00584761	0.0475041
MGP_BALBcJ_G0018293__1810065E05Rik	2324.6	-1.04635	0.379715	-2.75561	0.00585835	0.0475041
MGP_BALBcJ_G0021785__Lrp12	313.909	0.38625	0.140193	2.75512	0.00586698	0.0475041
MGP_BALBcJ_G0022679__Atp13a3	7609.98	-0.297641	0.107982	-2.7564	0.00584422	0.0475041
MGP_BALBcJ_G0024050__Srbd1	468.759	-0.333598	0.121075	-2.7553	0.00586384	0.0475041
MGP_BALBcJ_G0025492__Olfm1	199.45	0.901376	0.327055	2.75604	0.00585064	0.0475041
MGP_BALBcJ_G0027202__Wwtr1	2922.88	-0.231324	0.0839599	-2.75518	0.00586606	0.0475041
MGP_BALBcJ_G0030171__Ywhag	4804.66	0.428765	0.15553	2.75681	0.00583688	0.0475041
MGP_BALBcJ_G0030930__NA	7079.79	-0.387285	0.140574	-2.75503	0.0058687	0.0475041
MGP_BALBcJ_G0035965__Pbdc1	497.138	0.415063	0.150636	2.75541	0.00586192	0.0475041
MGP_BALBcJ_G0036122__Chrdl1	83.4691	-1.27756	0.463591	-2.75579	0.00585512	0.0475041
MGP_BALBcJ_G0023022__Slc5a3	8930.99	-0.647355	0.235023	-2.75444	0.00587934	0.0475659
MGP_BALBcJ_G0025527__Zer1	1236.35	-0.436846	0.15863	-2.75387	0.0058895	0.0476238
MGP_BALBcJ_G0025729__Baz2b	2435.18	-0.24386	0.0885705	-2.75329	0.00590002	0.0476846
MGP_BALBcJ_G0015772__Arfgef1	3433.39	-0.217109	0.0788974	-2.75179	0.00592703	0.0478784
MGP_BALBcJ_G0034921__Dpp8	3543.2	-0.201137	0.0731002	-2.75152	0.00593185	0.047893
MGP_BALBcJ_G0028779__Gjb3	45.37	1.65939	0.603178	2.75108	0.00593993	0.0479338
MGP_BALBcJ_G0028805__Bsdc1	2625.5	-0.369705	0.134407	-2.75063	0.00594801	0.0479746
MGP_BALBcJ_G0032353__Igf1r	340.815	0.756347	0.275008	2.75027	0.00595455	0.0480029
MGP_BALBcJ_G0022511__Abcc1	476.63	0.732307	0.266352	2.7494	0.00597051	0.0480826
MGP_BALBcJ_G0024846__Ms4a4c	105.748	1.53107	0.556853	2.7495	0.00596864	0.0480826
MGP_BALBcJ_G0028178__Atp8b5	7.39707	2.46502	0.896729	2.7489	0.00597959	0.0481313
MGP_BALBcJ_G0016341__Ptpn4	1045.1	-0.282529	0.102798	-2.74838	0.00598908	0.0481832
MGP_BALBcJ_G0017332__Pofut2	1388.51	0.292747	0.106582	2.74668	0.00602013	0.0483844
MGP_BALBcJ_G0026132__Creb3l1	662.297	0.441261	0.160652	2.74668	0.00602019	0.0483844
MGP_BALBcJ_G0027653__Vangl1	504.994	-0.404453	0.147288	-2.74601	0.00603246	0.0484584
MGP_BALBcJ_G0000084__Ighv1-67	43.4274	1.03366	0.376477	2.74561	0.00603979	0.0484928
MGP_BALBcJ_G0025170__Nolc1	1159.81	0.433453	0.157918	2.7448	0.00605474	0.0485881
MGP_BALBcJ_G0024694__Scyl1	1994.21	0.210895	0.0768913	2.74277	0.00609234	0.0488651
MGP_BALBcJ_G0033835__Zswim4	1141.93	0.49228	0.179561	2.74158	0.00611446	0.0489983
MGP_BALBcJ_G0034940__Trip4	972.668	-0.239132	0.0872305	-2.74138	0.00611822	0.0489983
MGP_BALBcJ_G0035545__Gpr34	121.993	-1.04516	0.381234	-2.74151	0.00611578	0.0489983
MGP_BALBcJ_G0016724__Atp1a2	1192.39	-0.705816	0.257518	-2.74084	0.00612823	0.0490537
MGP_BALBcJ_G0022363__Eif4b	8130.18	-0.244164	0.0890897	-2.74065	0.00613183	0.0490578
MGP_BALBcJ_G0033608__Mfap3l	1344.01	-0.383427	0.139979	-2.73918	0.00615931	0.0492528
MGP_BALBcJ_G0029743__Bmp2k	552.813	0.640124	0.233763	2.73835	0.00617486	0.0493522
MGP_BALBcJ_G0027641__Vtcn1	2005.97	-0.353629	0.129195	-2.73716	0.00619724	0.0495061
MGP_BALBcJ_G0024443__Slc26a2	1911.47	-0.408313	0.149253	-2.7357	0.00622472	0.0497005
MGP_BALBcJ_G0018260__Hint1	2081.23	0.371518	0.135849	2.73478	0.0062421	0.0498143
MGP_BALBcJ_G0018179__Tbc1d9b	3573.87	-0.396445	0.145009	-2.73394	0.00625817	0.0499173
MGP_BALBcJ_G0024220__Etf1	4024.13	0.286181	0.10472	2.73283	0.00627932	0.0500476
MGP_BALBcJ_G0035326__Setd2	2543.01	-0.253423	0.0927354	-2.73275	0.00628082	0.0500476
MGP_BALBcJ_G0022524__Fgd4	973.684	-0.66972	0.245147	-2.73192	0.0062967	0.0501355
MGP_BALBcJ_G0025614__Hspa5	26488.5	0.766611	0.280621	2.73184	0.00629818	0.0501355
MGP_BALBcJ_G0030236__Zscan21	803.444	-0.336939	0.123363	-2.73127	0.00630899	0.0501964
MGP_BALBcJ_G0023917__Tnfsf14	25.384	3.00145	1.09926	2.73043	0.00632527	0.0503006
MGP_BALBcJ_G0016889__Rcor3	683.673	-0.379736	0.139118	-2.7296	0.00634112	0.0504014
MGP_BALBcJ_G0023440__Dnah8	81.7546	-1.49618	0.54849	-2.72781	0.00637565	0.0506505
MGP_BALBcJ_G0022727__Umps	349.775	0.537449	0.197077	2.72709	0.00638948	0.0507349
MGP_BALBcJ_G0035031__Ick	1238.74	-0.355979	0.130542	-2.72693	0.00639268	0.0507349
MGP_BALBcJ_G0024492__Spire1	265.856	0.420172	0.154093	2.72673	0.00639644	0.0507394
MGP_BALBcJ_G0022857__Tfg	1622.95	0.283503	0.10398	2.72651	0.0064008	0.0507485
[truncated: 13,850 more rows]
