# Supplementary material for: Estrogen exacerbates mammary involution through neutrophil-dependent and -independent mechanism
Source: eLife journal article supplement (doi:10.7554/elife.57274), 2020-07-24
Supplement: supp [file elife-57274-supp-v1.zip › elife_poa_e57274_Figure_2_source_data_3.xlsx]

## Sheet: groupD_Vs_groupB
	baseMean	log2FoldChange	lfcSE	stat	pvalue	padj
MGP_BALBcJ_G0018261__Gpx3	15857.6	2.99957	0.265791	11.2854	1.5487e-29	2.45454e-25
MGP_BALBcJ_G0019854__Papln	2146.48	2.17307	0.214503	10.1307	4.03608e-24	3.19839e-20
MGP_BALBcJ_G0032066__Chst8	68.5847	4.92995	0.503773	9.78606	1.29229e-22	6.82714e-19
MGP_BALBcJ_G0019554__Greb1	85.4683	4.75037	0.490852	9.67779	3.74714e-22	1.48471e-18
MGP_BALBcJ_G0025220__Rbm20	356.414	3.97458	0.4138	9.60509	7.60898e-22	2.41189e-18
MGP_BALBcJ_G0030300__Mmd2	90.9984	4.67019	0.501793	9.30702	1.31469e-20	3.47277e-17
MGP_BALBcJ_G0017610__Gm9847	574.767	2.12497	0.233209	9.11189	8.09557e-20	1.83295e-16
MGP_BALBcJ_G0033474__Zfp703	1149.5	1.10103	0.124663	8.83206	1.02768e-18	2.03597e-15
MGP_BALBcJ_G0033816__Adgre5	1200.29	1.23497	0.144826	8.52724	1.49875e-17	2.63931e-14
MGP_BALBcJ_G0019251__Tex2	2616.35	1.18952	0.142109	8.37047	5.73887e-17	9.09554e-14
MGP_BALBcJ_G0032866__Spon1	1180	1.77729	0.216208	8.2203	2.02998e-16	2.92483e-13
MGP_BALBcJ_G0032551__P4ha3	110.92	3.23555	0.400108	8.08668	6.1312e-16	8.09778e-13
MGP_BALBcJ_G0018582__Spns3	113.031	-1.85231	0.237433	-7.80139	6.12291e-15	6.93157e-12
MGP_BALBcJ_G0021421__Ctsb	68175.7	1.18957	0.152326	7.80939	5.74649e-15	6.93157e-12
MGP_BALBcJ_G0025620__Traf1	463.074	-1.14392	0.147486	-7.75613	8.75631e-15	9.25192e-12
MGP_BALBcJ_G0026764__Tgm2	10162.1	1.84454	0.239933	7.68772	1.49783e-14	1.48369e-11
MGP_BALBcJ_G0032272__Ptpn5	45.347	5.25141	0.691746	7.59152	3.16164e-14	2.94758e-11
MGP_BALBcJ_G0031164__Ret	514.957	2.2974	0.303886	7.56008	4.02814e-14	3.54678e-11
MGP_BALBcJ_G0034308__Pgr	132.543	2.99029	0.400429	7.46773	8.15902e-14	6.80591e-11
MGP_BALBcJ_G0039953__NA	28.9956	4.59177	0.619083	7.41704	1.19768e-13	9.491e-11
MGP_BALBcJ_G0019813__Tmem229b	709.055	1.82622	0.2472	7.38764	1.49459e-13	1.12799e-10
MGP_BALBcJ_G0031682__C5ar2	181.877	2.8683	0.390775	7.34003	2.13548e-13	1.53842e-10
MGP_BALBcJ_G0033692__Isyna1	2137.79	1.20908	0.165756	7.29432	3.00167e-13	2.06841e-10
MGP_BALBcJ_G0027993__NA	1394	0.637696	0.090496	7.04667	1.83246e-12	1.21011e-09
MGP_BALBcJ_G0025221__Pdcd4	7435.48	1.81001	0.260202	6.95618	3.49621e-12	2.21646e-09
MGP_BALBcJ_G0032044__Fxyd3	5699.46	-1.00499	0.144779	-6.94156	3.87784e-12	2.36384e-09
MGP_BALBcJ_G0024063__Calm2	4191.79	0.501052	0.0737096	6.79765	1.06338e-11	6.24203e-09
MGP_BALBcJ_G0034309__Gm16485	43.9947	3.61833	0.539439	6.70759	1.9787e-11	1.12001e-08
MGP_BALBcJ_G0029614__Pdgfra	2105.52	1.24059	0.185931	6.6723	2.5183e-11	1.37629e-08
MGP_BALBcJ_G0016385__Pigr	54662.3	0.971095	0.147692	6.57512	4.86127e-11	2.56821e-08
MGP_BALBcJ_G0021879__Khdrbs3	2363.69	1.07955	0.164602	6.55852	5.43445e-11	2.77841e-08
MGP_BALBcJ_G0016424__Plekha6	3035.04	-0.643875	0.101691	-6.33166	2.4253e-10	1.20121e-07
MGP_BALBcJ_G0017718__Wif1	66.8536	1.87983	0.29952	6.27616	3.47027e-10	1.62811e-07
MGP_BALBcJ_G0022817__Cd200	871.901	1.49783	0.238692	6.27516	3.49269e-10	1.62811e-07
MGP_BALBcJ_G0019911__Cipc	1999.51	0.592373	0.0947134	6.25438	3.99101e-10	1.80724e-07
MGP_BALBcJ_G0016558__Qsox1	45985	1.87323	0.300355	6.23672	4.46835e-10	1.96719e-07
MGP_BALBcJ_G0017549__Bpifc	34.8446	2.76887	0.453261	6.10878	1.00396e-09	4.3005e-07
MGP_BALBcJ_G0029091__Plod1	1103.74	0.715406	0.117226	6.1028	1.04228e-09	4.34713e-07
MGP_BALBcJ_G0035104__Plod2	248.161	1.41765	0.232775	6.09021	1.12765e-09	4.58258e-07
MGP_BALBcJ_G0026215__Fibin	270.386	1.40638	0.2322	6.05674	1.38905e-09	5.50378e-07
MGP_BALBcJ_G0023133__Thbs2	1164.64	1.00004	0.168407	5.93821	2.88144e-09	1.11385e-06
MGP_BALBcJ_G0021368__Gjb6	26.0792	-2.50746	0.424348	-5.90897	3.44243e-09	1.26882e-06
MGP_BALBcJ_G0032271__Tmem86a	515.752	0.797621	0.134947	5.91063	3.40804e-09	1.26882e-06
MGP_BALBcJ_G0020141__Akr1c14	366.614	2.57138	0.436372	5.89263	3.80095e-09	1.36912e-06
MGP_BALBcJ_G0017550__Fbxo7	716.043	0.714024	0.121436	5.87985	4.10636e-09	1.38603e-06
MGP_BALBcJ_G0024805__Fads2	4175.76	-0.744628	0.126494	-5.88667	3.94047e-09	1.38603e-06
MGP_BALBcJ_G0031024__Fbln2	3362.3	1.22254	0.207926	5.87969	4.11025e-09	1.38603e-06
MGP_BALBcJ_G0033972__Cdh11	266.023	1.28067	0.218486	5.86157	4.58517e-09	1.51397e-06
MGP_BALBcJ_G0023028__Clic6	999.67	1.9274	0.329819	5.8438	5.1023e-09	1.65033e-06
MGP_BALBcJ_G0021520__Rb1	7826.57	-0.552584	0.094894	-5.82317	5.77408e-09	1.83027e-06
MGP_BALBcJ_G0035165__Slco2a1	2238.09	0.951596	0.16357	5.81769	5.9668e-09	1.85427e-06
MGP_BALBcJ_G0025550__Ptges	3008.45	0.722936	0.125284	5.77036	7.91027e-09	2.41096e-06
MGP_BALBcJ_G0029706__Cxcl15	47.2327	2.27885	0.400309	5.69271	1.25038e-08	3.7391e-06
MGP_BALBcJ_G0016239__Ramp1	422.854	-1.31408	0.231713	-5.67114	1.41848e-08	4.16324e-06
MGP_BALBcJ_G0027370__Sema4a	713.07	0.861967	0.152152	5.66518	1.46868e-08	4.23221e-06
MGP_BALBcJ_G0035239__Slc38a3	133.214	-2.0463	0.363912	-5.62306	1.876e-08	5.30942e-06
MGP_BALBcJ_G0022366__Igfbp6	579.774	1.50867	0.269456	5.59892	2.15688e-08	5.99725e-06
MGP_BALBcJ_G0020566__Cxcl14	6160.77	0.586092	0.105903	5.53426	3.12541e-08	8.54046e-06
MGP_BALBcJ_G0030494__Snd1	5880.25	0.486569	0.0879863	5.53006	3.20127e-08	8.59948e-06
MGP_BALBcJ_G0016622__F5	658.845	1.16339	0.211036	5.51275	3.53261e-08	9.21805e-06
MGP_BALBcJ_G0028803__Zbtb8a	573.334	1.23956	0.224883	5.512	3.54786e-08	9.21805e-06
MGP_BALBcJ_G0020591__Spata31d1a	64.332	1.75047	0.318486	5.49623	3.87995e-08	9.91828e-06
MGP_BALBcJ_G0021156__Ero1l	2821.67	0.538619	0.0990183	5.43959	5.34027e-08	1.34346e-05
MGP_BALBcJ_G0029007__Klhdc7a	9782.62	-0.626942	0.115907	-5.40902	6.33713e-08	1.56933e-05
MGP_BALBcJ_G0023530__Tap2	2477.23	0.548371	0.102531	5.34835	8.87601e-08	2.13145e-05
MGP_BALBcJ_G0034335__4931406C07Rik	4109.26	0.379254	0.0708812	5.35056	8.76846e-08	2.13145e-05
MGP_BALBcJ_G0020490__Ogn	1243.41	1.84649	0.349217	5.28752	1.23984e-07	2.93287e-05
MGP_BALBcJ_G0021498__Sorbs3	1082.53	0.580602	0.110467	5.2559	1.47301e-07	3.4332e-05
MGP_BALBcJ_G0034708__Tmprss13	3092.87	-0.56795	0.108158	-5.25113	1.51173e-07	3.47237e-05
MGP_BALBcJ_G0028305__Lpar1	303.662	0.885554	0.16922	5.23316	1.66635e-07	3.77285e-05
MGP_BALBcJ_G0019535__Osr1	144.06	1.06086	0.203143	5.22225	1.76763e-07	3.94581e-05
MGP_BALBcJ_G0018557__Rabep1	1013.43	0.796568	0.152851	5.21142	1.87406e-07	4.06875e-05
MGP_BALBcJ_G0030141__Eln	2693.7	1.78867	0.343195	5.21183	1.86986e-07	4.06875e-05
MGP_BALBcJ_G0017252__Herc4	1131.55	-0.459472	0.0883211	-5.20229	1.96843e-07	4.17698e-05
MGP_BALBcJ_G0018532__Alox15	54.0054	2.43741	0.468737	5.19995	1.99345e-07	4.17698e-05
MGP_BALBcJ_G0028712__Mycl	65.7272	1.36839	0.263199	5.19906	2.00297e-07	4.17698e-05
MGP_BALBcJ_G0015799__Pi15	73.6912	2.18636	0.421186	5.19096	2.09208e-07	4.30616e-05
MGP_BALBcJ_G0033479__Rab11fip1	1734.3	-0.452004	0.0876816	-5.15506	2.53554e-07	5.15201e-05
MGP_BALBcJ_G0021075__Sema3g	528.615	0.507372	0.0987021	5.14044	2.74102e-07	5.49905e-05
MGP_BALBcJ_G0020549__Dbn1	279.795	0.986017	0.193212	5.10328	3.33813e-07	6.5316e-05
MGP_BALBcJ_G0029608__Rasl11b	444.972	3.04919	0.597252	5.10536	3.30157e-07	6.5316e-05
MGP_BALBcJ_G0029900__Tmem119	278.566	1.03876	0.204708	5.07432	3.88882e-07	7.51632e-05
MGP_BALBcJ_G0023585__Csnk2b	2605.04	0.389892	0.077381	5.0386	4.68948e-07	8.95465e-05
MGP_BALBcJ_G0031194__Tuba8	202.176	1.16393	0.231146	5.03547	4.76667e-07	8.99368e-05
MGP_BALBcJ_G0022941__App	15471	0.322822	0.0642674	5.02311	5.08424e-07	9.48001e-05
MGP_BALBcJ_G0030101__Adgrd1	388.957	1.04213	0.20787	5.01338	5.34823e-07	9.85628e-05
MGP_BALBcJ_G0018189__Adamts2	1062.64	1.33489	0.270603	4.93303	8.09618e-07	0.0001461
MGP_BALBcJ_G0028502__Dhcr24	288.612	1.02589	0.20798	4.93265	8.11205e-07	0.0001461
MGP_BALBcJ_G0025117__R3hcc1l	1092.23	-0.488835	0.100562	-4.86104	1.1677e-06	0.000207942
MGP_BALBcJ_G0031430__Plekha5	1183.01	-0.435147	0.0898631	-4.84233	1.28328e-06	0.000225985
MGP_BALBcJ_G0024406__Gramd3	966.789	-0.516394	0.107285	-4.81331	1.48454e-06	0.000258554
MGP_BALBcJ_G0025718__Cytip	2982.05	-1.01402	0.211666	-4.79065	1.66244e-06	0.000286391
MGP_BALBcJ_G0026874__Ncoa3	3128.7	-0.318555	0.0666329	-4.78074	1.74648e-06	0.000297634
MGP_BALBcJ_G0022725__Muc13	69.2194	1.75299	0.367622	4.76846	1.85635e-06	0.000312993
MGP_BALBcJ_G0029601__Ociad2	83.6248	1.05982	0.223323	4.74566	2.0783e-06	0.000346726
MGP_BALBcJ_G0017297__Susd2	87.3976	1.46698	0.309578	4.73865	2.1515e-06	0.000355199
MGP_BALBcJ_G0020432__Tmem14c	1667.07	0.326276	0.0690932	4.72227	2.3323e-06	0.00037838
MGP_BALBcJ_G0020941__Acox2	212.806	1.13755	0.240924	4.72163	2.33966e-06	0.00037838
MGP_BALBcJ_G0018172__Flt4	229.722	0.965477	0.204919	4.7115	2.45898e-06	0.000393661
MGP_BALBcJ_G0031494__2810474O19Rik	5744.23	0.650002	0.138171	4.70434	2.54686e-06	0.000403652
MGP_BALBcJ_G0017575__Slc5a8	10981.9	1.58886	0.338431	4.69479	2.66876e-06	0.000418784
MGP_BALBcJ_G0025024__Lipk	36.9368	1.74256	0.372342	4.68	2.8687e-06	0.000445745
MGP_BALBcJ_G0019124__Tubg1	415.03	0.542737	0.11633	4.66549	3.07877e-06	0.000469619
MGP_BALBcJ_G0025798__Itga6	12885.5	-0.62305	0.13355	-4.6653	3.0816e-06	0.000469619
MGP_BALBcJ_G0031118__Atp2b2	75.3113	-2.00685	0.430687	-4.65964	3.16765e-06	0.000478134
MGP_BALBcJ_G0026570__Rin2	8435.32	-0.616103	0.132431	-4.65227	3.28309e-06	0.000490883
MGP_BALBcJ_G0026200__Pax6	20.4598	3.50041	0.754578	4.63891	3.5026e-06	0.000516148
MGP_BALBcJ_G0027064__Pde7a	1903.06	-0.688169	0.148436	-4.63614	3.54976e-06	0.000516148
MGP_BALBcJ_G0031416__Rerg	14.7553	2.94106	0.634169	4.63767	3.52366e-06	0.000516148
MGP_BALBcJ_G0029624__C530008M17Rik	18.9829	2.05228	0.443147	4.63116	3.63627e-06	0.000523921
MGP_BALBcJ_G0002701__Gm15848	63.1459	1.53292	0.331156	4.62899	3.67453e-06	0.000524664
MGP_BALBcJ_G0023131__Dact2	704.232	0.690362	0.14969	4.61193	3.98942e-06	0.000564539
MGP_BALBcJ_G0000114__Igkv14-100	55.2414	-3.72331	0.808577	-4.60477	4.12924e-06	0.000579154
MGP_BALBcJ_G0025576__Dnm1	377.826	1.01617	0.221347	4.59087	4.41403e-06	0.000613667
MGP_BALBcJ_G0035793__Renbp	1208.76	0.513159	0.111923	4.58492	4.54156e-06	0.000625906
MGP_BALBcJ_G0020848__Pik3r1	24213.4	-0.370658	0.0808823	-4.58268	4.5905e-06	0.000627197
MGP_BALBcJ_G0016231__Ackr3	1644.44	-0.672304	0.14701	-4.57318	4.80385e-06	0.000648705
MGP_BALBcJ_G0030613__Ephb6	244.689	-1.05377	0.230481	-4.57205	4.82978e-06	0.000648705
MGP_BALBcJ_G0022146__Arhgap8	926.343	-0.406559	0.0891368	-4.56107	5.08944e-06	0.000675666
MGP_BALBcJ_G0029338__Kmt2c	3156.26	-0.350238	0.0768069	-4.55998	5.11578e-06	0.000675666
MGP_BALBcJ_G0023503__Cd320	544.638	0.779983	0.171325	4.55266	5.29722e-06	0.000693848
MGP_BALBcJ_G0027398__Trim46	281.806	-1.13189	0.249265	-4.54091	5.60122e-06	0.000727654
MGP_BALBcJ_G0016310__Phlpp1	760.007	-0.50039	0.110871	-4.51326	6.38381e-06	0.000809536
MGP_BALBcJ_G0017690__Lrrc10	35.2559	1.64286	0.363801	4.51582	6.30721e-06	0.000809536
MGP_BALBcJ_G0020020__Clmn	5332.91	-0.446728	0.0989818	-4.51323	6.38476e-06	0.000809536
MGP_BALBcJ_G0030998__Plxna1	4605.28	0.404864	0.0898547	4.50576	6.61359e-06	0.000831895
MGP_BALBcJ_G0018173__Scgb3a1	16.2885	3.8382	0.85316	4.49881	6.83351e-06	0.000846127
MGP_BALBcJ_G0021153__Ptger2	600.389	-0.88237	0.196119	-4.49915	6.82253e-06	0.000846127
MGP_BALBcJ_G0019561__Atp6v1c2	504.216	-1.22804	0.273267	-4.49391	6.9927e-06	0.000859126
MGP_BALBcJ_G0025490__Col5a1	2502.42	1.24645	0.278093	4.48214	7.38983e-06	0.000900934
MGP_BALBcJ_G0035932__Ogt	11251.8	-0.387846	0.0866387	-4.47659	7.58461e-06	0.000917622
MGP_BALBcJ_G0018530__Alox12	44.8759	2.89338	0.649916	4.45193	8.51014e-06	0.0010218
MGP_BALBcJ_G0018581__Spns2	5752.1	-0.555419	0.124973	-4.44432	8.81715e-06	0.00104682
MGP_BALBcJ_G0026360__Map1a	91.4549	1.23971	0.278995	4.4435	8.85065e-06	0.00104682
MGP_BALBcJ_G0021487__Loxl2	514.602	1.45298	0.327141	4.44145	8.93528e-06	0.001049
MGP_BALBcJ_G0033208__Eps8l2	2438.43	-0.567433	0.128004	-4.43293	9.29623e-06	0.00108335
MGP_BALBcJ_G0019096__Fkbp10	344.925	0.949059	0.214911	4.41606	1.00516e-05	0.00116283
MGP_BALBcJ_G0035128__Rbp1	4001.33	1.0229	0.233129	4.38773	1.14542e-05	0.00131549
MGP_BALBcJ_G0016058__Erbb4	67.8707	-1.41775	0.324101	-4.37441	1.21761e-05	0.00138834
MGP_BALBcJ_G0018353__Srebf1	5946.01	-1.00367	0.229841	-4.36678	1.2609e-05	0.00142576
MGP_BALBcJ_G0032288__Nav2	683.148	1.4085	0.322645	4.36548	1.26842e-05	0.00142576
MGP_BALBcJ_G0018897__Cacna1g	157.434	1.54414	0.355098	4.3485	1.37074e-05	0.00152992
MGP_BALBcJ_G0026147__Alx4	70.2691	1.77404	0.408392	4.34398	1.39925e-05	0.00155082
MGP_BALBcJ_G0017687__Rab3ip	2531.34	0.885221	0.204824	4.32186	1.54722e-05	0.00168225
MGP_BALBcJ_G0024941__Pcsk5	873.624	1.25737	0.290758	4.32445	1.52912e-05	0.00168225
MGP_BALBcJ_G0028596__Faah	316.559	0.902529	0.208846	4.32151	1.54967e-05	0.00168225
MGP_BALBcJ_G0023632__H2-Q4	241.607	1.83844	0.426026	4.31532	1.59375e-05	0.00170671
MGP_BALBcJ_G0028240__Coro2a	1050.19	-0.944486	0.218813	-4.3164	1.58592e-05	0.00170671
MGP_BALBcJ_G0019944__Galc	1843.67	0.51495	0.119713	4.30152	1.6963e-05	0.00179231
MGP_BALBcJ_G0031090__Srgap3	2176.77	-0.671018	0.155974	-4.30212	1.6917e-05	0.00179231
MGP_BALBcJ_G0021047__Wnt5a	964.532	1.45202	0.338327	4.29177	1.77253e-05	0.00186045
MGP_BALBcJ_G0018695__Myo18a	6436.9	0.546882	0.127917	4.27528	1.909e-05	0.00199051
MGP_BALBcJ_G0007154__Gm45055	23.3708	2.16305	0.50617	4.27336	1.92548e-05	0.00199457
MGP_BALBcJ_G0020586__NA	360.048	1.09516	0.256399	4.2713	1.94338e-05	0.00200004
MGP_BALBcJ_G0000117__Igkv10-96	2072.27	1.07836	0.253146	4.25984	2.04576e-05	0.00209107
MGP_BALBcJ_G0032879__Pik3c2a	2828.11	-0.674938	0.158493	-4.25848	2.05822e-05	0.00209107
MGP_BALBcJ_G0018377__Slc47a1	11.1242	-7.24283	1.70992	-4.23576	2.27775e-05	0.00229937
MGP_BALBcJ_G0032609__Trim68	1287.13	0.866133	0.204565	4.23403	2.29537e-05	0.00230248
MGP_BALBcJ_G0021629__Dock9	3511.73	-0.286294	0.0676829	-4.22993	2.33764e-05	0.00233014
MGP_BALBcJ_G0019114__NA	4010.44	0.870686	0.206642	4.21351	2.51432e-05	0.00249059
MGP_BALBcJ_G0029133__Car6	535.835	-0.87725	0.208517	-4.20708	2.58689e-05	0.00254562
MGP_BALBcJ_G0039793__NA	853.712	-0.562068	0.133642	-4.20577	2.602e-05	0.00254562
MGP_BALBcJ_G0026583__Thbd	665.656	0.891481	0.212372	4.19773	2.69603e-05	0.00262143
MGP_BALBcJ_G0028536__Gpx7	84.2712	1.22413	0.291977	4.19254	2.75848e-05	0.00266143
MGP_BALBcJ_G0035143__Mras	257.099	0.554789	0.132359	4.19153	2.77074e-05	0.00266143
MGP_BALBcJ_G0034684__Bcl9l	2095.59	-0.596835	0.142583	-4.18587	2.84074e-05	0.00271222
MGP_BALBcJ_G0032582__Numa1	5259.17	-0.365926	0.0876564	-4.17455	2.98579e-05	0.00283364
MGP_BALBcJ_G0015906__Il18r1	176.884	-1.60196	0.384245	-4.1691	3.05802e-05	0.00288492
MGP_BALBcJ_G0022660__Cldn1	885.206	0.861076	0.207387	4.15203	3.29541e-05	0.00309047
MGP_BALBcJ_G0018522__Mgl2	253.218	1.2372	0.299654	4.12875	3.64737e-05	0.00338053
MGP_BALBcJ_G0029441__Fam193a	1234.76	-0.311866	0.0755245	-4.12933	3.63824e-05	0.00338053
MGP_BALBcJ_G0034990__Nedd4	17445.5	-0.268582	0.0652754	-4.1146	3.87849e-05	0.00357385
MGP_BALBcJ_G0019589__Adi1	1507.64	0.443984	0.108018	4.11026	3.95206e-05	0.00360623
MGP_BALBcJ_G0021327__Tgm1	1198.14	-0.835579	0.203376	-4.10855	3.9815e-05	0.00360623
MGP_BALBcJ_G0029563__9130230L23Rik	68.7879	1.12014	0.272638	4.10853	3.98189e-05	0.00360623
MGP_BALBcJ_G0024143__Dsg3	18.305	4.37852	1.06652	4.10543	4.03562e-05	0.00363412
MGP_BALBcJ_G0027608__Gja5	95.6075	0.932168	0.227152	4.10373	4.06549e-05	0.00364034
MGP_BALBcJ_G0028755__Sh3d21	314.495	-0.465315	0.113462	-4.10107	4.11241e-05	0.00366166
MGP_BALBcJ_G0031498__Myadm	1390.1	0.650136	0.158669	4.09743	4.17754e-05	0.00369887
MGP_BALBcJ_G0030352__Cyp3a57	13.6594	3.39544	0.830538	4.08824	4.34654e-05	0.00382713
MGP_BALBcJ_G0019203__Map3k14	483.969	-0.474725	0.116274	-4.08281	4.44945e-05	0.00389198
MGP_BALBcJ_G0028773__Zmym1	263.783	-0.509233	0.124758	-4.08177	4.46931e-05	0.00389198
MGP_BALBcJ_G0020850__Mast4	5236.65	-0.694124	0.170445	-4.07242	4.65263e-05	0.00402949
MGP_BALBcJ_G0022034__Sox10	6625.35	-0.497075	0.122198	-4.06777	4.74653e-05	0.00408847
MGP_BALBcJ_G0022671__Atp13a5	61.6189	2.34383	0.577028	4.0619	4.86753e-05	0.00417002
MGP_BALBcJ_G0017527__Slc41a2	2841.13	0.493609	0.12209	4.043	5.27707e-05	0.00447586
MGP_BALBcJ_G0026910__Bcas1	47.4785	1.21318	0.300082	4.04283	5.281e-05	0.00447586
MGP_BALBcJ_G0019740__Map4k5	1173.55	-0.377121	0.0934462	-4.03571	5.44382e-05	0.00455442
MGP_BALBcJ_G0033849__Calr	30860.7	0.567073	0.140538	4.03501	5.4599e-05	0.00455442
MGP_BALBcJ_G0033914__Slc6a2	17.81	2.56728	0.63602	4.03648	5.42595e-05	0.00455442
MGP_BALBcJ_G0034138__Cdyl2	440.385	-0.593249	0.147138	-4.03192	5.53232e-05	0.00459067
MGP_BALBcJ_G0020700__Clptm1l	3718.54	0.288699	0.0716525	4.02915	5.59779e-05	0.0046141
MGP_BALBcJ_G0031055__Arl6ip5	2109.58	0.298308	0.0740536	4.02827	5.61879e-05	0.0046141
MGP_BALBcJ_G0022993__Tiam1	471.494	-0.529141	0.131411	-4.02663	5.6583e-05	0.00462259
MGP_BALBcJ_G0018212__N4bp3	500.615	0.662647	0.164679	4.02388	5.72476e-05	0.00465291
MGP_BALBcJ_G0026549__Kif16b	1490.79	0.319516	0.0795227	4.01792	5.87148e-05	0.0047389
MGP_BALBcJ_G0028495__1700024P16Rik	576.678	1.03591	0.257871	4.01716	5.89036e-05	0.0047389
MGP_BALBcJ_G0018926__Ngfr	109.96	2.0504	0.510762	4.01439	5.95987e-05	0.00477061
MGP_BALBcJ_G0030096__Fzd10	24.0338	2.41177	0.60145	4.00993	6.07361e-05	0.00483722
MGP_BALBcJ_G0019220__Itgb3	272.175	1.04644	0.261178	4.00662	6.15925e-05	0.0048809
MGP_BALBcJ_G0017488__Tjp3	1962.61	-0.511915	0.127866	-4.00353	6.24053e-05	0.0049207
MGP_BALBcJ_G0017326__Col6a1	4102.7	1.16154	0.290526	3.99805	6.38669e-05	0.00494618
MGP_BALBcJ_G0019109__Rab5c	3788.79	0.290331	0.0726256	3.99764	6.39767e-05	0.00494618
MGP_BALBcJ_G0019479__Sectm1a	2115.09	2.04734	0.512066	3.9982	6.38268e-05	0.00494618
MGP_BALBcJ_G0022995__Scaf4	1240.08	-0.37132	0.0928105	-4.00084	6.31193e-05	0.00494618
MGP_BALBcJ_G0032424__Homer2	601.482	-0.665768	0.166903	-3.98896	6.63639e-05	0.00510583
MGP_BALBcJ_G0019002__NA	820.342	-0.787067	0.197635	-3.98242	6.82158e-05	0.00522296
MGP_BALBcJ_G0021589__Lmo7	423.275	0.782968	0.196749	3.97953	6.90511e-05	0.0052615
MGP_BALBcJ_G0023187__Zfp160	545.236	-0.443163	0.111669	-3.96855	7.23121e-05	0.00547892
MGP_BALBcJ_G0030464__Cped1	488.31	0.593768	0.149654	3.96761	7.25959e-05	0.00547892
MGP_BALBcJ_G0032849__Lyve1	487.361	1.71796	0.433332	3.96454	7.35384e-05	0.00552374
MGP_BALBcJ_G0033379__Arhgef10	353.839	0.554729	0.140148	3.95816	7.55304e-05	0.00564661
MGP_BALBcJ_G0029038__NA	6926.19	-0.431714	0.109153	-3.95513	7.64918e-05	0.00569164
MGP_BALBcJ_G0027291__Fam198b	326.155	0.65249	0.16531	3.94708	7.91117e-05	0.00585907
MGP_BALBcJ_G0023042__Dscr3	993.763	0.316749	0.0802884	3.94514	7.97545e-05	0.00587921
MGP_BALBcJ_G0026161__Traf6	1671.83	-0.341235	0.0865785	-3.94134	8.10279e-05	0.00594542
MGP_BALBcJ_G0031811__Kcnn4	809.354	-0.649451	0.165017	-3.93565	8.29718e-05	0.00603221
MGP_BALBcJ_G0034402__S1pr2	1067.8	-0.676897	0.171954	-3.9365	8.26779e-05	0.00603221
MGP_BALBcJ_G0028230__Tmod1	40.1814	1.37231	0.349046	3.9316	8.43839e-05	0.00610685
MGP_BALBcJ_G0000047__Ighv5-15	42.6375	2.58604	0.658204	3.92893	8.53239e-05	0.00614681
MGP_BALBcJ_G0034081__Hp	24519.3	2.07399	0.528575	3.92373	8.71894e-05	0.00625278
MGP_BALBcJ_G0018880__Stxbp4	206.131	0.665464	0.169657	3.92242	8.76645e-05	0.00625854
MGP_BALBcJ_G0026496__Siglec1	1217.61	1.44334	0.369054	3.91092	9.19435e-05	0.00650541
MGP_BALBcJ_G0035902__Stard8	684.388	0.789687	0.201869	3.91188	9.15791e-05	0.00650541
MGP_BALBcJ_G0034864__6030419C18Rik	42.5754	1.6846	0.430937	3.90916	9.26172e-05	0.00652395
MGP_BALBcJ_G0023146__Lix1	125.741	1.19392	0.306127	3.90008	9.61596e-05	0.00674351
MGP_BALBcJ_G0019084__Krt15	85.2975	1.71087	0.438869	3.89836	9.68448e-05	0.00676164
MGP_BALBcJ_G0021876__Ndrg1	36301.4	-0.505146	0.129874	-3.88951	0.000100445	0.00698226
MGP_BALBcJ_G0002283__NA	179.531	-0.724026	0.186201	-3.88842	0.0001009	0.00698325
MGP_BALBcJ_G0017325__Col6a2	3637.78	1.15955	0.299205	3.87544	0.000106433	0.00733415
MGP_BALBcJ_G0025525__Pkn3	242.344	0.562873	0.14548	3.86909	0.000109244	0.00749528
MGP_BALBcJ_G0025359__Arhgap21	2833.65	-0.48008	0.12423	-3.86445	0.00011134	0.00760615
MGP_BALBcJ_G0022387__NA	3966.75	-0.320946	0.0832027	-3.85739	0.000114603	0.00779546
MGP_BALBcJ_G0018087__Gabrp	64.7726	1.88682	0.489487	3.85469	0.000115876	0.00781688
MGP_BALBcJ_G0019628__Ahr	1231.57	-0.578594	0.150104	-3.85463	0.000115904	0.00781688
MGP_BALBcJ_G0006839__5930430L01Rik	195.554	0.594726	0.15444	3.85085	0.000117707	0.0078715
MGP_BALBcJ_G0029157__Gpr153	352.976	0.7528	0.195489	3.85085	0.000117707	0.0078715
MGP_BALBcJ_G0021903__Ly6d	75.7135	2.71462	0.705209	3.84938	0.000118415	0.00788554
MGP_BALBcJ_G0019363__Evpl	370.441	-0.956732	0.249623	-3.83271	0.000126742	0.00840472
MGP_BALBcJ_G0016917__Esr1	1071.57	-0.653855	0.17075	-3.8293	0.000128508	0.00845111
MGP_BALBcJ_G0029838__Idua	478.225	0.506711	0.132323	3.82935	0.000128482	0.00845111
MGP_BALBcJ_G0024251__Cd14	44348.5	-0.606137	0.158493	-3.82439	0.000131096	0.00858573
MGP_BALBcJ_G0025486__Vav2	1917.75	-0.715764	0.187496	-3.81748	0.000134821	0.00879236
MGP_BALBcJ_G0035420__Lyzl4	212.563	1.23313	0.323105	3.81649	0.000135361	0.00879236
MGP_BALBcJ_G0016930__Lrp11	128.273	1.09706	0.287682	3.81345	0.000137038	0.00886495
MGP_BALBcJ_G0019361__Acox1	7700.42	0.423654	0.111302	3.80634	0.00014104	0.0089773
MGP_BALBcJ_G0021821__Deptor	9250.85	-0.619911	0.162853	-3.80657	0.000140908	0.0089773
MGP_BALBcJ_G0024472__Nedd4l	3685.67	-0.459001	0.120501	-3.80912	0.000139462	0.0089773
MGP_BALBcJ_G0028796__Fndc5	150.624	2.16654	0.568899	3.8083	0.000139928	0.0089773
MGP_BALBcJ_G0035483__Clcn5	995.808	0.473676	0.124493	3.80483	0.000141903	0.00899607
MGP_BALBcJ_G0027245__Tiparp	877.332	0.724658	0.191366	3.78676	0.000152622	0.00963707
MGP_BALBcJ_G0034857__Stra6	53.4955	3.10468	0.820267	3.78496	0.000153735	0.00966884
MGP_BALBcJ_G0020589__Golm1	3357.41	0.563667	0.148971	3.78373	0.000154498	0.00967844
MGP_BALBcJ_G0015756__Rb1cc1	2355.62	-0.386081	0.102114	-3.7809	0.000156265	0.00971235
MGP_BALBcJ_G0020912__Parp8	279.794	0.587766	0.155418	3.78183	0.000155677	0.00971235
MGP_BALBcJ_G0024953__Gda	12560.1	-0.682188	0.180909	-3.77088	0.000162674	0.010032
MGP_BALBcJ_G0028602__Lurap1	297.029	-0.639384	0.169552	-3.77102	0.00016258	0.010032
MGP_BALBcJ_G0022296__Bcdin3d	61.5041	-1.02828	0.273242	-3.76325	0.000167723	0.0103032
MGP_BALBcJ_G0024394__Lox	2141.44	1.32402	0.351999	3.76143	0.000168946	0.0103383
MGP_BALBcJ_G0018227__Hspa4	5895.45	0.455694	0.121276	3.7575	0.00017162	0.0104534
MGP_BALBcJ_G0034813__Nrg4	108.83	-1.00697	0.268045	-3.75673	0.000172146	0.0104534
MGP_BALBcJ_G0027530__NA	760.446	-0.651519	0.173612	-3.75272	0.000174923	0.0105413
MGP_BALBcJ_G0032333__Tjp1	4451.5	-0.314345	0.0837551	-3.75315	0.00017463	0.0105413
MGP_BALBcJ_G0024421__Adamts19	21.2974	2.25188	0.600313	3.75118	0.000176006	0.0105664
MGP_BALBcJ_G0018063__Stc2	333.239	0.816481	0.217914	3.7468	0.000179107	0.0106717
MGP_BALBcJ_G0025295__Camk1d	316.627	0.811138	0.216458	3.74732	0.000178731	0.0106717
MGP_BALBcJ_G0023059__Bace2	387.74	1.36281	0.363836	3.74566	0.000179917	0.0106798
MGP_BALBcJ_G0017691__Cct2	5625.43	0.205832	0.0550001	3.7424	0.000182272	0.0107107
MGP_BALBcJ_G0023061__Fam3b	9.13631	3.36704	0.899766	3.74213	0.000182465	0.0107107
MGP_BALBcJ_G0029728__Scarb2	11091.2	0.335334	0.089604	3.7424	0.000182273	0.0107107
MGP_BALBcJ_G0028570__Trabd2b	129.305	1.049	0.280482	3.73998	0.000184033	0.0107629
MGP_BALBcJ_G0024595__Chka	7163.21	0.742885	0.198869	3.73556	0.000187301	0.0109137
MGP_BALBcJ_G0020117__Zfp386	1020.93	-0.504604	0.135152	-3.73362	0.000188748	0.0109367
MGP_BALBcJ_G0028966__Hspg2	6052.39	0.582526	0.15604	3.73318	0.000189076	0.0109367
MGP_BALBcJ_G0022441__Ubald1	1387.75	-0.404992	0.108512	-3.73222	0.0001898	0.0109387
MGP_BALBcJ_G0030992__Mgll	10446.7	0.462153	0.123919	3.72948	0.000191874	0.0110181
MGP_BALBcJ_G0019123__Fam134c	4306.29	0.491276	0.131768	3.72833	0.00019275	0.0110285
MGP_BALBcJ_G0022859__Tmem45a	91.0095	1.33721	0.358761	3.72731	0.000193536	0.0110336
MGP_BALBcJ_G0016967__Cited2	4242.01	-0.962382	0.258445	-3.72373	0.000196299	0.0111511
MGP_BALBcJ_G0025323__Itga8	9665.08	-0.518824	0.139388	-3.72217	0.000197521	0.0111804
MGP_BALBcJ_G0034651__Arhgef12	3983.29	-0.275815	0.0741222	-3.72108	0.000198373	0.0111887
MGP_BALBcJ_G0022575__Arvcf	595.851	-0.592227	0.159634	-3.70991	0.000207335	0.0116526
MGP_BALBcJ_G0032073__Rhpn2	3364.66	0.400378	0.108014	3.70672	0.000209959	0.0117584
MGP_BALBcJ_G0019210__Wnt9b	24.5769	2.26897	0.612394	3.70508	0.000211325	0.0117933
MGP_BALBcJ_G0017686__Myrfl	22.455	1.72258	0.465403	3.70126	0.000214532	0.0118928
MGP_BALBcJ_G0019291__Slc39a11	1335.98	0.322722	0.0871947	3.70117	0.00021461	0.0118928
MGP_BALBcJ_G0001921__NA	62.5618	-0.934835	0.253122	-3.69322	0.000221429	0.012228
MGP_BALBcJ_G0023129__Mllt4	5539.31	-0.406142	0.11007	-3.68985	0.000224386	0.0123482
MGP_BALBcJ_G0019177__Grn	11372.9	0.363322	0.0985486	3.68673	0.00022715	0.0124338
MGP_BALBcJ_G0035291__Col7a1	530.046	0.754565	0.204693	3.68633	0.00022751	0.0124338
MGP_BALBcJ_G0026895__Ptpn1	2736.87	0.285886	0.0776214	3.68309	0.000230427	0.01255
MGP_BALBcJ_G0028759__Col8a2	23.1488	2.22376	0.604576	3.67821	0.000234873	0.0127483
MGP_BALBcJ_G0024930__Tle4	379.845	-0.488141	0.132866	-3.67394	0.000238838	0.0129193
MGP_BALBcJ_G0019036__Krt23	31.2334	1.63321	0.445469	3.66628	0.000246108	0.0132222
MGP_BALBcJ_G0031187__Cecr2	574.917	-0.624424	0.170282	-3.667	0.000245417	0.0132222
MGP_BALBcJ_G0035047__Senp6	2099.3	-0.313695	0.0858085	-3.65576	0.00025642	0.0137297
MGP_BALBcJ_G0025304__Usp6nl	1496.15	-0.345701	0.0946683	-3.65171	0.000260497	0.0139011
MGP_BALBcJ_G0021361__Zmym2	2305.44	-0.341711	0.0937869	-3.64348	0.00026898	0.0143056
MGP_BALBcJ_G0027748__Celsr2	10032.8	-0.456284	0.12528	-3.6421	0.00027042	0.014332
MGP_BALBcJ_G0032576__Folr2	357.204	1.0524	0.28902	3.64128	0.000271285	0.014332
MGP_BALBcJ_G0022672__Atp13a4	1396.8	-1.10506	0.304852	-3.62492	0.000289049	0.0152096
MGP_BALBcJ_G0024125__Impact	1098.57	0.284732	0.0785633	3.62424	0.000289816	0.0152096
MGP_BALBcJ_G0028820__Khdrbs1	1787.77	-0.433005	0.119536	-3.62239	0.000291898	0.0152683
MGP_BALBcJ_G0033094__Chst15	363.856	0.529774	0.146325	3.62053	0.000294	0.0153277
MGP_BALBcJ_G0024528__Rpl17	6484.25	-0.209626	0.0579563	-3.61698	0.000298064	0.015438
MGP_BALBcJ_G0030628__Casp2	1208.39	-0.608351	0.168191	-3.61703	0.000298004	0.015438
MGP_BALBcJ_G0031191__Bid	492.939	0.669553	0.18569	3.60576	0.000311246	0.0160682
MGP_BALBcJ_G0033363__Gas6	7829.72	0.547221	0.151863	3.60338	0.0003141	0.0161629
MGP_BALBcJ_G0016654__Aldh9a1	2568.53	0.452633	0.125748	3.59953	0.000318794	0.0163361
MGP_BALBcJ_G0016856__Tgfb2	785.296	0.685471	0.190465	3.59893	0.000319527	0.0163361
MGP_BALBcJ_G0016240__Ube2f	3137.89	-0.378636	0.105253	-3.59738	0.00032144	0.016381
MGP_BALBcJ_G0022171__Brd1	2327.14	-0.298702	0.0831072	-3.59418	0.000325418	0.0165306
MGP_BALBcJ_G0030496__Lep	505.257	1.14736	0.319789	3.58788	0.00033338	0.0168809
MGP_BALBcJ_G0033785__Zfp827	562.08	0.673032	0.187642	3.5868	0.000334767	0.0168972
MGP_BALBcJ_G0033079__Htra1	599.439	1.27663	0.356129	3.58473	0.000337425	0.0169773
MGP_BALBcJ_G0018211__Rmnd5b	998.969	0.374004	0.104599	3.57561	0.000349407	0.0175245
MGP_BALBcJ_G0031457__Bcat1	86.7264	1.3588	0.380243	3.5735	0.000352243	0.017611
MGP_BALBcJ_G0024935__Gna14	318.845	-0.832518	0.233106	-3.57141	0.000355066	0.0176677
MGP_BALBcJ_G0027110__Zfp639	715.318	-0.290768	0.0814246	-3.57101	0.000355605	0.0176677
MGP_BALBcJ_G0021705__Pdzd2	1417.17	-0.394127	0.110417	-3.56943	0.000357764	0.0177194
MGP_BALBcJ_G0005949__BC016548	323.175	-0.525812	0.147509	-3.5646	0.000364406	0.0178255
MGP_BALBcJ_G0023358__Arhgdig	16.084	2.1239	0.59576	3.56503	0.000363818	0.0178255
MGP_BALBcJ_G0025093__Pik3ap1	690.516	1.08944	0.305486	3.56626	0.000362109	0.0178255
MGP_BALBcJ_G0028827__Tinagl1	1934.93	0.44044	0.123528	3.56549	0.000363172	0.0178255
MGP_BALBcJ_G0026403__Fbn1	4709.88	1.20379	0.337963	3.5619	0.000368181	0.0179548
MGP_BALBcJ_G0019478__Sectm1b	2790.62	1.76679	0.496188	3.56072	0.000369832	0.0179569
MGP_BALBcJ_G0020509__Nfil3	1100.94	0.750865	0.210902	3.56026	0.000370491	0.0179569
MGP_BALBcJ_G0034004__B3gnt9	81.9626	1.07528	0.302148	3.55876	0.000372603	0.0180042
MGP_BALBcJ_G0018593__P2rx5	178.029	0.875884	0.246436	3.55421	0.00037912	0.0181798
MGP_BALBcJ_G0020420__Dsp	1265.14	0.559773	0.157496	3.55421	0.000379112	0.0181798
MGP_BALBcJ_G0026896__Fam65c	114.956	0.706579	0.198822	3.55382	0.000379679	0.0181798
MGP_BALBcJ_G0017401__Palm	340.771	0.559082	0.157405	3.55188	0.000382491	0.0182593
MGP_BALBcJ_G0036092__Rnf128	1138.01	0.623916	0.175839	3.54821	0.000387855	0.0184598
MGP_BALBcJ_G0023734__Adgrf1	590.677	-1.10813	0.312501	-3.54599	0.000391137	0.0185603
MGP_BALBcJ_G0027289__Rxfp1	16.4555	3.51441	0.991576	3.54427	0.000393702	0.0186262
MGP_BALBcJ_G0029970__Rnft2	64.5973	1.13625	0.320899	3.54082	0.000398883	0.0188152
MGP_BALBcJ_G0034233__Rhou	5396.84	-0.469769	0.13274	-3.53902	0.000401623	0.0188882
MGP_BALBcJ_G0025482__Adamtsl2	33.3749	1.78202	0.504232	3.53412	0.000409129	0.0191843
MGP_BALBcJ_G0020089__Aspg	132.288	-1.06601	0.30197	-3.53017	0.00041529	0.0193586
MGP_BALBcJ_G0023272__Pkd1	2698.83	-0.22173	0.0628018	-3.53064	0.000414557	0.0193586
MGP_BALBcJ_G0024836__Ms4a8a	37.288	1.23234	0.349517	3.52584	0.000422149	0.0196206
MGP_BALBcJ_G0023885__Ptprs	1549.76	0.520322	0.14777	3.52115	0.000429674	0.019912
MGP_BALBcJ_G0016586__Rc3h1	2190.84	-0.385568	0.109563	-3.51914	0.000432944	0.020005
MGP_BALBcJ_G0028246__Tgfbr1	2199.91	-0.459633	0.130689	-3.51699	0.000436477	0.0201096
MGP_BALBcJ_G0030412__NA	43.3125	1.33395	0.379512	3.51491	0.000439899	0.0202086
MGP_BALBcJ_G0019826__Galnt16	145.17	0.928977	0.264456	3.51278	0.000443449	0.0203128
MGP_BALBcJ_G0018326__Trim11	2181.83	-0.423882	0.12071	-3.51157	0.000445461	0.0203461
MGP_BALBcJ_G0018275__Gria1	8.25241	2.82591	0.805344	3.50895	0.000449876	0.0204887
MGP_BALBcJ_G0003900__Ttc39aos1	238.452	-0.917922	0.26176	-3.50673	0.000453653	0.0206016
MGP_BALBcJ_G0028909__Pafah2	769.342	0.514626	0.146875	3.50383	0.00045862	0.0207676
MGP_BALBcJ_G0015260__Crybg3	301.221	-0.656401	0.187423	-3.50225	0.000461344	0.0208314
MGP_BALBcJ_G0034862__Loxl1	966.763	0.894799	0.255752	3.49869	0.000467549	0.0210517
MGP_BALBcJ_G0017827__Cd63	6881.1	0.465539	0.133183	3.4955	0.000473181	0.0212407
MGP_BALBcJ_G0033537__Mtus1	3435.45	-0.364053	0.10417	-3.49479	0.000474428	0.0212407
MGP_BALBcJ_G0034686__Ddx6	5473.84	-0.220815	0.0632474	-3.49129	0.000480694	0.0214606
MGP_BALBcJ_G0017973__Adcy1	15.27	2.35914	0.676599	3.48676	0.000488901	0.0217657
MGP_BALBcJ_G0021497__Pdlim2	129.015	0.622202	0.178651	3.48277	0.000496248	0.0220309
MGP_BALBcJ_G0016892__Sertad4	1031.88	-0.709953	0.204174	-3.4772	0.000506687	0.0223803
MGP_BALBcJ_G0019763__Lrrc9	15.2043	2.15965	0.621115	3.47706	0.000506942	0.0223803
MGP_BALBcJ_G0026956__Taf4	852.44	-0.390422	0.112322	-3.47591	0.000509131	0.0224145
MGP_BALBcJ_G0003336__NA	243.906	-0.639821	0.184272	-3.47216	0.000516287	0.0226666
MGP_BALBcJ_G0028262__Zfp189	158.089	-0.513337	0.14788	-3.47132	0.000517911	0.0226751
MGP_BALBcJ_G0030848__St3gal5	61.0209	0.857175	0.247405	3.46466	0.000530908	0.02318
MGP_BALBcJ_G0036130__Amot	485.689	-1.0103	0.291797	-3.46234	0.000535499	0.0233163
MGP_BALBcJ_G0028676__P3h1	519.57	0.563025	0.162926	3.45571	0.000548854	0.0238323
MGP_BALBcJ_G0018658__Pitpna	5400.43	0.339708	0.098377	3.45313	0.000554125	0.0238363
MGP_BALBcJ_G0020527__Cdhr2	491.168	0.928245	0.26882	3.45304	0.000554313	0.0238363
MGP_BALBcJ_G0028330__Slc31a1	2902.31	-0.284791	0.0824831	-3.45272	0.000554962	0.0238363
MGP_BALBcJ_G0035851__Dmd	915.284	-0.498534	0.144359	-3.45343	0.000553501	0.0238363
MGP_BALBcJ_G0022316__Slc11a2	1595.61	0.39869	0.115568	3.44983	0.000560949	0.0240283
MGP_BALBcJ_G0027030__Zfp704	3509.42	-0.486865	0.141241	-3.44706	0.000566717	0.02421
MGP_BALBcJ_G0020834__Naip2	297.429	0.420545	0.122305	3.43849	0.000584961	0.0249222
MGP_BALBcJ_G0029712__Areg	50.5389	2.75939	0.803274	3.43518	0.000592159	0.0251612
MGP_BALBcJ_G0020065__Tecpr2	1136.78	-0.433889	0.12648	-3.43049	0.000602482	0.0253665
MGP_BALBcJ_G0021233__Rnase1	5225.25	1.0417	0.30376	3.42937	0.000604994	0.0253665
MGP_BALBcJ_G0028455__Kank4	86.077	1.0936	0.318846	3.42986	0.000603895	0.0253665
MGP_BALBcJ_G0033905__Aktip	1594.76	-0.538289	0.156937	-3.42997	0.000603637	0.0253665
MGP_BALBcJ_G0035836__Tbl1x	2882.5	-0.328654	0.0957995	-3.43065	0.000602143	0.0253665
MGP_BALBcJ_G0000058__NA	7.98032	5.00945	1.46138	3.42789	0.000608288	0.0253704
MGP_BALBcJ_G0022514__Snai2	209.22	0.753557	0.219789	3.42855	0.000606812	0.0253704
MGP_BALBcJ_G0026911__Cyp24a1	3396.58	1.97266	0.575998	3.42478	0.000615306	0.0255288
MGP_BALBcJ_G0029014__Padi1	26.9064	1.23361	0.360187	3.42492	0.000614976	0.0255288
MGP_BALBcJ_G0019000__Erbb2	1577.15	-0.489763	0.143448	-3.41421	0.000639669	0.0264703
MGP_BALBcJ_G0015893__Npas2	546.075	-1.24949	0.366332	-3.41082	0.000647667	0.026662
MGP_BALBcJ_G0021642__Tmtc4	683.481	-0.499848	0.146534	-3.41114	0.000646917	0.026662
MGP_BALBcJ_G0017296__Ggt5	436.516	1.12471	0.330031	3.4079	0.000654651	0.0268103
MGP_BALBcJ_G0022348__Krt6a	75.3742	1.65583	0.485836	3.4082	0.000653926	0.0268103
MGP_BALBcJ_G0034401__Dnmt1	2840.15	-0.384671	0.112928	-3.40633	0.00065843	0.0268955
MGP_BALBcJ_G0026939__Npepl1	1485.98	-0.287606	0.0845108	-3.40318	0.000666059	0.0271372
MGP_BALBcJ_G0025330__Vim	5009.98	0.705275	0.207536	3.39833	0.000677996	0.0275527
MGP_BALBcJ_G0022359__Krt79	40.7613	1.99956	0.589357	3.39277	0.00069189	0.0280454
MGP_BALBcJ_G0000006__Ighg2b	109.385	1.60937	0.474885	3.38896	0.000701586	0.0283393
MGP_BALBcJ_G0032359__Rgma	874.051	-0.528544	0.155981	-3.38852	0.000702716	0.0283393
MGP_BALBcJ_G0018352__Rai1	1476.03	-0.255213	0.0753856	-3.38544	0.000710643	0.0285862
MGP_BALBcJ_G0017421__Sbno2	6361.1	-0.443431	0.13111	-3.38213	0.000719269	0.0287817
MGP_BALBcJ_G0020506__Diras2	24.8206	1.58862	0.46964	3.38263	0.000717957	0.0287817
MGP_BALBcJ_G0020883__Mier3	826.783	-0.327476	0.096844	-3.38149	0.000720951	0.0287817
MGP_BALBcJ_G0022901__Crybg3	1080.24	-0.470404	0.13917	-3.38007	0.000724666	0.0288574
MGP_BALBcJ_G0016981__Ifngr1	2119.89	-0.417246	0.123483	-3.37899	0.000727539	0.0288991
MGP_BALBcJ_G0021145__Fam213a	844.101	-0.452906	0.13413	-3.37661	0.000733851	0.029077
MGP_BALBcJ_G0019289__Kcnj2	1041.93	-0.840055	0.248861	-3.3756	0.000736549	0.0291032
MGP_BALBcJ_G0023626__H2-T24	356.447	0.629537	0.18653	3.37499	0.000738185	0.0291032
MGP_BALBcJ_G0022911__NA	682.177	-0.349909	0.103721	-3.37357	0.000742003	0.0291811
MGP_BALBcJ_G0028309__Ptgr1	334.306	0.756362	0.224385	3.37082	0.000749448	0.029401
MGP_BALBcJ_G0021667__Osmr	7661.63	-0.470499	0.139645	-3.36925	0.000753727	0.0294958
MGP_BALBcJ_G0029430__Letm1	1579.59	0.290037	0.0862904	3.36117	0.000776132	0.0302978
MGP_BALBcJ_G0034693__Kmt2a	3943.4	-0.325062	0.0967662	-3.35925	0.000781544	0.0304341
MGP_BALBcJ_G0028421__Mtap	815.468	0.373074	0.111094	3.35818	0.000784566	0.0304769
MGP_BALBcJ_G0031251__P3h3	313.449	0.576053	0.171676	3.35546	0.000792345	0.0307038
MGP_BALBcJ_G0028279__Slc44a1	4019.63	-0.286271	0.0853485	-3.35413	0.000796136	0.0307755
MGP_BALBcJ_G0024659__Rab1b	3281.05	0.256076	0.0763822	3.35256	0.000800685	0.0308011
MGP_BALBcJ_G0029966__Fbxo21	249.464	-0.706811	0.210799	-3.35302	0.00079936	0.0308011
MGP_BALBcJ_G0015527__Gm13648	357.603	-0.712133	0.212501	-3.35119	0.00080465	0.0308041
MGP_BALBcJ_G0035814__G6pdx	4197.78	0.388037	0.11579	3.35121	0.000804598	0.0308041
MGP_BALBcJ_G0030388__B3glct	406.207	0.457323	0.136587	3.34822	0.000813335	0.0310616
MGP_BALBcJ_G0017467__Timm13	909.913	0.235268	0.0703165	3.34584	0.000820337	0.0311323
MGP_BALBcJ_G0023873__Plin4	4288.51	0.631565	0.188776	3.34559	0.00082108	0.0311323
MGP_BALBcJ_G0025272__NA	13915.4	0.452293	0.135166	3.3462	0.000819279	0.0311323
MGP_BALBcJ_G0021811__Samd12	37.2294	1.30609	0.390488	3.34476	0.000823529	0.0311506
MGP_BALBcJ_G0026805__Wisp2	1966.03	1.71482	0.512869	3.34358	0.000827057	0.0312096
MGP_BALBcJ_G0025161__Fbxw4	1421.16	-0.383091	0.114627	-3.34206	0.000831588	0.031306
MGP_BALBcJ_G0016022__Ino80d	355.946	-0.455229	0.136418	-3.33702	0.000846827	0.031729
MGP_BALBcJ_G0028754__Eva1b	421.648	-0.721392	0.216165	-3.33722	0.000846202	0.031729
MGP_BALBcJ_G0034456__Rp9	1049.13	-0.436273	0.130841	-3.33437	0.000854926	0.0319569
MGP_BALBcJ_G0027677__NA	1135.75	-0.504883	0.151492	-3.33273	0.000859986	0.0320704
MGP_BALBcJ_G0020690__Adamts16	8.1801	3.26512	0.980608	3.32969	0.000869437	0.0323467
MGP_BALBcJ_G0019280__Fam20a	1572.57	-1.06948	0.321266	-3.32896	0.000871723	0.0323558
MGP_BALBcJ_G0033871__Man2b1	4127.52	0.404876	0.121677	3.32747	0.000876385	0.0324529
MGP_BALBcJ_G0021017__Zmiz1	13003.9	0.523943	0.157509	3.32644	0.000879635	0.0324973
MGP_BALBcJ_G0033354__Lamp1	21432.7	0.373659	0.11237	3.32525	0.000883384	0.0325599
MGP_BALBcJ_G0020414__F13a1	2022.8	1.06155	0.319324	3.32435	0.000886246	0.0325896
MGP_BALBcJ_G0029419__Spon2	332.591	1.26612	0.381275	3.32076	0.000897728	0.0329354
MGP_BALBcJ_G0022868__Dcbld2	448.504	0.415851	0.125282	3.31933	0.000902338	0.0330281
MGP_BALBcJ_G0015555__1810059H22Rik	37.3377	1.11727	0.336963	3.31571	0.000914104	0.0333816
MGP_BALBcJ_G0035371__Cmtm8	620.744	-0.412182	0.124413	-3.31301	0.000922982	0.0336284
MGP_BALBcJ_G0023920__Trip10	1556.68	-0.547788	0.165395	-3.31199	0.000926334	0.0336731
MGP_BALBcJ_G0027665__Trim33	1553.52	-0.298881	0.0903774	-3.30704	0.000942882	0.0341962
MGP_BALBcJ_G0024575__Cyb5a	1195.25	-0.449902	0.136085	-3.30603	0.000946267	0.0342406
MGP_BALBcJ_G0024152__Garem	1054.93	-0.833443	0.252269	-3.30379	0.000953867	0.034437
MGP_BALBcJ_G0020488__Aspn	288.347	1.08935	0.329793	3.30311	0.000956176	0.0344419
MGP_BALBcJ_G0016474__Pkp1	312.037	0.898261	0.272167	3.30041	0.000965442	0.0345531
MGP_BALBcJ_G0027108__Pik3ca	2392.31	-0.277306	0.0840049	-3.30107	0.000963171	0.0345531
MGP_BALBcJ_G0029935__Mlec	8044.65	0.504441	0.152847	3.3003	0.000965805	0.0345531
MGP_BALBcJ_G0017720__Gns	10134.5	0.319753	0.0970857	3.29351	0.000989446	0.0352516
MGP_BALBcJ_G0023256__Atp6v0c	2478.93	0.443992	0.13482	3.29323	0.000990439	0.0352516
MGP_BALBcJ_G0025358__Etl4	3054.24	-0.380012	0.11543	-3.29216	0.000994224	0.0352516
MGP_BALBcJ_G0026337__Pla2g4f	111.349	1.13436	0.344525	3.29253	0.0009929	0.0352516
MGP_BALBcJ_G0035418__Trak1	2688.61	-0.264914	0.0805514	-3.28875	0.00100632	0.0356008
MGP_BALBcJ_G0020186__Arid4b	2069.51	-0.279338	0.0850067	-3.28607	0.00101597	0.0358621
MGP_BALBcJ_G0015587__NA	8.39561	2.74802	0.836446	3.28535	0.00101856	0.0358736
MGP_BALBcJ_G0034747__Ncam1	24.206	1.94159	0.591177	3.28429	0.00102241	0.0359293
MGP_BALBcJ_G0019101__Ttc25	67.9954	-1.34128	0.40855	-3.28304	0.00102695	0.0359441
MGP_BALBcJ_G0025022__NA	62.274	0.782245	0.238277	3.28292	0.00102736	0.0359441
MGP_BALBcJ_G0000124__Igkv12-89	23.9833	-2.61285	0.79658	-3.28008	0.00103778	0.0359907
MGP_BALBcJ_G0015177__Rian	346.317	1.15481	0.352062	3.28014	0.00103754	0.0359907
MGP_BALBcJ_G0022905__Arl13b	650.271	-0.481048	0.146631	-3.28067	0.00103559	0.0359907
MGP_BALBcJ_G0035954__Chic1	86.7413	0.962718	0.293469	3.28048	0.00103631	0.0359907
MGP_BALBcJ_G0029972__Med13l	3269.13	-0.489764	0.14939	-3.27842	0.00104389	0.0361236
MGP_BALBcJ_G0019529__Pum2	4383.93	-0.291627	0.0889848	-3.27727	0.00104816	0.0361923
MGP_BALBcJ_G0033908__Irx3	1150.83	-0.46064	0.140595	-3.27636	0.00105156	0.0362307
MGP_BALBcJ_G0021504__Bmp1	986.317	0.658271	0.200994	3.27507	0.00105635	0.0363169
MGP_BALBcJ_G0024693__Ltbp3	7359.48	0.447397	0.136758	3.27145	0.00106996	0.0367051
MGP_BALBcJ_G0002821__Gm26947	19.2605	1.45028	0.443424	3.27063	0.00107307	0.0367323
MGP_BALBcJ_G0016537__Lamc1	3826.83	0.288647	0.0883039	3.26879	0.00108008	0.0368351
MGP_BALBcJ_G0026876__Prex1	939.177	0.430331	0.131655	3.26862	0.00108072	0.0368351
MGP_BALBcJ_G0019618__Atxn7l1	826.311	0.31718	0.0970608	3.26785	0.00108369	0.0368572
MGP_BALBcJ_G0027244__Ssr3	8072.91	0.403851	0.123637	3.26643	0.00108911	0.0368831
MGP_BALBcJ_G0033202__Irf7	517.883	0.428031	0.131024	3.26681	0.00108765	0.0368831
MGP_BALBcJ_G0005703__B230354K17Rik	384.013	-0.365237	0.111867	-3.26492	0.00109496	0.0369234
MGP_BALBcJ_G0017009__Tbpl1	570.294	-0.374069	0.114564	-3.26514	0.0010941	0.0369234
MGP_BALBcJ_G0035027__Gclc	1344.94	-0.267712	0.0820607	-3.26236	0.00110487	0.0371785
MGP_BALBcJ_G0028437__Jun	1451.67	-1.56331	0.479535	-3.26006	0.00111389	0.0374026
MGP_BALBcJ_G0032218__Nucb1	3018.5	0.37251	0.114371	3.25704	0.00112581	0.0377229
MGP_BALBcJ_G0027810__Fnbp1l	2866.31	-0.454004	0.139494	-3.25465	0.00113532	0.0379125
MGP_BALBcJ_G0034242__Galnt2	3107.98	-0.359778	0.110551	-3.25442	0.00113625	0.0379125
MGP_BALBcJ_G0025387__Zmynd19	431.874	-0.521006	0.160208	-3.25206	0.00114573	0.0381389
MGP_BALBcJ_G0027334__Cd5l	9.46238	2.68583	0.826021	3.25153	0.00114785	0.0381389
MGP_BALBcJ_G0033482__Eif4ebp1	1201.23	-0.511639	0.157385	-3.25088	0.00115047	0.0381461
MGP_BALBcJ_G0003718__Gm16206	39.8546	-1.49856	0.461775	-3.24523	0.00117356	0.0388305
MGP_BALBcJ_G0031890__Ltbp4	444.732	0.409837	0.126315	3.24457	0.00117627	0.0388389
MGP_BALBcJ_G0018271__Atox1	3250.31	0.31607	0.0974468	3.24351	0.00118065	0.0389025
MGP_BALBcJ_G0021317__Rnf31	934.162	-0.441881	0.13628	-3.24246	0.00118504	0.038966
MGP_BALBcJ_G0017632__Kitl	2608.88	0.462871	0.142903	3.23905	0.00119926	0.039271
MGP_BALBcJ_G0031205__Mfap5	834.858	0.816568	0.252097	3.2391	0.0011991	0.039271
MGP_BALBcJ_G0033132__Pwwp2b	693.891	-0.502117	0.155171	-3.2359	0.00121259	0.0396255
MGP_BALBcJ_G0027434__Gatad2b	2026.42	-0.225578	0.0697572	-3.23376	0.00122174	0.0398423
MGP_BALBcJ_G0021174__Atg14	752.547	-0.367432	0.113654	-3.2329	0.00122539	0.0398793
MGP_BALBcJ_G0033573__Stox2	784.643	0.482374	0.149367	3.22946	0.00124022	0.0402678
MGP_BALBcJ_G0034963__Rora	1725.18	-0.426163	0.131981	-3.22896	0.00124241	0.0402678
MGP_BALBcJ_G0016032__Klf7	2279.66	-0.654922	0.203031	-3.22573	0.00125654	0.0405735
MGP_BALBcJ_G0020497__Spin1	2326.53	-0.381091	0.118145	-3.22563	0.00125696	0.0405735
MGP_BALBcJ_G0021032__Slmap	6732.49	-0.523215	0.162263	-3.22448	0.00126201	0.0406536
MGP_BALBcJ_G0034654__Oaf	196.185	0.975119	0.302544	3.22306	0.00126829	0.0407731
MGP_BALBcJ_G0028060__Tstd3	104.179	0.680262	0.211174	3.22133	0.00127598	0.0409373
MGP_BALBcJ_G0027789__Frrs1	2160.97	0.408388	0.126829	3.22	0.00128192	0.0410447
MGP_BALBcJ_G0022920__Robo1	105.156	0.858248	0.266742	3.21752	0.00129303	0.041317
MGP_BALBcJ_G0016551__Ier5	1692.02	-0.508621	0.15839	-3.21119	0.00132187	0.0419369
MGP_BALBcJ_G0023081__Synj2	1352.6	-0.388066	0.120822	-3.21187	0.00131872	0.0419369
MGP_BALBcJ_G0027850__Sec24b	1807.65	-0.338721	0.105434	-3.21263	0.00131527	0.0419369
MGP_BALBcJ_G0033439__Gpat4	5050.11	-0.590028	0.183756	-3.21094	0.00132301	0.0419369
MGP_BALBcJ_G0019118__Naglu	673.752	0.344076	0.107273	3.20748	0.00133903	0.0423597
MGP_BALBcJ_G0032214__Ftl1-ps1	27956.7	0.390773	0.12188	3.20621	0.00134497	0.042463
MGP_BALBcJ_G0023359__Rgs11	253.597	0.820244	0.255995	3.20415	0.00135464	0.0426833
MGP_BALBcJ_G0028958__C1qa	2477.95	0.701632	0.219057	3.20296	0.00136024	0.042721
MGP_BALBcJ_G0033949__Ccdc102a	97.6533	0.623941	0.194814	3.20275	0.00136123	0.042721
MGP_BALBcJ_G0020218__Zkscan3	2237.94	-0.327151	0.102184	-3.20157	0.0013668	0.0427265
MGP_BALBcJ_G0024516__Elac1	535.504	-0.464913	0.145195	-3.20199	0.00136481	0.0427265
MGP_BALBcJ_G0025231__Tcf7l2	1099.13	-0.503017	0.157145	-3.20097	0.00136964	0.0427311
MGP_BALBcJ_G0019504__Efr3b	119.374	0.995463	0.311045	3.20039	0.00137244	0.0427343
MGP_BALBcJ_G0020056__NA	43.3221	1.70414	0.532718	3.19895	0.0013793	0.0428639
MGP_BALBcJ_G0024246__Ankhd1	3460.01	-0.20557	0.06428	-3.19804	0.00138363	0.0429141
MGP_BALBcJ_G0029296__Lrrc17	121.903	1.65952	0.519126	3.19676	0.00138983	0.0430222
MGP_BALBcJ_G0018736__Nf1	1413.54	-0.366996	0.114905	-3.1939	0.00140366	0.0433657
MGP_BALBcJ_G0030293__Gna12	1582.88	0.355199	0.111262	3.19246	0.00141067	0.0434976
MGP_BALBcJ_G0029594__Slain2	1626.56	-0.254	0.079601	-3.19092	0.00141821	0.0436451
MGP_BALBcJ_G0022055__Cbx6	1568.12	0.592612	0.185933	3.18723	0.00143642	0.0441197
MGP_BALBcJ_G0017030__Stx7	1826.9	0.2797	0.0878011	3.18561	0.00144447	0.0442812
MGP_BALBcJ_G0019943__Flrt2	265.192	1.04943	0.329714	3.18285	0.00145834	0.0446202
MGP_BALBcJ_G0006840__Gm15408	13.7934	1.87249	0.588601	3.18126	0.00146634	0.0447266
MGP_BALBcJ_G0016634__Dcaf6	1898.02	-0.312183	0.0981559	-3.18049	0.00147029	0.0447266
MGP_BALBcJ_G0022279__Kmt2d	5050.54	-0.312151	0.0981332	-3.18089	0.00146824	0.0447266
MGP_BALBcJ_G0007478__Gm38150	13.72	-1.90621	0.599771	-3.17823	0.00148178	0.04499
MGP_BALBcJ_G0022774__Gsk3b	3386.79	0.332111	0.104563	3.17617	0.00149232	0.045079
MGP_BALBcJ_G0029089__Fv1	71.0789	-0.779459	0.245408	-3.17617	0.00149233	0.045079
MGP_BALBcJ_G0033319__Shcbp1	24.5328	1.82463	0.574508	3.17599	0.00149325	0.045079
MGP_BALBcJ_G0016600__Dnm3	408.951	-0.508569	0.160223	-3.17413	0.00150286	0.0452828
MGP_BALBcJ_G0022236__Slc38a2	5295.4	-0.561345	0.176955	-3.17224	0.00151267	0.0453701
MGP_BALBcJ_G0022951__Bach1	1541.51	-0.32997	0.104026	-3.17198	0.00151403	0.0453701
MGP_BALBcJ_G0027790__Palmd	406.121	0.500221	0.157703	3.17192	0.00151434	0.0453701
MGP_BALBcJ_G0024607__Gstp1	1304.82	0.408829	0.128917	3.17126	0.0015178	0.045388
MGP_BALBcJ_G0032585__Xndc1	170.631	-0.462898	0.146058	-3.16927	0.0015282	0.045613
MGP_BALBcJ_G0019212__Nsf	1078.41	0.278297	0.0878334	3.16846	0.00153247	0.0456543
MGP_BALBcJ_G0020797__Sv2c	59.9235	-1.33148	0.420531	-3.16618	0.00154454	0.0459276
MGP_BALBcJ_G0027635__Tbx15	113.208	0.722376	0.228219	3.16527	0.0015494	0.0459859
MGP_BALBcJ_G0030376__Mtus2	31.1183	1.91916	0.606555	3.16404	0.00155596	0.0460942
MGP_BALBcJ_G0019493__Zfp750	470.598	0.877181	0.277907	3.15638	0.00159742	0.047234
MGP_BALBcJ_G0016408__Mfsd4a	692.567	0.483812	0.153381	3.15432	0.00160871	0.0473301
MGP_BALBcJ_G0016649__Gm4847	15.3498	3.01752	0.956844	3.15362	0.00161261	0.0473301
MGP_BALBcJ_G0016655__Mgst3	911.964	-0.37566	0.119106	-3.154	0.00161051	0.0473301
MGP_BALBcJ_G0017568__Gnptab	2483.89	-0.668036	0.211763	-3.15463	0.001607	0.0473301
MGP_BALBcJ_G0016233__Col6a3	3516.43	1.1128	0.353062	3.15184	0.00162247	0.0475052
MGP_BALBcJ_G0026575__Ralgapa2	745.65	-0.46402	0.147243	-3.1514	0.0016249	0.0475052
MGP_BALBcJ_G0028187__Tpm2	2758.07	0.382596	0.121424	3.15092	0.00162757	0.0475052
MGP_BALBcJ_G0016627__Atp1b1	2169.79	0.793296	0.251992	3.1481	0.00164336	0.0477172
MGP_BALBcJ_G0026759__Nnat	126.268	1.15229	0.36598	3.14851	0.00164104	0.0477172
MGP_BALBcJ_G0030468__Ptprz1	56.7118	0.916099	0.291009	3.14801	0.00164386	0.0477172
MGP_BALBcJ_G0028390__Adamtsl1	239.805	0.707427	0.224957	3.14473	0.00166241	0.0481674
MGP_BALBcJ_G0020457__Mylip	2677.66	-0.401807	0.127817	-3.14361	0.00166879	0.0482639
MGP_BALBcJ_G0017301__Gstt3	657.539	-0.428966	0.136498	-3.14266	0.00167422	0.0483328
MGP_BALBcJ_G0026831__Pigt	1730.69	0.269417	0.0857683	3.14122	0.00168248	0.048483
MGP_BALBcJ_G0003474__E030013I19Rik	1438.6	-0.940701	0.300133	-3.13428	0.00172274	0.0495451
MGP_BALBcJ_G0020871__Zswim6	767.305	-0.480558	0.153347	-3.1338	0.00172559	0.0495451
MGP_BALBcJ_G0034482__Adamts15	900.75	0.506128	0.161699	3.13006	0.00174768	0.0500887
MGP_BALBcJ_G0036138__NA	19.6349	1.51893	0.485443	3.12895	0.00175429	0.0501874
MGP_BALBcJ_G0027101__Phc3	2688.94	-0.22421	0.0716688	-3.12842	0.00175751	0.0501888
MGP_BALBcJ_G0033817__Adgrl1	347.247	0.44332	0.141733	3.12786	0.00176084	0.0501936
MGP_BALBcJ_G0000372__NA	297.276	-0.603777	0.19315	-3.12595	0.00177232	0.0503397
MGP_BALBcJ_G0021666__Rictor	1659.71	-0.389815	0.124689	-3.1263	0.00177021	0.0503397
MGP_BALBcJ_G0024023__Sos1	1460.29	-0.297107	0.0951318	-3.12311	0.00178953	0.0507375
MGP_BALBcJ_G0030041__NA	1731.02	-0.415181	0.133043	-3.12066	0.00180449	0.0510247
MGP_BALBcJ_G0032501__Prcp	764.059	0.448206	0.143662	3.11987	0.00180932	0.0510247
MGP_BALBcJ_G0033337__Ing1	628.178	-0.308384	0.0988342	-3.12022	0.00180718	0.0510247
MGP_BALBcJ_G0021127__Bmpr1a	4088.49	-0.276687	0.0887105	-3.11898	0.00181476	0.0510871
MGP_BALBcJ_G0021116__A630023A22Rik	1809.32	-0.521103	0.167298	-3.11481	0.00184061	0.0517231
MGP_BALBcJ_G0031997__Syne4	1559.28	-0.560167	0.179921	-3.11341	0.00184942	0.0518786
MGP_BALBcJ_G0024960__Smc5	1330.82	-0.302919	0.0973473	-3.11174	0.00185989	0.0519002
MGP_BALBcJ_G0031694__Ap2s1	1505.63	0.269857	0.0867222	3.11174	0.00185988	0.0519002
MGP_BALBcJ_G0033442__Sfrp1	3265.36	-0.448828	0.144238	-3.11172	0.00186001	0.0519002
MGP_BALBcJ_G0020875__Elovl7	797.042	-0.335132	0.10773	-3.11086	0.00186545	0.0519606
MGP_BALBcJ_G0016864__Kcnk2	98.3363	-0.85354	0.27502	-3.10355	0.00191211	0.0526711
MGP_BALBcJ_G0017576__Ano4	275.717	1.01814	0.328106	3.10307	0.00191522	0.0526711
MGP_BALBcJ_G0019643__Arl4a	1070	-0.688878	0.22191	-3.10431	0.00190724	0.0526711
MGP_BALBcJ_G0021529__Lrch1	978.862	-0.426042	0.137271	-3.10366	0.00191141	0.0526711
MGP_BALBcJ_G0024636__Sptbn2	1143.03	-0.530166	0.170824	-3.10357	0.00191199	0.0526711
MGP_BALBcJ_G0024952__Zfand5	4324.81	-0.327181	0.105436	-3.10314	0.00191481	0.0526711
MGP_BALBcJ_G0030799__Fam13a	1986.46	-0.682443	0.21995	-3.10271	0.00191755	0.0526711
MGP_BALBcJ_G0032750__Tpp1	4389.63	0.279235	0.0899684	3.1037	0.00191117	0.0526711
MGP_BALBcJ_G0025856__Dnajc10	2393.84	0.280131	0.0903234	3.10142	0.00192595	0.0527358
MGP_BALBcJ_G0030325__Aimp2	372.1	-0.400774	0.129227	-3.10133	0.00192656	0.0527358
MGP_BALBcJ_G0032569__Arap1	3249.73	0.279511	0.0901445	3.1007	0.00193063	0.0527562
MGP_BALBcJ_G0015336__Gm20539	26.2926	-1.23317	0.397915	-3.09907	0.00194127	0.0529557
MGP_BALBcJ_G0016903__Cd34	1552.55	0.735715	0.237855	3.09313	0.00198058	0.053935
MGP_BALBcJ_G0025821__Hoxd9	118.972	0.785069	0.253975	3.09113	0.00199399	0.0542071
MGP_BALBcJ_G0026538__Jag1	1010.5	-0.482531	0.156352	-3.08618	0.00202746	0.0550227
MGP_BALBcJ_G0032068__Cebpg	2088.88	-0.314716	0.102019	-3.08486	0.00203645	0.0551722
MGP_BALBcJ_G0027886__Ddit4l	78.9442	0.776757	0.251861	3.08407	0.00204189	0.055225
MGP_BALBcJ_G0022657__Tprg	8.15029	2.99297	0.970989	3.08239	0.00205345	0.0554431
MGP_BALBcJ_G0016226__Sh3bp4	2260.36	-0.413063	0.13425	-3.07682	0.00209224	0.0557311
MGP_BALBcJ_G0019302__Btbd17	12.4946	1.88477	0.612146	3.07896	0.00207724	0.0557311
MGP_BALBcJ_G0019530__Sdc1	978.502	0.459637	0.149262	3.07941	0.00207411	0.0557311
MGP_BALBcJ_G0020179__Nid1	4159.52	0.645969	0.209838	3.07842	0.002081	0.0557311
MGP_BALBcJ_G0024466__Wdr7	1014.57	0.329072	0.106841	3.08002	0.00206986	0.0557311
MGP_BALBcJ_G0024932__Psat1	410.562	-0.608837	0.19783	-3.07758	0.00208689	0.0557311
MGP_BALBcJ_G0029965__Nos1	83.2858	1.58318	0.51448	3.07724	0.00208928	0.0557311
MGP_BALBcJ_G0035555__Kdm6a	2166.15	-0.310124	0.100793	-3.07683	0.00209212	0.0557311
MGP_BALBcJ_G0024760__Atl3	5661.63	-0.276634	0.0899718	-3.07467	0.00210733	0.0559448
MGP_BALBcJ_G0035227__Cyb561d2	236.659	0.46523	0.151287	3.07514	0.00210404	0.0559448
MGP_BALBcJ_G0019631__Tspan13	1142.08	0.776362	0.252721	3.07202	0.00212618	0.0563508
MGP_BALBcJ_G0021144__Tspan14	3856.87	-0.265152	0.0863544	-3.07051	0.00213691	0.056394
MGP_BALBcJ_G0025522__Sptan1	9202.68	-0.375455	0.122251	-3.07117	0.00213221	0.056394
MGP_BALBcJ_G0033620__Cpe	825.807	0.511765	0.166683	3.07029	0.00213848	0.056394
MGP_BALBcJ_G0015405__Gm14005	314.64	0.99303	0.323555	3.06912	0.0021469	0.0564348
MGP_BALBcJ_G0016483__Camsap2	2050.3	-0.302653	0.0986293	-3.06859	0.00215071	0.0564348
MGP_BALBcJ_G0033073__Fgfr2	766.422	-0.62929	0.205064	-3.06875	0.00214954	0.0564348
MGP_BALBcJ_G0017302__Gstt1	409.777	-0.697456	0.227581	-3.06465	0.00217925	0.0570803
MGP_BALBcJ_G0026154__Hsd17b12	5174.08	0.241766	0.0789	3.0642	0.00218251	0.0570803
MGP_BALBcJ_G0016899__Hsd11b1	311.558	-0.706044	0.23063	-3.06137	0.00220327	0.0573755
MGP_BALBcJ_G0018936__Snf8	1089.42	0.302134	0.0987571	3.05937	0.00221804	0.0573755
MGP_BALBcJ_G0022265__Kansl2	2082.13	-0.312012	0.101963	-3.06005	0.00221302	0.0573755
MGP_BALBcJ_G0027756__Gpsm2	357.018	0.732481	0.239284	3.06113	0.00220502	0.0573755
MGP_BALBcJ_G0031474__Arntl2	1457.55	-0.594082	0.194182	-3.05942	0.00221769	0.0573755
MGP_BALBcJ_G0032875__Sox6	110.767	-0.548934	0.17941	-3.05966	0.00221591	0.0573755
MGP_BALBcJ_G0033909__NA	677.842	-0.391068	0.127833	-3.05922	0.00221914	0.0573755
MGP_BALBcJ_G0022656__Lpp	5678.51	-0.183795	0.0601173	-3.05727	0.00223366	0.0576569
MGP_BALBcJ_G0027798__Tmem56	1083.69	-0.519577	0.17006	-3.05526	0.00224867	0.05795
MGP_BALBcJ_G0028772__Sfpq	4735.55	-0.343204	0.112412	-3.05311	0.00226486	0.0582725
MGP_BALBcJ_G0034872__Arih1	2987.56	-0.226982	0.0743676	-3.05216	0.00227204	0.0583624
MGP_BALBcJ_G0007232__4732496C06Rik	142.935	-0.892809	0.292757	-3.04966	0.00229101	0.0587544
MGP_BALBcJ_G0025244__Fam160b1	1364.52	-0.225835	0.0740979	-3.04779	0.00230529	0.0590252
MGP_BALBcJ_G0032039__Fam187b	155.139	-0.522709	0.171655	-3.04512	0.00232587	0.0594209
MGP_BALBcJ_G0034015__Fhod1	951.068	-0.412134	0.135356	-3.04481	0.00232825	0.0594209
MGP_BALBcJ_G0027788__Agl	992.286	0.292812	0.0962232	3.04306	0.00234189	0.059673
MGP_BALBcJ_G0017954__Ykt6	2613.94	0.23324	0.0766965	3.04108	0.00235733	0.05997
MGP_BALBcJ_G0023955__Epb41l3	109.041	0.851277	0.280155	3.03859	0.00237691	0.0603507
MGP_BALBcJ_G0027474__Sprr1a	10.7179	4.84435	1.59448	3.03821	0.00237991	0.0603507
MGP_BALBcJ_G0024148__Trappc8	1975.32	-0.198846	0.0654745	-3.037	0.00238942	0.0604952
MGP_BALBcJ_G0030514__Ahcyl2	3716.96	0.473464	0.156174	3.03164	0.00243228	0.061482
MGP_BALBcJ_G0016384__Fcamr	34.7888	1.07072	0.353376	3.02998	0.00244573	0.0615869
MGP_BALBcJ_G0016468__Nav1	1048.64	0.31662	0.104519	3.02932	0.00245103	0.0615869
MGP_BALBcJ_G0026151__NA	211.248	-1.62936	0.537883	-3.02921	0.00245197	0.0615869
MGP_BALBcJ_G0033518__D8Ertd82e	1335.9	0.541685	0.178775	3.02998	0.00244566	0.0615869
MGP_BALBcJ_G0033284__Arhgef18	2250.07	-0.289956	0.0957532	-3.02816	0.00246051	0.0617036
MGP_BALBcJ_G0026732__Rbm12	275.507	-0.377737	0.124774	-3.02738	0.00246686	0.061765
MGP_BALBcJ_G0021958__Mroh1	5465.24	0.336242	0.111098	3.02654	0.00247373	0.0618394
MGP_BALBcJ_G0016013__Nbeal1	1919.85	-0.359315	0.118782	-3.02499	0.00248643	0.061904
MGP_BALBcJ_G0033969__Slc38a7	1162.25	0.260537	0.0861338	3.02479	0.00248803	0.061904
MGP_BALBcJ_G0034660__Usp2	351.457	0.642347	0.212296	3.02571	0.00248047	0.061904
MGP_BALBcJ_G0002812__Gm16365	14.3025	1.61893	0.535827	3.02137	0.00251632	0.0625009
MGP_BALBcJ_G0021718__Fam134b	3207.17	-0.383137	0.126827	-3.02094	0.00251991	0.0625009
MGP_BALBcJ_G0016770__Fmn2	10.4494	2.27334	0.753032	3.01892	0.00253675	0.0627222
MGP_BALBcJ_G0028613__Prdx1	19034.1	0.263574	0.0873001	3.01917	0.00253465	0.0627222
MGP_BALBcJ_G0015931__Col5a2	5046.36	1.04278	0.345638	3.01696	0.00255325	0.0630265
MGP_BALBcJ_G0023793__Cnpy3	1005.71	0.280787	0.0930833	3.01651	0.00255701	0.0630265
MGP_BALBcJ_G0031526__Rdh13	456.607	-0.368402	0.122337	-3.01137	0.00260072	0.0640045
MGP_BALBcJ_G0034043__Lcat	11.5146	2.07655	0.689811	3.01031	0.00260981	0.0641286
MGP_BALBcJ_G0030409__Col1a2	16424.7	1.34847	0.448283	3.00809	0.00262899	0.0644997
MGP_BALBcJ_G0031900__Pld3	3555.55	0.26853	0.0892927	3.0073	0.00263581	0.0645672
MGP_BALBcJ_G0026451__Mertk	379.65	0.668183	0.222455	3.00367	0.00266745	0.065141
MGP_BALBcJ_G0026539__Btbd3	833.955	0.374844	0.124779	3.00407	0.00266391	0.065141
MGP_BALBcJ_G0022082__Ep300	2872.85	-0.287475	0.0957409	-3.00264	0.0026765	0.0652277
MGP_BALBcJ_G0022299__Aqp5	72.9249	1.46437	0.48782	3.00186	0.00268335	0.0652277
MGP_BALBcJ_G0022473__Tvp23a	18.2278	1.62277	0.540513	3.00227	0.00267971	0.0652277
MGP_BALBcJ_G0020082__Klc1	2046.55	-0.342901	0.114251	-3.0013	0.00268833	0.0652455
MGP_BALBcJ_G0030318__Daglb	488.717	0.370446	0.123467	3.00038	0.00269644	0.0652455
MGP_BALBcJ_G0032958__Gtf3c1	3025.99	0.249659	0.083208	3.00042	0.00269607	0.0652455
MGP_BALBcJ_G0016036__Fzd5	359.72	-0.601996	0.200733	-2.99899	0.0027088	0.0652458
MGP_BALBcJ_G0022358__Krt4	21.4891	2.27228	0.757602	2.9993	0.00270599	0.0652458
MGP_BALBcJ_G0029552__Klb	166.73	-0.975303	0.32516	-2.99945	0.00270467	0.0652458
MGP_BALBcJ_G0031733__Irf2bp1	508.831	-0.388583	0.129596	-2.99841	0.00271394	0.0652706
MGP_BALBcJ_G0015855__Hs6st1	4842.79	-0.512805	0.171178	-2.99574	0.00273779	0.0656448
MGP_BALBcJ_G0019420__Gaa	5160.93	0.330035	0.110158	2.99601	0.00273535	0.0656448
MGP_BALBcJ_G0015974__Plcl1	307.375	-0.497216	0.166054	-2.9943	0.00275078	0.0656593
MGP_BALBcJ_G0022677__Lrrc15	260.046	2.17756	0.727347	2.99383	0.00275497	0.0656593
MGP_BALBcJ_G0034136__Maf	674.361	0.824554	0.275387	2.99416	0.00275202	0.0656593
MGP_BALBcJ_G0035895__Heph	289.773	0.768982	0.256846	2.99395	0.00275393	0.0656593
MGP_BALBcJ_G0007133__Gm37494	1455.83	-0.444676	0.148584	-2.99276	0.00276467	0.0657364
MGP_BALBcJ_G0017368__Casp14	20.9881	1.70601	0.570172	2.9921	0.00277064	0.0657364
MGP_BALBcJ_G0018669__Fam57a	455.165	0.593662	0.198385	2.99247	0.00276734	0.0657364
MGP_BALBcJ_G0033704__Ifi30	4228.05	0.81414	0.272156	2.99145	0.00277657	0.0657787
MGP_BALBcJ_G0019196__Plcd3	373.546	-0.40107	0.134097	-2.99089	0.00278168	0.0658013
MGP_BALBcJ_G0034046__Dpep2	88.9753	0.986354	0.329962	2.9893	0.00279617	0.0660455
MGP_BALBcJ_G0027879__Manba	1163.25	0.438582	0.146816	2.9873	0.00281457	0.0663811
MGP_BALBcJ_G0033154__Cd163l1	8.42737	4.18082	1.3999	2.98652	0.00282175	0.0664515
MGP_BALBcJ_G0016753__Mndal	396.782	0.636942	0.213535	2.98284	0.00285583	0.0671543
MGP_BALBcJ_G0031863__Axl	2924.21	0.507572	0.170278	2.98085	0.00287452	0.0674937
MGP_BALBcJ_G0031392__Cdkn1b	1863.45	-0.447556	0.150172	-2.98029	0.00287975	0.0675166
MGP_BALBcJ_G0024159__Zfp397	1825.33	-0.312063	0.104856	-2.97611	0.00291927	0.0683419
MGP_BALBcJ_G0017766__Lrp1	7968.17	0.616237	0.207229	2.97369	0.00294238	0.0687716
MGP_BALBcJ_G0030256__Zfp68	898.456	-0.309307	0.104029	-2.97329	0.0029463	0.0687716
MGP_BALBcJ_G0018023__Zrsr1	454.945	-0.358853	0.120733	-2.9723	0.00295582	0.0688924
MGP_BALBcJ_G0029895__Cmklr1	591.333	0.43673	0.146973	2.9715	0.00296347	0.0689692
MGP_BALBcJ_G0031385__Bcl2l14	66.95	0.931431	0.313638	2.96977	0.00298026	0.0692582
MGP_BALBcJ_G0029411__Plb1	689.959	0.944715	0.31847	2.96641	0.00301296	0.0699156
MGP_BALBcJ_G0024599__Unc93b1	2030.2	0.361955	0.122067	2.9652	0.00302485	0.0700889
MGP_BALBcJ_G0017920__Gatsl3	73.9152	0.807209	0.272334	2.96404	0.00303627	0.0702262
MGP_BALBcJ_G0027025__Stmn2	26.7691	1.5036	0.50734	2.9637	0.00303964	0.0702262
MGP_BALBcJ_G0027990__Wls	3548.99	0.274167	0.0925381	2.96275	0.00304904	0.0702387
MGP_BALBcJ_G0035043__Col12a1	1825.61	1.45563	0.491289	2.96287	0.00304782	0.0702387
MGP_BALBcJ_G0036009__Dach2	8.34195	-2.05664	0.694358	-2.96193	0.00305717	0.0703237
MGP_BALBcJ_G0016016__Raph1	3259.11	-0.468715	0.158351	-2.95998	0.00307654	0.0705685
MGP_BALBcJ_G0029864__Fbrsl1	2196.91	-0.392332	0.132546	-2.95997	0.00307671	0.0705685
MGP_BALBcJ_G0017577__Gas2l3	178.688	0.821481	0.277699	2.95817	0.00309471	0.0708786
MGP_BALBcJ_G0029581__Gnpda2	402.622	-0.423027	0.143038	-2.95743	0.00310211	0.0709457
MGP_BALBcJ_G0026129__Mdk	290.171	1.24071	0.41962	2.95674	0.00310909	0.0710029
MGP_BALBcJ_G0030201__Trip6	886.31	-0.266044	0.0900235	-2.95527	0.00312392	0.071239
MGP_BALBcJ_G0018146__NA	806.364	-0.534657	0.180945	-2.9548	0.00312874	0.0712464
MGP_BALBcJ_G0032832__Akip1	452.477	-0.54435	0.184356	-2.95271	0.00314995	0.0716264
MGP_BALBcJ_G0021888__Slc45a4	761.983	0.376905	0.127688	2.95176	0.00315966	0.0716676
MGP_BALBcJ_G0027320__Fbxw7	1111.65	-0.392915	0.133128	-2.95141	0.00316331	0.0716676
MGP_BALBcJ_G0033960__Mmp15	2187.58	0.415786	0.140887	2.95121	0.00316533	0.0716676
MGP_BALBcJ_G0019551__Trib2	843.299	0.613188	0.207815	2.95064	0.00317115	0.0716969
MGP_BALBcJ_G0033612__Sh3rf1	267.9	-0.454706	0.154147	-2.94982	0.00317962	0.071786
MGP_BALBcJ_G0031107__Creld1	416.951	0.323312	0.109705	2.94712	0.00320753	0.072313
MGP_BALBcJ_G0026770__Adig	449.473	0.716238	0.243085	2.94645	0.00321442	0.0723656
MGP_BALBcJ_G0021258__Sall2	95.0869	0.634122	0.215288	2.94546	0.00322473	0.0723919
MGP_BALBcJ_G0024741__Plcb3	1945.06	-0.259894	0.0882302	-2.94564	0.00322288	0.0723919
MGP_BALBcJ_G0021825__Sntb1	433.094	-0.487225	0.165572	-2.94267	0.00325396	0.0729449
MGP_BALBcJ_G0032740__Smpd1	1057.12	0.320631	0.108991	2.94182	0.0032629	0.0730419
MGP_BALBcJ_G0026898__Adnp	29.7995	-1.1519	0.39171	-2.94069	0.00327484	0.0732059
MGP_BALBcJ_G0016465__Lmod1	863.488	0.737679	0.25093	2.93979	0.0032844	0.073213
MGP_BALBcJ_G0032931__Usp31	876.861	-0.407728	0.138688	-2.93989	0.00328324	0.073213
MGP_BALBcJ_G0017977__Pkd1l1	9.29044	2.13526	0.726525	2.93901	0.00329265	0.0732938
MGP_BALBcJ_G0020123__Rapgef5	2670.44	-0.638793	0.217456	-2.93758	0.00330786	0.0734419
MGP_BALBcJ_G0026175__Abtb2	335.283	-0.840932	0.286273	-2.93751	0.00330857	0.0734419
MGP_BALBcJ_G0023743__Enpp5	4553.37	0.358277	0.12204	2.93573	0.0033276	0.0736933
MGP_BALBcJ_G0025376__Il1f9	351.558	-1.37826	0.469625	-2.93482	0.0033374	0.0736933
MGP_BALBcJ_G0032371__Det1	224.31	-0.490579	0.167164	-2.93472	0.00333849	0.0736933
MGP_BALBcJ_G0034023__Atp6v0d1	3830.44	0.299953	0.102208	2.93472	0.00333844	0.0736933
MGP_BALBcJ_G0034434__Rab3d	2037.33	-0.358903	0.122354	-2.93331	0.00335364	0.0739248
MGP_BALBcJ_G0019087__Krt14	3136.83	0.870634	0.296965	2.93177	0.00337038	0.0741904
MGP_BALBcJ_G0033767__Large	1947.41	0.527489	0.180219	2.92694	0.00342312	0.0752469
MGP_BALBcJ_G0027174__Foxo1	1661.62	-0.435027	0.148844	-2.92271	0.00347004	0.0761254
MGP_BALBcJ_G0029015__Padi2	46.9415	0.830874	0.284305	2.92247	0.00347269	0.0761254
MGP_BALBcJ_G0015800__Crispld1	52.2906	1.0241	0.350499	2.92183	0.00347986	0.0761772
MGP_BALBcJ_G0018673__Nxn	837.798	0.367545	0.125829	2.921	0.0034891	0.0762742
MGP_BALBcJ_G0023027__Rcan1	1265.22	0.48884	0.167607	2.91659	0.00353883	0.077057
MGP_BALBcJ_G0023740__Slc25a27	271.472	-0.745246	0.255562	-2.9161	0.00354436	0.077057
MGP_BALBcJ_G0030357__NA	699.925	-0.30095	0.103191	-2.91643	0.00354067	0.077057
MGP_BALBcJ_G0036218__Vegfd	127.92	0.682233	0.233936	2.91632	0.00354188	0.077057
MGP_BALBcJ_G0034044__Slc12a4	450.72	0.465795	0.160051	2.91029	0.00361097	0.0783977
MGP_BALBcJ_G0034079__Dhx38	1788.89	0.25389	0.0872611	2.90955	0.00361953	0.0784759
MGP_BALBcJ_G0034935__Plekho2	3267.19	-0.500521	0.172054	-2.90909	0.00362478	0.0784825
MGP_BALBcJ_G0024680__1700020D05Rik	11.0842	1.80386	0.620511	2.90705	0.00364859	0.0788902
MGP_BALBcJ_G0029732__Shroom3	3131.29	-0.366272	0.126181	-2.90275	0.00369904	0.0798721
MGP_BALBcJ_G0007322__Gm26664	13.8698	-1.48377	0.511336	-2.90176	0.00371075	0.0800158
MGP_BALBcJ_G0027758__Stxbp3	1061.87	-0.2601	0.0896729	-2.90054	0.00372521	0.0801097
MGP_BALBcJ_G0031105__Il17re	996.902	-0.408743	0.140905	-2.90084	0.00372163	0.0801097
MGP_BALBcJ_G0028384__Snapc3	1008.26	-0.403335	0.139088	-2.89986	0.00373325	0.0801737
MGP_BALBcJ_G0020605__Ctla2a	678.04	0.308809	0.10651	2.89934	0.00373944	0.080198
MGP_BALBcJ_G0004835__C530043A13Rik	997.806	-0.982828	0.339417	-2.89564	0.00378389	0.0810417
MGP_BALBcJ_G0017053__Rnf146	1033.45	-0.227679	0.0786952	-2.89317	0.0038137	0.0813966
MGP_BALBcJ_G0018837__Gdpd1	226.354	0.906688	0.313375	2.8933	0.00381215	0.0813966
MGP_BALBcJ_G0022815__Atg3	1216.46	0.263001	0.0909357	2.89217	0.00382595	0.0813966
MGP_BALBcJ_G0031449__Kcnj8	201.735	0.528254	0.182631	2.89246	0.00382236	0.0813966
MGP_BALBcJ_G0035805__Atp6ap1	7577.09	0.309704	0.107084	2.89215	0.00382614	0.0813966
MGP_BALBcJ_G0018090__Kcnmb1	96.851	0.86394	0.2989	2.8904	0.0038475	0.081414
MGP_BALBcJ_G0019382__Mxra7	165.617	0.593431	0.205234	2.89148	0.00383434	0.081414
MGP_BALBcJ_G0024009__Cdc42ep3	447.263	-0.547708	0.189467	-2.89078	0.00384285	0.081414
MGP_BALBcJ_G0030581__Dennd2a	167.946	0.519791	0.179785	2.89118	0.00383793	0.081414
MGP_BALBcJ_G0034395__Col5a3	1389.95	0.912896	0.315939	2.88947	0.00385896	0.0815476
MGP_BALBcJ_G0024098__Wac	1783.64	-0.301927	0.104567	-2.88739	0.00388455	0.0818949
MGP_BALBcJ_G0033100__Fam175b	892.774	-0.247515	0.0857257	-2.88729	0.00388573	0.0818949
MGP_BALBcJ_G0025678__Olfml2a	160.339	0.794551	0.275608	2.8829	0.00394034	0.0829356
MGP_BALBcJ_G0016033__Creb1	1726.09	-0.269463	0.0934949	-2.88211	0.00395016	0.083032
MGP_BALBcJ_G0018976__Mllt6	2603.45	-0.412762	0.143275	-2.8809	0.0039654	0.0832078
MGP_BALBcJ_G0033032__Bcl7c	410.933	-0.323041	0.112143	-2.88061	0.00396902	0.0832078
MGP_BALBcJ_G0018882__Tom1l1	1145	-0.266133	0.0924184	-2.87966	0.0039811	0.0833507
MGP_BALBcJ_G0023323__Lmf1	1142.42	0.259018	0.0899896	2.87831	0.00399812	0.0835966
MGP_BALBcJ_G0015318__Snhg1	452.67	-0.497614	0.173017	-2.8761	0.00402617	0.0840721
MGP_BALBcJ_G0023016__Son	11364.6	-0.18459	0.0642401	-2.87344	0.00406027	0.0846726
MGP_BALBcJ_G0018011__Peli1	988.197	-0.301021	0.104797	-2.87242	0.0040734	0.0847235
MGP_BALBcJ_G0027546__Mllt11	198.541	-0.435246	0.151518	-2.87257	0.00407153	0.0847235
MGP_BALBcJ_G0005016__A430110L20Rik	112.631	-0.73841	0.257181	-2.87117	0.00408952	0.0848672
MGP_BALBcJ_G0021991__NA	14.5403	2.73163	0.951438	2.87106	0.00409102	0.0848672
MGP_BALBcJ_G0024514__Mex3c	1218.39	-0.346281	0.120754	-2.86766	0.00413525	0.0856727
MGP_BALBcJ_G0033517__Cldn23	50.4382	-0.796571	0.277865	-2.86675	0.00414711	0.0857021
MGP_BALBcJ_G0034188__Zcchc14	1454.16	-0.442313	0.154292	-2.86672	0.00414749	0.0857021
MGP_BALBcJ_G0022041__Csnk1e	2054.32	-0.332043	0.115928	-2.86421	0.00418045	0.0862707
MGP_BALBcJ_G0019495__Metrnl	295.902	0.64769	0.226182	2.86358	0.00418887	0.086332
MGP_BALBcJ_G0022127__Arfgap3	4009.43	-0.557187	0.194664	-2.8623	0.00420584	0.0865694
MGP_BALBcJ_G0027145__Spry1	203.239	0.397029	0.138812	2.86019	0.00423387	0.0870332
MGP_BALBcJ_G0024326__Pcdh1	2144.1	-0.387773	0.135699	-2.85761	0.00426845	0.087314
MGP_BALBcJ_G0030506__Flnc	399.961	0.908518	0.317867	2.85817	0.00426096	0.087314
MGP_BALBcJ_G0033920__Ces1f	256.986	-1.10668	0.387267	-2.85767	0.0042677	0.087314
MGP_BALBcJ_G0035372__Gpd1l	2223.66	-0.422902	0.147996	-2.85753	0.00426957	0.087314
MGP_BALBcJ_G0028612__Akr1a1	10017.5	0.190178	0.0665855	2.85615	0.00428808	0.0875796
MGP_BALBcJ_G0016466__Shisa4	179.454	0.66363	0.232455	2.85487	0.00430545	0.0877083
MGP_BALBcJ_G0028719__Heyl	97.949	0.705314	0.247026	2.85523	0.0043006	0.0877083
MGP_BALBcJ_G0000060__Ighv14-4	118.327	-1.80225	0.631447	-2.85417	0.004315	0.0877298
MGP_BALBcJ_G0004452__Gm15635	47.1517	-1.35134	0.473494	-2.85398	0.00431758	0.0877298
MGP_BALBcJ_G0018523__NA	332.822	0.981816	0.344119	2.85313	0.00432904	0.0878501
MGP_BALBcJ_G0025802__Cdca7	537.221	-0.682051	0.239117	-2.85238	0.00433935	0.0879468
MGP_BALBcJ_G0016835__Susd4	107.949	0.920131	0.322721	2.85117	0.0043559	0.0881694
MGP_BALBcJ_G0004397__Tmem147os	223.964	-0.471462	0.165453	-2.84952	0.00437858	0.0884027
MGP_BALBcJ_G0035641__Gria3	96.4292	0.888494	0.311793	2.84963	0.00437699	0.0884027
MGP_BALBcJ_G0028840__Mecr	661.443	0.303561	0.106546	2.8491	0.00438424	0.0884044
MGP_BALBcJ_G0016308__Tnfrsf11a	3548.76	-0.530637	0.186362	-2.84735	0.00440843	0.08867
MGP_BALBcJ_G0028888__NA	785.113	0.337427	0.118506	2.84734	0.0044086	0.08867
MGP_BALBcJ_G0006558__5031425E22Rik	408.787	-0.490315	0.172436	-2.84347	0.00446258	0.0895452
MGP_BALBcJ_G0032956__Il4ra	4811.5	0.558957	0.19658	2.84341	0.00446342	0.0895452
MGP_BALBcJ_G0022371__Rarg	1357.4	-0.283432	0.0997978	-2.84006	0.00451052	0.0903758
MGP_BALBcJ_G0024809__Myrf	194.319	-1.2305	0.433697	-2.83725	0.00455046	0.0910609
MGP_BALBcJ_G0018531__Alox12e	62.7477	4.32012	1.52442	2.83395	0.00459771	0.0918905
MGP_BALBcJ_G0020553__Fam193b	2526.14	-0.242564	0.0856367	-2.83247	0.00461897	0.0921992
MGP_BALBcJ_G0031079__Sumf1	1624.83	0.326761	0.115442	2.83053	0.00464707	0.0926433
MGP_BALBcJ_G0018318__Gm12258	265.208	-0.425355	0.150317	-2.82971	0.00465899	0.0927642
MGP_BALBcJ_G0017253__Sirt1	911.59	-0.257634	0.0910774	-2.82874	0.00467318	0.0929301
MGP_BALBcJ_G0027102__Prkci	2354.29	-0.314598	0.111252	-2.8278	0.00468697	0.0930875
MGP_BALBcJ_G0018812__Dhrs11	400.977	0.35407	0.125239	2.82717	0.00469619	0.0931539
MGP_BALBcJ_G0019130__Ramp2	231.578	0.478002	0.169145	2.82599	0.00471341	0.0933786
MGP_BALBcJ_G0031472__Med21	528.851	-0.340693	0.120613	-2.82468	0.00473274	0.0936444
MGP_BALBcJ_G0020366__Irf4	238.827	0.671698	0.237893	2.82353	0.00474977	0.0938642
MGP_BALBcJ_G0019815__Pigh	299.454	0.413982	0.146674	2.82246	0.00476563	0.0940604
MGP_BALBcJ_G0028836__Sdc3	1468.19	0.59111	0.209578	2.82047	0.00479529	0.094528
MGP_BALBcJ_G0019983__Btbd7	1084.93	-0.308177	0.109284	-2.81996	0.00480289	0.0945603
MGP_BALBcJ_G0034925__NA	1933.9	1.92934	0.684417	2.81896	0.00481798	0.0947397
MGP_BALBcJ_G0005373__Meg3	633.832	0.926041	0.32887	2.81583	0.0048652	0.0951336
MGP_BALBcJ_G0019509__Ncoa1	1814.16	-0.4573	0.162431	-2.81535	0.00487241	0.0951336
MGP_BALBcJ_G0022724__Heg1	3813.27	-0.293435	0.104188	-2.81641	0.00485637	0.0951336
MGP_BALBcJ_G0023379__Uqcc2	441.873	0.383608	0.136261	2.81524	0.00487403	0.0951336
MGP_BALBcJ_G0029973__Tbx3	179.214	0.717351	0.254675	2.81673	0.00485149	0.0951336
MGP_BALBcJ_G0032257__Tph1	168.527	1.20522	0.427949	2.81627	0.00485852	0.0951336
MGP_BALBcJ_G0017384__Plpp2	2107.94	-0.322708	0.114686	-2.81383	0.00489547	0.0952126
MGP_BALBcJ_G0021523__Med4	450.416	-0.406947	0.144616	-2.81398	0.00489325	0.0952126
MGP_BALBcJ_G0026715__Edem2	2643.47	0.28161	0.100082	2.81379	0.0048961	0.0952126
MGP_BALBcJ_G0028021__Esrp1	4109.3	-0.438108	0.155759	-2.81272	0.00491238	0.0954122
MGP_BALBcJ_G0030045__Bcl7a	993.696	-0.340823	0.121235	-2.81126	0.00493475	0.0957294
MGP_BALBcJ_G0006969__NA	8.90059	2.37745	0.846122	2.80982	0.00495691	0.0958383
MGP_BALBcJ_G0022332__Acvr1b	2825.78	-0.494312	0.175898	-2.81022	0.00495081	0.0958383
MGP_BALBcJ_G0032148__Clec11a	55.2642	0.895149	0.31859	2.80972	0.00495851	0.0958383
MGP_BALBcJ_G0019736__Sos2	1404.14	-0.266226	0.0947989	-2.80832	0.00498005	0.0961374
MGP_BALBcJ_G0028085__Rragd	688.382	0.678689	0.241978	2.80476	0.00503544	0.0970884
MGP_BALBcJ_G0026329__Mapkbp1	2122.92	-0.280409	0.100005	-2.80395	0.0050481	0.0972143
MGP_BALBcJ_G0024107__Rock1	2043.67	-0.25235	0.0900454	-2.80248	0.00507114	0.0975395
MGP_BALBcJ_G0006562__4831440E17Rik	20.4806	-1.2691	0.453308	-2.79964	0.00511595	0.0981463
MGP_BALBcJ_G0018650__Serpinf1	1395.53	0.628533	0.224532	2.79931	0.00512127	0.0981463
MGP_BALBcJ_G0026541__Ism1	89.6183	0.677956	0.242166	2.79955	0.00511743	0.0981463
MGP_BALBcJ_G0029504__Fgfbp1	8.16192	3.76655	1.34643	2.79743	0.00515102	0.0985973
MGP_BALBcJ_G0017609__Cradd	110.766	0.602959	0.215613	2.79649	0.00516614	0.0987607
MGP_BALBcJ_G0022089__Tob2	1587.85	-0.392167	0.140273	-2.79573	0.00517825	0.0987607
MGP_BALBcJ_G0027818__Synpo2	592.647	0.663689	0.237369	2.79602	0.00517357	0.0987607
MGP_BALBcJ_G0019952__Foxn3	750.996	-0.312885	0.111986	-2.79395	0.00520681	0.0990666
MGP_BALBcJ_G0025434__Fcna	202.536	0.801824	0.287025	2.79357	0.00521305	0.0990666
MGP_BALBcJ_G0028721__Bmp8a	10.152	2.66511	0.953875	2.79398	0.00520638	0.0990666
MGP_BALBcJ_G0016479__Kif21b	756.509	-0.815965	0.292318	-2.79136	0.00524873	0.0993003
MGP_BALBcJ_G0017812__Erbb3	7392.54	-0.680451	0.243813	-2.79087	0.00525667	0.0993003
MGP_BALBcJ_G0022806__Boc	745.437	-0.33609	0.120422	-2.79093	0.00525566	0.0993003
MGP_BALBcJ_G0025667__Zbtb26	300.252	-0.361468	0.129453	-2.79228	0.00523378	0.0993003
MGP_BALBcJ_G0030127__Wbscr17	34.1103	1.147	0.410814	2.79202	0.00523803	0.0993003
MGP_BALBcJ_G0019243__Smarcd2	2334.76	-0.49093	0.175965	-2.78993	0.00527194	0.0993518
MGP_BALBcJ_G0022013__C1qtnf6	299.492	1.0476	0.375466	2.79013	0.00526868	0.0993518
MGP_BALBcJ_G0035200__Dusp7	2012.34	-0.372211	0.133584	-2.78634	0.00533074	0.100341
MGP_BALBcJ_G0029489__Slc2a9	585.502	-0.629557	0.225979	-2.78591	0.00533775	0.100354
MGP_BALBcJ_G0005614__1300002E11Rik	604.564	-0.280995	0.100916	-2.78444	0.00536203	0.100452
MGP_BALBcJ_G0030115__Gusb	2251.76	0.462662	0.166148	2.78464	0.00535873	0.100452
MGP_BALBcJ_G0031500__Cacng7	76.3441	0.691436	0.248253	2.7852	0.00534945	0.100452
MGP_BALBcJ_G0018770__Lig3	2888.18	0.214581	0.0770954	2.78332	0.00538056	0.100681
MGP_BALBcJ_G0028560__Bend5	105.985	-0.739345	0.265694	-2.7827	0.00539088	0.100755
MGP_BALBcJ_G0025589__Ak1	115.763	0.859303	0.30896	2.78127	0.00541459	0.101079
MGP_BALBcJ_G0033430__NA	1399.45	-0.176935	0.0636475	-2.77992	0.00543722	0.101382
MGP_BALBcJ_G0016671__Nos1ap	344.885	-0.496519	0.178671	-2.77896	0.00545329	0.101562
MGP_BALBcJ_G0016889__Rcor3	683.673	-0.384109	0.138292	-2.77751	0.00547768	0.101896
MGP_BALBcJ_G0017978__Hus1	411.534	-0.329342	0.11864	-2.77599	0.00550342	0.102016
MGP_BALBcJ_G0031782__Pvr	807.804	-0.526519	0.189635	-2.77649	0.00549489	0.102016
MGP_BALBcJ_G0034785__Npat	669.261	-0.228803	0.0824131	-2.77629	0.00549827	0.102016
MGP_BALBcJ_G0021493__Egr3	136.1	1.33313	0.480449	2.77476	0.00552425	0.102282
MGP_BALBcJ_G0019469__Cbr2	1777.2	0.505296	0.182214	2.7731	0.00555259	0.102687
MGP_BALBcJ_G0030019__Ppp1cc	4962.43	-0.232722	0.0839335	-2.7727	0.00555933	0.102692
MGP_BALBcJ_G0030075__Tmed2	5076.7	0.178912	0.0645382	2.77218	0.00556817	0.102736
MGP_BALBcJ_G0028930__Ifnlr1	811.163	-0.544144	0.196346	-2.77136	0.00558231	0.102877
MGP_BALBcJ_G0025542__Crat	2003.36	-0.314961	0.113677	-2.77066	0.00559433	0.102979
MGP_BALBcJ_G0021675__Slc1a3	431.021	-0.798386	0.288356	-2.76875	0.0056271	0.103462
MGP_BALBcJ_G0000298__NA	76.677	-1.55592	0.56219	-2.7676	0.00564701	0.103707
MGP_BALBcJ_G0027941__Ssx2ip	952.599	-0.322869	0.1168	-2.76428	0.00570479	0.104647
MGP_BALBcJ_G0028387__Bnc2	33.2399	1.23939	0.448521	2.76328	0.00572244	0.10472
MGP_BALBcJ_G0031493__Amn1	720.96	-0.422203	0.152793	-2.76324	0.00572302	0.10472
MGP_BALBcJ_G0034856__Ccdc33	8.69785	3.1533	1.14129	2.76293	0.00572856	0.10472
MGP_BALBcJ_G0035403__Ttc21a	10.6046	2.02838	0.734301	2.76233	0.005739	0.10479
MGP_BALBcJ_G0023821__Foxp4	1595.43	-0.412592	0.14941	-2.76147	0.00575425	0.104947
MGP_BALBcJ_G0020746__Rasa1	1977.6	-0.252884	0.0916165	-2.76025	0.00577576	0.105218
MGP_BALBcJ_G0034846__Lman1l	19.0353	1.78971	0.649104	2.7572	0.00582987	0.106082
MGP_BALBcJ_G0021306__Dhrs4	546.161	-0.276373	0.100253	-2.75677	0.00583763	0.106102
MGP_BALBcJ_G0026187__Hipk3	4251.16	-0.28209	0.10235	-2.75613	0.00584903	0.106187
MGP_BALBcJ_G0022437__Nmral1	125.966	0.58217	0.211275	2.75551	0.00586006	0.106265
MGP_BALBcJ_G0018958__Pnpo	1157.39	0.25255	0.091717	2.75358	0.00589481	0.106774
MGP_BALBcJ_G0017602__Fgd6	1367.4	-0.272294	0.0989348	-2.75226	0.00591858	0.107082
MGP_BALBcJ_G0007342__Crnde	138.459	-0.686548	0.249691	-2.74959	0.00596692	0.107588
MGP_BALBcJ_G0016800__Ahctf1	2089.91	-0.326225	0.118632	-2.74989	0.00596159	0.107588
MGP_BALBcJ_G0026850__Acot8	422.536	0.306192	0.111331	2.75028	0.00595452	0.107588
MGP_BALBcJ_G0035708__Mmgt1	1648.11	-0.228493	0.0831312	-2.74858	0.00598538	0.107798
MGP_BALBcJ_G0019849__Dpf3	27.9979	1.18435	0.430986	2.748	0.00599592	0.107865
MGP_BALBcJ_G0025629__Ggta1	2828.27	0.436904	0.159013	2.74761	0.00600321	0.107874
MGP_BALBcJ_G0024679__Snx32	144.998	0.702503	0.255776	2.74656	0.00602246	0.108097
MGP_BALBcJ_G0019935__Adck1	428.496	0.309971	0.112913	2.74521	0.0060472	0.108419
MGP_BALBcJ_G0024427__Smim3	566.698	0.322282	0.117437	2.7443	0.00606399	0.108467
MGP_BALBcJ_G0028867__Ahdc1	1166.03	-0.453791	0.165378	-2.74395	0.0060704	0.108467
MGP_BALBcJ_G0031183__Kdm5a	2474.8	-0.299191	0.109009	-2.74464	0.00605769	0.108467
MGP_BALBcJ_G0022507__Marf1	2842.57	-0.190708	0.0695217	-2.74314	0.0060855	0.108614
MGP_BALBcJ_G0033505__Rbpms	1648.76	0.278472	0.101535	2.74263	0.0060949	0.108659
MGP_BALBcJ_G0017689__Best3	10.1453	2.02455	0.738606	2.74104	0.00612457	0.108741
MGP_BALBcJ_G0023451__Pde9a	755.488	0.546403	0.199317	2.74137	0.00611838	0.108741
MGP_BALBcJ_G0024411__37681	244.967	-0.799868	0.291865	-2.74054	0.00613379	0.108741
MGP_BALBcJ_G0030759__Pde1c	6.915	2.32189	0.847065	2.7411	0.00612341	0.108741
MGP_BALBcJ_G0035358__Fbxl2	32.3375	0.980946	0.357915	2.74072	0.00613047	0.108741
MGP_BALBcJ_G0000095__Igkv1-135	585.081	1.08098	0.394578	2.7396	0.00615143	0.108932
MGP_BALBcJ_G0033796__Gab1	1679.61	-0.308113	0.112489	-2.73905	0.00616167	0.108991
MGP_BALBcJ_G0025487__Brd3	2210.35	-0.312627	0.114197	-2.73762	0.00618861	0.109346
MGP_BALBcJ_G0025803__Sp3	2230.81	-0.260836	0.0953248	-2.73628	0.00621375	0.109668
MGP_BALBcJ_G0016633__Gpr161	135.604	0.601935	0.220077	2.73512	0.0062358	0.109812
MGP_BALBcJ_G0018699__Phf12	1685.49	-0.268985	0.0983335	-2.73544	0.00622974	0.109812
MGP_BALBcJ_G0031687__Sae1	1218.49	0.284395	0.104009	2.73434	0.00625053	0.10995
MGP_BALBcJ_G0015843__Bend6	25.701	1.03655	0.379264	2.73306	0.00627486	0.110063
MGP_BALBcJ_G0028886__Arid1a	3964.65	-0.317303	0.116102	-2.73296	0.00627686	0.110063
MGP_BALBcJ_G0030000__Gm15800	1395.61	-0.247209	0.0904564	-2.73291	0.0062778	0.110063
MGP_BALBcJ_G0034020__Tppp3	327.557	0.596424	0.218284	2.73233	0.00628877	0.110133
MGP_BALBcJ_G0016826__Enah	550.571	0.57048	0.208916	2.73066	0.00632072	0.110327
MGP_BALBcJ_G0020942__Fam107a	41.9592	1.74232	0.638008	2.73087	0.00631678	0.110327
MGP_BALBcJ_G0033228__Dusp8	344.539	-1.01315	0.370944	-2.73129	0.00630879	0.110327
MGP_BALBcJ_G0022223__Adamts20	26.2898	1.0227	0.37458	2.73026	0.00632849	0.110341
MGP_BALBcJ_G0019834__Smoc1	227.363	-0.948236	0.347603	-2.72793	0.00637326	0.110957
MGP_BALBcJ_G0030174__Dtx2	352.231	-0.360555	0.132183	-2.7277	0.00637781	0.110957
MGP_BALBcJ_G0016776__Chml	291.917	-0.457809	0.167869	-2.72717	0.00638795	0.111012
MGP_BALBcJ_G0017051__9330159F19Rik	43.5803	-1.95012	0.715221	-2.72659	0.00639921	0.111086
MGP_BALBcJ_G0030295__Sdk1	213.931	0.568059	0.208415	2.72562	0.00641817	0.111293
MGP_BALBcJ_G0035718__Rbmx	2133.41	-0.478415	0.175718	-2.72263	0.00647655	0.112182
MGP_BALBcJ_G0018644__Hic1	109.937	0.820845	0.301601	2.72162	0.00649619	0.112292
MGP_BALBcJ_G0028804__Zbtb8b	49.1666	1.04178	0.382785	2.72158	0.00649704	0.112292
MGP_BALBcJ_G0034805__Hykk	87.0768	0.732226	0.269132	2.7207	0.0065144	0.112469
MGP_BALBcJ_G0026136__1700029I15Rik	28.4673	-0.947467	0.348294	-2.72031	0.0065221	0.11248
MGP_BALBcJ_G0017528__D10Wsu102e	1116.42	0.381062	0.140123	2.71949	0.00653829	0.112514
MGP_BALBcJ_G0035326__Setd2	2543.01	-0.2527	0.0929161	-2.71966	0.00653495	0.112514
MGP_BALBcJ_G0017280__Ube2d1	690.625	-0.332795	0.122407	-2.71877	0.00655254	0.112515
MGP_BALBcJ_G0020464__Fam8a1	2627.26	-0.345247	0.126972	-2.71908	0.00654629	0.112515
MGP_BALBcJ_G0028609__Gpbp1l1	2505.85	-0.258819	0.0952543	-2.71714	0.00658495	0.112949
MGP_BALBcJ_G0035927__Gjb1	119.016	-0.988221	0.36392	-2.71549	0.00661781	0.11339
MGP_BALBcJ_G0020439__Nedd9	2578.84	-0.856893	0.315716	-2.71413	0.00664507	0.113734
MGP_BALBcJ_G0029981__Tpcn1	2578.99	0.493586	0.181887	2.71369	0.00665375	0.11376
MGP_BALBcJ_G0015826__Col9a1	2343.23	-1.45495	0.536471	-2.71208	0.00668629	0.113775
MGP_BALBcJ_G0018867__Scpep1	1703.61	0.627351	0.231283	2.71249	0.00667804	0.113775
MGP_BALBcJ_G0020908__Itga2	112.881	1.38899	0.512169	2.71197	0.00668837	0.113775
MGP_BALBcJ_G0023565__Slc44a4	104.602	0.957768	0.353144	2.71212	0.00668542	0.113775
MGP_BALBcJ_G0036210__Ap1s2	370.445	0.653774	0.241079	2.71187	0.00669056	0.113775
MGP_BALBcJ_G0003824__Gm43573	7.43405	1.87321	0.690941	2.71111	0.00670592	0.113792
MGP_BALBcJ_G0032392__Zfp710	1333.35	-0.497457	0.183481	-2.71121	0.00670374	0.113792
MGP_BALBcJ_G0020394__Nqo2	322.886	0.312259	0.115201	2.71057	0.00671679	0.113855
MGP_BALBcJ_G0028835__Pum1	3139.24	-0.292188	0.107813	-2.71014	0.00672555	0.113882
MGP_BALBcJ_G0017173__Gja1	1553.83	0.782764	0.288927	2.70921	0.00674433	0.113956
MGP_BALBcJ_G0025003__9930021J03Rik	998.219	-0.225958	0.083401	-2.7093	0.0067426	0.113956
MGP_BALBcJ_G0023820__Mdfi	691.911	0.339801	0.1255	2.70757	0.00677771	0.114398
MGP_BALBcJ_G0016963__Adgrg6	200.228	0.50713	0.187514	2.70449	0.00684098	0.114459
MGP_BALBcJ_G0018686__Coro6	77.736	-1.00797	0.372692	-2.70458	0.00683915	0.114459
MGP_BALBcJ_G0024441__Csf1r	2655.37	0.724004	0.26773	2.70423	0.00684629	0.114459
MGP_BALBcJ_G0024655__Cd248	460.186	0.914507	0.33789	2.70652	0.00679921	0.114459
MGP_BALBcJ_G0027962__Usp33	1785.99	-0.192218	0.0710572	-2.70511	0.00682809	0.114459
MGP_BALBcJ_G0030889__Loxl3	247.498	0.690016	0.255042	2.7055	0.00682015	0.114459
MGP_BALBcJ_G0032550__Pgm2l1	731.494	-0.34537	0.127593	-2.70681	0.00679328	0.114459
MGP_BALBcJ_G0035516__Tbc1d25	601.366	-0.421948	0.15592	-2.70618	0.00680622	0.114459
MGP_BALBcJ_G0036234__Tlr8	175.478	1.04533	0.386314	2.70592	0.00681152	0.114459
MGP_BALBcJ_G0035194__Wdr82	1817.18	-0.181667	0.0672355	-2.70196	0.00689331	0.115123
MGP_BALBcJ_G0016307__2310035C23Rik	1531.67	-0.279383	0.103513	-2.69901	0.00695469	0.116026
MGP_BALBcJ_G0021072__Stab1	2776.63	0.766411	0.284073	2.69793	0.00697712	0.116236
MGP_BALBcJ_G0032351__Ttc23	337.337	0.419765	0.155601	2.6977	0.00698195	0.116236
MGP_BALBcJ_G0022496__Mkl2	2884.7	-0.533333	0.197778	-2.69663	0.00700459	0.116491
MGP_BALBcJ_G0027408__Zbtb7b	2502.75	-0.296279	0.109915	-2.69552	0.00702788	0.116575
MGP_BALBcJ_G0033844__Lyl1	96.4801	0.861857	0.319677	2.69603	0.00701719	0.116575
MGP_BALBcJ_G0035217__Vprbp	1549.8	-0.252202	0.0935697	-2.69534	0.00703169	0.116575
MGP_BALBcJ_G0034496__Kirrel3	48.5492	0.835295	0.310117	2.69348	0.00707105	0.117105
MGP_BALBcJ_G0026758__Blcap	1545.34	-0.417479	0.155138	-2.69101	0.00712364	0.117852
MGP_BALBcJ_G0029884__Asphd2	18.2105	1.42398	0.52941	2.68975	0.00715055	0.118174
MGP_BALBcJ_G0025748__Cobll1	1647.46	-0.332398	0.123614	-2.689	0.00716672	0.118318
MGP_BALBcJ_G0028278__Abca1	11769	-0.53663	0.199646	-2.68791	0.00719004	0.11858
MGP_BALBcJ_G0020554__Tmed9	3929.08	0.265851	0.0989892	2.68566	0.00723872	0.119134
MGP_BALBcJ_G0031212__Foxj2	1247.3	-0.233569	0.0869627	-2.68586	0.00723437	0.119134
MGP_BALBcJ_G0033076__Tacc2	3334.74	-1.55633	0.579774	-2.68438	0.00726641	0.119466
MGP_BALBcJ_G0028078__Bach2	221.26	-1.00636	0.37499	-2.68371	0.00728104	0.119583
MGP_BALBcJ_G0005687__Gm26549	37.4589	-0.862344	0.321379	-2.68326	0.00729073	0.119618
MGP_BALBcJ_G0035363__Tmppe	427.88	-0.327869	0.122306	-2.68073	0.00734611	0.120402
MGP_BALBcJ_G0021354__Atp12a	227.952	-0.86404	0.322407	-2.67996	0.00736299	0.120554
MGP_BALBcJ_G0015856__Uggt1	6713	0.312187	0.116538	2.67885	0.0073875	0.120654
MGP_BALBcJ_G0024633__Lrfn4	793.908	-0.344357	0.128538	-2.67903	0.00738355	0.120654
MGP_BALBcJ_G0025101__Pgam1	4284.19	0.348158	0.129975	2.67865	0.00739198	0.120654
MGP_BALBcJ_G0015854__Plekhb2	817.194	0.331044	0.123628	2.67774	0.00741196	0.120856
MGP_BALBcJ_G0034245__Agt	244.055	0.678238	0.253378	2.67678	0.00743331	0.12108
MGP_BALBcJ_G0015226__4930594M22Rik	15.5905	-1.36935	0.51187	-2.6752	0.00746847	0.121278
MGP_BALBcJ_G0021861__Fam49b	1441.03	-0.386627	0.144496	-2.67569	0.00745765	0.121278
MGP_BALBcJ_G0030714__Nfe2l3	3347.83	-0.356147	0.133115	-2.67549	0.00746212	0.121278
MGP_BALBcJ_G0016264__Ankmy1	13.337	-1.28354	0.480216	-2.67284	0.00752117	0.121918
MGP_BALBcJ_G0021912__Ly6a	1185.54	0.5389	0.201627	2.67275	0.00752323	0.121918
MGP_BALBcJ_G0016793__Kif26b	91.5435	0.973997	0.364541	2.67184	0.00754361	0.122123
MGP_BALBcJ_G0002795__Gm15867	76.1468	-0.751742	0.281742	-2.66819	0.00762616	0.122884
MGP_BALBcJ_G0019756__Dact1	56.3953	-0.853508	0.319776	-2.66908	0.00760594	0.122884
MGP_BALBcJ_G0020459__Atxn1	1267.33	-0.276777	0.103764	-2.66736	0.00764487	0.122884
MGP_BALBcJ_G0021672__Nup155	675.004	-0.346541	0.129867	-2.66842	0.0076208	0.122884
MGP_BALBcJ_G0022705__Tctex1d2	173.667	0.411929	0.154426	2.66748	0.00764217	0.122884
MGP_BALBcJ_G0028002__Fam110b	52.8601	0.680603	0.255135	2.66762	0.00763912	0.122884
MGP_BALBcJ_G0032523__Tsku	171.168	0.59093	0.221458	2.66835	0.00762237	0.122884
MGP_BALBcJ_G0024090__Arhgap12	1281.54	-0.23175	0.0869514	-2.66528	0.00769245	0.123274
MGP_BALBcJ_G0030823__Gng12	2510.77	0.289856	0.108751	2.66532	0.00769145	0.123274
MGP_BALBcJ_G0033332__Col4a1	10568.9	0.633182	0.237545	2.66553	0.00768675	0.123274
MGP_BALBcJ_G0019573__Grhl1	1248.67	-0.387833	0.145591	-2.66385	0.00772529	0.123675
MGP_BALBcJ_G0007357__A130014A01Rik	119.699	-0.5495	0.206381	-2.66256	0.00775496	0.124025
MGP_BALBcJ_G0019814__Plekhh1	405.556	0.81332	0.305617	2.66124	0.00778545	0.124387
MGP_BALBcJ_G0036239__Arhgap6	466.935	0.371613	0.139765	2.65883	0.00784121	0.125151
MGP_BALBcJ_G0034032__Gfod2	520.082	-0.37657	0.141671	-2.65807	0.00785904	0.12531
MGP_BALBcJ_G0032162__Kcnc3	101.716	0.536515	0.201873	2.65769	0.00786781	0.125324
MGP_BALBcJ_G0016463__Rnpep	2405.78	0.300846	0.113285	2.65567	0.00791522	0.125514
MGP_BALBcJ_G0016580__Tnr	9.70293	-2.11928	0.797778	-2.65648	0.00789606	0.125514
MGP_BALBcJ_G0017316__S100b	10.3603	1.94765	0.733353	2.65581	0.00791175	0.125514
MGP_BALBcJ_G0019743__Sav1	1434.22	-0.232807	0.0876406	-2.65638	0.00789845	0.125514
MGP_BALBcJ_G0020153__Pitrm1	1152.43	0.206506	0.0777823	2.65493	0.00793256	0.125514
MGP_BALBcJ_G0025109__Morn4	41.5243	0.815465	0.307097	2.6554	0.0079215	0.125514
MGP_BALBcJ_G0026887__B4galt5	555.823	1.00183	0.377362	2.65482	0.00793518	0.125514
MGP_BALBcJ_G0022683__Xxylt1	461.008	0.333358	0.125616	2.65378	0.00795946	0.125673
MGP_BALBcJ_G0030471__Cadps2	937.767	-0.302454	0.113974	-2.65372	0.0079611	0.125673
MGP_BALBcJ_G0027803__F3	2613.02	0.667335	0.25156	2.65278	0.0079831	0.12577
MGP_BALBcJ_G0028875__Slc9a1	2106.99	0.261438	0.0985466	2.65294	0.00797937	0.12577
MGP_BALBcJ_G0001554__NA	12.3837	-2.05935	0.776567	-2.65186	0.00800485	0.125844
MGP_BALBcJ_G0021257__Mettl3	564.749	-0.315478	0.118955	-2.65207	0.00799994	0.125844
MGP_BALBcJ_G0022825__Phldb2	296.687	0.476305	0.179648	2.65132	0.00801771	0.125844
MGP_BALBcJ_G0029508__NA	564.837	0.330852	0.124791	2.65124	0.00801957	0.125844
MGP_BALBcJ_G0023389__Spdef	21.9005	1.50569	0.568361	2.64918	0.00806873	0.12649
MGP_BALBcJ_G0003486__Gm13375	78.8254	-0.637634	0.240897	-2.64692	0.00812286	0.12663
MGP_BALBcJ_G0016764__Spta1	9.45225	3.09178	1.16778	2.64758	0.00810712	0.12663
MGP_BALBcJ_G0020868__Dimt1	157.635	-0.518726	0.19587	-2.64832	0.0080892	0.12663
MGP_BALBcJ_G0021071__Nt5dc2	92.4139	0.775633	0.293081	2.64648	0.00813349	0.12663
MGP_BALBcJ_G0026497__Hspa12b	271.326	0.39573	0.149531	2.64647	0.00813359	0.12663
MGP_BALBcJ_G0032846__Adm	137.614	0.775077	0.292856	2.64662	0.00813013	0.12663
MGP_BALBcJ_G0036118__Acsl4	12490.7	-0.463974	0.175222	-2.64792	0.0080989	0.12663
MGP_BALBcJ_G0035348__Epm2aip1	2581.47	-0.280057	0.105841	-2.64602	0.00814456	0.126676
MGP_BALBcJ_G0035139__Pik3cb	1918.31	-0.330435	0.124916	-2.64526	0.00816274	0.126835
MGP_BALBcJ_G0003849__Bach2os	81.6606	1.15511	0.436927	2.64371	0.00820037	0.127176
MGP_BALBcJ_G0031229__Cd163	999.37	0.757367	0.286481	2.64369	0.00820076	0.127176
MGP_BALBcJ_G0020126__Sp4	177.591	-0.652654	0.246988	-2.64245	0.00823083	0.127518
MGP_BALBcJ_G0027623__NA	1787.03	0.628763	0.237985	2.64203	0.00824104	0.127551
MGP_BALBcJ_G0017744__Tspan31	2133.81	0.191405	0.0724825	2.6407	0.00827345	0.127803
MGP_BALBcJ_G0021472__Dock5	710.952	-0.466487	0.176656	-2.64065	0.00827479	0.127803
MGP_BALBcJ_G0032189__Rcn3	729.35	0.830626	0.314587	2.64037	0.00828151	0.127803
MGP_BALBcJ_G0021815__Mal2	1778.5	-0.439035	0.166349	-2.63924	0.00830913	0.128059
MGP_BALBcJ_G0031451__Cmas	2349.27	0.250282	0.0948385	2.63903	0.00831427	0.128059
MGP_BALBcJ_G0017692__Frs2	1493.42	-0.233547	0.0885234	-2.63825	0.0083334	0.128123
MGP_BALBcJ_G0031538__Tmem150b	16.1907	1.17653	0.445957	2.63821	0.00833456	0.128123
MGP_BALBcJ_G0019749__Frmd6	1143.44	0.378234	0.1434	2.63761	0.00834919	0.128223
MGP_BALBcJ_G0021559__Rgcc	224.542	0.469264	0.177971	2.63675	0.00837047	0.128426
MGP_BALBcJ_G0017308__Mmp11	266.916	-0.551054	0.209131	-2.63497	0.00841441	0.128478
MGP_BALBcJ_G0025029__Acta2	9411.99	0.588798	0.223404	2.63557	0.0083995	0.128478
MGP_BALBcJ_G0025239__Ccdc186	1576.19	-0.257783	0.0978307	-2.63499	0.00841407	0.128478
MGP_BALBcJ_G0031875__Cyp2b19	130.58	-1.43413	0.544208	-2.63526	0.00840728	0.128478
MGP_BALBcJ_G0033327__Lig4	341.664	-0.38369	0.145571	-2.63575	0.00839515	0.128478
MGP_BALBcJ_G0030418__Pdk4	36559	0.739138	0.280579	2.63434	0.0084302	0.128595
MGP_BALBcJ_G0024551__Setbp1	448.954	-0.381294	0.14479	-2.63343	0.00845264	0.128813
MGP_BALBcJ_G0021463__Dpysl2	268.96	0.475321	0.180585	2.63212	0.00848532	0.129187
MGP_BALBcJ_G0016027__Adam23	194.167	0.648247	0.246328	2.63164	0.00849739	0.129247
MGP_BALBcJ_G0018894__Luc7l3	3314.64	-0.219179	0.0833163	-2.63068	0.00852144	0.129488
MGP_BALBcJ_G0034239__Abcb10	527.79	-0.251744	0.0957101	-2.63028	0.00853153	0.129517
MGP_BALBcJ_G0021456__Ephx2	799.976	-0.683181	0.259778	-2.62987	0.00854184	0.12955
MGP_BALBcJ_G0020113__Crip2	3398.06	-0.362938	0.138135	-2.62741	0.00860367	0.130314
MGP_BALBcJ_G0024777__Polr2g	869.101	0.277671	0.10569	2.62722	0.00860865	0.130314
MGP_BALBcJ_G0026557__Snx5	2172.2	0.408379	0.155576	2.62495	0.00866619	0.130935
MGP_BALBcJ_G0028797__S100pbp	1114.72	-0.307256	0.117051	-2.62497	0.00866554	0.130935
MGP_BALBcJ_G0020423__Txndc5	4812.34	0.236072	0.0899676	2.62397	0.00869125	0.131072
MGP_BALBcJ_G0020510__Ror2	34.7177	1.14096	0.43504	2.62265	0.00872487	0.131072
MGP_BALBcJ_G0024488__Cidea	5844.98	-0.507208	0.19337	-2.62299	0.00871606	0.131072
MGP_BALBcJ_G0025274__Fam171a1	302.703	0.496693	0.189356	2.62307	0.00871425	0.131072
MGP_BALBcJ_G0032947__Tnrc6a	3489.88	-0.425114	0.162084	-2.6228	0.00872112	0.131072
MGP_BALBcJ_G0034104__St3gal2	288.72	0.662927	0.252761	2.62274	0.00872248	0.131072
MGP_BALBcJ_G0028243__NA	47.9583	0.895132	0.341468	2.62142	0.00875643	0.131297
MGP_BALBcJ_G0029560__N4bp2	643.957	-0.476654	0.18182	-2.62158	0.00875239	0.131297
MGP_BALBcJ_G0024683__Rnaseh2c	226.329	-0.47116	0.179848	-2.61978	0.00879877	0.131736
MGP_BALBcJ_G0030694__Tmem176b	8041.71	-0.231888	0.0885191	-2.61964	0.00880234	0.131736
MGP_BALBcJ_G0015771__Cspp1	811.169	-0.271265	0.103616	-2.61798	0.00884526	0.132004
MGP_BALBcJ_G0019662__G2e3	751.29	-0.276157	0.105471	-2.61832	0.00883639	0.132004
MGP_BALBcJ_G0033587__Aga	755.144	0.297441	0.113609	2.61811	0.00884181	0.132004
MGP_BALBcJ_G0020203__Sfrp4	78.0624	1.2968	0.495617	2.61654	0.00888262	0.132437
MGP_BALBcJ_G0015579__Gm20536	8.07472	2.09416	0.801401	2.61312	0.00897196	0.133499
MGP_BALBcJ_G0015972__Mars2	450.876	-0.391466	0.149857	-2.61226	0.00899459	0.133499
MGP_BALBcJ_G0025617__Psmd5	1127.2	-0.261646	0.100163	-2.61221	0.00899598	0.133499
MGP_BALBcJ_G0029348__Rbm33	2338.03	-0.339411	0.12987	-2.61346	0.00896308	0.133499
MGP_BALBcJ_G0032302__Siglech	318.884	1.01192	0.38736	2.61236	0.00899199	0.133499
MGP_BALBcJ_G0027773__S1pr1	927.791	0.469694	0.179849	2.6116	0.00901188	0.13361
MGP_BALBcJ_G0023998__Strn	1471.77	-0.252074	0.0965452	-2.61095	0.00902921	0.133676
MGP_BALBcJ_G0034310__Arhgap42	5066.51	-0.384826	0.147398	-2.6108	0.00903317	0.133676
MGP_BALBcJ_G0022770__Fstl1	3388.65	0.886005	0.33941	2.61043	0.0090429	0.133695
MGP_BALBcJ_G0015988__Clk1	4664.61	-0.259452	0.0994362	-2.60923	0.00907473	0.13404
MGP_BALBcJ_G0030237__Zfp113	827.26	-0.321595	0.123294	-2.60836	0.00909766	0.134254
MGP_BALBcJ_G0018177__Rasgef1c	290.877	-0.660402	0.253405	-2.60611	0.00915758	0.135013
MGP_BALBcJ_G0022938__Jam2	1216.42	0.430127	0.16529	2.60226	0.0092612	0.135489
MGP_BALBcJ_G0023952__Arhgap28	614.478	-0.559302	0.214905	-2.60256	0.0092531	0.135489
MGP_BALBcJ_G0024801__Fth1	244979	0.500472	0.192338	2.60205	0.00926685	0.135489
MGP_BALBcJ_G0028208__Clta	4391.3	0.19991	0.0768047	2.60284	0.00924555	0.135489
MGP_BALBcJ_G0029615__Kit	3602.43	-1.18815	0.456233	-2.60427	0.00920707	0.135489
MGP_BALBcJ_G0032877__Plekha7	772.785	-0.350654	0.13473	-2.60265	0.00925055	0.135489
MGP_BALBcJ_G0034920__Hacd3	3482.25	-0.361298	0.138775	-2.60349	0.00922809	0.135489
MGP_BALBcJ_G0034986__Zfp280d	795.73	-0.282623	0.108557	-2.60345	0.00922895	0.135489
MGP_BALBcJ_G0035968__Atrx	5886.59	-0.255591	0.0982102	-2.60249	0.00925504	0.135489
MGP_BALBcJ_G0016324__Serpinb8	190.296	0.688528	0.264831	2.59988	0.00932575	0.136225
MGP_BALBcJ_G0015390__BB218582	6.69245	2.29153	0.88206	2.59793	0.00937864	0.136515
MGP_BALBcJ_G0026973__Col9a3	644.155	0.425034	0.163581	2.59831	0.00936846	0.136515
MGP_BALBcJ_G0028775__Tmem35b	175.544	-0.488838	0.188111	-2.59867	0.0093586	0.136515
MGP_BALBcJ_G0028957__C1qc	2048.82	0.631939	0.243252	2.59788	0.0093801	0.136515
MGP_BALBcJ_G0020705__Nkd2	134.233	1.47888	0.569376	2.59738	0.00939381	0.136589
MGP_BALBcJ_G0030599__Mgam	260.577	-1.05556	0.406528	-2.59653	0.00941713	0.136678
MGP_BALBcJ_G0036040__Drp2	243.714	0.906104	0.348962	2.59657	0.00941597	0.136678
MGP_BALBcJ_G0017814__Ikzf4	182.547	-0.529907	0.204214	-2.59486	0.009463	0.137218
MGP_BALBcJ_G0018100__Wwc1	2574.72	-0.332525	0.12817	-2.5944	0.00947557	0.137274
MGP_BALBcJ_G0025892__Tnks1bp1	2282.77	-0.281136	0.108393	-2.59366	0.00949592	0.137318
MGP_BALBcJ_G0035430__Ackr2	49.3443	-0.676441	0.260798	-2.59373	0.00949403	0.137318
MGP_BALBcJ_G0000082__Ighv1-15	16.1354	2.91561	1.1243	2.59327	0.00950674	0.137349
MGP_BALBcJ_G0022550__Slc7a4	494.479	0.567114	0.218845	2.5914	0.00955874	0.137724
MGP_BALBcJ_G0033956__Cngb1	131.064	-0.79582	0.307042	-2.5919	0.00954486	0.137724
MGP_BALBcJ_G0035106__Slc9a9	156.08	0.813376	0.313839	2.59169	0.00955044	0.137724
MGP_BALBcJ_G0030428__Col28a1	118.686	0.56271	0.217179	2.591	0.00956979	0.137758
MGP_BALBcJ_G0035089__Tmed3	3412.7	0.401216	0.154894	2.59027	0.00959016	0.137926
MGP_BALBcJ_G0033788__Smad1	943.101	-0.374419	0.144625	-2.58889	0.00962854	0.138352
MGP_BALBcJ_G0025342__NA	70.7174	0.797699	0.308269	2.58767	0.00966274	0.138593
MGP_BALBcJ_G0031747__Opa3	1062.98	0.203035	0.0784578	2.58783	0.0096583	0.138593
MGP_BALBcJ_G0017681__Ptprr	10.0319	1.57673	0.609453	2.58712	0.00967811	0.138674
MGP_BALBcJ_G0018782__Slfn3	30.6814	0.975251	0.377095	2.58622	0.00970342	0.138674
MGP_BALBcJ_G0020573__Smad5	2469.92	-0.291504	0.112699	-2.58658	0.00969324	0.138674
MGP_BALBcJ_G0024137__Dsc3	23.083	2.86928	1.10943	2.58627	0.00970204	0.138674
MGP_BALBcJ_G0019832__Srsf5	9975.73	-0.188505	0.0729119	-2.58538	0.00972718	0.138888
MGP_BALBcJ_G0021862__Asap1	2907.99	-0.604086	0.233799	-2.58379	0.00977222	0.139406
MGP_BALBcJ_G0030331__Lmtk2	1895.79	-0.244165	0.0945139	-2.58338	0.00978382	0.139446
MGP_BALBcJ_G0035855__Gk	1047.44	-0.719111	0.278413	-2.58289	0.00979765	0.139518
MGP_BALBcJ_G0011561__NA	724.84	0.252989	0.0980048	2.5814	0.00984018	0.139778
MGP_BALBcJ_G0027405__Adam15	2288.98	0.301541	0.116817	2.58132	0.00984241	0.139778
MGP_BALBcJ_G0035221__Mapkapk3	1246.38	-0.251841	0.0975511	-2.58163	0.00983351	0.139778
MGP_BALBcJ_G0002957__2810001G20Rik	40.9967	-0.929653	0.360289	-2.5803	0.00987158	0.140067
MGP_BALBcJ_G0022385__Npff	55.0335	-0.731164	0.283504	-2.57903	0.00990791	0.140339
MGP_BALBcJ_G0025048__Tnks2	5597.21	-0.17638	0.0683908	-2.57901	0.0099085	0.140339
MGP_BALBcJ_G0033061__NA	254.571	0.546518	0.211938	2.57867	0.00991811	0.14035
MGP_BALBcJ_G0018409__Hs3st3b1	846.659	-0.567666	0.220341	-2.57631	0.00998607	0.14106
MGP_BALBcJ_G0032240__Kcnj14	33.3543	1.28784	0.499849	2.57645	0.00998198	0.14106
MGP_BALBcJ_G0028970__Alpl	598.273	0.561255	0.21792	2.57551	0.0100091	0.14126
MGP_BALBcJ_G0015842__Zfp451	1014.7	-0.301653	0.117175	-2.57437	0.0100423	0.141476
MGP_BALBcJ_G0029213__Mxra8	384.369	0.580182	0.225362	2.57445	0.0100401	0.141476
MGP_BALBcJ_G0017986__Ikzf1	1063.01	-0.385043	0.149655	-2.57288	0.0100857	0.141744
MGP_BALBcJ_G0020393__Serpinb6a	1537.87	0.34226	0.133046	2.57249	0.0100971	0.141744
MGP_BALBcJ_G0021448__Scara5	994.143	-1.7288	0.671856	-2.57318	0.010077	0.141744
MGP_BALBcJ_G0032179__Cpt1c	71.1849	0.653587	0.254039	2.57278	0.0100886	0.141744
MGP_BALBcJ_G0029974__Tbx5	7.42768	1.91313	0.743897	2.57177	0.010118	0.141912
MGP_BALBcJ_G0018270__Sparc	14735.4	0.822876	0.320162	2.57019	0.0101644	0.142059
MGP_BALBcJ_G0020254__Hist1h4i	33.1552	0.985846	0.383453	2.57097	0.0101414	0.142059
MGP_BALBcJ_G0025007__Uhrf2	2219.97	-0.218831	0.0851271	-2.57064	0.0101512	0.142059
MGP_BALBcJ_G0030994__Podxl2	134.946	0.653454	0.254242	2.5702	0.0101638	0.142059
MGP_BALBcJ_G0018092__Foxi1	103.232	-1.28457	0.500015	-2.56906	0.0101973	0.142395
MGP_BALBcJ_G0022335__Atg101	390.871	-0.274227	0.106761	-2.56859	0.0102112	0.142463
MGP_BALBcJ_G0034389__Zfp266	1545.77	-0.206942	0.0805943	-2.56771	0.0102374	0.142702
MGP_BALBcJ_G0019085__Krt19	9474.03	0.364142	0.141855	2.567	0.0102583	0.142868
MGP_BALBcJ_G0027911__Gbp7	586.155	-0.392653	0.153042	-2.56565	0.0102984	0.1433
MGP_BALBcJ_G0028745__Snip1	435.405	-0.283212	0.110411	-2.56507	0.0103154	0.143411
MGP_BALBcJ_G0022916__Vgll3	301.998	1.04636	0.408053	2.56428	0.0103389	0.143612
MGP_BALBcJ_G0028394__Plin2	74321.3	-0.302744	0.118087	-2.56373	0.0103554	0.143715
MGP_BALBcJ_G0021875__Wisp1	35.2867	0.850939	0.331994	2.56312	0.0103737	0.143717
MGP_BALBcJ_G0024632__Pcx	3559.21	-0.783321	0.30559	-2.56331	0.010368	0.143717
MGP_BALBcJ_G0033043__Zfp646	1432.89	-0.263417	0.102879	-2.56046	0.0104535	0.144444
MGP_BALBcJ_G0033441__Golga7	2823.4	-0.251734	0.0983054	-2.56074	0.0104451	0.144444
MGP_BALBcJ_G0033583__Wwc2	1201.87	-0.220031	0.0859248	-2.56074	0.010445	0.144444
MGP_BALBcJ_G0022110__Smdt1	1663.6	0.329192	0.128588	2.56006	0.0104654	0.144482
MGP_BALBcJ_G0027178__Proser1	1118.27	-0.32442	0.126743	-2.55967	0.0104771	0.144519
MGP_BALBcJ_G0034952__Aph1b	82.0667	0.584229	0.228296	2.55909	0.0104947	0.144635
MGP_BALBcJ_G0018126__Lsm11	190.067	-0.395427	0.154664	-2.55668	0.0105675	0.145386
MGP_BALBcJ_G0020665__Zfp874a	796.164	-0.250921	0.0981321	-2.55698	0.0105587	0.145386
MGP_BALBcJ_G0001281__NA	445.841	-0.958929	0.375151	-2.55612	0.0105848	0.145411
MGP_BALBcJ_G0016420__Lrrn2	62.9448	0.768247	0.300616	2.55558	0.0106011	0.145411
MGP_BALBcJ_G0021927__Gsdmd	265.04	0.635962	0.248868	2.55542	0.010606	0.145411
MGP_BALBcJ_G0030520__Tmem209	560.415	-0.292091	0.11428	-2.55592	0.0105909	0.145411
MGP_BALBcJ_G0031522__1700027J19Rik	116.5	-0.530769	0.207821	-2.55397	0.0106503	0.145891
MGP_BALBcJ_G0021813__Tnfrsf11b	117.068	1.5843	0.620746	2.55225	0.0107029	0.146486
MGP_BALBcJ_G0026099__Ptprj	1282.35	-0.461114	0.180738	-2.55128	0.0107328	0.146768
MGP_BALBcJ_G0019257__Smurf2	1693.93	-0.230692	0.0904738	-2.54982	0.0107778	0.147256
MGP_BALBcJ_G0017147__Hace1	439.701	-0.321453	0.126089	-2.54941	0.0107907	0.147305
MGP_BALBcJ_G0030067__Mphosph9	323.862	0.355136	0.139372	2.54811	0.0108307	0.147724
MGP_BALBcJ_G0028445__Cyp2j6	485.599	0.307928	0.120869	2.54762	0.010846	0.147806
MGP_BALBcJ_G0025693__Epc2	1019.05	-0.381146	0.149668	-2.54661	0.0108776	0.14811
MGP_BALBcJ_G0019117__Atp6v0a1	3720.09	0.340565	0.133771	2.54587	0.0109005	0.148294
MGP_BALBcJ_G0019168__Hdac5	2012.31	-0.293657	0.115386	-2.54499	0.0109281	0.148542
MGP_BALBcJ_G0023995__Crim1	1100.97	0.342881	0.134745	2.54467	0.010938	0.148549
MGP_BALBcJ_G0023079__Zdhhc14	169.062	0.368149	0.144695	2.54431	0.0109495	0.148578
MGP_BALBcJ_G0023299__Cramp1l	1293.73	-0.24063	0.0946508	-2.54229	0.011013	0.149311
MGP_BALBcJ_G0024138__Dsc2	54.9816	1.65727	0.652093	2.54147	0.0110388	0.149533
MGP_BALBcJ_G0020710__Tppp	247.958	-0.896888	0.353	-2.54076	0.0110612	0.149709
MGP_BALBcJ_G0019409__Lgals3bp	1570.06	0.629593	0.247838	2.54034	0.0110744	0.149759
MGP_BALBcJ_G0028038__Tmem55a	886.339	0.248259	0.0977754	2.53907	0.0111146	0.150175
MGP_BALBcJ_G0022786__Arhgap31	864.079	0.345189	0.136014	2.5379	0.0111519	0.150551
MGP_BALBcJ_G0017683__Ptprb	2169.4	0.308022	0.12139	2.53746	0.0111662	0.150615
MGP_BALBcJ_G0019864__Acot6	497.613	0.535377	0.211031	2.53695	0.0111822	0.150657
MGP_BALBcJ_G0035373__Osbpl10	762.019	-0.360113	0.141958	-2.53676	0.0111883	0.150657
MGP_BALBcJ_G0033804__Ucp1	29.2258	-2.88543	1.13763	-2.53635	0.0112015	0.150706
MGP_BALBcJ_G0022777__Gm21987	212.456	-0.403901	0.15933	-2.535	0.0112449	0.150731
MGP_BALBcJ_G0025618__Cutal	145.493	-0.882548	0.348105	-2.53529	0.0112353	0.150731
MGP_BALBcJ_G0027185__Supt20	1434.72	-0.171645	0.0677153	-2.53481	0.0112509	0.150731
MGP_BALBcJ_G0034261__Ntpcr	407.18	0.408954	0.161276	2.53574	0.0112209	0.150731
MGP_BALBcJ_G0036230__Rab9	589.583	0.286767	0.11311	2.53529	0.0112354	0.150731
MGP_BALBcJ_G0026709__Ncoa6	2353.17	-0.276105	0.10894	-2.53447	0.0112617	0.150749
MGP_BALBcJ_G0028112__Topors	1260.78	-0.24874	0.0982128	-2.53266	0.01132	0.151401
MGP_BALBcJ_G0027219__P2ry12	65.2927	0.954891	0.377438	2.52993	0.0114086	0.152424
MGP_BALBcJ_G0033348__Mcf2l	604.501	0.503299	0.198955	2.52971	0.0114157	0.152424
MGP_BALBcJ_G0024608__Gstp2	797.156	0.251078	0.0992857	2.52884	0.0114439	0.152672
MGP_BALBcJ_G0018065__Cpeb4	2856.21	-0.198657	0.0785747	-2.52826	0.0114631	0.15269
MGP_BALBcJ_G0023522__H2-Oa	14.3784	2.9149	1.15295	2.52821	0.0114645	0.15269
MGP_BALBcJ_G0018502__Tnk1	2026.92	-0.3007	0.119052	-2.52579	0.0115438	0.152949
MGP_BALBcJ_G0023224__Mmp25	157.748	-1.01488	0.401699	-2.52647	0.0115215	0.152949
MGP_BALBcJ_G0029013__Padi3	15.1788	1.36244	0.539463	2.52556	0.0115515	0.152949
MGP_BALBcJ_G0029408__Rbks	104.969	-0.471586	0.186707	-2.5258	0.0115434	0.152949
MGP_BALBcJ_G0029527__Anapc4	1392.89	-0.219629	0.0869098	-2.52709	0.0115012	0.152949
MGP_BALBcJ_G0029549__Klhl5	924.046	0.330396	0.130812	2.52573	0.0115458	0.152949
MGP_BALBcJ_G0032935__Gga2	1038.36	0.353248	0.13981	2.52663	0.0115163	0.152949
MGP_BALBcJ_G0026775__Fam83d	10.4758	1.8024	0.713968	2.52449	0.0115868	0.153288
MGP_BALBcJ_G0027332__Kirrel	579.577	0.376911	0.149326	2.52407	0.0116005	0.153341
MGP_BALBcJ_G0023964__Lpin2	644.217	0.480168	0.190406	2.52181	0.0116754	0.153964
MGP_BALBcJ_G0026813__Wfdc5	112.236	-1.2255	0.485971	-2.52177	0.0116767	0.153964
MGP_BALBcJ_G0030982__Hmces	455.574	-0.301409	0.119501	-2.52224	0.0116609	0.153964
MGP_BALBcJ_G0004383__Gm26550	83.7996	-0.583891	0.231651	-2.52056	0.0117169	0.154108
MGP_BALBcJ_G0029468__Tbc1d14	3226.78	-0.389185	0.154395	-2.52072	0.0117116	0.154108
MGP_BALBcJ_G0033789__Otud4	2565.8	-0.244231	0.096874	-2.52112	0.0116981	0.154108
MGP_BALBcJ_G0019107__Kat2a	1013.75	0.321951	0.12781	2.51898	0.0117695	0.154544
MGP_BALBcJ_G0024299__Taf7	289.256	-0.346567	0.137571	-2.51918	0.011763	0.154544
MGP_BALBcJ_G0027372__Mex3a	796.192	-0.522584	0.207496	-2.51852	0.0117848	0.154616
MGP_BALBcJ_G0035768__Zfp185	385.171	-0.701916	0.278774	-2.51786	0.0118069	0.154778
MGP_BALBcJ_G0023060__NA	95.8658	0.840158	0.333765	2.51721	0.0118287	0.154937
MGP_BALBcJ_G0018385__Fam83g	219.824	-0.63802	0.253635	-2.51551	0.0118861	0.155559
MGP_BALBcJ_G0033192__Pkp3	1440.55	-0.261805	0.104089	-2.5152	0.0118965	0.155568
MGP_BALBcJ_G0018911__Col1a1	12993.3	1.22892	0.489148	2.51236	0.0119926	0.156565
MGP_BALBcJ_G0028956__C1qb	1999.79	0.649032	0.258329	2.51242	0.0119906	0.156565
MGP_BALBcJ_G0021152__Ptgdr	23.5454	-1.0686	0.425777	-2.50978	0.0120807	0.157111
MGP_BALBcJ_G0025094__Lcor	387.929	-0.299693	0.119392	-2.51016	0.0120678	0.157111
MGP_BALBcJ_G0026609__Abhd12	1312.07	0.315639	0.125738	2.51029	0.0120634	0.157111
MGP_BALBcJ_G0029605__Sgcb	239.595	0.365847	0.145771	2.50974	0.0120819	0.157111
MGP_BALBcJ_G0033044__Prss53	9.5218	2.03138	0.80944	2.50961	0.0120865	0.157111
MGP_BALBcJ_G0033584__Dctd	110.803	0.799266	0.31851	2.50939	0.0120939	0.157111
MGP_BALBcJ_G0030944__Nat8f4	268.759	-0.423793	0.168997	-2.5077	0.0121519	0.157736
MGP_BALBcJ_G0034971__Myo1e	2616.17	-0.352534	0.1406	-2.50736	0.0121637	0.157759
MGP_BALBcJ_G0016346__Dbi	9991.71	-0.518215	0.206839	-2.50541	0.012231	0.158403
MGP_BALBcJ_G0033702__Rab3a	305.437	0.87957	0.351078	2.50534	0.0122333	0.158403
MGP_BALBcJ_G0024445__Ppargc1b	140.975	-0.597138	0.238385	-2.50493	0.0122474	0.158457
MGP_BALBcJ_G0025086__Ccnj	367.643	-0.322948	0.128947	-2.50451	0.0122622	0.158519
MGP_BALBcJ_G0017534__Ckap4	510.591	0.833027	0.332806	2.50304	0.0123132	0.158919
MGP_BALBcJ_G0018184__Maml1	1022.84	-0.259383	0.103624	-2.50312	0.0123104	0.158919
MGP_BALBcJ_G0018988__Cacnb1	343.967	-0.648292	0.259033	-2.50274	0.0123236	0.158923
MGP_BALBcJ_G0029908__Ung	319.411	0.413061	0.165088	2.50206	0.0123472	0.159098
MGP_BALBcJ_G0016673__Olfml2b	177.711	0.995213	0.397814	2.50171	0.0123597	0.159129
MGP_BALBcJ_G0027718__Slc16a4	30.5918	0.942828	0.376952	2.50119	0.0123778	0.159233
MGP_BALBcJ_G0023225__Ccdc64b	978.985	-0.561908	0.224715	-2.50053	0.0124007	0.159398
MGP_BALBcJ_G0028040__Tmem64	2601.87	0.507358	0.202943	2.5	0.0124193	0.159508
MGP_BALBcJ_G0016670__Gm7694	1275.28	-0.445989	0.178477	-2.49887	0.0124592	0.159724
MGP_BALBcJ_G0020531__Tspan17	1831.36	0.440862	0.176431	2.49878	0.0124621	0.159724
MGP_BALBcJ_G0022378__Sp1	2911.45	-0.227119	0.0908961	-2.49866	0.0124663	0.159724
MGP_BALBcJ_G0016803__Coq8a	1394.96	-0.554601	0.222077	-2.49734	0.012513	0.160064
MGP_BALBcJ_G0029782__Hsd17b11	2655.17	0.355761	0.14244	2.49762	0.0125032	0.160064
MGP_BALBcJ_G0035890__Zc3h12b	17.434	1.33262	0.533685	2.49701	0.0125246	0.160083
MGP_BALBcJ_G0019176__Slc25a39	3710	0.300778	0.120486	2.49638	0.0125469	0.160233
MGP_BALBcJ_G0029033__Spen	2482.14	-0.290114	0.116227	-2.4961	0.0125566	0.160233
MGP_BALBcJ_G0028996__Capzb	4371.03	0.190563	0.0763638	2.49546	0.0125795	0.160396
MGP_BALBcJ_G0018256__Fnip1	1823.25	0.250545	0.10045	2.49423	0.0126232	0.160823
MGP_BALBcJ_G0019095__P3h4	267.068	0.381584	0.153043	2.49332	0.0126557	0.161098
MGP_BALBcJ_G0019901__Mfsd7c	251.905	0.807898	0.324097	2.49277	0.0126752	0.161098
MGP_BALBcJ_G0023346__Pigq	2162.86	0.269717	0.108193	2.49291	0.01267	0.161098
MGP_BALBcJ_G0000101__Igkv14-126	351.885	3.80982	1.52893	2.49182	0.012709	0.161399
MGP_BALBcJ_G0018105__Ccng1	7225.3	0.234207	0.094037	2.49059	0.0127532	0.161445
MGP_BALBcJ_G0023878__Mydgf	1691.28	0.24696	0.0991574	2.49058	0.0127534	0.161445
MGP_BALBcJ_G0026120__Lrp4	179.514	-0.400363	0.160706	-2.49127	0.0127287	0.161445
MGP_BALBcJ_G0032855__Dkk3	209.506	0.471265	0.189189	2.49098	0.0127391	0.161445
MGP_BALBcJ_G0020914__Emb	336.567	0.799629	0.321112	2.49019	0.0127675	0.161494
MGP_BALBcJ_G0019593__Pxdn	3317.94	0.413247	0.165987	2.48964	0.0127872	0.161603
MGP_BALBcJ_G0034280__Kbtbd3	75.5395	0.536893	0.215673	2.48938	0.0127965	0.161603
MGP_BALBcJ_G0029096__Mthfr	1044.1	-0.320448	0.128742	-2.48907	0.0128077	0.161615
MGP_BALBcJ_G0016520__Hmcn1	263.178	0.657459	0.264215	2.48835	0.0128338	0.161816
MGP_BALBcJ_G0009475__Gm22637	18.8016	-1.15616	0.464862	-2.48711	0.0128785	0.162251
MGP_BALBcJ_G0018207__Col23a1	32.7725	0.813385	0.327125	2.48647	0.0129018	0.162416
MGP_BALBcJ_G0024216__Fam53c	1242.35	-0.220105	0.0885414	-2.4859	0.0129224	0.162545
MGP_BALBcJ_G0024068__Msh6	538.319	-0.281162	0.113134	-2.48521	0.0129474	0.162682
MGP_BALBcJ_G0024786__Lbhd1	63.6204	-0.655685	0.263853	-2.48504	0.0129538	0.162682
MGP_BALBcJ_G0035242__Rbm5	4271.01	-0.202948	0.0817533	-2.48244	0.0130485	0.163742
MGP_BALBcJ_G0029915__Mvk	184.9	0.383526	0.154516	2.48212	0.0130605	0.163762
MGP_BALBcJ_G0027924__Clca3b	5789.46	0.5003	0.201626	2.48133	0.0130894	0.163996
MGP_BALBcJ_G0020948__Ptprg	989.63	0.415048	0.167321	2.48055	0.013118	0.164223
MGP_BALBcJ_G0029769__Fam175a	141.053	-0.578845	0.233431	-2.47972	0.0131485	0.164476
MGP_BALBcJ_G0003260__Gm10863	1443.19	-0.409867	0.165398	-2.47807	0.0132096	0.164606
MGP_BALBcJ_G0015586__Gm44597	54.1487	-0.687767	0.277443	-2.47895	0.0131771	0.164606
MGP_BALBcJ_G0016885__Nek2	41.8021	1.00542	0.405645	2.47857	0.013191	0.164606
MGP_BALBcJ_G0024199__Nrep	1889.44	0.721888	0.291348	2.47775	0.0132212	0.164606
MGP_BALBcJ_G0029214__Dvl1	2259.45	-0.209606	0.0845921	-2.47785	0.0132179	0.164606
MGP_BALBcJ_G0033054__NA	243.821	0.877113	0.353958	2.47802	0.0132115	0.164606
MGP_BALBcJ_G0015346__6530402F18Rik	46.4834	0.793605	0.320415	2.47681	0.0132564	0.164656
MGP_BALBcJ_G0020067__Rcor1	2131.68	-0.314354	0.126906	-2.47707	0.0132466	0.164656
MGP_BALBcJ_G0031772__Apoc1	445.037	-0.548004	0.221232	-2.47705	0.0132472	0.164656
MGP_BALBcJ_G0034191__Slc7a5	3117.57	0.711614	0.287398	2.47606	0.0132843	0.164873
MGP_BALBcJ_G0017261__Egr2	222.108	1.26738	0.512157	2.4746	0.0133387	0.165419
MGP_BALBcJ_G0024638__Rbm4b	295.371	-0.302338	0.122202	-2.47408	0.0133579	0.165527
MGP_BALBcJ_G0032841__NA	12.0453	-1.64369	0.664503	-2.47356	0.0133773	0.165639
MGP_BALBcJ_G0026669__Nol4l	741.797	-0.392468	0.158685	-2.47325	0.0133891	0.165654
MGP_BALBcJ_G0028357__Pappa	66.1207	0.9676	0.391313	2.4727	0.0134097	0.165781
MGP_BALBcJ_G0032946__NA	1829.13	-0.244295	0.0988375	-2.47168	0.0134479	0.166123
MGP_BALBcJ_G0006322__Gm10636	20.7238	1.27695	0.516807	2.47084	0.0134797	0.166386
MGP_BALBcJ_G0033333__Col4a2	7599.4	0.541423	0.219218	2.46979	0.0135192	0.166744
MGP_BALBcJ_G0002158__NA	95.5394	-0.695503	0.281814	-2.46795	0.0135889	0.167258
MGP_BALBcJ_G0019556__Rock2	2623.49	-0.219019	0.0887524	-2.46775	0.0135964	0.167258
MGP_BALBcJ_G0022141__Parvb	243.029	0.583782	0.236634	2.46702	0.0136242	0.167258
MGP_BALBcJ_G0027147__NA	1151.35	-0.337501	0.136777	-2.46753	0.013605	0.167258
MGP_BALBcJ_G0027757__Aknad1	22.689	1.30935	0.530506	2.46812	0.0135824	0.167258
MGP_BALBcJ_G0030631__Zyx	3536.01	-0.489841	0.198552	-2.46706	0.0136227	0.167258
MGP_BALBcJ_G0034257__Tsnax	1634.73	-0.170341	0.0690576	-2.46665	0.0136384	0.167303
MGP_BALBcJ_G0031680__Meis3	330.834	0.379713	0.154014	2.46545	0.0136842	0.167734
MGP_BALBcJ_G0022263__Lalba	37510.7	-0.740346	0.30036	-2.46486	0.0137065	0.167878
MGP_BALBcJ_G0022158__Wnt7b	68.7646	-1.17664	0.477423	-2.46457	0.0137178	0.167886
MGP_BALBcJ_G0030947__Dusp11	5031.86	-0.213997	0.0868733	-2.46332	0.0137657	0.168343
MGP_BALBcJ_G0027166__Elf2	2032.26	-0.165775	0.0673491	-2.46143	0.0138383	0.168786
MGP_BALBcJ_G0027565__Rprd2	1396.99	-0.175204	0.0711843	-2.46127	0.0138445	0.168786
MGP_BALBcJ_G0032306__Nipa1	111.355	0.462953	0.188077	2.4615	0.0138357	0.168786
MGP_BALBcJ_G0033065__Rgs10	230.953	0.761887	0.309524	2.46148	0.0138364	0.168786
MGP_BALBcJ_G0034319__Sesn3	1284.45	-0.437895	0.178013	-2.45991	0.0138972	0.169298
MGP_BALBcJ_G0021041__Il17rd	204.7	-0.465468	0.189267	-2.45931	0.0139203	0.16945
MGP_BALBcJ_G0018140__Timd2	1007.06	-0.407896	0.165954	-2.45788	0.0139759	0.169879
MGP_BALBcJ_G0036031__Srpx2	113.986	0.84478	0.343706	2.45785	0.013977	0.169879
MGP_BALBcJ_G0030382__Uspl1	636.043	-0.326868	0.133091	-2.45597	0.0140504	0.170639
MGP_BALBcJ_G0024494__Cep76	290.483	-0.409214	0.166673	-2.4552	0.0140807	0.170877
MGP_BALBcJ_G0015930__Col3a1	40951.9	0.925094	0.37696	2.45409	0.0141242	0.170888
MGP_BALBcJ_G0018062__Chac2	83.8332	0.515236	0.209955	2.45403	0.0141265	0.170888
MGP_BALBcJ_G0020620__2010111I01Rik	1086.7	-0.28523	0.116229	-2.45402	0.0141267	0.170888
MGP_BALBcJ_G0032450__Zfand6	1571.79	-0.226711	0.0923919	-2.4538	0.0141356	0.170888
MGP_BALBcJ_G0032949__Arhgap17	1051.27	-0.256247	0.104388	-2.45477	0.0140976	0.170888
MGP_BALBcJ_G0029979__Plbd2	2608.14	0.256335	0.104501	2.45295	0.0141692	0.171164
MGP_BALBcJ_G0030003__Erp29	2055.44	0.243355	0.0992358	2.45229	0.014195	0.171305
MGP_BALBcJ_G0031552__Ssc5d	230.095	0.836355	0.341113	2.45184	0.0142126	0.171305
MGP_BALBcJ_G0032851__Ctr9	1654.98	0.195634	0.0797909	2.45183	0.0142133	0.171305
MGP_BALBcJ_G0017082__Frk	1385.48	0.435235	0.177603	2.45061	0.0142614	0.171755
MGP_BALBcJ_G0025708__Fmnl2	756.076	0.460805	0.188065	2.45024	0.014276	0.171799
MGP_BALBcJ_G0023071__Tiam2	380.741	-0.414498	0.169292	-2.44843	0.0143481	0.172537
MGP_BALBcJ_G0018251__P4ha2	433.902	-0.476554	0.194678	-2.4479	0.014369	0.172657
MGP_BALBcJ_G0028091__Pnrc1	2063.34	0.192719	0.0787713	2.44656	0.0144225	0.173168
MGP_BALBcJ_G0033986__Nae1	947.997	-0.227426	0.0930278	-2.44471	0.014497	0.173931
MGP_BALBcJ_G0016490__Nek7	4965.42	-0.404932	0.165717	-2.44352	0.0145446	0.174371
MGP_BALBcJ_G0016612__Prrx1	432.608	0.733595	0.300329	2.44264	0.0145803	0.174403
MGP_BALBcJ_G0030757__Ccdc129	2058.65	1.15111	0.471246	2.4427	0.014578	0.174403
MGP_BALBcJ_G0033799__Il15	264.672	0.587982	0.240679	2.44301	0.0145654	0.174403
MGP_BALBcJ_G0027563__Ecm1	1185.29	0.352778	0.144466	2.44194	0.0146085	0.174608
MGP_BALBcJ_G0021118__Anxa8	582.991	-0.774991	0.317586	-2.44026	0.0146769	0.175293
MGP_BALBcJ_G0019307__Cd300c	26.2833	1.59738	0.65475	2.43969	0.0147	0.175437
MGP_BALBcJ_G0015961__Hecw2	137.804	0.578201	0.237075	2.4389	0.0147321	0.175439
MGP_BALBcJ_G0023343__Mettl26	543.267	-0.394825	0.161889	-2.43887	0.0147334	0.175439
MGP_BALBcJ_G0035959__Rlim	2688.9	-0.314313	0.128868	-2.43903	0.0147266	0.175439
MGP_BALBcJ_G0026101__Fnbp4	2304.7	-0.285484	0.117105	-2.43784	0.0147753	0.175723
MGP_BALBcJ_G0026469__Tgm3	56.369	1.35331	0.555151	2.43774	0.0147794	0.175723
MGP_BALBcJ_G0022451__Ppl	1240.4	-0.442549	0.181609	-2.43682	0.014817	0.175906
MGP_BALBcJ_G0028401__Hacd4	398.647	0.620709	0.254706	2.43696	0.0148111	0.175906
MGP_BALBcJ_G0022266__Ccnt1	1792.08	-0.260684	0.107019	-2.43587	0.0148561	0.175975
MGP_BALBcJ_G0024407__Aldh7a1	1295.78	0.367589	0.150893	2.4361	0.0148467	0.175975
MGP_BALBcJ_G0026797__Gdap1l1	115.134	0.707841	0.290551	2.4362	0.0148425	0.175975
MGP_BALBcJ_G0021507__Reep4	711.404	-0.332844	0.136697	-2.4349	0.014896	0.176184
MGP_BALBcJ_G0024328__Pcdh12	90.6408	0.826647	0.339481	2.43503	0.0148906	0.176184
MGP_BALBcJ_G0029472__Man2b2	997.752	0.334945	0.137581	2.43452	0.0149114	0.176234
MGP_BALBcJ_G0029306__Kmt2e	3336.58	-0.261252	0.10733	-2.43411	0.0149286	0.176307
MGP_BALBcJ_G0002112__NA	26.8664	-1.13298	0.465693	-2.43289	0.0149787	0.176686
MGP_BALBcJ_G0024061__Ttc7	1279.12	0.259546	0.106687	2.43279	0.014983	0.176686
MGP_BALBcJ_G0028834__Nkain1	47.2748	0.965848	0.397294	2.43107	0.0150545	0.177397
MGP_BALBcJ_G0024053__Epas1	4450.48	0.221451	0.0911119	2.43054	0.0150764	0.177522
MGP_BALBcJ_G0025422__Ptgds	48.8102	1.15792	0.476459	2.43026	0.015088	0.177528
MGP_BALBcJ_G0004163__Abhd11os	336.626	-0.657044	0.270499	-2.42901	0.0151402	0.177746
MGP_BALBcJ_G0026362__Ckmt1	325.214	0.516485	0.212617	2.42917	0.0151333	0.177746
MGP_BALBcJ_G0033347__Atp11a	9791.99	0.309484	0.127387	2.42947	0.0151208	0.177746
MGP_BALBcJ_G0021669__Egflam	190.116	0.577911	0.238132	2.42685	0.0152307	0.178677
MGP_BALBcJ_G0027921__Sh3glb1	4651.36	-0.168019	0.0692459	-2.42641	0.0152492	0.178761
MGP_BALBcJ_G0019653__Pnpla8	3270.56	-0.24356	0.100468	-2.42425	0.0153401	0.179602
MGP_BALBcJ_G0024496__Ptpn2	1376.81	-0.474018	0.195548	-2.42405	0.0153484	0.179602
MGP_BALBcJ_G0027077__Naaladl2	1062.01	-0.409399	0.168901	-2.4239	0.0153549	0.179602
MGP_BALBcJ_G0017287__Rab36	25.5944	0.938536	0.387302	2.42327	0.0153815	0.179663
MGP_BALBcJ_G0028396__Rps6	7472.34	-0.171267	0.0706769	-2.42324	0.0153829	0.179663
MGP_BALBcJ_G0026540__Sptlc3	33.8193	1.2704	0.524407	2.42255	0.015412	0.17987
MGP_BALBcJ_G0022282__Lmbr1l	526.789	-0.433084	0.178834	-2.42171	0.0154475	0.180052
MGP_BALBcJ_G0025098__Arhgap19	119.974	0.90727	0.374649	2.42165	0.0154502	0.180052
MGP_BALBcJ_G0018096__NA	763.973	0.282475	0.116711	2.42031	0.0155074	0.180585
MGP_BALBcJ_G0001062__NA	36.4112	-0.752644	0.311174	-2.41873	0.0155749	0.181239
MGP_BALBcJ_G0021560__Naa16	406.616	-0.285561	0.118098	-2.41799	0.0156064	0.181338
MGP_BALBcJ_G0033885__NA	514.597	-0.411388	0.170135	-2.41801	0.0156055	0.181338
MGP_BALBcJ_G0020483__Fgd3	2385.57	-0.452163	0.187047	-2.41738	0.0156326	0.18151
MGP_BALBcJ_G0022120__Tcf20	2228.5	-0.258535	0.107016	-2.41585	0.0156986	0.182143
MGP_BALBcJ_G0028356__Tnc	5775.39	-0.859934	0.356104	-2.41484	0.0157421	0.182514
MGP_BALBcJ_G0016588__Zbtb37	697.792	-0.264746	0.10971	-2.41315	0.0158151	0.182959
MGP_BALBcJ_G0018805__Dusp14	114.122	-0.677478	0.280727	-2.4133	0.015809	0.182959
MGP_BALBcJ_G0028753__Stk40	3770.12	-0.379331	0.15718	-2.41336	0.0158062	0.182959
MGP_BALBcJ_G0032884__Smg1	3239.34	-0.341977	0.141765	-2.41228	0.015853	0.183146
MGP_BALBcJ_G0036384__NA	1422.36	-0.584391	0.24226	-2.41225	0.0158544	0.183146
MGP_BALBcJ_G0023149__Spaca6	2389.01	-0.371413	0.15405	-2.41098	0.0159097	0.183651
MGP_BALBcJ_G0029776__Ptpn13	263.376	0.432957	0.179628	2.4103	0.0159394	0.18386
MGP_BALBcJ_G0006333__4930555A03Rik	8.54306	1.73676	0.720999	2.40882	0.0160041	0.184009
MGP_BALBcJ_G0019819__Rdh12	40.1628	1.65738	0.688166	2.40841	0.0160223	0.184009
MGP_BALBcJ_G0020404__Fam217a	7.45528	1.77397	0.73652	2.40858	0.0160147	0.184009
MGP_BALBcJ_G0027376__Ssr2	3499.93	0.28699	0.119132	2.40901	0.0159958	0.184009
MGP_BALBcJ_G0027422__Atp8b2	681.264	0.432976	0.179776	2.40842	0.0160219	0.184009
MGP_BALBcJ_G0032594__Stim1	732.539	0.229818	0.0953751	2.40963	0.0159689	0.184009
MGP_BALBcJ_G0034957__Lactb	433.404	0.256505	0.106515	2.40815	0.0160336	0.184009
MGP_BALBcJ_G0020737__Arrdc3	5454.18	0.461908	0.191962	2.40625	0.0161173	0.184836
MGP_BALBcJ_G0023277__Zfp598	2067.41	-0.203817	0.0847506	-2.4049	0.0161768	0.185385
MGP_BALBcJ_G0027022__Pkia	200.337	-0.430536	0.179248	-2.4019	0.0163103	0.186779
MGP_BALBcJ_G0030140__Limk1	275.493	0.395272	0.164598	2.40144	0.0163306	0.186876
MGP_BALBcJ_G0023437__Zfand3	1786.74	0.185332	0.0772055	2.40051	0.0163723	0.187218
MGP_BALBcJ_G0010061__NA	24.415	-1.00507	0.418797	-2.39991	0.0163992	0.187391
MGP_BALBcJ_G0031949__Lgals4	599.373	-0.350152	0.145922	-2.39959	0.0164135	0.187419
MGP_BALBcJ_G0017432__Dazap1	1396.75	-0.186398	0.0776945	-2.39912	0.0164347	0.187526
MGP_BALBcJ_G0033778__Tmem184c	980.311	0.200234	0.0834975	2.39809	0.0164809	0.187918
MGP_BALBcJ_G0035777__Bgn	5796.79	0.787185	0.328406	2.39699	0.0165305	0.188348
MGP_BALBcJ_G0015852__NA	46.3448	0.930685	0.38838	2.39633	0.0165604	0.188418
MGP_BALBcJ_G0021294__Efs	327.27	-0.444159	0.185344	-2.39641	0.0165567	0.188418
MGP_BALBcJ_G0027304__Fgg	33.4061	-1.56515	0.653413	-2.39535	0.0166046	0.188785
MGP_BALBcJ_G0022716__Lrch3	1271.75	-0.204982	0.0856025	-2.39459	0.0166392	0.189042
MGP_BALBcJ_G0005580__1700001L05Rik	285.976	-0.76306	0.318782	-2.39367	0.0166807	0.18912
MGP_BALBcJ_G0025297__Nudt5	791.222	0.233968	0.0977454	2.39365	0.0166818	0.18912
MGP_BALBcJ_G0030807__NA	1139.78	-0.238755	0.0997439	-2.39368	0.0166802	0.18912
MGP_BALBcJ_G0017585__Ikbip	287.59	0.474331	0.198291	2.3921	0.0167524	0.189598
MGP_BALBcJ_G0021690__Rad1	175.875	-0.392429	0.164081	-2.39167	0.0167718	0.189598
MGP_BALBcJ_G0023427__NA	274.109	0.750583	0.313831	2.39168	0.0167716	0.189598
MGP_BALBcJ_G0034749__Plet1	28124.7	0.418148	0.174803	2.39211	0.016752	0.189598
MGP_BALBcJ_G0019165__Tmem101	308.332	0.28597	0.119593	2.39118	0.0167942	0.189716
MGP_BALBcJ_G0021095__Ogdhl	20.1625	1.22978	0.514406	2.39068	0.0168173	0.189841
MGP_BALBcJ_G0018161__Zfp62	1168.17	-0.250372	0.104745	-2.3903	0.0168346	0.189901
MGP_BALBcJ_G0017330__Col18a1	826.49	0.568128	0.237812	2.38897	0.0168955	0.190318
MGP_BALBcJ_G0029543__Tbc1d1	1101.83	0.428425	0.179315	2.38923	0.0168839	0.190318
MGP_BALBcJ_G0031035__Nr2c2	1672.3	-0.334793	0.140191	-2.38812	0.0169349	0.190626
MGP_BALBcJ_G0005060__Gm21781	696.099	-0.278702	0.116723	-2.38773	0.0169526	0.190689
MGP_BALBcJ_G0022029__Ankrd54	431.789	-0.295601	0.123868	-2.38643	0.0170131	0.191234
MGP_BALBcJ_G0017546__Prdm4	1047.16	-0.347057	0.145462	-2.38589	0.0170378	0.191258
MGP_BALBcJ_G0029445__Mfsd10	1319.78	-0.234397	0.0982442	-2.38586	0.0170393	0.191258
MGP_BALBcJ_G0039853__NA	14.0514	1.18692	0.497723	2.38469	0.0170936	0.191731
MGP_BALBcJ_G0015779__Ncoa2	2554.33	-0.254451	0.106733	-2.38399	0.0171259	0.191958
MGP_BALBcJ_G0018861__Vezf1	1671.25	-0.254309	0.106711	-2.38316	0.0171646	0.192256
MGP_BALBcJ_G0034506__Pus3	181.224	-0.37918	0.159177	-2.38213	0.017213	0.192661
MGP_BALBcJ_G0033950__Adgrg5	198.224	0.762104	0.319986	2.38168	0.017234	0.19276
MGP_BALBcJ_G0033324__Arglu1	1466.46	-0.207323	0.0870821	-2.38078	0.017276	0.193094
MGP_BALBcJ_G0024505__Tcf4	1611.28	0.317156	0.133279	2.37965	0.0173292	0.193552
MGP_BALBcJ_G0021596__Slain1	131.555	-0.526374	0.221327	-2.37826	0.0173944	0.193834
MGP_BALBcJ_G0024306__Pcdhga5	76.2568	0.701231	0.294874	2.37807	0.0174034	0.193834
MGP_BALBcJ_G0030356__Rnf6	1460.24	-0.190237	0.0799769	-2.37864	0.0173764	0.193834
MGP_BALBcJ_G0033713__Rpl18a	8502.49	-0.132135	0.0555546	-2.37846	0.017385	0.193834
MGP_BALBcJ_G0003501__Gm13381	12.2839	-1.87735	0.789547	-2.37776	0.0174183	0.193864
MGP_BALBcJ_G0000080__Ighv1-9	259.47	1.02582	0.431479	2.37744	0.0174332	0.193894
MGP_BALBcJ_G0027158__Jade1	2569.48	-0.233055	0.0980771	-2.37625	0.0174898	0.194387
MGP_BALBcJ_G0016201__Gigyf2	2622.56	-0.183402	0.0772289	-2.37478	0.0175592	0.194476
MGP_BALBcJ_G0017746__Os9	6614.27	0.164622	0.0693112	2.37511	0.0175438	0.194476
MGP_BALBcJ_G0017821__Mmp19	784.368	0.827035	0.348231	2.37496	0.0175507	0.194476
MGP_BALBcJ_G0022760__Iqcb1	242.541	-0.316619	0.133303	-2.37518	0.0175405	0.194476
MGP_BALBcJ_G0024968__Tjp2	3466.93	-0.295264	0.124293	-2.37556	0.0175225	0.194476
MGP_BALBcJ_G0024401__Ppic	530.323	0.703404	0.296364	2.37344	0.0176231	0.195048
MGP_BALBcJ_G0020969__Thrb	527.033	-0.314898	0.132702	-2.37297	0.0176457	0.195162
MGP_BALBcJ_G0018417__Map2k4	1827.77	0.240992	0.101572	2.37261	0.0176627	0.195214
MGP_BALBcJ_G0030308__Rbak	419.73	-0.312551	0.131752	-2.37228	0.0176788	0.195256
MGP_BALBcJ_G0017716__Msrb3	824.207	0.398394	0.168006	2.37131	0.017725	0.195342
MGP_BALBcJ_G0018813__Ggnbp2	2379.55	-0.248693	0.104886	-2.37109	0.0177359	0.195342
MGP_BALBcJ_G0026585__Nxt1	215.113	-0.376246	0.158649	-2.37157	0.0177129	0.195342
MGP_BALBcJ_G0027507__Rptn	10.9504	7.6046	3.20633	2.37175	0.0177041	0.195342
MGP_BALBcJ_G0024492__Spire1	265.856	0.367973	0.155218	2.37069	0.0177549	0.19539
MGP_BALBcJ_G0032735__Fam160a2	2677.72	-0.567473	0.239391	-2.37048	0.017765	0.19539
MGP_BALBcJ_G0027450__S100a6	1909.43	0.526528	0.222179	2.36984	0.017796	0.195435
MGP_BALBcJ_G0033440__Gins4	485.209	-0.31672	0.133658	-2.36963	0.0178061	0.195435
MGP_BALBcJ_G0034313__Ccdc82	267.399	-0.45222	0.190818	-2.36989	0.0177932	0.195435
MGP_BALBcJ_G0022160__Cdpf1	244.03	0.322728	0.136285	2.36803	0.0178832	0.195898
MGP_BALBcJ_G0027562__Adamtsl4	368.102	0.315146	0.133064	2.36837	0.0178667	0.195898
MGP_BALBcJ_G0032547__Pold3	1112.72	-0.266284	0.112452	-2.36798	0.0178854	0.195898
MGP_BALBcJ_G0029413__Yes1	1892.32	-0.24527	0.103604	-2.36737	0.0179148	0.196085
MGP_BALBcJ_G0016994__Myb	34.6178	0.836124	0.353297	2.36663	0.017951	0.196346
MGP_BALBcJ_G0022043__Kdelr3	264.413	0.453266	0.191561	2.36617	0.0179734	0.196455
MGP_BALBcJ_G0011027__NA	40.4073	2.03639	0.86087	2.3655	0.0180058	0.196615
MGP_BALBcJ_G0025683__Scai	523.516	-0.349086	0.147583	-2.36535	0.0180129	0.196615
MGP_BALBcJ_G0025386__Arrdc1	2022.98	-0.425101	0.179746	-2.36501	0.0180296	0.196663
MGP_BALBcJ_G0030912__Actg2	265.523	0.713448	0.301795	2.36401	0.0180781	0.197057
MGP_BALBcJ_G0032360__Chd2	2124.57	-0.267245	0.113083	-2.36328	0.0181141	0.197313
MGP_BALBcJ_G0033384__Mcph1	193.119	0.411318	0.174136	2.36204	0.0181744	0.197834
MGP_BALBcJ_G0020120__Esyt2	3857.75	-0.421721	0.178608	-2.36115	0.0182185	0.198047
MGP_BALBcJ_G0032526__Emsy	1344.21	-0.276265	0.117005	-2.36114	0.018219	0.198047
MGP_BALBcJ_G0024515__Smad4	2043.31	-0.445078	0.188543	-2.36062	0.0182443	0.198186
MGP_BALBcJ_G0002300__NA	29.5386	-0.883263	0.37425	-2.36009	0.0182704	0.198199
MGP_BALBcJ_G0025177__Cuedc2	576.993	0.319182	0.135227	2.36034	0.0182584	0.198199
MGP_BALBcJ_G0015557__Gm20488	158.931	0.605262	0.256487	2.35982	0.018284	0.19821
MGP_BALBcJ_G0026309__Gm14137	27.837	0.913689	0.387308	2.35908	0.0183204	0.198469
MGP_BALBcJ_G0027576__Mtmr11	149.502	0.453912	0.192456	2.35852	0.0183481	0.198633
MGP_BALBcJ_G0007282__Gm17491	366.077	-0.322573	0.136828	-2.35751	0.0183982	0.199039
MGP_BALBcJ_G0025866__Fam171b	23.6278	1.1441	0.485486	2.35661	0.0184428	0.199386
MGP_BALBcJ_G0023253__Pdpk1	2465.9	-0.25176	0.106854	-2.3561	0.0184678	0.19952
MGP_BALBcJ_G0030335__Baiap2l1	458.119	-0.452916	0.192265	-2.35568	0.0184886	0.199609
MGP_BALBcJ_G0026495__Adam33	100.24	0.781369	0.331907	2.35418	0.0185636	0.200075
MGP_BALBcJ_G0026600__Zfp120	650.316	-0.278467	0.118292	-2.35406	0.0185697	0.200075
MGP_BALBcJ_G0033638__Sh2d4a	102.946	-0.710705	0.301885	-2.35422	0.0185616	0.200075
MGP_BALBcJ_G0027753__Taf13	534.117	0.283083	0.120293	2.35328	0.0186088	0.20036
MGP_BALBcJ_G0025201__Obfc1	179.447	0.447527	0.190225	2.35261	0.0186421	0.200583
MGP_BALBcJ_G0017743__Cdk4	2864.74	0.306968	0.130494	2.35235	0.0186555	0.20059
MGP_BALBcJ_G0025730__39142	2778.75	-0.317527	0.135007	-2.35192	0.0186768	0.200683
MGP_BALBcJ_G0032880__Nucb2	5569.08	-0.65612	0.279045	-2.35131	0.0187076	0.200878
MGP_BALBcJ_G0023755__Hsp90ab1	35553.7	0.238085	0.101285	2.35064	0.0187413	0.200968
MGP_BALBcJ_G0027896__Adh7	60.2919	0.814338	0.346402	2.35085	0.0187307	0.200968
MGP_BALBcJ_G0019015__Msl1	2661.71	-0.154545	0.0657595	-2.35015	0.0187657	0.201094
MGP_BALBcJ_G0005748__Epb41l4aos	105.084	-0.438559	0.18666	-2.3495	0.0187984	0.201172
MGP_BALBcJ_G0023035__Chaf1b	269.186	0.51597	0.219601	2.34958	0.0187947	0.201172
MGP_BALBcJ_G0007343__Gm21817	62.8673	-0.704732	0.300091	-2.34839	0.0188546	0.20123
MGP_BALBcJ_G0023125__NA	1885.55	-0.183671	0.0782001	-2.34873	0.0188378	0.20123
MGP_BALBcJ_G0027976__NA	18.8869	1.91773	0.816439	2.3489	0.0188292	0.20123
MGP_BALBcJ_G0029431__Whsc1	1909.64	-0.26246	0.111761	-2.34841	0.0188538	0.20123
MGP_BALBcJ_G0024503__Mc2r	53.5865	-0.801674	0.341528	-2.34732	0.018909	0.201675
MGP_BALBcJ_G0005378__Mirg	18.8946	1.27297	0.542483	2.34657	0.0189472	0.201678
MGP_BALBcJ_G0027653__Vangl1	504.994	-0.345501	0.147207	-2.34705	0.0189226	0.201678
MGP_BALBcJ_G0032259__Saa3	833.555	-0.926868	0.39499	-2.34656	0.0189475	0.201678
MGP_BALBcJ_G0023147__Lnpep	1452.98	-0.405068	0.172754	-2.34476	0.0190393	0.202248
MGP_BALBcJ_G0026130__Dgkz	5410.38	-0.427071	0.182111	-2.34512	0.0190211	0.202248
MGP_BALBcJ_G0026856__Pltp	1250.3	0.520407	0.221938	2.34483	0.0190356	0.202248
MGP_BALBcJ_G0022490__Tnfrsf17	20.4381	1.24613	0.531657	2.34386	0.0190855	0.202467
MGP_BALBcJ_G0029082__Dhrs3	2508.4	-0.575377	0.245478	-2.34391	0.0190828	0.202467
MGP_BALBcJ_G0025822__Hoxd8	171.357	0.468074	0.199747	2.34334	0.0191121	0.202613
MGP_BALBcJ_G0027525__Tuft1	442.722	-0.252571	0.107795	-2.34307	0.0191258	0.202624
MGP_BALBcJ_G0019337__Gga3	904.605	-0.272604	0.116388	-2.34219	0.0191707	0.202792
MGP_BALBcJ_G0023948__Themis3	31.2631	1.43146	0.611208	2.34201	0.0191801	0.202792
MGP_BALBcJ_G0026917__Fam210b	1695.19	0.299657	0.127931	2.34234	0.0191634	0.202792
MGP_BALBcJ_G0018692__Taok1	772.039	-0.433516	0.185162	-2.34127	0.0192181	0.202923
MGP_BALBcJ_G0023652__Rnf39	132.729	-0.74971	0.320204	-2.34135	0.0192143	0.202923
MGP_BALBcJ_G0022813__Ccdc80	1971.46	1.11225	0.475222	2.34047	0.0192593	0.203223
MGP_BALBcJ_G0000003__Igha	43702.7	0.494945	0.211689	2.33807	0.0193834	0.20335
MGP_BALBcJ_G0016831__Trp53bp2	2688.91	-0.370845	0.158616	-2.33801	0.0193868	0.20335
MGP_BALBcJ_G0016935__Ginm1	1604.12	-0.177833	0.07604	-2.33868	0.0193521	0.20335
MGP_BALBcJ_G0018534__Arrb2	746.163	0.483378	0.206651	2.3391	0.0193304	0.20335
MGP_BALBcJ_G0023520__Rxrb	1043.01	-0.209426	0.0895522	-2.33859	0.0193567	0.20335
MGP_BALBcJ_G0027299__Gucy1a3	206.214	0.45664	0.195178	2.33961	0.0193041	0.20335
MGP_BALBcJ_G0030500__Hilpda	492.452	0.805247	0.344218	2.33935	0.0193172	0.20335
MGP_BALBcJ_G0034050__Esrp2	1962.74	-0.367338	0.157092	-2.33837	0.0193682	0.20335
MGP_BALBcJ_G0035942__Cited1	18.006	-1.59243	0.680779	-2.33912	0.0193291	0.20335
MGP_BALBcJ_G0028139__Rpp25l	272.474	-0.374379	0.160149	-2.33768	0.0194036	0.203391
MGP_BALBcJ_G0016481__5730559C18Rik	378.209	-0.748587	0.320345	-2.33681	0.0194488	0.203649
MGP_BALBcJ_G0021981__Zfp7	775.429	-0.360369	0.15422	-2.33672	0.0194539	0.203649
MGP_BALBcJ_G0019261__Pitpnc1	1795.5	0.191348	0.0819086	2.33611	0.0194853	0.203765
MGP_BALBcJ_G0028010__Chd7	1663.31	-0.380026	0.162682	-2.33601	0.0194907	0.203765
MGP_BALBcJ_G0016970__Abracl	628.726	0.295389	0.126497	2.33514	0.0195359	0.203871
MGP_BALBcJ_G0020978__Gng2	289.224	0.538213	0.230452	2.33547	0.0195188	0.203871
MGP_BALBcJ_G0031625__Zfp606	421.64	-0.290902	0.124579	-2.33508	0.0195394	0.203871
MGP_BALBcJ_G0016522__Swt1	456.5	-0.299997	0.128517	-2.3343	0.0195802	0.204162
MGP_BALBcJ_G0019423__Sgsh	1026.79	0.226001	0.0968333	2.33392	0.0195999	0.204234
MGP_BALBcJ_G0028286__Klf4	428.198	0.451435	0.193464	2.33343	0.0196257	0.204368
MGP_BALBcJ_G0019284__Abca9	680.55	0.764751	0.327782	2.33311	0.0196425	0.204408
MGP_BALBcJ_G0022428__Crebbp	2084.98	-0.206095	0.0884296	-2.33062	0.0197736	0.205099
MGP_BALBcJ_G0025366__Pdss1	94.0525	-0.445572	0.191135	-2.33118	0.0197437	0.205099
MGP_BALBcJ_G0026406__Shc4	115.274	0.735846	0.315713	2.33074	0.019767	0.205099
MGP_BALBcJ_G0027300__Map9	78.0583	0.902947	0.387394	2.33082	0.0197629	0.205099
MGP_BALBcJ_G0028705__Rlf	861.388	-0.36808	0.157898	-2.33113	0.0197467	0.205099
MGP_BALBcJ_G0026909__Zfp217	1228.67	-0.288159	0.123695	-2.32959	0.0198276	0.205395
MGP_BALBcJ_G0030146__Cldn3	2958.48	-0.550604	0.236353	-2.32959	0.019828	0.205395
MGP_BALBcJ_G0024252__Tmco6	248.765	-0.322256	0.138354	-2.32921	0.0198479	0.205429
MGP_BALBcJ_G0031262__Lpar5	20.5219	1.24517	0.53463	2.32903	0.0198573	0.205429
MGP_BALBcJ_G0030659__Arhgef5	4130.91	-0.233775	0.100388	-2.32872	0.0198738	0.205466
MGP_BALBcJ_G0034703__Scn2b	23.2243	0.899209	0.386197	2.32837	0.0198925	0.205525
MGP_BALBcJ_G0015540__N4bp2os	48.7005	-0.65529	0.281587	-2.32713	0.0199584	0.205779
MGP_BALBcJ_G0025213__Xpnpep1	2656.21	0.162872	0.0699776	2.32748	0.0199396	0.205779
MGP_BALBcJ_G0026608__Pygb	2444.68	-0.379318	0.163012	-2.32693	0.0199689	0.205779
MGP_BALBcJ_G0034486__Aplp2	8786.93	0.214625	0.0922212	2.32728	0.0199501	0.205779
MGP_BALBcJ_G0026126__Harbi1	462.941	-0.338038	0.145297	-2.32653	0.0199902	0.205864
MGP_BALBcJ_G0032350__Lrrc28	246.996	0.289349	0.124401	2.32594	0.0200217	0.206055
MGP_BALBcJ_G0002092__NA	34.5936	-0.798504	0.343521	-2.32447	0.0201003	0.206729
MGP_BALBcJ_G0029742__Anxa3	1335.93	0.788093	0.339137	2.32382	0.0201353	0.206821
MGP_BALBcJ_G0033932__Mt1	7853.1	0.486065	0.20916	2.32389	0.0201312	0.206821
MGP_BALBcJ_G0033503__Gtf2e2	600.384	0.211357	0.0909634	2.32354	0.0201502	0.20684
MGP_BALBcJ_G0023928__Efna5	926.906	-0.600072	0.258298	-2.32318	0.0201695	0.206876
MGP_BALBcJ_G0034535__Msantd2	329.899	-0.292347	0.125849	-2.32299	0.0201798	0.206876
MGP_BALBcJ_G0032909__Lyrm1	73.4905	-0.535774	0.230676	-2.32263	0.0201991	0.20694
MGP_BALBcJ_G0025587__St6galnac4	596.272	0.605261	0.260697	2.32171	0.0202488	0.207315
MGP_BALBcJ_G0029917__Trpv4	149.314	0.529225	0.22799	2.32127	0.0202723	0.207422
MGP_BALBcJ_G0032429__Tm6sf1	474.554	0.619653	0.267242	2.3187	0.0204113	0.208709
MGP_BALBcJ_G0021816__Nov	22.4486	-1.08838	0.469653	-2.31741	0.0204813	0.209085
MGP_BALBcJ_G0023976__Lbh	488.707	0.69277	0.298907	2.31768	0.0204668	0.209085
MGP_BALBcJ_G0028640__Atp6v0b	3960.03	0.282265	0.121808	2.31729	0.0204877	0.209085
MGP_BALBcJ_G0024806__Fads1	5790.97	-0.368526	0.159157	-2.31549	0.0205864	0.209453
MGP_BALBcJ_G0024859__Mrpl16	428.604	0.282268	0.121908	2.31542	0.0205898	0.209453
MGP_BALBcJ_G0025222__Bbip1	326.677	-0.356073	0.153769	-2.31563	0.0205783	0.209453
MGP_BALBcJ_G0026779__NA	14.4293	1.32215	0.570915	2.31584	0.0205668	0.209453
MGP_BALBcJ_G0026871__Slc2a10	48.4025	0.695271	0.300187	2.31612	0.0205515	0.209453
MGP_BALBcJ_G0026135__Pex16	627.243	-0.239681	0.103566	-2.31427	0.0206526	0.209958
MGP_BALBcJ_G0019976__Itpk1	1668.35	0.38676	0.167202	2.31313	0.0207153	0.210129
MGP_BALBcJ_G0021788__Oxr1	2000.3	-0.244982	0.105896	-2.31342	0.0206998	0.210129
MGP_BALBcJ_G0023613__Flot1	1808.36	-0.427547	0.184847	-2.31298	0.020724	0.210129
MGP_BALBcJ_G0026375__Ctdspl2	548.91	-0.296304	0.128117	-2.31276	0.0207358	0.210129
MGP_BALBcJ_G0030383__Alox5ap	337.09	0.782535	0.338289	2.31322	0.0207107	0.210129
MGP_BALBcJ_G0030132__Ncf1	477.572	0.693804	0.300123	2.31173	0.0207924	0.210568
MGP_BALBcJ_G0033338__Ankrd10	714.442	-0.257068	0.111224	-2.31126	0.0208182	0.210695
MGP_BALBcJ_G0019926__Snw1	2113.49	-0.189673	0.0820758	-2.31094	0.020836	0.21074
MGP_BALBcJ_G0022126__A4galt	150.02	0.647706	0.280349	2.31036	0.0208683	0.210798
MGP_BALBcJ_G0025313__Itih5	997.195	0.629744	0.272556	2.31051	0.0208598	0.210798
MGP_BALBcJ_G0018818__NA	1455.83	-0.246844	0.106876	-2.30964	0.0209081	0.210931
MGP_BALBcJ_G0023947__Rab12	938.447	0.167986	0.0727312	2.30968	0.020906	0.210931
MGP_BALBcJ_G0004471__Gm31749	7.20578	-2.0002	0.866641	-2.30799	0.0209998	0.211721
MGP_BALBcJ_G0035588__Lonrf3	57.5366	-0.991588	0.429763	-2.30729	0.0210388	0.21198
MGP_BALBcJ_G0019089__Krt17	877.627	0.805738	0.34949	2.30547	0.0211404	0.212463
MGP_BALBcJ_G0022226__Twf1	3336.29	0.121716	0.0527802	2.3061	0.0211053	0.212463
MGP_BALBcJ_G0024242__Cystm1	569.134	0.31015	0.134527	2.30548	0.0211396	0.212463
MGP_BALBcJ_G0025600__Fam129b	6178.2	-0.356896	0.154786	-2.30573	0.0211255	0.212463
MGP_BALBcJ_G0028206__Glipr2	379.668	-0.590343	0.25611	-2.30503	0.0211647	0.212573
MGP_BALBcJ_G0019113__Stat5b	2509.94	0.236668	0.102746	2.30342	0.0212552	0.213346
MGP_BALBcJ_G0030664__Ezh2	734.005	-0.416427	0.18084	-2.30274	0.0212936	0.213596
MGP_BALBcJ_G0018637__Pafah1b1	4783.6	-0.14997	0.0651771	-2.30097	0.0213935	0.214057
MGP_BALBcJ_G0020622__Ptch1	764.59	-0.401033	0.174253	-2.30143	0.0213671	0.214057
MGP_BALBcJ_G0028552__Ttc39a	2496.1	-0.389843	0.169377	-2.30162	0.0213564	0.214057
MGP_BALBcJ_G0033490__Tti2	333.937	-0.310286	0.134842	-2.30111	0.0213857	0.214057
MGP_BALBcJ_G0035179__Ackr4	109.267	0.886718	0.385416	2.30068	0.0214097	0.214084
MGP_BALBcJ_G0024771__Slc3a2	18469.2	-0.471769	0.205124	-2.29992	0.0214527	0.214108
MGP_BALBcJ_G0025001__Ermp1	1302.35	0.209371	0.0910288	2.30006	0.021445	0.214108
MGP_BALBcJ_G0027202__Wwtr1	2922.88	-0.193443	0.0840978	-2.30022	0.0214359	0.214108
MGP_BALBcJ_G0033282__Insr	4269.74	-0.241969	0.105265	-2.29866	0.021524	0.214684
MGP_BALBcJ_G0022573__Dgcr8	786.615	-0.317563	0.138379	-2.29488	0.0217399	0.216702
MGP_BALBcJ_G0022429__Adcy9	1214.95	0.340688	0.14854	2.29358	0.0218144	0.217308
MGP_BALBcJ_G0016127__Chpf	938.296	0.187456	0.0817426	2.29325	0.0218338	0.217364
MGP_BALBcJ_G0021582__Klf5	319.937	-0.306782	0.133826	-2.29239	0.0218832	0.217523
MGP_BALBcJ_G0033477__Adgra2	288.127	0.860516	0.375387	2.29234	0.0218858	0.217523
MGP_BALBcJ_G0036123__Pak3	75.7452	0.729287	0.318152	2.29226	0.0218909	0.217523
MGP_BALBcJ_G0004648__4930524O07Rik	18.8422	-1.02364	0.446788	-2.29112	0.0219565	0.218038
MGP_BALBcJ_G0024538__Pias2	1607.34	-0.210533	0.0919062	-2.29074	0.0219786	0.21812
MGP_BALBcJ_G0027860__Papss1	2264.04	-0.220459	0.0962984	-2.28933	0.0220599	0.218699
MGP_BALBcJ_G0032394__Sema4b	1443.83	0.374046	0.163392	2.28926	0.0220645	0.218699
MGP_BALBcJ_G0028345__Orm1	3151.35	-0.610756	0.266864	-2.28864	0.0221004	0.218868
MGP_BALBcJ_G0034716__Tagln	4268.04	0.517869	0.226293	2.28849	0.0221091	0.218868
MGP_BALBcJ_G0025125__Slc25a28	896.548	-0.244954	0.10707	-2.2878	0.0221495	0.219003
MGP_BALBcJ_G0033520__6430573F11Rik	122.829	0.647033	0.282821	2.28778	0.0221504	0.219003
MGP_BALBcJ_G0026384__Duox2	24.8401	1.63381	0.714407	2.28695	0.0221987	0.219343
MGP_BALBcJ_G0028134__Fam219a	476.655	-0.313241	0.137014	-2.28621	0.0222422	0.219637
MGP_BALBcJ_G0006687__5430416N02Rik	151.388	-0.44266	0.193739	-2.28483	0.0223231	0.220193
MGP_BALBcJ_G0019576__Rrm2	92.4432	0.674424	0.295205	2.2846	0.0223364	0.220193
MGP_BALBcJ_G0033494__Nrg1	36.6505	1.06872	0.467806	2.28453	0.0223402	0.220193
MGP_BALBcJ_G0022337__Krt7	1360.36	-0.673279	0.294759	-2.28417	0.0223618	0.220268
MGP_BALBcJ_G0015422__5430405H02Rik	126.055	-0.435436	0.190799	-2.28217	0.0224793	0.221151
MGP_BALBcJ_G0029083__Vps13d	2347.53	-0.169087	0.0740887	-2.28222	0.0224762	0.221151
MGP_BALBcJ_G0018111__Atp10b	644.824	-0.70151	0.307737	-2.27958	0.0226327	0.222522
MGP_BALBcJ_G0025566__Lamc3	161.328	0.960734	0.421522	2.2792	0.022655	0.222603
MGP_BALBcJ_G0034153__Hsbp1	2226.93	0.174857	0.0767272	2.27894	0.0226707	0.222619
MGP_BALBcJ_G0019895__Zc2hc1c	66.682	-0.75104	0.329629	-2.27844	0.0227003	0.222772
MGP_BALBcJ_G0017751__Pip4k2c	3515.81	0.20742	0.0910826	2.27727	0.0227701	0.223181
MGP_BALBcJ_G0032533__Serpinh1	3661.82	0.737709	0.323925	2.2774	0.0227621	0.223181
MGP_BALBcJ_G0035542__Ddx3x	13672.9	-0.279869	0.122943	-2.27642	0.0228211	0.223543
MGP_BALBcJ_G0016988__Map7	2453.38	-0.208306	0.0915288	-2.27585	0.0228548	0.223734
MGP_BALBcJ_G0036891__B930095G15Rik	409.711	-0.403055	0.177204	-2.27453	0.0229343	0.224374
MGP_BALBcJ_G0021366__Gjb2	8274.88	-0.501448	0.22051	-2.27404	0.0229635	0.224521
MGP_BALBcJ_G0022844__Cblb	860.227	-0.386567	0.17006	-2.27312	0.023019	0.224647
MGP_BALBcJ_G0024002__Eif2ak2	1541.57	0.1712	0.0753074	2.27335	0.0230049	0.224647
MGP_BALBcJ_G0034323__Amotl1	1614.62	-0.295661	0.130048	-2.27347	0.0229976	0.224647
MGP_BALBcJ_G0020852__Erbin	7494.99	-0.299397	0.131736	-2.2727	0.0230444	0.224757
MGP_BALBcJ_G0017015__Vnn1	18.0999	1.10046	0.484306	2.27225	0.0230715	0.224883
MGP_BALBcJ_G0028546__Kti12	301.909	-0.364868	0.160613	-2.27173	0.0231028	0.22505
MGP_BALBcJ_G0031433__Pde3a	109.9	0.503163	0.22171	2.26947	0.02324	0.226247
MGP_BALBcJ_G0024848__Ms4a6c	662.551	0.736265	0.324642	2.26793	0.0233336	0.226552
MGP_BALBcJ_G0027552__Anxa9	94.7585	0.715182	0.315367	2.26778	0.0233428	0.226552
MGP_BALBcJ_G0027771__Col11a1	65.6577	1.0977	0.484005	2.26795	0.0233325	0.226552
MGP_BALBcJ_G0029709__Mthfd2l	321.744	-0.362205	0.159661	-2.26859	0.0232931	0.226552
MGP_BALBcJ_G0034945__Snx1	2370.83	0.201684	0.0889092	2.26843	0.0233031	0.226552
MGP_BALBcJ_G0033524__Tusc3	566.55	0.234131	0.103299	2.26653	0.0234187	0.22715
MGP_BALBcJ_G0022382__Map3k12	302.83	0.424781	0.187529	2.26515	0.0235036	0.227834
MGP_BALBcJ_G0022851__Zbtb11	751.467	-0.274655	0.121326	-2.26377	0.0235882	0.228515
MGP_BALBcJ_G0032208__Snrnp70	8510.5	-0.123137	0.0544014	-2.26349	0.0236055	0.228542
MGP_BALBcJ_G0016527__1700025G04Rik	4095.72	-0.215793	0.0954621	-2.26051	0.0237895	0.228812
MGP_BALBcJ_G0019613__Pik3cg	239.057	0.708102	0.313154	2.26119	0.0237472	0.228812
MGP_BALBcJ_G0020099__Cep170b	4643.9	-0.316916	0.140112	-2.26187	0.0237052	0.228812
MGP_BALBcJ_G0022057__Cbx7	771.402	-0.529229	0.234115	-2.26055	0.023787	0.228812
MGP_BALBcJ_G0024627__Adrbk1	3448.31	-0.214737	0.0949796	-2.26087	0.0237671	0.228812
MGP_BALBcJ_G0027402__Efna1	1350	-0.280764	0.124144	-2.2616	0.0237221	0.228812
MGP_BALBcJ_G0027865__Npnt	294.439	0.633769	0.280085	2.26277	0.0236498	0.228812
MGP_BALBcJ_G0033471__Hook3	3332.97	-0.30358	0.134275	-2.26088	0.0237666	0.228812
MGP_BALBcJ_G0034734__Rbm7	1182.87	-0.208344	0.0921686	-2.26047	0.0237922	0.228812
MGP_BALBcJ_G0035155__Msl2	1371.72	-0.221509	0.0979211	-2.26212	0.0236903	0.228812
MGP_BALBcJ_G0036028__Pcdh19	182.261	0.466941	0.206414	2.26215	0.0236879	0.228812
MGP_BALBcJ_G0024403__Cep120	1096.01	-0.336892	0.149075	-2.25988	0.0238289	0.229026
MGP_BALBcJ_G0033200__Rassf7	581.129	-0.463769	0.205267	-2.25935	0.0238617	0.229202
MGP_BALBcJ_G0028213__Zcchc7	1210.71	-0.310709	0.137584	-2.25832	0.0239259	0.22968
MGP_BALBcJ_G0019752__Arid4a	1073.46	-0.232538	0.102996	-2.25774	0.0239617	0.229811
MGP_BALBcJ_G0019973__Lgmn	4415.28	0.517753	0.229334	2.25763	0.0239685	0.229811
MGP_BALBcJ_G0016046__Idh1	2066.36	0.301869	0.133725	2.25738	0.0239844	0.229824
MGP_BALBcJ_G0020380__Serpinb6b	111.873	0.810396	0.359066	2.25695	0.024011	0.22994
MGP_BALBcJ_G0017934__Ap1b1	2620.58	0.264436	0.11725	2.25532	0.0241131	0.230778
MGP_BALBcJ_G0029290__Ptpn12	1656.46	-0.381186	0.169097	-2.25424	0.0241811	0.231289
MGP_BALBcJ_G0035065__Pgm3	610.074	0.358472	0.159104	2.25307	0.024255	0.231856
MGP_BALBcJ_G0019964__Smek1	1934.45	-0.237644	0.105542	-2.25166	0.0243437	0.232564
MGP_BALBcJ_G0029918__Gltp	332.797	0.469171	0.208495	2.25027	0.0244315	0.233127
MGP_BALBcJ_G0033280__Mrgprf	48.221	0.678517	0.301527	2.25027	0.024432	0.233127
MGP_BALBcJ_G0004836__Gm29186	69.4091	-0.931441	0.413994	-2.24989	0.0244558	0.233213
MGP_BALBcJ_G0035053__Phip	2139.69	-0.281407	0.125129	-2.24894	0.0245162	0.233648
MGP_BALBcJ_G0030627__Tmem139	216.245	-0.644798	0.286812	-2.24816	0.0245662	0.233984
MGP_BALBcJ_G0003165__A230107N01Rik	18.4941	-1.02309	0.455222	-2.24746	0.0246105	0.234266
MGP_BALBcJ_G0018515__Gabarap	9691.2	0.144838	0.064465	2.24678	0.0246544	0.234542
MGP_BALBcJ_G0018473__Tmem88	67.6262	0.597302	0.26589	2.24642	0.024677	0.234617
MGP_BALBcJ_G0022444__Anks3	850.243	-0.219163	0.0975717	-2.24617	0.024693	0.234628
MGP_BALBcJ_G0027086__Pld1	624.956	0.295048	0.131379	2.24577	0.0247185	0.23473
MGP_BALBcJ_G0017045__Lama2	1438.39	0.475158	0.211666	2.24485	0.0247778	0.235011
MGP_BALBcJ_G0018185__Canx	10850	0.310507	0.138311	2.24498	0.0247691	0.235011
MGP_BALBcJ_G0023569__Hspa1l	31.4456	-0.870627	0.387928	-2.2443	0.0248132	0.235206
MGP_BALBcJ_G0021522__Itm2b	36355	-0.326566	0.145564	-2.24346	0.0248674	0.235579
MGP_BALBcJ_G0029106__Angptl7	31.6607	0.920597	0.41045	2.2429	0.0249035	0.235624
MGP_BALBcJ_G0034286__Pdgfd	394.801	0.468888	0.209059	2.24285	0.0249062	0.235624
MGP_BALBcJ_G0034428__Smarca4	3748.84	0.192925	0.086024	2.24269	0.0249168	0.235624
MGP_BALBcJ_G0010251__NA	35.9049	0.818052	0.364835	2.24225	0.0249451	0.235751
MGP_BALBcJ_G0020968__Rarb	11.9087	1.20798	0.538902	2.24156	0.0249899	0.236034
MGP_BALBcJ_G0019106__Dhx58	304.745	0.325337	0.145221	2.24029	0.0250722	0.23667
MGP_BALBcJ_G0019591__Tssc1	339.24	0.278253	0.124232	2.23979	0.0251047	0.236695
MGP_BALBcJ_G0032985__Ypel3	1981.98	-0.283763	0.126691	-2.23981	0.0251036	0.236695
MGP_BALBcJ_G0029462__Afap1	2455.94	-0.294373	0.131504	-2.23851	0.025188	0.237198
MGP_BALBcJ_G0033269__Shank2	1690.03	-0.480601	0.214694	-2.23854	0.0251859	0.237198
MGP_BALBcJ_G0026359__Trp53bp1	1141.76	0.298405	0.13336	2.23759	0.0252478	0.23762
MGP_BALBcJ_G0034942__Csnk1g1	1092.01	-0.184686	0.082564	-2.23688	0.0252942	0.237915
MGP_BALBcJ_G0026768__Snhg11	845.703	0.627675	0.280636	2.23662	0.0253111	0.237934
MGP_BALBcJ_G0026668__Asxl1	2210.1	-0.265628	0.11878	-2.23629	0.0253326	0.237995
MGP_BALBcJ_G0030296__Foxk1	1486.64	-0.218165	0.0975766	-2.23583	0.0253628	0.238137
MGP_BALBcJ_G0016334__Clasp1	1618.35	-0.243623	0.108981	-2.23547	0.0253863	0.238216
MGP_BALBcJ_G0019186__Gjc1	81.7398	0.474002	0.212096	2.23485	0.0254273	0.238415
MGP_BALBcJ_G0022094__Pmm1	460.976	-0.28744	0.128626	-2.23469	0.0254375	0.238415
MGP_BALBcJ_G0007231__Gm45151	55.2754	-0.837231	0.374734	-2.2342	0.0254698	0.238435
MGP_BALBcJ_G0019848__Rgs6	10.1613	1.7555	0.785711	2.23428	0.0254648	0.238435
MGP_BALBcJ_G0019345__Llgl2	853.545	-0.330098	0.147824	-2.23304	0.0255463	0.238869
MGP_BALBcJ_G0033028__Phkg2	944.585	-0.231477	0.103653	-2.2332	0.0255358	0.238869
MGP_BALBcJ_G0018519__Dlg4	117.383	0.507062	0.227236	2.23143	0.0256524	0.238949
MGP_BALBcJ_G0020689__Ice1	1796.44	-0.205124	0.0918779	-2.23257	0.0255771	0.238949
MGP_BALBcJ_G0023286__Msrb1	4065.91	-0.296121	0.132705	-2.23143	0.0256529	0.238949
MGP_BALBcJ_G0024964__Ptar1	157.067	-0.555865	0.249053	-2.23192	0.0256204	0.238949
MGP_BALBcJ_G0025801__Zak	1564.28	-0.235677	0.105633	-2.2311	0.0256747	0.238949
MGP_BALBcJ_G0027364__Smg5	2396.34	-0.236348	0.105934	-2.23109	0.0256754	0.238949
MGP_BALBcJ_G0033270__Cttn	7758.76	-0.22133	0.0991502	-2.23227	0.0255971	0.238949
MGP_BALBcJ_G0036966__Gm43696	7.03278	1.87219	0.838717	2.2322	0.0256016	0.238949
MGP_BALBcJ_G0015631__B130055M24Rik	47.0245	-0.691731	0.3101	-2.23067	0.0257032	0.239067
MGP_BALBcJ_G0024759__Rtn3	9309.28	-0.201151	0.0902194	-2.22958	0.0257754	0.239598
MGP_BALBcJ_G0004730__AV356131	28.6023	-0.96055	0.431064	-2.22832	0.025859	0.240234
MGP_BALBcJ_G0017673__Tbc1d15	2138.94	-0.209431	0.0940231	-2.22744	0.0259177	0.240639
MGP_BALBcJ_G0023817__Frs3	88.2848	-0.566143	0.254317	-2.22613	0.0260056	0.241171
MGP_BALBcJ_G0031995__Clip3	166.128	0.505855	0.227225	2.22623	0.0259989	0.241171
MGP_BALBcJ_G0016227__Agap1	1620.52	-0.296977	0.133469	-2.22507	0.0260764	0.241687
MGP_BALBcJ_G0026482__Ptpra	2149.75	-0.222289	0.0999206	-2.22466	0.0261044	0.241805
MGP_BALBcJ_G0021753__Osr2	20.3017	0.990808	0.445476	2.22415	0.026138	0.241856
MGP_BALBcJ_G0035156__Ppp2r3a	3658.15	-0.302757	0.136124	-2.22412	0.0261404	0.241856
MGP_BALBcJ_G0015357__A430018G15Rik	33.9008	-0.663696	0.298866	-2.22071	0.0263704	0.243422
MGP_BALBcJ_G0025753__Galnt3	2417.51	0.262902	0.118384	2.22075	0.0263677	0.243422
MGP_BALBcJ_G0030569__NA	2541.68	-0.222257	0.100094	-2.22048	0.0263865	0.243422
MGP_BALBcJ_G0033296__Retn	1451.02	-0.711019	0.320136	-2.22099	0.0263515	0.243422
MGP_BALBcJ_G0034047__Dus2	164.448	0.396965	0.178769	2.22054	0.0263819	0.243422
MGP_BALBcJ_G0016100__Wnt6	26.0013	1.01916	0.459254	2.21916	0.0264758	0.243832
MGP_BALBcJ_G0019881__Npc2	6322.72	0.307777	0.138692	2.21914	0.0264771	0.243832
MGP_BALBcJ_G0028332__Prpf4	968.242	-0.234233	0.105548	-2.21921	0.0264723	0.243832
MGP_BALBcJ_G0028971__Ece1	3992.92	0.299865	0.135153	2.21871	0.0265066	0.243963
MGP_BALBcJ_G0021597__Ednrb	1119.92	0.679203	0.306193	2.21822	0.0265398	0.244127
MGP_BALBcJ_G0027042__Chmp4c	1719.2	-0.35867	0.161719	-2.21785	0.026565	0.244216
MGP_BALBcJ_G0017898__Rnf185	1546.84	-0.236269	0.106555	-2.21734	0.0266	0.244396
MGP_BALBcJ_G0026279__BC052040	127.119	0.414004	0.186775	2.2166	0.0266505	0.244718
MGP_BALBcJ_G0018069__Snrnp25	66.6549	0.601473	0.271478	2.21555	0.0267223	0.245235
MGP_BALBcJ_G0016525__Fam129a	1848.78	0.36603	0.165234	2.21522	0.0267449	0.245301
MGP_BALBcJ_G0034073__Nqo1	190.661	-0.715814	0.323301	-2.21408	0.0268235	0.245879
MGP_BALBcJ_G0034099__Mtss1l	1455.32	0.48329	0.218343	2.21344	0.0268673	0.246138
MGP_BALBcJ_G0028551__Eps15	2164.17	-0.230015	0.103939	-2.21297	0.0268996	0.246292
MGP_BALBcJ_G0026178__Lmo2	512.715	0.508835	0.229963	2.21268	0.0269197	0.246334
MGP_BALBcJ_G0027231__Arhgef26	561.291	-0.597362	0.270004	-2.21242	0.0269379	0.246358
MGP_BALBcJ_G0020810__Hexb	1441.33	0.607603	0.274667	2.21214	0.026957	0.246391
MGP_BALBcJ_G0017288__Bcr	1658.64	-0.209214	0.0946074	-2.21139	0.0270089	0.246609
MGP_BALBcJ_G0019447__Hgs	1688.78	-0.222306	0.10053	-2.21134	0.027012	0.246609
MGP_BALBcJ_G0034111__Rfwd3	873.74	-0.252817	0.114346	-2.21098	0.0270376	0.2467
MGP_BALBcJ_G0018724__Tmem199	546.543	0.247558	0.112002	2.21031	0.0270839	0.246981
MGP_BALBcJ_G0029559__Pds5a	2538.27	-0.183157	0.0829015	-2.20934	0.0271511	0.247204
MGP_BALBcJ_G0032313__Ube3a	2142.39	-0.237034	0.10729	-2.20928	0.0271552	0.247204
MGP_BALBcJ_G0033434__Plat	416.567	0.727088	0.329083	2.20944	0.0271443	0.247204
MGP_BALBcJ_G0024186__Lims2	379.948	0.331831	0.150261	2.20837	0.0272186	0.247639
MGP_BALBcJ_G0034048__Ddx28	202.156	0.333147	0.150889	2.20789	0.0272517	0.247798
MGP_BALBcJ_G0032070__Slc7a10	463.558	-0.46846	0.212206	-2.20758	0.0272739	0.247858
MGP_BALBcJ_G0031506__Tfpt	295.617	-0.250708	0.113588	-2.20717	0.0273024	0.247975
MGP_BALBcJ_G0016695__Ufc1	1971.68	0.213483	0.0967634	2.20624	0.0273674	0.248214
MGP_BALBcJ_G0026365__Pdia3	17968.5	0.344059	0.155947	2.20626	0.0273661	0.248214
MGP_BALBcJ_G0030716__NA	446.967	-0.231851	0.105094	-2.20612	0.0273758	0.248214
MGP_BALBcJ_G0024089__Zeb1	349.818	0.408376	0.18513	2.20589	0.027392	0.24822
MGP_BALBcJ_G0000460__NA	34.4102	-0.735104	0.333457	-2.20449	0.0274896	0.248962
MGP_BALBcJ_G0030842__Kdm3a	1769.53	-0.353418	0.160346	-2.2041	0.0275174	0.249071
MGP_BALBcJ_G0025032__Lipa	20347.3	0.281314	0.127653	2.20374	0.0275427	0.249158
MGP_BALBcJ_G0004298__NA	334.907	-0.289998	0.131613	-2.20341	0.0275657	0.249224
MGP_BALBcJ_G0018009__Aftph	3643.17	-0.198635	0.0901824	-2.2026	0.0276232	0.249506
MGP_BALBcJ_G0028948__NA	2099.17	-0.23549	0.106918	-2.20252	0.0276284	0.249506
MGP_BALBcJ_G0024161__Zfp35	502.616	-0.286516	0.130134	-2.20169	0.0276871	0.249893
MGP_BALBcJ_G0033033__Ctf1	111.813	-0.500669	0.227514	-2.2006	0.0277641	0.250446
MGP_BALBcJ_G0017101__Gtf3c6	548.403	0.261165	0.118703	2.20015	0.0277962	0.250488
MGP_BALBcJ_G0024940__Rfk	5864.52	0.301632	0.1371	2.20009	0.0278004	0.250488
MGP_BALBcJ_G0030236__Zscan21	803.444	-0.269932	0.122774	-2.1986	0.0279063	0.2513
MGP_BALBcJ_G0021281__Cdh24	78.9224	0.493769	0.224691	2.19754	0.0279816	0.251549
MGP_BALBcJ_G0030160__Pom121	1024.42	-0.267812	0.121853	-2.19783	0.0279609	0.251549
MGP_BALBcJ_G0034178__Emc8	762.512	0.200471	0.091222	2.19762	0.0279764	0.251549
MGP_BALBcJ_G0019226__Mrc2	472.425	0.779809	0.354965	2.19686	0.0280303	0.251843
MGP_BALBcJ_G0017402__Misp	75.1021	-0.683619	0.3113	-2.19601	0.0280911	0.252247
MGP_BALBcJ_G0029311__Fam126a	559.273	0.262151	0.119395	2.19567	0.0281154	0.252322
MGP_BALBcJ_G0019209__Gosr2	2485.91	0.168287	0.0766779	2.19473	0.0281831	0.25259
MGP_BALBcJ_G0020906__Fst	220.823	0.803185	0.365984	2.19459	0.028193	0.25259
MGP_BALBcJ_G0022432__Glis2	144.851	0.501907	0.228701	2.19459	0.0281927	0.25259
MGP_BALBcJ_G0030121__Tmem248	2051.74	0.209583	0.0955249	2.19402	0.0282341	0.252815
MGP_BALBcJ_G0034218__Dpep1	595.934	0.607876	0.277191	2.19298	0.0283085	0.253338
MGP_BALBcJ_G0018481__Sat2	77.1888	0.563112	0.256921	2.19177	0.0283961	0.253978
MGP_BALBcJ_G0022106__37865	52.8914	0.77862	0.355363	2.19105	0.028448	0.254042
MGP_BALBcJ_G0026785__Chd6	1898.51	-0.21647	0.0987995	-2.19101	0.0284513	0.254042
MGP_BALBcJ_G0035013__Leo1	821.205	-0.242191	0.110532	-2.19114	0.0284418	0.254042
MGP_BALBcJ_G0023738__Pla2g7	883.523	0.625911	0.2858	2.19003	0.0285218	0.254463
MGP_BALBcJ_G0029840__Fgfrl1	716.77	0.354179	0.161732	2.18991	0.0285305	0.254463
MGP_BALBcJ_G0018843__Rad51c	38.8722	0.723027	0.33021	2.1896	0.0285536	0.254525
MGP_BALBcJ_G0030089__Bri3bp	359.223	0.330435	0.150931	2.18931	0.028574	0.254564
MGP_BALBcJ_G0025385__Ehmt1	1901.68	-0.211775	0.0967611	-2.18863	0.0286236	0.254863
MGP_BALBcJ_G0023724__9130008F23Rik	52.2597	-0.764866	0.349712	-2.18713	0.0287327	0.25569
MGP_BALBcJ_G0028955__Ephb2	53.8867	0.757426	0.346469	2.18613	0.0288062	0.256057
MGP_BALBcJ_G0029376__Ost4	1265.95	0.252257	0.115388	2.18617	0.0288033	0.256057
MGP_BALBcJ_G0020989__Mss51	87.6901	-0.597843	0.273651	-2.18469	0.0289118	0.256564
MGP_BALBcJ_G0028678__Ybx1	6861.77	0.174757	0.0799895	2.18475	0.0289075	0.256564
MGP_BALBcJ_G0034656__Trim29	477.925	0.373093	0.17077	2.18476	0.0289063	0.256564
MGP_BALBcJ_G0007261__NA	18.9576	1.22716	0.561803	2.18432	0.0289388	0.25666
MGP_BALBcJ_G0015766__Sgk3	406.133	0.421242	0.19288	2.18396	0.0289653	0.256751
MGP_BALBcJ_G0023141__Tbp	487.274	-0.274265	0.12561	-2.18347	0.0290012	0.256925
MGP_BALBcJ_G0018971__Socs7	928.144	-0.27246	0.124804	-2.18311	0.0290277	0.257017
MGP_BALBcJ_G0027000__Tpd52l2	2021.61	-0.18201	0.0834074	-2.18218	0.0290962	0.25748
MGP_BALBcJ_G0022027__H1f0	1502.36	-0.460701	0.211167	-2.1817	0.0291319	0.257508
MGP_BALBcJ_G0034876__Parp6	874.998	-0.244231	0.111944	-2.18171	0.0291308	0.257508
MGP_BALBcJ_G0015565__8030453O22Rik	11.3717	1.49059	0.683297	2.18146	0.0291492	0.257517
MGP_BALBcJ_G0015752__Rgs20	334.581	-0.404743	0.185674	-2.17986	0.0292682	0.258424
MGP_BALBcJ_G0023833__Nfya	1329.62	-0.279024	0.128025	-2.17945	0.0292984	0.258547
MGP_BALBcJ_G0021053__Chdh	2337.79	-0.405846	0.18624	-2.17916	0.0293196	0.25859
MGP_BALBcJ_G0036235__Tlr7	207.808	0.59234	0.271998	2.17773	0.0294259	0.259383
MGP_BALBcJ_G0019677__Eapp	961.339	-0.208674	0.0958347	-2.17744	0.0294477	0.259431
MGP_BALBcJ_G0016440__Btg2	3958.86	-0.682034	0.313448	-2.1759	0.0295624	0.259864
MGP_BALBcJ_G0028934__Pnrc2	2358.91	-0.183381	0.0842633	-2.17628	0.0295341	0.259864
MGP_BALBcJ_G0029163__Kcnab2	178.862	0.815781	0.374907	2.17596	0.0295585	0.259864
MGP_BALBcJ_G0034253__Gnpat	1431.5	-0.196049	0.0900856	-2.17625	0.0295367	0.259864
MGP_BALBcJ_G0025238__Adrb1	65.476	-0.860088	0.395378	-2.17536	0.0296033	0.259996
MGP_BALBcJ_G0025777__Phospho2	520.218	-0.263268	0.121028	-2.17527	0.0296102	0.259996
MGP_BALBcJ_G0021034__Dennd6a	2218.96	-0.381939	0.175687	-2.17397	0.0297073	0.260687
MGP_BALBcJ_G0030513__Smo	1092.63	0.230462	0.106031	2.17353	0.0297404	0.260687
MGP_BALBcJ_G0034491__Arhgap32	707.878	-0.250447	0.115236	-2.17334	0.0297547	0.260687
MGP_BALBcJ_G0034609__AW551984	79.2174	-0.980577	0.451165	-2.17343	0.0297477	0.260687
MGP_BALBcJ_G0027878__Ube2d3	6686.23	-0.164698	0.0757964	-2.1729	0.0297878	0.260688
MGP_BALBcJ_G0028605__Pik3r3	691.873	0.4512	0.207646	2.17293	0.0297855	0.260688
MGP_BALBcJ_G0024294__Pcdhb19	93.1579	-0.405247	0.186554	-2.17227	0.0298353	0.26096
MGP_BALBcJ_G0017727__Tmem5	628.301	-0.24003	0.110639	-2.16949	0.0300458	0.262511
MGP_BALBcJ_G0023792__Gnmt	25.2717	-1.33595	0.615749	-2.16964	0.0300342	0.262511
MGP_BALBcJ_G0021129__Ldb3	410.886	-0.37498	0.172895	-2.16882	0.0300961	0.262806
MGP_BALBcJ_G0023819__Tfeb	365.985	-0.278817	0.128592	-2.16823	0.0301408	0.262907
MGP_BALBcJ_G0035130__Copb2	5152.94	0.137056	0.0632081	2.16832	0.030134	0.262907
MGP_BALBcJ_G0024631__2010003K11Rik	19.0856	-1.553	0.716444	-2.16765	0.0301855	0.263046
MGP_BALBcJ_G0033291__Camsap3	1410.81	-0.346088	0.159665	-2.16759	0.03019	0.263046
MGP_BALBcJ_G0028588__Efcab14	1555.59	0.17939	0.0827847	2.16695	0.0302385	0.26318
MGP_BALBcJ_G0035237__Sema3b	78.4165	0.625038	0.288413	2.16717	0.0302221	0.26318
MGP_BALBcJ_G0015516__Gm12940	685.04	-0.288886	0.133387	-2.16578	0.0303281	0.263329
MGP_BALBcJ_G0018225__9530068E07Rik	3945.7	0.197467	0.0911674	2.16598	0.0303127	0.263329
MGP_BALBcJ_G0018657__Slc43a2	10128.3	0.325184	0.1501	2.16645	0.0302768	0.263329
MGP_BALBcJ_G0028360__Tlr4	2412.5	-0.271384	0.125341	-2.16516	0.0303753	0.263329
MGP_BALBcJ_G0028669__Lao1	9231.96	-1.57322	0.72638	-2.16584	0.0303237	0.263329
MGP_BALBcJ_G0029726__Cxcl10	36.618	1.34984	0.623428	2.16519	0.030373	0.263329
MGP_BALBcJ_G0031527__Eps8l1	333.022	-0.450394	0.208024	-2.16511	0.0303795	0.263329
MGP_BALBcJ_G0035421__Vipr1	4474.04	0.609872	0.281698	2.16499	0.0303886	0.263329
MGP_BALBcJ_G0028653__2610528J11Rik	314.873	0.32316	0.149301	2.16448	0.0304273	0.263521
MGP_BALBcJ_G0030761__Avl9	2169.07	-0.239328	0.110606	-2.16378	0.0304811	0.263842
MGP_BALBcJ_G0018684__Efcab5	21.1807	0.881546	0.40748	2.16341	0.0305096	0.263945
MGP_BALBcJ_G0029265__Rundc3b	8.39455	-1.47895	0.683785	-2.16288	0.0305503	0.264153
MGP_BALBcJ_G0016097__Ttll4	1372.03	-0.315052	0.145747	-2.16164	0.030646	0.264403
MGP_BALBcJ_G0016359__Gpr39	53.2528	0.84202	0.389528	2.16164	0.0306458	0.264403
MGP_BALBcJ_G0017354__Aire	6.88429	-2.76123	1.27721	-2.16192	0.030624	0.264403
MGP_BALBcJ_G0024334__Fgf1	1181.53	0.441794	0.204349	2.16196	0.0306213	0.264403
MGP_BALBcJ_G0005003__Gm20045	283.538	-0.434876	0.201212	-2.16128	0.030674	0.264501
MGP_BALBcJ_G0019263__Helz	1738.58	-0.218413	0.101109	-2.16017	0.0307597	0.264693
MGP_BALBcJ_G0021699__Npr3	200.699	0.750823	0.347574	2.16018	0.0307585	0.264693
MGP_BALBcJ_G0027675__Rsbn1	888.591	-0.270186	0.125079	-2.16012	0.0307631	0.264693
MGP_BALBcJ_G0031989__Capns1	4913.44	0.144515	0.0668946	2.16034	0.030746	0.264693
MGP_BALBcJ_G0018733__Ksr1	304.696	-0.411113	0.190406	-2.15914	0.0308397	0.265208
MGP_BALBcJ_G0020736__Nr2f1	15.5905	1.12973	0.523685	2.15727	0.0309844	0.266308
MGP_BALBcJ_G0004490__Kcnq1ot1	166.677	-0.582528	0.270092	-2.15678	0.0310231	0.266496
MGP_BALBcJ_G0025700__Rbm43	296.973	-0.299115	0.138706	-2.15647	0.0310469	0.266556
MGP_BALBcJ_G0010377__NA	9.56719	-1.25848	0.584242	-2.15404	0.0312373	0.266887
MGP_BALBcJ_G0015312__Tmem134	1422.75	-0.175376	0.081411	-2.15421	0.0312238	0.266887
MGP_BALBcJ_G0019374__Ube2o	905.276	-0.189332	0.0878744	-2.15457	0.0311952	0.266887
MGP_BALBcJ_G0020048__Yy1	1346.47	-0.183168	0.0850532	-2.15357	0.0312742	0.266887
MGP_BALBcJ_G0020098__Zbtb42	805.411	-0.473914	0.220002	-2.15414	0.0312292	0.266887
MGP_BALBcJ_G0026412__Fgf7	104.093	0.692172	0.321433	2.1534	0.0312876	0.266887
MGP_BALBcJ_G0026418__NA	63.2777	1.05116	0.48784	2.15471	0.0311842	0.266887
MGP_BALBcJ_G0029619__Clock	1997.39	-0.226245	0.105033	-2.15405	0.0312366	0.266887
MGP_BALBcJ_G0031261__Acrbp	160.8	-0.42338	0.19649	-2.15471	0.0311844	0.266887
MGP_BALBcJ_G0031495__Bicd1	45.4329	0.628271	0.291722	2.15367	0.0312663	0.266887
MGP_BALBcJ_G0033111__D7Ertd443e	204.983	-0.739479	0.343202	-2.15464	0.0311897	0.266887
MGP_BALBcJ_G0033951__Adgrg1	3219.37	0.238515	0.11073	2.15403	0.0312381	0.266887
MGP_BALBcJ_G0019602__Lamb1	2970.85	0.299988	0.139364	2.15255	0.0313543	0.266927
MGP_BALBcJ_G0021729__Dap	3908.93	0.228834	0.106322	2.15228	0.0313752	0.266927
MGP_BALBcJ_G0025016__Minpp1	358.782	0.253366	0.117729	2.15212	0.0313882	0.266927
MGP_BALBcJ_G0027081__Nceh1	725.963	0.679489	0.315772	2.15184	0.0314101	0.266927
MGP_BALBcJ_G0031258__Pianp	358.448	0.468689	0.217796	2.15196	0.0314001	0.266927
MGP_BALBcJ_G0035055__Lca5	26.2665	0.793608	0.368718	2.15234	0.0313704	0.266927
MGP_BALBcJ_G0035073__Cep162	567.281	-0.264073	0.122701	-2.15217	0.0313843	0.266927
MGP_BALBcJ_G0022703__Ubxn7	1718.53	-0.253175	0.117691	-2.15119	0.0314614	0.26722
MGP_BALBcJ_G0022850__Rpl24	33.9012	-0.823295	0.382758	-2.15095	0.0314798	0.267232
MGP_BALBcJ_G0018268__Slc36a1	983.032	0.214209	0.099623	2.1502	0.0315396	0.267311
MGP_BALBcJ_G0025395__Tor4a	824.662	0.166946	0.0776369	2.15034	0.0315283	0.267311
MGP_BALBcJ_G0026795__Jph2	168.295	0.584084	0.271641	2.1502	0.0315392	0.267311
MGP_BALBcJ_G0017092__Traf3ip2	578.352	0.284668	0.132457	2.14913	0.031624	0.267335
MGP_BALBcJ_G0020472__Id4	72.546	0.613101	0.285396	2.14825	0.0316943	0.267335
MGP_BALBcJ_G0020645__Mterf3	539.292	-0.27483	0.127901	-2.14877	0.0316526	0.267335
MGP_BALBcJ_G0022046__Fam227a	105.713	-0.525213	0.244435	-2.14868	0.0316594	0.267335
MGP_BALBcJ_G0025669__NA	827.967	-0.197014	0.091678	-2.14898	0.0316362	0.267335
MGP_BALBcJ_G0026386__Duoxa1	766.021	-1.10479	0.513884	-2.14989	0.031564	0.267335
MGP_BALBcJ_G0029197__Nadk	4338.66	0.163424	0.0760511	2.14886	0.0316451	0.267335
MGP_BALBcJ_G0031827__Cd177	48.7015	-1.19249	0.555059	-2.14839	0.0316824	0.267335
MGP_BALBcJ_G0034121__Tmem170	400.077	-0.2377	0.11064	-2.1484	0.0316821	0.267335
MGP_BALBcJ_G0024084__Map3k8	397.585	-0.542841	0.252784	-2.14745	0.0317578	0.267728
MGP_BALBcJ_G0016969__Heca	1264.74	-0.417864	0.194708	-2.1461	0.0318647	0.2684
MGP_BALBcJ_G0028253__Tex10	456.527	-0.223549	0.104169	-2.14602	0.0318713	0.2684
MGP_BALBcJ_G0021165__Cnih1	1075.5	0.222879	0.103881	2.14552	0.0319114	0.268594
MGP_BALBcJ_G0013785__NA	17.7096	-0.966962	0.450886	-2.14458	0.0319861	0.268813
MGP_BALBcJ_G0025404__Ndor1	1852.56	-0.213856	0.0997201	-2.14456	0.0319883	0.268813
MGP_BALBcJ_G0032393__Idh2	4435.43	0.260639	0.121511	2.14498	0.0319545	0.268813
MGP_BALBcJ_G0006442__E130102H24Rik	282.183	-0.372134	0.173678	-2.14267	0.0321396	0.269514
MGP_BALBcJ_G0016125__Gmppa	1805.21	0.181874	0.0848704	2.14295	0.0321167	0.269514
MGP_BALBcJ_G0017363__Pdxk	4241.56	0.488988	0.228193	2.14287	0.0321232	0.269514
MGP_BALBcJ_G0026940__Gnas	11833.2	0.221122	0.103174	2.1432	0.0320967	0.269514
MGP_BALBcJ_G0020429__Tfap2a	1875.12	-0.364268	0.170044	-2.1422	0.0321778	0.269548
MGP_BALBcJ_G0025549__Prrx2	49.9262	1.10601	0.516272	2.14229	0.0321698	0.269548
MGP_BALBcJ_G0016441__Chit1	23.1233	-1.69031	0.789196	-2.14181	0.0322091	0.269668
MGP_BALBcJ_G0025494__1700007K13Rik	21.61	0.949449	0.443507	2.14078	0.0322919	0.270219
MGP_BALBcJ_G0026796__Oser1	1154.56	-0.16017	0.0748306	-2.14044	0.0323192	0.270304
MGP_BALBcJ_G0025665__Rc3h2	689.878	-0.295028	0.137906	-2.13935	0.0324076	0.2709
MGP_BALBcJ_G0025613__Gapvd1	2463.68	-0.178886	0.0836285	-2.13905	0.0324315	0.270958
MGP_BALBcJ_G0018194__Zfp2	277.709	-0.31134	0.145643	-2.1377	0.0325413	0.271112
MGP_BALBcJ_G0019295__Cpsf4l	609.271	-0.390071	0.182516	-2.13719	0.0325825	0.271112
MGP_BALBcJ_G0020803__Col4a3bp	1531.86	-0.313598	0.146721	-2.13738	0.0325673	0.271112
MGP_BALBcJ_G0021508__Hr	484.336	-0.365083	0.170854	-2.13681	0.0326136	0.271112
MGP_BALBcJ_G0025775__Ppig	1969.63	-0.156763	0.0733616	-2.13686	0.0326098	0.271112
MGP_BALBcJ_G0026492__4930402H24Rik	2861.62	-0.285701	0.133663	-2.13748	0.0325587	0.271112
MGP_BALBcJ_G0027922__NA	2450.34	0.533251	0.249542	2.13692	0.0326048	0.271112
MGP_BALBcJ_G0029962__Wsb2	1529.28	0.226594	0.106048	2.13672	0.032621	0.271112
MGP_BALBcJ_G0030620__Sval2	6.9014	-2.69477	1.26047	-2.13791	0.0325237	0.271112
MGP_BALBcJ_G0034344__Naalad2	69.8631	0.561583	0.262617	2.13841	0.0324838	0.271112
MGP_BALBcJ_G0018347__Cops3	1187.01	-0.169504	0.0793497	-2.13617	0.0326657	0.271316
MGP_BALBcJ_G0020143__NA	39.1126	0.638411	0.298882	2.136	0.0326798	0.271316
MGP_BALBcJ_G0010205__NA	34.03	-0.706697	0.33108	-2.13452	0.0328001	0.272029
MGP_BALBcJ_G0032908__Dcun1d3	387.045	-0.364136	0.17058	-2.13469	0.032786	0.272029
MGP_BALBcJ_G0000293__NA	50.945	-0.577617	0.270671	-2.13402	0.0328412	0.272086
MGP_BALBcJ_G0031925__Rps16	5399.77	-0.179935	0.0843125	-2.13414	0.0328313	0.272086
MGP_BALBcJ_G0017677__Zfc3h1	3281.12	-0.224547	0.105251	-2.13344	0.0328886	0.272194
MGP_BALBcJ_G0032486__Eed	740.593	-0.320744	0.150341	-2.13345	0.0328882	0.272194
MGP_BALBcJ_G0021778__Fzd6	961.081	0.265355	0.124399	2.13309	0.0329174	0.27229
MGP_BALBcJ_G0025703__Rif1	1108.97	-0.321655	0.150815	-2.13278	0.0329429	0.272359
MGP_BALBcJ_G0017721__Rassf3	3842.27	-0.231492	0.108593	-2.13173	0.033029	0.272502
MGP_BALBcJ_G0020669__NA	343.984	-0.282353	0.132452	-2.13174	0.0330279	0.272502
MGP_BALBcJ_G0026435__Gpat2	9.43497	2.12526	0.996752	2.13218	0.0329917	0.272502
MGP_BALBcJ_G0027955__Ifi44l	191.353	0.799864	0.375183	2.13193	0.0330125	0.272502
MGP_BALBcJ_G0022686__Apod	3235.37	-1.10368	0.517955	-2.13084	0.0331024	0.272824
MGP_BALBcJ_G0030070__Sbno1	2984.24	-0.160449	0.0752919	-2.13102	0.0330873	0.272824
MGP_BALBcJ_G0006829__D5Ertd605e	7.23293	1.59294	0.747692	2.13047	0.0331329	0.272825
MGP_BALBcJ_G0019572__Taf1b	295.018	-0.265593	0.124688	-2.13007	0.033166	0.272825
MGP_BALBcJ_G0021674__Nipbl	3263.72	-0.189083	0.0887715	-2.13	0.0331714	0.272825
MGP_BALBcJ_G0025219__Smc3	1672.66	-0.184141	0.0864416	-2.13023	0.0331522	0.272825
MGP_BALBcJ_G0017283__Zwint	2662.28	-0.301956	0.141861	-2.12852	0.0332936	0.27298
MGP_BALBcJ_G0018931__Abi3	225.969	0.562531	0.264242	2.12885	0.0332668	0.27298
MGP_BALBcJ_G0019433__Enthd2	459.773	-0.250131	0.117487	-2.12902	0.0332529	0.27298
MGP_BALBcJ_G0031952__Actn4	21802	-0.198937	0.0934212	-2.12947	0.0332155	0.27298
MGP_BALBcJ_G0033218__Tspan4	848.521	0.294905	0.13852	2.12898	0.0332561	0.27298
MGP_BALBcJ_G0036165__Kctd12b	365.167	0.428774	0.201427	2.12868	0.0332808	0.27298
MGP_BALBcJ_G0019778__Hif1a	2816.97	0.356082	0.167365	2.12758	0.033372	0.273405
MGP_BALBcJ_G0032408__Crtc3	931.659	-0.173138	0.0813818	-2.12748	0.03338	0.273405
MGP_BALBcJ_G0029377__Emilin1	565.637	0.743468	0.349542	2.12698	0.0334217	0.273606
MGP_BALBcJ_G0028295__NA	4191.91	0.181555	0.0853924	2.12612	0.0334929	0.274047
MGP_BALBcJ_G0016852__Bpnt1	835.218	0.196882	0.0926351	2.12535	0.0335571	0.27443
MGP_BALBcJ_G0026572__Crnkl1	779.578	-0.220108	0.103573	-2.12514	0.0335747	0.274433
MGP_BALBcJ_G0004588__Gm16536	195.226	-0.345708	0.162702	-2.12479	0.033604	0.274531
MGP_BALBcJ_G0025301__Upf2	1307.41	-0.209616	0.0986809	-2.12418	0.0336553	0.274808
MGP_BALBcJ_G0021772__Ubr5	5482.92	-0.162443	0.0764988	-2.12347	0.0337141	0.274864
MGP_BALBcJ_G0025203__Col17a1	1753.98	0.537082	0.252906	2.12364	0.0336998	0.274864
MGP_BALBcJ_G0025346__Mllt10	1191.33	-0.292318	0.137641	-2.12377	0.0336891	0.274864
MGP_BALBcJ_G0001829__NA	11.4497	-2.082	0.980791	-2.12277	0.0337729	0.275201
MGP_BALBcJ_G0029802__Lrrc8c	391.697	0.546702	0.257617	2.12215	0.0338251	0.275485
MGP_BALBcJ_G0025410__Lrrc26	147.203	-0.933292	0.439975	-2.12124	0.0339018	0.275968
MGP_BALBcJ_G0018886__Mbtd1	1609.82	-0.240398	0.113389	-2.12012	0.0339961	0.276583
MGP_BALBcJ_G0031882__Rab4b	59.0778	-0.492036	0.232101	-2.11993	0.0340122	0.276583
MGP_BALBcJ_G0021769__Ncald	846.5	-0.473776	0.223552	-2.11931	0.0340641	0.276721
MGP_BALBcJ_G0032167__Zfp473	14.6762	-1.27065	0.599516	-2.11947	0.034051	0.276721
MGP_BALBcJ_G0019180__Gpatch8	1565.71	-0.228101	0.107671	-2.11849	0.0341335	0.277001
MGP_BALBcJ_G0032441__Il16	337.895	0.641313	0.302719	2.11851	0.0341318	0.277001
MGP_BALBcJ_G0033663__Gatad2a	2537.45	-0.189969	0.0897048	-2.11771	0.0341992	0.277392
MGP_BALBcJ_G0027136__4932438A13Rik	2412.1	-0.308155	0.145557	-2.11707	0.0342538	0.277692
MGP_BALBcJ_G0015788__Sbspon	11.9676	1.217	0.57512	2.11608	0.0343379	0.278232
MGP_BALBcJ_G0019865__Dnal1	455.292	0.360126	0.170238	2.11543	0.0343936	0.278541
MGP_BALBcJ_G0019115__Stat3	15333.1	-0.196793	0.0930596	-2.1147	0.0344557	0.278901
MGP_BALBcJ_G0017440__Mex3d	523.343	-0.467257	0.221075	-2.11357	0.0345517	0.279397
MGP_BALBcJ_G0033102__Ctbp2	1778.36	-0.201419	0.095298	-2.11357	0.0345522	0.279397
MGP_BALBcJ_G0021044__Fam208a	1753.22	-0.264052	0.124946	-2.11333	0.0345727	0.27942
MGP_BALBcJ_G0016680__Fcgr4	179.807	0.78845	0.373124	2.1131	0.034592	0.279433
MGP_BALBcJ_G0022687__Bdh1	975.059	0.410694	0.194413	2.11248	0.0346453	0.279722
MGP_BALBcJ_G0016819__Nvl	1293.3	-0.198324	0.0938933	-2.11223	0.034667	0.279755
MGP_BALBcJ_G0019024__Tns4	567.198	0.434288	0.205653	2.11175	0.0347079	0.279799
MGP_BALBcJ_G0024149__Rnf125	592.68	-0.538248	0.254869	-2.11186	0.0346987	0.279799
MGP_BALBcJ_G0020555__B4galt7	528.913	0.312473	0.148016	2.11108	0.0347655	0.280121
MGP_BALBcJ_G0036971__Gm42658	42.5609	-0.666948	0.315986	-2.11069	0.0347988	0.280247
MGP_BALBcJ_G0020157__Wdr37	850.874	-0.274315	0.129992	-2.11024	0.0348376	0.280417
MGP_BALBcJ_G0021968__Slc39a4	725.353	-0.81867	0.388317	-2.10825	0.0350094	0.281512
MGP_BALBcJ_G0022044__Ddx17	13048.9	-0.132494	0.0628632	-2.10765	0.0350611	0.281512
MGP_BALBcJ_G0023106__1700010I14Rik	68.7607	0.532516	0.25266	2.10764	0.0350625	0.281512
MGP_BALBcJ_G0030015__Fam109a	404.184	-0.289725	0.137463	-2.10765	0.0350614	0.281512
MGP_BALBcJ_G0035914__Pdzd11	794.562	0.191428	0.0908072	2.10807	0.0350252	0.281512
MGP_BALBcJ_G0023121__Mrpl18	699.892	0.214278	0.1017	2.10696	0.0351209	0.281838
MGP_BALBcJ_G0030071__Kmt5a	3238.36	-0.199961	0.0949368	-2.10625	0.0351825	0.28219
MGP_BALBcJ_G0018814__Pigw	186.923	-0.326197	0.154917	-2.10562	0.0352374	0.282301
MGP_BALBcJ_G0019255__Ddx5	25817	-0.163394	0.0775935	-2.10577	0.0352247	0.282301
MGP_BALBcJ_G0030444__2610001J05Rik	731.639	0.182454	0.0866568	2.10548	0.0352498	0.282301
MGP_BALBcJ_G0022629__Tmem41a	311.963	-0.345294	0.164115	-2.10397	0.035381	0.283145
MGP_BALBcJ_G0029314__Kcnh2	9.21525	1.24309	0.590864	2.10386	0.0353908	0.283145
MGP_BALBcJ_G0016407__Elk4	1278.44	-0.186957	0.088997	-2.10071	0.0356666	0.28424
MGP_BALBcJ_G0016423__Ppp1r15b	3155.28	-0.165358	0.0787264	-2.10041	0.0356927	0.28424
MGP_BALBcJ_G0018042__Efemp1	561.827	-0.4611	0.219588	-2.09984	0.035743	0.28424
MGP_BALBcJ_G0021453__Clu	164975	0.723425	0.344411	2.10047	0.0356873	0.28424
MGP_BALBcJ_G0024108__Greb1l	10.2691	1.25475	0.59712	2.10134	0.0356115	0.28424
MGP_BALBcJ_G0026163__Commd9	804.715	0.245174	0.116663	2.10156	0.0355921	0.28424
MGP_BALBcJ_G0027890__Dapp1	285.502	0.602785	0.287045	2.09997	0.0357319	0.28424
MGP_BALBcJ_G0028603__Tspan1	31.9682	-0.81545	0.388305	-2.10002	0.0357268	0.28424
MGP_BALBcJ_G0031192__Mical3	2227.01	-0.248904	0.118494	-2.10056	0.0356793	0.28424
MGP_BALBcJ_G0031879__Cyp2f2	1142.47	-0.436079	0.207599	-2.10058	0.0356776	0.28424
MGP_BALBcJ_G0032513__Rsf1	1461.86	-0.212111	0.101009	-2.09993	0.0357352	0.28424
MGP_BALBcJ_G0033467__Kcnu1	9.79068	1.34771	0.641637	2.10042	0.0356917	0.28424
MGP_BALBcJ_G0016647__Pogk	1431.37	-0.241229	0.114927	-2.09898	0.0358186	0.284414
MGP_BALBcJ_G0016727__Pigm	1092.66	-0.197044	0.0938659	-2.09921	0.0357987	0.284414
MGP_BALBcJ_G0032312__Atp10a	59.3328	0.850275	0.405084	2.09901	0.035816	0.284414
MGP_BALBcJ_G0025235__Plekhs1	1409.12	-0.759904	0.362109	-2.09855	0.0358565	0.284429
MGP_BALBcJ_G0035056__Sh3bgrl2	67.7915	-0.62309	0.296912	-2.09857	0.0358548	0.284429
MGP_BALBcJ_G0032542__Neu3	40.8503	0.625098	0.297944	2.09804	0.0359015	0.284644
[truncated: 13,850 more rows]
