# Supplementary material for: Estrogen exacerbates mammary involution through neutrophil-dependent and -independent mechanism
Source: eLife journal article supplement (doi:10.7554/elife.57274), 2020-07-24
Supplement: supp [file elife-57274-supp-v1.zip › elife_poa_e57274_Figure_2_source_data_4.xlsx]

## Sheet: groupD_Vs_groupC
	baseMean	log2FoldChange	lfcSE	stat	pvalue	padj
MGP_BALBcJ_G0016079__Cxcr2	164.293	-7.55141	1.0307	-7.32649	2.36263e-13	1.80962e-09
MGP_BALBcJ_G0017921__Osm	120.762	-4.60525	0.628761	-7.32432	2.40114e-13	1.80962e-09
MGP_BALBcJ_G0027453__S100a9	1248.93	-7.2267	1.04177	-6.93693	4.00709e-12	1.50997e-08
MGP_BALBcJ_G0032956__Il4ra	4811.5	-1.36263	0.196066	-6.94987	3.65623e-12	1.50997e-08
MGP_BALBcJ_G0022836__Retnlg	79.7889	-5.0663	0.741892	-6.82889	8.5572e-12	2.57965e-08
MGP_BALBcJ_G0009495__Mirt2	43.2326	-9.87153	1.45287	-6.7945	1.08689e-11	2.73045e-08
MGP_BALBcJ_G0021591__Acod1	452.26	-8.70317	1.28954	-6.74905	1.48815e-11	2.80386e-08
MGP_BALBcJ_G0032699__NA	105.459	-4.17743	0.618744	-6.75147	1.46356e-11	2.80386e-08
MGP_BALBcJ_G0027452__S100a8	660.188	-4.84732	0.721828	-6.71534	1.87624e-11	3.14228e-08
MGP_BALBcJ_G0017718__Wif1	66.8536	2.01567	0.302027	6.67379	2.49283e-11	3.18318e-08
MGP_BALBcJ_G0023826__Trem1	145.532	-8.17481	1.22536	-6.67137	2.53421e-11	3.18318e-08
MGP_BALBcJ_G0033187__Ifitm1	234.213	-2.94847	0.441811	-6.67359	2.49623e-11	3.18318e-08
MGP_BALBcJ_G0026416__Hdc	759.059	-4.46583	0.678777	-6.57922	4.72918e-11	5.4833e-08
MGP_BALBcJ_G0023152__Fpr2	77.1741	-4.67809	0.720525	-6.4926	8.43648e-11	9.08308e-08
MGP_BALBcJ_G0015902__Il1r2	153.209	-3.86138	0.598881	-6.44765	1.13598e-10	1.1415e-07
MGP_BALBcJ_G0018781__Slfn4	738.576	-5.52353	0.858358	-6.435	1.23476e-10	1.16322e-07
MGP_BALBcJ_G0017421__Sbno2	6361.1	-0.84166	0.130998	-6.42497	1.31893e-10	1.16943e-07
MGP_BALBcJ_G0023421__Rab44	88.8811	-4.59574	0.71672	-6.41218	1.43449e-10	1.20123e-07
MGP_BALBcJ_G0033350__F10	73.9585	-4.94636	0.777144	-6.36479	1.95556e-10	1.55138e-07
MGP_BALBcJ_G0019475__Slc16a3	368.449	-5.47828	0.861948	-6.3557	2.07485e-10	1.56371e-07
MGP_BALBcJ_G0026464__Il1b	892.352	-4.54989	0.717126	-6.34462	2.22977e-10	1.60045e-07
MGP_BALBcJ_G0025821__Hoxd9	118.972	1.67591	0.264696	6.33145	2.42863e-10	1.66394e-07
MGP_BALBcJ_G0000726__NA	57.3412	-4.25369	0.68883	-6.17524	6.60623e-10	4.32938e-07
MGP_BALBcJ_G0016542__Rgs16	90.9017	-2.94219	0.481805	-6.10659	1.01784e-09	6.13676e-07
MGP_BALBcJ_G0029708__Cxcl2	452.302	-6.10913	0.999494	-6.11222	9.82564e-10	6.13676e-07
MGP_BALBcJ_G0015903__Il1r1	611.046	-1.5241	0.251583	-6.05802	1.37805e-09	7.98897e-07
MGP_BALBcJ_G0016515__NA	90.1253	-4.03589	0.671709	-6.00838	1.87382e-09	1.04608e-06
MGP_BALBcJ_G0030959__Mxd1	947.726	-1.93237	0.325634	-5.93417	2.95334e-09	1.58985e-06
MGP_BALBcJ_G0025031__Ch25h	77.321	-3.19143	0.546268	-5.84225	5.15016e-09	2.58761e-06
MGP_BALBcJ_G0027727__Csf1	1820.07	-1.81139	0.309767	-5.8476	4.98709e-09	2.58761e-06
MGP_BALBcJ_G0018341__Nlrp3	188.784	-3.07827	0.532429	-5.78156	7.40093e-09	3.48607e-06
MGP_BALBcJ_G0028974__Sh2d5	66.4095	-2.78113	0.480634	-5.78638	7.19205e-09	3.48607e-06
MGP_BALBcJ_G0017617__Btg1	520.08	-1.47084	0.254779	-5.773	7.78706e-09	3.5568e-06
MGP_BALBcJ_G0016087__Slc11a1	457.835	-2.51984	0.440318	-5.72277	1.04803e-08	4.64617e-06
MGP_BALBcJ_G0019315__Cd300lf	300.922	-5.06886	0.893885	-5.67059	1.42303e-08	6.12836e-06
MGP_BALBcJ_G0033747__Cyp4f18	188.532	-4.28299	0.756298	-5.6631	1.48665e-08	6.22453e-06
MGP_BALBcJ_G0020074__Tnfaip2	627.364	-2.19731	0.388498	-5.6559	1.5503e-08	6.31558e-06
MGP_BALBcJ_G0035569__Timp1	1190.59	-2.21336	0.393031	-5.63153	1.78622e-08	7.08518e-06
MGP_BALBcJ_G0022943__Adamts1	1153.24	-1.49536	0.269994	-5.5385	3.05072e-08	1.16248e-05
MGP_BALBcJ_G0034296__Mmp8	55.3807	-3.75369	0.677984	-5.53655	3.08492e-08	1.16248e-05
MGP_BALBcJ_G0023830__NA	60.5364	-3.79978	0.689547	-5.51054	3.57734e-08	1.31515e-05
MGP_BALBcJ_G0023612__Ier3	1460.98	-0.91789	0.167086	-5.49351	3.94033e-08	1.41411e-05
MGP_BALBcJ_G0027702__Chil3	64.0763	-4.25131	0.775738	-5.48035	4.24486e-08	1.48797e-05
MGP_BALBcJ_G0001576__NA	22.6571	-4.55527	0.835468	-5.45236	4.97064e-08	1.70278e-05
MGP_BALBcJ_G0021569__Olfm4	28.4335	-5.74261	1.06268	-5.40388	6.52133e-08	2.18436e-05
MGP_BALBcJ_G0022748__Gm5483	22.7122	-6.04006	1.12045	-5.39075	7.01637e-08	2.25016e-05
MGP_BALBcJ_G0026538__Jag1	1010.5	-0.840028	0.155783	-5.39231	6.95577e-08	2.25016e-05
MGP_BALBcJ_G0022944__Adamts5	716.119	-0.728454	0.135338	-5.3825	7.34574e-08	2.25964e-05
MGP_BALBcJ_G0031778__Bcl3	1069.86	-1.12665	0.209317	-5.38252	7.34515e-08	2.25964e-05
MGP_BALBcJ_G0027229__Rap2b	504.955	-0.828301	0.154217	-5.371	7.83014e-08	2.3152e-05
MGP_BALBcJ_G0029523__Lgi2	137.886	-2.1464	0.399634	-5.37092	7.83357e-08	2.3152e-05
MGP_BALBcJ_G0035404__Csrnp1	361.237	-1.71587	0.320579	-5.35242	8.6788e-08	2.51568e-05
MGP_BALBcJ_G0020430__Gcnt2	827.463	-1.62429	0.303804	-5.34649	8.96738e-08	2.55029e-05
MGP_BALBcJ_G0017796__Il23a	39.2174	-3.74332	0.704158	-5.31602	1.06062e-07	2.96049e-05
MGP_BALBcJ_G0027061__Cyp7b1	53.7148	-2.45125	0.461637	-5.3099	1.09685e-07	3.00597e-05
MGP_BALBcJ_G0019688__Nfkbia	1163.87	-1.10165	0.207958	-5.29745	1.17428e-07	3.16071e-05
MGP_BALBcJ_G0017922__Lif	1181.32	-1.78167	0.33802	-5.2709	1.35756e-07	3.52801e-05
MGP_BALBcJ_G0031497__Nlrp12	19.7935	-7.74202	1.46851	-5.27201	1.34935e-07	3.52801e-05
MGP_BALBcJ_G0028546__Kti12	301.909	-0.832721	0.158366	-5.2582	1.45471e-07	3.71641e-05
MGP_BALBcJ_G0034540__Siae	472.42	0.766635	0.146453	5.23468	1.65275e-07	4.15198e-05
MGP_BALBcJ_G0027654__Ngf	41.8827	-3.31089	0.634095	-5.22144	1.77533e-07	4.38682e-05
MGP_BALBcJ_G0018504__Kctd11	449.41	-1.03393	0.199594	-5.18017	2.21687e-07	5.38949e-05
MGP_BALBcJ_G0023365__Dusp1	681.588	-1.9795	0.38641	-5.1228	3.01034e-07	7.19059e-05
MGP_BALBcJ_G0025118__Loxl4	58.277	-1.93623	0.37816	-5.12014	3.05313e-07	7.19059e-05
MGP_BALBcJ_G0019822__Zfp36l1	2255.62	-0.853294	0.1668	-5.11567	3.12624e-07	7.24952e-05
MGP_BALBcJ_G0020445__Phactr1	328.54	0.953559	0.18681	5.10443	3.31785e-07	7.57726e-05
MGP_BALBcJ_G0016979__Tnfaip3	316.939	-2.02906	0.398348	-5.09367	3.51194e-07	7.90081e-05
MGP_BALBcJ_G0028749__Csf3r	480.211	-3.6254	0.71508	-5.06992	3.97974e-07	8.6947e-05
MGP_BALBcJ_G0036239__Arhgap6	466.935	0.715244	0.141077	5.0699	3.98019e-07	8.6947e-05
MGP_BALBcJ_G0016666__Uap1	1708.16	-0.486845	0.0963048	-5.05525	4.29819e-07	9.17833e-05
MGP_BALBcJ_G0031222__Clec4d	317.134	-5.88672	1.16473	-5.05414	4.32337e-07	9.17833e-05
MGP_BALBcJ_G0004060__Gm26756	34.0946	-4.14168	0.821093	-5.04411	4.55627e-07	9.53843e-05
MGP_BALBcJ_G0019283__Abca8a	623.297	1.36502	0.271351	5.03045	4.8933e-07	0.000101037
MGP_BALBcJ_G0031184__Il17ra	1062.6	-0.709221	0.141468	-5.01331	5.35021e-07	0.000108978
MGP_BALBcJ_G0026951__Sycp2	25.2994	-3.36378	0.672587	-5.00126	5.69573e-07	0.000114469
MGP_BALBcJ_G0018904__Lrrc59	5374.05	-0.47148	0.0943886	-4.9951	5.88066e-07	0.00011663
MGP_BALBcJ_G0015907__Il18rap	140.904	-3.89708	0.781576	-4.98618	6.15833e-07	0.000119006
MGP_BALBcJ_G0035107__Chst2	321.72	-1.88984	0.37891	-4.98757	6.1144e-07	0.000119006
MGP_BALBcJ_G0031782__Pvr	807.804	-0.941525	0.189034	-4.98071	6.33507e-07	0.000120871
MGP_BALBcJ_G0021511__Dmtn	305.459	0.879198	0.177283	4.95928	7.07536e-07	0.000130362
MGP_BALBcJ_G0028314__Ugcg	1328.46	-0.617297	0.124484	-4.95883	7.09196e-07	0.000130362
MGP_BALBcJ_G0031327__Olr1	67.7542	-5.16006	1.0401	-4.96111	7.00926e-07	0.000130362
MGP_BALBcJ_G0033054__NA	243.821	-1.70369	0.345172	-4.93576	7.98386e-07	0.000144989
MGP_BALBcJ_G0017403__Ptbp1	6579.2	-0.362358	0.0736648	-4.91902	8.69789e-07	0.000156075
MGP_BALBcJ_G0015878__2010300C02Rik	631.479	0.768591	0.157002	4.89541	9.8101e-07	0.00017325
MGP_BALBcJ_G0016706__Cd244	58.182	-1.93928	0.396264	-4.89392	9.88489e-07	0.00017325
MGP_BALBcJ_G0023959__Tgif1	1755.25	-1.22941	0.25134	-4.89142	1.00111e-06	0.000173445
MGP_BALBcJ_G0031814__Plaur	383.54	-2.7894	0.570886	-4.88609	1.02857e-06	0.000176178
MGP_BALBcJ_G0000388__NA	15.9981	-7.46636	1.53024	-4.87921	1.06512e-06	0.000178937
MGP_BALBcJ_G0026932__Pmepa1	3863.34	-1.29697	0.265849	-4.8786	1.06842e-06	0.000178937
MGP_BALBcJ_G0035581__Klhl13	743.702	0.564607	0.115811	4.87522	1.08686e-06	0.000180024
MGP_BALBcJ_G0005814__Mirt1	248.528	-3.49597	0.717779	-4.87054	1.11295e-06	0.000182343
MGP_BALBcJ_G0028757__Map7d1	1949.02	-0.589199	0.121368	-4.85464	1.20603e-06	0.000195468
MGP_BALBcJ_G0032931__Usp31	876.861	-0.670245	0.138127	-4.85238	1.21991e-06	0.000195613
MGP_BALBcJ_G0029260__Steap4	2624.44	-1.26165	0.261297	-4.82839	1.37639e-06	0.000217815
MGP_BALBcJ_G0031223__Clec4e	297.325	-5.21062	1.07951	-4.82683	1.38727e-06	0.000217815
MGP_BALBcJ_G0033140__Adam8	706.927	-3.51296	0.729314	-4.8168	1.45877e-06	0.00022668
MGP_BALBcJ_G0026910__Bcas1	47.4785	1.46704	0.305829	4.79694	1.61109e-06	0.000247796
MGP_BALBcJ_G0017792__Timeless	285.714	-0.823014	0.171857	-4.78893	1.67672e-06	0.000255284
MGP_BALBcJ_G0017469__Gadd45b	244.235	-1.81847	0.381356	-4.76843	1.85667e-06	0.000279244
MGP_BALBcJ_G0028249__Nr4a3	180.737	-3.85925	0.8096	-4.76687	1.87114e-06	0.000279244
MGP_BALBcJ_G0022414__Mefv	94.5062	-4.91756	1.03307	-4.76012	1.93474e-06	0.00028313
MGP_BALBcJ_G0031071__Chl1	100.391	-2.69951	0.566906	-4.76183	1.91845e-06	0.00028313
MGP_BALBcJ_G0018796__Ccl3	137.577	-4.19828	0.886049	-4.7382	2.15622e-06	0.00030953
MGP_BALBcJ_G0026859__Mmp9	126.618	-2.27992	0.481128	-4.73869	2.151e-06	0.00030953
MGP_BALBcJ_G0027164__Slc7a11	478.362	-3.30083	0.69782	-4.73021	2.2429e-06	0.000318936
MGP_BALBcJ_G0030376__Mtus2	31.1183	3.031	0.644253	4.70467	2.54283e-06	0.00035382
MGP_BALBcJ_G0030377__Slc7a1	546.303	-1.08194	0.230033	-4.7034	2.55864e-06	0.00035382
MGP_BALBcJ_G0031927__Zfp36	2073.49	-1.17732	0.250238	-4.70483	2.54082e-06	0.00035382
MGP_BALBcJ_G0005113__4732465J04Rik	13.589	-7.17505	1.5281	-4.6954	2.66083e-06	0.000364606
MGP_BALBcJ_G0028230__Tmod1	40.1814	1.66908	0.355755	4.69167	2.70987e-06	0.000366044
MGP_BALBcJ_G0034115__Znrf1	2271.29	-0.620725	0.132325	-4.69091	2.71989e-06	0.000366044
MGP_BALBcJ_G0024236__Tmem173	1535.64	-0.548686	0.117017	-4.68895	2.74604e-06	0.000366293
MGP_BALBcJ_G0022064__Atf4	4697.7	-0.565877	0.120748	-4.68642	2.78027e-06	0.0003676
MGP_BALBcJ_G0029707__Cxcl1	433.626	-1.35805	0.289894	-4.68463	2.80462e-06	0.0003676
MGP_BALBcJ_G0022844__Cblb	860.227	-0.790447	0.169409	-4.66592	3.07246e-06	0.000399235
MGP_BALBcJ_G0005815__4833407H14Rik	26.3378	-2.59777	0.558179	-4.654	3.25553e-06	0.000419406
MGP_BALBcJ_G0034019__Lrrc36	25.5973	1.92074	0.413634	4.64357	3.42444e-06	0.000437429
MGP_BALBcJ_G0027299__Gucy1a3	206.214	0.919691	0.198452	4.63432	3.58106e-06	0.000453591
MGP_BALBcJ_G0016374__Cxcr4	300.56	-3.15468	0.682295	-4.62363	3.77085e-06	0.000463539
MGP_BALBcJ_G0023617__Ppp1r18	712.017	-0.924625	0.200006	-4.62298	3.78261e-06	0.000463539
MGP_BALBcJ_G0025174__Nfkb2	1239.38	-0.888836	0.192201	-4.62452	3.75465e-06	0.000463539
MGP_BALBcJ_G0033262__NA	155.361	-2.03661	0.440221	-4.62633	3.722e-06	0.000463539
MGP_BALBcJ_G0023876__Sema6b	261.111	-0.954302	0.206662	-4.6177	3.88014e-06	0.000471656
MGP_BALBcJ_G0020192__Inhba	27.3354	-4.12149	0.894206	-4.60911	4.04406e-06	0.00047932
MGP_BALBcJ_G0021852__Trib1	1836.37	-1.21189	0.263075	-4.60665	4.092e-06	0.00047932
MGP_BALBcJ_G0024332__Spry4	145.483	-0.935459	0.203042	-4.60722	4.08084e-06	0.00047932
MGP_BALBcJ_G0032040__Fxyd5	876.102	-1.62202	0.351847	-4.61003	4.0262e-06	0.00047932
MGP_BALBcJ_G0032881__Xylt1	187.592	-2.11533	0.459241	-4.60614	4.10219e-06	0.00047932
MGP_BALBcJ_G0025720__Acvr1	849.73	-0.746953	0.162784	-4.58862	4.46184e-06	0.000509495
MGP_BALBcJ_G0028670__Slc2a1	2076.24	-0.870515	0.189688	-4.58919	4.44967e-06	0.000509495
MGP_BALBcJ_G0030194__Serpine1	419.418	-2.01414	0.438902	-4.58906	4.45253e-06	0.000509495
MGP_BALBcJ_G0017008__Slc2a12	140.389	1.4528	0.316836	4.58532	4.53283e-06	0.00051371
MGP_BALBcJ_G0022367__Soat2	42.3481	-3.44162	0.751143	-4.58185	4.60887e-06	0.000514589
MGP_BALBcJ_G0028224__Shb	293.346	-0.789362	0.172256	-4.58251	4.59434e-06	0.000514589
MGP_BALBcJ_G0005912__Gm14396	13.3971	3.82542	0.838505	4.56219	5.06238e-06	0.000561068
MGP_BALBcJ_G0025169__Pprc1	1521.35	-0.899826	0.197541	-4.55514	5.23502e-06	0.000573112
MGP_BALBcJ_G0027165__Noct	610.159	-1.72433	0.378586	-4.55466	5.24709e-06	0.000573112
MGP_BALBcJ_G0017015__Vnn1	18.0999	2.51782	0.553775	4.54665	5.45072e-06	0.000590249
MGP_BALBcJ_G0033491__Mak16	773.254	-0.625716	0.137658	-4.54543	5.48231e-06	0.000590249
MGP_BALBcJ_G0028627__Plk3	608.195	-1.52726	0.336277	-4.54166	5.58132e-06	0.000596647
MGP_BALBcJ_G0022402__Nfe2	19.2949	-4.19786	0.925707	-4.53476	5.76697e-06	0.000612152
MGP_BALBcJ_G0026507__Smox	2182.3	-1.49951	0.331021	-4.52997	5.89931e-06	0.00062182
MGP_BALBcJ_G0034404__Icam1	739.403	-1.3921	0.307907	-4.52117	6.14976e-06	0.000643718
MGP_BALBcJ_G0026891__Snai1	102.2	-1.58479	0.350739	-4.51845	6.22945e-06	0.000647562
MGP_BALBcJ_G0021068__Gnl3	1017.49	-1.04063	0.230553	-4.51365	6.37226e-06	0.00065787
MGP_BALBcJ_G0018780__Slfn1	71.2818	-2.6997	0.598861	-4.50806	6.54241e-06	0.000670842
MGP_BALBcJ_G0034284__Casp4	482.591	-0.871151	0.19332	-4.50626	6.59816e-06	0.000671987
MGP_BALBcJ_G0022058__Pdgfb	729.712	-1.06801	0.237133	-4.50384	6.67369e-06	0.000675117
MGP_BALBcJ_G0030056__Hcar2	380.551	-3.88595	0.86379	-4.49873	6.83613e-06	0.000686939
MGP_BALBcJ_G0017896__Pik3ip1	697.513	1.15924	0.257874	4.49537	6.94506e-06	0.000688703
MGP_BALBcJ_G0024410__Lmnb1	508.064	-1.68597	0.374977	-4.49618	6.91851e-06	0.000688703
MGP_BALBcJ_G0025581__Slc25a25	328.703	-1.10874	0.246746	-4.49344	7.00813e-06	0.000690416
MGP_BALBcJ_G0031956__Rasgrp4	136.096	-1.78381	0.398314	-4.47839	7.52079e-06	0.00073611
MGP_BALBcJ_G0023415__4930539E08Rik	767.313	0.847262	0.189451	4.47221	7.74163e-06	0.00074801
MGP_BALBcJ_G0031944__Nfkbib	571.387	-0.612747	0.136986	-4.47305	7.71113e-06	0.00074801
MGP_BALBcJ_G0020079__Trmt61a	234.782	-1.17489	0.263034	-4.46668	7.9442e-06	0.000757867
MGP_BALBcJ_G0029290__Ptpn12	1656.46	-0.753995	0.16878	-4.46733	7.92008e-06	0.000757867
MGP_BALBcJ_G0025381__Il1rn	954.935	-4.88727	1.09496	-4.46344	8.06543e-06	0.000763018
MGP_BALBcJ_G0027056__NA	32.2688	-3.04641	0.682663	-4.46254	8.09945e-06	0.000763018
MGP_BALBcJ_G0031401__Emp1	3430.5	-1.63857	0.367494	-4.45876	8.24337e-06	0.000771753
MGP_BALBcJ_G0034292__Mmp3	2350.53	-1.49188	0.334789	-4.45619	8.34292e-06	0.000776252
MGP_BALBcJ_G0017152__Lilrb4a	726.033	-2.81674	0.632725	-4.45176	8.51706e-06	0.00078279
MGP_BALBcJ_G0032372__Aen	1214.04	-0.692446	0.155534	-4.45205	8.50525e-06	0.00078279
MGP_BALBcJ_G0029705__Cxcl3	55.395	-6.28711	1.4133	-4.44855	8.64536e-06	0.000789767
MGP_BALBcJ_G0016999__Sgk1	1493.93	-1.00415	0.226107	-4.44105	8.9519e-06	0.000812844
MGP_BALBcJ_G0034665__Mcam	1023.49	-0.568966	0.128338	-4.43335	9.27817e-06	0.000837424
MGP_BALBcJ_G0024244__Hbegf	194.552	-2.20917	0.498877	-4.4283	9.49805e-06	0.000852168
MGP_BALBcJ_G0022582__38596	262.971	-1.34449	0.303803	-4.42554	9.62019e-06	0.000858019
MGP_BALBcJ_G0032241__Grwd1	282.426	-0.999914	0.226141	-4.42164	9.7955e-06	0.000868515
MGP_BALBcJ_G0023126__Sod2	2189.57	-0.840345	0.190154	-4.41929	9.90256e-06	0.000872137
MGP_BALBcJ_G0028091__Pnrc1	2063.34	-0.344391	0.0779481	-4.41821	9.95207e-06	0.000872137
MGP_BALBcJ_G0029764__Plac8	234.959	-1.78078	0.403496	-4.41337	1.01775e-05	0.00088674
MGP_BALBcJ_G0030907__Mthfd2	95.1531	-2.04664	0.464197	-4.40899	1.03855e-05	0.000899661
MGP_BALBcJ_G0018530__Alox12	44.8759	2.85607	0.648306	4.40544	1.05571e-05	0.000904128
MGP_BALBcJ_G0022753__Stfa2l1	13.4221	-7.15629	1.62438	-4.40556	1.05513e-05	0.000904128
MGP_BALBcJ_G0024672__Fosl1	71.8758	-3.47103	0.788439	-4.40241	1.07057e-05	0.000911676
MGP_BALBcJ_G0033186__Ifitm2	639.872	-0.820239	0.186418	-4.39999	1.08254e-05	0.00091669
MGP_BALBcJ_G0024703__Syvn1	2373.97	-0.61843	0.140666	-4.39644	1.10041e-05	0.000926618
MGP_BALBcJ_G0014281__NA	664.576	-1.16323	0.265096	-4.38796	1.14417e-05	0.000958119
MGP_BALBcJ_G0007292__Gm9951	26.212	-1.65561	0.377523	-4.38545	1.15744e-05	0.000963873
MGP_BALBcJ_G0021856__Myc	745.775	-1.28007	0.292173	-4.3812	1.18025e-05	0.000977467
MGP_BALBcJ_G0000066__Ighv9-4	39.8666	-2.82245	0.645631	-4.37161	1.23333e-05	0.00101102
MGP_BALBcJ_G0034074__Nob1	505.881	-0.589443	0.134839	-4.37146	1.23418e-05	0.00101102
MGP_BALBcJ_G0021398__C1qtnf9	241.6	1.17515	0.268988	4.36876	1.24953e-05	0.00101806
MGP_BALBcJ_G0016551__Ier5	1692.02	-0.690786	0.158208	-4.36632	1.26356e-05	0.00102396
MGP_BALBcJ_G0017238__Srgn	1224.86	-2.66228	0.610167	-4.3632	1.28176e-05	0.0010309
MGP_BALBcJ_G0023151__Fpr1	48.2593	-3.67997	0.843545	-4.36251	1.28581e-05	0.0010309
MGP_BALBcJ_G0024654__Rin1	271.084	-1.13102	0.259328	-4.36135	1.29265e-05	0.0010309
MGP_BALBcJ_G0031827__Cd177	48.7015	-2.38351	0.546708	-4.35975	1.30208e-05	0.00103296
MGP_BALBcJ_G0034011__E2f4	875.559	-0.536832	0.123264	-4.35513	1.32988e-05	0.00104949
MGP_BALBcJ_G0027641__Vtcn1	2005.97	0.561765	0.129053	4.35299	1.34293e-05	0.00105427
MGP_BALBcJ_G0015065__A330023F24Rik	256.937	1.19218	0.273976	4.3514	1.35271e-05	0.00105644
MGP_BALBcJ_G0034857__Stra6	53.4955	3.61048	0.83002	4.34987	1.3622e-05	0.00105837
MGP_BALBcJ_G0026872__Eya2	1437.84	0.480769	0.110635	4.34554	1.38931e-05	0.0010739
MGP_BALBcJ_G0028923__Clic4	4017.57	-0.87682	0.201848	-4.34395	1.39942e-05	0.00107619
MGP_BALBcJ_G0029981__Tpcn1	2578.99	0.789176	0.18205	4.33494	1.45798e-05	0.00111554
MGP_BALBcJ_G0016007__Nop58	994.487	-1.02373	0.23655	-4.32774	1.50648e-05	0.00114683
MGP_BALBcJ_G0023825__NA	24.8147	-3.88943	0.899985	-4.32166	1.54859e-05	0.00117296
MGP_BALBcJ_G0022406__Itga5	837.447	-1.19011	0.275627	-4.31785	1.57556e-05	0.00118742
MGP_BALBcJ_G0034820__Pstpip1	117.903	-1.8247	0.422916	-4.31458	1.5991e-05	0.00119917
MGP_BALBcJ_G0031264__Nop2	428.297	-0.750491	0.174155	-4.30933	1.6375e-05	0.00122188
MGP_BALBcJ_G0032169__Atf5	1217.13	-0.737772	0.17125	-4.30816	1.64619e-05	0.00122232
MGP_BALBcJ_G0035892__Msn	4409.78	-1.28707	0.298835	-4.30694	1.65527e-05	0.00122303
MGP_BALBcJ_G0022993__Tiam1	471.494	-0.564243	0.131167	-4.3017	1.6949e-05	0.00124621
MGP_BALBcJ_G0021903__Ly6d	75.7135	3.04867	0.70892	4.30044	1.70457e-05	0.00124723
MGP_BALBcJ_G0006839__5930430L01Rik	195.554	0.665529	0.15489	4.29679	1.73286e-05	0.00126181
MGP_BALBcJ_G0019406__Usp36	1044.43	-0.502248	0.116959	-4.29423	1.753e-05	0.00127034
MGP_BALBcJ_G0027859__Sgms2	367.197	-1.6536	0.385632	-4.28803	1.80263e-05	0.00130005
MGP_BALBcJ_G0032259__Saa3	833.555	-1.68869	0.394566	-4.27987	1.87003e-05	0.00134224
MGP_BALBcJ_G0025181__Trim8	1494.13	-0.539628	0.126154	-4.27755	1.88965e-05	0.00134989
MGP_BALBcJ_G0024489__Tubb6	942.885	-1.33052	0.311651	-4.26927	1.96113e-05	0.0013878
MGP_BALBcJ_G0029101__Fbxo44	433.826	0.634932	0.148711	4.26956	1.9586e-05	0.0013878
MGP_BALBcJ_G0024186__Lims2	379.948	0.646058	0.151672	4.25956	2.04826e-05	0.00144268
MGP_BALBcJ_G0028883__Sfn	707.742	-1.50862	0.354716	-4.25302	2.10908e-05	0.00147861
MGP_BALBcJ_G0016322__Serpinb2	110.697	-5.01927	1.18191	-4.24675	2.16896e-05	0.0014952
MGP_BALBcJ_G0016744__Ackr1	107.784	-1.13977	0.268438	-4.24594	2.17677e-05	0.0014952
MGP_BALBcJ_G0016952__Stx11	93.2842	-2.74324	0.645847	-4.24751	2.16162e-05	0.0014952
MGP_BALBcJ_G0021374__Lats2	921.295	-0.421022	0.0991959	-4.24435	2.19225e-05	0.0014952
MGP_BALBcJ_G0022355__Krt1	120.316	9.24795	2.17751	4.24703	2.16621e-05	0.0014952
MGP_BALBcJ_G0030183__Sh2b2	204.684	-1.45268	0.342228	-4.24476	2.18823e-05	0.0014952
MGP_BALBcJ_G0020439__Nedd9	2578.84	-1.33869	0.315588	-4.2419	2.21636e-05	0.00150483
MGP_BALBcJ_G0012156__NA	241.344	-0.962313	0.227288	-4.23389	2.29684e-05	0.00155248
MGP_BALBcJ_G0022682__Fam43a	705.226	-0.93564	0.221186	-4.23012	2.33572e-05	0.00157171
MGP_BALBcJ_G0017390__Madcam1	108.67	-1.51554	0.358419	-4.22839	2.3537e-05	0.00157677
MGP_BALBcJ_G0022636__Dgkg	11.3279	-3.47745	0.82297	-4.22549	2.38425e-05	0.00159017
MGP_BALBcJ_G0032519__Capn5	1072.31	0.742592	0.17579	4.22432	2.39667e-05	0.00159141
MGP_BALBcJ_G0020970__Nr1d2	1501.87	0.961504	0.228169	4.214	2.50883e-05	0.00165858
MGP_BALBcJ_G0029108__Srm	639.253	-0.838667	0.199232	-4.20951	2.55928e-05	0.00168454
MGP_BALBcJ_G0029723__Sdad1	676.258	-0.62328	0.148209	-4.20541	2.60604e-05	0.00170786
MGP_BALBcJ_G0000047__Ighv5-15	42.6375	2.77096	0.661788	4.18709	2.8256e-05	0.00184373
MGP_BALBcJ_G0032488__Picalm	3197.87	-0.695445	0.166195	-4.18452	2.85765e-05	0.00185661
MGP_BALBcJ_G0023753__Nfkbie	310.472	-1.49466	0.357473	-4.18118	2.90006e-05	0.00187608
MGP_BALBcJ_G0017629__Dusp6	950.577	-1.07766	0.257965	-4.17753	2.94691e-05	0.00188215
MGP_BALBcJ_G0030325__Aimp2	372.1	-0.536857	0.128476	-4.17865	2.9325e-05	0.00188215
MGP_BALBcJ_G0034068__Nip7	555.341	-0.615778	0.147391	-4.17785	2.94272e-05	0.00188215
MGP_BALBcJ_G0028137__Cntfr	237.047	-1.4202	0.340175	-4.17491	2.9811e-05	0.00189004
MGP_BALBcJ_G0028793__Rnf19b	1101.16	-0.860914	0.206224	-4.17466	2.98434e-05	0.00189004
MGP_BALBcJ_G0032943__Chp2	221.947	1.37095	0.328808	4.16946	3.05316e-05	0.00192553
MGP_BALBcJ_G0022404__Gpr84	14.7127	-3.57274	0.857334	-4.16727	3.08272e-05	0.00193608
MGP_BALBcJ_G0025674__Nek6	1191.65	-0.835091	0.200892	-4.15691	3.22582e-05	0.0020134
MGP_BALBcJ_G0028693__Ctps	1255.47	-0.863457	0.20774	-4.15643	3.23256e-05	0.0020134
MGP_BALBcJ_G0027990__Wls	3548.99	0.384559	0.0925982	4.15298	3.28167e-05	0.00202467
MGP_BALBcJ_G0029050__Pdpn	428.993	-1.78064	0.428763	-4.15296	3.28207e-05	0.00202467
MGP_BALBcJ_G0032232__Dbp	172.419	2.24633	0.540979	4.15234	3.29094e-05	0.00202467
MGP_BALBcJ_G0016486__Zfp281	779.16	-0.672113	0.161973	-4.14952	3.33167e-05	0.00204139
MGP_BALBcJ_G0021075__Sema3g	528.615	0.406238	0.0980179	4.14453	3.40511e-05	0.00207794
MGP_BALBcJ_G0035463__Ccr1	445.798	-2.42765	0.586054	-4.14237	3.43737e-05	0.00208917
MGP_BALBcJ_G0015995__Cflar	3238.21	-0.404868	0.0981172	-4.12637	3.6853e-05	0.00223087
MGP_BALBcJ_G0016424__Plekha6	3035.04	0.423001	0.102673	4.11989	3.79058e-05	0.00228301
MGP_BALBcJ_G0029142__Per3	909.991	1.50004	0.364156	4.11921	3.80173e-05	0.00228301
MGP_BALBcJ_G0017830__Itga7	410.822	-0.86092	0.209419	-4.111	3.93955e-05	0.00235638
MGP_BALBcJ_G0017351__Trpm2	233.345	-1.5373	0.374352	-4.10657	4.0158e-05	0.00239249
MGP_BALBcJ_G0033260__Tnfrsf26	47.3232	-2.16201	0.526841	-4.10372	4.06558e-05	0.00241262
MGP_BALBcJ_G0035746__Ids	1599.81	0.409134	0.0997254	4.10261	4.08523e-05	0.00241477
MGP_BALBcJ_G0029026__Epha2	485.606	-1.27689	0.311879	-4.09419	4.2365e-05	0.0024944
MGP_BALBcJ_G0016892__Sertad4	1031.88	-0.834605	0.204	-4.09119	4.29166e-05	0.00251705
MGP_BALBcJ_G0018797__Ccl4	88.3767	-4.06053	0.993202	-4.08832	4.34502e-05	0.00253795
MGP_BALBcJ_G0023827__Trem3	12.5163	-6.17029	1.50956	-4.08747	4.36097e-05	0.00253795
MGP_BALBcJ_G0028206__Glipr2	379.668	-1.04075	0.255117	-4.0795	4.51335e-05	0.00261653
MGP_BALBcJ_G0017593__Hal	433.827	-1.65998	0.407262	-4.07594	4.58285e-05	0.00262652
MGP_BALBcJ_G0019285__Abca6	119.063	1.65279	0.405479	4.07614	4.57896e-05	0.00262652
MGP_BALBcJ_G0032029__Krtdap	15.6142	7.08297	1.73758	4.07635	4.57473e-05	0.00262652
MGP_BALBcJ_G0033620__Cpe	825.807	-0.669504	0.164403	-4.07233	4.65457e-05	0.00265751
MGP_BALBcJ_G0021698__Tars	1396.54	-0.465838	0.114493	-4.0687	4.72767e-05	0.00267895
MGP_BALBcJ_G0028566__Skint2	118.556	1.42167	0.34936	4.06935	4.71439e-05	0.00267895
MGP_BALBcJ_G0016025__Gpr1	57.1114	1.07301	0.263784	4.06776	4.74675e-05	0.00267969
MGP_BALBcJ_G0003836__NA	17.1293	-2.56808	0.632136	-4.06255	4.85401e-05	0.00270064
MGP_BALBcJ_G0004701__F630028O10Rik	97.4282	-1.83785	0.452191	-4.06432	4.8173e-05	0.00270064
MGP_BALBcJ_G0021602__Spry2	428.463	-0.579637	0.142655	-4.06322	4.84003e-05	0.00270064
MGP_BALBcJ_G0026969__Slco4a1	51.7983	-1.3723	0.337799	-4.06247	4.85552e-05	0.00270064
MGP_BALBcJ_G0024137__Dsc3	23.083	5.22242	1.28626	4.06018	4.90355e-05	0.00271732
MGP_BALBcJ_G0029501__Fbxl5	1254.73	-1.06553	0.262506	-4.05907	4.92676e-05	0.00272019
MGP_BALBcJ_G0032550__Pgm2l1	731.494	0.527463	0.130084	4.05479	5.01792e-05	0.00276041
MGP_BALBcJ_G0024611__Cdk2ap2	836.167	-0.650267	0.160406	-4.05389	5.03729e-05	0.00276098
MGP_BALBcJ_G0018087__Gabrp	64.7726	1.9869	0.490505	4.05073	5.10585e-05	0.00278842
MGP_BALBcJ_G0024531__Smad7	210.968	-1.19145	0.294201	-4.0498	5.12624e-05	0.00278945
MGP_BALBcJ_G0025886__Rtn4rl2	25.7031	-2.21885	0.548461	-4.04559	5.21926e-05	0.00282985
MGP_BALBcJ_G0025837__Osbpl6	58.5822	1.25347	0.310011	4.04331	5.27016e-05	0.00284721
MGP_BALBcJ_G0029533__Tbc1d19	375.819	0.467276	0.11561	4.04182	5.30368e-05	0.00285509
MGP_BALBcJ_G0025366__Pdss1	94.0525	-0.755661	0.187303	-4.03443	5.47343e-05	0.00293598
MGP_BALBcJ_G0024823__Vps37c	875.724	-0.507676	0.125863	-4.03358	5.49344e-05	0.00293626
MGP_BALBcJ_G0034302__Birc3	1138.59	-0.792231	0.196708	-4.02744	5.63866e-05	0.00300324
MGP_BALBcJ_G0025376__Il1f9	351.558	-1.88743	0.46899	-4.02446	5.71066e-05	0.00302633
MGP_BALBcJ_G0033259__Cars	1356.31	-0.323098	0.0802929	-4.02398	5.72218e-05	0.00302633
MGP_BALBcJ_G0020550__Pdlim7	796.909	-0.71885	0.17875	-4.02154	5.78181e-05	0.00304718
MGP_BALBcJ_G0029624__C530008M17Rik	18.9829	1.71431	0.426465	4.01982	5.82416e-05	0.0030588
MGP_BALBcJ_G0025593__Sh2d3c	439.941	-1.53217	0.381592	-4.01522	5.93911e-05	0.00310318
MGP_BALBcJ_G0031221__Clec4n	158.794	-3.40899	0.849108	-4.01479	5.94985e-05	0.00310318
MGP_BALBcJ_G0031385__Bcl2l14	66.95	1.2777	0.3184	4.01286	5.99868e-05	0.00311787
MGP_BALBcJ_G0027561__Mcl1	5782.51	-0.570089	0.142255	-4.00752	6.13601e-05	0.00317638
MGP_BALBcJ_G0035428__Ccdc13	111.74	1.04384	0.260513	4.00685	6.1534e-05	0.00317638
MGP_BALBcJ_G0017981__Upp1	125.094	-1.40771	0.351656	-4.00309	6.25193e-05	0.00321622
MGP_BALBcJ_G0033525__Msr1	544.003	-2.80993	0.702154	-4.00187	6.28438e-05	0.00322192
MGP_BALBcJ_G0034965__Anxa2	3661.78	-1.09234	0.273229	-3.99788	6.3912e-05	0.00326558
MGP_BALBcJ_G0018580__Mybbp1a	2423.41	-0.662592	0.166025	-3.99093	6.58151e-05	0.00335146
MGP_BALBcJ_G0017526__Chst11	829.971	-1.42151	0.356573	-3.98659	6.70287e-05	0.00339035
MGP_BALBcJ_G0020169__Heatr1	904.101	-0.969736	0.24322	-3.98706	6.68958e-05	0.00339035
MGP_BALBcJ_G0033334__Rab20	467.396	-1.04333	0.261833	-3.98472	6.75584e-05	0.00340571
MGP_BALBcJ_G0027046__Lrrcc1	452.656	0.613245	0.154014	3.98175	6.84089e-05	0.00343709
MGP_BALBcJ_G0026219__Muc15	33284.5	0.878964	0.220819	3.98048	6.87762e-05	0.00344406
MGP_BALBcJ_G0016874__Tatdn3	188.132	0.813559	0.204614	3.97606	7.00661e-05	0.0034855
MGP_BALBcJ_G0021333__Ltb4r1	38.7125	-1.99456	0.501592	-3.97646	6.99477e-05	0.0034855
MGP_BALBcJ_G0019402__Socs3	2408.27	-1.13528	0.286128	-3.96772	7.25624e-05	0.00356265
MGP_BALBcJ_G0020880__Plk2	713.397	-0.781216	0.196868	-3.96823	7.24094e-05	0.00356265
MGP_BALBcJ_G0024699__Cdc42ep2	161.636	-0.914822	0.230511	-3.96867	7.22743e-05	0.00356265
MGP_BALBcJ_G0033898__Nod2	150.936	-0.742956	0.187189	-3.96901	7.21718e-05	0.00356265
MGP_BALBcJ_G0020401__Pxdc1	223.581	-1.1289	0.285554	-3.95337	7.7058e-05	0.00377109
MGP_BALBcJ_G0019033__Krt10	174.53	3.27247	0.828543	3.94966	7.82611e-05	0.00381757
MGP_BALBcJ_G0024826__Slc15a3	428.985	-2.86615	0.72582	-3.94885	7.85286e-05	0.00381827
MGP_BALBcJ_G0022235__Slc38a1	285.05	-1.93148	0.489506	-3.94577	7.9544e-05	0.00384926
MGP_BALBcJ_G0028747__Zc3h12a	480.411	-0.796496	0.201881	-3.94537	7.96769e-05	0.00384926
MGP_BALBcJ_G0018549__Pfn1	6390.54	-0.37643	0.0954454	-3.94393	8.01566e-05	0.00385
MGP_BALBcJ_G0019734__Arf6	2821.57	-0.475378	0.120568	-3.94284	8.05223e-05	0.00385
MGP_BALBcJ_G0031768__Relb	524.33	-1.00252	0.254301	-3.94227	8.07139e-05	0.00385
MGP_BALBcJ_G0033860__Junb	1908.73	-1.1692	0.296569	-3.94243	8.06598e-05	0.00385
MGP_BALBcJ_G0023648__Trim15	40.0996	-2.19859	0.557895	-3.94087	8.11882e-05	0.00386041
MGP_BALBcJ_G0019460__Mafg	2919.55	-0.385902	0.0979831	-3.93845	8.20091e-05	0.00386288
MGP_BALBcJ_G0024723__Ehd1	1761.32	-0.607759	0.154308	-3.93861	8.19542e-05	0.00386288
MGP_BALBcJ_G0025879__Ypel4	17.6825	2.43742	0.618762	3.93918	8.17589e-05	0.00386288
MGP_BALBcJ_G0026473__NA	1005.23	-0.938065	0.238308	-3.93635	8.27309e-05	0.00388309
MGP_BALBcJ_G0032219__Ppp1r15a	741.145	-0.876733	0.222764	-3.9357	8.29534e-05	0.00388309
MGP_BALBcJ_G0015030__Gm15832	220.259	-0.684717	0.174029	-3.93449	8.3372e-05	0.00389061
MGP_BALBcJ_G0021036__Pde12	497.821	-0.479644	0.122019	-3.93088	8.4634e-05	0.00393392
MGP_BALBcJ_G0035075__Nt5e	289.025	-1.18004	0.300238	-3.93035	8.48221e-05	0.00393392
MGP_BALBcJ_G0022925__Samsn1	121.202	-3.34758	0.852701	-3.92586	8.64214e-05	0.0039958
MGP_BALBcJ_G0021099__Ercc6	605.205	-0.400827	0.102121	-3.92502	8.6722e-05	0.00399743
MGP_BALBcJ_G0029550__Wdr19	427.93	0.644618	0.164305	3.92331	8.73416e-05	0.00401372
MGP_BALBcJ_G0015941__Sdpr	1339.77	0.79671	0.203149	3.9218	8.78898e-05	0.0040165
MGP_BALBcJ_G0017919__Tbc1d10a	616.563	-0.586287	0.149527	-3.92095	8.82016e-05	0.0040165
MGP_BALBcJ_G0032393__Idh2	4435.43	0.476833	0.121601	3.9213	8.8073e-05	0.0040165
MGP_BALBcJ_G0032003__Nfkbid	122.757	-1.72543	0.440234	-3.91935	8.87892e-05	0.00403108
MGP_BALBcJ_G0027709__Cd53	724.796	-2.16933	0.553826	-3.917	8.9659e-05	0.00405835
MGP_BALBcJ_G0020331__Aldh5a1	431.649	0.699355	0.178589	3.916	9.00314e-05	0.004063
MGP_BALBcJ_G0019980__Tmem251	269.36	-0.639849	0.16349	-3.91368	9.09007e-05	0.00408999
MGP_BALBcJ_G0027439__Snapin	1038.61	0.397961	0.101764	3.91064	9.20526e-05	0.00412949
MGP_BALBcJ_G0027249__Ptx3	549.589	-3.88257	0.993826	-3.90669	9.35695e-05	0.00418508
MGP_BALBcJ_G0019276__Slc16a6	255.152	-1.55444	0.39845	-3.90121	9.57118e-05	0.00426824
MGP_BALBcJ_G0017329__Slc19a1	114.939	-0.772078	0.198008	-3.89922	9.65011e-05	0.00427812
MGP_BALBcJ_G0020499__S1pr3	122.454	-1.28924	0.330582	-3.8999	9.62323e-05	0.00427812
MGP_BALBcJ_G0023782__Srf	1046.25	-0.501117	0.128736	-3.89259	9.91787e-05	0.00438393
MGP_BALBcJ_G0035103__Plscr4	180.451	1.0369	0.266625	3.88898	0.000100665	0.00443664
MGP_BALBcJ_G0021885__Ago2	2563.48	-0.501109	0.129014	-3.88415	0.000102687	0.00451254
MGP_BALBcJ_G0028445__Cyp2j6	485.599	0.471483	0.121479	3.88118	0.000103952	0.00455486
MGP_BALBcJ_G0029702__Cxcl5	142.491	-5.01392	1.29234	-3.87974	0.000104568	0.00456856
MGP_BALBcJ_G0026758__Blcap	1545.34	-0.600996	0.154939	-3.87892	0.00010492	0.0045707
MGP_BALBcJ_G0023594__Tnf	87.5339	-1.69163	0.436443	-3.87595	0.00010621	0.00461354
MGP_BALBcJ_G0017099__Slc16a10	189.095	-0.848751	0.219054	-3.87462	0.000106791	0.00462545
MGP_BALBcJ_G0032886__Itpripl2	1291.31	-0.454366	0.117484	-3.86749	0.000109961	0.00473555
MGP_BALBcJ_G0033987__Car7	40.201	1.74059	0.450043	3.8676	0.000109912	0.00473555
MGP_BALBcJ_G0023076__NA	209.93	-0.817141	0.211774	-3.85856	0.000114058	0.004898
MGP_BALBcJ_G0035586__Il13ra1	991.524	-0.955555	0.247991	-3.85318	0.000116592	0.00499259
MGP_BALBcJ_G0016274__Sned1	1135.65	-0.821357	0.213223	-3.85211	0.000117105	0.00499905
MGP_BALBcJ_G0030382__Uspl1	636.043	-0.510336	0.132519	-3.85103	0.000117622	0.00499905
MGP_BALBcJ_G0035656__Xpnpep2	38.5983	-1.65863	0.430725	-3.85079	0.000117738	0.00499905
MGP_BALBcJ_G0027057__Gm5150	97.3225	-2.2946	0.596444	-3.84714	0.000119507	0.00501781
MGP_BALBcJ_G0034674__H2afx	205.721	-0.601118	0.156205	-3.84828	0.000118952	0.00501781
MGP_BALBcJ_G0035208__Rrp9	305.019	-0.766623	0.199202	-3.84846	0.000118862	0.00501781
MGP_BALBcJ_G0035393__Myd88	1642.15	-0.59094	0.153606	-3.84713	0.000119511	0.00501781
MGP_BALBcJ_G0018763__Ccl11	571.365	-0.964156	0.250716	-3.84561	0.000120252	0.0050214
MGP_BALBcJ_G0029291__Gsap	190.594	-1.52921	0.397654	-3.84559	0.000120263	0.0050214
MGP_BALBcJ_G0018440__Pik3r5	354.268	-1.54781	0.402805	-3.84258	0.000121749	0.00506938
MGP_BALBcJ_G0015752__Rgs20	334.581	-0.708427	0.18449	-3.83992	0.000123074	0.00511043
MGP_BALBcJ_G0018390__Adora2b	39.6399	-2.08153	0.54267	-3.83572	0.000125198	0.00518435
MGP_BALBcJ_G0034861__Stoml1	454.014	0.510041	0.13304	3.83375	0.000126204	0.0052117
MGP_BALBcJ_G0000096__Igkv1-132	17.1142	-5.54289	1.44873	-3.82602	0.000130229	0.00534974
MGP_BALBcJ_G0021354__Atp12a	227.952	1.27782	0.334043	3.8253	0.000130611	0.00534974
MGP_BALBcJ_G0032554__Ucp3	8290.09	0.910167	0.237917	3.82557	0.000130471	0.00534974
MGP_BALBcJ_G0025170__Nolc1	1159.81	-0.605011	0.158214	-3.82401	0.000131297	0.00536324
MGP_BALBcJ_G0020774__Homer1	483.203	-0.640151	0.16762	-3.81907	0.000133957	0.00545712
MGP_BALBcJ_G0016620__Sell	233.203	-4.65646	1.22062	-3.81482	0.000136282	0.00552409
MGP_BALBcJ_G0027566__Prpf3	625.455	-0.50034	0.13116	-3.81473	0.000136334	0.00552409
MGP_BALBcJ_G0019937__Dio2	175.896	-1.47035	0.385778	-3.8114	0.000138184	0.0055645
MGP_BALBcJ_G0028738__Yrdc	601.184	-0.386738	0.101448	-3.81219	0.000137741	0.0055645
MGP_BALBcJ_G0034399__Ppan	473.282	-0.77849	0.204278	-3.81094	0.000138439	0.0055645
MGP_BALBcJ_G0018641__Tsr1	1053.44	-0.763211	0.200544	-3.8057	0.000141406	0.00563995
MGP_BALBcJ_G0020020__Clmn	5332.91	0.378242	0.0993759	3.80617	0.000141135	0.00563995
MGP_BALBcJ_G0023628__NA	740.644	0.473558	0.124436	3.80564	0.000141438	0.00563995
MGP_BALBcJ_G0029701__Rassf6	770.326	0.719547	0.189112	3.80487	0.000141878	0.00564254
MGP_BALBcJ_G0019823__Actn1	3147.66	-0.803198	0.211191	-3.80319	0.000142847	0.00566577
MGP_BALBcJ_G0026151__NA	211.248	-2.04204	0.537018	-3.80255	0.000143214	0.00566577
MGP_BALBcJ_G0036197__Cdkl5	422.973	0.451221	0.118684	3.80185	0.000143618	0.00566688
MGP_BALBcJ_G0019306__Cd300lb	150.44	-2.08402	0.548661	-3.79837	0.000145651	0.00572399
MGP_BALBcJ_G0032747__Rrp8	471.611	-0.480708	0.126566	-3.79807	0.000145825	0.00572399
MGP_BALBcJ_G0020056__NA	43.3221	-1.79454	0.472841	-3.79522	0.000147512	0.00577519
MGP_BALBcJ_G0021944__Plec	4824.14	-0.61989	0.163448	-3.79258	0.00014909	0.00580732
MGP_BALBcJ_G0024070__Foxn2	735.947	-0.582188	0.153508	-3.79256	0.000149103	0.00580732
MGP_BALBcJ_G0018709__Proca1	94.7413	0.87248	0.230245	3.78935	0.000151039	0.00586756
MGP_BALBcJ_G0020124__Cdca7l	201.84	0.989102	0.261289	3.78547	0.00015342	0.00593436
MGP_BALBcJ_G0034955__Rab8b	1036.43	-0.96401	0.254674	-3.78526	0.000153546	0.00593436
MGP_BALBcJ_G0017821__Mmp19	784.368	-1.3082	0.346069	-3.78019	0.00015671	0.00602575
MGP_BALBcJ_G0019425__Rnf213	5071.56	0.240801	0.0636978	3.78037	0.000156596	0.00602575
MGP_BALBcJ_G0027577__Sf3b4	813.892	-0.392636	0.103928	-3.77795	0.000158123	0.0060646
MGP_BALBcJ_G0020703__Slc6a19	58.9111	1.21741	0.322523	3.77464	0.000160236	0.00613004
MGP_BALBcJ_G0016510__Rgs1	106.663	-2.45982	0.652267	-3.77118	0.000162479	0.00616888
MGP_BALBcJ_G0021422__Fdft1	901.93	0.426667	0.113104	3.77233	0.000161727	0.00616888
MGP_BALBcJ_G0031752__Ercc1	536.44	-0.79085	0.209706	-3.77123	0.000162446	0.00616888
MGP_BALBcJ_G0017995__Plek	1198.72	-2.75434	0.730718	-3.76937	0.000163661	0.00618041
MGP_BALBcJ_G0018076__Sh3pxd2b	2949.03	-0.730127	0.193728	-3.76883	0.000164013	0.00618041
MGP_BALBcJ_G0033714__Map1s	240.271	-0.817463	0.216889	-3.76904	0.000163874	0.00618041
MGP_BALBcJ_G0018160__Btnl9	1275.11	0.896135	0.238139	3.76308	0.000167836	0.00630872
MGP_BALBcJ_G0030135__Clip2	891.857	-0.492225	0.130827	-3.76241	0.000168286	0.00630987
MGP_BALBcJ_G0019493__Zfp750	470.598	1.04567	0.278217	3.75847	0.000170959	0.0063942
MGP_BALBcJ_G0029418__Slc5a1	1003.73	0.844968	0.224968	3.75595	0.000172687	0.00644287
MGP_BALBcJ_G0025604__Garnl3	888.007	0.768875	0.204762	3.75498	0.000173358	0.00644713
MGP_BALBcJ_G0028866__Fgr	249.401	-2.75523	0.73384	-3.75454	0.000173657	0.00644713
MGP_BALBcJ_G0023796__Rpl7l1	1337.36	-0.421716	0.112392	-3.7522	0.000175289	0.00645297
MGP_BALBcJ_G0024251__Cd14	44348.5	-0.594755	0.158492	-3.75259	0.000175016	0.00645297
MGP_BALBcJ_G0028040__Tmem64	2601.87	0.762009	0.203065	3.75253	0.000175058	0.00645297
MGP_BALBcJ_G0031683__C5ar1	300.887	-1.74687	0.465602	-3.75186	0.000175527	0.00645297
MGP_BALBcJ_G0023828__Treml4	19.6364	-2.92972	0.781225	-3.75015	0.000176725	0.00648122
MGP_BALBcJ_G0035287__Celsr3	15.7682	-2.3661	0.631574	-3.74635	0.000179423	0.00656418
MGP_BALBcJ_G0016621__Selp	528.658	-2.00632	0.535749	-3.74488	0.000180478	0.00658678
MGP_BALBcJ_G0019118__Naglu	673.752	0.401386	0.10737	3.73835	0.000185235	0.00672783
MGP_BALBcJ_G0026565__Sec23b	1917.07	-0.405302	0.108401	-3.73893	0.000184808	0.00672783
MGP_BALBcJ_G0029735__Ccni	4668.83	0.299656	0.0801869	3.73697	0.000186248	0.00674836
MGP_BALBcJ_G0035172__Cdv3	1961.47	-0.386876	0.103573	-3.7353	0.000187495	0.00677724
MGP_BALBcJ_G0029226__Ttll10	348.801	0.763917	0.204725	3.73142	0.000190402	0.00686587
MGP_BALBcJ_G0026548__Flrt3	61.5995	-1.85748	0.498108	-3.72907	0.00019219	0.00691381
MGP_BALBcJ_G0017365__Ilvbl	620.806	0.390837	0.105009	3.72193	0.000197702	0.00709515
MGP_BALBcJ_G0029400__Fndc4	78.9125	-1.02202	0.27469	-3.72064	0.000198721	0.00711478
MGP_BALBcJ_G0028625__Btbd19	133.483	-1.01899	0.273964	-3.71944	0.000199665	0.00713164
MGP_BALBcJ_G0022158__Wnt7b	68.7646	-1.76028	0.47394	-3.71414	0.000203895	0.00725895
MGP_BALBcJ_G0026895__Ptpn1	2736.87	-0.285736	0.0769396	-3.71377	0.000204193	0.00725895
MGP_BALBcJ_G0016377__NA	187.255	0.666006	0.179413	3.71213	0.000205521	0.007289
MGP_BALBcJ_G0025290__Phyh	1647.73	0.373925	0.100758	3.71114	0.000206329	0.00730045
MGP_BALBcJ_G0030145__Cldn4	3723.02	-0.993867	0.268012	-3.70829	0.000208665	0.00736583
MGP_BALBcJ_G0021683__Il7r	164.039	-2.13252	0.575207	-3.70739	0.000209409	0.00737482
MGP_BALBcJ_G0023743__Enpp5	4553.37	0.452473	0.122068	3.70671	0.000209966	0.0073772
MGP_BALBcJ_G0034204__Cdt1	114.418	-0.906592	0.244721	-3.7046	0.000211728	0.00742179
MGP_BALBcJ_G0035345__Ccrl2	330.31	-2.3489	0.63421	-3.70367	0.000212505	0.00743175
MGP_BALBcJ_G0024012__Cyp1b1	792.616	-1.40132	0.378827	-3.6991	0.000216366	0.00754927
MGP_BALBcJ_G0025770__Dhrs9	76.5848	-2.10499	0.56923	-3.69796	0.000217337	0.00756564
MGP_BALBcJ_G0020095__Adssl1	165.739	-1.20236	0.325245	-3.69678	0.000218351	0.00758342
MGP_BALBcJ_G0019011__Csf3	42.3399	-2.29343	0.620489	-3.69617	0.000218877	0.00758421
MGP_BALBcJ_G0025822__Hoxd8	171.357	0.745775	0.201817	3.6953	0.000219625	0.00759267
MGP_BALBcJ_G0026801__NA	572.003	-0.581415	0.157537	-3.69067	0.000223667	0.00769712
MGP_BALBcJ_G0034677__Hyou1	4770.16	-1.1231	0.304277	-3.69105	0.000223331	0.00769712
MGP_BALBcJ_G0018013__Ugp2	4288.88	0.652217	0.176764	3.68976	0.000224462	0.00770687
MGP_BALBcJ_G0017567__Dram1	621.05	-1.34889	0.365764	-3.68786	0.000226148	0.00774712
MGP_BALBcJ_G0024377__Eif1a	1295.18	-0.630249	0.171003	-3.68559	0.00022817	0.00776573
MGP_BALBcJ_G0024427__Smim3	566.698	-0.422966	0.114764	-3.68552	0.000228237	0.00776573
MGP_BALBcJ_G0029485__Lyar	334.639	-0.670907	0.181992	-3.68648	0.000227381	0.00776573
MGP_BALBcJ_G0004533__NA	21.3673	-1.6545	0.449565	-3.68021	0.000233039	0.00789349
MGP_BALBcJ_G0021287__Slc7a8	467.228	-1.01122	0.274738	-3.68067	0.000232626	0.00789349
MGP_BALBcJ_G0017999__Pno1	826.622	-0.49372	0.134179	-3.67956	0.000233637	0.00789599
MGP_BALBcJ_G0005837__Gm38171	11.8986	-4.38536	1.19308	-3.67566	0.000237237	0.00799729
MGP_BALBcJ_G0019241__Ftsj3	1445.17	-0.534365	0.145435	-3.67426	0.00023854	0.00799729
MGP_BALBcJ_G0020750__Vcan	992.408	-2.08289	0.566834	-3.6746	0.00023822	0.00799729
MGP_BALBcJ_G0028808__Marcksl1	4725.88	-0.454385	0.123675	-3.67403	0.000238757	0.00799729
MGP_BALBcJ_G0022758__Slc15a2	911.758	0.849235	0.231184	3.67342	0.000239321	0.00799842
MGP_BALBcJ_G0030260__Pdgfa	517.957	-1.02805	0.280057	-3.67084	0.000241751	0.00806175
MGP_BALBcJ_G0018872__Gm525	20.7893	2.45276	0.668315	3.67007	0.000242481	0.00806824
MGP_BALBcJ_G0032972__Atxn2l	4823.69	-0.221498	0.0603732	-3.66881	0.000243679	0.00809025
MGP_BALBcJ_G0028085__Rragd	688.382	0.887153	0.242325	3.661	0.000251233	0.00830446
MGP_BALBcJ_G0028780__Gjb4	61.4218	-2.36404	0.645723	-3.66108	0.000251159	0.00830446
MGP_BALBcJ_G0016619__Sele	59.76	-2.05682	0.561941	-3.6602	0.000252017	0.00830661
MGP_BALBcJ_G0028446__Cyp2j9	60.6691	1.08063	0.295271	3.65981	0.0002524	0.00830661
MGP_BALBcJ_G0024199__Nrep	1889.44	1.06535	0.291532	3.65431	0.000257879	0.00846844
MGP_BALBcJ_G0033851__Farsa	879.092	-0.356411	0.097555	-3.65344	0.000258751	0.00847861
MGP_BALBcJ_G0031496__AU018091	18.0088	-3.00007	0.821932	-3.65002	0.000262222	0.00856932
MGP_BALBcJ_G0033629__Tma16	187.107	-0.655779	0.179686	-3.64959	0.000262657	0.00856932
MGP_BALBcJ_G0017240__Ddx21	2303.81	-0.574199	0.15736	-3.64895	0.000263313	0.00857216
MGP_BALBcJ_G0021106__Lrrc18	16.2076	1.91108	0.523899	3.6478	0.000264491	0.00859196
MGP_BALBcJ_G0033067__Bag3	1201.34	-0.424944	0.116519	-3.64699	0.000265326	0.00860057
MGP_BALBcJ_G0024852__Ms4a6d	580.531	-1.27807	0.350573	-3.64567	0.000266699	0.00862651
MGP_BALBcJ_G0029045__Efhd2	3458.76	-0.742271	0.20364	-3.64502	0.000267372	0.00862977
MGP_BALBcJ_G0022087__Tef	1517.86	1.40106	0.384466	3.64418	0.000268249	0.00863957
MGP_BALBcJ_G0021082__Eaf1	1529.71	-0.461589	0.126701	-3.64312	0.000269352	0.00864903
MGP_BALBcJ_G0033189__Ifitm6	52.5412	-1.94601	0.534207	-3.6428	0.00026969	0.00864903
MGP_BALBcJ_G0015025__2610203C22Rik	335.347	0.878884	0.241745	3.63558	0.000277356	0.00881262
MGP_BALBcJ_G0016857__Rrp15	323.24	-0.632497	0.174016	-3.6347	0.000278299	0.00881262
MGP_BALBcJ_G0018761__Ccl2	454.793	-3.12222	0.858494	-3.63686	0.000275981	0.00881262
MGP_BALBcJ_G0023015__NA	832.718	-0.517285	0.142263	-3.6361	0.000276794	0.00881262
MGP_BALBcJ_G0026169__Cd44	1835.2	-2.728	0.750513	-3.63485	0.000278145	0.00881262
MGP_BALBcJ_G0028772__Sfpq	4735.55	-0.408619	0.112367	-3.63646	0.000276411	0.00881262
MGP_BALBcJ_G0030957__Pcbp1	3886.9	-0.31171	0.0857728	-3.63414	0.000278912	0.0088135
MGP_BALBcJ_G0015893__Npas2	546.075	-1.33015	0.366224	-3.63206	0.000281166	0.00886615
MGP_BALBcJ_G0019628__Ahr	1231.57	-0.544922	0.1501	-3.63039	0.000282996	0.00890522
MGP_BALBcJ_G0021667__Osmr	7661.63	-0.506813	0.139629	-3.62972	0.00028373	0.00890972
MGP_BALBcJ_G0018465__Cntrob	257.21	0.470342	0.129727	3.62562	0.00028827	0.00901052
MGP_BALBcJ_G0022995__Scaf4	1240.08	-0.336468	0.0928137	-3.6252	0.000288734	0.00901052
MGP_BALBcJ_G0027103__Skil	1734.91	-0.90407	0.249327	-3.62604	0.000287804	0.00901052
MGP_BALBcJ_G0027953__Adgrl4	764.099	0.560572	0.154676	3.62417	0.000289896	0.00901789
MGP_BALBcJ_G0033771__Hmox1	2566.52	-0.838172	0.231289	-3.62392	0.000290166	0.00901789
MGP_BALBcJ_G0001176__NA	226.459	-0.610993	0.16871	-3.62156	0.000292826	0.00906745
MGP_BALBcJ_G0021826__Has2	128.661	-2.21709	0.612211	-3.62144	0.000292964	0.00906745
MGP_BALBcJ_G0031864__Cyp2s1	26.9851	1.32189	0.365076	3.62086	0.000293627	0.00906935
MGP_BALBcJ_G0016711__Cd84	147.11	-2.00499	0.553915	-3.61968	0.00029497	0.00909221
MGP_BALBcJ_G0025024__Lipk	36.9368	1.29447	0.358121	3.61462	0.000300784	0.00924468
MGP_BALBcJ_G0025218__Dusp5	1320.63	-0.959875	0.265576	-3.61431	0.000301144	0.00924468
MGP_BALBcJ_G0025419__Abca2	1820.14	0.423019	0.117089	3.61279	0.000302918	0.00928024
MGP_BALBcJ_G0016755__Ifi202b	529.024	-1.07735	0.298293	-3.61173	0.000304164	0.00929953
MGP_BALBcJ_G0004735__Snhg6	132.666	-0.789831	0.218909	-3.60804	0.000308524	0.00934747
MGP_BALBcJ_G0016422__Pik3c2b	751.677	0.5439	0.150695	3.60927	0.000307054	0.00934747
MGP_BALBcJ_G0030356__Rnf6	1460.24	-0.287598	0.0797161	-3.60778	0.000308833	0.00934747
MGP_BALBcJ_G0033590__Spcs3	2541.58	-0.43852	0.121542	-3.60797	0.0003086	0.00934747
MGP_BALBcJ_G0035200__Dusp7	2012.34	-0.481505	0.133459	-3.60789	0.000308698	0.00934747
MGP_BALBcJ_G0027932__Cyr61	937.239	-1.82104	0.505408	-3.60311	0.000314438	0.00948998
MGP_BALBcJ_G0034811__Ube2q2	1702.09	-0.614758	0.170633	-3.60281	0.0003148	0.00948998
MGP_BALBcJ_G0029836__Tmem175	500.458	0.380714	0.105691	3.60214	0.00031561	0.0094954
MGP_BALBcJ_G0033359__Tfdp1	1006.99	-0.379734	0.10547	-3.60038	0.000317754	0.00954086
MGP_BALBcJ_G0028356__Tnc	5775.39	-1.28164	0.356054	-3.59957	0.000318746	0.00955162
MGP_BALBcJ_G0022712__Muc20	1158.87	0.586718	0.163073	3.59788	0.000320817	0.0095946
MGP_BALBcJ_G0012316__NA	78.485	-1.50123	0.41732	-3.59731	0.000321524	0.00959671
MGP_BALBcJ_G0017288__Bcr	1658.64	-0.339253	0.0943615	-3.59525	0.000324078	0.0096538
MGP_BALBcJ_G0019203__Map3k14	483.969	-0.418217	0.11638	-3.59356	0.000326197	0.00969776
MGP_BALBcJ_G0031214__Necap1	759.042	-0.348992	0.0971372	-3.59278	0.000327174	0.00970767
MGP_BALBcJ_G0019282__Abca8b	163.164	0.959677	0.267162	3.59211	0.000328007	0.00971327
MGP_BALBcJ_G0026720__Eif6	1472.71	-0.524319	0.145996	-3.59133	0.000329	0.00972355
MGP_BALBcJ_G0036384__NA	1422.36	-0.86917	0.242069	-3.59058	0.000329938	0.00973221
MGP_BALBcJ_G0015318__Snhg1	452.67	-0.619254	0.172576	-3.58829	0.000332858	0.00979915
MGP_BALBcJ_G0022271__Rnd1	100.297	-1.27451	0.355293	-3.58722	0.000334217	0.00981999
MGP_BALBcJ_G0029502__Bst1	205.238	-1.47187	0.410895	-3.58211	0.000340827	0.0099947
MGP_BALBcJ_G0017703__Rap1b	4864.69	-0.321395	0.0897942	-3.57924	0.000344589	0.0100552
MGP_BALBcJ_G0025762__Stk39	2369.66	0.761691	0.21279	3.57954	0.000344202	0.0100552
MGP_BALBcJ_G0027087__Tnik	1910.98	0.409031	0.114302	3.57851	0.000345559	0.0100552
MGP_BALBcJ_G0030044__Wdr66	97.0998	-0.733322	0.204905	-3.57884	0.000345121	0.0100552
MGP_BALBcJ_G0029626__Ppat	222.982	-0.589584	0.164816	-3.57723	0.000347252	0.010085
MGP_BALBcJ_G0031211__Slc2a3	82.7542	-1.49502	0.418204	-3.57485	0.000350426	0.0101576
MGP_BALBcJ_G0030224__Pilra	42.2697	-1.73368	0.485618	-3.57005	0.000356918	0.010326
MGP_BALBcJ_G0027697__Wdr77	649.73	-0.518723	0.145466	-3.56595	0.000362545	0.0104287
MGP_BALBcJ_G0035008__Myo5c	3027.99	0.652573	0.182972	3.56652	0.00036175	0.0104287
MGP_BALBcJ_G0035972__Tlr13	381.966	-1.55785	0.436819	-3.56635	0.00036199	0.0104287
MGP_BALBcJ_G0022951__Bach1	1541.51	-0.370416	0.103918	-3.56449	0.000364558	0.0104666
MGP_BALBcJ_G0032782__Syt9	267.022	0.51556	0.144671	3.56367	0.0003657	0.0104779
MGP_BALBcJ_G0035005__Fam214a	1354.38	0.802693	0.225272	3.56321	0.000366342	0.0104779
MGP_BALBcJ_G0026212__Lgr4	14975.8	0.782951	0.21989	3.56065	0.000369934	0.0105606
MGP_BALBcJ_G0030899__Mogs	1279.53	-0.517814	0.145456	-3.55994	0.000370944	0.0105695
MGP_BALBcJ_G0026526__Fermt1	248.429	-1.52311	0.427962	-3.55898	0.000372293	0.0105879
MGP_BALBcJ_G0019552__Lpin1	2587.11	0.557661	0.156745	3.55776	0.000374036	0.0106174
MGP_BALBcJ_G0019445__Ccdc137	311.048	-0.525971	0.147879	-3.55678	0.000375432	0.010637
MGP_BALBcJ_G0016624__Ccdc181	244.866	0.442073	0.124363	3.55469	0.000378429	0.0106618
MGP_BALBcJ_G0022782__Cd80	46.8118	-2.13114	0.599465	-3.55506	0.000377889	0.0106618
MGP_BALBcJ_G0030246__BC037034	850.718	-0.426409	0.119936	-3.55529	0.000377564	0.0106618
MGP_BALBcJ_G0018569__Pitpnm3	162.802	0.970941	0.273291	3.55277	0.000381197	0.0106998
MGP_BALBcJ_G0030285__Eif3b	4216.53	-0.348579	0.0981038	-3.55317	0.000380619	0.0106998
MGP_BALBcJ_G0029218__Pusl1	345.757	-0.557556	0.156987	-3.55162	0.000382874	0.0107269
MGP_BALBcJ_G0019819__Rdh12	40.1628	-2.20678	0.621476	-3.55086	0.000383969	0.0107376
MGP_BALBcJ_G0023277__Zfp598	2067.41	-0.300024	0.0845793	-3.54725	0.000389281	0.010866
MGP_BALBcJ_G0005532__Gm26908	46.0564	1.178	0.332241	3.54562	0.000391684	0.0109129
MGP_BALBcJ_G0021169__Gch1	562.615	-0.823541	0.232399	-3.54366	0.000394621	0.010957
MGP_BALBcJ_G0021796__Nudcd1	542.87	-0.489067	0.138015	-3.54359	0.000394722	0.010957
MGP_BALBcJ_G0036165__Kctd12b	365.167	0.717185	0.20247	3.54217	0.00039685	0.0109958
MGP_BALBcJ_G0021528__Esd	40.4051	-1.38821	0.391974	-3.54158	0.000397737	0.0110002
MGP_BALBcJ_G0018817__Car4	212.96	-1.11239	0.314322	-3.53902	0.000401615	0.0110871
MGP_BALBcJ_G0036212__Car5b	1974.37	0.746044	0.210901	3.5374	0.00040408	0.0111347
MGP_BALBcJ_G0030755__Adcyap1r1	301.563	-0.803765	0.227384	-3.53483	0.000408037	0.0112031
MGP_BALBcJ_G0030824__Gadd45a	693.606	-0.87947	0.248802	-3.53482	0.000408046	0.0112031
MGP_BALBcJ_G0021831__Fam83a	130.782	-1.78656	0.505544	-3.53394	0.000409408	0.0112159
MGP_BALBcJ_G0031411__Art4	33.9874	1.46491	0.41457	3.53356	0.000410003	0.0112159
MGP_BALBcJ_G0023869__Sh3gl1	1032.73	-0.270908	0.0767051	-3.53181	0.000412731	0.0112701
MGP_BALBcJ_G0020814__Utp15	645.046	-0.495971	0.14046	-3.53105	0.000413921	0.0112786
MGP_BALBcJ_G0034147__Cmip	1908.4	-0.442129	0.125226	-3.53065	0.000414539	0.0112786
MGP_BALBcJ_G0022174__Creld2	1284.73	-0.950803	0.269662	-3.5259	0.000422042	0.0114249
MGP_BALBcJ_G0027845__Gar1	361.536	-0.690098	0.195694	-3.52641	0.000421232	0.0114249
MGP_BALBcJ_G0033445__1810011O10Rik	2541.74	-1.15708	0.328174	-3.5258	0.000422211	0.0114249
MGP_BALBcJ_G0036037__Trmt2b	365.159	0.488108	0.138457	3.52534	0.000422947	0.0114249
MGP_BALBcJ_G0027158__Jade1	2569.48	0.347369	0.0986455	3.52138	0.0004293	0.0115757
MGP_BALBcJ_G0021056__Tkt	19898.1	0.543245	0.154328	3.52007	0.00043144	0.0116021
MGP_BALBcJ_G0035705__Ddx26b	720.672	0.380323	0.108051	3.51984	0.000431815	0.0116021
MGP_BALBcJ_G0019200__Fmnl1	564.03	-1.97072	0.560037	-3.51892	0.000433314	0.0116216
MGP_BALBcJ_G0022634__Tra2b	1183.46	-0.40028	0.113819	-3.51681	0.000436774	0.0116729
MGP_BALBcJ_G0030700__Gpnmb	244.592	-2.76236	0.785384	-3.51721	0.000436115	0.0116729
MGP_BALBcJ_G0028081__Mdn1	1444.21	-0.765951	0.217859	-3.51581	0.000438408	0.0116958
MGP_BALBcJ_G0018175__Gfpt2	274.433	-1.02985	0.292989	-3.515	0.000439759	0.0117111
MGP_BALBcJ_G0024690__Ehbp1l1	1180.72	-0.682873	0.194431	-3.51216	0.000444486	0.0117953
MGP_BALBcJ_G0026491__Slc4a11	62.9087	-1.42036	0.404385	-3.5124	0.000444081	0.0117953
MGP_BALBcJ_G0022326__Galnt6	63.283	-2.34416	0.667545	-3.51162	0.00044539	0.0117985
MGP_BALBcJ_G0028943__Id3	273.404	-0.725247	0.206686	-3.50892	0.000449923	0.0118977
MGP_BALBcJ_G0016689__Fcer1g	591.974	-1.23776	0.35294	-3.50701	0.000453176	0.0119627
MGP_BALBcJ_G0031640__Trim28	2987.92	-0.258465	0.0737133	-3.50635	0.000454299	0.0119714
MGP_BALBcJ_G0031901__2310022A10Rik	327.376	-0.461721	0.131787	-3.50353	0.000459133	0.0120777
MGP_BALBcJ_G0019569__Adam17	1852.27	-0.503252	0.143718	-3.50167	0.000462346	0.012141
MGP_BALBcJ_G0029811__NA	59.6875	1.00877	0.28822	3.5	0.000465257	0.0121557
MGP_BALBcJ_G0035322__Ptpn23	2332.54	-0.39364	0.112448	-3.50063	0.000464161	0.0121557
MGP_BALBcJ_G0035368__Dync1li1	1500.35	-0.337551	0.0964443	-3.49996	0.000465326	0.0121557
MGP_BALBcJ_G0015715__NA	2693	0.218422	0.0624178	3.49936	0.000466383	0.0121623
MGP_BALBcJ_G0024390__Prr16	36.8943	-1.50547	0.430539	-3.49671	0.000471036	0.0122202
MGP_BALBcJ_G0024998__Cd274	192.27	-1.65776	0.474033	-3.49715	0.000470258	0.0122202
MGP_BALBcJ_G0034666__Cbl	2017.44	-0.431174	0.123284	-3.4974	0.000469825	0.0122202
MGP_BALBcJ_G0022108__Naga	2717.03	0.442006	0.126462	3.49518	0.000473742	0.0122693
MGP_BALBcJ_G0032226__Rasip1	414.129	-0.697093	0.1996	-3.49245	0.000478607	0.012374
MGP_BALBcJ_G0017358__Pwp2	468.13	-0.655944	0.187908	-3.49078	0.000481616	0.0123908
MGP_BALBcJ_G0026549__Kif16b	1490.79	0.277019	0.0793588	3.49072	0.000481723	0.0123908
MGP_BALBcJ_G0029866__Noc4l	650.738	-0.481479	0.137926	-3.49084	0.000481513	0.0123908
MGP_BALBcJ_G0017171__Tbc1d32	314.568	0.472556	0.135428	3.48934	0.000484206	0.0124123
MGP_BALBcJ_G0026282__Spred1	1157.83	-0.795491	0.227969	-3.48946	0.000483991	0.0124123
MGP_BALBcJ_G0039496__Snord14c	21.9315	-1.73287	0.496959	-3.48694	0.000488575	0.012503
MGP_BALBcJ_G0019778__Hif1a	2816.97	-0.581796	0.16688	-3.48631	0.000489735	0.0125115
MGP_BALBcJ_G0001959__NA	12.0844	-2.69424	0.772993	-3.48547	0.000491271	0.0125295
MGP_BALBcJ_G0007373__Gm22	51.3227	-2.3327	0.669657	-3.48342	0.000495042	0.0126043
MGP_BALBcJ_G0017244__Tet1	116.022	0.953446	0.273817	3.48206	0.000497575	0.0126354
MGP_BALBcJ_G0028656__Ebna1bp2	891.12	-0.418433	0.120175	-3.48186	0.000497937	0.0126354
MGP_BALBcJ_G0019726__Mgat2	1694.7	-0.501443	0.144061	-3.48078	0.000499956	0.0126653
MGP_BALBcJ_G0020051__Wars	1135.05	-0.301812	0.0867373	-3.47961	0.000502138	0.0126992
MGP_BALBcJ_G0018793__Ccl9	1191.54	-1.0637	0.305995	-3.47619	0.000508594	0.0128409
MGP_BALBcJ_G0029214__Dvl1	2259.45	-0.293489	0.0844485	-3.47536	0.000510172	0.0128592
MGP_BALBcJ_G0001103__NA	50.0664	-2.16837	0.625231	-3.46811	0.00052414	0.0130006
MGP_BALBcJ_G0016691__Adamts4	544.538	-1.87223	0.53975	-3.4687	0.000522993	0.0130006
MGP_BALBcJ_G0018365__Smcr8	1833.23	-0.289677	0.0834761	-3.47018	0.000520109	0.0130006
MGP_BALBcJ_G0018774__Nle1	201.592	-0.576858	0.166261	-3.46958	0.00052127	0.0130006
MGP_BALBcJ_G0022809__Cd200r1	90.9434	-1.46242	0.421425	-3.47017	0.000520124	0.0130006
MGP_BALBcJ_G0024623__Clcf1	203.872	-1.57751	0.454386	-3.47174	0.0005171	0.0130006
MGP_BALBcJ_G0026813__Wfdc5	112.236	-1.67919	0.484198	-3.46797	0.000524404	0.0130006
MGP_BALBcJ_G0028851__Rcc1	439.299	-0.509728	0.146903	-3.46983	0.000520779	0.0130006
MGP_BALBcJ_G0032249__Nomo1	2020.68	-0.336782	0.0970643	-3.46968	0.000521075	0.0130006
MGP_BALBcJ_G0034854__Sema7a	738.544	-1.17244	0.338066	-3.4681	0.000524152	0.0130006
MGP_BALBcJ_G0026627__Tcf15	23.0165	1.50617	0.434767	3.46431	0.000531587	0.0131139
MGP_BALBcJ_G0029859__Pgam5	690.189	-0.340848	0.0983857	-3.46441	0.000531398	0.0131139
MGP_BALBcJ_G0032512__Aamdc	393.436	0.616264	0.177885	3.4644	0.00053141	0.0131139
MGP_BALBcJ_G0030100__NA	579.78	-0.760051	0.219512	-3.46245	0.000535276	0.0131833
MGP_BALBcJ_G0020868__Dimt1	157.635	-0.67346	0.194578	-3.46114	0.000537889	0.0132261
MGP_BALBcJ_G0031457__Bcat1	86.7264	-1.22883	0.355313	-3.45843	0.00054333	0.0133381
MGP_BALBcJ_G0026384__Duox2	24.8401	2.5571	0.73975	3.45671	0.000546813	0.0134018
MGP_BALBcJ_G0017590__Cdk17	717.652	-0.578596	0.167771	-3.44872	0.000563242	0.0136931
MGP_BALBcJ_G0022039__Maff	290.452	-1.17483	0.340595	-3.44933	0.000561974	0.0136931
MGP_BALBcJ_G0023965__Emilin2	815.637	-1.72873	0.501195	-3.44922	0.000562215	0.0136931
MGP_BALBcJ_G0024983__Vldlr	379.11	0.663486	0.192372	3.44898	0.000562702	0.0136931
MGP_BALBcJ_G0033511__Dusp4	421.653	-1.11505	0.323169	-3.45035	0.000559857	0.0136931
MGP_BALBcJ_G0016237__Lrrfip1	1388.87	-0.742392	0.215348	-3.44741	0.000565984	0.0137377
MGP_BALBcJ_G0016771__Grem2	94.9775	-1.60288	0.465065	-3.44657	0.000567754	0.0137485
MGP_BALBcJ_G0031244__Eno2	123.689	-0.845374	0.245297	-3.44633	0.000568255	0.0137485
MGP_BALBcJ_G0035588__Lonrf3	57.5366	-1.46656	0.425752	-3.44463	0.000571831	0.0138128
MGP_BALBcJ_G0034506__Pus3	181.224	-0.542178	0.157688	-3.43829	0.00058539	0.0141177
MGP_BALBcJ_G0017663__Phlda1	882.16	-1.20041	0.349398	-3.43566	0.000591121	0.0141677
MGP_BALBcJ_G0021959__Bop1	1135.22	-0.488644	0.142207	-3.43615	0.000590053	0.0141677
MGP_BALBcJ_G0022489__Gspt1	3095.86	-0.2806	0.0816624	-3.4361	0.000590158	0.0141677
MGP_BALBcJ_G0033180__Sirt3	267.648	0.499566	0.145408	3.43561	0.00059122	0.0141677
MGP_BALBcJ_G0022689__Mfi2	110.89	0.915766	0.2666	3.43498	0.000592606	0.0141783
MGP_BALBcJ_G0023738__Pla2g7	883.523	-0.975432	0.284099	-3.43343	0.000596001	0.014237
MGP_BALBcJ_G0029711__Ereg	21.6219	-3.016	0.878925	-3.43146	0.000600345	0.014318
MGP_BALBcJ_G0031238__Emg1	914.659	-0.380656	0.110956	-3.43071	0.00060201	0.0143351
MGP_BALBcJ_G0020533__Hk3	238.927	-2.20842	0.64382	-3.43019	0.000603163	0.0143399
MGP_BALBcJ_G0015932__Wdr75	662.1	-0.669871	0.195352	-3.42906	0.000605685	0.0143545
MGP_BALBcJ_G0020151__Klf6	3362.27	-0.860624	0.25095	-3.42946	0.000604774	0.0143545
MGP_BALBcJ_G0032975__Apobr	4137.14	0.592868	0.172957	3.42783	0.000608416	0.0143966
MGP_BALBcJ_G0031167__Zfp9	423.321	-0.621958	0.1815	-3.42676	0.000610821	0.0144309
MGP_BALBcJ_G0026210__Bdnf	34.2258	-1.50021	0.438011	-3.42506	0.000614658	0.0144791
MGP_BALBcJ_G0029230__AW011738	83.9687	-0.971465	0.283639	-3.42501	0.000614785	0.0144791
MGP_BALBcJ_G0029399__Ift172	717.28	0.443458	0.129513	3.42403	0.000616989	0.0145084
MGP_BALBcJ_G0025308__9230102O04Rik	24.3681	1.42321	0.415779	3.42298	0.000619384	0.014542
MGP_BALBcJ_G0034872__Arih1	2987.56	-0.253995	0.0743019	-3.41841	0.000629871	0.0147652
MGP_BALBcJ_G0017487__Apba3	861.311	-0.297753	0.0872572	-3.41236	0.000644025	0.0150721
MGP_BALBcJ_G0022061__Tab1	714.299	0.301797	0.088468	3.41137	0.000646377	0.0150721
MGP_BALBcJ_G0027902__Eif4e	1326.8	-0.499158	0.146321	-3.4114	0.000646306	0.0150721
MGP_BALBcJ_G0028383__Ttc39b	469.332	-0.784262	0.229913	-3.41112	0.000646961	0.0150721
MGP_BALBcJ_G0016566__Soat1	561.587	-1.21133	0.355232	-3.40996	0.000649728	0.0151132
MGP_BALBcJ_G0015076__Gm15344	104.305	-1.21041	0.355114	-3.40851	0.000653175	0.01517
MGP_BALBcJ_G0021071__Nt5dc2	92.4139	-0.941056	0.276182	-3.40738	0.000655907	0.01521
MGP_BALBcJ_G0015906__Il18r1	176.884	-1.31062	0.385051	-3.40376	0.000664643	0.0153653
MGP_BALBcJ_G0021058__Rft1	697.418	0.388476	0.11413	3.40381	0.00066453	0.0153653
MGP_BALBcJ_G0029084__Tnfrsf1b	716.3	-1.83716	0.53996	-3.4024	0.000667962	0.0153948
MGP_BALBcJ_G0032355__Arrdc4	3084.9	-0.784316	0.230503	-3.40263	0.0006674	0.0153948
MGP_BALBcJ_G0030084__Ncor2	3087.86	-0.548398	0.16123	-3.40134	0.000670565	0.0154312
MGP_BALBcJ_G0025521__Gle1	1299.82	-0.358324	0.105408	-3.39941	0.000675308	0.0154804
MGP_BALBcJ_G0028248__NA	1163.29	-0.512755	0.150819	-3.39981	0.000674335	0.0154804
MGP_BALBcJ_G0033633__Naf1	104.25	-0.62907	0.185063	-3.39922	0.000675783	0.0154804
MGP_BALBcJ_G0026797__Gdap1l1	115.134	0.993889	0.292726	3.39529	0.000685556	0.0156566
MGP_BALBcJ_G0032888__Tmc7	95.3923	-1.32178	0.389293	-3.39533	0.000685449	0.0156566
MGP_BALBcJ_G0033348__Mcf2l	604.501	0.67636	0.199279	3.39404	0.000688707	0.0157048
MGP_BALBcJ_G0024519__Mapk4	613.023	0.858312	0.252951	3.3932	0.000690822	0.0157292
MGP_BALBcJ_G0033935__Herpud1	1195.44	-0.979732	0.289086	-3.38907	0.000701299	0.0159437
MGP_BALBcJ_G0032862__Btbd10	448.228	-0.412823	0.121869	-3.38742	0.000705524	0.0160156
MGP_BALBcJ_G0022006__Ncf4	341.589	-1.47052	0.43458	-3.38378	0.000714951	0.0161589
MGP_BALBcJ_G0027171__Setd7	5477.13	0.559437	0.165305	3.38428	0.000713656	0.0161589
MGP_BALBcJ_G0027939__Mcoln2	124.39	-1.94111	0.573658	-3.38374	0.000715054	0.0161589
MGP_BALBcJ_G0007268__5830432E09Rik	21.9275	-1.78873	0.528745	-3.38297	0.000717075	0.0161803
MGP_BALBcJ_G0019367__Foxj1	93.7115	-1.47823	0.437375	-3.37978	0.00072544	0.0162959
MGP_BALBcJ_G0030171__Ywhag	4804.66	-0.525816	0.155576	-3.37979	0.000725408	0.0162959
MGP_BALBcJ_G0034528__Pknox2	56.3093	-1.00096	0.296096	-3.38053	0.000723458	0.0162959
MGP_BALBcJ_G0035155__Msl2	1371.72	-0.329842	0.0976704	-3.37709	0.000732571	0.0164316
MGP_BALBcJ_G0032539__Slco2b1	715.212	0.622036	0.184234	3.37633	0.000734593	0.0164525
MGP_BALBcJ_G0015188__9330162012Rik	34.4025	1.21189	0.359138	3.37445	0.000739642	0.0165165
MGP_BALBcJ_G0016712__Gm10521	17.7005	-2.9473	0.873357	-3.37468	0.000739013	0.0165165
MGP_BALBcJ_G0024939__Gcnt1	190.702	-1.42889	0.423517	-3.37388	0.000741177	0.0165263
MGP_BALBcJ_G0018177__Rasgef1c	290.877	0.876319	0.259795	3.37312	0.000743226	0.0165475
MGP_BALBcJ_G0027100__Gpr160	362.946	0.505142	0.149806	3.37198	0.000746295	0.0165913
MGP_BALBcJ_G0016730__Tagln2	2241.11	-1.00181	0.297155	-3.37134	0.000748041	0.0166056
MGP_BALBcJ_G0019284__Abca9	680.55	1.10634	0.328253	3.37037	0.000750671	0.0166395
MGP_BALBcJ_G0035467__Ccr5	554.364	-1.43258	0.425115	-3.36988	0.000752021	0.0166449
MGP_BALBcJ_G0030810__Tnip3	68.0013	-1.77197	0.52589	-3.36946	0.000753151	0.0166455
MGP_BALBcJ_G0031546__NA	778.664	-0.351348	0.104428	-3.36452	0.00076678	0.0169219
MGP_BALBcJ_G0033385__Angpt2	121.521	-1.05336	0.313356	-3.36155	0.000775073	0.0170799
MGP_BALBcJ_G0029902__Coro1c	1057.94	-0.734836	0.218742	-3.35938	0.000781187	0.0171895
MGP_BALBcJ_G0027871__Cxxc4	137.442	0.97757	0.291299	3.3559	0.000791081	0.0173819
MGP_BALBcJ_G0026732__Rbm12	275.507	-0.417127	0.124345	-3.35459	0.000794814	0.0174385
MGP_BALBcJ_G0029826__Tmed5	2354.47	-0.238725	0.0711896	-3.35337	0.000798331	0.0174902
MGP_BALBcJ_G0030383__Alox5ap	337.09	-1.11806	0.333829	-3.34921	0.00081041	0.017729
MGP_BALBcJ_G0019813__Tmem229b	709.055	0.820512	0.245187	3.34648	0.000818454	0.0177807
MGP_BALBcJ_G0024981__Smarca2	2081.81	0.520619	0.155575	3.3464	0.000818667	0.0177807
MGP_BALBcJ_G0029472__Man2b2	997.752	0.461062	0.137757	3.34693	0.000817129	0.0177807
MGP_BALBcJ_G0033815__Ddx39	735.113	-0.498988	0.149082	-3.34707	0.000816717	0.0177807
MGP_BALBcJ_G0035179__Ackr4	109.267	1.30071	0.38855	3.3476	0.000815149	0.0177807
MGP_BALBcJ_G0020723__Ell2	1823.07	-0.474862	0.141932	-3.3457	0.000820747	0.0178002
MGP_BALBcJ_G0033420__Nek5	123.886	0.634918	0.189883	3.34374	0.000826573	0.0179008
MGP_BALBcJ_G0016573__Rasal2	705.213	-0.427145	0.127815	-3.34189	0.000832108	0.0179948
MGP_BALBcJ_G0026952__Ppp1r3d	68.0302	-1.31041	0.392575	-3.338	0.000843847	0.0182046
MGP_BALBcJ_G0032448__Arnt2	68.889	-1.63917	0.491082	-3.33787	0.000844224	0.0182046
MGP_BALBcJ_G0017542__Cry1	595.234	-1.02978	0.308652	-3.33636	0.000848831	0.0182778
MGP_BALBcJ_G0020804__Hmgcr	539.007	-0.478702	0.143516	-3.33554	0.000851342	0.0183057
MGP_BALBcJ_G0021118__Anxa8	582.991	-1.05695	0.317215	-3.33198	0.000862315	0.0185152
MGP_BALBcJ_G0018055__Sptbn1	9329.05	0.218306	0.0655461	3.33057	0.000866683	0.0185247
MGP_BALBcJ_G0026443__Nphp1	199.324	0.617888	0.185538	3.33025	0.000867671	0.0185247
MGP_BALBcJ_G0027736__Ampd2	887.667	-0.572108	0.171761	-3.33084	0.000865841	0.0185247
MGP_BALBcJ_G0029443__Sh3bp2	2097.37	-0.55667	0.167126	-3.33084	0.000865848	0.0185247
MGP_BALBcJ_G0029915__Mvk	184.9	0.51776	0.155519	3.32924	0.000870833	0.0185659
MGP_BALBcJ_G0018733__Ksr1	304.696	-0.630509	0.189451	-3.32808	0.00087447	0.0186171
MGP_BALBcJ_G0032328__Mphosph10	542.837	-0.562073	0.168909	-3.32766	0.000875772	0.0186185
MGP_BALBcJ_G0027327__Lrba	2101.82	0.454653	0.136646	3.32723	0.000877127	0.018621
MGP_BALBcJ_G0024832__Ccdc86	454.643	-0.617022	0.185591	-3.32464	0.000885331	0.0187688
MGP_BALBcJ_G0021172__Lgals3	1448.06	-2.11582	0.636562	-3.32383	0.000887916	0.0187708
MGP_BALBcJ_G0028803__Zbtb8a	573.334	0.74348	0.223677	3.32391	0.000887659	0.0187708
MGP_BALBcJ_G0033811__Dnajb1	1110.44	-0.48229	0.145133	-3.32309	0.000890252	0.0187938
MGP_BALBcJ_G0007221__Gm10603	223.961	0.640476	0.192785	3.32223	0.000892995	0.0188253
MGP_BALBcJ_G0019091__Eif1	3069.11	-0.343624	0.103467	-3.3211	0.000896627	0.0188755
MGP_BALBcJ_G0035886__Arhgef9	98.2466	1.08609	0.327198	3.31936	0.000902249	0.0189674
MGP_BALBcJ_G0021989__NA	1128.53	1.14105	0.343855	3.31839	0.000905372	0.0190065
MGP_BALBcJ_G0025099__Frat2	90.5956	0.71412	0.21524	3.31778	0.00090735	0.0190089
MGP_BALBcJ_G0035891__Las1l	1257.41	-0.672901	0.202829	-3.31758	0.000908009	0.0190089
MGP_BALBcJ_G0018889__Nme1	395.606	-0.618333	0.186486	-3.3157	0.000914125	0.0191104
MGP_BALBcJ_G0023917__Tnfsf14	25.384	-3.71101	1.1196	-3.31458	0.000917799	0.0191342
MGP_BALBcJ_G0031774__Tomm40	720.003	-0.437908	0.132106	-3.31483	0.000916979	0.0191342
MGP_BALBcJ_G0035249__Uba7	874.501	0.563011	0.169911	3.31356	0.000921178	0.0191781
MGP_BALBcJ_G0022766__Gtf2e1	321.98	-0.415557	0.125433	-3.31297	0.000923113	0.0191918
MGP_BALBcJ_G0029106__Angptl7	31.6607	1.39933	0.42255	3.31162	0.000927568	0.0192579
MGP_BALBcJ_G0027286__Ppid	1143.22	-0.490576	0.148164	-3.31105	0.00092948	0.0192711
MGP_BALBcJ_G0028577__Pdzk1ip1	186.124	0.79011	0.238813	3.30849	0.000938008	0.0194211
MGP_BALBcJ_G0025382__Psd4	364.595	-1.11248	0.33638	-3.30723	0.000942251	0.0194289
MGP_BALBcJ_G0029814__NA	21.5194	1.35349	0.409191	3.30772	0.000940574	0.0194289
MGP_BALBcJ_G0033518__D8Ertd82e	1335.9	-0.587183	0.177544	-3.30726	0.000942143	0.0194289
MGP_BALBcJ_G0017470__Gng7	2719.17	0.650253	0.19668	3.30615	0.000945873	0.0194489
MGP_BALBcJ_G0019273__Gna13	2775.37	-0.419426	0.126876	-3.30579	0.00094709	0.0194489
MGP_BALBcJ_G0022337__Krt7	1360.36	-0.973897	0.294593	-3.3059	0.000946704	0.0194489
MGP_BALBcJ_G0031624__Zfp551	49.8288	0.916531	0.277448	3.30343	0.000955092	0.0195865
MGP_BALBcJ_G0024005__Cebpz	1030.01	-0.420253	0.12731	-3.30102	0.00096333	0.0197286
MGP_BALBcJ_G0031021__Iqsec1	2930.86	-0.438597	0.132971	-3.29844	0.000972249	0.0198843
MGP_BALBcJ_G0019680__Baz1a	1811.67	-0.470197	0.142602	-3.29726	0.000976341	0.0199409
MGP_BALBcJ_G0018657__Slc43a2	10128.3	0.494883	0.150124	3.29649	0.000979016	0.0199454
MGP_BALBcJ_G0029213__Mxra8	384.369	0.744354	0.225806	3.29643	0.000979209	0.0199454
MGP_BALBcJ_G0025323__Itga8	9665.08	0.460038	0.13959	3.29564	0.000981967	0.0199746
MGP_BALBcJ_G0004716__Gm15726	25.337	-3.16381	0.960393	-3.29429	0.000986714	0.0200441
MGP_BALBcJ_G0026414__Atp8b4	81.649	-1.71697	0.521329	-3.29345	0.000989649	0.0200767
MGP_BALBcJ_G0032073__Rhpn2	3364.66	0.355324	0.107952	3.29148	0.00099661	0.0201907
MGP_BALBcJ_G0027353__Gpatch4	333.778	-0.690163	0.209856	-3.28875	0.00100633	0.0203603
MGP_BALBcJ_G0025480__Slc2a6	70.1484	-1.59433	0.484932	-3.28774	0.00100996	0.0204064
MGP_BALBcJ_G0019407__Timp2	9176.97	0.655968	0.199623	3.28604	0.00101608	0.0205025
MGP_BALBcJ_G0000078__Ighv1-5	74.7152	1.92135	0.584806	3.28545	0.00101821	0.020518
MGP_BALBcJ_G0015738__G530011O06Rik	69.8425	-1.46265	0.445402	-3.28388	0.00102387	0.0206045
MGP_BALBcJ_G0020522__Nop16	475.191	-0.512339	0.156139	-3.28129	0.00103332	0.020767
MGP_BALBcJ_G0032593__Rhog	1064.41	-0.415184	0.126547	-3.28087	0.00103487	0.0207705
MGP_BALBcJ_G0016205__Neu2	14.9759	2.27643	0.693939	3.28045	0.00103643	0.020774
MGP_BALBcJ_G0020475__Ptpdc1	151.103	0.695136	0.211947	3.27976	0.00103897	0.0207973
MGP_BALBcJ_G0030673__Krba1	880.806	0.421107	0.128415	3.27926	0.0010408	0.0208063
MGP_BALBcJ_G0016415__Dstyk	1593.9	0.320708	0.0978524	3.27747	0.00104742	0.0208557
MGP_BALBcJ_G0028379__Nfib	2832.73	0.320979	0.0979348	3.27748	0.00104739	0.0208557
MGP_BALBcJ_G0033790__Abce1	2370.19	-0.529697	0.161589	-3.27804	0.00104531	0.0208557
MGP_BALBcJ_G0031511__Mboat7	1198.07	-0.262855	0.0802146	-3.2769	0.00104954	0.0208703
MGP_BALBcJ_G0029014__Padi1	26.9064	1.17049	0.35728	3.2761	0.0010525	0.0209015
MGP_BALBcJ_G0007478__Gm38150	13.72	-1.95797	0.597901	-3.27474	0.0010576	0.0209753
MGP_BALBcJ_G0020488__Aspn	288.347	1.07857	0.329627	3.27208	0.00106759	0.0211456
MGP_BALBcJ_G0018885__Utp18	510.035	-0.376857	0.115244	-3.27008	0.00107517	0.0212678
MGP_BALBcJ_G0032937__Ubfd1	1432.2	-0.32907	0.100681	-3.26845	0.00108137	0.0213623
MGP_BALBcJ_G0022663__Il1rap	2022.49	-0.797093	0.243944	-3.26752	0.00108495	0.0214051
MGP_BALBcJ_G0006559__NA	84.2162	-0.788275	0.241372	-3.26581	0.00109152	0.0214785
MGP_BALBcJ_G0016050__NA	880.426	0.631782	0.19344	3.26604	0.00109065	0.0214785
MGP_BALBcJ_G0018532__Alox15	54.0054	1.46859	0.449798	3.26499	0.00109469	0.0215128
MGP_BALBcJ_G0026346__NA	1323.72	0.554403	0.169906	3.26301	0.00110237	0.0216073
MGP_BALBcJ_G0030317__Kdelr2	2218.75	-0.435113	0.13334	-3.26318	0.00110169	0.0216073
MGP_BALBcJ_G0020982__Nudt13	341.126	0.46758	0.143332	3.26221	0.00110546	0.0216352
MGP_BALBcJ_G0025230__Vti1a	863.142	0.323306	0.0991157	3.2619	0.00110666	0.0216352
MGP_BALBcJ_G0024514__Mex3c	1218.39	-0.393379	0.120627	-3.26112	0.00110973	0.0216671
MGP_BALBcJ_G0016183__B3gnt7	17.3112	-1.66024	0.509442	-3.25895	0.00111827	0.0217492
MGP_BALBcJ_G0024989__4430402I18Rik	17.6999	1.53399	0.470651	3.25929	0.00111692	0.0217492
MGP_BALBcJ_G0025221__Pdcd4	7435.48	0.847438	0.260032	3.25897	0.00111818	0.0217492
MGP_BALBcJ_G0023111__Agpat4	103.934	-0.858713	0.263639	-3.25716	0.00112535	0.0218587
MGP_BALBcJ_G0023745__Clic5	173.985	0.723889	0.222361	3.25547	0.00113206	0.0219607
MGP_BALBcJ_G0003489__Grin1os	73.6295	1.70199	0.523186	3.25313	0.00114141	0.0221138
MGP_BALBcJ_G0018272__G3bp1	2279.6	-0.487255	0.149835	-3.25195	0.00114614	0.0221485
MGP_BALBcJ_G0021498__Sorbs3	1082.53	0.357355	0.109888	3.252	0.00114598	0.0221485
MGP_BALBcJ_G0030489__Zfp800	556.512	-0.389669	0.119852	-3.25124	0.00114902	0.0221756
MGP_BALBcJ_G0029753__Prkg2	13.0301	-2.20752	0.679142	-3.25045	0.00115223	0.0222093
MGP_BALBcJ_G0018531__Alox12e	62.7477	4.99037	1.53613	3.24867	0.00115948	0.0222625
MGP_BALBcJ_G0020847__Slc30a5	1771.51	-0.355664	0.109504	-3.24795	0.00116238	0.0222625
MGP_BALBcJ_G0027880__Nfkb1	3033.53	-0.422598	0.130111	-3.24798	0.00116228	0.0222625
MGP_BALBcJ_G0029468__Tbc1d14	3226.78	-0.501402	0.154325	-3.24901	0.00115809	0.0222625
MGP_BALBcJ_G0030160__Pom121	1024.42	-0.394998	0.121567	-3.24923	0.00115719	0.0222625
MGP_BALBcJ_G0026920__Cass4	47.8425	-2.03661	0.627457	-3.24582	0.00117115	0.0224019
MGP_BALBcJ_G0020572__Tgfbi	2078.86	-1.84754	0.56965	-3.24329	0.0011816	0.0225732
MGP_BALBcJ_G0017304__Gstt2	819.555	0.570398	0.175909	3.24256	0.0011846	0.0226018
MGP_BALBcJ_G0030031__P2rx7	1482.73	0.350695	0.108207	3.24096	0.00119126	0.0227002
MGP_BALBcJ_G0019973__Lgmn	4415.28	-0.740572	0.22902	-3.23366	0.00122215	0.0231989
MGP_BALBcJ_G0025544__Ier5l	199.184	-0.89198	0.275864	-3.23341	0.00122324	0.0231989
MGP_BALBcJ_G0026287__Gpr176	46.162	-1.21715	0.37637	-3.23392	0.00122103	0.0231989
MGP_BALBcJ_G0026543__Esf1	581.857	-0.313865	0.097072	-3.23332	0.00122359	0.0231989
MGP_BALBcJ_G0029909__Acacb	3605.57	0.918671	0.284353	3.23074	0.00123471	0.0233803
MGP_BALBcJ_G0025600__Fam129b	6178.2	-0.499732	0.154744	-3.22942	0.00124044	0.02343
MGP_BALBcJ_G0028205__Reck	314.864	0.590311	0.182779	3.22964	0.00123945	0.02343
MGP_BALBcJ_G0019210__Wnt9b	24.5769	1.94212	0.601536	3.22861	0.00124395	0.0234399
MGP_BALBcJ_G0031048__Suclg2	877.972	0.313546	0.0971157	3.22858	0.00124407	0.0234399
MGP_BALBcJ_G0032404__Man2a2	4673.25	0.384557	0.119148	3.22756	0.00124849	0.0234937
MGP_BALBcJ_G0000060__Ighv14-4	118.327	-2.03437	0.630764	-3.22524	0.00125866	0.0235033
MGP_BALBcJ_G0005724__C430042M11Rik	63.5615	1.13954	0.353177	3.22653	0.00125299	0.0235033
MGP_BALBcJ_G0024585__NA	195.507	0.491816	0.1525	3.22503	0.00125958	0.0235033
MGP_BALBcJ_G0025119__Pyroxd2	1403.36	0.61616	0.191013	3.22575	0.00125644	0.0235033
MGP_BALBcJ_G0025547__Ntmt1	392.603	-0.349743	0.108449	-3.22496	0.00125991	0.0235033
MGP_BALBcJ_G0029498__Cpeb2	756.036	-0.620818	0.192381	-3.22702	0.00125085	0.0235033
MGP_BALBcJ_G0034063__Cirh1a	676.859	-0.52578	0.162979	-3.22607	0.00125504	0.0235033
MGP_BALBcJ_G0023921__Vav1	425.925	-1.27813	0.396507	-3.22347	0.00126647	0.0235964
MGP_BALBcJ_G0029851__Crlf2	198.102	-0.470098	0.145882	-3.22245	0.00127098	0.0236512
MGP_BALBcJ_G0030069__NA	899.049	-0.228938	0.0710772	-3.22097	0.00127758	0.0237447
MGP_BALBcJ_G0019024__Tns4	567.198	0.663845	0.20616	3.22005	0.00128168	0.0237623
MGP_BALBcJ_G0031395__Gprc5a	57.5263	-1.42237	0.441718	-3.22008	0.00128155	0.0237623
MGP_BALBcJ_G0029384__Cad	827.865	-0.751588	0.233481	-3.21906	0.00128612	0.0238153
MGP_BALBcJ_G0003260__Gm10863	1443.19	0.535468	0.16648	3.21642	0.00129802	0.023969
MGP_BALBcJ_G0026894__Cebpb	963.831	-0.624605	0.194186	-3.21653	0.00129752	0.023969
MGP_BALBcJ_G0034817__Scaper	492.182	0.527393	0.163982	3.21616	0.00129919	0.023969
MGP_BALBcJ_G0018377__Slc47a1	11.1242	-5.54962	1.72616	-3.21501	0.00130441	0.0239989
MGP_BALBcJ_G0019373__Sphk1	193.532	-1.12001	0.348352	-3.21518	0.00130364	0.0239989
MGP_BALBcJ_G0033726__Dda1	954.646	-0.27151	0.0844576	-3.21475	0.00130559	0.0239989
MGP_BALBcJ_G0020094__Inf2	784.813	-0.648935	0.201934	-3.2136	0.0013108	0.0240654
MGP_BALBcJ_G0021515__Dok2	233.36	-1.27847	0.398062	-3.21175	0.0013193	0.0241529
MGP_BALBcJ_G0021871__Tmem71	85.9217	0.940655	0.292934	3.21115	0.00132206	0.0241529
MGP_BALBcJ_G0022785__Tmem39a	819.419	-0.560439	0.174547	-3.21082	0.00132358	0.0241529
MGP_BALBcJ_G0023143__Prdm9	205.894	0.456325	0.14207	3.21196	0.00131831	0.0241529
MGP_BALBcJ_G0034461__Dpy19l1	394.37	-0.589742	0.183665	-3.21097	0.00132289	0.0241529
MGP_BALBcJ_G0004717__NA	17.4266	-2.29502	0.714982	-3.2099	0.0013278	0.0241851
MGP_BALBcJ_G0034101__Sf3b3	2350.84	-0.40374	0.125786	-3.20974	0.00132855	0.0241851
MGP_BALBcJ_G0020012__NA	28.4987	-2.5095	0.782177	-3.20835	0.001335	0.0242731
MGP_BALBcJ_G0030982__Hmces	455.574	-0.381855	0.119038	-3.20783	0.0013374	0.0242876
MGP_BALBcJ_G0022410__Pde1b	141.434	-1.05621	0.329396	-3.20651	0.00134358	0.0243703
MGP_BALBcJ_G0024483__Pmaip1	87.6698	-1.19124	0.371591	-3.20578	0.00134699	0.0244029
MGP_BALBcJ_G0019704__Sec23a	736.478	-0.320273	0.10004	-3.20144	0.00136742	0.0245796
MGP_BALBcJ_G0027857__Hadh	2199.05	0.499288	0.15594	3.2018	0.0013657	0.0245796
MGP_BALBcJ_G0029743__Bmp2k	552.813	-0.74929	0.234057	-3.20131	0.00136805	0.0245796
MGP_BALBcJ_G0029869__Pus1	587.311	-0.392045	0.122427	-3.20228	0.00136345	0.0245796
MGP_BALBcJ_G0029991__Oas1c	118.449	1.00911	0.315091	3.2026	0.00136192	0.0245796
MGP_BALBcJ_G0031503__Tarm1	25.9324	-5.1564	1.61086	-3.20102	0.00136943	0.0245796
MGP_BALBcJ_G0032742__Hpx	11.1292	-2.12612	0.663924	-3.20236	0.00136306	0.0245796
MGP_BALBcJ_G0034529__Tmem218	93.8635	0.757285	0.236582	3.20094	0.00136979	0.0245796
MGP_BALBcJ_G0033297__Mcemp1	46.9286	-4.31803	1.34913	-3.2006	0.00137144	0.0245799
MGP_BALBcJ_G0028347__Orm2	1903.76	1.16507	0.364096	3.19989	0.00137482	0.0246113
MGP_BALBcJ_G0027804__Abcd3	3309.69	0.359486	0.112373	3.19904	0.00137884	0.024654
MGP_BALBcJ_G0023970__Wdr43	1119.66	-0.591845	0.185122	-3.19706	0.00138837	0.0247893
MGP_BALBcJ_G0033091__Bub3	891.696	-0.262816	0.0822128	-3.19678	0.0013897	0.0247893
MGP_BALBcJ_G0017399__Fstl3	134.721	-0.582207	0.18217	-3.19595	0.00139372	0.0248316
MGP_BALBcJ_G0035822__Dkc1	501.503	-0.560101	0.175298	-3.19514	0.00139764	0.024872
MGP_BALBcJ_G0016856__Tgfb2	785.296	0.607395	0.190258	3.19249	0.00141053	0.0250719
MGP_BALBcJ_G0031760__NA	95.1049	-0.892872	0.279973	-3.18913	0.00142699	0.0253346
MGP_BALBcJ_G0017163__Nus1	3779.05	-0.282296	0.0885317	-3.18864	0.00142943	0.025348
MGP_BALBcJ_G0024220__Etf1	4024.13	-0.334024	0.10477	-3.18816	0.00143184	0.0253608
MGP_BALBcJ_G0035928__Zmym3	1233.77	0.365889	0.114807	3.18698	0.00143767	0.0254343
MGP_BALBcJ_G0004163__Abhd11os	336.626	0.876098	0.275107	3.18457	0.00144971	0.0255397
MGP_BALBcJ_G0017368__Casp14	20.9881	1.82795	0.574007	3.18454	0.00144986	0.0255397
MGP_BALBcJ_G0024573__Cndp2	1338.42	-0.500663	0.157177	-3.18534	0.00144583	0.0255397
MGP_BALBcJ_G0028520__Yipf1	741.896	0.290902	0.0913515	3.18443	0.00145041	0.0255397
MGP_BALBcJ_G0015983__Aox1	884.841	0.597399	0.187633	3.18387	0.00145321	0.0255591
MGP_BALBcJ_G0023735__Adgrf5	2987.59	0.358312	0.112576	3.18285	0.00145836	0.0256002
MGP_BALBcJ_G0035204__Abhd14b	1042.95	0.449599	0.141262	3.18273	0.00145894	0.0256002
MGP_BALBcJ_G0015866__Sema4c	1017.3	-0.418983	0.131686	-3.18169	0.00146419	0.0256064
MGP_BALBcJ_G0018453__Ctc1	1138.93	0.504264	0.158473	3.18201	0.00146254	0.0256064
MGP_BALBcJ_G0023459__Rrp1b	669.557	-0.463306	0.145629	-3.1814	0.00146564	0.0256064
MGP_BALBcJ_G0031701__Ptgir	47.8129	-1.23237	0.387376	-3.18131	0.00146608	0.0256064
MGP_BALBcJ_G0018091__Lcp2	298.686	-1.35187	0.425061	-3.18042	0.0014706	0.0256286
MGP_BALBcJ_G0020875__Elovl7	797.042	0.34897	0.109737	3.18006	0.00147246	0.0256286
MGP_BALBcJ_G0026149__Accs	499.765	0.534711	0.16813	3.18035	0.00147099	0.0256286
MGP_BALBcJ_G0026953__Fam217b	108.57	-0.873421	0.274788	-3.17852	0.00148028	0.025735
MGP_BALBcJ_G0019453__P4hb	20246.7	-0.405427	0.127703	-3.17478	0.00149952	0.0260394
MGP_BALBcJ_G0028884__Zdhhc18	1544.76	-0.479936	0.15123	-3.17354	0.00150593	0.0261207
MGP_BALBcJ_G0019325__Hid1	2432.38	-0.348011	0.109686	-3.17279	0.0015098	0.0261578
MGP_BALBcJ_G0030342__Arpc1b	7545.57	-0.361132	0.113866	-3.17155	0.00151629	0.02624
MGP_BALBcJ_G0025001__Ermp1	1302.35	0.288837	0.0911322	3.16943	0.0015274	0.0263439
MGP_BALBcJ_G0025040__Pank1	219.473	0.671234	0.211787	3.16939	0.0015276	0.0263439
MGP_BALBcJ_G0034291__Mmp12	695.437	-1.93772	0.611446	-3.16907	0.00152928	0.0263439
MGP_BALBcJ_G0035120__Zbtb38	1197.29	0.344863	0.108821	3.16909	0.00152919	0.0263439
MGP_BALBcJ_G0023819__Tfeb	365.985	-0.404892	0.127821	-3.16766	0.00153671	0.0264416
MGP_BALBcJ_G0026383__Sord	830.704	0.653509	0.206357	3.16689	0.0015408	0.0264818
MGP_BALBcJ_G0018734__Wsb1	1699.7	-0.555666	0.175653	-3.16343	0.00155921	0.0267371
MGP_BALBcJ_G0025841__Plekha3	775.495	-0.299899	0.094801	-3.16346	0.00155904	0.0267371
MGP_BALBcJ_G0016296__Slco4c1	124.158	0.741382	0.234442	3.16232	0.00156517	0.0268089
MGP_BALBcJ_G0027801__Slc44a3	1258.82	0.720934	0.22833	3.15743	0.00159167	0.0271395
MGP_BALBcJ_G0028606__Mast2	2081.85	-0.467772	0.148137	-3.1577	0.00159018	0.0271395
MGP_BALBcJ_G0030128__Auts2	754.606	-0.410585	0.13003	-3.15762	0.00159063	0.0271395
MGP_BALBcJ_G0039810__NA	1410.87	0.629532	0.199356	3.15783	0.00158947	0.0271395
MGP_BALBcJ_G0025787__Gorasp2	3542.58	-0.324014	0.102631	-3.15708	0.00159359	0.0271414
MGP_BALBcJ_G0033314__Elavl1	1475.67	-0.38732	0.122712	-3.15635	0.00159759	0.0271789
MGP_BALBcJ_G0030288__Lfng	312.391	-0.84545	0.267952	-3.15522	0.00160375	0.0272528
MGP_BALBcJ_G0025205__Cfap43	410.04	-0.983035	0.311686	-3.15393	0.00161089	0.02729
MGP_BALBcJ_G0033729__Plvap	1008.49	-0.675448	0.214147	-3.15414	0.00160971	0.02729
MGP_BALBcJ_G0034424__AB124611	87.6643	-1.65572	0.524986	-3.15384	0.00161136	0.02729
MGP_BALBcJ_G0029872__Chek2	498.5	0.691208	0.219225	3.15296	0.00161625	0.0273113
MGP_BALBcJ_G0033643__Atp6v1b2	4639.8	-0.406436	0.128905	-3.15299	0.00161605	0.0273113
MGP_BALBcJ_G0023011__Ifnar1	1910.22	-0.379789	0.120483	-3.15223	0.00162031	0.0273493
MGP_BALBcJ_G0031917__Fbl	984.397	-0.599015	0.190096	-3.15112	0.00162644	0.027422
MGP_BALBcJ_G0020069__Traf3	994.532	-0.590275	0.187391	-3.14996	0.00163293	0.0274879
MGP_BALBcJ_G0032928__Igsf6	251.017	-1.25361	0.398002	-3.14977	0.00163399	0.0274879
MGP_BALBcJ_G0023496__Hnrnpm	3812.16	-0.315607	0.100225	-3.149	0.0016383	0.0275297
MGP_BALBcJ_G0036097__Morc4	309.837	-1.01758	0.323271	-3.14776	0.00164529	0.0276163
MGP_BALBcJ_G0024995__Insl6	75.5925	0.760217	0.241595	3.14667	0.00165144	0.0276781
MGP_BALBcJ_G0030332__Bhlha15	243.76	-1.39699	0.44399	-3.14645	0.00165264	0.0276781
MGP_BALBcJ_G0026130__Dgkz	5410.38	-0.572508	0.182069	-3.14446	0.00166395	0.0278366
MGP_BALBcJ_G0018642__Srr	846.25	0.383936	0.122226	3.14119	0.00168262	0.0280865
MGP_BALBcJ_G0029703__Ppbp	20.6739	-2.16861	0.690327	-3.14142	0.00168131	0.0280865
MGP_BALBcJ_G0019527__Rhob	2572.46	-0.417409	0.13292	-3.1403	0.00168773	0.0281217
MGP_BALBcJ_G0019898__Fos	1940.15	-1.07809	0.343349	-3.13994	0.00168985	0.0281217
MGP_BALBcJ_G0023880__Ticam1	446.495	-0.460375	0.146623	-3.13985	0.00169032	0.0281217
MGP_BALBcJ_G0026406__Shc4	115.274	-0.952686	0.303697	-3.13696	0.00170711	0.0282777
MGP_BALBcJ_G0027734__Gstm1	1631.2	0.650165	0.207222	3.13753	0.00170379	0.0282777
MGP_BALBcJ_G0030387__Hsph1	1437.15	-0.933037	0.29739	-3.13742	0.00170445	0.0282777
MGP_BALBcJ_G0032784__Ppfibp2	1025.32	0.491748	0.15676	3.13694	0.00170721	0.0282777
MGP_BALBcJ_G0021329__Dhrs1	1094.89	0.410352	0.130866	3.13567	0.00171464	0.0283696
MGP_BALBcJ_G0018506__2810408A11Rik	85.7522	0.864557	0.275894	3.13365	0.00172646	0.0285339
MGP_BALBcJ_G0021589__Lmo7	423.275	0.614201	0.196046	3.13294	0.00173065	0.0285718
MGP_BALBcJ_G0022904__Nsun3	380.058	0.395564	0.126294	3.13209	0.00173569	0.0286237
MGP_BALBcJ_G0020400__Slc22a23	1367.48	0.435793	0.139186	3.13102	0.00174202	0.0286967
MGP_BALBcJ_G0010136__NA	48.8194	1.85279	0.591954	3.12995	0.00174837	0.0287574
MGP_BALBcJ_G0033976__Tk2	773.107	0.277294	0.0885991	3.12976	0.00174952	0.0287574
MGP_BALBcJ_G0029572__Bend4	154.548	-1.08563	0.347006	-3.12857	0.0017566	0.028811
MGP_BALBcJ_G0033708__Arrdc2	433.506	0.580445	0.18553	3.12858	0.00175655	0.028811
MGP_BALBcJ_G0033302__Cd209e	15.6866	-1.63101	0.52145	-3.12785	0.00176092	0.0288504
MGP_BALBcJ_G0027290__Tmem144	665.453	0.70774	0.226364	3.12656	0.00176865	0.0289374
MGP_BALBcJ_G0029229__Isg15	147.496	-0.754348	0.241289	-3.12632	0.00177007	0.0289374
MGP_BALBcJ_G0030597__Clec5a	79.029	-1.48803	0.476094	-3.1255	0.00177503	0.0289556
MGP_BALBcJ_G0032340__Chsy1	245.648	-0.798965	0.255612	-3.12569	0.00177386	0.0289556
MGP_BALBcJ_G0024235__Ecscr	295.887	-0.858654	0.274845	-3.12414	0.00178326	0.0290584
MGP_BALBcJ_G0016036__Fzd5	359.72	-0.626227	0.200557	-3.12244	0.0017936	0.0291324
MGP_BALBcJ_G0025033__Ifit2	259.995	0.590524	0.189099	3.12283	0.00179123	0.0291324
MGP_BALBcJ_G0035783__Abcd1	1085.7	0.438746	0.140504	3.12267	0.0017922	0.0291324
MGP_BALBcJ_G0002741__Dnm3os	120.034	1.09686	0.351352	3.12183	0.00179731	0.0291613
MGP_BALBcJ_G0021334__Adcy4	464.933	-0.666456	0.213589	-3.12028	0.00180681	0.029284
MGP_BALBcJ_G0027285__Fnip2	1338.39	-0.523173	0.167731	-3.11912	0.00181394	0.0293541
MGP_BALBcJ_G0029515__Slit2	351.217	-1.21949	0.390994	-3.11894	0.00181504	0.0293541
MGP_BALBcJ_G0021501__Piwil2	77.7654	-1.40197	0.449658	-3.11787	0.00182164	0.0294245
MGP_BALBcJ_G0035236__Ifrd2	477.382	-0.449245	0.1441	-3.1176	0.00182329	0.0294245
MGP_BALBcJ_G0016533__Ncf2	518.708	-1.12073	0.359521	-3.11728	0.00182526	0.0294247
MGP_BALBcJ_G0029601__Ociad2	83.6248	0.675839	0.216838	3.11679	0.00182831	0.0294425
MGP_BALBcJ_G0033379__Arhgef10	353.839	0.434098	0.139296	3.11637	0.00183093	0.0294531
MGP_BALBcJ_G0016093__Zfp142	758.999	-0.407331	0.130749	-3.11538	0.00183711	0.0294775
MGP_BALBcJ_G0030858__Mat2a	4642.36	-0.371908	0.119363	-3.11578	0.00183457	0.0294775
MGP_BALBcJ_G0031329__Gabarapl1	3779.7	0.309887	0.0994764	3.11518	0.00183831	0.0294775
MGP_BALBcJ_G0018478__Trp53	1348.59	-0.398926	0.128096	-3.11428	0.00184395	0.0295364
MGP_BALBcJ_G0017490__Cactin	710.453	-0.326561	0.10488	-3.11365	0.0018479	0.0295554
MGP_BALBcJ_G0022256__Zfp641	250.516	0.596935	0.191727	3.11346	0.00184905	0.0295554
MGP_BALBcJ_G0028916__Ldlrap1	1029.03	-0.331101	0.106378	-3.1125	0.00185513	0.0296211
MGP_BALBcJ_G0036194__Phka2	761.043	0.569354	0.183058	3.11024	0.00186937	0.029817
MGP_BALBcJ_G0025702__Tnfaip6	91.7456	-2.149	0.691193	-3.10911	0.00187651	0.0298675
MGP_BALBcJ_G0026116__Ddb2	596.01	0.469314	0.150948	3.10911	0.00187649	0.0298675
MGP_BALBcJ_G0001723__NA	10.5467	-1.97834	0.636377	-3.10875	0.00187879	0.0298723
MGP_BALBcJ_G0015967__Coq10b	274.836	-0.62457	0.201025	-3.10693	0.00189041	0.0300254
MGP_BALBcJ_G0034917__Dennd4a	1110.33	-0.703883	0.226575	-3.10662	0.00189242	0.0300258
MGP_BALBcJ_G0024016__Srsf7	1610.54	-0.469719	0.151257	-3.10543	0.0019	0.0301143
MGP_BALBcJ_G0030677__Lrrc61	368.374	0.488049	0.157224	3.10417	0.00190812	0.0301795
MGP_BALBcJ_G0035907__Awat2	41.0677	0.837126	0.269671	3.10425	0.0019076	0.0301795
MGP_BALBcJ_G0028247__Alg2	751.32	-0.392173	0.126365	-3.1035	0.00191248	0.030194
MGP_BALBcJ_G0029190__Ski	2810.49	-0.373799	0.120459	-3.10311	0.00191496	0.030194
MGP_BALBcJ_G0031979__Zfp568	724.597	-0.402446	0.129692	-3.1031	0.00191504	0.030194
MGP_BALBcJ_G0015553__NA	3224.13	-0.372089	0.120036	-3.09982	0.0019364	0.0304326
MGP_BALBcJ_G0017656__Nav3	549.802	-0.918212	0.296164	-3.10035	0.00193294	0.0304326
MGP_BALBcJ_G0019655__Stxbp6	952.09	0.636966	0.205504	3.09953	0.00193827	0.0304326
MGP_BALBcJ_G0023428__Pim1	997.735	-0.514149	0.165895	-3.09924	0.00194016	0.0304326
MGP_BALBcJ_G0030447__Mdfic	972.501	-0.394533	0.127301	-3.09923	0.00194027	0.0304326
MGP_BALBcJ_G0031215__Clec4a1	143.937	-0.885268	0.285695	-3.09865	0.00194404	0.03046
MGP_BALBcJ_G0028999__Mrto4	488.589	-0.503224	0.162431	-3.09809	0.00194773	0.0304862
MGP_BALBcJ_G0030427__C1galt1	3865.81	-0.310041	0.100094	-3.09749	0.00195167	0.0305161
MGP_BALBcJ_G0019854__Papln	2146.48	0.660399	0.213298	3.09613	0.00196068	0.0306251
MGP_BALBcJ_G0030744__Plekha8	212.66	0.422069	0.136376	3.09488	0.00196891	0.0307068
MGP_BALBcJ_G0030972__Arhgap25	189.308	-1.13243	0.365924	-3.09472	0.00196998	0.0307068
MGP_BALBcJ_G0023298__Hn1l	779.783	-0.471863	0.152516	-3.09385	0.00197575	0.030765
MGP_BALBcJ_G0019337__Gga3	904.605	-0.358975	0.116125	-3.09129	0.00199288	0.0309358
MGP_BALBcJ_G0023879__Dpp9	1332.5	-0.38364	0.124084	-3.09178	0.00198959	0.0309358
MGP_BALBcJ_G0036053__Nxf7	111.632	1.62262	0.524865	3.09151	0.00199142	0.0309358
MGP_BALBcJ_G0030138__Lat2	240.988	-0.933279	0.302012	-3.0902	0.00200021	0.0309858
MGP_BALBcJ_G0035218__Manf	2941.11	-0.775638	0.25099	-3.09032	0.0019994	0.0309858
MGP_BALBcJ_G0016191__Dis3l2	491.456	0.395011	0.127866	3.08926	0.00200655	0.0310203
MGP_BALBcJ_G0033349__F7	18.2334	-3.15157	1.02012	-3.0894	0.0020056	0.0310203
MGP_BALBcJ_G0026361__Ppip5k1	1450.68	0.262983	0.0851404	3.08882	0.00200954	0.0310346
MGP_BALBcJ_G0017696__Lyz2	4693.67	-1.10288	0.357242	-3.08722	0.00202041	0.0311545
MGP_BALBcJ_G0030161__Hip1	958.015	-0.669228	0.216784	-3.08707	0.00202143	0.0311545
MGP_BALBcJ_G0018862__Cuedc1	906.167	0.394795	0.127902	3.08669	0.00202396	0.0311615
MGP_BALBcJ_G0024640__Rbm14	662.37	-0.486269	0.157588	-3.08571	0.00203069	0.0312333
MGP_BALBcJ_G0030092__Tmem132c	20.8467	1.79068	0.581082	3.08164	0.00205863	0.0316307
MGP_BALBcJ_G0017524__NA	5491.27	-0.407556	0.132282	-3.08096	0.00206335	0.031671
MGP_BALBcJ_G0022160__Cdpf1	244.03	0.42167	0.136889	3.08038	0.00206737	0.0317004
MGP_BALBcJ_G0023137__NA	731.438	0.369237	0.11991	3.07929	0.00207492	0.0317516
MGP_BALBcJ_G0023426__Mtch1	2376.19	0.238821	0.0775569	3.0793	0.00207486	0.0317516
MGP_BALBcJ_G0019364__Srp68	2168.53	-0.240232	0.0781275	-3.07487	0.00210593	0.0320969
MGP_BALBcJ_G0021582__Klf5	319.937	-0.409402	0.133145	-3.07486	0.00210601	0.0320969
MGP_BALBcJ_G0021616__Abcc4	197.474	-0.674997	0.219485	-3.07537	0.00210245	0.0320969
MGP_BALBcJ_G0026651__Id1	197.253	-0.96259	0.312964	-3.07572	0.00209995	0.0320969
MGP_BALBcJ_G0027511__S100a10	1296.8	-0.584432	0.190092	-3.07447	0.0021088	0.0321071
MGP_BALBcJ_G0030072__Rilpl2	359.975	-0.529009	0.172083	-3.07415	0.00211103	0.0321085
MGP_BALBcJ_G0032270__Spty2d1	1385.86	-0.333527	0.108513	-3.0736	0.00211489	0.0321349
MGP_BALBcJ_G0020775__Jmy	1990.77	0.225187	0.0733756	3.06897	0.002148	0.0326051
MGP_BALBcJ_G0025000__Ric1	1184.48	-0.421772	0.137471	-3.06808	0.00215442	0.0326695
MGP_BALBcJ_G0034421__Qtrt1	261.257	-0.448561	0.14627	-3.06667	0.00216455	0.0327902
MGP_BALBcJ_G0033188__Ifitm3	1927.3	-0.717651	0.234047	-3.06627	0.0021675	0.032802
MGP_BALBcJ_G0021062__Itih4	262.15	-1.18675	0.387656	-3.06134	0.00220352	0.0332802
MGP_BALBcJ_G0027622__Hmgcs2	216.938	1.08548	0.354579	3.06134	0.00220351	0.0332802
MGP_BALBcJ_G0020104__Gpr132	75.6069	-1.73483	0.566785	-3.06082	0.00220732	0.0333043
MGP_BALBcJ_G0020480__Ninj1	827.472	-0.505902	0.165345	-3.05967	0.0022158	0.0333691
MGP_BALBcJ_G0034046__Dpep2	88.9753	-0.954649	0.312014	-3.05964	0.00221604	0.0333691
MGP_BALBcJ_G0028495__1700024P16Rik	576.678	0.787077	0.257321	3.05873	0.00222276	0.0334368
MGP_BALBcJ_G0021154__Txndc16	1322.35	0.726513	0.237654	3.05702	0.00223552	0.0335844
MGP_BALBcJ_G0030851__Usp39	620.901	-0.348576	0.114033	-3.05681	0.00223703	0.0335844
MGP_BALBcJ_G0020417__Ssr1	5306.49	-0.386757	0.126588	-3.05525	0.00224876	0.0337269
MGP_BALBcJ_G0033279__Tpcn2	426.572	-0.565275	0.185195	-3.05233	0.00227074	0.0339921
MGP_BALBcJ_G0035735__Slitrk4	48.4606	1.58494	0.519261	3.0523	0.00227095	0.0339921
MGP_BALBcJ_G0015833__NA	1662.64	-0.308008	0.100945	-3.05125	0.00227894	0.0340103
MGP_BALBcJ_G0021668__Lifr	3015.41	0.626683	0.205357	3.05168	0.00227565	0.0340103
MGP_BALBcJ_G0026778__Mafb	1880.84	-0.858148	0.281242	-3.05128	0.00227869	0.0340103
MGP_BALBcJ_G0019741__Atl1	48.087	1.00528	0.329505	3.05088	0.00228168	0.0340176
MGP_BALBcJ_G0029867__Ddx51	454.865	-0.404003	0.13247	-3.04976	0.00229022	0.0341112
MGP_BALBcJ_G0032208__Snrnp70	8510.5	-0.165713	0.0543608	-3.04839	0.00230073	0.0342339
MGP_BALBcJ_G0016066__Mreg	63.2396	-1.59939	0.524861	-3.04727	0.00230929	0.0342597
MGP_BALBcJ_G0020811__Enc1	397.94	-0.577482	0.189501	-3.04738	0.00230845	0.0342597
MGP_BALBcJ_G0022796__Qtrtd1	441.267	-0.550812	0.180752	-3.04733	0.00230886	0.0342597
MGP_BALBcJ_G0017104__Ddo	836.85	0.316464	0.103893	3.04606	0.00231863	0.0343521
MGP_BALBcJ_G0025273__Csf2ra	699.042	-0.875014	0.287294	-3.04571	0.00232135	0.0343521
MGP_BALBcJ_G0031406__Plbd1	277.357	-1.11753	0.366937	-3.04558	0.00232235	0.0343521
MGP_BALBcJ_G0018369__Natd1	1145.39	0.378249	0.124232	3.04469	0.00232922	0.03442
MGP_BALBcJ_G0026362__Ckmt1	325.214	0.648393	0.213031	3.04366	0.00233719	0.0345038
MGP_BALBcJ_G0019151__Rdm1	211.953	0.611629	0.201001	3.04292	0.00234295	0.0345551
MGP_BALBcJ_G0019403__Pgs1	1984.66	-0.443805	0.145899	-3.04187	0.00235114	0.0346419
MGP_BALBcJ_G0021370__Ift88	421.622	0.309877	0.101978	3.03866	0.00237636	0.0347872
MGP_BALBcJ_G0021921__Gpihbp1	984.463	0.57979	0.190818	3.03844	0.00237806	0.0347872
MGP_BALBcJ_G0023443__Abcg1	968.583	-0.832528	0.273847	-3.04012	0.00236485	0.0347872
MGP_BALBcJ_G0024667__Eif1ad	567.458	-0.345111	0.113588	-3.03826	0.00237946	0.0347872
MGP_BALBcJ_G0024845__Ms4a4a	235.932	-0.923542	0.303859	-3.03938	0.00237065	0.0347872
MGP_BALBcJ_G0028025__Gem	73.2961	-1.1685	0.384574	-3.03843	0.00237811	0.0347872
MGP_BALBcJ_G0029048__NA	1451.61	-0.341983	0.112521	-3.03928	0.00237143	0.0347872
MGP_BALBcJ_G0032923__Polr3e	696.858	-0.30942	0.101837	-3.03838	0.00237854	0.0347872
MGP_BALBcJ_G0017335__Itgb2	787.952	-1.70298	0.560942	-3.03594	0.00239791	0.035023
MGP_BALBcJ_G0025300__Dhtkd1	283.843	0.714495	0.235378	3.03552	0.00240123	0.0350375
MGP_BALBcJ_G0019036__Krt23	31.2334	1.32642	0.437156	3.03421	0.00241168	0.0351559
MGP_BALBcJ_G0030920__Nagk	1026.69	0.335552	0.110674	3.03189	0.00243029	0.0353931
MGP_BALBcJ_G0028631__Tmem53	279.723	0.808658	0.266758	3.03144	0.00243393	0.0354118
MGP_BALBcJ_G0022954__Cldn8	3055.55	0.507164	0.167319	3.03111	0.00243653	0.0354154
MGP_BALBcJ_G0025799__Pdk1	1450.16	0.699743	0.230914	3.03032	0.00244292	0.0354399
MGP_BALBcJ_G0034490__Barx2	404.06	0.776289	0.256168	3.03038	0.00244243	0.0354399
MGP_BALBcJ_G0028787__Phc2	2480.18	-0.40734	0.134437	-3.02998	0.00244572	0.0354464
MGP_BALBcJ_G0031445__Golt1b	821.609	-0.410065	0.135394	-3.02869	0.00245619	0.035564
MGP_BALBcJ_G0021749__Pop1	143.652	-0.598439	0.197617	-3.02828	0.00245952	0.0355781
MGP_BALBcJ_G0031885__Snrpa	945.349	-0.255671	0.0844382	-3.02791	0.00246254	0.0355876
MGP_BALBcJ_G0030678__Rarres2	754.088	-0.773943	0.25577	-3.02594	0.00247864	0.0357781
MGP_BALBcJ_G0033254__Kcnq1	111.857	1.06226	0.351076	3.02571	0.00248047	0.0357781
MGP_BALBcJ_G0005669__9530082P21Rik	413.064	0.583214	0.19281	3.0248	0.00248796	0.0358518
MGP_BALBcJ_G0030989__Ruvbl1	409.158	-0.444515	0.146972	-3.02449	0.00249051	0.0358543
MGP_BALBcJ_G0015845__Ccdc115	437.411	-0.342727	0.113355	-3.02348	0.00249888	0.0359405
MGP_BALBcJ_G0016945__Rab32	301.075	-0.772579	0.255599	-3.02263	0.00250592	0.0359997
MGP_BALBcJ_G0019136__Psme3	2006.37	-0.255516	0.0845489	-3.02211	0.00251017	0.0359997
MGP_BALBcJ_G0021369__Cryl1	367.354	0.51018	0.16881	3.02221	0.00250938	0.0359997
MGP_BALBcJ_G0027313__Trim2	1698.59	0.592123	0.195969	3.02151	0.00251515	0.0360027
MGP_BALBcJ_G0029377__Emilin1	565.637	-1.04888	0.347126	-3.02161	0.00251433	0.0360027
MGP_BALBcJ_G0032570__NA	1059.27	0.441326	0.146161	3.01945	0.00253235	0.0361803
MGP_BALBcJ_G0036046__Gla	549.804	-0.85062	0.281701	-3.01959	0.0025312	0.0361803
MGP_BALBcJ_G0035556__4930578C19Rik	84.6426	0.626231	0.207441	3.01884	0.00253744	0.0362186
MGP_BALBcJ_G0006574__AI839979	18.1803	-2.40961	0.798654	-3.01709	0.00255212	0.036273
MGP_BALBcJ_G0018814__Pigw	186.923	-0.463387	0.153609	-3.01667	0.00255569	0.036273
MGP_BALBcJ_G0019293__Cog1	863.214	0.228148	0.0756064	3.01758	0.00254801	0.036273
MGP_BALBcJ_G0022544__Crkl	1055.77	-0.287696	0.0953604	-3.01693	0.00255349	0.036273
MGP_BALBcJ_G0033641__Lpl	13831.1	0.659245	0.218473	3.01751	0.00254863	0.036273
MGP_BALBcJ_G0034241__Urb2	593.051	-0.478944	0.158738	-3.01719	0.00255131	0.036273
MGP_BALBcJ_G0022204__Shank3	918.384	-0.531274	0.176181	-3.01549	0.00256563	0.0363228
MGP_BALBcJ_G0022697__Nrros	519.572	-1.20882	0.40087	-3.01548	0.00256576	0.0363228
MGP_BALBcJ_G0023108__Qk	2687.81	-0.256226	0.0849726	-3.0154	0.00256643	0.0363228
MGP_BALBcJ_G0024547__Epg5	1503.51	0.481133	0.159596	3.01469	0.00257242	0.0363734
MGP_BALBcJ_G0017457__Dot1l	2907.15	-0.30265	0.100437	-3.01332	0.00258402	0.0365033
MGP_BALBcJ_G0018871__Dgke	374.083	0.375615	0.124806	3.00959	0.002616	0.0368609
MGP_BALBcJ_G0020997__Zswim8	4532.77	-0.186089	0.0618395	-3.00923	0.00261912	0.0368609
MGP_BALBcJ_G0023912__Dennd1c	187.278	-1.35485	0.450225	-3.00927	0.00261878	0.0368609
MGP_BALBcJ_G0027008__Rgs19	493.473	-0.423327	0.140653	-3.00972	0.00261489	0.0368609
MGP_BALBcJ_G0018927__Phb	788.31	-0.344442	0.114527	-3.00752	0.00263385	0.0370277
MGP_BALBcJ_G0020141__Akr1c14	366.614	1.30132	0.432762	3.00701	0.00263835	0.0370277
MGP_BALBcJ_G0031023__Hdac11	693.249	0.498821	0.165874	3.00722	0.00263651	0.0370277
MGP_BALBcJ_G0029210__Mrpl20	715.233	-0.268466	0.0893231	-3.00556	0.0026509	0.0371694
MGP_BALBcJ_G0032933__Scnn1b	1585.46	0.64071	0.213197	3.00524	0.00265368	0.0371737
MGP_BALBcJ_G0015405__Gm14005	314.64	-0.95593	0.318183	-3.00434	0.00266157	0.0372497
MGP_BALBcJ_G0015950__Inpp1	573.668	0.424357	0.14133	3.00258	0.00267697	0.0373378
MGP_BALBcJ_G0016395__Ikbke	516.043	-0.866684	0.288662	-3.00242	0.00267844	0.0373378
MGP_BALBcJ_G0018445__Ndel1	1918.38	-0.471074	0.156909	-3.00221	0.00268026	0.0373378
MGP_BALBcJ_G0029046__Fhad1	21.9002	-1.35906	0.452604	-3.00276	0.00267546	0.0373378
MGP_BALBcJ_G0032339__Vimp	1526.66	-0.411405	0.136991	-3.00316	0.00267193	0.0373378
MGP_BALBcJ_G0004909__3830432H09Rik	27.3138	-1.82142	0.607101	-3.00019	0.00269813	0.0375521
MGP_BALBcJ_G0021035__Arf4	4856.26	-0.291972	0.0973586	-2.99894	0.00270925	0.037672
MGP_BALBcJ_G0030513__Smo	1092.63	0.318309	0.106154	2.99856	0.00271259	0.0376838
MGP_BALBcJ_G0016295__St8sia4	281.928	-0.750876	0.250481	-2.99774	0.00271992	0.0377508
MGP_BALBcJ_G0026138__Cry2	454.044	0.844783	0.281856	2.99722	0.00272458	0.0377806
MGP_BALBcJ_G0017814__Ikzf4	182.547	-0.609101	0.203543	-2.99249	0.0027671	0.0381709
MGP_BALBcJ_G0019909__Angel1	591.945	0.48944	0.16355	2.99259	0.00276617	0.0381709
MGP_BALBcJ_G0025735__Rbms1	2364.82	-0.442837	0.147974	-2.99268	0.00276543	0.0381709
MGP_BALBcJ_G0026887__B4galt5	555.823	-1.12094	0.374521	-2.99301	0.00276242	0.0381709
MGP_BALBcJ_G0027741__Cyb561d1	797.113	0.296607	0.0991184	2.99245	0.00276744	0.0381709
MGP_BALBcJ_G0034870__Adpgk	459.489	-0.488952	0.163398	-2.9924	0.00276791	0.0381709
MGP_BALBcJ_G0016957__Phactr2	673.608	0.434994	0.145392	2.99186	0.00277284	0.0382039
MGP_BALBcJ_G0027208__Serp1	8105.04	-0.477738	0.159731	-2.99089	0.00278163	0.0382753
MGP_BALBcJ_G0032514__Clns1a	862.975	-0.259576	0.0867936	-2.99073	0.00278311	0.0382753
MGP_BALBcJ_G0035965__Pbdc1	497.138	-0.451111	0.150883	-2.9898	0.00279159	0.038357
MGP_BALBcJ_G0033049__Prss8	2005.85	0.510731	0.170855	2.98927	0.00279649	0.0383893
MGP_BALBcJ_G0027247__Ccnl1	2976.51	-0.478834	0.160293	-2.98725	0.00281502	0.0386086
MGP_BALBcJ_G0026147__Alx4	70.2691	1.19561	0.400359	2.98636	0.00282324	0.0386861
MGP_BALBcJ_G0021320__Ipo4	1538.62	-0.457221	0.153197	-2.98453	0.00284012	0.0388467
MGP_BALBcJ_G0035917__Dlg3	783.946	0.434183	0.145472	2.98465	0.00283903	0.0388467
MGP_BALBcJ_G0023261__Abca3	5840.38	0.460788	0.1545	2.98246	0.00285946	0.039046
MGP_BALBcJ_G0032609__Trim68	1287.13	0.609181	0.204258	2.98241	0.00285987	0.039046
MGP_BALBcJ_G0024171__Fhod3	842.951	0.614027	0.20592	2.98187	0.00286496	0.0390801
MGP_BALBcJ_G0029873__Ttc28	404.669	0.463333	0.155422	2.98112	0.00287193	0.0391398
MGP_BALBcJ_G0025614__Hspa5	26488.5	-0.836436	0.280625	-2.98062	0.00287664	0.0391685
MGP_BALBcJ_G0034109__Pdpr	990.594	0.487785	0.16368	2.98011	0.00288141	0.0391981
MGP_BALBcJ_G0019561__Atp6v1c2	504.216	-0.815746	0.273881	-2.97847	0.0028969	0.0392235
MGP_BALBcJ_G0020396__Bphl	430.595	0.524385	0.176033	2.97891	0.00289278	0.0392235
MGP_BALBcJ_G0020664__NA	63.9032	0.808186	0.271272	2.97925	0.00288957	0.0392235
MGP_BALBcJ_G0021935__Zfp707	260.777	0.406104	0.136349	2.97842	0.00289742	0.0392235
MGP_BALBcJ_G0033024__NA	1907.62	-0.315105	0.105802	-2.97826	0.00289889	0.0392235
MGP_BALBcJ_G0035924__Il2rg	127.926	-1.30073	0.436596	-2.97926	0.00288945	0.0392235
MGP_BALBcJ_G0016117__Tuba4a	2580.69	-0.582544	0.195653	-2.97744	0.0029067	0.0392938
MGP_BALBcJ_G0017412__Arid3a	464.529	-0.369918	0.124302	-2.97595	0.00292083	0.0394496
MGP_BALBcJ_G0023541__Btnl4	25.9087	1.7167	0.577024	2.9751	0.00292895	0.0395237
MGP_BALBcJ_G0016855__Lyplal1	145.331	0.660683	0.222142	2.97414	0.00293809	0.0395404
MGP_BALBcJ_G0023102__Prr18	37.0317	-1.05512	0.354795	-2.97387	0.00294067	0.0395404
MGP_BALBcJ_G0024094__Rab18	5739.61	0.357934	0.120344	2.97426	0.00293692	0.0395404
MGP_BALBcJ_G0030830__Eif2ak3	1503.51	-0.325323	0.10937	-2.97451	0.00293455	0.0395404
MGP_BALBcJ_G0006465__Gm12860	185.197	1.14187	0.384203	2.97206	0.00295808	0.039739
MGP_BALBcJ_G0022631__Senp2	1570.34	-0.226873	0.0763706	-2.97068	0.00297137	0.039882
MGP_BALBcJ_G0027623__NA	1787.03	0.706933	0.238011	2.97017	0.00297635	0.0399132
MGP_BALBcJ_G0028054__Atp6v0d2	23.6378	-2.2842	0.769326	-2.9691	0.00298675	0.0400171
MGP_BALBcJ_G0026476__Cpxm1	1020.45	-1.58401	0.533679	-2.9681	0.00299652	0.04011
MGP_BALBcJ_G0031418__Eps8	493.746	-0.588247	0.198225	-2.96757	0.00300166	0.04011
MGP_BALBcJ_G0034409__Raver1	1724.5	-0.24953	0.084084	-2.96763	0.00300106	0.04011
MGP_BALBcJ_G0020729__Arsk	337.511	0.331595	0.111756	2.96712	0.00300599	0.0401322
MGP_BALBcJ_G0022122__Serhl	549.168	0.543944	0.183434	2.96533	0.00302358	0.0403313
MGP_BALBcJ_G0017045__Lama2	1438.39	0.627717	0.211773	2.9641	0.00303569	0.0404214
MGP_BALBcJ_G0021093__Timm23	645.373	-0.359884	0.121412	-2.96414	0.00303526	0.0404214
MGP_BALBcJ_G0019595__Sntg2	52.5777	0.859407	0.290144	2.962	0.00305643	0.0406616
MGP_BALBcJ_G0016236__Rab17	426.947	1.02216	0.345217	2.96092	0.00306727	0.0407697
MGP_BALBcJ_G0026471__Snrpb	1869.62	-0.275047	0.0929332	-2.95962	0.00308018	0.0408847
MGP_BALBcJ_G0029445__Mfsd10	1319.78	-0.290288	0.0980865	-2.9595	0.00308134	0.0408847
MGP_BALBcJ_G0024727__Sf1	4771.98	-0.288006	0.0973796	-2.95756	0.00310082	0.0411071
MGP_BALBcJ_G0022949__Cct8	2893.87	-0.363823	0.123029	-2.95721	0.00310438	0.0411181
MGP_BALBcJ_G0028197__NA	182.936	0.72098	0.243832	2.95687	0.00310776	0.0411267
MGP_BALBcJ_G0016098__Cyp27a1	218.283	0.9874	0.334101	2.9554	0.00312266	0.0411891
MGP_BALBcJ_G0016878__Atf3	584.15	-1.60294	0.542441	-2.95505	0.00312614	0.0411891
MGP_BALBcJ_G0019921__Ahsa1	1398.49	-0.293317	0.0992401	-2.95563	0.00312035	0.0411891
MGP_BALBcJ_G0021520__Rb1	7826.57	0.281269	0.0951788	2.95516	0.00312503	0.0411891
MGP_BALBcJ_G0038461__Snord100	13.8093	-1.88229	0.636848	-2.95564	0.00312021	0.0411891
MGP_BALBcJ_G0030033__Camkk2	1289.21	-0.327071	0.110724	-2.95392	0.00313762	0.0413042
MGP_BALBcJ_G0021687__Agxt2	21.9046	1.30378	0.441451	2.95339	0.00314306	0.0413397
MGP_BALBcJ_G0021624__Rap2a	906.26	-0.41832	0.141675	-2.95267	0.00315039	0.0414
MGP_BALBcJ_G0027717__Lamtor5	994.275	0.244357	0.0827668	2.95236	0.00315354	0.0414053
MGP_BALBcJ_G0026506__Rnf24	404.256	-0.347734	0.117841	-2.95088	0.00316866	0.0415677
MGP_BALBcJ_G0039793__NA	853.712	0.400755	0.135844	2.95011	0.00317656	0.0416351
MGP_BALBcJ_G0024060__Mcfd2	3708.18	-0.275814	0.0935169	-2.94935	0.00318439	0.0417014
MGP_BALBcJ_G0021335__Ripk3	162.57	-0.752242	0.255119	-2.94859	0.00319226	0.0417682
MGP_BALBcJ_G0017198__Micu1	1451.36	0.344567	0.116875	2.94816	0.00319671	0.0417902
MGP_BALBcJ_G0026465__F830045P16Rik	12.5438	1.64329	0.558009	2.94492	0.00323038	0.0421758
MGP_BALBcJ_G0026529__Tmx4	795.512	-0.616587	0.209383	-2.94478	0.00323181	0.0421758
MGP_BALBcJ_G0019147__Rnd2	166.435	0.638147	0.216885	2.94233	0.00325748	0.0423827
MGP_BALBcJ_G0027546__Mllt11	198.541	-0.445134	0.151255	-2.94294	0.00325106	0.0423827
MGP_BALBcJ_G0031422__Mgst1	21866.1	0.419768	0.142651	2.94262	0.00325446	0.0423827
MGP_BALBcJ_G0032847__Ampd3	451.535	-0.553001	0.187972	-2.94193	0.00326172	0.0423827
MGP_BALBcJ_G0033749__Tpm4	5185.22	-0.551685	0.187513	-2.94212	0.00325978	0.0423827
MGP_BALBcJ_G0034866__Nptn	3174.25	0.192316	0.0654081	2.94025	0.00327949	0.0425769
MGP_BALBcJ_G0019115__Stat3	15333.1	-0.273476	0.0930413	-2.9393	0.00328954	0.0426339
MGP_BALBcJ_G0024952__Zfand5	4324.81	-0.309896	0.105426	-2.93948	0.00328768	0.0426339
MGP_BALBcJ_G0027169__Naa15	1805.04	-0.361967	0.123188	-2.93834	0.0032998	0.0427302
MGP_BALBcJ_G0021257__Mettl3	564.749	-0.348837	0.118734	-2.93797	0.00330372	0.0427442
MGP_BALBcJ_G0017701__Slc35e3	904.246	-0.288481	0.0982662	-2.93571	0.00332789	0.04302
MGP_BALBcJ_G0035096__NA	536.011	-0.641004	0.218369	-2.93542	0.00333096	0.0430228
MGP_BALBcJ_G0017898__Rnf185	1546.84	-0.312211	0.106399	-2.93434	0.00334258	0.043029
MGP_BALBcJ_G0029357__Il6	26.8964	-3.03219	1.03332	-2.93443	0.00334165	0.043029
MGP_BALBcJ_G0030390__Fry	334.946	0.38941	0.132675	2.93506	0.00333488	0.043029
MGP_BALBcJ_G0034343__Chordc1	1367.91	-0.439552	0.149797	-2.93431	0.00334286	0.043029
MGP_BALBcJ_G0034821__Tspan3	1977.25	0.372701	0.127064	2.93318	0.0033551	0.0431497
MGP_BALBcJ_G0017557__Nt5dc3	816.27	-0.406139	0.138509	-2.93223	0.00336535	0.0432446
MGP_BALBcJ_G0035047__Senp6	2099.3	-0.251652	0.085844	-2.9315	0.00337325	0.0433092
MGP_BALBcJ_G0035011__Mapk6	2044.63	-0.433603	0.147959	-2.93056	0.00338348	0.0434036
MGP_BALBcJ_G0017128__Scml4	602.796	0.487509	0.166404	2.92967	0.00339321	0.0434544
MGP_BALBcJ_G0023217__Zfp40	259.995	0.541082	0.184687	2.92973	0.00339261	0.0434544
MGP_BALBcJ_G0026649__H13	3892.8	-0.46925	0.1602	-2.92915	0.00339888	0.0434901
MGP_BALBcJ_G0019829__Plekhd1	41.1121	0.968555	0.330706	2.92875	0.00340325	0.0435091
MGP_BALBcJ_G0027343__Sh2d2a	20.5819	-2.26863	0.774737	-2.92826	0.00340864	0.0435411
MGP_BALBcJ_G0033689__Kxd1	676.464	0.435065	0.14862	2.92737	0.00341838	0.0436285
MGP_BALBcJ_G0015774__Prex2	707.586	-0.714206	0.243999	-2.92709	0.00342152	0.0436316
MGP_BALBcJ_G0019160__Cd300lg	1269.5	0.508779	0.173849	2.92655	0.00342745	0.0436567
MGP_BALBcJ_G0031811__Kcnn4	809.354	0.489203	0.16717	2.92638	0.00342928	0.0436567
MGP_BALBcJ_G0016355__Ddx18	738.011	-0.430995	0.147312	-2.92573	0.00343651	0.0436996
MGP_BALBcJ_G0031748__Vasp	1886.74	-0.405693	0.138672	-2.92555	0.00343845	0.0436996
MGP_BALBcJ_G0024470__Nars	3961.95	-0.312233	0.106741	-2.92515	0.00344289	0.0437192
MGP_BALBcJ_G0026176__Nat10	876.1	-0.395598	0.135317	-2.9235	0.00346124	0.0439151
MGP_BALBcJ_G0028827__Tinagl1	1934.93	-0.358328	0.122636	-2.92189	0.00347913	0.0441051
MGP_BALBcJ_G0028857__Ptafr	855.412	-0.800159	0.273921	-2.92113	0.00348767	0.0441762
MGP_BALBcJ_G0017613__Ube2n	1213.43	-0.298252	0.10212	-2.9206	0.0034936	0.0442141
MGP_BALBcJ_G0016268__Gpr35	275.621	-2.0714	0.709954	-2.91765	0.00352676	0.044559
MGP_BALBcJ_G0024326__Pcdh1	2144.1	-0.395852	0.135664	-2.91789	0.00352403	0.044559
MGP_BALBcJ_G0019578__Kidins220	3720.73	0.3124	0.107105	2.91676	0.00353685	0.0446354
MGP_BALBcJ_G0035001__Rsl24d1	463.272	-0.306836	0.105204	-2.9166	0.00353873	0.0446354
MGP_BALBcJ_G0004126__Tbx3os1	22.0701	1.34873	0.462718	2.91479	0.00355922	0.0448563
MGP_BALBcJ_G0018262__Tnip1	738.623	-0.509605	0.174851	-2.9145	0.00356258	0.0448612
MGP_BALBcJ_G0018516__Phf23	1310.2	-0.336474	0.115487	-2.91353	0.00357367	0.0449632
MGP_BALBcJ_G0028561__Spata6	371.561	0.442888	0.152105	2.91173	0.00359438	0.045186
MGP_BALBcJ_G0017755__Ddit3	541.568	-0.685166	0.235344	-2.91134	0.00359879	0.0452038
MGP_BALBcJ_G0005540__Mir17hg	198.404	-0.69634	0.239248	-2.91053	0.00360814	0.0452458
MGP_BALBcJ_G0031155__8430408G22Rik	140.587	1.03763	0.35649	2.91069	0.00360636	0.0452458
MGP_BALBcJ_G0019357__Trim47	228.383	-0.880309	0.302725	-2.90795	0.00363806	0.0455626
MGP_BALBcJ_G0019487__Foxk2	1041.78	-0.311777	0.107239	-2.90731	0.00364549	0.0455626
MGP_BALBcJ_G0024659__Rab1b	3281.05	0.221889	0.0763116	2.90767	0.00364133	0.0455626
MGP_BALBcJ_G0026804__Ada	191.276	-0.701626	0.241315	-2.90752	0.00364311	0.0455626
MGP_BALBcJ_G0019492__Tbcd	1232.28	0.402129	0.138353	2.90655	0.0036544	0.0456361
MGP_BALBcJ_G0020977__2700060E02Rik	2214.94	0.209017	0.0719229	2.90613	0.00365928	0.045651
MGP_BALBcJ_G0027790__Palmd	406.121	0.457338	0.157381	2.90593	0.00366165	0.045651
MGP_BALBcJ_G0032403__Hddc3	445.577	0.368612	0.126942	2.90377	0.00368693	0.0458994
MGP_BALBcJ_G0034202__Ctu2	325.029	-0.40817	0.140568	-2.90371	0.00368766	0.0458994
MGP_BALBcJ_G0018509__Eif5a	3299.65	-0.415313	0.143091	-2.90245	0.00370262	0.0460475
MGP_BALBcJ_G0017425__Midn	3164.24	-0.289104	0.0996544	-2.90106	0.00371898	0.0461747
MGP_BALBcJ_G0031860__Tgfb1	907.33	-0.507666	0.174986	-2.90117	0.00371767	0.0461747
MGP_BALBcJ_G0021271__Mrpl52	477.313	-0.512346	0.176703	-2.89947	0.0037379	0.0462633
MGP_BALBcJ_G0030745__Mturn	558.97	0.729664	0.251623	2.89984	0.00373357	0.0462633
MGP_BALBcJ_G0030900__Wbp1	984.341	0.5091	0.175575	2.89962	0.00373618	0.0462633
MGP_BALBcJ_G0032120__Cd33	272.394	-0.97777	0.337228	-2.89943	0.00373839	0.0462633
MGP_BALBcJ_G0024009__Cdc42ep3	447.263	-0.548875	0.189375	-2.89835	0.0037513	0.046385
MGP_BALBcJ_G0034869__Neo1	2631.5	0.282872	0.0976115	2.89793	0.00375632	0.046409
MGP_BALBcJ_G0023214__Zfp945	568.88	0.403504	0.139294	2.89677	0.00377022	0.0465427
MGP_BALBcJ_G0018916__Pdk2	1608.45	0.480318	0.165855	2.89601	0.00377939	0.0465795
MGP_BALBcJ_G0022727__Umps	349.775	-0.571585	0.197356	-2.89621	0.00377698	0.0465795
MGP_BALBcJ_G0017918__Sf3a1	1309.62	-0.314361	0.108564	-2.89563	0.003784	0.0465982
MGP_BALBcJ_G0022180__Trabd	2206.14	-0.301894	0.104288	-2.89481	0.0037939	0.046682
MGP_BALBcJ_G0017401__Palm	340.771	0.453498	0.156679	2.89444	0.00379836	0.0466988
MGP_BALBcJ_G0027718__Slc16a4	30.5918	1.10139	0.380594	2.89388	0.00380511	0.0467437
MGP_BALBcJ_G0026338__Vps39	1556.73	0.248687	0.0859461	2.89352	0.0038095	0.0467594
MGP_BALBcJ_G0035177__Uba5	1542.02	-0.558766	0.193192	-2.89229	0.00382447	0.046905
MGP_BALBcJ_G0022486__Txndc11	1421.05	-0.357431	0.123592	-2.89202	0.00382777	0.0469073
MGP_BALBcJ_G0017915__Sec14l2	1007.99	0.388118	0.134282	2.89031	0.00384861	0.0470098
MGP_BALBcJ_G0028705__Rlf	861.388	-0.455799	0.157696	-2.89036	0.00384796	0.0470098
MGP_BALBcJ_G0034935__Plekho2	3267.19	-0.497327	0.17204	-2.89076	0.00384307	0.0470098
MGP_BALBcJ_G0034995__Ccpg1os	174.794	0.471177	0.163016	2.89038	0.00384775	0.0470098
MGP_BALBcJ_G0027853__Ostc	1382.25	-0.552147	0.191115	-2.88908	0.00386365	0.0471553
MGP_BALBcJ_G0015307__B430212C06Rik	39.6334	1.055	0.365321	2.88787	0.00387858	0.0471896
MGP_BALBcJ_G0025470__Surf6	660.133	-0.329416	0.11407	-2.88784	0.00387898	0.0471896
MGP_BALBcJ_G0026702__Eif2s2	1647.45	-0.313896	0.108675	-2.88838	0.00387228	0.0471896
MGP_BALBcJ_G0036007__Pof1b	219.935	0.605836	0.209784	2.88791	0.0038781	0.0471896
MGP_BALBcJ_G0021500__Slc39a14	9374.76	-0.433157	0.150028	-2.88718	0.00388711	0.0472122
MGP_BALBcJ_G0028496__Prkaa2	1344.89	0.618576	0.21423	2.88743	0.003884	0.0472122
MGP_BALBcJ_G0021244__Ndrg2	515.687	0.749547	0.259636	2.88691	0.00389042	0.0472144
MGP_BALBcJ_G0016270__Kif1a	102.835	-1.1071	0.383694	-2.88536	0.00390962	0.0472365
MGP_BALBcJ_G0024434__NA	738.406	-0.481562	0.166911	-2.88515	0.00391227	0.0472365
MGP_BALBcJ_G0025524__Set	2199.28	-0.344095	0.119276	-2.88486	0.00391591	0.0472365
MGP_BALBcJ_G0029316__Atg9b	46.5531	-1.24312	0.430927	-2.88474	0.00391731	0.0472365
MGP_BALBcJ_G0029719__Uso1	3261.82	-0.324792	0.11256	-2.8855	0.00390787	0.0472365
MGP_BALBcJ_G0033032__Bcl7c	410.933	-0.323221	0.112007	-2.88571	0.00390529	0.0472365
MGP_BALBcJ_G0034535__Msantd2	329.899	-0.361663	0.125305	-2.88626	0.00389847	0.0472365
MGP_BALBcJ_G0034609__AW551984	79.2174	-1.296	0.449117	-2.88566	0.00390589	0.0472365
MGP_BALBcJ_G0022948__Usp16	1378.68	-0.303686	0.105344	-2.8828	0.00394151	0.0474904
MGP_BALBcJ_G0023856__Armcx3	150.308	-0.55149	0.191321	-2.88255	0.00394475	0.0474914
MGP_BALBcJ_G0030174__Dtx2	352.231	-0.380239	0.131947	-2.88175	0.0039547	0.0475732
MGP_BALBcJ_G0025807__NA	367.148	0.431475	0.149758	2.88115	0.00396221	0.0476256
MGP_BALBcJ_G0018293__1810065E05Rik	2324.6	1.09319	0.379713	2.87899	0.00398945	0.0477181
MGP_BALBcJ_G0020717__Ccdc127	1033.94	-0.253458	0.0880001	-2.8802	0.00397421	0.0477181
MGP_BALBcJ_G0021301__Thtpa	672.646	0.315158	0.109476	2.87879	0.00399207	0.0477181
MGP_BALBcJ_G0021490__Tnfrsf10b	366.081	-0.565645	0.196476	-2.87896	0.00398989	0.0477181
MGP_BALBcJ_G0024794__Tut1	653.731	-0.28779	0.0999432	-2.87954	0.0039826	0.0477181
MGP_BALBcJ_G0028789__Zfp362	932.015	0.316643	0.109986	2.87893	0.00399032	0.0477181
MGP_BALBcJ_G0029895__Cmklr1	591.333	-0.416144	0.144522	-2.87944	0.00398377	0.0477181
MGP_BALBcJ_G0029988__Oas2	443.298	-0.45841	0.159337	-2.87698	0.00401503	0.0479545
MGP_BALBcJ_G0000182__NA	99.2476	1.67322	0.58182	2.87584	0.00402959	0.0479808
MGP_BALBcJ_G0020508__Auh	803.454	0.392058	0.13631	2.87622	0.00402467	0.0479808
MGP_BALBcJ_G0024004__Cebpzos	245.917	0.453926	0.157843	2.87581	0.00402997	0.0479808
MGP_BALBcJ_G0029611__Lnx1	145.75	0.650665	0.226227	2.87616	0.00402547	0.0479808
MGP_BALBcJ_G0023262__Rnps1	342.534	-0.365915	0.127294	-2.87456	0.00404591	0.0481326
MGP_BALBcJ_G0015842__Zfp451	1014.7	-0.336291	0.117041	-2.87327	0.00406247	0.0481927
MGP_BALBcJ_G0023066__Zbtb21	462.078	-0.430288	0.149759	-2.8732	0.00406337	0.0481927
MGP_BALBcJ_G0024985__Pum3	927.193	-0.446939	0.155556	-2.87317	0.00406375	0.0481927
MGP_BALBcJ_G0031080__Itpr1	2558.06	0.370152	0.128815	2.8735	0.00405946	0.0481927
MGP_BALBcJ_G0027679__Slc16a1	1531.85	-0.546167	0.190199	-2.87156	0.00408452	0.0484009
MGP_BALBcJ_G0020781__Lhfpl2	675.392	-1.62278	0.56531	-2.8706	0.00409698	0.0484724
MGP_BALBcJ_G0027563__Ecm1	1185.29	-0.41152	0.143357	-2.8706	0.00409691	0.0484724
MGP_BALBcJ_G0017674__Rab21	979.465	-0.275385	0.0959727	-2.86941	0.00411236	0.048578
MGP_BALBcJ_G0028458__Dock7	4583.87	0.245848	0.085675	2.86954	0.00411067	0.048578
MGP_BALBcJ_G0025037__Ifit1bl2	25.1321	-1.37636	0.480127	-2.86667	0.0041482	0.048963
MGP_BALBcJ_G0016340__Epb41l5	1091.57	0.410626	0.143287	2.86576	0.00416003	0.0490259
MGP_BALBcJ_G0035887__Amer1	662.812	0.479531	0.167324	2.86589	0.00415838	0.0490259
MGP_BALBcJ_G0029151__Nol9	828.703	-0.324977	0.113412	-2.86547	0.00416395	0.0490338
MGP_BALBcJ_G0025387__Zmynd19	431.874	-0.459204	0.160301	-2.86463	0.00417498	0.0491253
MGP_BALBcJ_G0034735__Gm5617	101.528	0.55097	0.192492	2.8623	0.00420579	0.0494492
MGP_BALBcJ_G0028736__Mtf1	657.074	-0.36072	0.126039	-2.86197	0.00421011	0.0494614
MGP_BALBcJ_G0006238__AI504432	75.721	-1.42493	0.498016	-2.86122	0.00422013	0.0494635
MGP_BALBcJ_G0020448__Sirt5	278.703	0.415954	0.145356	2.86163	0.00421465	0.0494635
MGP_BALBcJ_G0032135__Klk6	15.2862	-2.82103	0.985911	-2.86134	0.00421853	0.0494635
MGP_BALBcJ_G0017723__Xpot	1605.86	-0.320485	0.112025	-2.86084	0.00422525	0.049485
MGP_BALBcJ_G0030884__Pole4	336.367	-0.390669	0.13665	-2.8589	0.00425118	0.04975
MGP_BALBcJ_G0031018__Klf15	227.218	1.37298	0.480297	2.85861	0.00425503	0.0497565
MGP_BALBcJ_G0016848__C130074G19Rik	2798.6	0.625645	0.218986	2.85702	0.00427645	0.0498629
MGP_BALBcJ_G0023088__Ezr	7229.36	-0.535048	0.18726	-2.85725	0.00427334	0.0498629
MGP_BALBcJ_G0027765__Slc25a24	567.93	-0.800415	0.280096	-2.85765	0.00426796	0.0498629
MGP_BALBcJ_G0034896__Fem1b	1765.1	-0.427396	0.149599	-2.85695	0.00427737	0.0498629
MGP_BALBcJ_G0033261__Tnfrsf22	176.252	-1.26205	0.441796	-2.85663	0.00428161	0.0498738
MGP_BALBcJ_G0026882__Ddx27	1068.27	-0.37389	0.130971	-2.85476	0.00430698	0.0500533
MGP_BALBcJ_G0027593__Polr3gl	478.208	0.351389	0.12307	2.8552	0.00430097	0.0500533
MGP_BALBcJ_G0032161__Napsa	92.8845	-1.55601	0.545057	-2.85476	0.00430696	0.0500533
MGP_BALBcJ_G0018967__NA	4636.01	-0.278246	0.0975098	-2.85352	0.00432377	0.0501511
MGP_BALBcJ_G0029072__Pramef12	73.9224	0.977633	0.34262	2.8534	0.00432538	0.0501511
MGP_BALBcJ_G0030305__Actb	39686	-0.331356	0.116121	-2.85354	0.00432347	0.0501511
MGP_BALBcJ_G0016670__Gm7694	1275.28	-0.508647	0.17838	-2.85148	0.0043516	0.0502618
MGP_BALBcJ_G0022671__Atp13a5	61.6189	1.62009	0.568116	2.85168	0.00434887	0.0502618
MGP_BALBcJ_G0026371__Wdr76	202.211	0.520664	0.182565	2.85195	0.00434526	0.0502618
MGP_BALBcJ_G0030990__Sec61a1	8263.28	-0.394662	0.138395	-2.85171	0.00434851	0.0502618
MGP_BALBcJ_G0034141__Atmin	1829.04	0.453438	0.15897	2.85234	0.00433981	0.0502618
MGP_BALBcJ_G0021922__Zfp41	115.747	0.587178	0.205951	2.85106	0.00435734	0.0502814
MGP_BALBcJ_G0022162__Ttc38	375.733	0.700058	0.24564	2.84993	0.00437283	0.0502814
MGP_BALBcJ_G0022374__Pfdn5	2282.21	0.247025	0.0866492	2.85086	0.00436009	0.0502814
MGP_BALBcJ_G0025637__Ptgs1	513.61	0.843597	0.296009	2.8499	0.00437331	0.0502814
MGP_BALBcJ_G0031416__Rerg	14.7553	1.55733	0.546348	2.85044	0.00436591	0.0502814
MGP_BALBcJ_G0034499__Tirap	1870.6	-0.366068	0.128446	-2.84998	0.00437216	0.0502814
MGP_BALBcJ_G0022023__Sh3bp1	325.92	-0.468643	0.16446	-2.84958	0.00437763	0.0502927
MGP_BALBcJ_G0017632__Kitl	2608.88	0.406919	0.142834	2.8489	0.00438713	0.0503372
MGP_BALBcJ_G0034536__Esam	848.268	-0.443598	0.155713	-2.84882	0.00438818	0.0503372
MGP_BALBcJ_G0006223__Gm12474	37.4863	1.31163	0.460545	2.84799	0.00439962	0.0504091
MGP_BALBcJ_G0027588__Fcgr1	303.12	-1.23117	0.432312	-2.84788	0.00440114	0.0504091
MGP_BALBcJ_G0029411__Plb1	689.959	0.906454	0.318357	2.84729	0.00440935	0.0504648
MGP_BALBcJ_G0036876__Gm11611	372.823	0.933903	0.328155	2.84592	0.0044284	0.0506444
MGP_BALBcJ_G0019014__Nr1d1	540.983	1.08792	0.382385	2.84509	0.00443988	0.0506987
MGP_BALBcJ_G0030151__Vps37d	28.3142	1.33947	0.470795	2.84511	0.00443956	0.0506987
MGP_BALBcJ_G0028253__Tex10	456.527	-0.294959	0.103699	-2.84438	0.00444986	0.0507743
MGP_BALBcJ_G0033070__Sec23ip	1406.71	-0.242318	0.0852061	-2.8439	0.00445651	0.0508116
MGP_BALBcJ_G0022742__Kpna1	1341.31	-0.283566	0.0997355	-2.84318	0.00446654	0.0508491
MGP_BALBcJ_G0035780__Pnck	83.6143	0.831121	0.292297	2.84341	0.00446331	0.0508491
MGP_BALBcJ_G0034333__Vstm5	117.775	1.07229	0.377228	2.84256	0.00447528	0.0509101
MGP_BALBcJ_G0002042__NA	12.9743	-1.57796	0.555329	-2.84149	0.00449035	0.051043
MGP_BALBcJ_G0020871__Zswim6	767.305	-0.435742	0.153364	-2.84122	0.00449418	0.0510481
MGP_BALBcJ_G0026994__Rtel1	476.408	0.292463	0.102956	2.84067	0.00450186	0.0510968
MGP_BALBcJ_G0032846__Adm	137.614	-0.800247	0.281736	-2.84041	0.00450555	0.0511001
MGP_BALBcJ_G0028123__Aqp7	258.809	1.2953	0.456079	2.84008	0.00451022	0.0511147
MGP_BALBcJ_G0035993__Gm6377	36.8748	-1.71524	0.604069	-2.83948	0.00451875	0.0511729
MGP_BALBcJ_G0000068__Ighv13-2	19.3577	6.93477	2.4429	2.83875	0.00452913	0.0512135
MGP_BALBcJ_G0025159__Poll	286.847	0.381992	0.134556	2.8389	0.0045269	0.0512135
MGP_BALBcJ_G0025689__Zeb2	1143.42	-0.929582	0.327521	-2.83824	0.00453631	0.0512562
MGP_BALBcJ_G0022629__Tmem41a	311.963	0.476888	0.168097	2.83698	0.00455427	0.0514206
MGP_BALBcJ_G0019175__Rundc3a	340.705	0.620303	0.218741	2.83579	0.00457119	0.0515408
MGP_BALBcJ_G0025266__Eif3a	9478.19	-0.261644	0.0922662	-2.83575	0.00457176	0.0515408
MGP_BALBcJ_G0019152__Arl4d	98.2577	0.76905	0.271244	2.83527	0.00457865	0.05158
MGP_BALBcJ_G0027637__Wdr3	959.95	-0.383085	0.135179	-2.83391	0.00459828	0.0517624
MGP_BALBcJ_G0030189__Cldn15	365.603	0.583141	0.205837	2.83303	0.00461091	0.0518659
MGP_BALBcJ_G0023146__Lix1	125.741	0.858245	0.303075	2.83179	0.0046288	0.0520282
MGP_BALBcJ_G0026608__Pygb	2444.68	0.463012	0.163551	2.83099	0.00464035	0.0521192
MGP_BALBcJ_G0025085__Entpd1	1501.55	-0.70082	0.247595	-2.83052	0.0046473	0.0521584
MGP_BALBcJ_G0022236__Slc38a2	5295.4	-0.500775	0.176961	-2.82987	0.00465669	0.0521861
MGP_BALBcJ_G0026213__Ccdc34	727.523	0.591579	0.209035	2.83005	0.00465411	0.0521861
MGP_BALBcJ_G0018025__Fam161a	72.803	1.13317	0.40059	2.82875	0.00467299	0.0523298
MGP_BALBcJ_G0021669__Egflam	190.116	0.674639	0.238567	2.82788	0.00468568	0.052433
MGP_BALBcJ_G0019277__Arsg	219.255	0.612992	0.216796	2.82751	0.00469123	0.0524561
MGP_BALBcJ_G0030908__Mob1a	3874.28	-0.265517	0.0939321	-2.82669	0.0047032	0.052551
MGP_BALBcJ_G0029871__Hscb	265.728	0.560145	0.198187	2.82634	0.00470833	0.0525693
MGP_BALBcJ_G0021739__Sdc2	753.595	0.376354	0.133216	2.82515	0.00472586	0.0527261
MGP_BALBcJ_G0026788__Srsf6	5669.1	-0.224694	0.0795579	-2.82428	0.0047387	0.0528302
MGP_BALBcJ_G0026451__Mertk	379.65	0.627286	0.222205	2.823	0.00475763	0.053002
MGP_BALBcJ_G0016797__Cnst	1917.83	0.75715	0.268259	2.82246	0.00476571	0.0530498
MGP_BALBcJ_G0025495__Mrps2	741.696	-0.325197	0.115227	-2.82224	0.00476896	0.0530498
MGP_BALBcJ_G0016333__Nifk	719.04	-0.440652	0.156232	-2.8205	0.00479494	0.0532995
MGP_BALBcJ_G0022659__P3h2	652.956	-0.505508	0.179257	-2.82002	0.00480204	0.0533166
MGP_BALBcJ_G0031887__Itpkc	478.549	-0.49647	0.176058	-2.81992	0.00480355	0.0533166
MGP_BALBcJ_G0030277__Tmem184a	969.822	0.373178	0.132349	2.81966	0.00480749	0.0533211
MGP_BALBcJ_G0018486__Eif4a1	13753.2	-0.36302	0.128762	-2.81931	0.00481276	0.0533402
MGP_BALBcJ_G0018800__Wfdc21	178.893	-0.57155	0.202785	-2.81851	0.00482477	0.0534341
MGP_BALBcJ_G0026462__Ckap2l	147.093	0.911915	0.32366	2.81751	0.00483977	0.0534999
MGP_BALBcJ_G0034233__Rhou	5396.84	0.374865	0.133042	2.81765	0.00483766	0.0534999
MGP_BALBcJ_G0034691__Tmem25	33.5277	1.17638	0.41754	2.8174	0.00484137	0.0534999
MGP_BALBcJ_G0036092__Rnf128	1138.01	0.494723	0.175618	2.81705	0.00484675	0.0535202
MGP_BALBcJ_G0031352__Ybx3	1531.46	-0.507603	0.180231	-2.8164	0.0048565	0.0535772
MGP_BALBcJ_G0033937__Cpne2	193.173	-1.13591	0.403342	-2.81623	0.00485902	0.0535772
MGP_BALBcJ_G0016584__Cacybp	901.481	-0.375776	0.133489	-2.81503	0.00487723	0.053582
MGP_BALBcJ_G0016956__Ltv1	678.746	-0.403285	0.143237	-2.81552	0.0048699	0.053582
MGP_BALBcJ_G0022085__Rangap1	1320.4	-0.402041	0.142785	-2.81572	0.00486684	0.053582
MGP_BALBcJ_G0029429__Fgfr3	73.7699	0.799951	0.284139	2.81536	0.00487232	0.053582
MGP_BALBcJ_G0035411__Myrip	46.9253	1.0032	0.356369	2.81506	0.00487678	0.053582
MGP_BALBcJ_G0030373__Flt1	1220.51	-0.535425	0.190411	-2.81194	0.00492436	0.0540603
MGP_BALBcJ_G0017912__Sec14l4	54.5536	1.06496	0.37927	2.80793	0.00498618	0.0544884
MGP_BALBcJ_G0022680__Tmem44	1139.34	0.793237	0.282539	2.80753	0.00499227	0.0544884
MGP_BALBcJ_G0022999__Urb1	543.761	-0.474768	0.169062	-2.80824	0.00498126	0.0544884
MGP_BALBcJ_G0025678__Olfml2a	160.339	0.772729	0.27523	2.80757	0.00499162	0.0544884
MGP_BALBcJ_G0026313__Rhov	168.508	-0.707919	0.252025	-2.80892	0.00497079	0.0544884
MGP_BALBcJ_G0026585__Nxt1	215.113	-0.443794	0.158044	-2.80805	0.00498422	0.0544884
MGP_BALBcJ_G0029234__Noc2l	1680.76	-0.423747	0.150918	-2.8078	0.00498807	0.0544884
MGP_BALBcJ_G0035013__Leo1	821.205	-0.309628	0.110277	-2.80774	0.00498907	0.0544884
MGP_BALBcJ_G0033759__Cherp	1341.05	-0.262541	0.0935384	-2.80677	0.00500411	0.0545781
MGP_BALBcJ_G0019811__Eif2s1	1471.8	-0.43542	0.155171	-2.80607	0.00501498	0.0546176
MGP_BALBcJ_G0031691__Arhgap35	4860.68	0.369679	0.131743	2.80607	0.00501496	0.0546176
MGP_BALBcJ_G0005429__Fam120aos	115.356	0.588111	0.209645	2.80528	0.00502732	0.0546731
MGP_BALBcJ_G0024741__Plcb3	1945.06	-0.247444	0.0882002	-2.80548	0.00502421	0.0546731
MGP_BALBcJ_G0020016__Serpina3n	2453.76	-1.34659	0.480063	-2.80503	0.00503125	0.0546763
MGP_BALBcJ_G0024526__Acaa2	1811.76	0.437286	0.155947	2.80407	0.00504612	0.0547282
MGP_BALBcJ_G0026290__Bmf	6589.96	0.464535	0.165667	2.80402	0.00504692	0.0547282
MGP_BALBcJ_G0032084__Tshz3	65.8543	-0.652422	0.232646	-2.80436	0.00504172	0.0547282
MGP_BALBcJ_G0021438__Kif13b	2797.26	0.463529	0.165413	2.80225	0.00507467	0.0547807
MGP_BALBcJ_G0023330__Haghl	367.308	0.468404	0.16713	2.80263	0.0050688	0.0547807
MGP_BALBcJ_G0027423__Hax1	873.152	-0.274083	0.0977897	-2.80278	0.00506648	0.0547807
MGP_BALBcJ_G0028932__Myom3	12.3058	1.62625	0.580392	2.80198	0.00507896	0.0547807
MGP_BALBcJ_G0029440__Rnf4	3052.34	-0.265246	0.0946677	-2.80186	0.00508084	0.0547807
MGP_BALBcJ_G0030546__Tmem140	732.709	0.500814	0.178701	2.80253	0.00507037	0.0547807
MGP_BALBcJ_G0035095__Tbc1d2b	797.261	-0.436341	0.155678	-2.80283	0.00506559	0.0547807
MGP_BALBcJ_G0035175__Nphp3	231.924	0.437683	0.156163	2.80273	0.00506722	0.0547807
MGP_BALBcJ_G0024475__NA	1276.39	0.494083	0.176373	2.80135	0.00508898	0.0547996
MGP_BALBcJ_G0029531__Rbpj	2678.2	-0.357628	0.127665	-2.80129	0.00508986	0.0547996
MGP_BALBcJ_G0016937__Zc3h12d	345.518	0.604956	0.215978	2.80101	0.00509437	0.054809
MGP_BALBcJ_G0033940__Arl2bp	250.736	0.560211	0.200037	2.80053	0.0051018	0.0548498
MGP_BALBcJ_G0033942__Ccl22	22.7961	-2.79776	0.999438	-2.79934	0.00512077	0.0550145
MGP_BALBcJ_G0028719__Heyl	97.949	0.689773	0.246491	2.79837	0.00513614	0.0551404
MGP_BALBcJ_G0030272__Zfand2a	2394.73	-0.608253	0.21742	-2.79759	0.00514849	0.0552249
MGP_BALBcJ_G0031471__Tm7sf3	2276.69	0.437592	0.156427	2.79741	0.00515134	0.0552249
MGP_BALBcJ_G0016962__Hivep2	869.763	-0.568396	0.203257	-2.79644	0.00516683	0.0552978
MGP_BALBcJ_G0020727__Rfesd	238.185	0.375487	0.134313	2.79561	0.00518016	0.0552978
MGP_BALBcJ_G0023122__Tcp1	3785.7	-0.234435	0.0838538	-2.79576	0.00517773	0.0552978
MGP_BALBcJ_G0030544__Cald1	4082.45	-0.617854	0.220936	-2.79653	0.00516552	0.0552978
MGP_BALBcJ_G0034002__Cbfb	1389.04	-0.260262	0.0930742	-2.79628	0.00516942	0.0552978
MGP_BALBcJ_G0035079__Zfp949	570.389	0.441876	0.158044	2.7959	0.00517551	0.0552978
MGP_BALBcJ_G0015443__5031434O11Rik	110.895	0.714761	0.255776	2.79448	0.00519828	0.055452
MGP_BALBcJ_G0015800__Crispld1	52.2906	0.975207	0.349098	2.7935	0.00521403	0.055463
MGP_BALBcJ_G0018772__Rad51d	496.531	0.484056	0.173254	2.79391	0.00520755	0.055463
MGP_BALBcJ_G0023249__Prss22	14.8827	-1.71612	0.614258	-2.7938	0.00520919	0.055463
MGP_BALBcJ_G0025231__Tcf7l2	1099.13	0.442988	0.158565	2.79373	0.00521038	0.055463
MGP_BALBcJ_G0032501__Prcp	764.059	0.400536	0.143456	2.79205	0.00523747	0.055673
MGP_BALBcJ_G0033201__Phrf1	1973.32	-0.261184	0.093558	-2.79168	0.00524358	0.0556987
MGP_BALBcJ_G0031467__Sspn	499.81	0.532554	0.190867	2.79018	0.00526784	0.055917
MGP_BALBcJ_G0032924__Cdr2	178.679	-0.792987	0.284234	-2.78991	0.00527225	0.0559245
MGP_BALBcJ_G0029410__Fosl2	3466.82	-0.614691	0.220397	-2.78902	0.00528682	0.0560396
MGP_BALBcJ_G0034705__Tmprss4	1763.12	0.732014	0.262585	2.78772	0.00530808	0.0562253
MGP_BALBcJ_G0026111__Spi1	295.011	-1.13165	0.406131	-2.78642	0.00532933	0.0563464
MGP_BALBcJ_G0026180__Fbxo3	3181	0.274064	0.0983585	2.78638	0.00532999	0.0563464
MGP_BALBcJ_G0029591__Nipal1	25.3258	-1.48082	0.531456	-2.78634	0.00533073	0.0563464
MGP_BALBcJ_G0025125__Slc25a28	896.548	-0.297693	0.106868	-2.78561	0.00534278	0.0563656
MGP_BALBcJ_G0027433__Dennd4b	470.664	-0.543259	0.19506	-2.78509	0.00535123	0.0563656
MGP_BALBcJ_G0027450__S100a6	1909.43	-0.616984	0.221506	-2.78541	0.00534602	0.0563656
MGP_BALBcJ_G0030063__Abcb9	270.127	0.518503	0.186165	2.78518	0.00534983	0.0563656
MGP_BALBcJ_G0033271__Ppfia1	2413.55	-0.386991	0.138951	-2.7851	0.00535115	0.0563656
MGP_BALBcJ_G0015917__Fhl2	182.065	-1.17278	0.421291	-2.78377	0.00537311	0.0564868
MGP_BALBcJ_G0016167__Fbxo36	204.267	0.783749	0.281548	2.78372	0.00537398	0.0564868
MGP_BALBcJ_G0026327__Tyro3	4188.55	0.659896	0.237022	2.78411	0.00536742	0.0564868
MGP_BALBcJ_G0020483__Fgd3	2385.57	-0.52048	0.186991	-2.78345	0.00537842	0.056494
MGP_BALBcJ_G0017811__Pa2g4	2132.72	-0.385094	0.138389	-2.78268	0.00539113	0.0565487
MGP_BALBcJ_G0029426__Slbp	377.66	-0.41102	0.147696	-2.78289	0.00538773	0.0565487
MGP_BALBcJ_G0017036__Arg1	676.457	-1.50715	0.541671	-2.7824	0.00539583	0.0565509
MGP_BALBcJ_G0021323__Mdp1	702.208	0.296391	0.10653	2.78222	0.00539884	0.0565509
MGP_BALBcJ_G0003530__Zeb2os	31.6216	-1.11749	0.401897	-2.78054	0.0054269	0.0567266
MGP_BALBcJ_G0028698__Rims3	254.948	0.628566	0.226026	2.78094	0.00542013	0.0567266
MGP_BALBcJ_G0035048__Myo6	3287.42	0.535211	0.192475	2.78068	0.00542453	0.0567266
MGP_BALBcJ_G0004452__Gm15635	47.1517	1.44238	0.518922	2.77957	0.00544309	0.0568504
MGP_BALBcJ_G0017809__Zc3h10	461.478	-0.305271	0.109834	-2.77938	0.00544629	0.0568504
MGP_BALBcJ_G0035257__Amigo3	53.8953	-0.934349	0.336214	-2.77903	0.00545216	0.0568723
MGP_BALBcJ_G0019963__Ccdc88c	789.965	0.380941	0.137148	2.7776	0.00547625	0.0570759
MGP_BALBcJ_G0021275__Prmt5	911.534	-0.356259	0.12827	-2.77742	0.00547925	0.0570759
MGP_BALBcJ_G0039819__NA	17.8976	-3.19432	1.15037	-2.77678	0.00548999	0.0571482
MGP_BALBcJ_G0026175__Abtb2	335.283	-0.794825	0.286296	-2.77624	0.00549918	0.0571659
MGP_BALBcJ_G0027270__Nmd3	572.818	-0.408356	0.147103	-2.77598	0.0055036	0.0571659
MGP_BALBcJ_G0029520__Dhx15	2986.6	-0.347882	0.125321	-2.77593	0.00550433	0.0571659
MGP_BALBcJ_G0033818__Gm10644	23.348	1.09297	0.393752	2.77578	0.00550686	0.0571659
MGP_BALBcJ_G0022857__Tfg	1622.95	-0.288581	0.104043	-2.77368	0.00554259	0.0574972
MGP_BALBcJ_G0035909__Igbp1	2478.62	0.462357	0.166778	2.77229	0.00556628	0.0577033
MGP_BALBcJ_G0031390__Crebl2	755.011	0.323024	0.116552	2.7715	0.00557985	0.0578041
MGP_BALBcJ_G0016164__Pid1	197.705	-1.05839	0.381952	-2.77099	0.00558857	0.0578259
MGP_BALBcJ_G0023263__Eci1	947.524	0.335112	0.120938	2.77093	0.00558962	0.0578259
MGP_BALBcJ_G0034762__Cryab	824.711	0.836705	0.302051	2.77008	0.00560419	0.0579369
MGP_BALBcJ_G0018104__Nudcd2	610.831	-0.290628	0.104937	-2.76955	0.00561332	0.0579517
MGP_BALBcJ_G0030933__Pradc1	246.657	0.408572	0.147517	2.76966	0.00561145	0.0579517
MGP_BALBcJ_G0019320__Fdxr	151.566	0.502155	0.181346	2.76904	0.00562218	0.0579638
MGP_BALBcJ_G0023956__Zbtb14	534.317	0.322288	0.116386	2.76914	0.0056205	0.0579638
MGP_BALBcJ_G0018251__P4ha2	433.902	-0.538273	0.194429	-2.76848	0.00563189	0.0579846
MGP_BALBcJ_G0020872__Smim15	737.921	-0.36558	0.132041	-2.76869	0.00562819	0.0579846
MGP_BALBcJ_G0021122__Fam35a	171.546	0.498242	0.180002	2.76797	0.0056406	0.0580346
MGP_BALBcJ_G0016835__Susd4	107.949	0.891499	0.32222	2.76674	0.00566198	0.0582149
MGP_BALBcJ_G0029589__Nfxl1	854.965	-0.367405	0.132826	-2.76607	0.00567371	0.0582957
MGP_BALBcJ_G0020507__Syk	898.821	-1.39938	0.50609	-2.76508	0.00569087	0.0583924
MGP_BALBcJ_G0025100__Rrp12	444.401	-0.60911	0.220275	-2.76523	0.00568826	0.0583924
MGP_BALBcJ_G0034537__Vsig2	149.512	-0.592161	0.214203	-2.76449	0.00570115	0.0584581
MGP_BALBcJ_G0024602__Acy3	80.3053	0.606323	0.219421	2.76329	0.00572223	0.0586343
MGP_BALBcJ_G0028642__Ipo13	785.317	-0.361759	0.130937	-2.76285	0.00572994	0.0586735
MGP_BALBcJ_G0019258__Gm10184	773.931	-0.345894	0.125271	-2.76116	0.00575962	0.0589374
MGP_BALBcJ_G0022488__Rsl1d1	1483.7	-0.34679	0.125607	-2.76092	0.00576392	0.0589414
MGP_BALBcJ_G0020542__Lman2	4230.32	-0.293152	0.106205	-2.76026	0.00577547	0.0590194
MGP_BALBcJ_G0019924__Alkbh1	542.121	-0.387648	0.140472	-2.7596	0.00578713	0.0590985
MGP_BALBcJ_G0016817__Ephx1	6246.59	0.478913	0.173568	2.75923	0.00579381	0.0591267
MGP_BALBcJ_G0022603__Yeats2	1016.77	0.235278	0.0852935	2.75845	0.00580767	0.059228
MGP_BALBcJ_G0024387__Hsd17b4	4067.3	0.332102	0.120467	2.75678	0.00583734	0.0594903
MGP_BALBcJ_G0026631__Trib3	487.459	-0.752072	0.272844	-2.75642	0.00584377	0.0595156
MGP_BALBcJ_G0028910__Stmn1	1086.11	0.766381	0.278127	2.7555	0.00586018	0.0596425
MGP_BALBcJ_G0015074__Mrln	11.6294	1.63854	0.594749	2.75502	0.0058689	0.0596909
MGP_BALBcJ_G0016884__Lpgat1	7470.34	-0.450405	0.163538	-2.75413	0.00588486	0.0597324
MGP_BALBcJ_G0027365__Paqr6	150.003	1.05987	0.384817	2.75422	0.00588325	0.0597324
MGP_BALBcJ_G0029206__Atad3a	1165.69	-0.334821	0.121563	-2.7543	0.00588181	0.0597324
MGP_BALBcJ_G0021799__Ebag9	312.337	0.424188	0.154046	2.75364	0.00589362	0.0597601
MGP_BALBcJ_G0031040__Adamts9	1256.9	-0.861742	0.312958	-2.75354	0.00589553	0.0597601
MGP_BALBcJ_G0015160__Gm11769	21.5169	-1.07257	0.389625	-2.75283	0.00590825	0.0598086
MGP_BALBcJ_G0021949__Oplah	2028.78	0.67155	0.243932	2.75302	0.00590477	0.0598086
MGP_BALBcJ_G0018563__Mis12	602.882	-0.330683	0.120153	-2.75218	0.00591999	0.0598872
MGP_BALBcJ_G0033798__Inpp4b	123.53	0.748368	0.272081	2.75053	0.00594985	0.060149
MGP_BALBcJ_G0022086__Zc3h7b	2123.77	0.272077	0.0989374	2.74999	0.00595964	0.0601964
MGP_BALBcJ_G0029947__Pxn	3031.32	-0.343091	0.124768	-2.74983	0.00596253	0.0601964
MGP_BALBcJ_G0018458__Per1	982.772	0.90782	0.330201	2.7493	0.00597236	0.0602149
MGP_BALBcJ_G0030683__Zfp775	43.7251	0.775383	0.282024	2.74935	0.0059714	0.0602149
MGP_BALBcJ_G0000117__Igkv10-96	2072.27	0.695061	0.252867	2.74872	0.00598279	0.0602798
MGP_BALBcJ_G0036227__Gpm6b	654.738	-0.385914	0.140425	-2.74818	0.00599272	0.0603395
MGP_BALBcJ_G0023012__Ifngr2	1522.35	-0.353973	0.128848	-2.74721	0.00601043	0.0604775
MGP_BALBcJ_G0026407__Eid1	1235.71	0.400208	0.145698	2.74683	0.00601748	0.060508
MGP_BALBcJ_G0024792__Eml3	2384.49	0.426538	0.155342	2.74579	0.0060365	0.0606184
MGP_BALBcJ_G0030717__Snx10	1397.92	0.501861	0.182766	2.74593	0.00603396	0.0606184
MGP_BALBcJ_G0029120__Rbp7	197.458	1.09628	0.399296	2.74554	0.00604115	0.0606247
MGP_BALBcJ_G0022522__Yars2	274.899	-0.435525	0.158657	-2.74508	0.0060497	0.0606297
MGP_BALBcJ_G0034439__Epor	52.9376	1.06902	0.389427	2.74511	0.00604913	0.0606297
MGP_BALBcJ_G0024936__Vps13a	964.038	0.279445	0.101831	2.7442	0.00606592	0.0607519
MGP_BALBcJ_G0021151__Sftpd	5620.11	0.500534	0.182434	2.74365	0.00607605	0.060813
MGP_BALBcJ_G0027111__Mfn1	2414.27	0.225993	0.0823891	2.74299	0.00608826	0.0608695
MGP_BALBcJ_G0029124__Clstn1	7865.69	0.541852	0.197547	2.74291	0.00608977	0.0608695
MGP_BALBcJ_G0028745__Snip1	435.405	-0.302056	0.110189	-2.74124	0.00612075	0.0611157
MGP_BALBcJ_G0033270__Cttn	7758.76	-0.271712	0.0991234	-2.74115	0.00612252	0.0611157
MGP_BALBcJ_G0019454__Arhgdia	8766.4	-0.226802	0.0827613	-2.74044	0.00613569	0.0612066
MGP_BALBcJ_G0021689__Brix1	779.625	-0.374816	0.136824	-2.73941	0.00615505	0.0613591
MGP_BALBcJ_G0034205__Aprt	600.28	-0.413952	0.151175	-2.73823	0.0061771	0.0615383
MGP_BALBcJ_G0019304__Gprc5c	850.3	0.415161	0.151653	2.73758	0.00618933	0.0616194
MGP_BALBcJ_G0024957__Tmem2	800.405	-0.568875	0.207819	-2.73736	0.00619348	0.06162
MGP_BALBcJ_G0016263__Gpc1	440.915	-0.568071	0.207717	-2.73483	0.00624117	0.061833
MGP_BALBcJ_G0018015__Wdpcp	174.139	0.407289	0.148979	2.73387	0.00625949	0.061833
MGP_BALBcJ_G0019957__Nrde2	466.066	0.430693	0.157503	2.73451	0.00624738	0.061833
MGP_BALBcJ_G0022055__Cbx6	1568.12	0.508116	0.185815	2.73452	0.00624718	0.061833
MGP_BALBcJ_G0023833__Nfya	1329.62	-0.349587	0.127874	-2.73384	0.00626001	0.061833
MGP_BALBcJ_G0026173__Elf5	16239.1	0.476421	0.174259	2.73398	0.0062574	0.061833
MGP_BALBcJ_G0027413__Pygo2	1130.55	-0.262839	0.0961418	-2.73387	0.00625951	0.061833
MGP_BALBcJ_G0029395__Ppm1g	2118.99	-0.212826	0.0778421	-2.73407	0.00625569	0.061833
MGP_BALBcJ_G0029580__Guf1	617.02	0.282445	0.103302	2.73418	0.00625366	0.061833
MGP_BALBcJ_G0033210__Pddc1	546.805	0.262501	0.0959682	2.73529	0.00623246	0.061833
MGP_BALBcJ_G0035078__Syncrip	3361.36	-0.328397	0.120103	-2.73428	0.0062516	0.061833
MGP_BALBcJ_G0020161__Gtpbp4	1050.37	-0.485891	0.177754	-2.7335	0.00626656	0.0618571
MGP_BALBcJ_G0024935__Gna14	318.845	0.652872	0.238878	2.73307	0.00627462	0.0618962
MGP_BALBcJ_G0027544__Sema6c	82.7881	0.716231	0.262095	2.73271	0.00628149	0.0619012
MGP_BALBcJ_G0033435__Ap3m2	499.594	0.563143	0.206082	2.73262	0.00628335	0.0619012
MGP_BALBcJ_G0018209__Hnrnpab	7768.52	-0.214797	0.0786213	-2.73204	0.00629435	0.0619691
MGP_BALBcJ_G0032562__Relt	47.9018	-1.63911	0.600401	-2.73002	0.00633308	0.0623097
MGP_BALBcJ_G0016021__Nrp2	829.527	-0.768724	0.281614	-2.72971	0.00633902	0.0623275
MGP_BALBcJ_G0021577__Dach1	89.503	0.751206	0.275272	2.72896	0.00635345	0.0623731
MGP_BALBcJ_G0026145__Cd82	5641.65	0.323799	0.118668	2.72861	0.00636021	0.0623731
MGP_BALBcJ_G0034206__Galns	952.516	0.502976	0.184324	2.72875	0.00635739	0.0623731
MGP_BALBcJ_G0034530__Slc37a2	314.943	-1.73835	0.636944	-2.72921	0.00634868	0.0623731
MGP_BALBcJ_G0015424__Snhg17	695.363	-0.437935	0.160544	-2.72781	0.00637565	0.0624432
MGP_BALBcJ_G0029262__Adam22	78.9574	1.11857	0.410043	2.72792	0.00637341	0.0624432
MGP_BALBcJ_G0024846__Ms4a4c	105.748	-1.51856	0.556994	-2.72634	0.00640401	0.0625584
MGP_BALBcJ_G0026576__Kiz	558.341	0.387792	0.142224	2.72662	0.00639868	0.0625584
MGP_BALBcJ_G0027371__Lmna	5218.92	-0.41095	0.150715	-2.72667	0.00639772	0.0625584
MGP_BALBcJ_G0033378__Cln8	481.519	-0.347366	0.127407	-2.72643	0.00640227	0.0625584
MGP_BALBcJ_G0035117__Atp1b3	2124.03	-0.438658	0.160929	-2.72579	0.00641486	0.0626238
MGP_BALBcJ_G0022534__Sdf2l1	666.127	-0.950003	0.348652	-2.72479	0.00643422	0.0627682
MGP_BALBcJ_G0032385__Pex11a	1358.22	0.364574	0.133808	2.7246	0.00643798	0.0627682
MGP_BALBcJ_G0030718__Skap2	1365.8	-0.273662	0.100466	-2.72393	0.00645096	0.0628542
MGP_BALBcJ_G0018730__Lyrm9	334.004	0.346502	0.127234	2.72336	0.00646225	0.0629186
MGP_BALBcJ_G0028971__Ece1	3992.92	-0.367194	0.134841	-2.72317	0.00646592	0.0629186
MGP_BALBcJ_G0001351__NA	28.4667	1.00763	0.370069	2.72282	0.00647266	0.0629434
MGP_BALBcJ_G0028216__Polr1e	196.148	-0.455169	0.167196	-2.72236	0.00648166	0.0629904
MGP_BALBcJ_G0034974__Sltm	3284.41	-0.347387	0.127624	-2.72195	0.00648979	0.0630288
MGP_BALBcJ_G0018179__Tbc1d9b	3573.87	0.394659	0.145025	2.72131	0.00650235	0.0631101
MGP_BALBcJ_G0016718__Pex19	1762.96	0.275565	0.101316	2.71985	0.00653119	0.0633492
MGP_BALBcJ_G0025714__Nr4a2	65.8253	-0.89926	0.330923	-2.71743	0.00657912	0.063732
MGP_BALBcJ_G0029148__Klhl21	1785	-0.257708	0.0948288	-2.71761	0.00657553	0.063732
MGP_BALBcJ_G0021974__Gpt	605.655	0.741491	0.27299	2.71618	0.006604	0.0638919
MGP_BALBcJ_G0031986__Zfp146	1275.52	-0.341028	0.125554	-2.71618	0.0066041	0.0638919
MGP_BALBcJ_G0017479__Eef2	49267.2	0.260549	0.0959362	2.71586	0.00661039	0.0639118
MGP_BALBcJ_G0020645__Mterf3	539.292	-0.34628	0.127551	-2.71483	0.00663101	0.0640316
MGP_BALBcJ_G0032992__NA	839.531	-0.240786	0.0886935	-2.71482	0.00663128	0.0640316
MGP_BALBcJ_G0033198__Lrrc56	169.77	0.511166	0.188349	2.71393	0.00664911	0.0641627
MGP_BALBcJ_G0022531__Ypel1	162.859	0.743743	0.27421	2.71231	0.00668169	0.0644358
MGP_BALBcJ_G0020531__Tspan17	1831.36	0.478049	0.176431	2.70955	0.00673743	0.0649317
MGP_BALBcJ_G0017432__Dazap1	1396.75	-0.210048	0.0775765	-2.70762	0.00677681	0.0652279
MGP_BALBcJ_G0022762__Hcls1	724.579	-0.943947	0.348625	-2.70763	0.00677657	0.0652279
MGP_BALBcJ_G0006687__5430416N02Rik	151.388	-0.522255	0.192936	-2.70688	0.00679197	0.0652634
MGP_BALBcJ_G0017080__Tspyl4	145.713	0.658088	0.243124	2.7068	0.00679349	0.0652634
MGP_BALBcJ_G0021430__Pinx1	227.097	-0.409616	0.151315	-2.70705	0.0067885	0.0652634
MGP_BALBcJ_G0028455__Kank4	86.077	0.854138	0.315645	2.70601	0.00680972	0.0653777
MGP_BALBcJ_G0030847__Polr1a	965.765	-0.399208	0.147541	-2.70574	0.00681529	0.0653895
MGP_BALBcJ_G0016912__Akap12	865.567	-0.555704	0.20543	-2.70507	0.00682892	0.065437
MGP_BALBcJ_G0035003__Wdr72	111.611	0.670535	0.247875	2.70513	0.00682782	0.065437
MGP_BALBcJ_G0029761__Sec31a	3870.91	-0.19894	0.0735895	-2.70338	0.00686389	0.0657302
MGP_BALBcJ_G0019652__Dnajb9	2365.8	-0.747145	0.276477	-2.70237	0.00688469	0.0658876
MGP_BALBcJ_G0028013__Gdf6	50.1295	-1.91953	0.710407	-2.70202	0.00689206	0.0659162
MGP_BALBcJ_G0027788__Agl	992.286	0.259326	0.0960486	2.69994	0.00693513	0.0662861
MGP_BALBcJ_G0027619__Notch2	1832.16	-0.47309	0.175279	-2.69908	0.00695325	0.0664172
MGP_BALBcJ_G0023369__Crebrf	2050.11	0.485034	0.179917	2.69588	0.00702022	0.0670144
MGP_BALBcJ_G0025725__Pkp4	1791.69	-0.369217	0.136979	-2.69543	0.00702984	0.0670638
MGP_BALBcJ_G0028139__Rpp25l	272.474	-0.430298	0.15971	-2.69424	0.00705497	0.0672184
MGP_BALBcJ_G0033460__Plpp5	780.486	-0.305979	0.113565	-2.69431	0.00705336	0.0672184
MGP_BALBcJ_G0004332__Gm15987	37.922	-1.14792	0.426207	-2.69334	0.00707402	0.0673148
MGP_BALBcJ_G0034781__Exph5	455.796	0.744331	0.276344	2.69349	0.00707078	0.0673148
MGP_BALBcJ_G0017534__Ckap4	510.591	-0.888801	0.330039	-2.69302	0.00708077	0.0673366
MGP_BALBcJ_G0032176__Fuz	356.365	0.439772	0.16333	2.69253	0.00709113	0.0673925
MGP_BALBcJ_G0017931__Nipsnap1	183.016	0.577425	0.214529	2.69159	0.00711123	0.067541
MGP_BALBcJ_G0029986__Rasal1	1162.36	0.436548	0.162229	2.69095	0.00712497	0.0675438
MGP_BALBcJ_G0034165__Atp2c2	13676.6	0.866469	0.321977	2.69109	0.00712189	0.0675438
MGP_BALBcJ_G0039497__Snord14d	49.6771	-1.33843	0.497381	-2.69095	0.00712492	0.0675438
MGP_BALBcJ_G0018152__Olfr56	38.8649	0.952403	0.354015	2.69029	0.00713897	0.067634
MGP_BALBcJ_G0030794__Abcg2	3353.19	0.589788	0.219279	2.68967	0.0071522	0.0676742
MGP_BALBcJ_G0034897__Cln6	1049.11	0.436151	0.162154	2.68974	0.00715087	0.0676742
MGP_BALBcJ_G0002000__NA	199.633	0.45539	0.169359	2.68891	0.00716864	0.0677023
MGP_BALBcJ_G0019614__Ccdc71l	312.115	-0.44064	0.163871	-2.68894	0.00716788	0.0677023
MGP_BALBcJ_G0023810__Bysl	441.068	-0.637845	0.237184	-2.68925	0.00716136	0.0677023
MGP_BALBcJ_G0019360__Fbf1	1156.95	0.357911	0.133156	2.68792	0.00718993	0.0678609
MGP_BALBcJ_G0019762__Rtn1	122.364	0.579975	0.215846	2.68698	0.00721004	0.0679656
MGP_BALBcJ_G0029934__Unc119b	936.122	-0.286485	0.106613	-2.68715	0.00720653	0.0679656
MGP_BALBcJ_G0023010__Il10rb	767.689	-0.437606	0.162905	-2.68627	0.00722554	0.0680266
MGP_BALBcJ_G0034259__Sipa1l2	243.514	-0.69432	0.258465	-2.68632	0.00722429	0.0680266
MGP_BALBcJ_G0035280__Wdr6	1423.89	0.344069	0.128109	2.68576	0.00723661	0.0680882
MGP_BALBcJ_G0022361__Krt8	13783.8	-0.535457	0.199401	-2.68532	0.00724601	0.0681342
MGP_BALBcJ_G0017209__Slc29a3	2379.52	0.361438	0.13464	2.68447	0.00726445	0.0682454
MGP_BALBcJ_G0019766__Dhrs7	1450.12	0.449951	0.167619	2.68436	0.00726689	0.0682454
MGP_BALBcJ_G0007494__NA	217.832	0.678397	0.25279	2.68364	0.00728251	0.0683495
MGP_BALBcJ_G0019468__Dcxr	2258.56	0.752413	0.2804	2.68336	0.0072887	0.068365
MGP_BALBcJ_G0034980__Aldh1a2	21.1869	-1.25992	0.469595	-2.683	0.00729644	0.068395
MGP_BALBcJ_G0016423__Ppp1r15b	3155.28	-0.21099	0.0786495	-2.68266	0.00730398	0.0684231
MGP_BALBcJ_G0022568__Rtn4r	44.7554	-1.19944	0.447155	-2.68238	0.00731001	0.0684371
MGP_BALBcJ_G0005829__Gm13391	18.6854	-2.20206	0.821305	-2.68117	0.00733648	0.0686423
MGP_BALBcJ_G0034763__1110032A03Rik	542.556	0.466526	0.174033	2.68069	0.00734715	0.0686995
MGP_BALBcJ_G0016810__Acbd3	1452.83	-0.291248	0.108658	-2.68041	0.00735323	0.0687137
MGP_BALBcJ_G0018176__Mapk9	2154.26	0.254675	0.0950361	2.67977	0.00736731	0.0687175
MGP_BALBcJ_G0025191__Pcgf6	377.958	-0.303362	0.113187	-2.68017	0.00735839	0.0687175
MGP_BALBcJ_G0032499__Rab30	234.027	0.713862	0.266384	2.67983	0.00736604	0.0687175
MGP_BALBcJ_G0022167__Cerk	567.275	-0.7303	0.272619	-2.67883	0.00738799	0.0688678
MGP_BALBcJ_G0027340__Pear1	385.686	-0.435899	0.162745	-2.67842	0.00739698	0.0689089
MGP_BALBcJ_G0020431__Pak1ip1	814.033	-0.395534	0.147718	-2.67763	0.00741455	0.06903
MGP_BALBcJ_G0024933__Cep78	200.86	0.437628	0.163455	2.67736	0.00742057	0.0690434
MGP_BALBcJ_G0032285__Zdhhc13	388.204	-0.502546	0.187726	-2.67702	0.00742808	0.0690706
MGP_BALBcJ_G0016753__Mndal	396.782	-0.561802	0.209892	-2.67662	0.00743691	0.0691101
MGP_BALBcJ_G0029459__Htra3	698.421	0.595322	0.222502	2.67558	0.00745997	0.069239
MGP_BALBcJ_G0032509__Thrsp	7132	1.25364	0.468542	2.67562	0.00745901	0.069239
MGP_BALBcJ_G0035313__Nme6	258.045	-0.417955	0.156234	-2.67519	0.00746871	0.0692774
MGP_BALBcJ_G0034731__NA	24.5186	1.01925	0.381141	2.67421	0.0074906	0.0694378
MGP_BALBcJ_G0028779__Gjb3	45.37	-1.61139	0.603048	-2.67207	0.0075385	0.0698389
MGP_BALBcJ_G0033520__6430573F11Rik	122.829	0.757272	0.283482	2.67133	0.00755524	0.0699509
MGP_BALBcJ_G0028065__Fbxl4	695.432	0.333028	0.1247	2.67063	0.00757101	0.070011
MGP_BALBcJ_G0028641__Dph2	186.741	-0.669331	0.250626	-2.67063	0.00757084	0.070011
MGP_BALBcJ_G0022323__Smagp	634.277	0.408335	0.152975	2.66929	0.00760128	0.0702478
MGP_BALBcJ_G0016143__NA	120.039	0.645424	0.241869	2.66849	0.00761939	0.0703719
MGP_BALBcJ_G0031128__Pparg	349.481	0.55222	0.207058	2.66698	0.00765356	0.0706443
MGP_BALBcJ_G0023112__Map3k4	1294.21	0.241889	0.090711	2.66659	0.00766245	0.0706831
MGP_BALBcJ_G0025708__Fmnl2	756.076	-0.496473	0.186279	-2.66521	0.00769393	0.07093
MGP_BALBcJ_G0030746__NA	3874.33	0.475068	0.178278	2.66476	0.00770439	0.070983
MGP_BALBcJ_G0017459__Sf3a2	795.662	-0.32098	0.120469	-2.66442	0.0077122	0.0710116
MGP_BALBcJ_G0033608__Mfap3l	1344.01	0.37287	0.140038	2.66264	0.00775311	0.0713447
MGP_BALBcJ_G0022424__Slx4	476.052	-0.311978	0.117197	-2.662	0.00776785	0.0713963
MGP_BALBcJ_G0022584__Cdc45	42.4695	-0.706869	0.265542	-2.66198	0.00776819	0.0713963
MGP_BALBcJ_G0022209__Cpne8	1650.46	-0.258426	0.0971166	-2.66099	0.00779113	0.0715635
MGP_BALBcJ_G0035112__Pls1	20.0692	1.193	0.44841	2.66051	0.0078023	0.0716224
MGP_BALBcJ_G0029192__Prkcz	518.746	0.375619	0.141203	2.66014	0.00781083	0.0716571
MGP_BALBcJ_G0029783__Nudt9	1157.8	-0.377895	0.142083	-2.65967	0.00782171	0.0717133
MGP_BALBcJ_G0021385__Phf11d	342.579	0.397084	0.149363	2.65851	0.00784863	0.0718727
MGP_BALBcJ_G0028143__Galt	580.38	0.352128	0.132443	2.6587	0.00784418	0.0718727
MGP_BALBcJ_G0026904__Atp9a	2218.34	0.355836	0.133922	2.65705	0.00788281	0.0721418
MGP_BALBcJ_G0032212__Ruvbl2	533.597	-0.409966	0.15433	-2.65642	0.00789742	0.0721879
MGP_BALBcJ_G0032353__Igf1r	340.815	-0.730668	0.275043	-2.65656	0.00789434	0.0721879
MGP_BALBcJ_G0028125__Nol6	1103.77	-0.298249	0.112313	-2.65553	0.0079185	0.0723367
MGP_BALBcJ_G0027348__Isg20l2	830.423	-0.310617	0.116997	-2.65492	0.0079327	0.0723786
MGP_BALBcJ_G0030501__Fam71f2	21.7574	-1.38383	0.521223	-2.65496	0.00793177	0.0723786
MGP_BALBcJ_G0017740__Mettl1	366.933	-0.693964	0.261517	-2.65361	0.00796367	0.0726173
MGP_BALBcJ_G0021651__AW549877	2356.51	0.214831	0.0809857	2.6527	0.00798497	0.0727675
MGP_BALBcJ_G0017183__Gcc2	1114.16	0.223514	0.0842836	2.65193	0.00800341	0.0728915
MGP_BALBcJ_G0029135__Rere	5211.35	0.391007	0.14756	2.64981	0.00805378	0.0731734
MGP_BALBcJ_G0031191__Bid	492.939	-0.483087	0.18227	-2.6504	0.0080397	0.0731734
MGP_BALBcJ_G0033859__Prdx2	4369.69	0.308267	0.116332	2.64989	0.00805184	0.0731734
MGP_BALBcJ_G0035497__Tfe3	1602.47	-0.29934	0.112959	-2.64999	0.00804932	0.0731734
MGP_BALBcJ_G0029110__Tardbp	5510.58	-0.222099	0.0838731	-2.64803	0.00809618	0.0735143
MGP_BALBcJ_G0025394__Nrarp	89.4779	-0.621253	0.234646	-2.64762	0.00810615	0.0735605
MGP_BALBcJ_G0027808__Dnttip2	1007.06	-0.27094	0.102355	-2.64705	0.00811971	0.0736392
MGP_BALBcJ_G0006874__NA	86.1118	0.583651	0.220522	2.64669	0.00812847	0.0736394
MGP_BALBcJ_G0017668__Kcnc2	28.5911	1.32384	0.500197	2.64664	0.0081295	0.0736394
MGP_BALBcJ_G0029160__Rnf207	247.047	0.629158	0.237741	2.6464	0.00813532	0.0736479
MGP_BALBcJ_G0000065__Ighv3-6	971.807	0.914902	0.34588	2.64514	0.00816574	0.0737867
MGP_BALBcJ_G0018961__Scrn2	322.232	0.382932	0.144773	2.64505	0.0081678	0.0737867
MGP_BALBcJ_G0021481__Slc25a37	954.349	-0.523884	0.19806	-2.64508	0.00816708	0.0737867
MGP_BALBcJ_G0024033__Cox7a2l	3267.83	0.283762	0.107284	2.64495	0.00817024	0.0737867
MGP_BALBcJ_G0030631__Zyx	3536.01	-0.525054	0.19853	-2.64471	0.00817613	0.0737957
MGP_BALBcJ_G0021379__Micu2	858.827	0.249637	0.0944128	2.6441	0.0081908	0.0738838
MGP_BALBcJ_G0024469__Fech	1135.62	0.313487	0.118619	2.64281	0.00822223	0.074123
MGP_BALBcJ_G0015924__Tex30	93.1729	-0.544453	0.206064	-2.64215	0.00823813	0.0742219
MGP_BALBcJ_G0028725__Akirin1	242.131	-0.427238	0.161757	-2.64124	0.00826041	0.0743783
MGP_BALBcJ_G0030237__Zfp113	827.26	0.329816	0.124882	2.64102	0.00826567	0.0743812
MGP_BALBcJ_G0015761__Rrs1	226.471	-0.567267	0.214841	-2.64041	0.00828066	0.0744426
MGP_BALBcJ_G0022244__Slc48a1	4285.29	0.296237	0.112205	2.64013	0.00828732	0.0744426
MGP_BALBcJ_G0036215__Ace2	14.6697	1.42846	0.541051	2.64015	0.00828682	0.0744426
MGP_BALBcJ_G0035031__Ick	1238.74	0.344684	0.13061	2.63903	0.00831428	0.0746404
MGP_BALBcJ_G0021107__Arhgap22	110.764	-0.849978	0.322211	-2.63796	0.00834069	0.074668
MGP_BALBcJ_G0023829__Treml2	39.1075	-3.26272	1.23693	-2.63776	0.00834545	0.074668
MGP_BALBcJ_G0025093__Pik3ap1	690.516	-0.799013	0.302976	-2.63722	0.00835897	0.074668
MGP_BALBcJ_G0025576__Dnm1	377.826	0.57945	0.219644	2.63813	0.00833646	0.074668
MGP_BALBcJ_G0027244__Ssr3	8072.91	-0.32554	0.123447	-2.63709	0.00836194	0.074668
MGP_BALBcJ_G0028344__Col27a1	312.004	-0.445345	0.168782	-2.63858	0.00832534	0.074668
MGP_BALBcJ_G0029266__Abcb1a	163.218	0.563546	0.21366	2.63758	0.00835005	0.074668
MGP_BALBcJ_G0035062__Tpbg	193.538	-0.697565	0.26449	-2.6374	0.00835453	0.074668
MGP_BALBcJ_G0035669__Enox2	393.291	0.451754	0.17124	2.63814	0.00833622	0.074668
MGP_BALBcJ_G0000040__Igkj4	62.0449	-1.17234	0.444769	-2.63585	0.00839272	0.0748623
MGP_BALBcJ_G0023846__Satb1	628.103	0.394962	0.149845	2.63581	0.00839364	0.0748623
MGP_BALBcJ_G0024374__Fem1c	1150.56	-0.324376	0.123103	-2.635	0.00841367	0.0749966
MGP_BALBcJ_G0018859__Dynll2	4629.92	0.413201	0.15686	2.63421	0.00843343	0.075084
MGP_BALBcJ_G0032444__Mesdc1	437.052	-0.410086	0.155673	-2.63428	0.00843161	0.075084
MGP_BALBcJ_G0015960__Stk17b	535.484	-0.779232	0.295838	-2.63399	0.00843891	0.0750884
MGP_BALBcJ_G0016032__Klf7	2279.66	-0.534729	0.203071	-2.63322	0.00845808	0.0752145
MGP_BALBcJ_G0017602__Fgd6	1367.4	-0.260354	0.0988954	-2.63262	0.00847293	0.0752578
MGP_BALBcJ_G0032868__Copb1	3935.31	-0.209502	0.0795773	-2.63269	0.00847117	0.0752578
MGP_BALBcJ_G0033240__Tnni2	17.9016	-1.18583	0.450516	-2.63217	0.0084841	0.0753126
MGP_BALBcJ_G0011048__NA	272.899	-0.347115	0.13198	-2.63006	0.0085369	0.0755927
MGP_BALBcJ_G0017664__Krr1	747.637	-0.296292	0.112688	-2.62931	0.00855577	0.0755927
MGP_BALBcJ_G0018770__Lig3	2888.18	0.202654	0.0770415	2.63046	0.00852697	0.0755927
MGP_BALBcJ_G0020482__Susd3	117.106	0.630364	0.239634	2.63053	0.00852525	0.0755927
MGP_BALBcJ_G0021618__Dzip1	103.369	0.708206	0.269292	2.62988	0.00854147	0.0755927
MGP_BALBcJ_G0022009__Mpst	405.902	0.304522	0.115814	2.62942	0.00855309	0.0755927
MGP_BALBcJ_G0022627__Ehhadh	1874.92	0.526398	0.200201	2.62935	0.00855477	0.0755927
MGP_BALBcJ_G0031777__Cblc	909.32	0.434887	0.165357	2.62998	0.0085389	0.0755927
MGP_BALBcJ_G0023228__Tnfrsf12a	2040.44	-0.562593	0.214037	-2.62849	0.00857649	0.0757314
MGP_BALBcJ_G0022435__Vasn	425.796	-0.459488	0.174829	-2.62821	0.00858352	0.075749
MGP_BALBcJ_G0017700__Mdm2	2449.65	-0.39757	0.151311	-2.6275	0.00860145	0.0758629
MGP_BALBcJ_G0017477__Zbtb7a	1744.32	-0.278051	0.105838	-2.62714	0.00861064	0.0758917
MGP_BALBcJ_G0024525__Myo5b	2307.2	-0.505636	0.192495	-2.62675	0.00862055	0.0758917
MGP_BALBcJ_G0025047__Ppp1r3c	564.032	0.778284	0.2963	2.62667	0.00862239	0.0758917
MGP_BALBcJ_G0029940__Dynll1	1065.03	-0.428836	0.163268	-2.62658	0.00862485	0.0758917
MGP_BALBcJ_G0027017__NA	973.282	-0.344345	0.131116	-2.62626	0.00863294	0.0759185
MGP_BALBcJ_G0017385__Mier2	414.835	-0.301048	0.114804	-2.62229	0.00873413	0.0765849
MGP_BALBcJ_G0019905__Ift43	670.008	0.24296	0.0926421	2.62256	0.00872708	0.0765849
MGP_BALBcJ_G0024629__Rhod	261.539	-0.39114	0.14913	-2.6228	0.00872096	0.0765849
MGP_BALBcJ_G0024785__Uqcc3	546.321	0.365606	0.139397	2.62276	0.00872195	0.0765849
MGP_BALBcJ_G0031157__Cxcl12	2100.73	-0.786162	0.299784	-2.62242	0.00873066	0.0765849
MGP_BALBcJ_G0023781__Cul9	625.367	0.479934	0.183048	2.6219	0.00874413	0.0766281
MGP_BALBcJ_G0030153__Tbl2	720.482	-0.35022	0.133599	-2.62142	0.00875635	0.0766906
MGP_BALBcJ_G0021685__Prlr	5267.4	0.310086	0.118347	2.62015	0.00878909	0.0769326
MGP_BALBcJ_G0017082__Frk	1385.48	0.465247	0.177595	2.61971	0.00880042	0.0769871
MGP_BALBcJ_G0024593__1810055G02Rik	377.021	-0.471595	0.18005	-2.61925	0.00881232	0.0770465
MGP_BALBcJ_G0000106__Igkv1-122	280.543	-0.780385	0.297969	-2.61901	0.00881845	0.0770518
MGP_BALBcJ_G0027959__Fubp1	3546.98	-0.375792	0.143496	-2.61883	0.00882316	0.0770518
MGP_BALBcJ_G0033256__Slc22a18	542.949	0.859844	0.328376	2.61848	0.00883228	0.0770868
MGP_BALBcJ_G0022484__Litaf	7958.36	-0.273142	0.104333	-2.61799	0.00884502	0.0771509
MGP_BALBcJ_G0023999__Heatr5b	1050.06	0.232845	0.0889468	2.6178	0.00884986	0.0771509
MGP_BALBcJ_G0016963__Adgrg6	200.228	0.48986	0.187185	2.61698	0.00887115	0.0772918
MGP_BALBcJ_G0019089__Krt17	877.627	-0.910441	0.347993	-2.61626	0.00888988	0.07736
MGP_BALBcJ_G0033909__NA	677.842	-0.334581	0.127894	-2.61609	0.00889437	0.07736
MGP_BALBcJ_G0034429__Ldlr	311.398	-0.661887	0.252983	-2.61633	0.00888815	0.07736
MGP_BALBcJ_G0017959__Ddx56	819.798	-0.305431	0.116776	-2.61553	0.00890889	0.0774416
MGP_BALBcJ_G0024002__Eif2ak2	1541.57	0.196837	0.0752944	2.61423	0.00894292	0.0776925
MGP_BALBcJ_G0026459__Polr1b	529.973	-0.430642	0.164834	-2.61258	0.00898618	0.0780235
MGP_BALBcJ_G0022492__Cpped1	1617.67	0.266323	0.101972	2.61171	0.00900896	0.0781762
MGP_BALBcJ_G0026174__Cat	5196.72	0.513129	0.196535	2.61087	0.0090311	0.0782782
MGP_BALBcJ_G0035425__Zfp651	966.01	0.527076	0.201874	2.61091	0.00903014	0.0782782
MGP_BALBcJ_G0025580__Ptges2	665.905	-0.321304	0.1231	-2.61011	0.00905137	0.0784088
MGP_BALBcJ_G0029041__Dnajc16	1287.83	0.259703	0.0995292	2.60932	0.00907234	0.0785453
MGP_BALBcJ_G0015974__Plcl1	307.375	0.446518	0.171176	2.60853	0.00909311	0.07868
MGP_BALBcJ_G0031259__Zfp384	1438.2	-0.209241	0.0802328	-2.60793	0.00910916	0.0787736
MGP_BALBcJ_G0031472__Med21	528.851	-0.314399	0.120595	-2.60706	0.00913239	0.0789292
MGP_BALBcJ_G0001441__NA	11.6483	-1.82204	0.69947	-2.60488	0.00919054	0.0793408
MGP_BALBcJ_G0034288__Dync2h1	476.911	0.346886	0.133161	2.60501	0.00918712	0.0793408
MGP_BALBcJ_G0016251__Hdac4	629.76	-0.445002	0.171017	-2.60209	0.00926567	0.0799436
MGP_BALBcJ_G0015045__B230216N24Rik	40.9378	-0.905377	0.348088	-2.601	0.00929525	0.0800156
MGP_BALBcJ_G0024786__Lbhd1	63.6204	-0.684468	0.263135	-2.60121	0.00928965	0.0800156
MGP_BALBcJ_G0030833__Thnsl2	217.429	0.514395	0.197752	2.60121	0.00928951	0.0800156
MGP_BALBcJ_G0034193__Banp	549.787	-0.524773	0.201752	-2.60107	0.00929323	0.0800156
MGP_BALBcJ_G0030661__Tpk1	429.327	0.385727	0.148359	2.59995	0.00932371	0.0802148
MGP_BALBcJ_G0024407__Aldh7a1	1295.78	0.392134	0.150876	2.59904	0.00934849	0.0803821
MGP_BALBcJ_G0024679__Snx32	144.998	0.663246	0.255211	2.59882	0.00935451	0.080388
MGP_BALBcJ_G0029432__Nelfa	522.54	-0.274719	0.105752	-2.59776	0.00938336	0.0805899
MGP_BALBcJ_G0020332__Gpld1	107.596	0.674063	0.259525	2.5973	0.00939602	0.0806227
MGP_BALBcJ_G0022854__Senp7	663.795	0.279003	0.107432	2.59704	0.00940322	0.0806227
MGP_BALBcJ_G0027064__Pde7a	1903.06	-0.386114	0.148666	-2.59719	0.00939898	0.0806227
MGP_BALBcJ_G0023093__Rps6ka2	81.0358	-0.987877	0.38067	-2.5951	0.00945634	0.0810301
MGP_BALBcJ_G0028361__Brinp1	41.3075	-1.48614	0.572749	-2.59475	0.00946584	0.0810301
MGP_BALBcJ_G0031103__Cidec	1895.64	0.431504	0.166301	2.59472	0.00946686	0.0810301
MGP_BALBcJ_G0035230__Rassf1	1650.31	-0.452104	0.174307	-2.59372	0.00949432	0.0811729
MGP_BALBcJ_G0035825__F8	91.7716	0.834235	0.321613	2.59391	0.00948913	0.0811729
MGP_BALBcJ_G0021277__Ajuba	572.461	-0.463112	0.178594	-2.5931	0.00951142	0.0812731
MGP_BALBcJ_G0020813__Arhgef28	299.928	0.420326	0.162116	2.59275	0.00952126	0.081311
MGP_BALBcJ_G0018014__Mdh1	5136.01	0.266817	0.102986	2.59081	0.00957493	0.0816555
MGP_BALBcJ_G0032578__Anapc15	787.837	0.359107	0.138613	2.59071	0.00957785	0.0816555
MGP_BALBcJ_G0034988__Tex9	111.046	0.563836	0.217612	2.59102	0.00956928	0.0816555
MGP_BALBcJ_G0022571__Ranbp1	885.327	-0.440269	0.17001	-2.58967	0.00960679	0.0817692
MGP_BALBcJ_G0029137__Errfi1	4089.52	-0.896787	0.346297	-2.58965	0.00960746	0.0817692
MGP_BALBcJ_G0039787__NA	921.545	0.258349	0.0997573	2.58978	0.00960373	0.0817692
MGP_BALBcJ_G0024544__Haus1	150.365	0.466227	0.180083	2.58896	0.00962651	0.0818851
MGP_BALBcJ_G0018330__Guk1	718.697	0.293894	0.11359	2.58733	0.00967219	0.0821045
MGP_BALBcJ_G0018481__Sat2	77.1888	0.667602	0.257995	2.58766	0.00966313	0.0821045
MGP_BALBcJ_G0018798__Wfdc17	12602.1	0.774678	0.299464	2.58688	0.00968499	0.0821045
MGP_BALBcJ_G0020902__Snx18	1680.96	-0.245298	0.0948177	-2.58705	0.00968014	0.0821045
MGP_BALBcJ_G0030985__Rpn1	6404.37	-0.304709	0.117789	-2.58691	0.00968417	0.0821045
MGP_BALBcJ_G0032001__Tyrobp	940.888	-0.959864	0.370953	-2.58756	0.00966584	0.0821045
MGP_BALBcJ_G0024348__Tcerg1	1271.16	-0.328146	0.126882	-2.58624	0.00970302	0.0821891
MGP_BALBcJ_G0034224__Fanca	74.5598	0.881404	0.340819	2.58614	0.00970588	0.0821891
MGP_BALBcJ_G0030218__Agfg2	663.456	0.468052	0.181013	2.58574	0.00971716	0.0822385
MGP_BALBcJ_G0033679__Cope	2407.48	-0.174806	0.0676351	-2.58455	0.00975068	0.0824758
MGP_BALBcJ_G0021000__Plau	1085.66	-0.70899	0.274344	-2.58431	0.00975736	0.0824861
MGP_BALBcJ_G0025154__Sfxn3	3600.33	0.371849	0.143933	2.58348	0.00978085	0.0826383
MGP_BALBcJ_G0028792__Ak2	1834.13	-0.420917	0.162945	-2.58319	0.00978904	0.0826611
MGP_BALBcJ_G0023035__Chaf1b	269.186	0.567435	0.219681	2.583	0.00979466	0.0826624
MGP_BALBcJ_G0016571__Angptl1	15.3364	1.92861	0.74691	2.58212	0.00981951	0.0828257
MGP_BALBcJ_G0022639__Dnajb11	2355.63	-0.423527	0.164093	-2.58102	0.00985084	0.0829971
MGP_BALBcJ_G0032127__Klk14	26.0571	1.03657	0.401608	2.58105	0.00985016	0.0829971
MGP_BALBcJ_G0024161__Zfp35	502.616	-0.335063	0.129852	-2.58034	0.00987017	0.083067
MGP_BALBcJ_G0030541__Akr1b10	643.19	0.271078	0.105053	2.58039	0.00986896	0.083067
MGP_BALBcJ_G0018809__Aatf	446.73	-0.396536	0.153734	-2.57937	0.00989818	0.0831359
MGP_BALBcJ_G0019955__Kcnk13	34.7483	-1.22661	0.47556	-2.57929	0.00990042	0.0831359
MGP_BALBcJ_G0025562__Exosc2	342.149	-0.391133	0.151642	-2.57931	0.0098998	0.0831359
MGP_BALBcJ_G0028437__Jun	1451.67	-1.23726	0.479618	-2.57969	0.00988893	0.0831359
MGP_BALBcJ_G0016459__Ptpn7	113.914	-1.31956	0.511702	-2.57876	0.00991561	0.083201
MGP_BALBcJ_G0026291__Bub1b	117.495	0.644979	0.250124	2.57863	0.00991921	0.083201
MGP_BALBcJ_G0027644__Cd101	23.3027	-2.63655	1.02266	-2.57813	0.00993363	0.0832294
MGP_BALBcJ_G0034652__Tmem136	31.0672	0.979181	0.379789	2.57823	0.00993089	0.0832294
MGP_BALBcJ_G0024772__Wdr74	575.767	-0.384837	0.149306	-2.57751	0.0099516	0.0833336
MGP_BALBcJ_G0016914__Rmnd1	424.348	0.279182	0.108344	2.57682	0.00997145	0.0834403
MGP_BALBcJ_G0022040__Tmem184b	1199.63	-0.357584	0.138777	-2.57668	0.00997541	0.0834403
MGP_BALBcJ_G0022043__Kdelr3	264.413	-0.481347	0.186849	-2.57613	0.00999135	0.0835272
MGP_BALBcJ_G0032433__Adamtsl3	42.8066	-0.914991	0.35521	-2.57592	0.00999745	0.0835319
MGP_BALBcJ_G0023229__Cldn6	35.144	1.35662	0.52679	2.57525	0.0100167	0.0836079
MGP_BALBcJ_G0028848__Taf12	476.033	-0.261816	0.101667	-2.57522	0.0100176	0.0836079
MGP_BALBcJ_G0021692__Rai14	1337.7	-0.441963	0.171749	-2.5733	0.0100734	0.0839839
MGP_BALBcJ_G0025820__Hoxd10	29.4284	1.14051	0.443211	2.57328	0.0100738	0.0839839
MGP_BALBcJ_G0015224__A330035P11Rik	41.2896	0.943569	0.366837	2.57218	0.0101062	0.0840565
MGP_BALBcJ_G0016601__Mettl13	547.68	-0.255071	0.0991557	-2.57243	0.0100988	0.0840565
MGP_BALBcJ_G0018820__Appbp2	1571.96	-0.219926	0.085507	-2.57203	0.0101104	0.0840565
MGP_BALBcJ_G0026783__Lpin3	559.738	0.394277	0.153289	2.57212	0.0101079	0.0840565
MGP_BALBcJ_G0034107__Aars	3159.09	-0.220712	0.0857926	-2.57262	0.0100932	0.0840565
MGP_BALBcJ_G0017294__Lrrc75b	1255.86	0.62102	0.241531	2.57118	0.0101353	0.0842167
MGP_BALBcJ_G0029949__Gcn1l1	3589.15	-0.238505	0.0927865	-2.57047	0.0101561	0.0843431
MGP_BALBcJ_G0033619__Tll1	63.1333	-1.11653	0.434482	-2.5698	0.0101758	0.0844601
MGP_BALBcJ_G0017332__Pofut2	1388.51	-0.273811	0.106612	-2.56829	0.0102201	0.0847097
MGP_BALBcJ_G0033047__Bckdk	1511.11	0.314079	0.122295	2.5682	0.0102227	0.0847097
MGP_BALBcJ_G0035421__Vipr1	4474.04	0.723604	0.281716	2.56856	0.0102122	0.0847097
MGP_BALBcJ_G0018860__Srsf1	4513.65	-0.231369	0.0901232	-2.56725	0.0102508	0.0848962
MGP_BALBcJ_G0015947__Nab1	2013.95	-0.358015	0.139478	-2.56681	0.0102638	0.0849568
MGP_BALBcJ_G0025410__Lrrc26	147.203	1.15401	0.449741	2.56594	0.0102898	0.0851252
MGP_BALBcJ_G0021774__Klf10	2270.56	-0.495966	0.193371	-2.56485	0.0103222	0.0853461
MGP_BALBcJ_G0035046__Filip1	109.076	0.533969	0.208217	2.56448	0.010333	0.0853886
MGP_BALBcJ_G0019648__Zfp277	484.141	0.253988	0.0990555	2.5641	0.0103445	0.08539
MGP_BALBcJ_G0035219__Rbm15b	1457.3	-0.300755	0.117294	-2.56411	0.0103441	0.08539
MGP_BALBcJ_G0010638__NA	166.765	-0.410007	0.160064	-2.56152	0.0104215	0.0856987
MGP_BALBcJ_G0020154__Pfkp	816.285	-0.587034	0.229121	-2.56211	0.0104039	0.0856987
MGP_BALBcJ_G0020772__Cmya5	218.267	0.656208	0.256173	2.56158	0.0104198	0.0856987
MGP_BALBcJ_G0023971__Fam179a	35.9905	-1.52472	0.595115	-2.56206	0.0104052	0.0856987
MGP_BALBcJ_G0027361__Cct3	3054.29	-0.34323	0.133995	-2.56152	0.0104217	0.0856987
MGP_BALBcJ_G0027842__Egf	382.078	0.760985	0.296954	2.56264	0.010388	0.0856987
MGP_BALBcJ_G0031960__Psmd8	4046.79	0.228036	0.0890148	2.56178	0.0104137	0.0856987
MGP_BALBcJ_G0031861__Ccdc97	1263.66	-0.248908	0.0971824	-2.56125	0.0104298	0.0857185
MGP_BALBcJ_G0015946__Gls	1924.17	-0.322832	0.126078	-2.56058	0.0104499	0.0858371
MGP_BALBcJ_G0020739__Lysmd3	531.409	-0.444921	0.173803	-2.55992	0.0104697	0.0859531
MGP_BALBcJ_G0018518__Acadvl	3956.28	0.245048	0.0957475	2.55932	0.0104878	0.0860549
MGP_BALBcJ_G0020103__Cdca4	480.574	-0.360073	0.140726	-2.55869	0.0105069	0.0861181
MGP_BALBcJ_G0033569__Primpol	469.184	0.447861	0.175036	2.55868	0.0105069	0.0861181
MGP_BALBcJ_G0029747__Antxr2	375.827	-0.673058	0.263108	-2.5581	0.0105245	0.086215
MGP_BALBcJ_G0032370__Mrps11	250.919	-0.30625	0.119731	-2.55782	0.0105331	0.0862385
MGP_BALBcJ_G0018381__B9d1	161.113	0.490228	0.191676	2.55759	0.01054	0.0862482
MGP_BALBcJ_G0019469__Cbr2	1777.2	0.465833	0.182153	2.55738	0.0105464	0.086254
MGP_BALBcJ_G0019257__Smurf2	1693.93	-0.2311	0.09042	-2.55584	0.010593	0.0865415
MGP_BALBcJ_G0024496__Ptpn2	1376.81	-0.499688	0.195495	-2.55601	0.0105881	0.0865415
MGP_BALBcJ_G0019455__Alyref	553.446	-0.366957	0.143602	-2.55538	0.0106073	0.0865641
MGP_BALBcJ_G0022279__Kmt2d	5050.54	-0.250808	0.0981446	-2.5555	0.0106036	0.0865641
MGP_BALBcJ_G0031897__Sertad1	404.784	-0.492566	0.19278	-2.55507	0.0106166	0.0865935
MGP_BALBcJ_G0021315__Emc9	194.542	0.487496	0.19089	2.5538	0.0106554	0.0868398
MGP_BALBcJ_G0025161__Fbxw4	1421.16	0.29538	0.115667	2.5537	0.0106584	0.0868398
MGP_BALBcJ_G0018063__Stc2	333.239	0.5529	0.216768	2.55065	0.0107521	0.0875089
MGP_BALBcJ_G0032291__Prmt3	371.293	-0.49277	0.19318	-2.55084	0.0107465	0.0875089
MGP_BALBcJ_G0033692__Isyna1	2137.79	-0.41951	0.164484	-2.55046	0.0107581	0.0875107
MGP_BALBcJ_G0017180__Smpdl3a	2760.7	0.349627	0.137135	2.5495	0.0107878	0.0877047
MGP_BALBcJ_G0000095__Igkv1-135	585.081	-0.998635	0.391806	-2.5488	0.0108095	0.0877993
MGP_BALBcJ_G0017680__Tspan8	288.583	0.545935	0.214213	2.54856	0.0108169	0.0877993
MGP_BALBcJ_G0023452__Wdr4	576.998	-0.235267	0.0923078	-2.54873	0.0108117	0.0877993
MGP_BALBcJ_G0032701__Trim30a	304.883	-0.625135	0.245324	-2.54821	0.0108278	0.0878407
MGP_BALBcJ_G0021522__Itm2b	36355	0.370936	0.145597	2.54769	0.0108438	0.087923
MGP_BALBcJ_G0032543__Spcs2	2955.29	-0.39093	0.153513	-2.54656	0.0108792	0.0881624
MGP_BALBcJ_G0017643__Tmtc2	653.244	0.72885	0.286259	2.54612	0.0108928	0.0882254
MGP_BALBcJ_G0033088__Acadsb	2208.82	0.293436	0.11528	2.54541	0.010915	0.0883577
MGP_BALBcJ_G0017576__Ano4	275.717	0.832963	0.327377	2.54436	0.0109479	0.0885289
MGP_BALBcJ_G0035812__Fam3a	1300.39	0.350258	0.137651	2.54453	0.0109424	0.0885289
MGP_BALBcJ_G0022266__Ccnt1	1792.08	-0.271953	0.106962	-2.54252	0.0110057	0.0889488
MGP_BALBcJ_G0005634__Dubr	188.595	-0.612065	0.240798	-2.54182	0.0110276	0.0890302
MGP_BALBcJ_G0024342__Sh3rf2	22.4992	1.33607	0.525605	2.54197	0.0110229	0.0890302
MGP_BALBcJ_G0020914__Emb	336.567	-0.806018	0.317179	-2.54121	0.0110469	0.0890903
MGP_BALBcJ_G0031020__Slc41a3	94.7279	0.556425	0.218948	2.54136	0.0110423	0.0890903
MGP_BALBcJ_G0018172__Flt4	229.722	0.512696	0.201811	2.54048	0.0110701	0.0892118
MGP_BALBcJ_G0018690__Abhd15	96.0611	0.772931	0.30426	2.54036	0.0110738	0.0892118
MGP_BALBcJ_G0019433__Enthd2	459.773	-0.29747	0.117154	-2.53914	0.0111124	0.0894751
MGP_BALBcJ_G0021472__Dock5	710.952	-0.448358	0.176625	-2.53847	0.0111338	0.0895998
MGP_BALBcJ_G0027573__Plekho1	643.048	-0.684389	0.269768	-2.53695	0.0111822	0.0899408
MGP_BALBcJ_G0020421__Snrnp48	422.74	-0.361521	0.14255	-2.53609	0.0112097	0.0900657
MGP_BALBcJ_G0021560__Naa16	406.616	-0.299001	0.117895	-2.53617	0.0112072	0.0900657
MGP_BALBcJ_G0031468__Itpr2	3918.14	0.456884	0.180169	2.53586	0.011217	0.090077
MGP_BALBcJ_G0024696__Slc25a45	769.945	0.506542	0.199774	2.53557	0.0112264	0.090104
MGP_BALBcJ_G0025779__Ssb	2185.26	-0.288495	0.113801	-2.53507	0.0112424	0.0901845
MGP_BALBcJ_G0025158__Btrc	328.56	0.298194	0.117647	2.53465	0.0112561	0.0902465
MGP_BALBcJ_G0017306__Derl3	259.018	-1.01948	0.402332	-2.53393	0.011279	0.0903661
MGP_BALBcJ_G0023611__Ddr1	4164.93	0.677614	0.267429	2.53381	0.011283	0.0903661
MGP_BALBcJ_G0016465__Lmod1	863.488	0.635131	0.250737	2.53305	0.0113075	0.0904657
MGP_BALBcJ_G0025809__Gpr155	169.329	0.519842	0.205218	2.53313	0.011305	0.0904657
MGP_BALBcJ_G0028654__Tmem125	319.061	-0.439664	0.17364	-2.53204	0.01134	0.0906777
MGP_BALBcJ_G0019725__Rpl36al	2501.59	-0.327459	0.129353	-2.53151	0.0113574	0.0907278
MGP_BALBcJ_G0029361__Hadha	8543.5	0.278704	0.110102	2.53132	0.0113634	0.0907278
MGP_BALBcJ_G0030715__Hnrnpa2b1	10561.9	-0.25096	0.0991428	-2.53129	0.0113643	0.0907278
MGP_BALBcJ_G0004747__Gm27028	45.3913	0.840359	0.332061	2.53074	0.0113823	0.0907756
MGP_BALBcJ_G0030262__Dnaaf5	280.086	-0.340651	0.134597	-2.53089	0.0113772	0.0907756
MGP_BALBcJ_G0026137__Mapk8ip1	391.622	0.521097	0.20596	2.53009	0.0114033	0.0908945
MGP_BALBcJ_G0024417__Slc12a2	7977.26	0.442294	0.174915	2.52862	0.0114513	0.0912287
MGP_BALBcJ_G0031398__Fam234b	2916.76	0.605964	0.239709	2.52791	0.0114744	0.0913649
MGP_BALBcJ_G0020036__Papola	5058.74	-0.193392	0.0765189	-2.52738	0.0114918	0.0914548
MGP_BALBcJ_G0015744__Xkr4	95.4961	0.976408	0.386372	2.52712	0.0115004	0.0914748
MGP_BALBcJ_G0029982__Iqcd	20.3996	1.49122	0.59019	2.52668	0.0115145	0.0915389
MGP_BALBcJ_G0028227__Stra6l	105.371	-1.60971	0.637195	-2.52625	0.0115289	0.091605
MGP_BALBcJ_G0018499__Nlgn2	822.613	-0.350909	0.13892	-2.52597	0.0115379	0.0916288
MGP_BALBcJ_G0032974__Cln3	2006.02	0.26511	0.104994	2.525	0.0115699	0.0918342
MGP_BALBcJ_G0025527__Zer1	1236.35	0.400654	0.158714	2.52438	0.0115901	0.0918386
MGP_BALBcJ_G0026979__Ythdf1	1688.57	-0.264637	0.104838	-2.52424	0.0115948	0.0918386
MGP_BALBcJ_G0031159__Zfp239	937.685	0.500755	0.198356	2.52453	0.0115855	0.0918386
MGP_BALBcJ_G0033694__Lrrc25	151.101	-1.18383	0.468944	-2.52446	0.0115877	0.0918386
MGP_BALBcJ_G0016247__Per2	810.984	0.665571	0.263721	2.52377	0.0116105	0.0919145
MGP_BALBcJ_G0024749__Stip1	1837.09	-0.378991	0.150227	-2.52278	0.0116431	0.0921237
MGP_BALBcJ_G0023352__Decr2	519.278	0.366639	0.145411	2.5214	0.0116888	0.0924375
MGP_BALBcJ_G0018485__Cd68	1463.66	-0.83304	0.330417	-2.52118	0.0116962	0.0924476
MGP_BALBcJ_G0003245__Gm16136	605.039	0.498346	0.197749	2.52009	0.0117323	0.0926841
MGP_BALBcJ_G0028712__Mycl	65.7272	0.627915	0.249294	2.51877	0.0117765	0.0929357
MGP_BALBcJ_G0032856__Mical2	1317.8	-0.283315	0.112476	-2.5189	0.0117723	0.0929357
MGP_BALBcJ_G0019154__Etv4	26.7621	-1.54025	0.611655	-2.51816	0.0117968	0.0929987
MGP_BALBcJ_G0029219__Acap3	880.224	-0.271519	0.10782	-2.51827	0.0117933	0.0929987
MGP_BALBcJ_G0021652__Oxct1	2767.05	0.453527	0.180144	2.51758	0.0118165	0.0931054
MGP_BALBcJ_G0018385__Fam83g	219.824	-0.638101	0.253508	-2.51709	0.011833	0.0931256
MGP_BALBcJ_G0027735__Gstm4	211.439	0.47564	0.188968	2.51704	0.0118347	0.0931256
MGP_BALBcJ_G0028019__Ints8	972.488	-0.260375	0.103449	-2.51695	0.0118376	0.0931256
MGP_BALBcJ_G0015082__Gm12592	11.0863	1.74547	0.693633	2.51642	0.0118554	0.0931683
MGP_BALBcJ_G0019120__Coasy	1353.2	0.242229	0.0962565	2.5165	0.0118528	0.0931683
MGP_BALBcJ_G0016402__Pm20d1	155.331	0.683928	0.27184	2.51592	0.0118722	0.0932518
MGP_BALBcJ_G0016004__Fzd7	2136.82	-0.471561	0.187545	-2.51439	0.011924	0.0933312
MGP_BALBcJ_G0018129__Adam19	321.415	-0.515024	0.204813	-2.51461	0.0119163	0.0933312
MGP_BALBcJ_G0019656__Nova1	139.192	0.573202	0.227974	2.51434	0.0119257	0.0933312
MGP_BALBcJ_G0020487__Ecm2	154.145	0.839306	0.333782	2.51454	0.0119189	0.0933312
MGP_BALBcJ_G0023492__Adamts10	626.132	0.34186	0.135933	2.51491	0.0119063	0.0933312
MGP_BALBcJ_G0023951__Lama1	980.66	0.543056	0.215926	2.51501	0.0119029	0.0933312
MGP_BALBcJ_G0031854__Atp5sl	743.824	0.328832	0.130762	2.51474	0.0119119	0.0933312
MGP_BALBcJ_G0032959__D430042O09Rik	1004.53	0.209294	0.0832738	2.51333	0.0119599	0.0935501
MGP_BALBcJ_G0021213__Ttc5	667.63	0.234714	0.0933975	2.51307	0.0119686	0.0935698
MGP_BALBcJ_G0017596__Snrpf	191.563	-0.559245	0.222587	-2.51248	0.0119885	0.0936203
MGP_BALBcJ_G0024890__Lpxn	113.243	-0.910115	0.362255	-2.51236	0.0119926	0.0936203
MGP_BALBcJ_G0031879__Cyp2f2	1142.47	0.524405	0.208732	2.51233	0.0119937	0.0936203
MGP_BALBcJ_G0036032__Sytl4	94.1665	0.744424	0.296418	2.5114	0.0120254	0.0938193
MGP_BALBcJ_G0019827__NA	675.058	-0.24765	0.0986265	-2.51099	0.0120394	0.0938796
MGP_BALBcJ_G0022100__Ccdc134	367.199	-0.329076	0.131067	-2.51075	0.0120476	0.0938952
MGP_BALBcJ_G0029109__Masp2	76.3797	-1.04416	0.415917	-2.5105	0.0120561	0.0939093
MGP_BALBcJ_G0032932__Scnn1g	316.876	0.809992	0.322664	2.51033	0.0120619	0.0939093
MGP_BALBcJ_G0003780__4933431E20Rik	1115.24	0.416134	0.165832	2.50936	0.0120949	0.0941181
MGP_BALBcJ_G0016154__Col4a4	30.9197	1.03951	0.414393	2.50852	0.0121239	0.0942465
MGP_BALBcJ_G0016404__Rab29	334.974	0.31424	0.125264	2.50863	0.0121202	0.0942465
MGP_BALBcJ_G0025067__Plce1	989.504	0.411577	0.164126	2.50769	0.0121523	0.0944184
MGP_BALBcJ_G0018210__Nhp2	670.941	-0.373181	0.14884	-2.50727	0.0121668	0.0944821
MGP_BALBcJ_G0022599__B3gnt5	31.7137	-2.67943	1.06922	-2.50596	0.0122118	0.0947504
MGP_BALBcJ_G0025247__Gfra1	151.551	-1.32082	0.527084	-2.5059	0.0122139	0.0947504
MGP_BALBcJ_G0036219__Piga	278.656	-0.519371	0.207295	-2.50548	0.0122287	0.0948162
MGP_BALBcJ_G0022635__Etv5	273.631	-0.781331	0.311917	-2.50493	0.0122475	0.0949136
MGP_BALBcJ_G0019228__Tanc2	1935.46	0.389759	0.155719	2.50297	0.0123157	0.0952459
MGP_BALBcJ_G0027421__Il6ra	3952.81	0.593224	0.236995	2.5031	0.0123109	0.0952459
MGP_BALBcJ_G0035167__Srprb	764.25	-0.391859	0.156546	-2.50316	0.0123091	0.0952459
MGP_BALBcJ_G0035572__Uxt	311.557	0.305852	0.122177	2.50336	0.0123019	0.0952459
MGP_BALBcJ_G0020325__Fam65b	215.525	-0.987373	0.394735	-2.50136	0.0123718	0.0954473
MGP_BALBcJ_G0029444__Add1	4010.12	0.22572	0.0902354	2.50146	0.0123683	0.0954473
MGP_BALBcJ_G0030705__Fam221a	155.401	0.565279	0.225969	2.50157	0.0123642	0.0954473
MGP_BALBcJ_G0033477__Adgra2	288.127	-0.927448	0.370784	-2.50131	0.0123734	0.0954473
MGP_BALBcJ_G0034828__Imp3	206.463	-0.396629	0.15854	-2.50176	0.0123576	0.0954473
MGP_BALBcJ_G0032288__Nav2	683.148	-0.799218	0.319572	-2.5009	0.0123878	0.0955094
MGP_BALBcJ_G0016346__Dbi	9991.71	0.517371	0.206968	2.49976	0.0124276	0.0957676
MGP_BALBcJ_G0031466__Bhlhe41	3298.99	-0.48778	0.195154	-2.49947	0.0124381	0.0957991
MGP_BALBcJ_G0004318__NA	17.9862	1.89776	0.759618	2.49831	0.0124787	0.0960628
MGP_BALBcJ_G0035276__Qrich1	2100.54	-0.164165	0.0657389	-2.49723	0.0125168	0.0963075
MGP_BALBcJ_G0031538__Tmem150b	16.1907	1.10239	0.441498	2.49693	0.0125274	0.0963397
MGP_BALBcJ_G0020223__Zkscan4	40.9878	0.765189	0.306529	2.4963	0.0125497	0.0964125
MGP_BALBcJ_G0024110__Snrpd1	537.458	-0.414802	0.166155	-2.49648	0.0125433	0.0964125
MGP_BALBcJ_G0017338__Ube2g2	945.466	-0.325056	0.130231	-2.49599	0.0125607	0.0964477
MGP_BALBcJ_G0025775__Ppig	1969.63	-0.18283	0.073264	-2.49549	0.0125783	0.0965343
MGP_BALBcJ_G0017431__Gamt	73.205	0.71038	0.284688	2.49529	0.0125855	0.0965397
MGP_BALBcJ_G0025403__Rnf208	67.1227	0.592628	0.237565	2.4946	0.01261	0.0965804
MGP_BALBcJ_G0027414__Pbxip1	4551.08	0.282612	0.113284	2.49473	0.0126053	0.0965804
MGP_BALBcJ_G0034149__Sdr42e1	871.074	0.457724	0.183469	2.49483	0.0126018	0.0965804
MGP_BALBcJ_G0025493__Ppp1r26	311.56	0.348019	0.139548	2.4939	0.0126348	0.0967211
MGP_BALBcJ_G0021619__Dnajc3	5182.02	-0.41838	0.167796	-2.49339	0.0126529	0.0968108
MGP_BALBcJ_G0018146__NA	806.364	0.455401	0.182693	2.49271	0.0126772	0.0969478
MGP_BALBcJ_G0005050__Gm37168	17.8231	-1.76938	0.709953	-2.49224	0.0126939	0.0969766
MGP_BALBcJ_G0018974__Srcin1	1249.99	0.66384	0.266346	2.4924	0.0126884	0.0969766
MGP_BALBcJ_G0017822__Tmem198b	351.217	0.328501	0.13185	2.49147	0.0127217	0.0971227
MGP_BALBcJ_G0023991__Ttc27	285.659	-0.432544	0.173618	-2.49135	0.0127259	0.0971227
MGP_BALBcJ_G0018326__Trim11	2181.83	-0.300841	0.120784	-2.49074	0.0127476	0.0972393
MGP_BALBcJ_G0022690__Pigz	11.689	1.43266	0.575298	2.4903	0.0127636	0.0972865
MGP_BALBcJ_G0028060__Tstd3	104.179	0.520296	0.208937	2.49021	0.0127667	0.0972865
MGP_BALBcJ_G0017630__Gad1-ps	19.7855	-1.91735	0.770091	-2.48976	0.0127828	0.0973555
MGP_BALBcJ_G0024641__Ccs	539.247	0.263624	0.10589	2.4896	0.0127887	0.0973555
MGP_BALBcJ_G0029450__Rgs12	439.897	0.550139	0.221002	2.48929	0.0127998	0.0973909
MGP_BALBcJ_G0024685__Rela	1734.82	-0.289749	0.116413	-2.48897	0.0128115	0.097431
MGP_BALBcJ_G0020794__F2r	562.676	0.473503	0.190263	2.48868	0.0128219	0.0974603
MGP_BALBcJ_G0027878__Ube2d3	6686.23	-0.188459	0.0757679	-2.48733	0.0128708	0.0977828
MGP_BALBcJ_G0027441__S100a1	3498.56	0.378894	0.152351	2.48698	0.0128834	0.0978294
MGP_BALBcJ_G0023980__Ehd3	1173.13	0.447064	0.17978	2.48673	0.0128922	0.0978471
MGP_BALBcJ_G0028075__Epha7	34.3961	-1.14211	0.459414	-2.486	0.0129187	0.0979985
MGP_BALBcJ_G0025740__NA	535.459	0.543846	0.218797	2.48562	0.0129324	0.0980535
MGP_BALBcJ_G0022415__Zfp263	1047.4	-0.279825	0.1127	-2.48292	0.0130309	0.098701
MGP_BALBcJ_G0031075__Trnt1	683.172	-0.288728	0.116285	-2.48294	0.0130304	0.098701
MGP_BALBcJ_G0025492__Olfm1	199.45	-0.81141	0.326835	-2.48263	0.0130416	0.0987324
MGP_BALBcJ_G0028540__Cc2d1b	1838.16	0.202169	0.0814429	2.48234	0.0130521	0.0987624
MGP_BALBcJ_G0032299__Svip	268.908	0.350755	0.141352	2.48143	0.0130855	0.0989653
MGP_BALBcJ_G0033755__Klf2	188.148	-0.740401	0.298401	-2.48123	0.0130931	0.0989728
MGP_BALBcJ_G0018452__Pfas	535.532	-0.350167	0.141148	-2.48086	0.0131067	0.0990263
MGP_BALBcJ_G0015963__Gtf3c3	596.561	0.278467	0.112295	2.47977	0.0131466	0.0990615
MGP_BALBcJ_G0015968__Hspd1	2608.75	-0.443562	0.178853	-2.48004	0.0131367	0.0990615
MGP_BALBcJ_G0018099__Rars	2025.83	-0.218977	0.0883123	-2.47957	0.013154	0.0990615
MGP_BALBcJ_G0020936__Abhd6	146.838	0.479476	0.193418	2.47896	0.0131766	0.0990615
[truncated: 13,074 more rows]
