# Supplementary material for: Estrogen exacerbates mammary involution through neutrophil-dependent and -independent mechanism
Source: eLife journal article supplement (doi:10.7554/elife.57274), 2020-07-24
Supplement: supp [file elife-57274-supp-v1.zip › elife_poa_e57274_Figure_2_source_data_5.xlsx]

## Sheet: ego2_E2B_CTRL_IGG_SIMPLIFY
ID	Description	GeneRatio	BgRatio	pvalue	p.adjust	qvalue	geneID	Count
GO:0050900	leukocyte migration	102/1817	340/23174	1.00749e-33	8.88605e-30	6.24749e-30	Cxcl1/Ch25h/Cd200/S100a8/Itgam/Lyn/Cxcl14/C5ar2/Csf1/Cxcl2/Il1b/Dusp1/Cmklr1/S100a9/Retnlg/Trem1/Fpr2/Il1r1/Madcam1/Ecm1/Il17ra/Serpine1/Cxcl15/Cyp7b1/Ccr1/C5ar1/Cxcl5/Nlrp12/Trem3/Ccl11/Cxcr2/Tnf/Bst1/Lgmn/Itga6/Adam8/Ppbp/Il23a/Ccl2/Ccl3/Ccl9/Dock8/Sele/Csf3r/Emilin1/Tgfb1/Fcer1g/Ccl4/Il1rn/Smpd3/Ccl6/Pf4/Mmp9/Mtus1/Cxcl3/Ada/Plvap/Icam1/Padi2/Myd88/Foxj1/Eps8/Pla2g7/Trpm2/Pde4b/Selp/Anxa1/Itga…	102
GO:0050727	regulation of inflammatory response	83/1817	356/23174	8.90691e-20	1.30932e-16	9.20537e-17	Tgm2/Rb1/Osm/Il1r2/Cd200/S100a8/Nlrp3/Lyn/Esr1/Ptgs2/Socs3/Il1b/Mmp8/S100a9/Fpr2/Il1r1/Zfp36/Zc3h12a/Pik3ap1/Ier3/Acod1/Il17ra/Mgll/Serpine1/Sphk1/Nt5e/C5ar1/Nlrp12/Alox5ap/Pdcd4/Tnf/Fndc4/Bst1/Nfkbia/Adam8/Tmem173/Rora/Ccl3/Tnfaip3/Mefv/Lpl/Fcer1g/Nr1d2/Metrnl/Ccn4/Ada/Cd200r4/Sbno2/Adora2b/Sema7a/Ldlr/Il6/Myd88/Tnip1/Cebpb/Anxa1/Itga2/Cd200r1/Cd44/Pde2a/Nod2/Tnfaip6/Ccr5/C2cd4b/Fcgr1/Adipoq/App…	83
GO:0002685	regulation of leukocyte migration	58/1817	201/23174	8.18289e-19	8.01923e-16	5.63806e-16	Cd200/Lyn/Cxcl14/C5ar2/Csf1/Il1b/Dusp1/Cmklr1/Fpr2/Il1r1/Madcam1/Ecm1/Serpine1/Ccr1/C5ar1/Cxcr2/Bst1/Lgmn/Adam8/Il23a/Ccl2/Dock8/Sele/Emilin1/Tgfb1/Ccl4/Smpd3/Mmp9/Mtus1/Ada/Plvap/Icam1/Padi2/Myd88/Pla2g7/Selp/Anxa1/Itga2/Msn/Adam17/Cd200r1/Ripk3/Dapk2/Nod2/Trp53/Rac1/Thbs1/Ccr6/Calr/Edn1/Slit2/Mif/Trpv4/Lgals3/Ccl12/Tnfrsf18/Ptafr/Dysf	58
GO:0032102	negative regulation of response to external stimulus	75/1817	336/23174	7.15218e-17	5.73475e-14	4.03191e-14	Rb1/Il1r2/Cd200/Nlrp3/C5ar2/Sema4a/Socs3/Dusp1/Anxa2/Fpr2/Zfp36/Dbn1/Zc3h12a/Ier3/Acod1/Serpine1/Pdgfra/Nt5e/Nlrp12/Pdcd4/Fndc4/Pten/Rora/Tnfaip3/Arg2/Neo1/Mefv/Sema6b/Tnr/Nr1d2/Metrnl/Ada/Sema7a/Ldlr/Padi2/Pdgfa/Gja1/Cd200r1/Cd44/Pdgfb/Nod2/Tnfaip6/Sema4c/Hmgcr/Xylt1/Thbs1/Adipoq/Appl2/Tspan8/Pparg/C1qtnf1/Selenos/Trib1/Nucb2/Mill2/Tnfrsf1b/Cdkn1b/Dusp10/Sema3f/Slit2/Mif/Cactin/Dhx58/Siglece/Sem…	75
GO:0070371	ERK1 and ERK2 cascade	73/1817	323/23174	9.11814e-17	6.70183e-14	4.71184e-14	Ptpn1/Lyn/C5ar2/Esr1/Il1b/Dusp1/Gcnt2/Fpr2/Spry4/Akap12/Lif/Dusp6/Epha2/Pdgfra/Ccr1/C5ar1/Nlrp12/Phlpp1/Ngf/Ccl11/Ece1/St5/Fgfr2/Myc/Spry2/Pten/Ccl2/Ccl3/Ccl9/Emilin1/Tgfb1/Ccl4/Prxl2c/Ccl6/Errfi1/Gnai2/Sox9/Ccn1/Icam1/Sema7a/Il6/Tnip1/Map2k1/Pdgfa/Spred1/Cavin3/Lrp1/Dusp4/Adam17/Glipr2/Cd44/Pdgfb/Nod2/Hmgcr/Dstyk/Adipoq/Ccn2/Flt1/Sirt3/Zfp36l1/Tnfrsf11a/Prmt5/Dusp10/Phb2/Mif/Trpv4/Rap1b/Erbb4/Cd…	73
GO:0019221	cytokine-mediated signaling pathway	73/1817	338/23174	1.19179e-15	7.50827e-13	5.27882e-13	Cxcl1/Osm/Il1r2/Csf1/Cxcl2/Il1b/Il1r1/Ecm1/Sphk1/Cxcl15/Ifitm2/Cd300lf/Ccr1/Cxcl5/Ccl11/Ackr1/Ifitm1/Cxcr2/Tnf/Acsl1/Nfkbia/Il6ra/Casp4/Ifitm6/Ereg/Grem2/Ppbp/Ccl2/Ccl3/Ccl9/Fcer1g/Ccl4/Il1rn/Il18rap/Ccl6/Gab1/Pf4/Cxcl3/Oas2/Cntfr/Csnk2b/Plvap/Padi2/Il6/Myd88/Cxcr4/Ifitm3/Adam17/Ikbke/Pdgfb/Krt8/Trp53/Slc27a1/Spi1/Adipoq/Appl2/Pparg/Tnfrsf11a/Ptprf/Trim6/Slit2/Cactin/Foxc1/Crlf2/Hpx/Sh2b2/Ilk/Sam…	73
GO:0032103	positive regulation of response to external stimulus	69/1817	313/23174	2.43998e-15	1.43471e-12	1.0087e-12	Cxcl1/Tgm2/Osm/S100a8/Cxcl14/Csf1/Ptgs2/Il1b/Cmklr1/Mmp8/S100a9/Fpr2/Acod1/Il17ra/Serpine1/Lpar1/Ccr1/C5ar1/Alox5ap/Pdcd4/Cxcr2/Tnf/Lgmn/Nfkbia/Adam8/Il23a/Ccl2/Ccl3/Tgfb1/Lpl/Fcer1g/Ccl4/Ccn4/Adora2b/Ldlr/Il6/Myd88/Tnip1/Cxcr4/Cebpb/Pla2g7/Lrp1/Itga2/Adam17/Pdgfb/Pde2a/Dapk2/Nod2/Rac1/Ccr5/C2cd4b/Fcgr1/Trim15/Thbs1/Ccr6/Tnfrsf11a/Fcgr3/Calr/Tarm1/Edn1/Slit2/Mif/Dhx58/Trpv4/Gprc5b/Artn/Tlr3/Dysf/…	69
GO:0050663	cytokine secretion	59/1817	243/23174	2.72656e-15	1.50302e-12	1.05672e-12	Il4ra/Osm/Il1r2/Cd200/Nlrp3/Lyn/C5ar2/Il1b/Mmp8/Trem1/Clec4e/Akap12/Zc3h12a/Il17ra/Nlrp12/Trem3/Tnf/Casp4/Cidea/Lgr4/Rnf19b/Cd244a/Ccl3/Tnfaip3/Arg2/Ephb6/Lpl/Srgn/Ccn4/Isg15/Il6/Clec5a/Anxa1/Sptbn1/Lrp1/Cd200r1/Tmem106a/Nod2/Fgr/Ccr5/Clec4n/Cd209d/Fermt1/Mcoln2/Tnfrsf1b/Trim6/Mif/Gpam/Crlf2/Trpv4/Mbp/P2rx7/Cd36/Angpt1/Cd84/Dysf/Rorc/Lcp2/Vtcn1	59
GO:0045444	fat cell differentiation	58/1817	238/23174	3.93119e-15	2.03959e-12	1.43397e-12	Ptgs2/Cmklr1/Zfp36/Zc3h12a/Mmp11/Nr4a3/Tcf7l2/Crebl2/Noct/Tnf/Ero1l/Sod2/Itga6/Rora/Tgfb1/Lpl/Metrnl/Ccn4/Steap4/Adgrf5/Nr4a1/Cebpb/Gdf6/Bbs9/Sh3pxd2b/Pex11a/Plac8/Hes1/Nr4a2/Sfrp1/Lrp6/Nudt7/Tbl1x/Jdp2/Rnasel/Adipoq/Egr2/Pparg/Aldh6a1/Nucb2/Zfp36l1/Nipbl/Dusp10/Lgals12/Wnt5b/Per2/Mrap/Taf8/Sh2b2/Trpv4/Arl4a/Adig/Cebpd/Atf5/Trib3/Dysf/Rorc/Wwtr1	58
GO:0048660	regulation of smooth muscle cell proliferation	46/1817	163/23174	8.21232e-15	4.02404e-12	2.82917e-12	Tgm2/Adamts1/Esr1/Ptgs2/Hif1a/Hbegf/Nr4a3/Tcf7l2/Pdcd4/Tnf/Sod2/Il6ra/Fgfr2/Myc/Ereg/Pten/Pik3r1/Tnfaip3/Hmox1/Smpd3/Mmp9/Abcc4/Gnai2/Ccn4/Il6/Myd88/Itga2/Pdgfb/Trp53/Hmgcr/Thbs1/Adipoq/Pparg/Trib1/Pik3ca/Cdkn1b/Ptgir/Ddx39b/Edn1/Nos3/Igfbp5/Ilk/Ldlrap1/Foxj2/Ptafr/Igf1r	46
GO:0048659	smooth muscle cell proliferation	46/1817	168/23174	2.81893e-14	1.30858e-11	9.20016e-12	Tgm2/Adamts1/Esr1/Ptgs2/Hif1a/Hbegf/Nr4a3/Tcf7l2/Pdcd4/Tnf/Sod2/Il6ra/Fgfr2/Myc/Ereg/Pten/Pik3r1/Tnfaip3/Hmox1/Smpd3/Mmp9/Abcc4/Gnai2/Ccn4/Il6/Myd88/Itga2/Pdgfb/Trp53/Hmgcr/Thbs1/Adipoq/Pparg/Trib1/Pik3ca/Cdkn1b/Ptgir/Ddx39b/Edn1/Nos3/Igfbp5/Ilk/Ldlrap1/Foxj2/Ptafr/Igf1r	46
GO:0051271	negative regulation of cellular component movement	67/1817	315/23174	3.8823e-14	1.71209e-11	1.20372e-11	Cd200/Timp1/C5ar2/Sema4a/Dusp1/Dbn1/Serpine1/Afdn/Rap2b/Cfl1/Coro1c/Cyp1b1/Pten/Emilin1/Tgfb1/Sema6b/Il1rn/Nrg1/Actn1/Ada/Stc1/Csnk2b/Sema7a/Srgap3/Il24/Padi2/Limch1/Spred1/Adamts9/Arhgdia/Srf/Lrp1/Cd200r1/Pdgfb/Sfrp1/Scai/Tacstd2/Sema4c/Ccr5/Adam15/Thbs1/Cd63/Adipoq/Pparg/Trib1/Tcaf1/Cdkn1b/Dusp10/Cdh1/Apex1/Ptprg/Calr/Sema3f/Slit2/Podn/Dach1/Mif/Sema4d/Clic4/Igfbp5/Ilk/Erbb4/Sema6c/Ptpn23/Ccl12…	67
GO:0040013	negative regulation of locomotion	69/1817	331/23174	4.58123e-14	1.92412e-11	1.35278e-11	Cd200/Timp1/C5ar2/Sema4a/Dusp1/Dbn1/Serpine1/Afdn/Rap2b/Cfl1/Coro1c/Cyp1b1/Trim8/Pten/Emilin1/Tgfb1/Sema6b/Il1rn/Nrg1/Ada/Stc1/Csnk2b/Sema7a/Srgap3/Il24/Padi2/Limch1/Spred1/Adamts9/Arhgdia/Srf/Lrp1/Cd200r1/Pdgfb/Sfrp1/Scai/Tacstd2/Sema4c/Trim28/Ccr5/Adam15/Trim15/Thbs1/Cd63/Adipoq/Pparg/Trib1/Tcaf1/Dusp10/Cdh1/Apex1/Ptprg/Calr/Sema3f/Slit2/Podn/Dach1/Mif/Sema4d/Clic4/Robo2/Igfbp5/Ilk/Erbb4/Sema6c…	69
GO:0031349	positive regulation of defense response	74/1817	371/23174	6.05046e-14	2.42568e-11	1.70542e-11	Cxcl1/Tgm2/Osm/S100a8/Lyn/Esr1/Ptgs2/Il1b/Mmp8/S100a9/Fpr2/Clec4e/Pik3ap1/Acod1/Il17ra/Serpine1/Cd300lf/Mndal/Alox5ap/Trem3/Pdcd4/Tnf/Nfkbia/Adam8/Tmem173/Ereg/Lgr4/Tlr13/Ccl3/Tnfaip3/Tnip3/Lpl/Fcer1g/Il18rap/Pvr/Ccn4/Adora2b/Ldlr/Il6/Myd88/Tnip1/Cebpb/Gja1/Itga2/Treml4/Ikbke/Tril/Pde2a/Nod2/Ccr5/Tlr11/C2cd4b/Fcgr1/Trim15/Appl2/Reg3g/Mill2/Tnfrsf11a/Fcgr3/Trim6/Tarm1/Mif/Cactin/Dhx58/Hpx/Trpv4/Gp…	74
GO:0050673	epithelial cell proliferation	80/1817	424/23174	1.34273e-13	4.97929e-11	3.50078e-11	Zfp703/Rb1/C5ar2/Pgr/Esr1/Zfp36/Areg/Ecm1/Epha2/Ngfr/Id1/Nr4a3/Cyp7b1/Nfib/C5ar1/Tcf7l2/Ccl11/Tnf/Fgfr2/Myc/Pik3cb/Ereg/Lgr4/Pten/Itpr1/Nme1/Ccl2/Sfn/Tnfaip3/Tgfb1/Hmox1/Has2/Errfi1/Sox9/Vdr/Adora2b/Nr4a1/Il6/Map2k1/Cebpb/Gja1/Adam17/Hes1/Pdgfb/Sfrp1/Nod2/Tacstd2/Lrp6/Etv4/Scn5a/Thbs1/Plcg1/Reg3g/Gdf5/Flt1/Loxl2/Pparg/Prox1/Fermt1/Ift172/Nrarp/Zfp36l1/Wdr77/Ptch1/Cdkn1b/Dusp10/Cdh1/Lims2/Phb2/Uhr…	80
GO:0050708	regulation of protein secretion	88/1817	489/23174	1.35491e-13	4.97929e-11	3.50078e-11	Il4ra/Osm/Il1r2/Cd200/Nlrp3/Lyn/C5ar2/Il1b/Mmp8/Nnat/Hif1a/Clec4e/Akap12/Zc3h12a/Il17ra/Syt9/Nlrp12/Tcf7l2/Tnf/Cd2ap/Ankrd1/Casp4/Cidea/Srcin1/Lgr4/Cd244a/Ccl3/Tnfaip3/Arg2/Midn/Neo1/Tgfb1/Lpl/Srgn/Hcar2/Ccn4/Kcnn4/Gja5/Il6/Clec5a/Gja1/Trpm2/Anxa1/Sptbn1/Lrp1/Myo18a/Cd200r1/Pde3b/Sfrp1/Nod2/Fgr/Rac1/Ccr5/Hmgcr/Clec4n/Mpc2/P3h1/Cd209d/Kcnq1/Erp29/Fermt1/Dynll1/Sirt3/Pim3/Exph5/Tnfrsf1b/Adra2a/Per2…	88
GO:0045785	positive regulation of cell adhesion	78/1817	410/23174	1.73722e-13	6.1289e-11	4.30903e-11	Il4ra/Tgm2/Nlrp3/Ret/Csf1/Il1b/Gcnt2/Dbn1/Itga5/Olfm4/S100a10/Afdn/Nr4a3/Pcsk5/Cd80/Cfl1/Myadm/Tnf/Ninj1/Fstl3/Pdpn/Il6ra/Emilin2/Itga6/Adam8/Enpp2/Il23a/Cd244a/Ccl2/Dock8/Ephb6/Emilin1/Tgfb1/Has2/Ada/Cd209e/Ccn1/Icam1/Il6/Selp/Sdc4/Anxa1/Hacd1/Itga2/Cass4/Cd44/Utrn/Hes1/Nfkbid/Rac1/Ccr5/Ecm2/Thbs1/Cd63/Fermt1/Arpc2/Dusp10/Lgals1/Fbln2/Cdh1/Calr/Lims2/Gpam/Prkcq/Myb/Ilk/Ephb4/Ptpn23/Cd36/Angpt1/C…	78
GO:0042326	negative regulation of phosphorylation	83/1817	451/23174	1.92835e-13	6.54155e-11	4.59915e-11	Rb1/Ptpn1/Ptpn5/Lyn/Socs3/Il1b/Dusp1/Spry4/Zc3h12a/Ier3/Actb/Lif/Dusp6/Gprc5a/Fbxo7/Nlrp12/Phlpp1/Hspa4/Impact/Myadm/Gadd45b/Deptor/Coro1c/Srcin1/Spry2/Pten/Tnfaip3/Dusp5/Midn/Emilin1/Tgfb1/Atxn1/Errfi1/Rasip1/Ncor1/Ppp1r15a/Ogt/Wars/Pid1/Il6/Tnip1/Spred1/Ddit4/Slfn1/Dok2/Birc3/Dusp4/Pik3ip1/Sfrp1/Pde2a/Ppif/Lrp6/Hmgcr/Adipoq/Pmepa1/Pde12/Dynll1/Sirt3/Trib1/Prkar2b/Cdkn1b/Dusp10/Gadd45g/Mapk8ip1/…	83
GO:0050920	regulation of chemotaxis	51/1817	212/23174	3.05961e-13	9.63778e-11	6.77601e-11	Lyn/Cxcl14/C5ar2/Sema4a/Csf1/Il1b/Dusp1/Cmklr1/Fpr2/Serpine1/Lpar1/Pdgfra/Ccr1/C5ar1/Cxcr2/Bst1/Lgmn/Il23a/Ccl2/Tgfb1/Sema6b/Ccl4/Mtus1/Sema7a/Padi2/Cxcr4/Pla2g7/Itga2/Adam17/Pdgfb/Dapk2/Nod2/Sema4c/Rac1/Adgra2/Thbs1/Ccr6/Zswim8/Calr/Sema3f/Edn1/Slit2/Mif/Sema4d/Trpv4/Robo2/Sema6c/Artn/Ccl12/Dysf/Zswim4	51
GO:0072593	reactive oxygen species metabolic process	61/1817	288/23174	6.53377e-13	1.98717e-10	1.39711e-10	Gpx3/Cxcl1/Itgam/Esr1/Ptgs2/Il1b/Mmp8/Hif1a/Fpr2/Zc3h12a/Ier3/Acod1/Hp/Ngfr/Ptx3/Tnf/Sod2/Cyp1b1/Mmp3/Rora/Arg2/Tgfb1/Smpd3/Gnai2/Ddah1/Ogt/Ccn1/Pid1/Icam1/Il6/Ddit4/Eif6/Eif5a/Sh3pxd2b/Birc3/Tmem106a/Gla/Klf2/Pdgfb/Ripk3/Trp53/Rac1/Ncf4/Cd177/Thbs1/Ncf2/Ccn2/Selenos/Dynll1/Sirt3/G6pdx/Edn1/Nos3/Arf4/Duoxa1/Trim30a/Nrros/P2rx7/Cd36/Vav1/Itgb2	61
GO:0001819	positive regulation of cytokine production	81/1817	445/23174	6.90827e-13	2.03103e-10	1.42795e-10	Il4ra/Osm/Cd200/Nlrp3/Ptgs2/Il1b/Mmp8/Hif1a/Il1r1/Clec4e/Akap12/Il17ra/Serpine1/Nr4a3/Slc11a1/Mndal/C5ar1/Tnf/Il6ra/Cyp1b1/Casp4/Adam8/Tmem173/Ereg/Rora/Il23a/Pik3r1/Cd244a/Ccl2/Ccl3/Tgfb1/Lpl/Fcer1g/Bcl3/Ccl4/Il1rn/Pf4/Atf4/Adora2b/Sema7a/Il6/Myd88/Cebpb/Clec5a/Pde4b/Anxa1/Sptbn1/Lrp1/Adam17/Hilpda/Nod2/Fgr/Ccr5/Clec4n/Trim15/Thbs1/Adipoq/Cd209d/Zbtb20/Fermt1/Mcoln2/Ddx21/Adra2a/Fcgr3/Trim6/Tarm…	81
GO:0019216	regulation of lipid metabolic process	67/1817	336/23174	9.49843e-13	2.65449e-10	1.86628e-10	Rb1/Lyn/Esr1/Ptgs2/Il1b/Snai1/Fpr2/Sphk1/Nr4a3/Pdgfra/Tcf7l2/Crebl2/Tnf/Cidea/Rora/Pik3r1/Tgfb1/Smpd3/Nr1d2/Thrb/Hcar2/Ephx2/Ccn1/Vdr/Adgrf5/Adora2b/Ldlr/Ttc39b/Pdgfa/Prkaa2/Eif6/Anxa1/Pik3ip1/Samd8/Pdgfb/Pde3b/Nod2/Fgr/Pik3r5/Rac1/Slc27a1/Adipoq/Dbi/Appl2/Acsl5/Zbtb20/Flt1/Pparg/Prox1/Nucb2/Pik3r4/Adra2a/Lgals12/Nr3c1/Rubcn/Gpam/Atg14/Fabp5/Cd36/Gpr39/Kit/Trib3/Stub1/Sec14l2/Rdh10/Rorc/Igf1r	67
GO:0002274	myeloid leukocyte activation	50/1817	211/23174	9.63079e-13	2.65449e-10	1.86628e-10	Il4ra/Cd200/Itgam/Ndrg1/Lyn/Mmp8/Fpr2/Sphk1/Nr4a3/Cd300lf/Slc11a1/C5ar1/Cxcl5/Cxcr2/Tnf/Rora/Clec4d/Cd244a/Tgfb1/Fcer1g/Hmox1/Il18rap/Relb/Sbno2/Adgrf5/Adora2b/Ldlr/Ywhaz/Stx11/Cd300lb/Myo18a/Tmem106a/Fgr/Cd177/Spi1/Thbs1/Pi4k2a/Pparg/Fcgr3/Crlf2/Pja2/Lat2/Cd84/Kit/Tlr3/Itgb2/Ltbr/Ptafr/Dysf/Lcp2	50
GO:2000377	regulation of reactive oxygen species metabolic process	48/1817	200/23174	1.66338e-12	4.44577e-10	3.12568e-10	Cxcl1/Itgam/Esr1/Ptgs2/Il1b/Mmp8/Hif1a/Fpr2/Zc3h12a/Ier3/Acod1/Hp/Ngfr/Ptx3/Tnf/Sod2/Cyp1b1/Mmp3/Arg2/Tgfb1/Smpd3/Gnai2/Ddah1/Ogt/Pid1/Icam1/Il6/Eif6/Eif5a/Birc3/Tmem106a/Gla/Klf2/Pdgfb/Ripk3/Trp53/Rac1/Cd177/Thbs1/Selenos/Dynll1/Sirt3/G6pdx/Arf4/Duoxa1/Trim30a/Cd36/Itgb2	48
GO:0002683	negative regulation of immune system process	83/1817	470/23174	1.90981e-12	4.95426e-10	3.48318e-10	Il4ra/Cd200/Lyn/C5ar2/Sftpd/Dusp1/Zfp36/Zc3h12a/Pik3ap1/Acod1/Olfm4/Cd300lf/Fbxo7/Ccr1/Cd80/Cxcr2/Tnf/Tap2/Fstl3/Nfkbia/Myc/Lgr4/Nme1/Pik3r1/Tnfaip3/Arg2/Pla2g2d/Emilin1/Tgfb1/Fcer1g/Hmox1/Pf4/Ada/Hoxa9/Sox9/Adgrf5/Ldlr/Padi2/Foxj1/Cebpb/Skint2/Slfn1/Sdc4/Anxa1/Cd200r1/Cd44/Hes1/Nfkbid/Sfrp1/Nod2/Thbs1/Adipoq/Pparg/Inpp4b/Selenos/Nrarp/Trib1/Zfp36l1/Mill2/Dusp10/Tarm1/Slit2/Cd68/Mif/Cactin/Dhx58/…	83
GO:0001503	ossification	72/1817	381/23174	2.08387e-12	5.25134e-10	3.69205e-10	Csf1/Ptgs2/Hif1a/Pdlim7/Areg/Ecm1/Epha2/Id1/Ccr1/Tcf7l2/Ifitm1/Noct/Tnf/Fstl3/Fgfr2/Junb/Lgr4/Nfe2/Tgfb1/Smpd3/Thrb/Mmp9/Srgn/Ccn4/Stc1/Isg15/Sox9/Sbno2/Ccn1/Il6/Bmp3/Cebpb/Clec5a/Gja1/Sh3pxd2b/Sfrp1/Fgr/Lrp6/Acvr1/Fbn2/Dhrs3/Ddx5/Xylt1/P3h1/Egr2/Ccn2/Ltbp3/Chrdl2/Tnfrsf11a/Nipbl/Ptch1/Fzd1/Hspg2/Tmem38b/Id3/Bcor/Foxc1/Sema4d/Ifitm5/Cited1/Igfbp5/Ilk/P2rx7/Lrp4/Cebpd/Cbfb/Lmna/Wwtr1/Chrdl1/Creb3l…	72
GO:0007162	negative regulation of cell adhesion	59/1817	283/23174	3.13677e-12	7.68508e-10	5.40313e-10	Zfp703/Il4ra/Sftpd/Dusp1/Gcnt2/Zc3h12a/Serpine1/Cd80/Cfl1/Myadm/Coro1c/Cyp1b1/Srcin1/Adam8/Enpp2/Pten/Pik3r1/Tnfaip3/Arg2/Rnd1/Pla2g2d/Tgfb1/Il1rn/Tnr/Foxj1/Map2k1/Cebpb/Skint2/Slfn1/Sdc4/Anxa1/Lrp1/Cd44/Nfkbid/Fam107a/Pde3b/Tacstd2/Adam15/Thbs1/Dact2/Adipoq/C1qtnf1/Nrarp/Lgals1/Cdh1/Tarm1/Sema4d/Trpv4/Lgals3/Mbp/Serpine2/Bcar1/Cblb/Angpt1/Cbfb/Ubash3b/Fgl2/Dlc1/Vtcn1	59
GO:0062012	regulation of small molecule metabolic process	68/1817	353/23174	3.43485e-12	8.18794e-10	5.75667e-10	Ptgs2/Il1b/Snai1/Hif1a/Ier3/Slc7a11/Nr4a3/Tcf7l2/Tnf/Myc/Rora/Cd244a/Midn/Tgfb1/Prxl2c/Smpd3/Has2/Thrb/Ephx2/Ncor1/Ogt/Kat2a/Vdr/Adora2b/Pid1/Ldlr/Adcyap1r1/Ttc39b/Il6/Map2k1/Prkaa2/Plek/Ddit4/Eif6/Anxa1/Pdgfb/Pde2a/Ppif/Trp53/Adipoq/Dbi/Appl2/Acsl5/Zbtb20/Pparg/Prox1/Pde12/C1qtnf1/Pgam1/Nucb2/Entpd1/Nr3c1/Nos3/Dyrk2/Mif/Epm2aip1/Pfkfb2/Fabp5/Igfbp5/P2rx7/Foxk1/Kit/Trib3/Slc7a7/Sec14l2/Rdh10/Ptaf…	68
GO:0001763	morphogenesis of a branching structure	53/1817	240/23174	3.88869e-12	8.57457e-10	6.0285e-10	Tgm2/Pgr/Esr1/Csf1/Socs3/Il1b/Areg/Epha2/Ncoa3/Pdgfra/Timeless/Ccl11/Tnf/Fgfr2/Myc/Spry2/Lgr4/Pkd1/Tgfb1/Cpe/Rasip1/Sox9/Vdr/Il6/Pdgfa/Cxcr4/Srf/Cd44/Rere/Pdgfb/Sfrp1/Tacstd2/Bcl11a/Lrp6/Etv4/Acvr1/Col4a1/Flt1/Prox1/Nrarp/Ptch1/Cdh1/Edn1/Slit2/Adm/Phb2/Clic4/Ilk/Sox10/Angpt1/Etv5/Slc12a2/Rdh10	53
GO:1901342	regulation of vasculature development	66/1817	340/23174	4.99464e-12	1.02448e-09	7.2028e-10	Adamts1/Sema4a/Ptgs2/Thbs2/Il1b/Hif1a/Zc3h12a/Itga5/Ecm1/Lif/Serpine1/Sphk1/Epha2/Ngfr/Id1/C5ar1/Ccl11/Pdcd4/Cxcr2/Sod2/Btg1/Il6ra/Cyp1b1/Spry2/Enpp2/Ccl2/Emilin1/Hmox1/Gab1/Pf4/Mmp9/Plk2/Ddah1/Wars/Ecscr/Egln1/Spred1/Cxcr4/Adamts9/Anxa1/Prok2/Klf2/Pdgfb/Pde3b/Pik3c2a/Col4a2/Adgra2/Thbs1/Plcg1/Flt1/Pparg/Epn2/Adm/Nos3/Adam12/Foxc1/Lgals3/Ephb4/Cd36/Kit/Foxj2/Tlr3/Itgb2/Akt3/Itgb8/Creb3l1	66
GO:0050678	regulation of epithelial cell proliferation	68/1817	357/23174	5.87957e-12	1.17859e-09	8.28626e-10	Zfp703/Rb1/C5ar2/Pgr/Esr1/Zfp36/Ecm1/Ngfr/Id1/Nr4a3/Cyp7b1/Nfib/C5ar1/Tcf7l2/Ccl11/Tnf/Fgfr2/Myc/Pten/Itpr1/Nme1/Ccl2/Sfn/Tnfaip3/Tgfb1/Hmox1/Has2/Errfi1/Sox9/Vdr/Adora2b/Nr4a1/Il6/Gja1/Adam17/Hes1/Pdgfb/Sfrp1/Nod2/Tacstd2/Lrp6/Etv4/Scn5a/Thbs1/Plcg1/Reg3g/Gdf5/Flt1/Pparg/Prox1/Ift172/Nrarp/Zfp36l1/Wdr77/Ptch1/Cdkn1b/Dusp10/Cdh1/Lims2/Phb2/Uhrf1/Erbb4/Tgm1/Ccl12/Kif3a/Akt3/Tgfa/Dysf	68
GO:0002526	acute inflammatory response	35/1817	122/23174	7.76702e-12	1.52234e-09	1.0703e-09	Cxcl1/Nlrp3/Ptgs2/Il1b/Trem1/Hp/Saa3/Alox5ap/Cxcr2/Tnf/Serpina3n/Adam8/Cd163/Ephb6/Fcer1g/Il1rn/Icam1/Il6/F8/Acvr1/Ccr5/C2cd4b/Fcgr1/Reg3g/Cd55/Pparg/Selenos/Tnfrsf11a/Adra2a/Fcgr3/Mif/Alox5/Itih4/Fcgr2b/Orm2	35
GO:0010769	regulation of cell morphogenesis involved in differentiation	65/1817	338/23174	1.11285e-11	1.96307e-09	1.38017e-09	Ret/Sema4a/Dbn1/Cdkl5/Sgk1/Mgll/Olfm4/S100a10/Afdn/Id1/Ngf/Bdnf/Cfl1/Myadm/Pdpn/Coro1c/Srcin1/Nedd4/Spg20/Enpp2/Dnm3/Pten/Picalm/Sema6b/Tnr/Has2/Nrg1/Tnik/Ntrk2/Sema7a/Map2k1/Srf/Lrp1/Cass4/Vim/Tacstd2/Bcl11a/Sema4c/Rac1/Ccr5/Map1b/Ifrd1/Mfn1/Arpc2/Ppp1r9a/Zswim8/Ptprf/Calr/Sema3f/Slit2/Lims2/Kif13b/Opa1/Trak1/Arhgap35/Sema4d/Limk1/Robo2/Ilk/Bcar1/Sema6c/Lrp4/Ulk2/Olfm1/Zswim4	65
GO:0009611	response to wounding	84/1817	495/23174	1.22313e-11	2.1153e-09	1.4872e-09	Lyn/Timp1/F10/S100a9/Anxa2/Hif1a/Zfp36/Hbegf/Sdc1/Slc7a11/Serpine1/Ngfr/Pdgfra/Slc11a1/Rap2b/Sod2/Ninj1/Pdpn/Serpinb2/Pik3cb/Pten/Ccl2/Tnfaip3/Neo1/Tgfb1/Fcer1g/Map2k4/Tnr/Hmox1/Mir22hg/Pf4/Ccn4/Rtn4rl2/Ccn1/F5/Il6/F13a1/Map2k1/Pdgfa/Cxcr4/Plek/Gja1/Selp/Sdc4/Anxa1/Srf/Lrp1/Adam17/Cd44/F8/Dst/Pdgfb/Dcbld2/Hmgcr/Xylt1/Thbs1/Evpl/Reg3g/Tspan8/Ifrd1/C1qtnf1/Ppl/Entpd1/Zfp36l1/Plec/Dsp/Cdkn1b/Dusp10/…	84
GO:0031346	positive regulation of cell projection organization	80/1817	464/23174	1.67824e-11	2.79285e-09	1.96356e-09	Adamts1/Ptpn5/Ret/Lyn/S100a9/Dbn1/Cdkl5/Sgk1/Lif/Afdn/Sphk1/Ngfr/Pfn1/Lpar1/Cxcl5/Ngf/Bdnf/Cfl1/Ehd1/Enc1/Coro1c/Ankrd1/Itga6/Enpp2/Dnm3/Cdc42ep2/Itpr1/Nme1/Picalm/Nrg1/Kat2a/Ntrk2/Sema7a/Il6/Eps8/Map2k1/Cxcr4/Srf/Lrp1/Itga2/Adam17/Bcl11a/Prom2/Lrp6/Rac1/Rab8b/P3h1/Kidins220/Map1b/Scarb2/Gm14137/Dynll1/Mfn1/Arpc2/Ttbk2/Ppp1r9a/Fzd1/Ptprf/Nr3c1/Opa1/Mif/Trak1/Plek2/Ddx56/Arhgap35/Vldlr/Sema4d/Nlgn…	80
GO:0051348	negative regulation of transferase activity	52/1817	242/23174	1.84563e-11	2.99674e-09	2.10691e-09	Rb1/Ptpn1/Ptpn5/Lyn/Il1b/Dusp1/Zfp36/Spry4/Actb/Dusp6/Gprc5a/Fbxo7/Gadd45b/Deptor/Coro1c/Srcin1/Spry2/Pten/Tnfaip3/Dusp5/Midn/Errfi1/Rasip1/Wars/Il6/Spred1/Dusp4/Pik3ip1/Sfrp1/Trp53/Lrp6/Hmgcr/Adipoq/Pparg/Trib1/Prkar2b/Cdkn1b/Dusp10/Gadd45g/Mapk8ip1/Rubcn/Limk1/Ilk/Pkia/Fam72a/Cblb/Trib3/Ubash3b/Rtraf/Shb/Wwtr1/Igf1r	52
GO:0007159	leukocyte cell-cell adhesion	62/1817	319/23174	2.08741e-11	3.12051e-09	2.19393e-09	Il4ra/S100a8/Itgam/Nlrp3/Sftpd/Il1b/S100a9/Madcam1/Zc3h12a/Itga5/Nr4a3/Nt5e/Cd80/Tnf/Il6ra/Adam8/Il23a/Cd244a/Ccl2/Arg2/Dock8/Sele/Ephb6/Pla2g2d/Tgfb1/Olr1/Has2/Ada/Cd209e/Icam1/Il6/Tnip1/Foxj1/Cebpb/Skint2/Slfn1/Selp/Sdc4/Anxa1/Msn/Cd44/Hes1/Nfkbid/Cd177/Nrarp/Dusp10/Lgals1/Tarm1/Gpam/Sema4d/Prkcq/Lgals3/Myb/Gcnt1/Ephb4/Cblb/Cbfb/Itgb2/Fgl2/Ptafr/Shb/Vtcn1	62
GO:0048511	rhythmic process	58/1817	289/23174	2.4293e-11	3.34788e-09	2.35379e-09	Adamts1/Pgr/Esr1/Ngfr/Id1/Ptx3/Inhba/Pdgfra/Cyp7b1/Phlpp1/Ngf/Timeless/Bdnf/Noct/Arntl2/Ereg/Lgr4/Enpp2/Per3/Pten/Rora/Nr1d2/Nfkb2/Ncor1/Mybbp1a/Ada/Ogt/Relb/Atf4/Ntrk2/Gpr176/Il6/Dbp/Prkaa2/Cavin3/Anxa1/Tef/Prok2/Trp53/Cipc/Ddx5/Egr2/Pparg/Prox1/Mat2a/Tnfrsf11a/Nfil3/Prmt5/Cry2/Per2/Nos3/Id3/Kmt2a/Atf5/Arrb2/Piwil2/Rorc/Igf1r	58
GO:1990868	response to chemokine	25/1817	70/23174	3.92439e-11	5.16613e-09	3.63214e-09	Cxcl1/Cxcl2/Dusp1/Zc3h12a/Cxcl15/Ccr1/Cxcl5/Ccl11/Ackr1/Ppbp/Ccl2/Ccl3/Ccl9/Dock8/Ccl4/Ccl6/Pf4/Cxcl3/Padi2/Cxcr4/Slit2/Foxc1/Gpr35/Ccl12/Slc12a2	25
GO:1990869	cellular response to chemokine	25/1817	70/23174	3.92439e-11	5.16613e-09	3.63214e-09	Cxcl1/Cxcl2/Dusp1/Zc3h12a/Cxcl15/Ccr1/Cxcl5/Ccl11/Ackr1/Ppbp/Ccl2/Ccl3/Ccl9/Dock8/Ccl4/Ccl6/Pf4/Cxcl3/Padi2/Cxcr4/Slit2/Foxc1/Gpr35/Ccl12/Slc12a2	25
GO:0043062	extracellular structure organization	61/1817	317/23174	4.65199e-11	6.0339e-09	4.24224e-09	Rb1/Itga8/Mmp8/Anxa2/Sdc1/Plod2/Soat2/Mmp11/Mmp19/Ptx3/Loxl4/Pdgfra/Tnf/Ero1l/Pdpn/Qsox1/Cyp1b1/Mmp3/Emilin1/Tgfb1/Lpl/Bcl3/Tnr/Smpd3/Has2/Mmp9/Col5a3/Nfkb2/Sox9/Ccn1/Tgfbi/Il6/Pla2g7/Adamts9/Sdc4/Sh3pxd2b/Col4a1/Col4a2/Col18a1/Plod1/Ecm2/P3h1/Tnfrsf11b/Ccn2/Loxl2/Ces1d/Fermt1/Tnfrsf1b/Hspg2/Fbln2/Tmem38b/Soat1/Col5a1/Col9a1/Foxc1/Lgals3/Adamts14/Lipg/Cd36/Col12a1/Creb3l1	61
GO:0010876	lipid localization	67/1817	366/23174	5.24445e-11	6.70377e-09	4.7132e-09	Abca8a/Il1b/Anxa2/Abca8b/Zc3h12a/Tex2/Slco2a1/Soat2/Spns3/Inhba/Cyp4f18/Msr1/Tnf/Ehd1/Acsl1/Nfkbia/Cidea/Pla2g2d/Lpl/Osbpl6/Pnpla8/Abcc4/Ncor1/Kcnn4/Ldlr/Ttc39b/Anxa1/Lrp1/Atp8b1/Ikbke/Hilpda/Relch/Lrp6/Slc27a1/Pitpna/Slco2b1/Thbs1/Adipoq/Acsl5/Scarb2/Pparg/C1qtnf1/Stoml1/Nucb2/Slc10a6/Tnfrsf11a/Ptch1/Spns2/Cry2/Abca6/Sigmar1/Soat1/Edn1/Atp10b/Atp8b4/Mif/Vldlr/Mfsd2a/Plekha3/Lipg/P2rx7/Ldlrap1/Cd…	67
GO:1903034	regulation of response to wounding	42/1817	178/23174	7.19993e-11	8.58154e-09	6.0334e-09	Lyn/S100a9/Anxa2/Hbegf/Serpine1/Pdgfra/Pdpn/Pten/Ccl2/Neo1/Fcer1g/Tnr/Ccn4/Map2k1/Pdgfa/Cxcr4/Plek/Gja1/Selp/Anxa1/Lrp1/Adam17/Pdgfb/Hmgcr/Xylt1/Thbs1/Reg3g/Tspan8/C1qtnf1/Cdkn1b/Dusp10/Adra2a/Ptprf/Mif/Prkcq/Tpsab1/Serpine2/Thbd/Cd36/Ubash3b/Arfgef1/Igf1r	42
GO:0051222	positive regulation of protein transport	74/1817	433/23174	1.47097e-10	1.64228e-08	1.15463e-08	Il4ra/Osm/Ptpn5/Nlrp3/Ptgs2/Il1b/Mmp8/Nnat/Hif1a/Clec4e/Akap12/Zc3h12a/Plk3/Il17ra/Tcf7l2/Tnf/Cd2ap/Ankrd1/Casp4/Pik3r1/Cd244a/Ccl2/Ccl3/Sfn/Tgfb1/Lpl/Hcar2/Kcnn4/Chp2/Il6/Clec5a/Gja1/Trpm2/Sptbn1/Lrp1/Myo18a/Nod2/Fgr/Trim28/Rac1/Ccr5/Clec4n/Mpc2/Cd209d/Fermt1/Dynll1/Sirt3/Arpc2/Tcaf1/Exph5/Ran/Trim6/Cdh1/Cnst/Nutf2/Mif/Crlf2/Nlgn2/Chrm1/Trpv4/Prkcq/Pfkfb2/Bag3/Mbp/P2rx7/Frmd4a/Ptpn23/Cd36/Gpr39/…	74
GO:1901652	response to peptide	68/1817	383/23174	1.51412e-10	1.66931e-08	1.17364e-08	Socs2/Ptpn1/Sesn3/Socs3/Il1b/Fpr2/Sgk1/Ngfr/Nr4a3/C1qtnf9/Timeless/Cfl1/Lgmn/Nfkbia/Casp4/Serpina3n/Pten/Pik3r1/Tnfaip3/Lpl/Smpd3/Mmp9/Gnai2/Ogt/Pid1/Icam1/Nr4a1/Gdf15/Cish/Eif6/Anxa1/Lrp1/Nr4a2/Vim/Pde3b/Nod2/Trp53/Slc27a1/Rab8b/Cacnb1/Adipoq/Egr2/Appl2/Reg3g/Pparg/Nucb2/Zfp36l1/Rangap1/Adcy6/Dennd4c/Cry2/Ptprf/Phip/Opa1/Gpam/Sh2b2/Epm2aip1/Trpv4/Prkcq/Cited1/Bcar1/Cd36/Ybx1/Trib3/Akt3/Fcgr2b/Yw…	68
GO:0048871	multicellular organismal homeostasis	80/1817	485/23174	1.57269e-10	1.71249e-08	1.20399e-08	Il4ra/Rb1/Plcl1/Muc13/Csf1/Ptgs2/Sftpd/Il1b/Gcnt2/Cmklr1/Homer2/Tmprss13/Adamts5/Id1/Nr4a3/C1qtnf9/Slc11a1/Tnf/Cldn4/Acsl1/Dio2/Cidea/Adam8/Lgr4/Sfn/Il1rn/Nr1d2/Metrnl/Ogt/Atf4/Sox9/Adgrf5/Pgam5/Il6/Cldn1/Prkaa2/Cxcr4/Cebpb/Gja1/Trpm2/Srf/Plac8/Adam17/Nod2/Lrp6/Aqp7/Rac1/Ccr5/Slc27a1/Slc11a2/Adipoq/Appl2/Tnfrsf11b/Ccn2/Ltbp3/Pik3ca/Adcy6/Tnfrsf11a/Nphp4/Ampd2/Per2/Cdh1/Gadd45g/Col9a1/Nos3/Chmp4b/…	80
GO:0031589	cell-substrate adhesion	62/1817	337/23174	2.21837e-10	2.24897e-08	1.58118e-08	Itga8/Csf1/Gcnt2/Dbn1/Itga5/Olfm4/S100a10/Serpine1/Pcsk5/Cfl1/Myadm/Bst1/Ninj1/Pdpn/Coro1c/Emilin2/Srcin1/Itga6/Adam8/Pik3cb/Enpp2/Pten/Pik3r1/Emilin1/Has2/Col5a3/Actn1/Ccn1/Limch1/Adamts9/Parvb/Sdc4/Srf/Hacd1/Lrp1/Itga2/Cass4/Utrn/Sned1/Fam107a/Sfrp1/Tacstd2/Rac1/Adam15/Ecm2/Thbs1/Cd63/Ccn2/Fermt1/Arpc2/Hspg2/Lgals1/Fbln2/Calr/Lims2/Ilk/Bcar1/Cd36/Angpt1/Itgb2/Dlc1/Itgb8	62
GO:1901653	cellular response to peptide	55/1817	286/23174	4.24255e-10	4.11201e-08	2.89102e-08	Socs2/Ptpn1/Sesn3/Socs3/Il1b/Fpr2/Sgk1/Ngfr/Nr4a3/C1qtnf9/Timeless/Cfl1/Lgmn/Casp4/Pten/Pik3r1/Lpl/Smpd3/Gnai2/Ogt/Pid1/Icam1/Nr4a1/Gdf15/Cish/Lrp1/Nr4a2/Vim/Pde3b/Nod2/Trp53/Rab8b/Cacnb1/Adipoq/Appl2/Pparg/Nucb2/Zfp36l1/Rangap1/Adcy6/Dennd4c/Ptprf/Phip/Opa1/Gpam/Sh2b2/Prkcq/Bcar1/Cd36/Ybx1/Trib3/Akt3/Fcgr2b/Ywhag/Igf1r	55
GO:0033028	myeloid cell apoptotic process	17/1817	37/23174	5.18385e-10	4.864e-08	3.41972e-08	Slc7a11/Cxcr2/Pik3cb/Pten/Fcer1g/Hcar2/Il6/Clec5a/Anxa1/Adam17/Cd44/Nod2/Ccr5/Adipoq/Selenos/Mif/Fcgr2b	17
GO:2000106	regulation of leukocyte apoptotic process	30/1817	108/23174	5.67078e-10	5.26488e-08	3.70156e-08	Lyn/Hif1a/Slc7a11/Nr4a3/Cxcr2/Myc/Adam8/Pik3cb/Pten/Arg2/Dock8/Fcer1g/Hcar2/Ada/Anxa1/Adam17/Cd44/Nfkbid/Ripk3/Nod2/Trp53/Ccr5/Selenos/Mif/Gpam/Prkcq/Lgals3/P2rx7/Fcgr2b/Rorc	30
GO:0090407	organophosphate biosynthetic process	80/1817	498/23174	5.73651e-10	5.27042e-08	3.70546e-08	Isyna1/Plcl1/Hif1a/Fpr2/Ier3/Adssl1/Sgms2/Ctps/Acsl1/Myc/Pik3cb/Plce1/Nme1/Cd244a/Tgfb1/Agpat5/Gpat4/Prxl2c/Aprt/Pigg/Ppat/Ncor1/Ada/Ogt/Adgrf5/Adora2b/Pid1/Adcyap1r1/Mboat7/Map2k1/Pdgfa/Prkaa2/Plek/Ddit4/Eif6/Samd8/Pdgfb/Pik3c2a/Trp53/Ak2/Agpat4/Far1/Slc27a1/Mpc2/Pgs1/Ak1/Pi4k2a/Plcg1/Pank3/Gucy1a1/Aldoc/Acsl5/Cmpk2/Zbtb20/Pgam1/Entpd1/Pik3ca/Adcy6/Hk3/Plaat3/Pik3c2b/Ampd2/G6pdx/Dgka/Tmem38b/Pig…	80
GO:0051090	regulation of DNA-binding transcription factor activity	68/1817	395/23174	5.94312e-10	5.39019e-08	3.78967e-08	Traf1/Cd200/Nlrp3/Esr1/Il1b/Cmklr1/Zc3h12a/Acod1/Csf3/Sphk1/Ncoa3/Id1/Nlrp12/Tcf7l2/Ngf/Bdnf/Tnf/Nfkbia/Cyp1b1/Adam8/Trim8/Tmem173/Pten/Tnfaip3/Pkd1/Ripk4/Tgfb1/Hmox1/Il18rap/Adgrg3/Icam1/Egln1/Il6/Myd88/Foxj1/Adgrf1/Pim1/Srf/Fosl1/Nfkbid/Ripk3/Nod2/Lrp6/Trim15/Pparg/Prox1/Ifrd1/Trib1/Tnfrsf11a/Nfkbib/Ptch1/Fzd1/Edn1/Phb2/Id3/Glis2/Cactin/Prkcq/Cys1/Nfam1/Cd36/Cd84/Arrb2/Kit/Tlr3/Itgb2/Fcgr2b/Igf…	68
GO:0050764	regulation of phagocytosis	29/1817	102/23174	5.9891e-10	5.39019e-08	3.78967e-08	Sftpd/Il1b/Fpr2/Sphk1/Ptx3/Cd300lf/Slc11a1/Tnf/Pten/Ccl2/Tgfb1/Fcer1g/Lrp1/Itga2/Myo18a/Nod2/Fgr/Fcgr1/Lyar/Adipoq/Appl2/Pparg/Fcgr3/Calr/Siglece/Atg3/Cd36/Fcgr2b/Dysf	29
GO:0001818	negative regulation of cytokine production	51/1817	258/23174	6.69674e-10	5.96619e-08	4.19463e-08	Il1r2/Cd200/Nlrp3/C5ar2/Sftpd/Cmklr1/Mmp8/Zfp36/Zc3h12a/Homer2/Acod1/Epha2/Slc11a1/Nlrp12/Pdcd4/Tnf/Cd2ap/Cidea/Lgr4/Il23a/Tnfaip3/Arg2/Mefv/Tgfb1/Bcl3/Tia1/Hmox1/Errfi1/Srgn/Prg4/Relb/Il6/Foxj1/Anxa1/Cd200r1/Klf2/Nod2/Rac1/Thbs1/Adipoq/Appl2/Pparg/Selenos/Nutf2/Cactin/Dhx58/Trim30a/Angpt1/Cd84/Arrb2/Fcgr2b	51
GO:0032963	collagen metabolic process	30/1817	109/23174	7.24242e-10	6.30265e-08	4.43118e-08	Mmp8/Hif1a/Plod2/Mmp11/Serpine1/Ctsb/Id1/Mmp19/Il6ra/Mmp3/Ccl2/Emilin1/Tgfb1/Smpd3/Errfi1/Mmp9/Adora2b/Il6/Itga2/Vim/Pdgfb/Adam15/Plod1/P3h1/Ccn2/Pparg/Col5a1/P2rx7/Arrb2/Creb3l1	30
GO:0045598	regulation of fat cell differentiation	34/1817	135/23174	7.28877e-10	6.30265e-08	4.43118e-08	Ptgs2/Cmklr1/Zfp36/Zc3h12a/Mmp11/Tcf7l2/Crebl2/Noct/Tnf/Sod2/Rora/Tgfb1/Lpl/Metrnl/Ccn4/Cebpb/Sh3pxd2b/Hes1/Sfrp1/Lrp6/Jdp2/Adipoq/Pparg/Nucb2/Zfp36l1/Dusp10/Lgals12/Wnt5b/Taf8/Trpv4/Adig/Trib3/Rorc/Wwtr1	34
GO:0097193	intrinsic apoptotic signaling pathway	55/1817	292/23174	9.41352e-10	8.06089e-08	5.66735e-08	Ptpn1/S100a8/Ptgs2/S100a9/Snai1/Hif1a/Ier3/Epha2/Plaur/Tnf/Ero1l/Sod2/Cyp1b1/Casp4/Myc/Itpr1/Pik3r1/Sfn/Bcl3/Hmox1/Mmp9/Mybbp1a/P4hb/Atf4/Bid/Map2k1/Cebpb/Rrp8/Ddit4/Syvn1/Cd44/Ikbke/Ripk3/Dapk2/Ppif/Trp53/Aen/Ddx5/Mcl1/Arl6ip5/Erp29/Selenos/Pmaip1/Prkra/Tnfrsf1b/Hyou1/Lgals12/Mapk8ip1/Opa1/Dyrk2/Mif/Rrm2b/Trib3/Creb3l1/Hint1	55
GO:0002237	response to molecule of bacterial origin	65/1817	376/23174	1.19094e-09	1.00039e-07	7.03339e-08	Cxcl1/Nlrp3/Lyn/Ptgs2/Cxcl2/Il1b/Zfp36/Zc3h12a/Acod1/Serpine1/Cxcl15/Slc11a1/C5ar1/Cxcl5/Cd80/Pdcd4/Noct/Tnf/Tap2/Nfkbia/Ankrd1/Junb/Ppbp/Ccl2/Tnfaip3/Tnip3/Tgfb1/Il1rn/Pf4/Cxcl3/Ogt/Sbno2/Il6/Myd88/Cebpb/Pde4b/Cd300lb/Adam17/Vim/Pde2a/Nod2/Ncf2/Cmpk2/Selenos/Trib1/Tnfrsf11a/Nfkbib/Tnfrsf1b/Dusp10/Ptgir/Trim6/Adm/Nos3/Cd68/Mif/Cactin/Cited1/P2rx7/Cd36/Rps6ka3/Cd84/Ccl12/Plscr4/Fcgr2b/Ptafr	65
GO:0006869	lipid transport	59/1817	328/23174	1.47687e-09	1.21459e-07	8.53941e-08	Abca8a/Il1b/Anxa2/Abca8b/Tex2/Slco2a1/Soat2/Spns3/Inhba/Cyp4f18/Msr1/Acsl1/Nfkbia/Pla2g2d/Osbpl6/Pnpla8/Abcc4/Ncor1/Kcnn4/Ldlr/Ttc39b/Anxa1/Lrp1/Atp8b1/Relch/Lrp6/Slc27a1/Pitpna/Slco2b1/Thbs1/Adipoq/Acsl5/Scarb2/Pparg/C1qtnf1/Stoml1/Nucb2/Slc10a6/Tnfrsf11a/Ptch1/Spns2/Cry2/Abca6/Sigmar1/Soat1/Edn1/Atp10b/Atp8b4/Mif/Vldlr/Mfsd2a/Plekha3/Lipg/P2rx7/Ldlrap1/Cd36/Abca9/Abcc1/Atp8b5	59
GO:0042063	gliogenesis	58/1817	321/23174	1.70641e-09	1.38078e-07	9.70783e-08	S100a8/Itgam/Ndrg1/Lyn/Csf1/Il1b/S100a9/Fpr2/Areg/Lif/Afdn/B4galt5/Nfib/C5ar1/Tcf7l2/Tnf/Vcan/Myc/Enpp2/Pten/Ccl2/Ccl3/Tgfb1/Sox6/Atxn1/Nrg1/Ntrk2/Sox9/Ldlr/Mboat7/Il6/Map2k1/Cxcr4/Anxa1/Lrp1/Hes1/Vim/Pdgfb/Syne2/Lrp6/Dbi/Egr2/Pparg/Tnfrsf1b/Prmt5/Dusp10/Ncmap/Mpp5/Plp1/Ilk/Nrros/Serpine2/Sox10/Nfix/Atf5/Ccl12/Hdac11/Etv5	58
GO:0045666	positive regulation of neuron differentiation	74/1817	458/23174	1.95814e-09	1.54203e-07	1.08415e-07	Socs2/Mmd2/Adamts1/Ptpn5/Ret/Lyn/S100a9/Dbn1/Cdkl5/Sgk1/Lif/Afdn/Sphk1/Ngfr/Kctd11/Lpar1/Cxcl5/Ngf/Bdnf/Cfl1/Impact/Ehd1/Enc1/Ankrd1/Itga6/Pten/Itpr1/Nme1/Picalm/Nrg1/Ntrk2/Sema7a/Il6/Map2k1/Cxcr4/Gdf6/Srf/Lrp1/Adam17/Bcl11a/Lrp6/Rac1/Ccr5/P3h1/Tgif1/Kidins220/Map1b/Gdf5/Scarb2/Prox1/Ncoa1/Mfn1/Ppp1r9a/Fzd1/Ptprf/Nr3c1/Opa1/Mif/Trak1/Ddx56/Arhgap35/Vldlr/Sema4d/Nlgn2/Limk1/Robo2/Gprc5b/Duoxa1/Ilk…	74
GO:0006979	response to oxidative stress	67/1817	401/23174	2.83191e-09	2.11674e-07	1.48821e-07	Gpx3/Sesn3/Ptgs2/Hif1a/Zc3h12a/Hp/Plk3/Slc7a11/Sphk1/Ngfr/Acox2/Nr4a3/Pdgfra/Fbxo7/Cfl1/Impact/Tnf/Sod2/Dapk1/Cyp1b1/Mmp3/Kcnc2/Tnfaip3/Hmox1/Smpd3/Gab1/Mmp9/P4hb/Psmb5/Ercc1/Fos/Fut8/Atf4/Egln1/Il6/Slc25a24/Map2k1/Prkaa2/Trpm2/Anxa1/Gsr/Nr4a2/Ripk3/Atrn/Ppif/Trp53/Slc11a2/Mcl1/Thbs1/Adipoq/Arl6ip5/Selenos/Mill2/Prkra/Hk3/Fzd1/Sigmar1/G6pdx/Apex1/Nos3/Ucp3/Chd6/Rrm2b/Bcar1/Cd36/Etv5/Abcc1	67
GO:0003018	vascular process in circulatory system	42/1817	200/23174	3.25396e-09	2.39166e-07	1.6815e-07	Ptgs2/Hif1a/Akap12/Mgll/Cxcr2/Tnf/Sod2/Ece1/Dusp5/Tgfb1/Ccl4/Smpd3/Ddah1/Gja5/Adora2b/Icam1/Map2k1/Gja1/Pdgfb/Pde2a/Hmgcr/C2cd4b/Gucy1a1/Adcy6/Adra2a/G6pdx/Per2/Nr3c1/Edn1/Slit2/Adm/Nos3/Foxc1/Manf/Arhgap35/Trpv4/Alox5/Arhgap42/Angpt1/Pde3a/Ptafr/Atp1a2	42
GO:0042110	T cell activation	77/1817	491/23174	3.64489e-09	2.63508e-07	1.85264e-07	Il4ra/Itgam/Nlrp3/Sema4a/Sftpd/Il1b/Clec4e/Zc3h12a/Slc11a1/Cd80/Ctps/Il6ra/Nedd4/Adam8/Rora/Clec4d/Il23a/Cd244a/Ccl2/Arg2/Dock8/Ephb6/Pla2g2d/Tgfb1/Fcer1g/Bcl3/Ncor1/Ada/Relb/Kat2a/Cd209e/Icam1/Il6/Foxj1/Stx11/Cxcr4/Cebpb/Skint2/Gja1/Slfn1/Sdc4/Anxa1/Srf/Msn/Adam17/Cd44/Hes1/Nfkbid/Satb1/Ripk3/Bcl11a/Trp53/Nrarp/Ccr6/Zfp36l1/Mill2/Tnfrsf1b/Dusp10/Lgals1/Gadd45g/Tarm1/Mapk8ip1/Gpam/Prkcq/Lgals3/My…	77
GO:0006644	phospholipid metabolic process	60/1817	346/23174	4.55451e-09	3.04324e-07	2.1396e-07	Isyna1/Socs2/Lyn/Socs3/Fpr2/Pdgfra/Sgms2/Pik3cb/Enpp2/Pten/Pik3r1/Pla2g2d/Tgfb1/Agpat5/Gpat4/Smpd3/Pigg/Pnpla8/Adgrf5/Ldlr/Mboat7/Cish/Pdgfa/Pla2g7/Plek/Pik3ip1/Samd8/Pdgfb/Pik3c2a/Nod2/Fgr/Pik3r5/Agpat4/Rac1/Far1/Slc27a1/Pgs1/Dbi/Pi4k2a/Plcg1/Acsl5/Flt1/Inpp4b/Plpp1/Pik3ca/Pik3r4/Plaat3/Pik3c2b/Plpp5/Dgka/Fdft1/Tmem38b/Pigz/Rubcn/Gpam/Atg14/Hmgcs2/Fabp5/Tmem150a/Smpd5	60
GO:0008361	regulation of cell size	43/1817	210/23174	4.7582e-09	3.15544e-07	2.21848e-07	Ret/Sema4a/Dbn1/Cdkl5/Mgll/C1qtnf9/Ngf/Bdnf/Cfl1/Deptor/Spg20/Pten/Sema6b/Tnr/Nrg1/Slc12a4/Ogt/Kcnn4/Sema7a/Plek/Srf/Lrp1/E2f4/Bcl11a/Sema4c/Rac1/Ccr5/Map1b/Ifrd1/Sema3f/Atp2b2/Edn1/Slit2/Clns1a/Sema4d/Limk1/Ilk/P2rx7/Sema6c/Akt3/Slc12a2/Ulk2/Olfm1	43
GO:0044403	symbiont process	61/1817	355/23174	4.86326e-09	3.20104e-07	2.25055e-07	Cxcl1/Sftpd/Anxa2/Trem1/Zfp36/Zc3h12a/Ctsb/Ifitm2/Pfn1/Ptx3/Cxcl5/Trem3/Pcsk5/Cfl1/Ifitm1/Tnf/Myc/Trim8/Ifitm6/Tgfb1/Ccl4/Pf4/Mmp9/Zfp72/P4hb/Isg15/Oas3/Icam1/Myd88/Tnip1/Ddx6/Cxcr4/Ifitm3/Ppib/Eif3b/Slc20a2/Ripk3/Kpna2/Nod2/Trp53/Trim28/Ccr5/Rnasel/Ddx5/Trim15/Rrp1b/Gucy1a1/Prox1/Pde12/Lgals1/Trim6/Ddx39b/Gbp3/Chmp4b/Oasl1/Pcbp1/Trim30a/Chmp4c/Cd36/Banf1/Ulk2	61
GO:0071706	tumor necrosis factor superfamily cytokine production	37/1817	166/23174	5.10093e-09	3.33261e-07	2.34305e-07	C5ar2/Mmp8/Zfp36/Akap12/Zc3h12a/Cidea/Adam8/Il23a/Pik3r1/Ccl2/Ccl3/Tnfaip3/Arg2/Lpl/Fcer1g/Bcl3/Ccl4/Errfi1/Pf4/Myd88/Tmem106a/Nod2/Ccr5/Thbs1/Adipoq/Zbtb20/Selenos/Fcgr3/Mif/Cactin/Trim30a/Cd36/Angpt1/Cd84/Arrb2/Tlr3/Ptafr	37
GO:0048638	regulation of developmental growth	66/1817	399/23174	5.61244e-09	3.63983e-07	2.55905e-07	Socs2/Dio3/Sema4a/Csf1/Dbn1/Cdkl5/Mgll/Serpine1/Dusp6/Afdn/Tcf7l2/Ngf/Bdnf/Cfl1/Kcnk2/Lgmn/Fgfr2/Spg20/Pten/Picalm/Sema6b/Gpat4/Tnr/Nrg1/Ncor1/Ccn4/Sema7a/Gdf15/Cxcr4/Pim1/Gja1/Srf/Lrp1/Sh3pxd2b/Plac8/Ppib/Sfrp1/Atrn/Bcl11a/Sema4c/Ccr5/Ppp2r3a/Map1b/Gdf5/Prox1/Ifrd1/Pik3ca/Nipbl/Ptch1/Cdkn1b/Dusp10/G6pdx/Ddx39b/Sema3f/Nr3c1/Edn1/Slit2/Gpam/Foxc1/Sema4d/Limk1/Ilk/Erbb4/Sema6c/Ulk2/Olfm1	66
GO:0034599	cellular response to oxidative stress	50/1817	268/23174	7.49483e-09	4.65524e-07	3.27294e-07	Hif1a/Zc3h12a/Slc7a11/Sphk1/Ngfr/Nr4a3/Pdgfra/Fbxo7/Cfl1/Impact/Tnf/Sod2/Dapk1/Cyp1b1/Mmp3/Kcnc2/Tnfaip3/Hmox1/Smpd3/Mmp9/P4hb/Fos/Fut8/Atf4/Il6/Slc25a24/Prkaa2/Trpm2/Anxa1/Gsr/Nr4a2/Ripk3/Ppif/Trp53/Slc11a2/Mcl1/Thbs1/Arl6ip5/Selenos/Prkra/Hk3/Fzd1/Sigmar1/G6pdx/Apex1/Nos3/Chd6/Bcar1/Cd36/Etv5	50
GO:0007409	axonogenesis	73/1817	466/23174	9.70451e-09	5.63117e-07	3.95909e-07	Ret/Sema4a/Raph1/Dbn1/Cdkl5/Actb/Mgll/Epha2/Ngfr/Nr4a3/B4galt5/Nfib/Ngf/Bdnf/Slitrk4/Celsr3/Fgfr2/Spg20/Lgr4/Pten/Emb/Picalm/Ephb6/Neo1/Sema6b/Tnr/Nrg1/Chl1/Ntrk2/Sema7a/Map2k1/Cxcr4/Srf/Lrp1/Dst/Nr4a2/Vim/Bcl11a/Etv4/Sema4c/Rac1/Ccr5/Vasp/Pitpna/Tsku/Nptx1/Egr2/Map1b/Ifrd1/Ptch1/Zswim8/Ablim1/Sema3f/Slit2/Kif13b/Trak1/Arhgap35/Sema4d/Limk1/Robo2/Map1a/Arhgef28/Ilk/Alcam/Ephb4/Sema6c/Artn/Lrp4/Ki…	73
GO:0006913	nucleocytoplasmic transport	52/1817	287/23174	1.06314e-08	6.04961e-07	4.25328e-07	Ptgs2/Zc3h12a/Ier3/Tcf7l2/Cfl1/Ddx39/Nfkbia/Pik3r1/Sfn/Pkd1/Nup93/Tgfb1/Atxn1/Chp2/Eif6/Eif5a/Polr2d/Sdad1/Nol6/Zfp593/Kpna2/Trp53/Trim28/Ddx5/Ptpn14/Pom121/Egr2/Appl2/Inpp4b/Fermt1/Rasl2-9/Ltv1/Rangap1/Cry2/Ran/Cdh1/Phip/Ddx39b/Nutf2/Calr/Phb2/Prkcq/Khdrbs1/Cited1/Bag3/Pkia/Cd36/Angpt1/Nxf7/Rrs1/Nxt1/Lmna	52
GO:0051169	nuclear transport	52/1817	287/23174	1.06314e-08	6.04961e-07	4.25328e-07	Ptgs2/Zc3h12a/Ier3/Tcf7l2/Cfl1/Ddx39/Nfkbia/Pik3r1/Sfn/Pkd1/Nup93/Tgfb1/Atxn1/Chp2/Eif6/Eif5a/Polr2d/Sdad1/Nol6/Zfp593/Kpna2/Trp53/Trim28/Ddx5/Ptpn14/Pom121/Egr2/Appl2/Inpp4b/Fermt1/Rasl2-9/Ltv1/Rangap1/Cry2/Ran/Cdh1/Phip/Ddx39b/Nutf2/Calr/Phb2/Prkcq/Khdrbs1/Cited1/Bag3/Pkia/Cd36/Angpt1/Nxf7/Rrs1/Nxt1/Lmna	52
GO:0031348	negative regulation of defense response	43/1817	217/23174	1.32839e-08	7.32278e-07	5.1484e-07	Rb1/Il1r2/Cd200/Nlrp3/Socs3/Fpr2/Zfp36/Zc3h12a/Ier3/Acod1/Nt5e/Ccr1/Nlrp12/Pdcd4/Fndc4/Tap2/Rora/Tnfaip3/Arg2/Mefv/Nr1d2/Metrnl/Ada/Ldlr/Cd200r1/Cd44/Nod2/Tnfaip6/Adipoq/Appl2/Pparg/Selenos/Mill2/Tnfrsf1b/Dusp10/Slit2/Cactin/Dhx58/Siglece/Samhd1/Arrb2/Fgl2/Fcgr2b	43
GO:0001701	in utero embryonic development	76/1817	498/23174	1.53264e-08	8.34437e-07	5.86666e-07	Socs3/Snai1/Hif1a/Hbegf/Lif/Ncoa3/Pdgfra/Fgfr2/Junb/Nfe2/Pkd1/Tet1/Sox6/Maff/Nle1/Gab1/Rpl7l1/Slc39a1/Ada/Arhgdig/Kat2a/Ccn1/Egln1/Map2k1/Cebpb/Birc6/Gja1/Syvn1/Srf/Fosl1/Dsc3/Tjp1/Hes1/Klf2/Pdgfb/Krt8/Trp53/Acvr1/Trim28/Nop2/Kidins220/Plcg1/Mbd3/Epn2/Tm4sf1/Ncoa1/Zfp36l1/Ptch1/Mafg/Cdh1/Edn1/Slit2/Adm/Nos3/Bcor/Taf8/Foxc1/Wdr19/Ifitm5/Cited1/Myb/Krt19/Sox10/Eif2s2/Tanc2/Rpgrip1l/Angpt1/Bysl/C2cd…	76
GO:0050866	negative regulation of cell activation	41/1817	203/23174	1.6269e-08	8.69651e-07	6.11423e-07	Il4ra/Cd200/Lyn/Sftpd/Zc3h12a/Cd300lf/Pdgfra/Fbxo7/Cd80/Tnfaip3/Arg2/Pla2g2d/Emilin1/Tgfb1/Hmox1/Adgrf5/Ldlr/Foxj1/Pdgfa/Cebpb/Skint2/Slfn1/Sdc4/Anxa1/Cd44/Nfkbid/Pdgfb/Sfrp1/Pparg/C1qtnf1/Nrarp/Tarm1/Lgals3/Serpine2/Cblb/Cd84/Cbfb/Ubash3b/Fgl2/Fcgr2b/Vtcn1	41
GO:0045088	regulation of innate immune response	51/1817	285/23174	2.24209e-08	1.16325e-06	8.17842e-07	Lyn/Esr1/Fpr2/Clec4e/Pik3ap1/Acod1/Cd300lf/Mndal/Ccr1/Trem3/Tnf/Tap2/Nfkbia/Adam8/Tmem173/Ereg/Lgr4/Tlr13/Tnfaip3/Tnip3/B430306N03Rik/Il18rap/Pvr/Myd88/Tnip1/9830107B12Rik/Treml4/Ikbke/Tril/Nod2/Fgr/Tlr11/A530064D06Rik/Trim15/Appl2/Reg3g/Pparg/Mill2/Dusp10/Trim6/Cactin/Dhx58/Hpx/Pja2/Trim30a/Samhd1/Cd36/Rps6ka3/Arrb2/Vav1/Tlr3	51
GO:0002263	cell activation involved in immune response	49/1817	272/23174	3.3796e-08	1.71311e-06	1.20443e-06	Il4ra/Itgam/Nlrp3/Lyn/Sema4a/Clec4e/Zc3h12a/Nr4a3/Slc11a1/Rora/Clec4d/Il23a/Cd244a/Tnfaip3/Tgfb1/Fcer1g/Bcl3/Hmox1/Ercc1/Ada/Relb/Sbno2/Adora2b/Icam1/Ywhaz/Il6/Stx11/Anxa1/Lrp1/Nfkbid/Fgr/Trp53/Cd177/Pi4k2a/Ccr6/Lgals1/Gadd45g/Shld2/Lgals3/Myb/Lat2/Cd84/Kit/Itgb2/Fgl2/Ptafr/Dysf/Rorc/Shb	49
GO:1903829	positive regulation of cellular protein localization	52/1817	297/23174	3.45862e-08	1.74314e-06	1.22555e-06	Ptpn5/Ptgs2/Zc3h12a/Plk3/Lif/Epha2/Ngfr/Rhog/Tcf7l2/Cfl1/Tnf/Cd2ap/Trim8/Pik3r1/Ccl2/Sfn/Tgfb1/Fcer1g/Numa1/Nrg1/Cacnb4/Ogt/Chp2/Prkaa2/Gnl3/Sptbn1/Lrp1/Msn/Trim28/Snx33/Cct3/Arpc2/Pmaip1/Tcaf1/Nipbl/Nkd2/Ran/Cdt1/Cdh1/Cnst/Nutf2/Glis2/Nlgn2/Chrm1/Prkcq/Lgals3/Map1a/Bag3/Erbb4/Lrp4/Cacnb3/Kif3a	52
GO:0000082	G1/S transition of mitotic cell cycle	36/1817	171/23174	3.94621e-08	1.97642e-06	1.38955e-06	Rb1/Adamts1/Rhou/Plk3/Jade1/Inhba/Fbxo7/Pdpn/Rcc1/Pten/Pkd1/Tjp3/Plk2/Cacnb4/Cul4b/Psme3/Bid/Slfn1/Anxa1/Hacd1/Cables1/E2f4/Adam17/Eif4e/Fam107a/Trp53/Acvr1/Klf11/Cdkn1b/Apex1/Taf10/Cradd/Myb/Cdc45/Ccl12/Cdk2ap2	36
GO:0048872	homeostasis of number of cells	54/1817	315/23174	3.96628e-08	1.97642e-06	1.38955e-06	Rb1/Lyn/Csf1/Hif1a/Zfp36/Slc7a11/Afdn/Inhba/Cxcl5/Cxcr2/Pik3cb/Lgr4/Ccl2/Tnfaip3/Tgfb1/Fcer1g/Sox6/Hmox1/Nle1/Hcar2/Ncor1/Ada/Isg15/Sox9/Adgrf5/Il6/Pde4b/Anxa1/Srf/Adam17/Cd44/Klf2/Ripk3/Rac1/Ezh1/Lyar/Slc11a2/Spi1/Zfp36l1/Pmaip1/Spns2/G6pdx/Nos3/Mif/Gpam/Sh2b2/Gcnt4/Myb/Kmt2a/P2rx7/Kit/Kif3a/Akt3/Fcgr2b	54
GO:0072521	purine-containing compound metabolic process	73/1817	484/23174	4.7953e-08	2.3761e-06	1.67056e-06	Hif1a/Ier3/Epha2/Adssl1/Nt5e/Slc2a9/Bdnf/Abcg2/Acsl1/Myc/Rora/Nme1/Tgfb1/Gpat4/Prxl2c/Aprt/Cacnb4/Ncor1/Ada/Ogt/Adora2b/Pid1/Slc25a25/Bid/Acot8/Map2k1/Prkaa2/Ehhadh/Ddit4/Eif6/Pde2a/Ppif/Aox1/Trp53/Ak2/Nudt7/Far1/Hmgcr/Mpc2/Ak1/Uqcrq/Pank3/Gucy1a1/Aldoc/Acsl5/Zbtb20/Ces1d/Pde12/Mfn1/Pgam1/Entpd1/Adcy6/Hk3/Ampd2/Ran/Atp2b2/Nos3/Aox3/Adpgk/Opa1/Mif/Gpam/Hmgcs2/Eno2/Coasy/Pfkfb2/Samhd1/Acadsb/P2rx7/…	73
GO:0090287	regulation of cellular response to growth factor stimulus	48/1817	267/23174	4.96693e-08	2.4338e-06	1.71112e-06	Zfp703/Itga8/Ptpn1/Hif1a/Spry4/Ngfr/Tcf7l2/Ngf/Fstl3/Cidea/Nedd4/Spg20/Spry2/Grem2/Rasl11b/Neo1/Emilin1/Tgfb1/Numa1/Ccn1/Vasn/Glg1/Adam17/Hes1/Pdgfb/Sfrp1/Trp53/Fbn2/Adgra2/Dstyk/Thbs1/Cd63/Gdf5/Flt1/Pmepa1/Epn2/Fermt1/Chrdl2/Fzd1/Ptprf/Slit2/Ilk/Nrros/Fam72a/Angpt1/Stub1/Chrdl1/Creb3l1	48
GO:0002699	positive regulation of immune effector process	47/1817	259/23174	5.07876e-08	2.47484e-06	1.73998e-06	Il4ra/Cxcl1/Itgam/Nlrp3/Lyn/Il1b/Il1r1/Nr4a3/Tnf/Tap2/Il23a/Cd244a/Ccl2/Tgfb1/Fcer1g/Hmox1/Il18rap/Pvr/Adora2b/Sema7a/Il6/Anxa1/Myo18a/Nfkbid/Nod2/Fgr/Fcgr1/Cd177/Trim15/Appl2/Mill2/Ddx21/Fcgr3/Trim6/Mif/Dhx58/Shld2/Hpx/Gprc5b/Myb/P2rx7/Cd36/Cd84/Vav1/Itgb2/Ptafr/Shb	47
GO:0030278	regulation of ossification	44/1817	235/23174	5.24776e-08	2.5155e-06	1.76857e-06	Csf1/Hif1a/Pdlim7/Areg/Ecm1/Id1/Ccr1/Noct/Tnf/Nfe2/Tgfb1/Thrb/Srgn/Ccn4/Isg15/Sox9/Ccn1/Il6/Cebpb/Gja1/Sfrp1/Lrp6/Acvr1/Fbn2/Dhrs3/Ddx5/P3h1/Egr2/Ltbp3/Nipbl/Ptch1/Id3/Bcor/Sema4d/Ifitm5/Cited1/Igfbp5/Ilk/P2rx7/Lrp4/Cebpd/Lmna/Creb3l1/Bmp2k	44
GO:0002367	cytokine production involved in immune response	26/1817	102/23174	5.44684e-08	2.59682e-06	1.82574e-06	Nlrp3/Il1b/Trem1/Il1r1/Nr4a3/Slc11a1/Trem3/Tnf/Tgfb1/Fcer1g/Hmox1/Il18rap/Sema7a/Il6/Tril/Nod2/Tnfrsf1b/Ddx21/Trim6/Mif/Crlf2/Gprc5b/Cd36/Angpt1/Kit/Tlr3	26
GO:1905954	positive regulation of lipid localization	24/1817	89/23174	5.47857e-08	2.5979e-06	1.8265e-06	Il1b/Anxa2/Zc3h12a/Cyp4f18/Msr1/Ehd1/Nfkbia/Cidea/Lpl/Lrp1/Ikbke/Hilpda/Adipoq/Acsl5/C1qtnf1/Nucb2/Tnfrsf11a/Ptch1/Edn1/Mif/Lipg/P2rx7/Ldlrap1/Cd36	24
GO:0035690	cellular response to drug	61/1817	379/23174	5.85773e-08	2.73361e-06	1.92191e-06	Il1b/Zc3h12a/Actb/Acod1/Serpine1/Sphk1/Nr4a3/Fbxo7/Timeless/Cfl1/Impact/Tnf/Cyp1b1/Ankrd1/Myc/Pten/Kcnc2/Tnfaip3/Itpr2/Tgfb1/Ccl4/Hmox1/Smpd3/Gnai2/Slc31a1/Atrx/Atf4/Sox9/Il6/Prkaa2/Ddit4/Trpm2/Pde4b/Anxa1/Eif4e/Vim/Pdgfb/Sfrp1/Ripk3/Pde2a/Nod2/Ppif/Trp53/Adam15/Thbs1/Adipoq/Kcnq1/Ncoa1/Arpc2/Adcy6/Hk3/Sigmar1/Cdh1/Tmem38b/Apex1/Nr3c1/Slit2/Chrm1/Kmt2a/Rap1b/Bcar1	61
GO:0043114	regulation of vascular permeability	14/1817	33/23174	6.21567e-08	2.87027e-06	2.01799e-06	Akap12/Cxcr2/Tgfb1/Ccl4/Ddah1/Pde2a/C2cd4b/Nr3c1/Slit2/Adm/Arhgap35/Trpv4/Angpt1/Pde3a	14
GO:0051098	regulation of binding	63/1817	399/23174	7.35742e-08	3.31084e-06	2.32774e-06	Rb1/Spon1/Plcl1/Mmp8/Anxa2/Actb/Csf3/S100a10/Lif/Plaur/Id1/Nfib/Tcf7l2/Ngf/Hspa4/Bdnf/Myc/Tmem173/Grem2/Nme1/Pkd1/Ephb6/Tgfb1/Hmox1/Mmp9/Plk2/Lrp1/Itga2/Hes1/Pdgfb/Zfp593/Trim28/Adam15/Adipoq/Pparg/Ifit2/Gtf2f1/Ttbk2/Nipbl/Eif4a3/Ran/Mapre1/Ptprf/Per2/Cdt1/Trim6/Dph3/Taf10/Id3/Foxc1/Lgals3/Cald1/Cblb/Ldlrap1/Cd36/Angpt1/Arrb2/Trib3/Stub1/Ubash3b/Tnks/Dysf/Mdfi	63
GO:2001057	reactive nitrogen species metabolic process	23/1817	84/23174	7.58187e-08	3.3604e-06	2.36259e-06	Esr1/Ptgs2/Il1b/Mmp8/Zc3h12a/Ptx3/Tnf/Sod2/Cyp1b1/Rora/Smpd3/Ddah1/Icam1/Il6/Tmem106a/Gla/Klf2/Rac1/Selenos/Dynll1/Nos3/Cd36/Itgb2	23
GO:0002444	myeloid leukocyte mediated immunity	25/1817	97/23174	7.72393e-08	3.40625e-06	2.39483e-06	Il4ra/Cxcl1/Itgam/Lyn/Trem1/Nr4a3/Cxcl5/Trem3/Fcer1g/Hmox1/Adora2b/Ywhaz/Stx11/Cd300lb/Fgr/Fcgr1/Cd177/Pi4k2a/Ddx21/Fcgr3/Lat2/Cd84/Kit/Itgb2/Ptafr	25
GO:0006109	regulation of carbohydrate metabolic process	37/1817	183/23174	7.7829e-08	3.41518e-06	2.4011e-06	Hif1a/Ier3/Tcf7l2/Myc/Rora/Cd244a/Midn/Tgfb1/Prxl2c/Smpd3/Has2/Ncor1/Ogt/Kat2a/Adcyap1r1/Il6/Prkaa2/Plek/Ddit4/Eif6/Pdgfb/Trp53/Adipoq/Zbtb20/Scarb2/C1qtnf1/Pgam1/Nr3c1/Dyrk2/Mif/Epm2aip1/Pfkfb2/Igfbp5/P2rx7/Foxk1/Ptafr/Rorc	37
GO:0022613	ribonucleoprotein complex biogenesis	66/1817	427/23174	8.2647e-08	3.60865e-06	2.53712e-06	Noct/Rps2/Pten/Snrpd2/Mrpl20/Nle1/Rpl7l1/Mybbp1a/Nop16/Cul4b/Nhp2/Gar1/Ddx6/Grb7/Prkaa2/Rrp8/Eif6/Polr2d/Ebna1bp2/Rpl10a/Nip7/Ppan/Sdad1/Nol6/Zfp593/Mrto4/Ftsj3/Las1l/Rnasel/Nat10/Lyar/Nop56/Nop2/Bop1/Rrp1b/Ddx28/Rrp9/Ltv1/Utp18/Prmt5/G3bp1/Ddx21/Nob1/Ran/Snrpb/Rsl24d1/Sf3a2/Ddx39b/Heatr1/Naf1/Usp36/Pak1ip1/Clns1a/Ddx56/Exosc2/Rrp15/Ruvbl1/Noc4l/Snrpd1/Dync1h1/Eif2s2/Nop58/Rpf2/Bysl/Rrs1/Eif4b	66
GO:0007346	regulation of mitotic cell cycle	73/1817	492/23174	9.38441e-08	4.07736e-06	2.86666e-06	Rb1/Adamts1/Esr1/Il1b/Ier3/Plk3/Jade1/Sphk1/Fbxo7/Tnf/Bub3/Btg1/Pdpn/Lgmn/Fgfr2/Myc/Ereg/Rcc1/Pten/Tubg1/Pkd1/Tgfb1/Numa1/Nle1/Smpd3/Tjp3/Plk2/Cacnb4/Lmnb1/Atrx/Cul4b/Psme3/Bid/Slfn1/Anxa1/Hacd1/Nek6/Adam17/Eif4e/Hes1/Pdgfb/Fam107a/Trp53/Pim3/Zfp36l1/Nipbl/Ptch1/Cdkn1b/Cdk5rap2/Cdt1/Tom1l1/Phip/Apex1/Edn1/Cradd/Chmp4b/Phb2/Cks2/Foxc1/Prkcq/Pkia/Cdc45/Dync1h1/Klhl22/Chmp4c/Ccl12/Ranbp1/Asah2/Cdk2a…	73
GO:0001558	regulation of cell growth	66/1817	429/23174	9.88204e-08	4.25169e-06	2.98922e-06	Rb1/Socs2/Sema4a/Dbn1/Cdkl5/Sgk1/Hbegf/Mgll/Afdn/Sphk1/Ncoa3/Inhba/Mndal/Ngf/Bdnf/Cfl1/Spg20/Sfn/Picalm/Tgfb1/Sema6b/Tnr/Ccn5/Krt17/Nrg1/Sertad1/Ccn4/Sema7a/Cxcr4/Gja1/Srf/Lrp1/Adam17/Cd44/Ppan/Fam107a/Sfrp1/Dcbld2/Bcl11a/Trp53/Sema4c/Ccr5/Adam15/P3h1/Smarca2/Map1b/Pparg/Ifrd1/Hsd3b7/Cdkn1b/G6pdx/Ddx39b/Sema3f/Nr3c1/Edn1/Slit2/Exosc2/Sema4d/Limk1/Igfbp5/Ilk/Serpine2/Sema6c/Klhl22/Ulk2/Olfm1	66
GO:0043903	regulation of symbiosis, encompassing mutualism through parasitism	41/1817	216/23174	1.00047e-07	4.28355e-06	3.01163e-06	Cxcl1/Sftpd/Anxa2/Zfp36/Zc3h12a/Ifitm2/Pfn1/Ptx3/Cxcl5/Cfl1/Ifitm1/Tnf/Trim8/Ifitm6/Ccl4/Zfp72/P4hb/Isg15/Oas3/Myd88/Cxcr4/Ifitm3/Ppib/Kpna2/Nod2/Trim28/Ccr5/Rnasel/Ddx5/Trim15/Rrp1b/Prox1/Pde12/Lgals1/Trim6/Chmp4b/Oasl1/Trim30a/Chmp4c/Cd36/Banf1	41
GO:0060560	developmental growth involved in morphogenesis	47/1817	268/23174	1.47394e-07	5.88243e-06	4.13574e-06	Sema4a/Raph1/Esr1/Csf1/Dbn1/Cdkl5/Areg/Mgll/Afdn/Ngf/Ccl11/Bdnf/Cfl1/Impact/Fgfr2/Spg20/Spry2/Picalm/Tgfb1/Sema6b/Tnr/Nrg1/Sox9/Sema7a/Cxcr4/Srf/Lrp1/Sfrp1/Bcl11a/Lrp6/Sema4c/Trim28/Ccr5/Ppp2r3a/Map1b/Ifrd1/Sema3f/Slit2/Sema4d/Limk1/Ilk/Sema6c/Llph/Slc12a2/Ulk2/Rdh10/Olfm1	47
GO:0008544	epidermis development	53/1817	323/23174	2.27232e-07	8.31612e-06	5.84679e-06	Ptgs2/Snai1/Zfp36/Madcam1/Epha2/Ngfr/Ncoa3/Inhba/Tnf/Fgfr2/Lgr4/Sfn/Numa1/Maff/Errfi1/Krt17/Gab1/Sox9/Vdr/Map2k1/Pdgfa/Anxa1/Tfdp1/Hes1/Fosl2/Satb1/Rac1/Plod1/Dbi/Evpl/Reg3g/Fermt1/Ift172/Ppl/Zfp36l1/Exph5/Ptch1/Dsp/Mafg/Atp2b2/Irf6/Foxc1/Clic4/Igfbp5/Prss8/Trps1/Tgm1/Atp2c1/Lrp4/Kif3a/Tnfrsf19/Cers3/Igf1r	53
GO:0006809	nitric oxide biosynthetic process	21/1817	76/23174	2.33538e-07	8.51158e-06	5.98422e-06	Esr1/Ptgs2/Il1b/Mmp8/Zc3h12a/Ptx3/Tnf/Sod2/Cyp1b1/Rora/Smpd3/Ddah1/Icam1/Il6/Gla/Klf2/Rac1/Dynll1/Nos3/Cd36/Itgb2	21
GO:0050878	regulation of body fluid levels	55/1817	342/23174	2.65898e-07	9.57231e-06	6.72998e-06	Socs2/Lyn/F10/S100a9/Anxa2/Hif1a/Tmprss13/Slc7a11/Serpine1/Pdgfra/Rap2b/Cldn4/Pdpn/Pik3cb/Nme1/Sfn/Fcer1g/Gpat4/Aprt/Pf4/Gnai2/Oas2/Ada/Kcnn4/Gja5/Vdr/F5/Cldn1/F13a1/Pdgfa/Plek/Gja1/Selp/Srf/F8/Pdgfb/Aqp7/Thbs1/Tspan8/C1qtnf1/Entpd1/Adcy6/Cdh1/Atp2b2/Edn1/Adm/Chrm1/Trpv4/Prkcq/Tpsab1/Serpine2/Erbb4/Thbd/Cd36/Ubash3b	55
GO:0061448	connective tissue development	48/1817	282/23174	2.75355e-07	9.83252e-06	6.91292e-06	Csf1/Anxa2/Snai1/Hif1a/Fbxw4/Ecm1/Nfib/Il6ra/Spg20/Amer1/Pkd1/Tgfb1/Sox6/Smpd3/Thrb/Ccn4/Stc1/Sox9/Ccn1/Slc25a25/Bmp3/Glg1/Gdf6/Srf/Sh3pxd2b/Barx2/Pdgfb/Lrp6/Thbs1/Ccn2/Gdf5/Loxl2/Ltbp3/Pik3ca/Prrx2/Chrdl2/Plaat3/Hspg2/Col5a1/Edn1/Col9a1/Trpv4/Trps1/Col12a1/Lmna/Col6a1/Itgb8/Rorc	48
GO:0002573	myeloid leukocyte differentiation	40/1817	216/23174	2.82245e-07	9.95762e-06	7.00087e-06	Rb1/Itgam/Lyn/Csf1/Anxa2/Csf3/Lif/Epha2/Cd300lf/Ccr1/Tnf/Fstl3/Myc/Adam8/Junb/Il23a/Nme1/Pik3r1/Ccl3/Tgfb1/Fcer1g/Pf4/Ccn4/Relb/Fos/Sbno2/Cebpb/Sfrp1/Prxl2a/Spi1/Adipoq/Pparg/Inpp4b/Trib1/Zfp36l1/Tnfrsf11a/Nrros/Kit/Ubash3b/Ltbr	40
GO:0051783	regulation of nuclear division	37/1817	194/23174	3.65234e-07	1.24377e-05	8.74455e-06	Rb1/Osm/Esr1/Il1b/Lif/Sphk1/Tnf/Bub3/Fgfr2/Ereg/Rcc1/Tubg1/Tgfb1/Numa1/Smpd3/Atrx/Nek6/Pdgfb/Nipbl/Cdkn1b/Cdk5rap2/Cdt1/Tom1l1/Phip/Calr/Edn1/Chmp4b/Phb2/Klhl22/Chmp4c/Rps6ka2/Ranbp1/Tgfa/Pde3a/Tnks/Piwil2/Igf1r	37
GO:0071216	cellular response to biotic stimulus	51/1817	311/23174	3.88945e-07	1.30437e-05	9.17061e-06	Cxcl1/Nlrp3/Lyn/Cxcl2/Il1b/Zfp36/Zc3h12a/Acod1/Serpine1/Cxcl15/Cxcl5/Cd80/Pdcd4/Tnf/Nfkbia/Ankrd1/Ppbp/Ccl2/Tnfaip3/Tnip3/Tgfb1/Il1rn/Pf4/Cxcl3/Ogt/Sbno2/Bid/Il6/Myd88/Cebpb/Pde4b/Cd300lb/Vim/Pde2a/Nod2/Trp53/Cmpk2/Selenos/Trib1/Nfkbib/Tnfrsf1b/Slx4/Nos3/Cd68/Mif/Cactin/Cd36/Cd84/Ccl12/Plscr4/Fcgr2b	51
GO:0071407	cellular response to organic cyclic compound	70/1817	482/23174	3.9126e-07	1.30717e-05	9.19025e-06	Zfp703/Pgr/Esr1/Il1b/Tiparp/Zfp36/Sgk1/Zc3h12a/Actb/Acod1/Ncoa3/Inhba/Nr4a3/Cyp7b1/Bdnf/Impact/Tnf/Nfkbia/Cyp1b1/Tmem173/Rora/Itpr1/Itpr2/Tgfb1/Ncor1/Atf4/Ntrk2/Vdr/Padi2/Pim1/Ddit4/Trpm2/Pde4b/Anxa1/Msn/Eif4e/Pdgfb/Fam107a/Sfrp1/Pde2a/Lrp6/Ddx5/Adipoq/Kcnq1/Pparg/Pde12/Zfp36l1/Arpc2/Adcy6/Ptch1/Cry2/Cdkn1b/Cdh1/Tmem38b/Calr/Nr3c1/Phb2/Id3/Igfbp5/Rap1b/P2rx7/Ccl12/Ranbp1/Arrb2/Crebrf/Tlr3/Pde3a/R…	70
GO:0072330	monocarboxylic acid biosynthetic process	45/1817	260/23174	3.96043e-07	1.31445e-05	9.24147e-06	Ptgs2/Il1b/Elovl7/Ptges/Hif1a/Ier3/Mgll/Sphk1/Fads2/Cyp7b1/Fads1/Myc/Dhrs9/Lpl/Prxl2c/Pnpla8/Ncor1/Ogt/Prkaa2/Ddit4/Eif6/Anxa1/Hacd1/Trp53/Aldoc/Zbtb20/Prox1/Pgam1/Hk3/Per2/Edn1/Adpgk/Mif/Cyp27a1/Eno2/Pfkfb2/Fabp5/Plp1/Lipg/P2rx7/Srr/Foxk1/Trib3/Asah2/Rdh10	45
GO:0009896	positive regulation of catabolic process	63/1817	418/23174	4.02457e-07	1.32449e-05	9.31203e-06	Ptpn1/Sesn3/Il1b/Tiparp/Hif1a/Zfp36/Zc3h12a/Ier3/Plk3/Fbxo7/Tnf/Dapk1/Myc/Nedd4/Adam8/Trim8/Tmem173/Rnf19b/Pten/Amer1/Tnfaip3/Mefv/Prxl2c/Hmox1/Plk2/Ecscr/Cul4b/Sox9/Ldlr/Bid/Il6/Map2k1/Prkaa2/Fbxl5/Vps13d/Gja1/Mylip/Lrp1/Msn/Nod2/Snx33/Ppp2r3a/Acsl5/Zbtb20/Tnrc6c/Zfand2a/Trib1/Zfp36l1/Tnfrsf1b/Nkd2/Adra2a/Sgta/Nsf/Mif/Tnrc6b/Fyco1/Trim30a/Bag3/Cblb/P2rx7/Crebrf/Trib3/Stub1	63
GO:0045446	endothelial cell differentiation	25/1817	106/23174	4.87576e-07	1.5525e-05	1.09151e-05	Il1b/Anxa2/Afdn/Id1/Myadm/Tnf/Btg1/Pdpn/Apold1/Stc1/Icam1/Cldn1/Myd88/Cxcr4/Msn/Tjp1/Prok2/Pde2a/Acvr1/Col18a1/Prox1/Clic4/Rap1b/Foxj2/Cldn5	25
GO:0016032	viral process	47/1817	279/23174	4.97295e-07	1.57775e-05	1.10926e-05	Anxa2/Zfp36/Zc3h12a/Ctsb/Ifitm2/Pfn1/Ptx3/Pcsk5/Cfl1/Ifitm1/Tnf/Myc/Trim8/Ifitm6/Tgfb1/Ccl4/Mmp9/Zfp72/P4hb/Isg15/Oas3/Icam1/Ddx6/Cxcr4/Ifitm3/Ppib/Eif3b/Slc20a2/Ripk3/Kpna2/Trp53/Trim28/Ccr5/Rnasel/Ddx5/Trim15/Rrp1b/Prox1/Pde12/Lgals1/Trim6/Chmp4b/Oasl1/Pcbp1/Trim30a/Chmp4c/Banf1	47
GO:0019439	aromatic compound catabolic process	69/1817	476/23174	5.06942e-07	1.60259e-05	1.12673e-05	Dio3/Hdc/Hif1a/Zfp36/Zc3h12a/Ier3/Nt5e/Slc11a1/Noct/Dio2/Cidea/Myc/Tet1/Prxl2c/Hmox1/Ephx2/Hal/Ncor1/Oas2/Ada/Ogt/Il6/Upp1/Myd88/Prkaa2/Ddit4/Eif6/Polr2d/Blvra/Vim/Pop1/Pde2a/Aox1/Trp53/Mrto4/Ugt1a7c/Nudt7/Rnasel/Ddx5/Ncf2/Aldoc/Zbtb20/Ephx1/Tnrc6c/Pde12/Pgam1/Entpd1/Zfp36l1/Hk3/Tnfrsf1b/Tbrg4/Eif4a3/Apex1/Naf1/Aox3/Adpgk/Mif/Tnrc6b/Exosc2/Eno2/Pfkfb2/Samhd1/Pnrc2/P2rx7/Foxk1/Ybx1/Nudt12/Entpd7/H…	69
GO:0001781	neutrophil apoptotic process	8/1817	12/23174	5.22955e-07	1.64731e-05	1.15817e-05	Slc7a11/Cxcr2/Pik3cb/Hcar2/Il6/Anxa1/Cd44/Fcgr2b	8
GO:0046434	organophosphate catabolic process	38/1817	205/23174	5.40608e-07	1.69084e-05	1.18877e-05	Hif1a/Ier3/Nt5e/Myc/Enpp2/Pten/Prxl2c/Smpd3/Pnpla8/Ncor1/Ada/Ogt/Ldlr/Upp1/Prkaa2/Ddit4/Eif6/Pde2a/Trp53/Nudt7/Ncf2/Plcg1/Aldoc/Zbtb20/Inpp4b/Pgam1/Entpd1/Hk3/Adpgk/Mif/Eno2/Pfkfb2/Samhd1/P2rx7/Foxk1/Nudt12/Entpd7/Hint1	38
GO:0062013	positive regulation of small molecule metabolic process	31/1817	151/23174	6.05068e-07	1.87253e-05	1.31651e-05	Ptgs2/Il1b/Hif1a/Nr4a3/Tcf7l2/Tnf/Myc/Cd244a/Prxl2c/Has2/Kat2a/Adora2b/Pid1/Adcyap1r1/Map2k1/Prkaa2/Anxa1/Pdgfb/Adipoq/Acsl5/Zbtb20/Pparg/Nucb2/Nos3/Dyrk2/Mif/Epm2aip1/P2rx7/Sec14l2/Rdh10/Ptafr	31
GO:0090257	regulation of muscle system process	42/1817	239/23174	6.28218e-07	1.93062e-05	1.35736e-05	Ptgs2/Dbn1/Zc3h12a/Sphk1/Nr4a3/Ece1/Ehd3/Arg2/Errfi1/Ccn4/Ada/Stc1/Gja5/Adora2b/Map2k1/Pde4b/Srf/Itga2/Prok2/Scn5a/Gucy1a1/Ccn2/Kcnq1/Kcnj2/Tnfrsf1b/Dsp/Tnni2/Adra2a/G6pdx/Ddx39b/Tmem38b/Nr3c1/Edn1/Nos3/Cald1/Igfbp5/Arhgap42/Kit/Lmna/Cmya5/Ptafr/Atp1a2	42
GO:0070838	divalent metal ion transport	68/1817	473/23174	8.28925e-07	2.44519e-05	1.71913e-05	Lyn/Ptgs2/Anxa2/Ramp1/Homer2/Serpine1/Slc11a1/Ccr1/Ngf/Marcksl1/Ero1l/Plce1/Itpr1/Ehd3/Itpr2/Pkd1/Tgfb1/Ccl4/Gnai2/Cacnb4/Slc39a1/Stc1/Kcnn4/Vdr/Icam1/Adcyap1r1/Slc25a25/Nipal1/Nipal4/Cxcr4/Gja1/Trpm2/Pde4b/Hes1/Pdgfb/Pik3c2a/Ccr5/Cacnb1/Slc11a2/Dbi/Plcg1/Ccn2/Tpcn2/Kcnj2/Rem2/Mcoln2/G6pdx/Tmem38b/Atp2b2/Nos3/Opa1/Trpv4/Lgals3/Myb/Nipa2/P2rx7/Cbarp/Atp2c1/Gpr39/Gpr35/Cd84/Ccl12/Cacnb3/Arrb2/Ubash…	68
GO:0097237	cellular response to toxic substance	33/1817	169/23174	8.83514e-07	2.57811e-05	1.81258e-05	Zc3h12a/Actb/Sphk1/Nr4a3/Fbxo7/Timeless/Cfl1/Impact/Tnf/Sod2/Abcg2/Cyp1b1/Pten/Kcnc2/Tnfaip3/Itpr2/Hmox1/Smpd3/Rdh12/Slc31a1/Il6/Trpm2/Anxa1/Pdgfb/Ripk3/Ppif/Trp53/Ppp1r9a/Hk3/Sigmar1/Apex1/Nos3/Cd36	33
GO:0030193	regulation of blood coagulation	20/1817	77/23174	1.32249e-06	3.5562e-05	2.50025e-05	Lyn/S100a9/Anxa2/Serpine1/Pdgfra/Pdpn/Fcer1g/Pdgfa/Plek/Selp/Pdgfb/Thbs1/Tspan8/C1qtnf1/Prkcq/Tpsab1/Serpine2/Thbd/Cd36/Ubash3b	20
GO:0043281	regulation of cysteine-type endopeptidase activity involved in apoptotic process	36/1817	196/23174	1.33338e-06	3.5746e-05	2.51318e-05	S100a8/Nlrp3/Ret/Ptgs2/S100a9/Ngfr/Plaur/Nlrp12/Tnf/Dapk1/Casp4/Myc/Sfn/Nle1/Mmp9/Ccn1/Il24/Nr4a1/Bid/Il6/Naip2/Hip1/Birc3/Cd44/Slc11a2/Thbs1/Ccn2/Arl6ip5/Pparg/Pmaip1/Cdh1/Cradd/Dhcr24/Rps6ka3/Arrb2/Dlc1	36
GO:1901615	organic hydroxy compound metabolic process	67/1817	471/23174	1.45379e-06	3.84744e-05	2.70501e-05	Isyna1/Dio3/Ch25h/Plcl1/Hdc/Il1b/Snai1/Hif1a/Soat2/Slc7a11/Sphk1/Cyp7b1/Cyp4f18/Tnf/Dio2/Cyp1b1/Pten/Plce1/Cd244a/Slco4a1/Thrb/Rdh12/Ephx2/Vdr/Ldlr/Adcyap1r1/Ttc39b/Prkaa2/Plek/Lrp1/Atp8b1/Nr4a2/Sord/Trp53/Dhrs3/Hmgcr/Pde1b/Plcg1/Ephx1/Prox1/Ces1d/Inpp4b/Plpp1/Msmo1/Hsd3b7/G6pdx/Retsat/Fdft1/Per2/Soat1/Atp2b2/Cyp27a1/Vldlr/Dhcr24/Hmgcs2/Cited1/Pfkfb2/Gcnt4/Duoxa1/Ldlrap1/Kit/Asah2/Sec14l2/Rdh10/P…	67
GO:0055074	calcium ion homeostasis	69/1817	490/23174	1.47111e-06	3.86168e-05	2.71502e-05	Cxcl1/Tgm2/Lyn/C5ar2/Esr1/Cxcl2/Il1b/Cmklr1/Fpr2/Fpr1/Fam20a/Lpar1/Pdgfra/Ccr1/C5ar1/Ngf/Atp13a4/Cxcr2/Marcksl1/Ero1l/Pik3cb/Plce1/Itpr1/Ccl2/Ccl3/Itpr2/Pkd1/Tgfb1/Smpd3/Cxcl3/Cacnb4/Ccrl2/Stc1/Atf4/Vdr/Adcyap1r1/Cxcr4/Gja1/Trpm2/Eif5a/Lrp1/Lrp6/Ccr5/Scn5a/Dbi/Plcg1/Tpcn2/Inpp4b/C1qtnf1/Ccr6/Nucb2/Ptgir/Tmem38b/Atp2b2/Edn1/Atp13a1/Adm/Trpv4/P2rx7/Atp2c1/Cd36/Gpr39/Gpr35/Cacnb3/Lpar6/Ubash3b/Ackr2…	69
GO:0046700	heterocycle catabolic process	66/1817	462/23174	1.49646e-06	3.91416e-05	2.75192e-05	Hdc/Hif1a/Zfp36/Zc3h12a/Ier3/Nt5e/Slc11a1/Noct/Cidea/Myc/Tet1/Prxl2c/Hmox1/Hal/Ncor1/Oas2/Ada/Ogt/Il6/Upp1/Myd88/Prkaa2/Ddit4/Eif6/Polr2d/Blvra/Vim/Pop1/Pde2a/Aox1/Trp53/Mrto4/Ugt1a7c/Nudt7/Rnasel/Ddx5/Ncf2/Aldoc/Zbtb20/Tnrc6c/Aldh6a1/Pde12/Pgam1/Entpd1/Zfp36l1/Hk3/Tnfrsf1b/Tbrg4/Eif4a3/Apex1/Naf1/Aox3/Adpgk/Mif/Tnrc6b/Exosc2/Eno2/Pfkfb2/Samhd1/Pnrc2/P2rx7/Foxk1/Ybx1/Nudt12/Entpd7/Hint1	66
GO:1900046	regulation of hemostasis	20/1817	78/23174	1.64842e-06	4.22646e-05	2.97149e-05	Lyn/S100a9/Anxa2/Serpine1/Pdgfra/Pdpn/Fcer1g/Pdgfa/Plek/Selp/Pdgfb/Thbs1/Tspan8/C1qtnf1/Prkcq/Tpsab1/Serpine2/Thbd/Cd36/Ubash3b	20
GO:0006874	cellular calcium ion homeostasis	67/1817	474/23174	1.81993e-06	4.54972e-05	3.19876e-05	Cxcl1/Tgm2/Lyn/C5ar2/Esr1/Cxcl2/Il1b/Cmklr1/Fpr2/Fpr1/Lpar1/Pdgfra/Ccr1/C5ar1/Ngf/Atp13a4/Cxcr2/Marcksl1/Ero1l/Pik3cb/Plce1/Itpr1/Ccl2/Ccl3/Itpr2/Pkd1/Tgfb1/Smpd3/Cxcl3/Cacnb4/Ccrl2/Stc1/Atf4/Vdr/Adcyap1r1/Cxcr4/Gja1/Trpm2/Eif5a/Lrp1/Lrp6/Ccr5/Dbi/Plcg1/Tpcn2/Inpp4b/C1qtnf1/Ccr6/Nucb2/Ptgir/Tmem38b/Atp2b2/Edn1/Atp13a1/Adm/Trpv4/P2rx7/Atp2c1/Cd36/Gpr39/Gpr35/Cacnb3/Lpar6/Ubash3b/Ackr2/Atp13a3/Atp1…	67
GO:0044270	cellular nitrogen compound catabolic process	65/1817	456/23174	1.93369e-06	4.80426e-05	3.37771e-05	Hdc/Hif1a/Zfp36/Zc3h12a/Ier3/Nt5e/Slc11a1/Noct/Cidea/Myc/Tet1/Prxl2c/Hmox1/Hal/Ncor1/Oas2/Ada/Ogt/Il6/Upp1/Myd88/Prkaa2/Ddit4/Eif6/Polr2d/Blvra/Vim/Pop1/Pde2a/Aox1/Trp53/Mrto4/Nudt7/Rnasel/Ddx5/Ncf2/Aldoc/Zbtb20/Tnrc6c/Aldh6a1/Pde12/Pgam1/Entpd1/Zfp36l1/Hk3/Tnfrsf1b/Tbrg4/Eif4a3/Apex1/Naf1/Aox3/Adpgk/Mif/Tnrc6b/Exosc2/Eno2/Pfkfb2/Samhd1/Pnrc2/P2rx7/Foxk1/Ybx1/Nudt12/Entpd7/Hint1	65
GO:0006110	regulation of glycolytic process	14/1817	42/23174	2.04657e-06	5.05622e-05	3.55487e-05	Hif1a/Ier3/Myc/Prxl2c/Ncor1/Ogt/Prkaa2/Ddit4/Eif6/Trp53/Zbtb20/Pgam1/Mif/P2rx7	14
GO:0071559	response to transforming growth factor beta	37/1817	208/23174	2.1213e-06	5.22622e-05	3.67439e-05	Zfp703/Itga8/Gcnt2/Dbn1/Serpine1/Ankrd1/Cidea/Ccl2/Rasl11b/Emilin1/Tgfb1/Sox6/Fos/Fut8/Sox9/Vasn/Glg1/Adam17/Yes1/Trp53/Acvr1/Fbn2/Col4a2/Thbs1/Appl2/Pmepa1/Ltbp3/Fermt1/Zfp36l1/Nr3c1/Nos3/Cited1/Nrros/Arrb2/Stub1/Cldn5/Igf1r	37
GO:0072594	establishment of protein localization to organelle	56/1817	374/23174	2.14525e-06	5.25586e-05	3.69522e-05	Ptpn5/Ptgs2/Zc3h12a/Vps13a/Fbxo7/Hspa4/Cfl1/Nfkbia/Nedd4/Ssr3/Pik3r1/Tnfaip3/Nup93/Tgfb1/Timm13/Tomm40/Spcs3/Chp2/Bid/Ywhaz/Vps13d/Kpna2/Trp53/Trim28/Sec61b/Rab8b/Ddx5/Pom121/Appl2/Cct3/Scarb2/Fermt1/Rasl2-9/Pmaip1/Pik3r4/Nipbl/Cry2/Gcc2/Ran/Cdh1/Phip/Nutf2/Sgta/Chmp4b/Phb2/Cd68/Prkcq/Bag3/Pkia/Timm23/Srp9/Cd36/Angpt1/Cox18/Nxt1/Lmna	56
GO:0034341	response to interferon-gamma	28/1817	137/23174	2.28506e-06	5.51051e-05	3.87426e-05	Acod1/Ifitm2/Slc11a1/Ccl11/Ifitm1/Dapk1/Rab20/Ifitm6/Cdc42ep2/Ccl2/Ccl3/Ccl9/Mefv/Ccl4/Ccl6/Stx11/Ifitm3/Myo18a/Vim/Actg1/Trp53/Pparg/Pde12/Gbp3/Hpx/Cited1/Ccl12/Rab11fip5	28
GO:1905952	regulation of lipid localization	29/1817	145/23174	2.40524e-06	5.74793e-05	4.04118e-05	Il1b/Anxa2/Zc3h12a/Cyp4f18/Msr1/Ehd1/Nfkbia/Cidea/Lpl/Ncor1/Ttc39b/Lrp1/Ikbke/Hilpda/Thbs1/Adipoq/Acsl5/Pparg/C1qtnf1/Nucb2/Tnfrsf11a/Ptch1/Cry2/Edn1/Mif/Lipg/P2rx7/Ldlrap1/Cd36	29
GO:0071402	cellular response to lipoprotein particle stimulus	11/1817	27/23174	2.67786e-06	6.23186e-05	4.38142e-05	Lpl/Fcer1g/Smpd3/Ldlr/Myd88/Mylip/Adam17/Pparg/Cd68/Cd36/Itgb2	11
GO:0002532	production of molecular mediator involved in inflammatory response	19/1817	74/23174	2.9166e-06	6.63632e-05	4.66578e-05	Il4ra/Il1r2/Lyn/Zc3h12a/Il17ra/Serpine1/Alox5ap/Pdcd4/Mefv/Fcer1g/Ephx2/Ywhaz/Myd88/Adam17/Nod2/Appl2/Dusp10/Tarm1/Alox5	19
GO:0050818	regulation of coagulation	20/1817	81/23174	3.1118e-06	7.03746e-05	4.94781e-05	Lyn/S100a9/Anxa2/Serpine1/Pdgfra/Pdpn/Fcer1g/Pdgfa/Plek/Selp/Pdgfb/Thbs1/Tspan8/C1qtnf1/Prkcq/Tpsab1/Serpine2/Thbd/Cd36/Ubash3b	20
GO:0045926	negative regulation of growth	45/1817	280/23174	3.20162e-06	7.21458e-05	5.07234e-05	Socs2/Sema4a/Hif1a/Inhba/Mndal/Tcf7l2/Cfl1/Tnf/Kcnk2/Lgmn/Spg20/Pten/Tgfb1/Sema6b/Tnr/Sertad1/Sema7a/Myd88/Gdf15/Gja1/Plac8/Sfrp1/Dcbld2/Nod2/Bcl11a/Trp53/Sema4c/Ccr5/Adam15/P3h1/Smarca2/Pparg/Ifrd1/Ptch1/Cdkn1b/Dusp10/G6pdx/Sema3f/Slit2/Sema4d/Igfbp5/Serpine2/Sema6c/Cd36/Ulk2	45
GO:0042133	neurotransmitter metabolic process	29/1817	147/23174	3.20648e-06	7.21458e-05	5.07234e-05	Hdc/Esr1/Ptgs2/Il1b/Mmp8/Zc3h12a/Ptx3/Tnf/Sod2/Cyp1b1/Rora/Smpd3/Ddah1/Icam1/Il6/Tmem106a/Gla/Klf2/Rac1/Pde1b/Aldh6a1/Selenos/Dynll1/Atp2b2/Nos3/Aasdh/Cd36/Itgb2/Tha1	29
GO:1990845	adaptive thermogenesis	30/1817	155/23174	3.29189e-06	7.38398e-05	5.19144e-05	Il4ra/Rb1/Plcl1/Cmklr1/Adamts5/Id1/Acsl1/Dio2/Cidea/Lgr4/Ogt/Atf4/Pgam5/Cxcr4/Cebpb/Gja1/Plac8/Adam17/Adipoq/Appl2/Pparg/Per2/Gadd45g/Ucp3/Trpv4/Fabp5/Dync1h1/Cd36/Gpr39/Igf1r	30
GO:0032970	regulation of actin filament-based process	57/1817	390/23174	3.75429e-06	8.31981e-05	5.84938e-05	Dbn1/Rhou/Csf3/S100a10/Pfn1/Capzb/Id1/Lpar1/Rhog/Ccl11/Cfl1/Myadm/Bst1/Pdpn/Cd2ap/Cdc42ep2/Pik3r1/Rnd1/Tgfb1/Abracl/Stc1/Gja5/Icam1/Eps8/Limch1/Plek/Trpm2/Pde4b/Sdc4/Arhgdia/Sptbn1/Lrp1/Sh3pxd2b/Fam107a/Fgr/Tacstd2/Arpc1b/Rac1/Vasp/Scn5a/Ccn2/Prox1/Gm14137/Fhod3/Arpc2/Kcnj2/Ppp1r9a/Dsp/Edn1/Slit2/Arhgap35/Limk1/Prkcq/Ilk/Dlc1/Arfgef1/Atp1a2	57
GO:0007596	blood coagulation	30/1817	156/23174	3.77409e-06	8.34273e-05	5.8655e-05	Lyn/F10/S100a9/Anxa2/Slc7a11/Serpine1/Pdgfra/Rap2b/Pdpn/Pik3cb/Fcer1g/Pf4/F5/F13a1/Pdgfa/Plek/Selp/Srf/F8/Pdgfb/Thbs1/Tspan8/C1qtnf1/Entpd1/Prkcq/Tpsab1/Serpine2/Thbd/Cd36/Ubash3b	30
GO:0002718	regulation of cytokine production involved in immune response	20/1817	82/23174	3.81484e-06	8.36987e-05	5.88458e-05	Nlrp3/Il1b/Il1r1/Nr4a3/Tnf/Tgfb1/Fcer1g/Hmox1/Sema7a/Il6/Tril/Nod2/Tnfrsf1b/Ddx21/Trim6/Mif/Gprc5b/Cd36/Angpt1/Tlr3	20
GO:1905517	macrophage migration	16/1817	56/23174	3.88461e-06	8.47289e-05	5.95701e-05	Cd200/Csf1/Cmklr1/C5ar1/Ccl2/Ccl3/Emilin1/Mtus1/Cd200r1/Thbs1/Mcoln2/Mif/Trpv4/Lgals3/Gpr35/Ccl12	16
GO:0071496	cellular response to external stimulus	45/1817	285/23174	5.16583e-06	0.000109525	7.70038e-05	Sesn3/Slc2a1/Zc3h12a/Slc38a3/Tcf7l2/Impact/Fads1/Bmf/Ankrd1/Itga6/Lpl/Gabarapl1/Mmp9/Mybbp1a/Fos/Atf4/Sox9/Vdr/Adora2b/Prkaa2/Rragd/Pim1/Rrp8/Arhgdia/Srf/Fosl1/Ppan/Nr4a2/Fam107a/Pik3c2a/Pde2a/Trp53/Rac1/Ncoa1/Pik3r4/Cadps2/Pik3c2b/Cradd/Nos3/Cd68/Arhgap35/Atg14/Bag3/P2rx7/Atp1a2	45
GO:0045862	positive regulation of proteolysis	49/1817	321/23174	5.28966e-06	0.000111083	7.80987e-05	Spon1/S100a8/Nlrp3/Ret/Lyn/Il1b/S100a9/Zc3h12a/Plk3/Ngfr/Cfl1/Tnf/Dapk1/Lgmn/Casp4/Myc/Adam8/Rnf19b/Pten/Picalm/Mefv/Plk2/Ogt/Ecscr/Psme3/Ccn1/Il24/Bid/Tnip1/Hip1/Snx33/Slc11a2/Ccn2/Arl6ip5/Pparg/Zfand2a/Trib1/Pmaip1/Tnfrsf1b/Nkd2/Adra2a/Sgta/Cradd/Tbc1d10a/Mbp/Ruvbl1/Trib3/Stub1/Dlc1	49
GO:0006606	protein import into nucleus	29/1817	151/23174	5.5881e-06	0.000116518	8.19199e-05	Ptgs2/Zc3h12a/Cfl1/Nfkbia/Pik3r1/Nup93/Tgfb1/Chp2/Kpna2/Trp53/Trim28/Ddx5/Pom121/Appl2/Fermt1/Rasl2-9/Cry2/Ran/Cdh1/Phip/Nutf2/Phb2/Prkcq/Bag3/Pkia/Cd36/Angpt1/Nxt1/Lmna	29
GO:0050863	regulation of T cell activation	47/1817	304/23174	5.76823e-06	0.000119427	8.3965e-05	Il4ra/Nlrp3/Sftpd/Il1b/Zc3h12a/Cd80/Il6ra/Adam8/Il23a/Cd244a/Ccl2/Arg2/Dock8/Ephb6/Pla2g2d/Tgfb1/Ada/Kat2a/Cd209e/Il6/Foxj1/Cebpb/Skint2/Slfn1/Sdc4/Anxa1/Cd44/Hes1/Nfkbid/Ripk3/Nrarp/Tnfrsf1b/Dusp10/Lgals1/Tarm1/Mapk8ip1/Gpam/Prkcq/Lgals3/Myb/Ephb4/Cblb/Cbfb/Fgl2/Rorc/Shb/Vtcn1	47
GO:0032388	positive regulation of intracellular transport	35/1817	201/23174	6.46462e-06	0.000130775	9.19437e-05	Il4ra/Ptpn5/Ptgs2/Anxa2/Zc3h12a/Plk3/Syt9/Tcf7l2/Ehd1/Pik3r1/Ccl2/Sfn/Tgfb1/Fcer1g/Numa1/Adora2b/Chp2/Msn/Fgr/Trim28/Arpc2/Tcaf1/Ran/Cdh1/Nutf2/Chrm1/Prkcq/Khdrbs1/Bag3/Dync1h1/Ldlrap1/Ptpn23/Cacnb3/Crebrf/Kif3a	35
GO:0061614	pri-miRNA transcription by RNA polymerase II	15/1817	52/23174	6.81159e-06	0.000136232	9.57802e-05	Hif1a/Ngfr/Nfib/Tgfb1/Fos/Sox9/Gnl3/Srf/Fosl1/Pdgfb/Trp53/Ddx5/Spi1/Pparg/Nr3c1	15
GO:0034504	protein localization to nucleus	43/1817	271/23174	7.30673e-06	0.000143851	0.000101137	Ptgs2/Zc3h12a/Lif/Ngfr/Cfl1/Nfkbia/Cd2ap/Trim8/Pik3r1/Nup93/Tgfb1/Cacnb4/Ogt/Sox9/Chp2/Syne2/Kpna2/Trp53/Trim28/Ddx5/Pom121/Appl2/Fermt1/Rasl2-9/Rangap1/Cry2/Ran/Cdh1/Phip/Nutf2/Calr/Phb2/Glis2/Taf8/Prkcq/Bag3/Pkia/Rpf2/Cd36/Angpt1/Rrs1/Nxt1/Lmna	43
GO:0007015	actin filament organization	57/1817	400/23174	8.18273e-06	0.000158271	0.000111275	Dbn1/Rhou/Csf3/S100a10/Pfn1/Capzb/Id1/Lpar1/Rhog/Ccl11/Pof1b/Cfl1/Myadm/Cd2ap/Coro1c/Casp4/Cdc42ep2/Pik3r1/Arhgap12/Rnd1/Tpm4/Actn1/Pstpip1/Icam1/Myo1b/Eps8/Limch1/Plek/Sdc4/Sptbn1/Srf/Hip1/Sh3pxd2b/Cass4/Fam107a/Tacstd2/Arpc1b/Rac1/Vasp/Tpm2/Shroom4/Ccn2/Prox1/Gm14137/Fhod3/Arpc2/Ppp1r9a/Slit2/Arhgap35/Limk1/Trpv4/Prkcq/Cald1/Bcar1/Cap1/Dlc1/Arfgef1	57
GO:0032943	mononuclear cell proliferation	47/1817	309/23174	8.98552e-06	0.000171542	0.000120605	Itgam/Lyn/Csf1/Sftpd/Il1b/Slc11a1/Cd80/Bst1/Ctps/Il6ra/Il23a/Cd244a/Arg2/Dock8/Ephb6/Pla2g2d/Tgfb1/Ada/Cd209e/Il6/Myd88/Foxj1/Cxcr4/Cebpb/Gja1/Slfn1/Sdc4/Anxa1/Msn/Cd44/Hes1/Satb1/Ripk3/Trp53/Tnfrsf1b/Tarm1/Mapk8ip1/Mif/Gpam/Prkcq/Lgals3/Cblb/P2rx7/Itgb2/Fcgr2b/Shb/Vtcn1	47
GO:0055094	response to lipoprotein particle	10/1817	25/23174	9.35385e-06	0.000177421	0.000124739	Lpl/Fcer1g/Smpd3/Ldlr/Myd88/Mylip/Pparg/Cd68/Cd36/Itgb2	10
GO:0048144	fibroblast proliferation	23/1817	109/23174	1.02565e-05	0.000192473	0.000135321	Kmt2c/Esr1/Anxa2/Serpine1/Sphk1/Ngfr/Pdgfra/Sod2/Myc/Ereg/Tgfb1/Mmp9/Pdgfa/Fosl2/Pdgfb/Sfrp1/Trp53/Tgif1/Pparg/Pmaip1/B4galt7/Dach1/Mif	23
GO:0051235	maintenance of location	48/1817	320/23174	1.06039e-05	0.00019857	0.000139608	Clmn/Lyn/Il1b/Dbn1/Zc3h12a/Vps13a/Pfn1/Ngf/Msr1/Tnf/Ehd1/Ero1l/Nfkbia/Cidea/Plce1/Itpr1/Itpr2/Pkd1/Tgfb1/Lpl/Srgn/Kdelr3/Ttc39b/Vps13d/Trpm2/Ikbke/Hilpda/Syne2/Fbn2/Ccr5/Dbi/Plcg1/Pparg/Tpcn2/Rangap1/Adcy6/Nfkbib/Cry2/Tmem38b/Soat1/Kdelr2/Taf8/Nrros/P2rx7/Cd36/Gpr39/Ubash3b/Dysf	48
GO:0006898	receptor-mediated endocytosis	37/1817	223/23174	1.1173e-05	0.000207902	0.000146169	Ptpn5/Anxa2/Fpr2/Ramp1/Serpine1/Msr1/Cxcr2/Cd2ap/Nedd4/Dnm3/Picalm/Sele/Fcer1g/Ldlr/Lrp1/Hip1/Ifitm3/Lrp6/Fcgr1/Cd63/Scarb2/Timd2/Hspg2/Adm/Nsf/Ophn1/Vldlr/Ankrd13d/Ldlrap1/Reps1/Cd36/Angpt1/Arrb2/Cap1/Kif3a/Itgb2/Fcgr2b	37
GO:0048545	response to steroid hormone	36/1817	216/23174	1.31838e-05	0.000237794	0.000167185	Pgr/Esr1/Zfp36/Sgk1/Areg/Acod1/Ncoa3/Cyp7b1/Bdnf/Tnf/Pik3r1/Tgfb1/Il1rn/Ncor1/Ntrk2/Padi2/Il6/Map2k1/Ddit4/Fibin/Anxa1/Eif4e/Fam107a/Sfrp1/Tbl1x/Ddx5/Ncoa1/Zfp36l1/Cry2/Calr/Nr3c1/Phb2/Arrb2/Crebrf/Trip4/Atp1a2	36
GO:0045732	positive regulation of protein catabolic process	35/1817	208/23174	1.39767e-05	0.000251581	0.000176878	Il1b/Tiparp/Ier3/Plk3/Tnf/Nedd4/Adam8/Rnf19b/Pten/Amer1/Tnfaip3/Plk2/Ecscr/Cul4b/Sox9/Ldlr/Fbxl5/Gja1/Mylip/Lrp1/Msn/Snx33/Ppp2r3a/Zfand2a/Trib1/Tnfrsf1b/Nkd2/Adra2a/Sgta/Nsf/Trim30a/Cblb/Crebrf/Trib3/Stub1	35
GO:0031331	positive regulation of cellular catabolic process	51/1817	351/23174	1.4033e-05	0.00025208	0.000177229	Ptpn1/Sesn3/Il1b/Hif1a/Zfp36/Zc3h12a/Plk3/Fbxo7/Tnf/Dapk1/Myc/Adam8/Trim8/Tmem173/Rnf19b/Pten/Amer1/Tnfaip3/Mefv/Prxl2c/Hmox1/Plk2/Ecscr/Ldlr/Bid/Il6/Map2k1/Prkaa2/Fbxl5/Vps13d/Lrp1/Msn/Nod2/Snx33/Acsl5/Zbtb20/Tnrc6c/Zfand2a/Trib1/Zfp36l1/Tnfrsf1b/Nkd2/Adra2a/Sgta/Mif/Tnrc6b/Fyco1/Bag3/P2rx7/Trib3/Stub1	51
GO:0120192	tight junction assembly	13/1817	43/23174	1.58594e-05	0.000278091	0.000195517	Snai1/Afdn/Epha2/Cgn/Pof1b/Tnf/Mpp7/Cldn1/Gja1/Srf/Nphp4/Cdh1/Mpp5	13
GO:0043112	receptor metabolic process	34/1817	201/23174	1.64446e-05	0.000286642	0.000201529	Ptpn1/Ptpn5/Anxa2/Hif1a/Ramp1/Cxcr2/Tnf/Ece1/Lgmn/Nedd4/Dnm3/Ehd3/Picalm/Sele/Tgfb1/Fcer1g/Nrg1/Fut8/Mylip/Gprasp1/Cd63/Adipoq/Pparg/Pik3r4/Edn1/Adm/Nsf/Ophn1/Ankrd13d/Ldlrap1/Cd36/Angpt1/Arrb2/Itgb2	34
GO:0043299	leukocyte degranulation	17/1817	69/23174	1.73225e-05	0.000298991	0.000210211	Il4ra/Itgam/Lyn/Nr4a3/Fcer1g/Hmox1/Adora2b/Ywhaz/Stx11/Fgr/Cd177/Pi4k2a/Lat2/Cd84/Kit/Itgb2/Ptafr	17
GO:1902903	regulation of supramolecular fiber organization	50/1817	345/23174	1.81839e-05	0.000310818	0.000218526	Rb1/Dbn1/Sgk1/Csf3/S100a10/Pfn1/Capzb/Id1/Lpar1/Ccl11/Cfl1/Myadm/Cdc42ep2/Pik3r1/Emilin1/Numa1/Pde4dip/Icam1/Ldlr/Eps8/Limch1/Plek/Sdc4/Sptbn1/Sh3pxd2b/Tacstd2/Arpc1b/Rac1/Vasp/Map1b/Ccn2/Prox1/Gm14137/Fhod3/Arpc2/Ttbk2/Ppp1r9a/Cdkn1b/Cdk5rap2/Mapre1/Edn1/Slit2/Arhgap35/Limk1/Trpv4/Prkcq/Map1a/Dlc1/Dysf/Arfgef1	50
GO:0006066	alcohol metabolic process	46/1817	310/23174	2.12126e-05	0.000354347	0.00024913	Isyna1/Ch25h/Plcl1/Il1b/Soat2/Sphk1/Cyp7b1/Tnf/Cyp1b1/Pten/Plce1/Cd244a/Thrb/Rdh12/Ephx2/Vdr/Ldlr/Adcyap1r1/Ttc39b/Prkaa2/Plek/Lrp1/Sord/Dhrs3/Hmgcr/Plcg1/Ephx1/Ces1d/Inpp4b/Plpp1/Hsd3b7/G6pdx/Retsat/Fdft1/Soat1/Cyp27a1/Vldlr/Dhcr24/Hmgcs2/Ldlrap1/Asah2/Sec14l2/Rdh10/Ptafr/Dysf/Slc5a3	46
GO:0050807	regulation of synapse organization	41/1817	265/23174	2.17656e-05	0.000360174	0.000253227	Adgre5/Sema4a/Thbs2/Dbn1/Cdkl5/Slc7a11/Afdn/Tuba1a/Bdnf/Cfl1/Slitrk4/Tnf/Srcin1/Nedd4/Dnm3/Pten/Picalm/Srgn/Ntrk2/Egln1/Ywhaz/Nptxr/Tpbg/Nptx1/Amigo3/Tubb5/Mfn1/Ppp1r9a/Fzd1/Ptprf/Sema3f/Chmp4b/Opa1/Arf4/Sema4d/Nlgn2/Lrp4/Rims3/Etv5/Homer1/Fcgr2b	41
GO:0042107	cytokine metabolic process	24/1817	122/23174	2.30116e-05	0.000377956	0.000265729	Il1b/Trem1/Zfp36/Akap12/Nlrp12/Trem3/Pcsk5/Tnf/Ereg/Bcl3/Tia1/Errfi1/Prg4/Il6/Myd88/Foxj1/Cebpb/Thbs1/Fcgr3/Gadd45g/Prkcq/Mast2/Tlr3/Ptafr	24
GO:0031668	cellular response to extracellular stimulus	36/1817	223/23174	2.6854e-05	0.000428305	0.000301127	Sesn3/Slc2a1/Zc3h12a/Slc38a3/Tcf7l2/Impact/Fads1/Bmf/Itga6/Lpl/Gabarapl1/Mmp9/Mybbp1a/Fos/Atf4/Vdr/Adora2b/Prkaa2/Rragd/Pim1/Rrp8/Srf/Fosl1/Ppan/Nr4a2/Fam107a/Pik3c2a/Trp53/Ncoa1/Pik3r4/Cadps2/Pik3c2b/Cd68/Arhgap35/Atg14/P2rx7	36
GO:0034250	positive regulation of cellular amide metabolic process	26/1817	139/23174	2.70314e-05	0.000430356	0.000302569	Plk3/Impact/Tnf/Cyp1b1/Picalm/Bcl3/Smpd3/Krt17/Ccn1/Il6/Eif6/Eif5a/Polr2d/Itga2/Vim/Rmnd1/Nod2/Nat10/Thbs1/Gsap/Eif4a3/Ddx39b/Eef2/Khdrbs1/Piwil2/Ptafr	26
GO:0043087	regulation of GTPase activity	44/1817	295/23174	2.79346e-05	0.000443933	0.000312115	Cdkl5/S100a10/Afdn/Epha2/Rhog/Rgs16/Tbc1d8b/Ccl11/Coro1c/Itga6/Spry2/Pkp4/Ccl2/Ccl3/Arhgap12/Picalm/Ccl9/Dock8/Ccl4/Ccl6/Dock9/Rasip1/Ntrk2/Arhgap1/Icam1/Foxj1/Map2k1/Prom2/Rrp1b/Rgs1/Snx13/Mtss2/Rangap1/Asap1/Tbc1d10a/Arhgap35/Sema4d/Cblb/Arhgap42/Ccl12/Arrb2/Vav1/Arfgef1/Tbc1d9b	44
GO:0035335	peptidyl-tyrosine dephosphorylation	10/1817	28/23174	3.01886e-05	0.000472937	0.000332506	Ptpn1/Ptpn5/Dusp1/Dusp6/Dusp5/Dusp4/Dusp10/Ptprf/Ubash3b/Ptpn12	10
GO:0009636	response to toxic substance	49/1817	343/23174	3.21027e-05	0.000498496	0.000350476	Hif1a/Zc3h12a/Actb/Hp/Slc7a11/Sphk1/Cyp2f2/Nr4a3/Mt2/Fbxo7/Timeless/Cfl1/Impact/Tnf/Sod2/Abcg2/Cyp1b1/Pten/Kcnc2/Tnfaip3/Itpr2/Ccl4/Hmox1/Smpd3/Rdh12/Ephx2/Slc31a1/Il6/Eps8/Trpm2/Anxa1/Nr4a2/Pdgfb/Ripk3/Ppif/Trp53/Pde1b/Ephx1/Ces1d/Ppp1r9a/Hk3/Sigmar1/G6pdx/Apex1/Nos3/Mbp/Cd36/Igf1r/Atp1a2	49
GO:0009991	response to extracellular stimulus	55/1817	400/23174	3.25842e-05	0.000505084	0.000355108	Sesn3/Il1b/Zfp36/Slc2a1/Zc3h12a/Slc38a3/Tcf7l2/Impact/Noct/Sod2/Fads1/Bmf/Itga6/Rasgrp4/Lpl/Gabarapl1/Mmp9/Mybbp1a/Ada/Fos/Atf4/Vdr/Adora2b/Ldlr/Slc25a25/Gdf15/Prkaa2/Rragd/Pim1/Rrp8/Srf/Fosl1/Ppan/Nr4a2/Fam107a/Pik3c2a/Trp53/Lrp6/Appl2/Pparg/Ncoa1/Nucb2/Pik3r4/Plec/Cadps2/Pik3c2b/Cd68/Arhgap35/Atg14/Trpv4/P2rx7/Gpr39/Foxk1/Ulk2/Igf1r	55
GO:0006909	phagocytosis	48/1817	334/23174	3.2969e-05	0.000510152	0.000358671	Tgm2/Sftpd/Il1b/Fpr2/Sphk1/Ptx3/Cd300lf/Slc11a1/Msr1/Tnf/Rab20/Coro1c/Pten/Ccl2/Arhgap12/Tgfb1/Fcer1g/Ldlr/Myd88/Anxa1/Lrp1/Itga2/Txndc5/Treml4/Xkr4/Myo18a/Nod2/Fgr/Rac1/Ncf4/Fcgr1/Lyar/Thbs1/Ncf2/Adipoq/Appl2/Pparg/Pik3ca/Fcgr3/Calr/Siglece/P2rx7/Atg3/Cd36/Vav1/Itgb2/Fcgr2b/Dysf	48
GO:0120032	regulation of plasma membrane bounded cell projection assembly	31/1817	182/23174	3.31717e-05	0.00051239	0.000360244	Dbn1/Cdkl5/Epha2/Pfn1/Capzb/Rhog/Cfl1/Coro1c/Dnm3/Cdc42ep2/Icam1/Eps8/Trpm2/Srf/Atp8b1/Syne2/Tacstd2/Rac1/Gm14137/Dynll1/Arpc2/Ttbk2/Ppp1r9a/Slit2/Plek2/Arhgap35/Prkcq/P2rx7/Atg3/Sept9/Kit	31
GO:0031334	positive regulation of protein complex assembly	38/1817	243/23174	3.36673e-05	0.000519136	0.000364988	Esr1/Csf3/Pfn1/Pcsk5/Ccl11/Tnf/Bmf/Mmp3/Cdc42ep2/Tgfb1/Numa1/Pde4dip/Mpp7/Rasip1/Wars/Icam1/Bid/Plek/Srf/Msn/Fosl1/Trp53/Arpc1b/Rac1/Vasp/Map1b/Gm14137/Arpc2/Cdkn1b/G3bp1/Cdk5rap2/Asap1/Mapre1/Cdt1/Cd36/Psmc4/Stub1/Tppp	38
GO:0043315	positive regulation of neutrophil degranulation	4/1817	4/23174	3.76785e-05	0.000568151	0.000399448	Itgam/Cd177/Itgb2/Ptafr	4
GO:1902565	positive regulation of neutrophil activation	4/1817	4/23174	3.76785e-05	0.000568151	0.000399448	Itgam/Cd177/Itgb2/Ptafr	4
GO:0032922	circadian regulation of gene expression	16/1817	66/23174	3.76894e-05	0.000568151	0.000399448	Ngfr/Noct/Lgr4/Per3/Rora/Ncor1/Mybbp1a/Ogt/Relb/Atf4/Cavin3/Prmt5/Cry2/Per2/Kmt2a/Rorc	16
GO:0106106	cold-induced thermogenesis	26/1817	142/23174	3.96239e-05	0.00059335	0.000417165	Il4ra/Rb1/Plcl1/Cmklr1/Adamts5/Id1/Acsl1/Dio2/Cidea/Lgr4/Ogt/Atf4/Pgam5/Cxcr4/Cebpb/Gja1/Plac8/Adam17/Adipoq/Appl2/Per2/Gadd45g/Fabp5/Dync1h1/Cd36/Igf1r	26
GO:0120161	regulation of cold-induced thermogenesis	26/1817	142/23174	3.96239e-05	0.00059335	0.000417165	Il4ra/Rb1/Plcl1/Cmklr1/Adamts5/Id1/Acsl1/Dio2/Cidea/Lgr4/Ogt/Atf4/Pgam5/Cxcr4/Cebpb/Gja1/Plac8/Adam17/Adipoq/Appl2/Per2/Gadd45g/Fabp5/Dync1h1/Cd36/Igf1r	26
GO:0000302	response to reactive oxygen species	33/1817	201/23174	4.04348e-05	0.000604466	0.00042498	Sesn3/Hp/Plk3/Sphk1/Nr4a3/Pdgfra/Fbxo7/Cfl1/Impact/Tnf/Sod2/Cyp1b1/Kcnc2/Tnfaip3/Hmox1/Smpd3/Mmp9/Fos/Egln1/Il6/Trpm2/Anxa1/Ripk3/Ppif/Trp53/Thbs1/Hk3/Sigmar1/Apex1/Nos3/Ucp3/Bcar1/Cd36	33
GO:0150077	regulation of neuroinflammatory response	10/1817	29/23174	4.28484e-05	0.000634099	0.000445814	Cd200/Ptgs2/Mmp8/Sphk1/C5ar1/Cd200r4/Ldlr/Cd200r1/Pparg/Tnfrsf1b	10
GO:0042593	glucose homeostasis	40/1817	265/23174	4.82304e-05	0.000698509	0.000491099	Sesn3/Hif1a/Ngfr/Tcf7l2/Pik3r1/Ccn4/Ogt/Adgrf5/Icam1/Il6/Map2k1/Prkaa2/Lrp1/Hectd4/Pde3b/Rac1/Hmgcr/Mpc2/Adipoq/Appl2/Zbtb20/Pparg/Dynll1/Pim3/Pik3ca/Hk3/Ptch1/Cry2/Adra2a/Sh2b2/Trpv4/Gprc5b/Fabp5/Igfbp5/Cd36/Gpr39/Foxk1/Tra2b/Rab11fip5/Igf1r	40
GO:0050803	regulation of synapse structure or activity	41/1817	275/23174	5.20331e-05	0.000739759	0.0005201	Adgre5/Sema4a/Thbs2/Dbn1/Cdkl5/Slc7a11/Afdn/Tuba1a/Bdnf/Cfl1/Slitrk4/Tnf/Srcin1/Nedd4/Dnm3/Pten/Picalm/Srgn/Ntrk2/Egln1/Ywhaz/Nptxr/Tpbg/Nptx1/Amigo3/Tubb5/Mfn1/Ppp1r9a/Fzd1/Ptprf/Sema3f/Chmp4b/Opa1/Arf4/Sema4d/Nlgn2/Lrp4/Rims3/Etv5/Homer1/Fcgr2b	41
GO:0097006	regulation of plasma lipoprotein particle levels	15/1817	61/23174	5.47454e-05	0.000766435	0.000538856	Anxa2/Soat2/Msr1/Ehd1/Lpl/Ldlr/Pla2g7/Mylip/Adipoq/Ces1d/Soat1/Vldlr/Lipg/Ldlrap1/Cd36	15
GO:0150076	neuroinflammatory response	15/1817	61/23174	5.47454e-05	0.000766435	0.000538856	Cd200/Ptgs2/Il1b/Mmp8/Fpr2/Sphk1/C5ar1/Tnf/Cd200r4/Ldlr/Lrp1/Cd200r1/Pparg/Tnfrsf1b/Tlr3	15
GO:0042088	T-helper 1 type immune response	13/1817	48/23174	5.7776e-05	0.000796226	0.0005598	Il4ra/Sema4a/Il1b/Il1r1/Slc11a1/Il6ra/Il23a/Bcl3/Il18rap/Relb/Anxa1/Gadd45g/Il18bp	13
GO:0120193	tight junction organization	13/1817	48/23174	5.7776e-05	0.000796226	0.0005598	Snai1/Afdn/Epha2/Cgn/Pof1b/Tnf/Mpp7/Cldn1/Gja1/Srf/Nphp4/Cdh1/Mpp5	13
GO:0032956	regulation of actin cytoskeleton organization	48/1817	342/23174	6.03127e-05	0.00082394	0.000579285	Dbn1/Rhou/Csf3/S100a10/Pfn1/Capzb/Id1/Lpar1/Rhog/Ccl11/Cfl1/Myadm/Bst1/Cd2ap/Cdc42ep2/Pik3r1/Rnd1/Tgfb1/Icam1/Eps8/Limch1/Plek/Trpm2/Sdc4/Arhgdia/Sptbn1/Lrp1/Sh3pxd2b/Fam107a/Fgr/Tacstd2/Arpc1b/Rac1/Vasp/Ccn2/Prox1/Gm14137/Fhod3/Arpc2/Ppp1r9a/Edn1/Slit2/Arhgap35/Limk1/Prkcq/Ilk/Dlc1/Arfgef1	48
GO:0002819	regulation of adaptive immune response	33/1817	205/23174	6.03475e-05	0.00082394	0.000579285	Il4ra/Nlrp3/Il1b/Il1r1/Zc3h12a/Slc11a1/Tnf/Tap2/Il6ra/Il23a/Tnfaip3/Tgfb1/Fcer1g/Pvr/Ada/Il6/Foxj1/Anxa1/Cd44/Nfkbid/Ripk3/Nod2/Fcgr1/Cd55/Tnfrsf1b/Dusp10/Fcgr3/Mif/Shld2/Hpx/Prkcq/P2rx7/Fcgr2b	33
GO:0060759	regulation of response to cytokine stimulus	22/1817	114/23174	6.71604e-05	0.000901403	0.000633747	Il1r2/Csf1/Il1r1/Ecm1/Sphk1/Cd300lf/Casp4/Il1rn/Padi2/Il6/Adam17/Ikbke/Adipoq/Pparg/Ptprf/Trim6/Slit2/Cactin/Hpx/Samhd1/Angpt1/Crebrf	22
GO:0051817	modification of morphology or physiology of other organism involved in symbiotic interaction	19/1817	91/23174	6.84063e-05	0.000910021	0.000639806	Cxcl1/Sftpd/Anxa2/Trem1/Zc3h12a/Ptx3/Cxcl5/Trem3/Cfl1/Myc/Tgfb1/Ccl4/Pf4/Mmp9/Zfp72/Tnip1/Ppib/Ccr5/Rrp1b	19
GO:0009108	coenzyme biosynthetic process	31/1817	189/23174	6.94894e-05	0.000921649	0.000647981	Hif1a/Ier3/Acsl1/Myc/Prxl2c/Ncor1/Ogt/Pdss1/Prkaa2/Ddit4/Eif6/Trp53/Mat1a/Mpc2/Pank3/Aldoc/Acsl5/Zbtb20/Coq10b/Mat2a/Pgam1/Hk3/G6pdx/Coq8a/Adpgk/Mif/Eno2/Coasy/Pfkfb2/P2rx7/Foxk1	31
GO:0006914	autophagy	52/1817	383/23174	7.36626e-05	0.000966366	0.00067942	S100a8/Sesn3/S100a9/Hif1a/Zc3h12a/Vps13a/Plk3/Fbxo7/Dapk1/Bmf/Qsox1/Pik3cb/Trim8/Tmem173/Tnfaip3/Mefv/Hmox1/Gabarapl1/Plk2/Atg9b/Rasip1/Bid/Map2k1/Prkaa2/Vps13d/Rragd/Pik3c2a/Nod2/Trp53/Lix1l/Mcl1/Depp1/Usp10/Tpcn2/Herc1/Pik3r4/Pik3c2b/Usp36/Rubcn/Chmp4b/Atg14/Fyco1/Trim30a/Bag3/Klhl22/Atg3/Tmem150a/Cd84/Foxk1/Trib3/Stub1/Ulk2	52
GO:0061919	process utilizing autophagic mechanism	52/1817	383/23174	7.36626e-05	0.000966366	0.00067942	S100a8/Sesn3/S100a9/Hif1a/Zc3h12a/Vps13a/Plk3/Fbxo7/Dapk1/Bmf/Qsox1/Pik3cb/Trim8/Tmem173/Tnfaip3/Mefv/Hmox1/Gabarapl1/Plk2/Atg9b/Rasip1/Bid/Map2k1/Prkaa2/Vps13d/Rragd/Pik3c2a/Nod2/Trp53/Lix1l/Mcl1/Depp1/Usp10/Tpcn2/Herc1/Pik3r4/Pik3c2b/Usp36/Rubcn/Chmp4b/Atg14/Fyco1/Trim30a/Bag3/Klhl22/Atg3/Tmem150a/Cd84/Foxk1/Trib3/Stub1/Ulk2	52
GO:0071383	cellular response to steroid hormone stimulus	27/1817	156/23174	7.83933e-05	0.00101234	0.000711744	Pgr/Esr1/Zfp36/Sgk1/Acod1/Ncoa3/Cyp7b1/Bdnf/Tgfb1/Ncor1/Ntrk2/Padi2/Ddit4/Anxa1/Eif4e/Fam107a/Sfrp1/Ddx5/Zfp36l1/Cry2/Calr/Nr3c1/Phb2/Arrb2/Crebrf/Trip4/Atp1a2	27
GO:0035150	regulation of tube size	29/1817	173/23174	7.88263e-05	0.00101644	0.000714628	Ptgs2/Hif1a/Mgll/Tnf/Sod2/Ece1/Dusp5/Smpd3/Gja5/Adora2b/Icam1/Map2k1/Gja1/Pdgfb/Hmgcr/Gucy1a1/Adcy6/Adra2a/G6pdx/Per2/Edn1/Adm/Nos3/Foxc1/Manf/Alox5/Arhgap42/Ptafr/Atp1a2	29
GO:0001649	osteoblast differentiation	32/1817	199/23174	7.90784e-05	0.00101821	0.000715868	Pdlim7/Areg/Epha2/Id1/Noct/Tnf/Junb/Lgr4/Ccn4/Ccn1/Il6/Bmp3/Cebpb/Clec5a/Gja1/Sh3pxd2b/Sfrp1/Acvr1/Fbn2/Ddx5/Ptch1/Fzd1/Id3/Sema4d/Cited1/Igfbp5/Ilk/Cebpd/Cbfb/Lmna/Wwtr1/Creb3l1	32
GO:0043547	positive regulation of GTPase activity	34/1817	217/23174	8.18095e-05	0.00104121	0.000732042	Cdkl5/S100a10/Afdn/Epha2/Rhog/Rgs16/Tbc1d8b/Ccl11/Coro1c/Itga6/Pkp4/Ccl2/Ccl3/Picalm/Ccl9/Dock8/Ccl4/Ccl6/Dock9/Icam1/Foxj1/Map2k1/Rgs1/Snx13/Mtss2/Rangap1/Asap1/Tbc1d10a/Arhgap35/Sema4d/Arhgap42/Ccl12/Vav1/Tbc1d9b	34
GO:0099173	postsynapse organization	31/1817	191/23174	8.50368e-05	0.00107453	0.00075547	Ndrg1/Dbn1/Cdkl5/Actb/Slc7a11/Afdn/Cfl1/Lgmn/Srcin1/Dnm3/Pten/Srgn/Actn1/Egln1/Nptxr/Nptx1/Mfn1/Ppp1r9a/Ptprf/Sema3f/Chmp4b/Opa1/Ophn1/Arf4/Nlgn2/Prmt3/Lrp4/Etv5/Homer1/Fcgr2b/Igf1r	31
GO:1904659	glucose transmembrane transport	21/1817	108/23174	8.69487e-05	0.00109712	0.00077135	Esr1/Il1b/Slc2a1/Nr4a3/Slc2a9/Crebl2/Tnf/Myc/Slc2a3/Pid1/Yes1/Rnasel/Ak1/Adipoq/Appl2/Edn1/Mif/Sh2b2/Fabp5/Erbb4/Trib3	21
GO:0050919	negative chemotaxis	12/1817	44/23174	0.000102831	0.00126495	0.000889343	Sema4a/Lgr4/Sema6b/Nrg1/Sema7a/Pdgfa/Sema4c/Sema3f/Slit2/Sema4d/Robo2/Sema6c	12
GO:0001666	response to hypoxia	32/1817	202/23174	0.000105696	0.00129658	0.000911583	Hif1a/Plk3/Kcnk2/Ece1/Myc/Adam8/Pten/Rora/Itpr1/Itpr2/Hmox1/Ddah1/P4hb/Ada/Ogt/Egln1/Vasn/Map2k1/Ddit4/Adam17/Fosl2/Nr4a2/Trp53/Slc11a2/Flt1/Loxl2/Zfp36l1/Hyou1/Edn1/Ucp3/Vldlr/Stub1	32
GO:0035264	multicellular organism growth	33/1817	212/23174	0.000117426	0.00141489	0.00099476	Socs2/Dio3/Kmt2c/Csf1/Ncoa3/Tcf7l2/Lgmn/Gpat4/Smpd3/Ncor1/Ercc1/Atrx/Kat2a/Slc25a25/Gdf15/Sh3pxd2b/Plac8/Ppib/Klf2/Atrn/Trp53/Gdf5/Zfp36l1/Pik3ca/Nipbl/Ptch1/G6pdx/Taf10/Gpam/Clic4/Atf5/Slc12a2/Wwtr1	33
GO:0097746	regulation of blood vessel diameter	27/1817	160/23174	0.000121939	0.00146526	0.00103018	Ptgs2/Hif1a/Mgll/Tnf/Sod2/Ece1/Dusp5/Smpd3/Gja5/Adora2b/Icam1/Map2k1/Gja1/Pdgfb/Hmgcr/Gucy1a1/Adcy6/Adra2a/G6pdx/Per2/Edn1/Adm/Manf/Alox5/Arhgap42/Ptafr/Atp1a2	27
GO:0001505	regulation of neurotransmitter levels	50/1817	372/23174	0.000129089	0.00153652	0.00108028	Hdc/Esr1/Ptgs2/Il1b/Mmp8/Zc3h12a/Slc7a11/Sept5/Sphk1/Ptx3/Syt9/Ngf/Tnf/Sod2/Slc6a2/Cyp1b1/Rora/Smpd3/Ddah1/Cacnb4/Nr3c2/Ntrk2/Adora2b/Icam1/Il6/Stx11/Tmem106a/Gla/Klf2/Rac1/Pde1b/Arl6ip5/Aldh6a1/Selenos/Dynll1/Cadps2/Ppp1r9a/Adra2a/Per2/Atp2b2/Nos3/Syn2/Aasdh/Rap1b/P2rx7/Cd36/Rims3/Itgb2/Tha1/Atp1a2	50
GO:0035425	autocrine signaling	5/1817	8/23174	0.000134935	0.00159108	0.00111864	S100a8/S100a9/Hilpda/Fzd1/Cd68	5
GO:0002923	regulation of humoral immune response mediated by circulating immunoglobulin	6/1817	12/23174	0.000140757	0.00165751	0.00116534	Tnf/Foxj1/Nod2/Cd55/Hpx/Fcgr2b	6
GO:1901570	fatty acid derivative biosynthetic process	13/1817	52/23174	0.000141534	0.00166223	0.00116866	Ptgs2/Il1b/Sphk1/Alox5ap/Acsl1/Pnpla8/Anxa1/Far1/Acsl5/Edn1/Mif/Alox5/Fabp5	13
GO:0045624	positive regulation of T-helper cell differentiation	8/1817	22/23174	0.000165526	0.00188137	0.00132273	Il4ra/Nlrp3/Il23a/Il6/Anxa1/Nfkbid/Myb/Shb	8
GO:0090118	receptor-mediated endocytosis involved in cholesterol transport	4/1817	5/23174	0.000176599	0.00198267	0.00139395	Anxa2/Ldlr/Lrp6/Ldlrap1	4
GO:0016052	carbohydrate catabolic process	24/1817	138/23174	0.000176912	0.00198267	0.00139395	Chil3/Hif1a/Ier3/Myc/Prxl2c/Ncor1/Ogt/Pygb/Prkaa2/Ddit4/Eif6/Sord/Trp53/Aldoc/Zbtb20/Scarb2/Pgam1/Hk3/Adpgk/Mif/Eno2/Pfkfb2/P2rx7/Foxk1	24
GO:0050777	negative regulation of immune response	26/1817	155/23174	0.000178249	0.0019926	0.00140093	Il4ra/Zc3h12a/Acod1/Olfm4/Ccr1/Tnf/Tap2/Tnfaip3/Arg2/Tgfb1/Hmox1/Foxj1/Anxa1/Nod2/Pparg/Selenos/Dusp10/Cactin/Dhx58/Lgals3/Samhd1/Angpt1/Cd84/Arrb2/Fgl2/Fcgr2b	26
GO:0110111	negative regulation of animal organ morphogenesis	11/1817	40/23174	0.000183337	0.00204518	0.0014379	Dio3/Nfib/Tnf/Thrb/Tacstd2/Lrp6/Tnfrsf11b/Lims2/Bcor/Foxc1/Cited1	11
GO:2000178	negative regulation of neural precursor cell proliferation	9/1817	28/23174	0.000192259	0.00213069	0.00149802	Il1b/Kctd11/Bdnf/Tgfb1/Trp53/Ccr5/Appl2/Lims2/Ilk	9
GO:0042035	regulation of cytokine biosynthetic process	20/1817	106/23174	0.000194547	0.00214756	0.00150988	Il1b/Zfp36/Akap12/Nlrp12/Tnf/Ereg/Bcl3/Tia1/Errfi1/Prg4/Il6/Myd88/Foxj1/Cebpb/Thbs1/Fcgr3/Prkcq/Mast2/Tlr3/Ptafr	20
GO:0097756	negative regulation of blood vessel diameter	20/1817	106/23174	0.000194547	0.00214756	0.00150988	Ptgs2/Hif1a/Mgll/Dusp5/Smpd3/Gja5/Icam1/Map2k1/Gja1/Pdgfb/Hmgcr/G6pdx/Per2/Edn1/Adm/Manf/Alox5/Arhgap42/Ptafr/Atp1a2	20
GO:0007163	establishment or maintenance of cell polarity	33/1817	219/23174	0.000219122	0.00236726	0.00166434	Rhou/Rhog/Cfl1/Spry2/Dock8/Rnd1/Pkd1/Numa1/Foxj1/Parvb/Gja1/Msn/Myo18a/Hes1/Syne2/Map1b/Dlg3/Fermt1/Cdk5rap2/Ophn1/Arhgap35/Arf4/Mpp5/Ilk/Rap1b/Frmd4a/Rpgrip1l/Cap1/Kif3a/Amotl1/Lmna/Arfgef1/Igf1r	33
GO:1905521	regulation of macrophage migration	11/1817	41/23174	0.000232956	0.00250264	0.00175953	Cd200/Csf1/Cmklr1/C5ar1/Ccl2/Emilin1/Mtus1/Cd200r1/Thbs1/Mif/Trpv4	11
GO:1901617	organic hydroxy compound biosynthetic process	34/1817	229/23174	0.000236041	0.0025327	0.00178066	Isyna1/Ch25h/Plcl1/Hdc/Il1b/Snai1/Slc7a11/Sphk1/Cyp7b1/Tnf/Plce1/Cd244a/Vdr/Adcyap1r1/Prkaa2/Plek/Nr4a2/Trp53/Hmgcr/Plcg1/Ephx1/Prox1/Ces1d/Msmo1/G6pdx/Fdft1/Per2/Cyp27a1/Dhcr24/Hmgcs2/Cited1/Asah2/Sec14l2/Ptafr	34
GO:0042445	hormone metabolic process	32/1817	211/23174	0.000240468	0.00257338	0.00180926	Chst8/Dio3/Esr1/Il1b/Tiparp/Hif1a/Crabp1/Pdgfra/Tcf7l2/Pcsk5/Tnf/Ece1/Dio2/Ddo/Cyp1b1/Dhrs9/Slco4a1/Cpe/Rdh12/Vdr/Pcsk6/Ugt1a7c/Dhrs3/Retsat/Nr3c1/Adm/Cyp27a1/Gcnt4/Duoxa1/Stub1/Rdh10/Igf1r	32
GO:0099175	regulation of postsynapse organization	22/1817	124/23174	0.000241273	0.00257338	0.00180926	Dbn1/Cdkl5/Slc7a11/Afdn/Cfl1/Srcin1/Dnm3/Pten/Srgn/Egln1/Nptxr/Nptx1/Mfn1/Ppp1r9a/Ptprf/Sema3f/Chmp4b/Opa1/Arf4/Lrp4/Homer1/Fcgr2b	22
GO:0033750	ribosome localization	6/1817	13/23174	0.000244049	0.00257338	0.00180926	Eif6/Sdad1/Zfp593/Ltv1/Ran/Rrs1	6
GO:0034381	plasma lipoprotein particle clearance	10/1817	35/23174	0.000254262	0.00266341	0.00187255	Anxa2/Msr1/Ehd1/Ldlr/Mylip/Adipoq/Vldlr/Lipg/Ldlrap1/Cd36	10
GO:0010035	response to inorganic substance	61/1817	493/23174	0.000263559	0.00274126	0.00192729	Atp12a/Zc3h12a/Hp/Sphk1/Nr4a3/Mt2/Syt9/Fbxo7/Alox5ap/Timeless/Cfl1/Impact/Tnf/Sod2/Lgmn/Cyp1b1/Junb/Kcnc2/Tnfaip3/Hmox1/Smpd3/Mmp9/Atrx/Fos/Chp2/Nr4a1/Egln1/Il6/Slc25a24/Prkaa2/Trpm2/Fibin/Anxa1/Nr4a2/Krt8/Ripk3/Ppif/Sord/Fosb/Trp53/Scn5a/Slc11a2/Thbs1/Nptx1/Loxl2/Pparg/Hk3/Ptch1/Cdkn1b/Sigmar1/Cdh1/Apex1/Nos3/Ucp3/Clic4/S100a16/Bcar1/P2rx7/Cd36/Gpr39/Homer1	61
GO:0002604	regulation of dendritic cell antigen processing and presentation	5/1817	9/23174	0.000283935	0.00292901	0.00205929	Slc11a1/Nod2/Thbs1/Cd68/Fgl2	5
GO:0031622	positive regulation of fever generation	5/1817	9/23174	0.000283935	0.00292901	0.00205929	Ptgs2/Il1b/Tnf/Ccr5/Tnfrsf11a	5
GO:0006006	glucose metabolic process	30/1817	195/23174	0.000288148	0.00296554	0.00208497	Pgm2l1/Hif1a/Tcf7l2/Tnf/Myc/Rora/Pik3r1/Midn/Ogt/Kat2a/Atf4/Il6/Hectd4/Trp53/Adipoq/C1qtnf1/Pik3ca/H6pd/G6pdx/Per2/Ganc/Nr3c1/Adpgk/Dyrk2/Epm2aip1/Pfkfb2/Fabp5/Igfbp5/Foxk1/Rorc	30
GO:0006364	rRNA processing	29/1817	187/23174	0.000314502	0.00321054	0.00225722	Rpl7l1/Nhp2/Gar1/Rrp8/Ebna1bp2/Rpl10a/Nol6/Mrto4/Ftsj3/Las1l/Rnasel/Nat10/Lyar/Nop2/Bop1/Rrp1b/Rrp9/Utp18/Ddx21/Nob1/Heatr1/Naf1/Usp36/Ddx56/Exosc2/Rrp15/Rpf2/Bysl/Rrs1	29
GO:0045927	positive regulation of growth	42/1817	308/23174	0.000315858	0.00322066	0.00226434	Dio3/Csf1/Dbn1/Cdkl5/Sgk1/Hbegf/Serpine1/Afdn/Sphk1/Ncoa3/Ngf/Bdnf/Cfl1/Fgfr2/Sfn/Picalm/Krt17/Nrg1/Ccn4/Sema7a/Cxcr4/Pim1/Srf/Lrp1/Sh3pxd2b/Adam17/Ppib/Sfrp1/Bcl11a/Map1b/Prox1/Nipbl/Ddx39b/Nr3c1/Edn1/Gpam/Exosc2/Sema4d/Limk1/Ilk/Erbb4/Klhl22	42
GO:1902882	regulation of response to oxidative stress	18/1817	94/23174	0.000329775	0.00333793	0.00234679	Sesn3/Hif1a/Slc7a11/Acox2/Nr4a3/Fbxo7/Tnf/Sod2/Mmp3/P4hb/Fut8/Atf4/Trpm2/Trp53/Mcl1/Hk3/Fzd1/Cd36	18
GO:0009895	negative regulation of catabolic process	40/1817	292/23174	0.000394438	0.0038958	0.00273901	Timp1/Il1b/Anxa2/Zfp36/Ier3/Hp/Slc11a1/Noct/Tnf/Bmf/Qsox1/Cidea/Tnfaip3/Hmox1/Hcar2/Nrg1/Rasip1/Ogt/Myd88/Ddit4/Pde3b/Trp53/Hmgcr/Mcl1/Dbi/Herc1/Adra2a/Naf1/Usp36/Rubcn/Sgta/Chmp4b/Ophn1/Map1a/Sf3b3/Serpine2/Klhl22/Foxk1/Ybx1/Dysf	40
GO:0021915	neural tube development	29/1817	190/23174	0.000412343	0.00401863	0.00282537	Hif1a/Epha2/Pfn1/Tcf7l2/Cfl1/Tgfb1/Kat2a/Sdc4/Hes1/Sfrp1/Lrp6/Sema4c/Vasp/Tgif1/Tbc1d32/Cecr2/Ift172/Zfp36l1/Ttbk2/Ptch1/Fzd1/Adm/Opa1/Arhgap35/Wdr19/Rpgrip1l/C2cd3/Kif3a/Dlc1	29
GO:0000027	ribosomal large subunit assembly	10/1817	37/23174	0.000417562	0.00405348	0.00284987	Mrpl20/Nle1/Ppan/Mrto4/Nop2/Bop1/Ddx28/Rsl24d1/Rpf2/Rrs1	10
GO:1905039	carboxylic acid transmembrane transport	19/1817	104/23174	0.00042608	0.00411162	0.00289075	Slc16a3/Slc7a8/Slc38a3/Slc7a11/Slc7a1/Slc7a10/Tnf/Slc19a1/Myc/Emb/Slc7a5/Slc38a1/Mpc2/Thbs1/Acsl5/Arl6ip5/Per2/Slc7a7/Abcc1	19
GO:0033627	cell adhesion mediated by integrin	14/1817	65/23174	0.000427795	0.00412366	0.00289921	Ret/Lyn/Itga5/Serpine1/Epha2/Cyp1b1/Itga6/Ada/Icam1/Itga2/Adam17/Fermt1/Itgb2/Itgb8	14
GO:0051495	positive regulation of cytoskeleton organization	32/1817	218/23174	0.00043488	0.00418738	0.00294401	Csf3/S100a10/Pfn1/Id1/Lpar1/Ccl11/Cfl1/Cdc42ep2/Numa1/Pde4dip/Icam1/Limch1/Plek/Sdc4/Sh3pxd2b/Arpc1b/Rac1/Vasp/Map1b/Ccn2/Prox1/Gm14137/Arpc2/Cdkn1b/Cdk5rap2/Mapre1/Edn1/Limk1/Trpv4/Prkcq/Dync1h1/Ranbp1	32
GO:1905314	semi-lunar valve development	9/1817	31/23174	0.000452692	0.00429327	0.00301846	Rb1/Emilin1/Tgfb1/Sox9/Gja5/Tnfrsf1b/Slit2/Nos3/Robo2	9
GO:0033619	membrane protein proteolysis	12/1817	51/23174	0.00046344	0.00435772	0.00306377	Ret/Timp1/Il1b/Tnf/Adam8/Tgfb1/Adam17/Snx33/Tnfrsf1b/Adra2a/Prkcq/P2rx7	12
GO:0010643	cell communication by chemical coupling	3/1817	3/23174	0.000481283	0.00448723	0.00315482	Dbn1/Gja5/Gja1	3
GO:0072659	protein localization to plasma membrane	38/1817	277/23174	0.000528254	0.00484325	0.00340513	Anxa2/Ramp1/Actb/S100a10/Afdn/Epha2/Rhog/Myadm/Tnf/Pik3r1/Ehd3/Picalm/Tgfb1/Fcer1g/Tnik/Pid1/Sptbn1/Lrp1/Lrp6/Rac1/Rab8b/Adipoq/Gorasp2/Adcy6/Dennd4c/Tmbim1/Ptch1/Nkd2/Cdh1/Cnst/Nsf/Mrap/Lgals3/Mpp5/Ldlrap1/Tmem150a/Slmap/Cacnb3	38
GO:0120031	plasma membrane bounded cell projection assembly	59/1817	486/23174	0.000535976	0.00490385	0.00344773	Dbn1/Cdkl5/Epha2/Pfn1/Capzb/Lpar1/Rhog/Emp1/Cfl1/Ehd1/Coro1c/Celsr3/Itga6/Dnm3/Cdc42ep2/Ehd3/Abcc4/Tnik/Icam1/Foxj1/Eps8/Parvb/Trpm2/Srf/Atp8b1/Bbs9/E2f4/Syne2/Tacstd2/Ablim3/Rac1/Lrrc61/Tbc1d32/Gm14137/Ift172/Dynll1/B9d2/Mtss2/Arpc2/Ttbk2/Ppp1r9a/Ablim1/Asap1/Slit2/Plek2/Arhgap35/Wdr19/Prkcq/Emp3/P2rx7/Atg3/Ptpn23/Rpgrip1l/Sept9/C2cd3/Ssx2ip/Kit/Kif3a/Wwtr1	59
GO:0006405	RNA export from nucleus	15/1817	74/23174	0.000538681	0.00491839	0.00345796	Ddx39/Nup93/Eif6/Eif5a/Polr2d/Sdad1/Nol6/Zfp593/Ltv1/Ran/Ddx39b/Khdrbs1/Nxf7/Rrs1/Nxt1	15
GO:1903798	regulation of production of miRNAs involved in gene silencing by miRNA	7/1817	20/23174	0.000560285	0.00505805	0.00355615	Esr1/Zc3h12a/Tgfb1/Ncor1/Map2k1/Trp53/Ddx5	7
GO:0046165	alcohol biosynthetic process	23/1817	141/23174	0.000614907	0.00544958	0.00383142	Isyna1/Plcl1/Il1b/Sphk1/Tnf/Plce1/Cd244a/Vdr/Adcyap1r1/Prkaa2/Plek/Hmgcr/Plcg1/Ephx1/Ces1d/G6pdx/Fdft1/Cyp27a1/Dhcr24/Hmgcs2/Asah2/Sec14l2/Ptafr	23
GO:0062014	negative regulation of small molecule metabolic process	18/1817	99/23174	0.000633228	0.00556837	0.00391493	Snai1/Ier3/Tgfb1/Smpd3/Pid1/Il6/Plek/Ddit4/Pde2a/Ppif/Trp53/Adipoq/Dbi/Appl2/Prox1/Pde12/Entpd1/Trib3	18
GO:1905475	regulation of protein localization to membrane	28/1817	186/23174	0.000642726	0.00563503	0.00396181	Dbn1/Actb/Slc7a11/Epha2/Rhog/Tnf/Pik3r1/Ccl2/Picalm/Tgfb1/Ogt/Tnik/Pid1/Map2k1/Sptbn1/Lrp1/Arpc2/Pmaip1/Tcaf1/Tmbim1/Nkd2/Cnst/Mrap/Nlgn2/Lgals3/Ldlrap1/Lrp4/Cacnb3	28
GO:0003012	muscle system process	49/1817	391/23174	0.00076262	0.00653674	0.00459577	Ptgs2/Dbn1/Zc3h12a/Sphk1/Nr4a3/Ece1/Ehd3/Arg2/Map2k4/Smpd3/Errfi1/Ccn4/Ada/Stc1/Gja5/Adora2b/Map2k1/Cxcr4/Pde4b/Srf/Itga2/Prok2/Scn5a/Gucy1a1/Tpm2/Ccn2/Kcnq1/Tpcn2/Kcnj2/Tnfrsf1b/Dsp/Tnni2/Adra2a/G6pdx/Ddx39b/Tmem38b/Nr3c1/Edn1/Nos3/Cald1/Igfbp5/Arhgap42/Slmap/Kit/Homer1/Lmna/Cmya5/Ptafr/Atp1a2	49
GO:0051291	protein heterooligomerization	25/1817	161/23174	0.000772784	0.00660461	0.00464349	Anxa2/S100a10/Rcc1/Kcnc2/Pkd1/Ogt/Farsa/Pdss1/Cldn1/Map2k1/Prkaa2/Birc3/Ripk3/Adipoq/Aldoc/C1qtnf1/Mat2a/C1qtnf6/Ilk/Trps1/Sept9/Lrp4/Rrm2/Col6a1/Igf1r	25
GO:2000727	positive regulation of cardiac muscle cell differentiation	8/1817	27/23174	0.000806734	0.00682016	0.00479503	Tgfb1/Nrg1/Ccn4/Kat2a/Ddx39b/Nr3c1/Edn1/Arrb2	8
GO:0009914	hormone transport	47/1817	372/23174	0.000811014	0.00683857	0.00480798	Osm/Lyn/Il1b/Nnat/Hif1a/Lif/Inhba/Syt9/Tcf7l2/Tnf/Dio2/Midn/Il1rn/Cpe/Smpd3/Hcar2/Ywhaz/Il6/Gja1/Trpm2/Anxa1/Lrp1/Pde3b/Sfrp1/Rac1/Hmgcr/Mpc2/Rab8b/Adipoq/Kcnq1/Pparg/C1qtnf1/Dynll1/Sirt3/Pim3/Nucb2/Cry2/Adra2a/Per2/Edn1/Adm/Rab11fip1/Nlgn2/Trpv4/Pfkfb2/Gpr39/Rab11fip5	47
GO:0009743	response to carbohydrate	29/1817	198/23174	0.000815765	0.00686953	0.00482974	Il1b/Nnat/Hif1a/Tcf7l2/Ogt/Icam1/Prkaa2/Lrp1/Pde3b/Rac1/Hmgcr/Mpc2/Thbs1/Ncf2/Adipoq/Zbtb20/Dynll1/Pim3/Zfp36l1/Pik3ca/Adra2a/Cdt1/Gpam/Pfkfb2/Rps6ka2/Gpr39/Tra2b/Rab11fip5/Igf1r	29
GO:1900407	regulation of cellular response to oxidative stress	16/1817	85/23174	0.000840834	0.00698978	0.00491429	Hif1a/Slc7a11/Nr4a3/Fbxo7/Tnf/Sod2/Mmp3/P4hb/Fut8/Atf4/Trpm2/Trp53/Mcl1/Hk3/Fzd1/Cd36	16
GO:0002468	dendritic cell antigen processing and presentation	5/1817	11/23174	0.000910958	0.00747466	0.00525518	Slc11a1/Nod2/Thbs1/Cd68/Fgl2	5
GO:0034115	negative regulation of heterotypic cell-cell adhesion	5/1817	11/23174	0.000910958	0.00747466	0.00525518	Myadm/Tnfaip3/Il1rn/Adipoq/Mbp	5
GO:0070587	regulation of cell-cell adhesion involved in gastrulation	5/1817	11/23174	0.000910958	0.00747466	0.00525518	Myadm/Tnfaip3/Il1rn/Adipoq/Mbp	5
GO:0150079	negative regulation of neuroinflammatory response	5/1817	11/23174	0.000910958	0.00747466	0.00525518	Cd200/Ldlr/Cd200r1/Pparg/Tnfrsf1b	5
GO:0140014	mitotic nuclear division	35/1817	256/23174	0.000911027	0.00747466	0.00525518	Rb1/Esr1/Il1b/Sphk1/Tnf/Bub3/Fgfr2/Ereg/Rcc1/Tubg1/Tgfb1/Numa1/Smpd3/Ube2s/Atrx/Eps8/Nek6/Pdgfb/Nipbl/Cdkn1b/Cdk5rap2/Ran/Cdt1/Tom1l1/Phip/Edn1/Chmp4b/Phb2/Klhl22/Chmp4c/Rrs1/Ranbp1/Tgfa/Tnks/Igf1r	35
GO:0002467	germinal center formation	6/1817	16/23174	0.000927413	0.00758089	0.00532987	Tnfaip3/Bcl3/Nfkb2/Ada/Foxj1/Adam17	6
GO:1905330	regulation of morphogenesis of an epithelium	19/1817	111/23174	0.000977553	0.00791737	0.00556644	Esr1/Lif/Pdgfra/Tnf/Celsr3/Lgr4/Pten/Tgfb1/Sox9/Pdgfa/Sfrp1/Tacstd2/Lrp6/Rac1/Fzd1/Cdh1/Phb2/Cited1/Etv5	19
GO:0043303	mast cell degranulation	11/1817	48/23174	0.00100199	0.00809296	0.00568989	Il4ra/Lyn/Nr4a3/Fcer1g/Hmox1/Adora2b/Ywhaz/Fgr/Lat2/Cd84/Kit	11
GO:0043255	regulation of carbohydrate biosynthetic process	18/1817	103/23174	0.00102556	0.0082607	0.00580783	Hif1a/Tcf7l2/Cd244a/Tgfb1/Smpd3/Has2/Ogt/Kat2a/Adcyap1r1/Il6/Plek/Pdgfb/Adipoq/Nr3c1/Dyrk2/Epm2aip1/Foxk1/Ptafr	18
GO:0071456	cellular response to hypoxia	17/1817	95/23174	0.0010648	0.00851457	0.00598631	Hif1a/Plk3/Kcnk2/Myc/Adam8/Pten/Rora/Ddah1/P4hb/Ogt/Vasn/Map2k1/Trp53/Zfp36l1/Hyou1/Vldlr/Stub1	17
GO:0036314	response to sterol	7/1817	22/23174	0.00107245	0.00854474	0.00600753	Inhba/Rora/Tgfb1/Lrp6/Ccr5/Ptch1/Rorc	7
GO:0150094	amyloid-beta clearance by cellular catabolic process	4/1817	7/23174	0.00108687	0.00856677	0.00602302	Ldlr/Lrp1/Cd36/Lrp4	4
GO:1905461	positive regulation of vascular associated smooth muscle cell apoptotic process	4/1817	7/23174	0.00108687	0.00856677	0.00602302	Pdcd4/Sod2/Atf4/Pparg	4
GO:1902117	positive regulation of organelle assembly	15/1817	79/23174	0.00109988	0.00866159	0.00608968	Sdc1/Tnf/Numa1/Sdc4/Msn/Prox1/Dynll1/Arpc2/Ttbk2/G3bp1/Asap1/Edn1/Arhgap35/Dync1h1/Sept9	15
GO:0098742	cell-cell adhesion via plasma-membrane adhesion molecules	29/1817	202/23174	0.001124	0.00884357	0.00621763	Ret/Itga5/Myadm/Celsr3/Pik3cb/Mcam/Emb/Tnfaip3/Sele/Il1rn/Pvr/Cldn1/Selp/Dsc3/Arvcf/Acvr1/Sdk2/Cd177/Adipoq/Amigo3/Lgals1/Ptprf/Cdh1/Robo2/Mbp/Alcam/Ptpn23/Atp2c1/Esam	29
GO:0120162	positive regulation of cold-induced thermogenesis	17/1817	96/23174	0.00120117	0.00936371	0.00658332	Il4ra/Cmklr1/Acsl1/Dio2/Ogt/Cxcr4/Cebpb/Gja1/Plac8/Adipoq/Appl2/Per2/Gadd45g/Fabp5/Dync1h1/Cd36/Igf1r	17
GO:0009615	response to virus	36/1817	270/23174	0.00122468	0.00951688	0.00669101	Nlrp3/Il1b/Zc3h12a/Ifitm2/Ifitm1/Tnf/Ifitm6/Tmem173/Tlr13/Il23a/Bcl3/Oas2/Isg15/Oas3/Il6/Myd88/Ddit4/Traf3ip2/Treml4/Ifitm3/Ikbke/Rnasel/Trim15/Rrp1b/Ifit2/Mill2/G3bp1/Ddx21/Trim6/Oasl1/Dhx58/Gpam/Trim30a/Samhd1/Tlr3/Fgl2	36
GO:0044262	cellular carbohydrate metabolic process	37/1817	281/23174	0.00132791	0.0102142	0.00718127	Isyna1/Hif1a/Ier3/B4galt5/Tcf7l2/Abcg2/Pten/Rora/Cd244a/Midn/Has2/Ogt/Pygb/Kat2a/Adcyap1r1/Il6/Plek/Ddit4/Sord/Trp53/Ugp2/Adipoq/Scarb2/Inpp4b/C1qtnf1/Pgam1/Per2/Nr3c1/Dyrk2/Epm2aip1/Pfkfb2/Igfbp5/Foxk1/Ptafr/Dysf/Rorc/Slc5a3	37
GO:0060149	negative regulation of posttranscriptional gene silencing	6/1817	17/23174	0.00133873	0.0102142	0.00718127	Esr1/Zc3h12a/Tgfb1/Ncor1/Trp53/Pparg	6
GO:0060967	negative regulation of gene silencing by RNA	6/1817	17/23174	0.00133873	0.0102142	0.00718127	Esr1/Zc3h12a/Tgfb1/Ncor1/Trp53/Pparg	6
GO:0010256	endomembrane system organization	47/1817	381/23174	0.00134356	0.0102422	0.00720093	Rab5c/Ndrg1/S100a9/Plk3/Coro1c/Cavin2/Pten/Ehd3/Nup93/Srgn/Pde4dip/Atl3/Ywhaz/Map2k1/Cxcr4/Sptbn1/Atp8b1/Xkr4/Myo18a/Syne2/Snx33/Pi4k2a/Fam160a2/Kifc3/Mtss2/Gorasp2/Prmt5/Tmem170/Gcc2/Asap1/Tmem38b/Col5a1/Sgta/Chmp4b/Atp8b4/Zpbp2/Tmed9/Mpp5/Serpine2/P2rx7/A4galt/Plscr4/Lmna/Dysf/Rtn3/Arfgef1/Atp8b5	47
GO:0071166	ribonucleoprotein complex localization	13/1817	65/23174	0.00140816	0.0106884	0.00751469	Ddx39/Nup93/Eif6/Eif5a/Polr2d/Sdad1/Nol6/Zfp593/Ltv1/Ran/Ddx39b/Nxf7/Rrs1	13
GO:0097327	response to antineoplastic agent	14/1817	73/23174	0.00143826	0.0108515	0.00762934	Zc3h12a/Timeless/Tgfb1/Hmox1/Slc31a1/Atrx/Ddit4/Fibin/Eif4e/Pdgfb/Adam15/Arpc2/Cdh1/Nr3c1	14
GO:0016042	lipid catabolic process	39/1817	302/23174	0.00144155	0.0108578	0.00763374	Il1b/Mgll/Crabp1/Acox2/Cyp4f18/Tnf/Ces1f/Cyp1b1/Cidea/Enpp2/Plce1/Pla2g2d/Ivd/Lpl/Smpd3/Hcar2/Pnpla8/Ldlr/Acot8/Pnpla7/Pla2g7/Ehhadh/Lrp1/Gla/Pde3b/Ugt1a7c/Adipoq/Faah/Dbi/Plcg1/Acsl5/Ces1d/Plaat3/Hsd3b7/Adra2a/Lgals12/Cyp27a1/Lipg/Asah2	39
GO:0070586	cell-cell adhesion involved in gastrulation	5/1817	12/23174	0.0014611	0.0109397	0.00769131	Myadm/Tnfaip3/Il1rn/Adipoq/Mbp	5
GO:0110053	regulation of actin filament organization	34/1817	254/23174	0.00153954	0.0114107	0.0080225	Dbn1/Csf3/S100a10/Pfn1/Capzb/Id1/Lpar1/Ccl11/Cfl1/Myadm/Cdc42ep2/Pik3r1/Icam1/Eps8/Limch1/Plek/Sdc4/Sptbn1/Sh3pxd2b/Tacstd2/Arpc1b/Rac1/Vasp/Ccn2/Gm14137/Fhod3/Arpc2/Ppp1r9a/Slit2/Arhgap35/Limk1/Prkcq/Dlc1/Arfgef1	34
GO:0050890	cognition	41/1817	323/23174	0.00154092	0.0114114	0.00802296	Itga8/Ptgs2/Il1b/Hif1a/Sgk1/Itga5/Slc7a11/Cyp7b1/C5ar1/Ngf/Bdnf/Lgmn/Pten/Picalm/Il1rn/Tnr/Atxn1/Plk2/Chl1/Kat2a/Ntrk2/Ldlr/Adgrf1/Rin1/Srf/Fam107a/Hmgcr/Slc11a2/Pde1b/B4galt2/Dbi/Shroom4/Nipbl/Prkar2b/Arf4/Chrm1/Map1a/Pja2/Kmt2a/Kit/Atp1a2	41
GO:0198738	cell-cell signaling by wnt	51/1817	427/23174	0.00174807	0.0127211	0.00894378	Zfp703/Fbxw4/Sdc1/Jade1/Tcf7l2/Celsr3/Fgfr2/Myc/Lgr4/Pten/Amer1/Tnfaip3/Pkd1/Cpe/Nle1/Ccn4/Tnik/Sox9/Csnk2b/Prkaa2/Lrp1/Rnf213/Cd44/Cxxc4/Sfrp1/Lrp6/Tbl1x/Rac1/Adgra2/Ppp2r3a/Tsku/Dact2/Fermt1/Nrarp/Nkd2/Fzd1/G3bp1/Nphp4/Wnt5b/Cdh1/Gprc5b/Ilk/Ruvbl1/Sox10/Tle4/Ptpn23/Lrp4/Amotl1/Tnks/Mdfi/Wwtr1	51
GO:0007613	memory	22/1817	143/23174	0.00175031	0.0127269	0.00894785	Itga8/Ptgs2/Il1b/Sgk1/Itga5/Cyp7b1/Ngf/Bdnf/Lgmn/Pten/Il1rn/Atxn1/Plk2/Kat2a/Ntrk2/Ldlr/Adgrf1/Rin1/Srf/B4galt2/Map1a/Pja2	22
GO:0046683	response to organophosphorus	16/1817	91/23174	0.00178407	0.0128685	0.00904743	Il1b/Lpar1/Junb/Itpr1/Pik3r1/Itpr2/Pde2a/Adipoq/Kcnq1/Mat2a/Zfp36l1/Cited1/Igfbp5/Rap1b/P2rx7/Pde3a	16
GO:0098656	anion transmembrane transport	26/1817	180/23174	0.00180456	0.0128685	0.00904743	Slc16a3/Slc7a8/Slc38a3/Slc7a11/Slc7a1/Slc7a10/Tnf/Slc19a1/Myc/Emb/Slc7a5/Slc12a4/Slc38a1/Slc20a2/Mpc2/Thbs1/Acsl5/Arl6ip5/Tcaf1/Slc35b1/Per2/Slc7a7/Slc12a2/Ptafr/Abcc1/Slc26a2	26
GO:0001802	type III hypersensitivity	3/1817	4/23174	0.0018121	0.0128685	0.00904743	Fcer1g/Fcgr1/Fcgr3	3
GO:0001803	regulation of type III hypersensitivity	3/1817	4/23174	0.0018121	0.0128685	0.00904743	Fcer1g/Fcgr1/Fcgr3	3
GO:0001805	positive regulation of type III hypersensitivity	3/1817	4/23174	0.0018121	0.0128685	0.00904743	Fcer1g/Fcgr1/Fcgr3	3
GO:0046136	positive regulation of vitamin metabolic process	3/1817	4/23174	0.0018121	0.0128685	0.00904743	Il1b/Tnf/Rdh10	3
GO:0072719	cellular response to cisplatin	3/1817	4/23174	0.0018121	0.0128685	0.00904743	Timeless/Hmox1/Slc31a1	3
GO:2000589	regulation of metanephric mesenchymal cell migration	3/1817	4/23174	0.0018121	0.0128685	0.00904743	Pdgfa/Pdgfb/Adipoq	3
GO:0042092	type 2 immune response	9/1817	37/23174	0.00182134	0.0128896	0.00906229	Il4ra/Nlrp3/Ecm1/Arg2/Bcl3/Il6/Anxa1/Nod2/Crlf2	9
GO:0034976	response to endoplasmic reticulum stress	31/1817	229/23174	0.00202554	0.0140894	0.00990576	Ptpn1/Ero1l/Casp4/Itpr1/Pik3r1/P4hb/Ppp1r15a/Atf4/Bid/Cebpb/Syvn1/Trp53/Sec61b/Thbs1/Sdf2l1/Erp29/Selenos/Pmaip1/Gorasp2/Hyou1/Sgta/Opa1/Manf/Pdia4/Fbxo44/Nrros/Crebrf/Trib3/Stub1/Fcgr2b/Creb3l1	31
GO:0016485	protein processing	32/1817	239/23174	0.00207044	0.0143114	0.0100619	Chst8/Spon1/Il1r2/Il1b/Anxa2/Serpine1/Pcsk5/Ece1/Lgmn/Myc/Cpe/Srgn/Spcs3/Ogt/Glg1/Pcsk6/Birc3/Thbs1/Cd55/Ift172/Cpxm1/Ptch1/Nkd2/Cdh1/Tbc1d10a/Asprv1/Dhcr24/Ruvbl1/Serpine2/P2rx7/Rps6ka2/C2cd3	32
GO:0045667	regulation of osteoblast differentiation	22/1817	145/23174	0.00209556	0.0144285	0.0101442	Pdlim7/Areg/Id1/Noct/Tnf/Ccn4/Ccn1/Il6/Cebpb/Gja1/Sfrp1/Acvr1/Fbn2/Ddx5/Ptch1/Id3/Sema4d/Cited1/Igfbp5/Ilk/Cebpd/Lmna	22
GO:0031644	regulation of neurological system process	25/1817	173/23174	0.00217113	0.0147986	0.0104044	Dbn1/Mgll/Afdn/Ngfr/Tnf/Pten/Tnr/Nrg1/Il6/Nptxr/Itga2/Nptx1/Sh3gl1/Tnfrsf1b/Eif4a3/Edn1/Nos3/Ncmap/Nlgn2/Fabp5/Sox10/Gpr35/Cacnb3/Homer1/Ptafr	25
GO:0010755	regulation of plasminogen activation	5/1817	13/23174	0.00222176	0.0150011	0.0105468	Anxa2/Serpine1/Thbs1/Ruvbl1/Serpine2	5
GO:0009612	response to mechanical stimulus	25/1817	174/23174	0.00235104	0.015781	0.0110951	Tnf/Nfkbia/Ankrd1/Myc/Junb/Pkd1/Fos/Sox9/Cxcr4/Arhgdia/Itga2/Pde2a/Rac1/Thbs1/Atp2b2/Cradd/Nos3/Bag3/Serpine2/P2rx7/Cd36/Cacnb3/Kit/Slc12a2/Atp1a2	25
GO:0042698	ovulation cycle	12/1817	61/23174	0.00245433	0.0161954	0.0113865	Adamts1/Pgr/Esr1/Ptx3/Inhba/Pdgfra/Ereg/Enpp2/Anxa1/Nos3/Arrb2/Igf1r	12
GO:0002831	regulation of response to biotic stimulus	22/1817	147/23174	0.00249692	0.0164099	0.0115372	Cxcl1/Il1b/Zc3h12a/Acod1/Cxcl5/Tmem173/Il23a/Tnfaip3/Arg2/Pvr/Traf3ip2/Treml4/Nod2/Trim15/Trib1/Mill2/Trim6/Mif/Cactin/Dhx58/Cd84/Fgl2	22
GO:1905153	regulation of membrane invagination	6/1817	19/23174	0.00256142	0.0165872	0.0116619	Itga2/Fcgr1/Appl2/Pparg/Siglece/Cd36	6
GO:0051236	establishment of RNA localization	22/1817	148/23174	0.0027208	0.0174527	0.0122704	Zfp36/Ddx39/Nup93/Tst/Eif6/Eif5a/Polr2d/Igf2bp2/Sdad1/Nol6/Zfp593/Pom121/Ltv1/Zfp36l1/Ran/Ddx39b/Alyref/Khdrbs1/Nxf7/Rrs1/Nxt1/Tnks	22
GO:0120163	negative regulation of cold-induced thermogenesis	10/1817	47/23174	0.00302628	0.0192464	0.0135315	Rb1/Plcl1/Adamts5/Id1/Cidea/Lgr4/Atf4/Pgam5/Adam17/Adipoq	10
GO:0071826	ribonucleoprotein complex subunit organization	31/1817	235/23174	0.00302879	0.0192464	0.0135315	Noct/Rps2/Snrpd2/Mrpl20/Nle1/Ddx6/Grb7/Prkaa2/Eif6/Polr2d/Nip7/Ppan/Mrto4/Nop2/Bop1/Ddx28/Prmt5/G3bp1/Snrpb/Rsl24d1/Sf3a2/Ddx39b/Naf1/Clns1a/Ruvbl1/Snrpd1/Dync1h1/Eif2s2/Rpf2/Rrs1/Eif4b	31
GO:0050805	negative regulation of synaptic transmission	14/1817	79/23174	0.00311623	0.0197735	0.0139021	Ptgs2/Il1b/Mgll/Bdnf/Pten/Tnr/Gnai2/Plk2/Srf/Grik3/Adipoq/Ppp1r9a/Eif4a3/Rap1b	14
GO:0001678	cellular glucose homeostasis	23/1817	159/23174	0.00314747	0.0198858	0.0139811	Hif1a/Ngfr/Tcf7l2/Pik3r1/Ogt/Icam1/Prkaa2/Lrp1/Pde3b/Rac1/Hmgcr/Mpc2/Zbtb20/Dynll1/Pim3/Pik3ca/Hk3/Adra2a/Gpr39/Foxk1/Tra2b/Rab11fip5/Igf1r	23
GO:0048285	organelle fission	52/1817	450/23174	0.00318666	0.0201047	0.014135	Rb1/Osm/Esr1/Il1b/Marf1/Lif/Sphk1/Tnf/Bub3/Fgfr2/Ereg/Rcc1/Tubg1/Tgfb1/Numa1/Smpd3/Ube2s/Atrx/Acot8/Eps8/Nek6/Pex11a/Pdgfb/Mlh3/Inf2/Sycp2/Mfn1/Myo19/Nipbl/Cdkn1b/Cdk5rap2/Ran/Slx4/Cdt1/Tom1l1/Phip/Calr/Edn1/Chmp4b/Phb2/Cks2/Opa1/Klhl22/Chmp4c/Rps6ka2/Rrs1/Ranbp1/Tgfa/Pde3a/Tnks/Piwil2/Igf1r	52
GO:0010225	response to UV-C	5/1817	14/23174	0.00323453	0.020155	0.0141703	Map3k4/Impact/Bcl3/Trp53/Poli	5
GO:0030213	hyaluronan biosynthetic process	5/1817	14/23174	0.00323453	0.020155	0.0141703	Il1b/Tgfb1/Smpd3/Has2/Pdgfb	5
GO:0042362	fat-soluble vitamin biosynthetic process	5/1817	14/23174	0.00323453	0.020155	0.0141703	Il1b/Snai1/Tnf/Vdr/Cyp27a1	5
GO:0006024	glycosaminoglycan biosynthetic process	9/1817	40/23174	0.00323576	0.020155	0.0141703	Il1b/Chpf/Tgfb1/Smpd3/Has2/Pdgfb/Xylt1/B4galt7/Angpt1	9
GO:1903573	negative regulation of response to endoplasmic reticulum stress	9/1817	40/23174	0.00323576	0.020155	0.0141703	Ptpn1/Ppp1r15a/Syvn1/Selenos/Hyou1/Sgta/Opa1/Crebrf/Creb3l1	9
GO:0051607	defense response to virus	30/1817	227/23174	0.00340297	0.0210184	0.0147773	Nlrp3/Il1b/Zc3h12a/Ifitm2/Ifitm1/Ifitm6/Tmem173/Il23a/Oas2/Isg15/Oas3/Il6/Ddit4/Traf3ip2/Treml4/Ifitm3/Rnasel/Trim15/Ifit2/Mill2/G3bp1/Ddx21/Trim6/Oasl1/Dhx58/Gpam/Trim30a/Samhd1/Tlr3/Fgl2	30
GO:0002246	wound healing involved in inflammatory response	4/1817	9/23174	0.00344271	0.0211306	0.0148562	Timp1/Hif1a/Hmox1/Cd44	4
GO:0008354	germ cell migration	4/1817	9/23174	0.00344271	0.0211306	0.0148562	Tgfb1/Cxcr4/Foxc1/Kit	4
GO:0021891	olfactory bulb interneuron development	4/1817	9/23174	0.00344271	0.0211306	0.0148562	Rac1/Slit2/Robo2/Atf5	4
GO:1900125	regulation of hyaluronan biosynthetic process	4/1817	9/23174	0.00344271	0.0211306	0.0148562	Tgfb1/Smpd3/Has2/Pdgfb	4
GO:0030203	glycosaminoglycan metabolic process	14/1817	80/23174	0.00351055	0.0215171	0.015128	Il1b/Chpf/Tgfb1/Lyve1/Smpd3/Has2/Chst1/Cd44/Pdgfb/Xylt1/B4galt7/Foxc1/Angpt1/Itih4	14
GO:0120034	positive regulation of plasma membrane bounded cell projection assembly	17/1817	106/23174	0.0035826	0.0218675	0.0153743	Pfn1/Cfl1/Dnm3/Cdc42ep2/Eps8/Srf/Rac1/Gm14137/Dynll1/Arpc2/Ttbk2/Plek2/Arhgap35/Prkcq/P2rx7/Sept9/Kit	17
GO:0097755	positive regulation of blood vessel diameter	13/1817	72/23174	0.00364746	0.022248	0.0156419	Hif1a/Tnf/Sod2/Dusp5/Gja5/Adora2b/Gja1/Gucy1a1/Adra2a/G6pdx/Adm/Arhgap42/Ptafr	13
GO:0044282	small molecule catabolic process	38/1817	308/23174	0.00365937	0.0223052	0.0156821	Hdc/Bcat1/Crabp1/Acox2/Cyp4f18/Ces1f/Ddo/Pten/Arg2/Ivd/Tgfb1/Ppat/Hal/Ddah1/Ada/Upp1/Acot8/Ehhadh/Pcyox1/Cd44/Sord/Trp53/Renbp/Mat1a/Adipoq/Faah/Dbi/Npl/Acsl5/Aldh6a1/Ces1d/Inpp4b/Hsd3b7/Nos3/Cyp27a1/Pfkfb2/Foxk1/Tha1	38
GO:0007548	sex differentiation	36/1817	288/23174	0.00370544	0.0225103	0.0158263	Adamts1/Pgr/Esr1/Tiparp/Serpine1/Ncoa3/Ptx3/Inhba/Pdgfra/Tcf7l2/Ereg/Lgr4/Ercc1/Atrx/Hoxa9/Cntfr/Sox9/Icam1/Arid4b/Cebpb/Gja1/Sfrp1/Lrp6/Sycp2/Nipbl/Nos3/Dach1/Fndc3a/Foxc1/Dhcr24/Wdr19/Eif2s2/Angpt1/Arrb2/Kit/Rdh10	36
GO:0016311	dephosphorylation	43/1817	361/23174	0.00401504	0.0240575	0.016914	Ptpn1/Ptpn5/Dusp1/Marf1/Dusp6/Phlpp1/Tnf/Vcan/Ppp1r26/Pten/Dusp5/Tgfb1/Ephx2/Gnai2/Ppp1r15a/Chp2/Spred1/Plek/Itga2/Dusp4/Ripk3/Ppp2r3a/Ptpn14/Rrp1b/Dlg3/Inpp4b/Plpp1/Rprd1a/Cry2/Dusp10/Plpp5/Ptprf/Cnst/Ptprg/Sfi1/Sema4d/Ptpn23/Ppm1g/Ubash3b/Dlc1/Ptpn12/Cmya5/Ptpn4	43
GO:0061900	glial cell activation	10/1817	49/23174	0.0041634	0.0248452	0.0174678	Il1b/Mmp8/Fpr2/Sphk1/C5ar1/Tnf/Ldlr/Lrp1/Pparg/Tlr3	10
GO:0002901	mature B cell apoptotic process	3/1817	5/23174	0.00426534	0.0250432	0.0176071	Ada/Cd44/Mif	3
GO:0002905	regulation of mature B cell apoptotic process	3/1817	5/23174	0.00426534	0.0250432	0.0176071	Ada/Cd44/Mif	3
GO:0002906	negative regulation of mature B cell apoptotic process	3/1817	5/23174	0.00426534	0.0250432	0.0176071	Ada/Cd44/Mif	3
GO:0032364	oxygen homeostasis	3/1817	5/23174	0.00426534	0.0250432	0.0176071	Hif1a/Sod2/Egln1	3
GO:0072718	response to cisplatin	3/1817	5/23174	0.00426534	0.0250432	0.0176071	Timeless/Hmox1/Slc31a1	3
GO:0090245	axis elongation involved in somitogenesis	3/1817	5/23174	0.00426534	0.0250432	0.0176071	Sfrp1/Lrp6/Ppp2r3a	3
GO:0051893	regulation of focal adhesion assembly	11/1817	57/23174	0.00427324	0.0250432	0.0176071	S100a10/Cfl1/Coro1c/Enpp2/Pten/Limch1/Sdc4/Lrp1/Fam107a/Rac1/Dlc1	11
GO:0016054	organic acid catabolic process	28/1817	211/23174	0.00429711	0.025093	0.0176421	Hdc/Bcat1/Crabp1/Acox2/Cyp4f18/Ces1f/Ddo/Arg2/Ivd/Tgfb1/Ppat/Hal/Ddah1/Acot8/Ehhadh/Pcyox1/Cd44/Renbp/Mat1a/Adipoq/Faah/Dbi/Npl/Acsl5/Aldh6a1/Ces1d/Nos3/Tha1	28
GO:0046395	carboxylic acid catabolic process	28/1817	211/23174	0.00429711	0.025093	0.0176421	Hdc/Bcat1/Crabp1/Acox2/Cyp4f18/Ces1f/Ddo/Arg2/Ivd/Tgfb1/Ppat/Hal/Ddah1/Acot8/Ehhadh/Pcyox1/Cd44/Renbp/Mat1a/Adipoq/Faah/Dbi/Npl/Acsl5/Aldh6a1/Ces1d/Nos3/Tha1	28
GO:0009266	response to temperature stimulus	23/1817	163/23174	0.00430932	0.0251211	0.0176618	Osm/Il1r1/Ngfr/Hspa4/Dio2/Ccl2/Hmox1/Metrnl/Cxcr4/Trpm2/Pde4b/Polr2d/Plac8/Slc27a1/Xylt1/Appl2/Hsf4/Mill2/Ucp3/Trpv4/Bag3/Arrb2/Stub1	23
GO:0071248	cellular response to metal ion	22/1817	154/23174	0.00444895	0.0258667	0.018186	Mt2/Syt9/Alox5ap/Lgmn/Junb/Hmox1/Smpd3/Mmp9/Fos/Chp2/Slc25a24/Prkaa2/Trpm2/Ppif/Fosb/Scn5a/Nptx1/Pparg/Cdkn1b/Cdh1/Clic4/Gpr39	22
GO:1905155	positive regulation of membrane invagination	5/1817	15/23174	0.00454147	0.026112	0.0183585	Itga2/Fcgr1/Appl2/Pparg/Cd36	5
GO:0061351	neural precursor cell proliferation	25/1817	183/23174	0.00462094	0.026523	0.0186475	Lyn/Il1b/Hif1a/Dbn1/Afdn/Ngfr/Kctd11/C5ar1/Bdnf/Fgfr2/Rora/Tgfb1/Gnai2/Cxcr4/Rere/Trp53/Lrp6/Ccr5/Appl2/Prox1/Lims2/Ilk/Sox10/Atf5/Kif3a	25
GO:1905897	regulation of response to endoplasmic reticulum stress	13/1817	74/23174	0.00465422	0.0266214	0.0187166	Ptpn1/Pik3r1/Ppp1r15a/Syvn1/Erp29/Selenos/Hyou1/Sgta/Opa1/Manf/Crebrf/Fcgr2b/Creb3l1	13
GO:0021700	developmental maturation	37/1817	303/23174	0.00484829	0.0275884	0.0193965	Rb1/Ret/Pgr/Hif1a/Pfn1/B4galt5/Ngf/Ereg/Pten/Picalm/Rnd1/Gpat4/Ywhaz/Gja1/Hes1/Klf2/Rere/Nr4a2/Pdgfb/Bcl11a/Rac1/Xylt1/Cd63/Pparg/Fermt1/Rab32/Ccr6/G6pdx/Opa1/Sema4d/Plp1/Erbb4/Sox10/Rps6ka2/Cbfb/Pde3a/Shb	37
GO:0032409	regulation of transporter activity	33/1817	263/23174	0.00499343	0.0281239	0.019773	Actb/Fxyd3/Cfl1/Fxyd5/Dapk1/Nedd4/Pten/Kcnc2/Ehd3/Mmp9/Cacnb4/Gja1/Pde4b/Ppif/Cacnb1/Plcg1/Kcnq1/Klhl24/Stoml1/Tcaf1/Rem2/Phb2/Nlgn2/Alox5/Kmt2a/Cbarp/Slmap/Gpr35/Cacnb3/Homer1/Ptafr/Dysf/Atp1a2	33
GO:0051302	regulation of cell division	22/1817	156/23174	0.00519678	0.0291947	0.0205258	Klhl13/Il1b/Plk3/Ncoa3/Fgfr2/Myc/Ereg/Pkp4/Sfn/Tgfb1/Plk2/Pdgfa/Birc6/Pdgfb/Myo19/Pik3r4/Ptch1/Chmp4c/Ybx1/Cdk2ap2/Tgfa/Igf1r	22
GO:0110020	regulation of actomyosin structure organization	16/1817	101/23174	0.00523534	0.0293179	0.0206125	S100a10/Pfn1/Lpar1/Pik3r1/Limch1/Sdc4/Sh3pxd2b/Tacstd2/Rac1/Ccn2/Prox1/Ppp1r9a/Edn1/Limk1/Prkcq/Dlc1	16
GO:0110110	positive regulation of animal organ morphogenesis	16/1817	101/23174	0.00523534	0.0293179	0.0206125	Csf1/Lif/Ngfr/Pdgfra/Fgfr2/Myc/Lgr4/Itpr1/Tnfaip3/Tgfb1/Sox9/Vdr/Pim1/Acvr1/Edn1/Robo2	16
GO:0046543	development of secondary female sexual characteristics	4/1817	10/23174	0.00538375	0.0298083	0.0209573	Areg/Ncoa3/Tgfb1/Phb2	4
GO:0051775	response to redox state	4/1817	10/23174	0.00538375	0.0298083	0.0209573	Slc7a11/Smpd3/Vasn/Selenos	4
GO:0140052	cellular response to oxidised low-density lipoprotein particle stimulus	4/1817	10/23174	0.00538375	0.0298083	0.0209573	Smpd3/Myd88/Cd68/Cd36	4
GO:1905522	negative regulation of macrophage migration	4/1817	10/23174	0.00538375	0.0298083	0.0209573	Cd200/Emilin1/Cd200r1/Mif	4
GO:2000303	regulation of ceramide biosynthetic process	4/1817	10/23174	0.00538375	0.0298083	0.0209573	Sphk1/Smpd3/Ccn1/Samd8	4
GO:0034103	regulation of tissue remodeling	14/1817	84/23174	0.00551448	0.0304176	0.0213856	Adam8/Vdr/Il6/Gja1/Sfrp1/Trp53/Lrp6/Tnfrsf11b/Inpp4b/Ltbp3/Tmbim1/Tnfrsf11a/P2rx7/Ubash3b	14
GO:0001570	vasculogenesis	15/1817	93/23174	0.0056859	0.0312849	0.0219954	Tiparp/Epha2/Fgfr2/Junb/Tgfb1/Has2/Rasip1/Ntrk2/Spred1/Prok2/Zfp36l1/Adm/Cited1/Angpt1/Itgb8	15
GO:0099170	postsynaptic modulation of chemical synaptic transmission	6/1817	22/23174	0.00574837	0.0313741	0.0220581	Nedd4/Csnk2b/Egln1/Eif4e/Eif4a3/Cdh1	6
GO:0101023	vascular endothelial cell proliferation	6/1817	22/23174	0.00574837	0.0313741	0.0220581	Adam17/Plcg1/Flt1/Pparg/Ccl12/Akt3	6
GO:1905562	regulation of vascular endothelial cell proliferation	6/1817	22/23174	0.00574837	0.0313741	0.0220581	Adam17/Plcg1/Flt1/Pparg/Ccl12/Akt3	6
GO:0050886	endocrine process	16/1817	102/23174	0.00576874	0.0314464	0.0221089	Il1b/Lif/Inhba/Ece1/Hcar2/Gja5/Rab8b/C1qtnf1/Cry2/G6pdx/Edn1/Nos3/Mif/Rab11fip1/Rps6ka2/Rab11fip5	16
GO:1905477	positive regulation of protein localization to membrane	16/1817	102/23174	0.00576874	0.0314464	0.0221089	Epha2/Rhog/Tnf/Ccl2/Tgfb1/Sptbn1/Lrp1/Arpc2/Pmaip1/Tcaf1/Nkd2/Cnst/Nlgn2/Lgals3/Lrp4/Cacnb3	16
GO:0071398	cellular response to fatty acid	8/1817	36/23174	0.0058473	0.0317569	0.0223272	Zc3h12a/Lpl/Pid1/Ldlr/Prkaa2/Adcy6/Id3/Ranbp1	8
GO:1905209	positive regulation of cardiocyte differentiation	8/1817	36/23174	0.0058473	0.0317569	0.0223272	Tgfb1/Nrg1/Ccn4/Kat2a/Ddx39b/Nr3c1/Edn1/Arrb2	8
GO:0002266	follicular dendritic cell activation	2/1817	2/23174	0.00614451	0.0320664	0.0225448	Bcl3/Nfkb2	2
GO:0002268	follicular dendritic cell differentiation	2/1817	2/23174	0.00614451	0.0320664	0.0225448	Bcl3/Nfkb2	2
GO:0007538	primary sex determination	2/1817	2/23174	0.00614451	0.0320664	0.0225448	Map3k4/Sox9	2
GO:0007542	primary sex determination, germ-line	2/1817	2/23174	0.00614451	0.0320664	0.0225448	Map3k4/Sox9	2
GO:0010645	regulation of cell communication by chemical coupling	2/1817	2/23174	0.00614451	0.0320664	0.0225448	Gja5/Gja1	2
GO:0010652	positive regulation of cell communication by chemical coupling	2/1817	2/23174	0.00614451	0.0320664	0.0225448	Gja5/Gja1	2
GO:0015679	plasma membrane copper ion transport	2/1817	2/23174	0.00614451	0.0320664	0.0225448	Slc31a1/Slc11a2	2
GO:0019100	male germ-line sex determination	2/1817	2/23174	0.00614451	0.0320664	0.0225448	Map3k4/Sox9	2
GO:0021997	neural plate axis specification	2/1817	2/23174	0.00614451	0.0320664	0.0225448	Ptch1/C2cd3	2
GO:0034775	glutathione transmembrane transport	2/1817	2/23174	0.00614451	0.0320664	0.0225448	Slc7a11/Abcc1	2
GO:0035443	tripeptide transmembrane transport	2/1817	2/23174	0.00614451	0.0320664	0.0225448	Slc7a11/Abcc1	2
GO:0042404	thyroid hormone catabolic process	2/1817	2/23174	0.00614451	0.0320664	0.0225448	Dio3/Dio2	2
GO:0045977	positive regulation of mitotic cell cycle, embryonic	2/1817	2/23174	0.00614451	0.0320664	0.0225448	Hes1/Pdgfb	2
GO:0071163	DNA replication preinitiation complex assembly	2/1817	2/23174	0.00614451	0.0320664	0.0225448	Cdt1/Cdc45	2
GO:0098705	copper ion import across plasma membrane	2/1817	2/23174	0.00614451	0.0320664	0.0225448	Slc31a1/Slc11a2	2
GO:0099403	maintenance of mitotic sister chromatid cohesion, telomeric	2/1817	2/23174	0.00614451	0.0320664	0.0225448	Atrx/Tnks	2
GO:0099404	mitotic sister chromatid cohesion, telomeric	2/1817	2/23174	0.00614451	0.0320664	0.0225448	Atrx/Tnks	2
GO:0099551	trans-synaptic signaling by neuropeptide, modulating synaptic transmission	2/1817	2/23174	0.00614451	0.0320664	0.0225448	Bdnf/Ntrk2	2
GO:1900241	positive regulation of phenotypic switching	2/1817	2/23174	0.00614451	0.0320664	0.0225448	Sod2/Pdgfb	2
GO:1901344	response to leptomycin B	2/1817	2/23174	0.00614451	0.0320664	0.0225448	Id3/Ranbp1	2
GO:1904907	regulation of maintenance of mitotic sister chromatid cohesion, telomeric	2/1817	2/23174	0.00614451	0.0320664	0.0225448	Atrx/Tnks	2
GO:1904908	negative regulation of maintenance of mitotic sister chromatid cohesion, telomeric	2/1817	2/23174	0.00614451	0.0320664	0.0225448	Atrx/Tnks	2
GO:1905167	positive regulation of lysosomal protein catabolic process	2/1817	2/23174	0.00614451	0.0320664	0.0225448	Ldlr/Lrp1	2
GO:1905371	ceramide phosphoethanolamine metabolic process	2/1817	2/23174	0.00614451	0.0320664	0.0225448	Sgms2/Samd8	2
GO:1905373	ceramide phosphoethanolamine biosynthetic process	2/1817	2/23174	0.00614451	0.0320664	0.0225448	Sgms2/Samd8	2
GO:1905581	positive regulation of low-density lipoprotein particle clearance	2/1817	2/23174	0.00614451	0.0320664	0.0225448	Anxa2/Ldlrap1	2
GO:1905602	positive regulation of receptor-mediated endocytosis involved in cholesterol transport	2/1817	2/23174	0.00614451	0.0320664	0.0225448	Anxa2/Ldlrap1	2
GO:1905704	positive regulation of inhibitory synapse assembly	2/1817	2/23174	0.00614451	0.0320664	0.0225448	Sema4a/Sema4d	2
GO:2000814	positive regulation of barbed-end actin filament capping	2/1817	2/23174	0.00614451	0.0320664	0.0225448	Cfl1/Arpc2	2
GO:0055117	regulation of cardiac muscle contraction	12/1817	68/23174	0.0061807	0.0320664	0.0225448	Zc3h12a/Ehd3/Stc1/Gja5/Pde4b/Scn5a/Ccn2/Kcnq1/Kcnj2/Dsp/Tmem38b/Atp1a2	12
GO:0036315	cellular response to sterol	5/1817	16/23174	0.00618423	0.0320664	0.0225448	Inhba/Rora/Lrp6/Ptch1/Rorc	5
GO:0051852	disruption by host of symbiont cells	5/1817	16/23174	0.00618423	0.0320664	0.0225448	Cxcl1/Trem1/Cxcl5/Trem3/Pf4	5
GO:0051873	killing by host of symbiont cells	5/1817	16/23174	0.00618423	0.0320664	0.0225448	Cxcl1/Trem1/Cxcl5/Trem3/Pf4	5
GO:2000647	negative regulation of stem cell proliferation	5/1817	16/23174	0.00618423	0.0320664	0.0225448	Kctd11/Bdnf/Tgfb1/Trp53/Fermt1	5
GO:0009101	glycoprotein biosynthetic process	34/1817	277/23174	0.00621108	0.0321678	0.0226161	Chst8/Gcnt2/Ramp1/Hbegf/B4galt5/Fut9/Tcf7l2/Chpf/Phlda1/Tet1/Itm2b/Ogt/Fut8/Tnip1/Acot8/Syvn1/Tmem106a/St6galnac2/Xylt1/Gfpt2/Rpn1/Sdf2l1/Dpy19l4/Hs3st3b1/St6galnac4/Soat1/Large2/Tmtc4/B4galt7/Ggta1/Gcnt1/Fktn/Arfgef1/Pofut2	34
GO:0046717	acid secretion	18/1817	121/23174	0.00625548	0.0323598	0.0227511	Il1b/Bdnf/Cyp4f18/Myc/Pla2g2d/Il1rn/Pnpla8/Abcc4/Cacnb4/Ntrk2/Anxa1/Kcnq1/Tnfrsf11a/Nr3c1/Edn1/Mif/P2rx7/Gpr39	18
GO:0015893	drug transport	27/1817	207/23174	0.00627391	0.032436	0.0228047	Slc7a11/Slc7a1/Inhba/Syt9/Slc11a1/Slc7a10/Tnf/Slc6a2/Abcg2/Slc19a1/Arg2/Smpd3/Car4/Abcc4/Slc31a1/Cldn1/Slc25a24/Nfkbie/Gja1/Atp8b1/Arl6ip5/Entpd1/Per2/Slc35f3/Slc4a11/Edn1/Abcc1	27
GO:0007009	plasma membrane organization	16/1817	103/23174	0.00634528	0.0326519	0.0229565	Ndrg1/S100a9/Cavin2/Pten/Cxcr4/Sptbn1/Xkr4/Snx33/Mtss2/Asap1/Col5a1/Mpp5/P2rx7/A4galt/Plscr4/Dysf	16
GO:1903522	regulation of blood circulation	30/1817	237/23174	0.00634992	0.0326568	0.0229599	Ptgs2/Hif1a/Hbegf/Zc3h12a/Pik3r1/Ehd3/Dusp5/Thrb/Ada/Stc1/Gja5/Icam1/Map2k1/Gja1/Pde4b/Pdgfb/Scn5a/Ccn2/Kcnq1/Kcnj2/Dsp/Per2/Tmem38b/Edn1/Adm/Nos3/Alox5/Arhgap42/Ptafr/Atp1a2	30
GO:0071322	cellular response to carbohydrate stimulus	21/1817	150/23174	0.00676821	0.0346062	0.0243305	Hif1a/Tcf7l2/Ogt/Icam1/Prkaa2/Lrp1/Pde3b/Rac1/Hmgcr/Mpc2/Zbtb20/Dynll1/Pim3/Zfp36l1/Pik3ca/Adra2a/Rps6ka2/Gpr39/Tra2b/Rab11fip5/Igf1r	21
GO:0010921	regulation of phosphatase activity	18/1817	122/23174	0.00681467	0.034704	0.0243993	Marf1/Tnf/Vcan/Ppp1r26/Gnai2/Ppp1r15a/Chp2/Spred1/Plek/Itga2/Ripk3/Rrp1b/Dlg3/Cry2/Cnst/Sfi1/Sema4d/Cmya5	18
GO:0042752	regulation of circadian rhythm	18/1817	122/23174	0.00681467	0.034704	0.0243993	Phlpp1/Timeless/Noct/Arntl2/Per3/Rora/Nr1d2/Ada/Il6/Prkaa2/Trp53/Cipc/Pparg/Prox1/Cry2/Per2/Piwil2/Rorc	18
GO:0055072	iron ion homeostasis	14/1817	86/23174	0.00681489	0.034704	0.0243993	Hif1a/Slc11a1/Hephl1/Sod2/Myc/Picalm/Neo1/Hmox1/Steap4/Egln1/Fbxl5/Ccdc115/Slc11a2/Hpx	14
GO:0043244	regulation of protein complex disassembly	17/1817	113/23174	0.00692037	0.0351683	0.0247257	Capzb/Cfl1/Tnf/Eps8/Plek/Eif5a/Sptbn1/Map1b/Arpc2/Ttbk2/Per2/Rubcn/Fyco1/Trpv4/Map1a/Dysf/Igf1r	17
GO:0035743	CD4-positive, alpha-beta T cell cytokine production	6/1817	23/23174	0.0072696	0.0365344	0.0256861	Nlrp3/Il1b/Il1r1/Il18rap/Il6/Crlf2	6
GO:0010464	regulation of mesenchymal cell proliferation	9/1817	45/23174	0.00736627	0.036748	0.0258363	Fbxw4/Nfib/Fgfr2/Myc/Sox9/Pdgfa/Lrp6/Prrx2/Lmna	9
GO:0050974	detection of mechanical stimulus involved in sensory perception	9/1817	45/23174	0.00736627	0.036748	0.0258363	Tnf/Myc/Cxcr4/Itga2/Atp2b2/Serpine2/Cacnb3/Kit/Slc12a2	9
GO:0061647	histone H3-K9 modification	9/1817	45/23174	0.00736627	0.036748	0.0258363	Setd7/Atrx/Arid4b/Airn/Prdm5/Myb/Kmt2a/Lmna/Piwil2	9
GO:0048312	intracellular distribution of mitochondria	4/1817	11/23174	0.00793963	0.0389124	0.0273581	Ogt/Kat2a/Mfn1/Opa1	4
GO:1905038	regulation of membrane lipid metabolic process	4/1817	11/23174	0.00793963	0.0389124	0.0273581	Sphk1/Smpd3/Ccn1/Samd8	4
GO:1905288	vascular associated smooth muscle cell apoptotic process	4/1817	11/23174	0.00793963	0.0389124	0.0273581	Pdcd4/Sod2/Atf4/Pparg	4
GO:1905459	regulation of vascular associated smooth muscle cell apoptotic process	4/1817	11/23174	0.00793963	0.0389124	0.0273581	Pdcd4/Sod2/Atf4/Pparg	4
GO:0010757	negative regulation of plasminogen activation	3/1817	6/23174	0.00803396	0.0389124	0.0273581	Serpine1/Thbs1/Serpine2	3
GO:0034638	phosphatidylcholine catabolic process	3/1817	6/23174	0.00803396	0.0389124	0.0273581	Enpp2/Pnpla8/Ldlr	3
GO:0044362	negative regulation of molecular function in other organism	3/1817	6/23174	0.00803396	0.0389124	0.0273581	Sftpd/Anxa2/Ptx3	3
GO:0052204	negative regulation of molecular function in other organism involved in symbiotic interaction	3/1817	6/23174	0.00803396	0.0389124	0.0273581	Sftpd/Anxa2/Ptx3	3
GO:0052405	negative regulation by host of symbiont molecular function	3/1817	6/23174	0.00803396	0.0389124	0.0273581	Sftpd/Anxa2/Ptx3	3
GO:0071494	cellular response to UV-C	3/1817	6/23174	0.00803396	0.0389124	0.0273581	Impact/Trp53/Poli	3
GO:0099576	regulation of protein catabolic process at postsynapse, modulating synaptic transmission	3/1817	6/23174	0.00803396	0.0389124	0.0273581	Nedd4/Egln1/Cdh1	3
GO:1905563	negative regulation of vascular endothelial cell proliferation	3/1817	6/23174	0.00803396	0.0389124	0.0273581	Flt1/Pparg/Ccl12	3
GO:0010867	positive regulation of triglyceride biosynthetic process	5/1817	17/23174	0.00820318	0.0393763	0.0276842	Tcf7l2/Ldlr/Slc27a1/Acsl5/Gpam	5
GO:1905331	negative regulation of morphogenesis of an epithelium	5/1817	17/23174	0.00820318	0.0393763	0.0276842	Tnf/Pten/Tacstd2/Lrp6/Cited1	5
GO:0006826	iron ion transport	8/1817	38/23174	0.00822056	0.0393763	0.0276842	Slc11a1/Hephl1/Steap4/Arhgap1/Myo1b/Slc11a2/Timd2/Slc25a37	8
GO:0060840	artery development	16/1817	106/23174	0.00835856	0.039958	0.0280931	Ngfr/Gja5/Adgrf5/Ldlr/Cxcr4/Adamts9/Srf/Lrp1/Hes1/Pde2a/Prox1/Prrx2/Foxc1/Robo2/Ephb4/Akt3	16
GO:0044060	regulation of endocrine process	10/1817	54/23174	0.00849304	0.0404038	0.0284066	Il1b/Lif/Inhba/Hcar2/Gja5/Rab8b/C1qtnf1/Cry2/Rab11fip1/Rab11fip5	10
GO:0070266	necroptotic process	7/1817	31/23174	0.00888336	0.0419439	0.0294894	Tnf/Pgam5/Birc3/Ripk3/Ppif/Trp53/Tlr3	7
GO:0030728	ovulation	6/1817	24/23174	0.00906134	0.0426473	0.0299839	Adamts1/Pgr/Ptgs2/Inhba/Ereg/Nos3	6
GO:0003014	renal system process	16/1817	107/23174	0.00913273	0.0429374	0.0301879	Cldn4/Lgmn/Gnai2/Stc1/Gja5/Adgrf5/Gja1/Pdgfb/Aqp7/Adipoq/Kcnq1/Adcy6/G6pdx/Edn1/Adm/Rrm2b	16
GO:0031623	receptor internalization	18/1817	126/23174	0.00946982	0.0442393	0.0311032	Ptpn5/Ramp1/Cxcr2/Nedd4/Dnm3/Picalm/Sele/Fcer1g/Cd63/Adm/Nsf/Ophn1/Ankrd13d/Ldlrap1/Cd36/Angpt1/Arrb2/Itgb2	18
GO:1903018	regulation of glycoprotein metabolic process	9/1817	47/23174	0.00984042	0.0458008	0.032201	Ramp1/Hbegf/Ptx3/Tcf7l2/Itm2b/Acot8/Soat1/Fktn/Arfgef1	9
GO:0106027	neuron projection organization	15/1817	99/23174	0.0101045	0.0468321	0.0329261	Dbn1/Afdn/Cfl1/Lgmn/Srcin1/Dnm3/Pten/Mfn1/Ppp1r9a/Opa1/Map1a/Prmt3/Homer1/Fcgr2b/Igf1r	15
GO:0016486	peptide hormone processing	5/1817	18/23174	0.0106368	0.0487611	0.0342823	Chst8/Pcsk5/Ece1/Cpe/Pcsk6	5
