# Supplementary material for: Estrogen exacerbates mammary involution through neutrophil-dependent and -independent mechanism
Source: eLife journal article supplement (doi:10.7554/elife.57274), 2020-07-24
Supplement: supp [file elife-57274-supp-v1.zip › elife_poa_e57274_Figure_2_source_data_6.xlsx]

## Sheet: ego2_E2B_CTRL_LY6G_SIMPLIFY
ID	Description	GeneRatio	BgRatio	pvalue	p.adjust	qvalue	geneID	Count
GO:0030198	extracellular matrix organization	26/509	273/23174	4.26054e-10	2.32114e-06	1.7531e-06	Pdgfra/Qsox1/Plod1/Plod2/Fbln2/Rb1/Ero1l/Eln/App/Adamts2/Col5a1/Loxl2/Itgb3/Idua/Lox/Hspg2/Itga8/Col8a2/Tgfb2/Rxfp1/Adamtsl2/Tgfbr1/P3h1/Lamc1/Nf1/Flrt2	26
GO:0048638	regulation of developmental growth	29/509	399/23174	2.13922e-08	2.91362e-05	2.20058e-05	Socs2/Sema4a/Sema3g/Dbn1/App/Trim46/Erbb4/Wnt5a/Stat5a/Ahr/Nedd4l/Stc2/Mgll/Cited2/Afdn/Lep/P2rx5/Ptprs/Tgfbr1/Rgma/Rai1/G6pdx/Trip10/Pik3ca/Ncam1/Gpat4/Tcf7l2/Dio3/Gsk3b	29
GO:0045666	positive regulation of neuron differentiation	31/509	458/23174	3.59351e-08	3.39294e-05	2.5626e-05	Mmd2/Socs2/Ptpn5/Ret/Lyn/Lpar1/Dbn1/Itga6/Pax6/Plxna1/Wnt5a/Ntrk2/Tiam1/Ngfr/Nedd4l/Camk1d/Scarb2/Retreg3/Afdn/Grn/Impact/Palm/P3h1/Dmd/Rgma/Trak1/Irx3/Robo1/Nf1/Gsk3b/Ptprz1	31
GO:0010769	regulation of cell morphogenesis involved in differentiation	26/509	338/23174	3.73672e-08	3.39294e-05	2.5626e-05	Ret/Sema4a/Sema3g/Dbn1/Trim46/Plxna1/Wnt5a/Ntrk2/Nedd4/Myadm/Calr/Tiam1/Itgb3/Nedd4l/Mgll/Afdn/Ptprs/Vim/Rgma/Trak1/Prex1/Robo1/Gsk3b/Dnm3/Ptprz1/Zswim6	26
GO:0007409	axonogenesis	31/509	466/23174	5.31989e-08	4.14039e-05	3.12713e-05	Ret/Cdh11/Sema4a/Sema3g/Dbn1/App/Pax6/Ephb6/Trim46/Plxna1/Map1a/Wnt5a/Ntrk2/Tiam1/Ngfr/Mgll/Tgfb2/Ptprs/Adcy1/Pitpna/Erbb2/Vim/Rgma/Trak1/Ncam1/Klf7/Robo1/Flrt2/Gsk3b/Ptprz1/Zswim6	31
GO:0048762	mesenchymal cell differentiation	20/509	216/23174	7.16155e-08	4.34889e-05	3.2846e-05	Zfp703/Ret/Pdcd4/Sema4a/Osr1/Sema3g/Pax6/Loxl2/Erbb4/Wnt5a/Bcl9l/Sox10/Tiam1/Cited2/Tgfb2/Tgfbr1/Snai2/Trip10/Kitl/Gsk3b	20
GO:0061448	connective tissue development	23/509	282/23174	7.97987e-08	4.34889e-05	3.2846e-05	Osr1/Col5a1/Loxl2/Wnt5a/Itgb3/Col6a1/Col6a2/Idua/Lox/Hspg2/Col7a1/Tgfb2/Lep/Rxfp1/Pkd1/Tgfbr1/Snai2/Fbxw4/Pik3ca/Bmp1/Ltbp3/Klf7/Col6a3	23
GO:0050673	epithelial cell proliferation	29/509	424/23174	7.98254e-08	4.34889e-05	3.2846e-05	Zfp703/Pgr/C5ar2/Rb1/Osr1/Flt4/Pax6/Loxl2/Erbb4/Wnt5a/Stat5a/Tgm1/Ngfr/Itgb3/Stxbp4/Esr1/Grn/Col8a2/Tgfb2/Lep/Htra1/Tgfbr1/Areg/Snai2/Erbb2/Jun/Robo1/Tcf7l2/Nf1	29
GO:0050678	regulation of epithelial cell proliferation	26/509	357/23174	1.11085e-07	5.10628e-05	3.85665e-05	Zfp703/Pgr/C5ar2/Rb1/Osr1/Flt4/Pax6/Erbb4/Wnt5a/Stat5a/Tgm1/Ngfr/Itgb3/Stxbp4/Esr1/Grn/Tgfb2/Lep/Htra1/Tgfbr1/Snai2/Erbb2/Jun/Robo1/Tcf7l2/Nf1	26
GO:0090287	regulation of cellular response to growth factor stimulus	22/509	267/23174	1.27864e-07	5.10628e-05	3.85665e-05	Zfp703/Rasl11b/Wnt5a/Bcl9l/Numa1/Nedd4/Ngfr/Lox/Cited2/Itga8/Ptpn1/Htra1/Fbn1/Adamtsl2/Peg10/Cd63/Dmd/Rgma/Trim33/Aspn/Robo1/Tcf7l2	22
GO:0071560	cellular response to transforming growth factor beta stimulus	19/509	204/23174	1.38472e-07	5.10628e-05	3.85665e-05	Zfp703/Dbn1/Rasl11b/Bcl9l/Lox/Cited2/Itga8/Tgfb2/Htra1/Fbn1/Adamtsl2/Tgfbr1/Peg10/Dnmt1/Trim33/Aspn/Ltbp3/Jun/Ltbp4	19
GO:0007179	transforming growth factor beta receptor signaling pathway	17/509	165/23174	1.47932e-07	5.10628e-05	3.85665e-05	Zfp703/Rasl11b/Bcl9l/Lox/Cited2/Itga8/Tgfb2/Htra1/Fbn1/Adamtsl2/Tgfbr1/Peg10/Trim33/Aspn/Ltbp3/Jun/Ltbp4	17
GO:0071559	response to transforming growth factor beta	19/509	208/23174	1.87891e-07	5.38753e-05	4.06906e-05	Zfp703/Dbn1/Rasl11b/Bcl9l/Lox/Cited2/Itga8/Tgfb2/Htra1/Fbn1/Adamtsl2/Tgfbr1/Peg10/Dnmt1/Trim33/Aspn/Ltbp3/Jun/Ltbp4	19
GO:0001667	ameboidal-type cell migration	27/509	406/23174	3.9134e-07	9.69101e-05	7.31937e-05	Ret/Sema4a/Sema3g/Csnk2b/Flt4/Pax6/Alox12/Loxl2/Erbb4/Wnt5a/Pik3c2a/Stat5a/Sox10/Calr/Itgb3/Pkn3/Grn/Tgfb2/Tgfbr1/Cd63/Amot/Snai2/Jun/Kitl/Robo1/Nf1/Gna12	27
GO:0031346	positive regulation of cell projection organization	29/509	464/23174	5.2684e-07	0.000124792	9.42525e-05	Ptpn5/Ret/Lyn/Lpar1/Dbn1/Itga6/Plxna1/Eps8l2/Wnt5a/Ntrk2/Tiam1/Ngfr/Nedd4l/Camk1d/Scarb2/Retreg3/Afdn/Grn/Palm/Tgfbr1/P3h1/Dmd/Rgma/Trak1/Robo1/Nf1/Gsk3b/Dnm3/Ptprz1	29
GO:0002761	regulation of myeloid leukocyte differentiation	14/509	125/23174	6.71988e-07	0.000152541	0.000115211	Lyn/Rb1/Pik3r1/Rbp1/Stat5a/Itgb3/Traf6/Fbn1/Prxl2a/Jun/Kitl/Lrrc17/Nf1/Gsk3b	14
GO:0048511	rhythmic process	21/509	289/23174	1.91843e-06	0.000348386	0.000263127	Pgr/Pdgfra/Cipc/Phlpp1/Ogt/Srebf1/Ntrk2/Stat5a/Ngfr/Ahr/Esr1/Lep/Nfil3/Adcy1/Erbb2/Npas2/Rai1/Kmt2a/Rora/Naglu/Gsk3b	21
GO:0002064	epithelial cell development	19/509	246/23174	2.41706e-06	0.000399035	0.000301381	Pgr/Atp2b2/Pax6/Dact2/Wnt5a/Cldn1/Myadm/S1pr2/Tmod1/Esr1/Cgn/Tjp1/Afdn/Ptprs/Dmd/Vim/Arid4b/Sec24b/Gpat4	19
GO:0001558	regulation of cell growth	26/509	429/23174	3.58208e-06	0.000527438	0.00039836	Socs2/Rb1/Sema4a/Sema3g/Dbn1/Ncoa3/Flt4/Rerg/Trim46/Wnt5a/Nedd4l/Mgll/Afdn/Tgfb2/Zfp639/Ptprs/Tgfbr1/P3h1/Cdhr2/Erbb2/Rgma/G6pdx/Ccn5/Dcbld2/Trip10/Gsk3b	26
GO:0060840	artery development	12/509	106/23174	3.75362e-06	0.000537906	0.000406267	Gja5/Ngfr/Stra6/Lox/Cited2/Tgfb2/Lep/Tgfbr1/Zmiz1/Robo1/Sec24b/Nf1	12
GO:0090132	epithelium migration	20/509	282/23174	4.84566e-06	0.000613934	0.000463689	Sema4a/Csnk2b/Flt4/Alox12/Loxl2/Wnt5a/Pik3c2a/Stat5a/Calr/Itgb3/Pkn3/Grn/Tgfb2/Tgfbr1/Cd63/Amot/Snai2/Jun/Robo1/Nf1	20
GO:0048144	fibroblast proliferation	12/509	109/23174	5.03611e-06	0.000623563	0.000470961	Pdgfra/Kmt2c/Wnt5a/Ngfr/Itgb3/Esr1/Gas6/Zmiz1/Jun/Nf1/Gstp1/Ptprz1	12
GO:0035265	organ growth	17/509	215/23174	5.96226e-06	0.000676717	0.000511107	Pdgfra/Erbb4/Col6a1/Col6a2/Ahr/Esr1/Cited2/Col7a1/Tgfb2/Lep/Tgfbr1/G6pdx/Trip10/Ncam1/Tcf7l2/Gsk3b/Col6a3	17
GO:0002573	myeloid leukocyte differentiation	17/509	216/23174	6.34273e-06	0.000705208	0.000532626	Lyn/Rb1/App/Pik3r1/Rbp1/Stat5a/Itgb3/Traf6/Cited2/Fbn1/Sbno2/Prxl2a/Jun/Kitl/Lrrc17/Nf1/Gsk3b	17
GO:0007548	sex differentiation	20/509	288/23174	6.63662e-06	0.000723126	0.000546158	Pgr/Pdgfra/Osr1/Dhcr24/Ncoa3/Wnt5a/Stat5a/Ahr/Esr1/Tiparp/Stra6/Cited2/Wnt9b/Tgfb2/Lep/Tgfbr1/Taf4/Arid4b/Kitl/Tcf7l2	20
GO:0060560	developmental growth involved in morphogenesis	19/509	268/23174	8.38014e-06	0.000887949	0.000670646	Sema4a/Sema3g/Dbn1/App/Trim46/Plxna1/Wnt5a/Tiam1/Ahr/Esr1/Nedd4l/Mgll/Afdn/Impact/Ptprs/Areg/Rgma/Robo1/Gsk3b	19
GO:0060562	epithelial tube morphogenesis	23/509	378/23174	1.2209e-05	0.00123175	0.000930309	Ret/Pgr/Pdgfra/Osr1/Csnk2b/Ncoa3/Alox12/Wnt5a/Traf6/Ahr/Esr1/Cited2/Wnt9b/Cecr2/Tgfb2/Pkd1/Areg/Rgma/Adamts16/Arl13b/Irx3/Robo1/Sec24b	23
GO:0048806	genitalia development	8/509	51/23174	1.42368e-05	0.00138504	0.00104608	Pdgfra/Dhcr24/Ncoa3/Wnt5a/Esr1/Stra6/Wnt9b/Tcf7l2	8
GO:0045785	positive regulation of cell adhesion	24/509	410/23174	1.50378e-05	0.00143729	0.00108555	Tgm2/Ret/Fbln2/Alox15/Dbn1/Itga6/Ephb6/Pcsk5/Wnt5a/Stat5a/Myadm/Calr/Itgb3/Traf6/Cited2/Afdn/Tgfb2/Lep/Cd63/Dmd/Erbb2/Zmiz1/Prex1/Gsk3b	24
GO:0009611	response to wounding	27/509	495/23174	1.59038e-05	0.00146854	0.00110915	Lyn/Pdgfra/F5/Alox15/Col5a1/Alox12/Erbb4/Wnt5a/Thbd/Ngfr/Itgb3/Evpl/Lox/Grn/Gas6/Tgfb2/P2rx5/Dsp/Ptprs/Snai2/Erbb2/Krt6a/Rgma/F13a1/Dcbld2/Jun/Nf1	27
GO:0042391	regulation of membrane potential	25/509	440/23174	1.65877e-05	0.00150616	0.00113756	Dbn1/App/Alox12/Cacna1g/Ntrk2/Gja5/Arl6ip5/Ngfr/Kcnn4/S1pr2/Insyn1/Gabrp/Nedd4l/Afdn/Bid/P2rx5/Dsp/Gria1/Dmd/Kcnj2/Gclc/Jun/Slmap/Gsk3b/Atp1b1	25
GO:0008361	regulation of cell size	16/509	210/23174	1.77152e-05	0.00154265	0.00116512	Ret/Sema4a/Sema3g/Dbn1/Atp2b2/Trim46/Ogt/Wnt5a/Kcnn4/Ahr/Deptor/Rb1cc1/Mgll/Ptprs/Rgma/Gsk3b	16
GO:0048588	developmental cell growth	18/509	258/23174	1.78927e-05	0.00154265	0.00116512	Sema4a/Sema3g/Dbn1/App/Trim46/Plxna1/Wnt5a/Tiam1/Nedd4l/Mgll/Afdn/Impact/Ptprs/Rgma/G6pdx/Trip10/Kmt2d/Gsk3b	18
GO:0033002	muscle cell proliferation	17/509	234/23174	1.81222e-05	0.00154265	0.00116512	Tgm2/Pdcd4/Pik3r1/Alox12/Erbb4/Itgb3/Traf6/Esr1/Cited2/Tgfb2/Tgfbr1/Dnmt1/Pik3ca/Ncam1/Jun/Tcf7l2/Gsk3b	17
GO:0050920	regulation of chemotaxis	16/509	212/23174	1.99187e-05	0.00161966	0.00122329	C5ar2/Lyn/Pdgfra/Sema4a/Cxcl14/Lpar1/Sema3g/Wnt5a/Calr/Tiam1/Camk1d/Gas6/Mtus1/Snai2/Robo1/Zswim6	16
GO:0031589	cell-substrate adhesion	21/509	337/23174	2.03989e-05	0.00163432	0.00123436	Fbln2/Sorbs3/Alox15/Dbn1/Itga6/Pik3r1/Pcsk5/Myadm/Calr/Tiam1/Itgb3/Hspg2/Itga8/Gas6/Cd63/Dmd/Lamc1/Prex1/Nf1/Gsk3b/Ptprz1	21
GO:0010632	regulation of epithelial cell migration	16/509	225/23174	4.11723e-05	0.00275394	0.00207998	Sema4a/Csnk2b/Flt4/Alox12/Wnt5a/Pik3c2a/Stat5a/Calr/Itgb3/Grn/Tgfb2/Cd63/Amot/Snai2/Jun/Nf1	16
GO:0070668	positive regulation of mast cell proliferation	3/509	4/23174	4.14506e-05	0.00275394	0.00207998	Lyn/Stat5a/Kitl	3
GO:0003254	regulation of membrane depolarization	7/509	45/23174	5.21234e-05	0.00315149	0.00238024	Alox12/Cacna1g/Gja5/Ngfr/Nedd4l/Gclc/Slmap	7
GO:0070372	regulation of ERK1 and ERK2 cascade	19/509	306/23174	5.25653e-05	0.00315149	0.00238024	C5ar2/Lyn/Pdgfra/Alox15/App/Flt4/Ackr3/Phlpp1/Erbb4/Tiam1/Itgb3/Esr1/Ptpn1/Gas6/Dmd/Erbb2/Garem1/Jun/Gstp1	19
GO:0045926	negative regulation of growth	18/509	280/23174	5.26405e-05	0.00315149	0.00238024	Socs2/Sema4a/Sema3g/Rerg/Trim46/Wnt5a/Stc2/Cited2/Tgfb2/Ptprs/P3h1/Cdhr2/Krt6a/Rgma/Rai1/G6pdx/Dcbld2/Tcf7l2	18
GO:0006605	protein targeting	17/509	256/23174	5.65608e-05	0.00324362	0.00244982	Ptpn5/Fbxo7/Ogt/Srebf1/Rab3ip/Nedd4/Stxbp4/Hspa4/Scarb2/Folr2/Bid/Erbb2/Timm13/Trak1/Ssr3/Nucb1/Gnptab	17
GO:1901216	positive regulation of neuron death	11/509	118/23174	5.94652e-05	0.00337465	0.00254879	Ptpn5/Wnt5a/Ngfr/Grn/Casp2/Tgfb2/Jun/C1qa/Nf1/Gsk3b/Ptprz1	11
GO:0032102	negative regulation of response to external stimulus	20/509	336/23174	6.0644e-05	0.00340607	0.00257252	C5ar2/Pdcd4/Pdgfra/Cd200/Rb1/Sema4a/Sema3g/Dbn1/Alox12/Wnt5a/Thbd/Grn/Lep/Htra1/Ptprs/Snai2/Rgma/Rora/Robo1/Gstp1	20
GO:0198738	cell-cell signaling by wnt	23/509	427/23174	8.09118e-05	0.00415856	0.00314086	Zfp703/Wif1/Csnk2b/Dact2/Atp6v1c2/Wnt5a/Bcl9l/Sox10/Tiam1/Fzd10/Trabd2b/Wnt9b/Tle4/Celsr2/Pkd1/Tbl1x/Snai2/Krt6a/Fbxw4/Atp6v0c/Spin1/Tcf7l2/Gsk3b	23
GO:0048545	response to steroid hormone	15/509	216/23174	9.28516e-05	0.00463432	0.00350019	Pgr/Fibin/Ncoa3/Pik3r1/Ptger2/Ntrk2/Trim68/Calr/Esr1/Lox/Tgfb2/Areg/Tbl1x/Eif4ebp1/Kmt2d	15
GO:0070997	neuron death	22/509	404/23174	9.82645e-05	0.00463432	0.00350019	Ptpn5/Cd200/Fbxo7/Rb1/App/Wnt5a/Ntrk2/Ngfr/Esr1/Grn/Casp2/Tgfb2/G6pdx/Pik3ca/Gclc/Jun/C1qa/Dio3/Nf1/Gsk3b/Ptprz1/Pigt	22
GO:0006868	glutamine transport	3/509	5/23174	0.000101931	0.00463432	0.00350019	Slc38a3/Lep/Slc38a2	3
GO:0018057	peptidyl-lysine oxidation	3/509	5/23174	0.000101931	0.00463432	0.00350019	Loxl2/Lox/Loxl1	3
GO:0070662	mast cell proliferation	3/509	5/23174	0.000101931	0.00463432	0.00350019	Lyn/Stat5a/Kitl	3
GO:0043087	regulation of GTPase activity	18/509	295/23174	0.000102553	0.00463432	0.00350019	Itga6/Plxna1/Wnt5a/Ntrk2/Dock9/Tiam1/Fzd10/Arhgef10/Vav2/Afdn/Usp6nl/Amot/Erbb2/Rgma/Prex1/Nf1/Gsk3b/Ralgapa2	18
GO:0006575	cellular modified amino acid metabolic process	13/509	172/23174	0.000115923	0.00497281	0.00375584	Gpx3/P4ha3/Plod1/Plod2/Ptges/Ero1l/Aldh9a1/Ggt5/G6pdx/Gclc/Dio3/Gstp1/Gstt3	13
GO:2000649	regulation of sodium ion transmembrane transporter activity	7/509	51/23174	0.000118713	0.00505274	0.00381621	Fxyd3/Osr1/Nedd4/Nedd4l/Dmd/Slmap/Atp1b1	7
GO:0042116	macrophage activation	9/509	89/23174	0.000148499	0.00608289	0.00459425	Cd200/App/Wnt5a/Myo18a/Grn/Sbno2/Jun/Rora/C1qa	9
GO:0033674	positive regulation of kinase activity	24/509	475/23174	0.000151594	0.0061633	0.00465499	Mmd2/Ret/Lyn/Pdgfra/Lpar1/Wnt5a/Map3k14/Map4k5/Tiam1/Fzd10/Itgb3/Traf6/Vav2/Ptpn1/Gas6/Tgfb2/Lep/Pkd1/Tgfbr1/Erbb2/Magi3/Kitl/Atg14/Robo1	24
GO:0043112	receptor metabolic process	14/509	201/23174	0.000152861	0.00616879	0.00465913	Ptpn5/Ramp1/Dnm1/Ackr3/Nedd4/Kif16b/Itgb3/Ptpn1/Gria1/Cd63/Dmd/Dnm3/Nsf/Mylip	14
GO:0032092	positive regulation of protein binding	10/509	110/23174	0.000157683	0.00631658	0.00477076	Spon1/App/Ephb6/Wnt5a/Tiam1/Hspa4/Pkd1/Aktip/Tcf7l2/Gsk3b	10
GO:0031345	negative regulation of cell projection organization	14/509	205/23174	0.000187768	0.00705489	0.00532838	Sema4a/Lpar1/Sema3g/Trim46/Rab3ip/Wnt5a/Ngfr/Ptprs/Vim/Rgma/Gsk3b/Dnm3/Ptprz1/Mylip	14
GO:0035434	copper ion transmembrane transport	3/509	6/23174	0.00020053	0.00711116	0.00537088	Slc31a1/Slc11a2/Atox1	3
GO:0060021	roof of mouth development	9/509	93/23174	0.000208005	0.00731104	0.00552185	Pdgfra/Osr1/Alx4/Wnt5a/Tiparp/Wnt9b/Tgfb2/Tgfbr1/Snai2	9
GO:0048706	embryonic skeletal system development	11/509	138/23174	0.000241534	0.00812271	0.00613488	Pdgfra/Osr1/Alx4/Pcsk5/Wnt5a/Hspg2/Wnt9b/Tgfb2/Tgfbr1/Etl4/Tbx15	11
GO:0007611	learning or memory	17/509	289/23174	0.000244334	0.00815953	0.00616269	App/Pax6/Map1a/Ntrk2/Idua/Stra6/Itga8/Adgrf1/Gria1/Adcy1/Slc11a2/Kmt2a/Man2b1/Ncam1/Jun/Nf1/Ptprz1	17
GO:0030100	regulation of endocytosis	17/509	290/23174	0.000254407	0.00825004	0.00623105	Ptpn5/Alox15/Dnm1/Wnt5a/Myo18a/Nedd4/Calr/Itgb3/Rab5c/Arhgap21/Cd14/Nedd4l/Camk1d/Ptpn1/Gas6/Cd63/Nsf	17
GO:0048660	regulation of smooth muscle cell proliferation	12/509	163/23174	0.000268347	0.00849339	0.00641485	Tgm2/Pdcd4/Pik3r1/Alox12/Itgb3/Traf6/Esr1/Dnmt1/Pik3ca/Jun/Tcf7l2/Gsk3b	12
GO:0043030	regulation of macrophage activation	7/509	58/23174	0.000270147	0.00849339	0.00641485	Cd200/App/Wnt5a/Myo18a/Grn/Rora/C1qa	7
GO:0003158	endothelium development	10/509	119/23174	0.000300273	0.00915476	0.00691436	Csnk2b/Alox12/Cldn1/Myadm/S1pr2/Tjp1/Afdn/Ptprs/Tgfbr1/Dmd	10
GO:0050890	cognition	18/509	323/23174	0.000313394	0.00938115	0.00708534	App/Pax6/Map1a/Ntrk2/Idua/Stra6/Itga8/Adgrf1/Gria1/Adcy1/Slc11a2/Kmt2a/Rp9/Man2b1/Ncam1/Jun/Nf1/Ptprz1	18
GO:0046847	filopodium assembly	7/509	60/23174	0.00033416	0.00967865	0.00731004	Dbn1/Itga6/Rab3ip/S1pr2/Palm/Tgfbr1/Dnm3	7
GO:0043547	positive regulation of GTPase activity	14/509	217/23174	0.000336693	0.00967865	0.00731004	Itga6/Wnt5a/Dock9/Tiam1/Fzd10/Arhgef10/Afdn/Usp6nl/Erbb2/Rgma/Prex1/Nf1/Gsk3b/Ralgapa2	14
GO:0007040	lysosome organization	7/509	61/23174	0.000370434	0.0101925	0.00769817	Idua/Grn/Aktip/Atp6v0c/Naglu/Zkscan3/Gnptab	7
GO:0080171	lytic vacuole organization	7/509	61/23174	0.000370434	0.0101925	0.00769817	Idua/Grn/Aktip/Atp6v0c/Naglu/Zkscan3/Gnptab	7
GO:0043254	regulation of protein complex assembly	22/509	445/23174	0.000380331	0.0103602	0.0078248	Eln/Alox15/Dbn1/Pcsk5/Numa1/Myadm/Tmod1/Ahr/Esr1/Gda/Trabd2b/Senp6/Impact/Bid/Kank4/Ncam1/Prex1/Jun/Eif4ebp1/Sec24b/Slain2/Gsk3b	22
GO:0010934	macrophage cytokine production	4/509	17/23174	0.000436058	0.0115322	0.00871001	Wnt5a/Gas6/Tgfb2/Spon2	4
GO:0031623	receptor internalization	10/509	126/23174	0.000474599	0.0120604	0.00910894	Ptpn5/Ramp1/Dnm1/Ackr3/Nedd4/Itgb3/Gria1/Cd63/Dnm3/Nsf	10
GO:2001300	lipoxin metabolic process	2/509	2/23174	0.000481502	0.0120604	0.00910894	Alox15/Alox12	2
GO:2001301	lipoxin biosynthetic process	2/509	2/23174	0.000481502	0.0120604	0.00910894	Alox15/Alox12	2
GO:2001302	lipoxin A4 metabolic process	2/509	2/23174	0.000481502	0.0120604	0.00910894	Alox15/Alox12	2
GO:2001303	lipoxin A4 biosynthetic process	2/509	2/23174	0.000481502	0.0120604	0.00910894	Alox15/Alox12	2
GO:0022407	regulation of cell-cell adhesion	20/509	394/23174	0.000496896	0.0122336	0.00923976	Zfp703/Lyn/Alox15/Itga6/Pik3r1/Ephb6/Alox12/Wnt5a/Stat5a/Myadm/Traf6/Cited2/Afdn/Celsr2/Lep/Rc3h1/Snai2/Erbb2/Zmiz1/Gstp1	20
GO:0045927	positive regulation of growth	17/509	308/23174	0.00050835	0.0124192	0.00937993	Dbn1/Ncoa3/Flt4/Erbb4/Stat5a/Ahr/Nedd4l/Afdn/Tgfb2/Lep/Zfp639/Tgfbr1/Erbb2/Trip10/Ncam1/Dio3/Gsk3b	17
GO:1905314	semi-lunar valve development	5/509	31/23174	0.000531114	0.0127467	0.00962728	Rb1/Gja5/Stra6/Tgfb2/Robo1	5
GO:0033627	cell adhesion mediated by integrin	7/509	65/23174	0.000548261	0.0128275	0.0096883	Ret/Lyn/Itga6/Fyb2/Itgb3/Tgfb2/Fbn1	7
GO:0032793	positive regulation of CREB transcription factor activity	4/509	18/23174	0.000550962	0.0128275	0.0096883	Cd200/Camk1d/Adgrf1/Adcy1	4
GO:0071695	anatomical structure maturation	12/509	177/23174	0.000566487	0.0131329	0.00991892	Ret/Pgr/Rb1/App/Wnt5a/Tgfb2/Lep/G6pdx/Gpat4/C1qa/Nf1/Gsk3b	12
GO:0055074	calcium ion homeostasis	23/509	490/23174	0.000580845	0.0134087	0.0101272	Tgm2/C5ar2/Lyn/Pdgfra/Ero1l/Lpar1/App/Atp2b2/Ackr3/Ptger2/Cacna1g/Wnt5a/Atp13a5/Itgb3/Esr1/Stc2/Atp13a4/Tgfb2/Pkd1/Dmd/Letm1/Fam20a/Atp1b1	23
GO:0032922	circadian regulation of gene expression	7/509	66/23174	0.000601884	0.0136628	0.0103191	Ogt/Ngfr/Ahr/Npas2/Rai1/Kmt2a/Rora	7
GO:0043550	regulation of lipid kinase activity	6/509	48/23174	0.000611887	0.013775	0.0104039	Lyn/Pdgfra/Rb1/Pik3r1/Vav2/Atg14	6
GO:0120193	tight junction organization	6/509	48/23174	0.000611887	0.013775	0.0104039	Cldn1/Nedd4l/Cgn/Afdn/Tgfbr1/Snai2	6
GO:0050878	regulation of body fluid levels	18/509	342/23174	0.000615835	0.0138069	0.010428	Socs2/Lyn/Pdgfra/F5/Tmprss13/Atp2b2/Alox12/Erbb4/Stat5a/Thbd/Cldn1/Gja5/Itgb3/Kcnn4/Celsr2/Gas6/F13a1/Gpat4	18
GO:0032963	collagen metabolic process	9/509	109/23174	0.000677398	0.0149412	0.0112847	Ctsb/Plod1/Plod2/Adamts2/Col5a1/Idua/P3h1/Vim/P3h3	9
GO:1902903	regulation of supramolecular fiber organization	18/509	345/23174	0.000681412	0.0149458	0.0112882	Rb1/Sorbs3/Lpar1/Eln/Alox15/Dbn1/App/Pik3r1/Map1a/Numa1/Myadm/Arhgef10/Tmod1/Gda/Tgfbr1/Kank4/Prex1/Slain2	18
GO:0034109	homotypic cell-cell adhesion	7/509	68/23174	0.00072159	0.0156001	0.0117823	Zfp703/Lyn/Pdgfra/Alox12/Itgb3/Dsp/Ncam1	7
GO:0061351	neural precursor cell proliferation	12/509	183/23174	0.000760909	0.0162442	0.0122689	Lyn/Dbn1/Pax6/Wnt5a/Sox10/Ngfr/Afdn/Grn/Rora/Nf1/Shcbp1/Ptprz1	12
GO:0044843	cell cycle G1/S phase transition	12/509	185/23174	0.000836974	0.0175993	0.0132923	Fbxo7/Rb1/Susd2/Tjp3/Stxbp4/Rpl17/Casp2/Bid/Rhou/Pkd1/Eif4ebp1/Bach1	12
GO:0070838	divalent metal ion transport	22/509	473/23174	0.000854852	0.017641	0.0133238	Lyn/Ramp1/Ero1l/Atp2b2/Cacna1g/Pik3c2a/Slc41a2/Itgb3/Homer2/Kcnn4/Ahr/Stc2/Slc39a11/Gas6/Tgfb2/Pkd1/Dmd/Slc11a2/Kcnj2/Letm1/G6pdx/Atp1b1	22
GO:0006874	cellular calcium ion homeostasis	22/509	474/23174	0.000878587	0.0178602	0.0134894	Tgm2/C5ar2/Lyn/Pdgfra/Ero1l/Lpar1/App/Atp2b2/Ackr3/Ptger2/Cacna1g/Wnt5a/Atp13a5/Itgb3/Esr1/Stc2/Atp13a4/Tgfb2/Pkd1/Dmd/Letm1/Atp1b1	22
GO:0050727	regulation of inflammatory response	18/509	356/23174	0.000975793	0.0192613	0.0145476	Tgm2/Lyn/Pdcd4/Cd200/Rb1/App/Wnt5a/Stat5a/Esr1/Mgll/Grn/Lep/Pik3ap1/Sbno2/Cd5l/Rora/C1qa/Gstp1	18
GO:0008015	blood circulation	22/509	479/23174	0.001006	0.0196275	0.0148242	F5/Pik3r1/Ptger2/Alox12/Srebf1/Nav2/Cacna1g/Gja5/Ahr/Nedd4l/Mgll/Gas6/Tgfb2/Lep/Dsp/Amot/Dmd/Kcnj2/G6pdx/Adamts16/Gclc/Atp1b1	22
GO:0060326	cell chemotaxis	16/509	299/23174	0.00101999	0.0196901	0.0148714	C5ar2/Lyn/Pdgfra/Cxcl15/Cxcl14/Lpar1/Ackr3/Wnt5a/Calr/Tiam1/Lox/Camk1d/Gas6/Mtus1/Snai2/Prex1	16
GO:0098815	modulation of excitatory postsynaptic potential	6/509	53/23174	0.00104379	0.0200232	0.015123	Dbn1/App/Ngfr/S1pr2/Afdn/Gsk3b	6
GO:0032970	regulation of actin filament-based process	19/509	390/23174	0.00110577	0.0209175	0.0157984	Sorbs3/Lpar1/Eln/Alox15/Dbn1/Pik3r1/Gja5/Myadm/Fzd10/Itgb3/Arhgef10/Tmod1/Tgfb2/Dsp/Rhou/Tgfbr1/Kank4/Kcnj2/Prex1	19
GO:0040013	negative regulation of locomotion	17/509	331/23174	0.00112793	0.0212629	0.0160593	C5ar2/Cd200/Sema4a/Sema3g/Dbn1/Csnk2b/Erbb4/Srgap3/Wnt5a/Calr/Cited2/Afdn/Trim11/Cd63/Robo1/Nf1/Gsk3b	17
GO:0042594	response to starvation	11/509	166/23174	0.0011446	0.0215027	0.0162404	Slc38a3/Srebf1/Pik3c2a/Lrp11/Wnt9b/Impact/Gas6/Jun/Eif4ebp1/Atg14/Tcf7l2	11
GO:0031647	regulation of protein stability	15/509	275/23174	0.00119829	0.0222051	0.016771	Fbxo7/Pik3r1/Srebf1/Calr/Ddi2/Stxbp4/Nedd4l/Cct2/Grn/Rnf128/P3h1/Tbl1x/Lamp1/Atp1b1/Mylip	15
GO:0050803	regulation of synapse structure or activity	15/509	275/23174	0.00119829	0.0222051	0.016771	Adgre5/Thbs2/Sema4a/Dbn1/App/Dnm1/Wnt5a/Ntrk2/Nedd4/Tiam1/Afdn/Ptprs/Flrt2/Gsk3b/Dnm3	15
GO:0009067	aspartate family amino acid biosynthetic process	4/509	22/23174	0.00122858	0.0222369	0.016795	Plod1/Plod2/Adi1/Mtap	4
GO:0007041	lysosomal transport	8/509	97/23174	0.00134163	0.023791	0.0179688	Nedd4/Scarb2/Grn/Aktip/Lamp1/Trak1/Atg14/Gnptab	8
GO:0008286	insulin receptor signaling pathway	9/509	120/23174	0.00134501	0.023791	0.0179688	Socs2/Pik3r1/Ogt/Srebf1/Stxbp4/Ptpn1/Lep/Eif4ebp1/Gsk3b	9
GO:0006898	receptor-mediated endocytosis	13/509	223/23174	0.00138099	0.0242286	0.0182992	Ptpn5/Ramp1/Dnm1/Ackr3/Nedd4/Itgb3/Cd14/Scarb2/Hspg2/Gria1/Cd63/Dnm3/Nsf	13
GO:0046854	phosphatidylinositol phosphorylation	5/509	38/23174	0.00138309	0.0242286	0.0182992	Socs2/Pik3r1/Pik3c2a/Pik3ca/Efr3b	5
GO:0010643	cell communication by chemical coupling	2/509	3/23174	0.00142344	0.0242691	0.0183298	Dbn1/Gja5	2
GO:1902685	positive regulation of receptor localization to synapse	2/509	3/23174	0.00142344	0.0242691	0.0183298	Dbn1/Stx7	2
GO:0150063	visual system development	19/509	400/23174	0.00148093	0.0251344	0.0189834	Pdgfra/Pax6/Kmt2c/Col5a1/Ntrk2/Tmod1/Ahr/Stra6/Cited2/Col8a2/Tgfb2/Tgfbr1/Vim/Crybg3/Jun/Naglu/C1qa/Dio3/Nf1	19
GO:0035733	hepatic stellate cell activation	3/509	11/23174	0.00152395	0.0255708	0.019313	Lep/Gclc/Gsk3b	3
GO:0034446	substrate adhesion-dependent cell spreading	8/509	100/23174	0.00163192	0.0270074	0.020398	Dbn1/Myadm/Calr/Itgb3/Hspg2/Itga8/Lamc1/Prex1	8
GO:0032103	positive regulation of response to external stimulus	16/509	313/23174	0.00163591	0.0270074	0.020398	Tgm2/Pdcd4/Cxcl14/Lpar1/App/Wnt5a/Stat5a/Calr/Tiam1/Traf6/Camk1d/Grn/Gas6/Snai2/Pum2/C1qa	16
GO:0010656	negative regulation of muscle cell apoptotic process	6/509	58/23174	0.00167836	0.0275413	0.0208012	Pik3r1/Alox12/Erbb4/Dnmt1/Trip10/Gsk3b	6
GO:0002685	regulation of leukocyte migration	12/509	201/23174	0.00170516	0.0278831	0.0210594	C5ar2/Lyn/Cd200/Cxcl14/App/Wnt5a/Calr/Itgb3/Camk1d/Gas6/Mtus1/Kitl	12
GO:0051271	negative regulation of cellular component movement	16/509	315/23174	0.00174525	0.0278831	0.0210594	C5ar2/Cd200/Sema4a/Sema3g/Dbn1/Csnk2b/Erbb4/Srgap3/Wnt5a/Calr/Cited2/Afdn/Cd63/Robo1/Nf1/Gsk3b	16
GO:0032386	regulation of intracellular transport	20/509	437/23174	0.00174742	0.0278831	0.0210594	Ptpn5/Lyn/Dbn1/Pik3r1/Trim46/Ogt/Srebf1/Numa1/Ptpn1/Khdrbs1/Gas6/Lep/Adcy1/Erbb2/Lamp1/Nucb1/Sec24b/Tcf7l2/Nf1/Gsk3b	20
GO:0060325	face morphogenesis	5/509	40/23174	0.00174912	0.0278831	0.0210594	Pdgfra/Tiparp/Stra6/Tgfb2/Tcf7l2	5
GO:0097201	negative regulation of transcription from RNA polymerase II promoter in response to stress	3/509	12/23174	0.00199895	0.0301144	0.0227447	Cited2/Impact/Jun	3
GO:1900165	negative regulation of interleukin-6 secretion	3/509	12/23174	0.00199895	0.0301144	0.0227447	C5ar2/Cd200/Gas6	3
GO:0046850	regulation of bone remodeling	6/509	60/23174	0.002001	0.0301144	0.0227447	Tmem119/Itgb3/Idua/Lep/Ltbp3/Nf1	6
GO:0072606	interleukin-8 secretion	4/509	25/23174	0.00201689	0.0301869	0.0227994	C5ar2/Wnt5a/Cd14/Lep	4
GO:0034763	negative regulation of transmembrane transport	9/509	128/23174	0.00210356	0.0313119	0.0236491	Osr1/Pik3c2a/Nedd4/Arl6ip5/Ahr/Esr1/Nedd4l/Tgfb2/Lep	9
GO:1902806	regulation of cell cycle G1/S phase transition	9/509	128/23174	0.00210356	0.0313119	0.0236491	Fbxo7/Rb1/Susd2/Tjp3/Stxbp4/Rpl17/Casp2/Bid/Pkd1	9
GO:0042698	ovulation cycle	6/509	61/23174	0.00217888	0.0320414	0.0242001	Pgr/Pdgfra/Stat5a/Esr1/Lep/Erbb2	6
GO:0150076	neuroinflammatory response	6/509	61/23174	0.00217888	0.0320414	0.0242001	Cd200/App/Grn/Adcy1/Jun/C1qa	6
GO:0007416	synapse assembly	11/509	180/23174	0.00218197	0.0320414	0.0242001	Adgre5/Thbs2/Sema4a/App/Erbb4/Wnt5a/Ntrk2/Adgrf1/Ptprs/Flrt2/Dnm3	11
GO:0050807	regulation of synapse organization	14/509	265/23174	0.0023141	0.0334409	0.0252571	Adgre5/Thbs2/Sema4a/Dbn1/App/Wnt5a/Ntrk2/Nedd4/Tiam1/Afdn/Ptprs/Flrt2/Gsk3b/Dnm3	14
GO:0045109	intermediate filament organization	4/509	26/23174	0.00234268	0.033577	0.0253598	Dsp/Krt6a/Vim/Pkp1	4
GO:0033157	regulation of intracellular protein transport	12/509	209/23174	0.00236012	0.033577	0.0253598	Ptpn5/Pik3r1/Ogt/Srebf1/Ptpn1/Gas6/Lep/Erbb2/Nucb1/Tcf7l2/Nf1/Gsk3b	12
GO:0086002	cardiac muscle cell action potential involved in contraction	5/509	43/23174	0.00242469	0.0342221	0.0258471	Cacna1g/Gja5/Nedd4l/Dsp/Kcnj2	5
GO:0120192	tight junction assembly	5/509	43/23174	0.00242469	0.0342221	0.0258471	Cldn1/Nedd4l/Cgn/Afdn/Snai2	5
GO:1901568	fatty acid derivative metabolic process	9/509	131/23174	0.00246323	0.0346762	0.02619	Akr1c14/Ptges/Alox15/Alox12/Acox1/Mgll/Ggt5/Pla2g4f/Mgst3	9
GO:0010959	regulation of metal ion transport	19/509	419/23174	0.00249528	0.0348977	0.0263573	Lyn/Fxyd3/Osr1/Atp2b2/Cacna1g/Pik3c2a/Nedd4/Itgb3/Homer2/Ahr/Nedd4l/Stc2/Tgfb2/Cd63/Dmd/Kcnj2/G6pdx/Slmap/Atp1b1	19
GO:0042635	positive regulation of hair cycle	3/509	13/23174	0.00255649	0.0353584	0.0267053	Wnt5a/Numa1/Tgfb2	3
GO:0002697	regulation of immune effector process	19/509	420/23174	0.0025618	0.0353584	0.0267053	Lyn/Tap2/H2-Q4/Wnt5a/Myo18a/Stat5a/Il18r1/Traf6/Grn/Tgfb2/Lep/Htra1/Rc3h1/H2-T24/Lamp1/Spon2/Pum2/Cd5l/Stx7	19
GO:0048871	multicellular organismal homeostasis	21/509	485/23174	0.00263559	0.0361376	0.0272938	Rb1/Tmprss13/Tmem119/Muc13/Ogt/Alox12/Map1a/Erbb4/Il18r1/Cldn1/Itgb3/Homer2/Traf6/Idua/Lep/Slc11a2/Kmt2a/Pik3ca/Irx3/Ltbp3/Nf1	21
GO:0050919	negative chemotaxis	5/509	44/23174	0.00268696	0.0365051	0.0275714	Sema4a/Sema3g/Wnt5a/Itgb3/Robo1	5
GO:0006790	sulfur compound metabolic process	14/509	270/23174	0.00274225	0.0370071	0.0279505	Gpx3/Chst8/Ptges/Stat5a/Adi1/Idua/Ggt5/Dnmt1/Mtap/G6pdx/Gclc/Gpat4/Gstp1/Gstt3	14
GO:0046824	positive regulation of nucleocytoplasmic transport	6/509	64/23174	0.00278441	0.0370071	0.0279505	Pik3r1/Khdrbs1/Gas6/Lep/Tcf7l2/Gsk3b	6
GO:0033026	negative regulation of mast cell apoptotic process	2/509	4/23174	0.00280542	0.0370071	0.0279505	Stat5a/Kitl	2
GO:0033540	fatty acid beta-oxidation using acyl-CoA oxidase	2/509	4/23174	0.00280542	0.0370071	0.0279505	Acox2/Acox1	2
GO:0051365	cellular response to potassium ion starvation	2/509	4/23174	0.00280542	0.0370071	0.0279505	Slc38a3/Jun	2
GO:0072180	mesonephric duct morphogenesis	2/509	4/23174	0.00280542	0.0370071	0.0279505	Osr1/Wnt9b	2
GO:0050708	regulation of protein secretion	21/509	489/23174	0.00290093	0.0378999	0.0286249	C5ar2/Lyn/Cd200/Rab11fip1/Srebf1/Wnt5a/Myo18a/Gja5/Tiam1/Traf6/Kcnn4/Stxbp4/Idua/Cd14/Gas6/Tgfb2/Lep/P3h1/Klf7/Tcf7l2/Nnat	21
GO:0043029	T cell homeostasis	5/509	46/23174	0.00327216	0.0407003	0.0307399	Spns2/Stat5a/Ahr/Tgfb2/Rc3h1	5
GO:0021915	neural tube development	11/509	190/23174	0.00331217	0.0411041	0.0310449	Pax6/Wnt5a/Traf6/Cited2/Cecr2/Tgfb2/Rgma/Arl13b/Sec24b/Tcf7l2/Nf1	11
GO:0033273	response to vitamin	4/509	29/23174	0.00353368	0.0427811	0.0323115	Rbp1/Gas6/Snai2/Cyp24a1	4
GO:0033687	osteoblast proliferation	4/509	29/23174	0.00353368	0.0427811	0.0323115	Tmem119/Itgb3/Ahr/Gsk3b	4
GO:0150077	regulation of neuroinflammatory response	4/509	29/23174	0.00353368	0.0427811	0.0323115	Cd200/App/Grn/C1qa	4
GO:0051489	regulation of filopodium assembly	5/509	47/23174	0.00359677	0.0432565	0.0326706	Dbn1/Rab3ip/Palm/Tgfbr1/Dnm3	5
GO:0032956	regulation of actin cytoskeleton organization	16/509	342/23174	0.00392869	0.0457151	0.0345275	Sorbs3/Lpar1/Eln/Alox15/Dbn1/Pik3r1/Myadm/Fzd10/Itgb3/Arhgef10/Tmod1/Tgfb2/Rhou/Tgfbr1/Kank4/Prex1	16
GO:1990778	protein localization to cell periphery	16/509	342/23174	0.00392869	0.0457151	0.0345275	Ramp1/Rabep1/Pik3r1/Numa1/Myadm/Fyb2/Afdn/Gas6/Palm/Arl13b/Slmap/Efr3b/Stx7/Gsk3b/Nsf/Atp1b1	16
GO:0006878	cellular copper ion homeostasis	3/509	15/23174	0.00393651	0.0457151	0.0345275	App/Slc31a1/Atox1	3
GO:0010935	regulation of macrophage cytokine production	3/509	15/23174	0.00393651	0.0457151	0.0345275	Wnt5a/Tgfb2/Spon2	3
GO:0070234	positive regulation of T cell apoptotic process	3/509	15/23174	0.00393651	0.0457151	0.0345275	Wnt5a/Siglec1/Tgfb2	3
GO:0002027	regulation of heart rate	7/509	92/23174	0.00416214	0.0471421	0.0356052	Pik3r1/Srebf1/Cacna1g/Gja5/Dsp/Dmd/Kcnj2	7
GO:0045103	intermediate filament-based process	5/509	49/23174	0.00431423	0.0485619	0.0366775	Evpl/Dsp/Krt6a/Vim/Pkp1	5
GO:0030510	regulation of BMP signaling pathway	7/509	93/23174	0.00441789	0.0489337	0.0369584	Wnt5a/Numa1/Htra1/Fbn1/Rgma/Trim33/Tcf7l2	7
GO:0044030	regulation of DNA methylation	4/509	31/23174	0.00452257	0.0489337	0.0369584	Dnmt1/Kmt2a/Pik3ca/Gsk3b	4
GO:0098884	postsynaptic neurotransmitter receptor internalization	4/509	31/23174	0.00452257	0.0489337	0.0369584	Dnm1/Nedd4/Itgb3/Dnm3	4
GO:0140239	postsynaptic endocytosis	4/509	31/23174	0.00452257	0.0489337	0.0369584	Dnm1/Nedd4/Itgb3/Dnm3	4
GO:0009786	regulation of asymmetric cell division	2/509	5/23174	0.00460775	0.0489337	0.0369584	Pax6/Wnt9b	2
GO:0010693	negative regulation of alkaline phosphatase activity	2/509	5/23174	0.00460775	0.0489337	0.0369584	Ahr/Tgfb2	2
GO:0033023	mast cell homeostasis	2/509	5/23174	0.00460775	0.0489337	0.0369584	Stat5a/Kitl	2
GO:0061890	positive regulation of astrocyte activation	2/509	5/23174	0.00460775	0.0489337	0.0369584	App/C1qa	2
GO:0072081	specification of nephron tubule identity	2/509	5/23174	0.00460775	0.0489337	0.0369584	Osr1/Irx3	2
GO:0002711	positive regulation of T cell mediated immunity	6/509	71/23174	0.00467881	0.0493995	0.0373102	Tap2/H2-Q4/Il18r1/Traf6/H2-T24/Stx7	6
GO:0045124	regulation of bone resorption	5/509	50/23174	0.00470875	0.0494282	0.0373319	Tmem119/Itgb3/Idua/Ltbp3/Nf1	5
GO:0006825	copper ion transport	3/509	16/23174	0.00476664	0.0495585	0.0374302	Slc31a1/Slc11a2/Atox1	3
GO:0048820	hair follicle maturation	3/509	16/23174	0.00476664	0.0495585	0.0374302	Wnt5a/Tgfb2/Nf1	3
GO:0055070	copper ion homeostasis	3/509	16/23174	0.00476664	0.0495585	0.0374302	App/Slc31a1/Atox1	3
GO:0097284	hepatocyte apoptotic process	3/509	16/23174	0.00476664	0.0495585	0.0374302	Rb1/Bid/Gsk3b	3
GO:1902993	positive regulation of amyloid precursor protein catabolic process	3/509	16/23174	0.00476664	0.0495585	0.0374302	Spon1/Lyn/App	3
GO:0051963	regulation of synapse assembly	8/509	119/23174	0.00480155	0.0498263	0.0376326	Adgre5/Thbs2/Sema4a/App/Wnt5a/Ntrk2/Ptprs/Flrt2	8
