# Supplementary material for: Estrogen exacerbates mammary involution through neutrophil-dependent and -independent mechanism
Source: eLife journal article supplement (doi:10.7554/elife.57274), 2020-07-24
Supplement: supp [file elife-57274-supp-v1.zip › elife_poa_e57274_Figure_2_source_data_7.xlsx]

## Sheet: ego2_IGG_ONLY_SIMPLIFY
ID	Description	GeneRatio	BgRatio	pvalue	p.adjust	qvalue	geneID	Count
GO:0050900	leukocyte migration	93/1595	340/23174	9.06919e-32	7.72242e-28	5.47016e-28	Smpd3/Ccr6/Kit/Edn1/Dapk2/Dock8/Slc12a2/Mif/Rac1/Trp53/Adam17/Dysf/Myd88/Flt1/Nod2/Trpv4/Hsd3b7/Tgfb1/Ptafr/Eps8/Il17ra/Ecm1/Plvap/Anxa1/Pdgfb/Tnfrsf18/Fcgr3/Cmklr1/Ripk3/Ada/Pde4b/Lgmn/Pla2g7/Msn/Vav1/Padi2/Icam1/Slit2/Gcnt1/Ccl11/Pf4/Ccl9/Trpm2/Ccl6/Il1r1/Emilin1/Fcer1g/Cd200r1/Itgb2/Foxj1/Thbs1/Artn/Cd177/Mcoln2/Itga2/Lgals3/Bst1/Csf1/Mmp9/Selp/Gpr35/Tnf/Madcam1/C5ar1/Cyp7b1/Itgam/Dusp1/Serpin…	93
GO:0019221	cytokine-mediated signaling pathway	71/1595	338/23174	1.56628e-17	1.48188e-14	1.04968e-14	Kit/Acsl1/Il6ra/Adipoq/Pparg/Angpt1/Tnfrsf11a/Slc27a1/Trim6/Crebrf/Gab1/Appl2/Ptprf/Samhd1/Ilk/Cactin/Crlf2/Trp53/Adam17/Myd88/Oas2/Krt8/Foxc1/Ecm1/Plvap/Pdgfb/Ifitm3/Casp4/Nfkbia/Ifitm2/Sh2b2/Ikbke/Padi2/Slit2/Ccl11/Pf4/Ackr1/Ccl9/Cntfr/Spi1/Ccl6/Il1r1/Fcer1g/Sphk1/Hpx/Csf1/Gpr35/Grem2/Tnf/Ifitm1/Ifitm6/Cxcr4/Cxcl1/Ccr1/Ccl12/Il18rap/Ppbp/Ccl2/Ccl3/Il6/Ccl4/Ereg/Il1b/Cxcr2/Il1r2/Il1rn/Cd300lf/Os…	71
GO:0050727	regulation of inflammatory response	73/1595	356/23174	2.20455e-17	1.87717e-14	1.32969e-14	Duoxa1/Adipoq/Nr1d2/Lpl/Pparg/Cd55/Tnfrsf11a/Gprc5b/Pde2a/Appl2/Tlr3/Mif/Selenos/Tmem173/Myd88/Nod2/Trpv4/Tnip1/Cebpb/Il17ra/Anxa1/Fcgr3/Fcgr2b/Metrnl/Ier3/Nfkbia/Ada/Ldlr/Siglece/Zc3h12a/Slit2/Ccn4/Dusp10/Sema7a/Fndc4/Zfp36/Il1r1/Ccr5/Fcgr1/Fcer1g/Cd200r1/Nt5e/Alox5ap/Tnfrsf1b/Tnfaip3/Socs3/C2cd4b/Itga2/Sphk1/Bst1/Tnf/Adora2b/C5ar1/Serpine1/Tnfaip6/Cd200r4/Cd44/Adam8/Nlrp3/Ccl3/Il6/Fpr2/Mmp8/Ptg…	73
GO:0002685	regulation of leukocyte migration	52/1595	201/23174	3.54431e-17	2.74362e-14	1.94343e-14	Smpd3/Ccr6/Edn1/Dapk2/Dock8/Mif/Rac1/Trp53/Adam17/Dysf/Myd88/Nod2/Trpv4/Tgfb1/Ptafr/Ecm1/Plvap/Anxa1/Tnfrsf18/Cmklr1/Ripk3/Ada/Lgmn/Pla2g7/Msn/Padi2/Icam1/Slit2/Il1r1/Emilin1/Cd200r1/Thbs1/Itga2/Lgals3/Bst1/Csf1/Mmp9/Selp/Madcam1/C5ar1/Dusp1/Serpine1/Sele/Ccr1/Il23a/Ccl12/Adam8/Ccl2/Fpr2/Ccl4/Il1b/Cxcr2	52
GO:0070371	ERK1 and ERK2 cascade	66/1595	323/23174	9.19527e-16	6.52481e-13	4.62183e-13	Kit/Adipoq/Fgfr2/Prxl2c/St5/Angpt1/Cd36/Tnfrsf11a/Sirt3/Dstyk/Pten/Phb2/Rap1b/Mif/Map2k1/Gnai2/Prmt5/Sox9/Hmgcr/Adam17/Zfp36l1/Arrb2/Ece1/Flt1/Spry2/Nod2/Trpv4/Tnip1/Tgfb1/Lrp1/Cavin3/Pdgfb/Spred1/Ccn2/Glipr2/Pdgfa/Akap12/Dusp4/Icam1/Spry4/Ccl11/Dusp10/Sema7a/Myc/Ccl9/Dusp6/Ccl6/Errfi1/Emilin1/Epha2/Lif/Gcnt2/Ccn1/C5ar1/Dusp1/Cd44/Ccr1/Ccl12/Ngf/Ccl2/Ccl3/Il6/Fpr2/Ccl4/Il1b/Nlrp12	66
GO:0032103	positive regulation of response to external stimulus	64/1595	313/23174	2.43088e-15	1.49028e-12	1.05563e-12	Ccr6/Lpl/Edn1/Dapk2/Tnfrsf11a/Gprc5b/Pde2a/Tlr3/Mif/Rac1/Dhx58/Adam17/Dysf/Myd88/Nod2/Trpv4/Tnip1/Cebpb/Tgfb1/Igf1r/Lrp1/Il17ra/Pdgfb/Fcgr3/Cmklr1/Nfkbia/Ldlr/Lgmn/Pla2g7/Slit2/Ccn4/Ccr5/Fcgr1/Fcer1g/Alox5ap/Thbs1/Artn/C2cd4b/Trim15/Itga2/Csf1/Tnf/Adora2b/C5ar1/Serpine1/Cxcr4/Cxcl1/Ccr1/Il23a/Adam8/Ccl2/Ccl3/Il6/Fpr2/Mmp8/Ccl4/Ptgs2/Il1b/Cxcr2/Osm/Tarm1/S100a8/S100a9/Acod1	64
GO:0050663	cytokine secretion	55/1595	243/23174	2.45025e-15	1.49028e-12	1.05563e-12	Lgr4/Lpl/Cidea/Rorc/Angpt1/Cd36/Trim6/Mbp/Vtcn1/P2rx7/Gpam/Sptbn1/Mif/Crlf2/Dysf/Nod2/Trpv4/Lrp1/Il17ra/Tmem106a/Anxa1/Casp4/Rnf19b/Cd209d/Isg15/Zc3h12a/Lcp2/Akap12/Ccn4/Fermt1/Ccr5/Arg2/Cd200r1/Cd84/Cd244a/Tnfrsf1b/Tnfaip3/Clec5a/Mcoln2/Il4ra/Tnf/Srgn/Fgr/Clec4n/Nlrp3/Ccl3/Il6/Mmp8/Il1b/Il1r2/Osm/Nlrp12/Clec4e/Trem1/Trem3	55
GO:0032102	negative regulation of response to external stimulus	66/1595	336/23174	6.93192e-15	3.68908e-12	2.61315e-12	Tnr/Robo2/Mill2/Adipoq/Nr1d2/Nucb2/Sema6c/Tspan8/Pparg/Cacnb3/Cdkn1b/Appl2/Neo1/Pten/Mif/Sema4d/Cactin/Dhx58/Selenos/Sema4c/Hmgcr/Sema3f/Nod2/C1qtnf1/Pdgfb/Trib1/Serpine2/Fcgr2b/Sema6b/Metrnl/Ier3/Ubash3b/Ada/Ldlr/Siglece/Pdgfa/Gja1/Tpsab1/Padi2/Zc3h12a/Slit2/Dusp10/Sema7a/Fndc4/Zfp36/Arg2/Cd200r1/Nt5e/Xylt1/Fgl2/Anxa2/Thbs1/Tnfrsf1b/Tnfaip3/Socs3/Dusp1/Serpine1/Tnfaip6/Cd44/Ccl12/Nlrp3/Fpr2/Mefv…	66
GO:0045444	fat cell differentiation	53/1595	238/23174	1.60712e-14	8.04979e-12	5.70205e-12	Mmp11/Adipoq/Lpl/Lgals12/Nucb2/Per2/Rorc/Wnt5b/Pparg/Bbs9/Arl4a/Rnasel/Nudt7/Crebl2/Sfrp1/Pex11a/Adgrf5/Aldh6a1/Taf8/Nipbl/Wwtr1/Lrp6/Atf5/Zfp36l1/Dysf/Trpv4/Cebpd/Adig/Sh3pxd2b/Cebpb/Tgfb1/Trib3/Jdp2/Hes1/Cmklr1/Sod2/Metrnl/Sh2b2/Steap4/Mrap/Zc3h12a/Nr4a2/Ccn4/Dusp10/Zfp36/Plac8/Egr2/Noct/Nr4a1/Tnf/Gdf6/Nr4a3/Ptgs2	53
GO:0031349	positive regulation of defense response	69/1595	371/23174	2.87415e-14	1.35963e-11	9.63092e-12	Tlr11/Mill2/Lgr4/Lpl/Tril/Cd36/Tnfrsf11a/Gprc5b/Pde2a/Trim6/Appl2/Tlr3/Pja2/Mif/Cactin/Rps6ka3/Dhx58/Tmem173/Arrb2/Myd88/Nod2/Trpv4/Tnip1/Trim30a/Cebpb/Pvr/Il17ra/Fcgr3/Nfkbia/Ldlr/Ikbke/Mndal/Gja1/Vav1/Ccn4/Ccr5/Fcgr1/Fcer1g/Alox5ap/Tnfaip3/C2cd4b/Trim15/Itga2/Hpx/Tlr13/Tnf/Adora2b/Tnip3/Serpine1/Cxcl1/Reg3g/Treml4/Il18rap/Adam8/Ccl3/Il6/Fpr2/Mmp8/Ereg/Ptgs2/Il1b/Cd300lf/Osm/Tarm1/S100a8/S100a9/…	69
GO:0001819	positive regulation of cytokine production	77/1595	445/23174	5.02812e-14	2.25339e-11	1.59618e-11	Prkcq/Adra2a/Il6ra/Adipoq/Zbtb20/Lpl/Cd36/Gprc5b/Trim6/Mbp/Vtcn1/P2rx7/Tlr3/Sptbn1/Mif/Crlf2/Dhx58/Atf4/Ddx21/Adam17/Tmem173/Myd88/Nod2/Trpv4/Cebpb/Tgfb1/Ptafr/Lrp1/Il17ra/Anxa1/Fcgr3/Casp4/Bcl3/Nfam1/Cd209d/Hif1a/Pde4b/Mndal/Akap12/Hilpda/Pf4/Sema7a/Fermt1/Il1r1/Ccr5/Fcer1g/Cd84/Thbs1/Cd244a/Cyp1b1/Clec5a/Mcoln2/Trim15/Il4ra/Tnf/Adora2b/Slc11a1/C5ar1/Serpine1/Fgr/Clec4n/Il23a/Adam8/Nlrp3/Ccl2/Cc…	77
GO:0007159	leukocyte cell-cell adhesion	61/1595	319/23174	2.54907e-13	1.05581e-10	7.47882e-11	Pla2g2d/Prkcq/Skint2/Sftpd/Il6ra/Dock8/Vtcn1/Gpam/Ephb4/Cbfb/Sema4d/Shb/Cblb/Sdc4/Tnip1/Cebpb/Tgfb1/Ptafr/Nrarp/Anxa1/Hes1/Ada/Lgals1/Myb/Msn/Zc3h12a/Icam1/Gcnt1/Dusp10/Arg2/Itga5/Nt5e/Itgb2/Nfkbid/Fgl2/Foxj1/Cd244a/Cd177/Lgals3/Il4ra/Selp/Tnf/Madcam1/Cd209e/Slfn1/Itgam/Sele/Has2/Cd44/Il23a/Cd80/Adam8/Nlrp3/Ccl2/Il6/Nr4a3/Olr1/Il1b/Tarm1/S100a8/S100a9	61
GO:0062012	regulation of small molecule metabolic process	65/1595	353/23174	2.60388e-13	1.05581e-10	7.47882e-11	Smpd3/Kit/Ephx2/Prox1/Adipoq/Zbtb20/Igfbp5/Nucb2/Prkaa2/Rorc/Prxl2c/Dbi/Pparg/Thrb/Pde2a/Vdr/Appl2/Nr3c1/Dyrk2/Sec14l2/Pfkfb2/Ncor1/Epm2aip1/P2rx7/Foxk1/Mif/Map2k1/Pde12/Acsl5/Pgam1/Midn/Trp53/Slc7a7/Kat2a/Eif6/Nos3/Ppif/Rdh10/C1qtnf1/Ddit4/Tgfb1/Ptafr/Trib3/Entpd1/Anxa1/Pdgfb/Adcyap1r1/Ttc39b/Ier3/Hif1a/Ldlr/Myc/Fabp5/Pid1/Cd244a/Tnf/Adora2b/Snai1/Has2/Plek/Slc7a11/Il6/Nr4a3/Ptgs2/Il1b	65
GO:0048660	regulation of smooth muscle cell proliferation	40/1595	163/23174	9.88538e-13	3.82609e-10	2.7102e-10	Smpd3/Il6ra/Adipoq/Igfbp5/Fgfr2/Edn1/Pparg/Cdkn1b/Pten/Foxj2/Ilk/Ddx39b/Ldlrap1/Gnai2/Trp53/Hmgcr/Nos3/Myd88/Igf1r/Ptafr/Pdgfb/Trib1/Sod2/Abcc4/Hmox1/Hif1a/Ptgir/Ccn4/Myc/Thbs1/Tnfaip3/Itga2/Adamts1/Mmp9/Tnf/Hbegf/Il6/Ereg/Nr4a3/Ptgs2	40
GO:0007162	negative regulation of cell adhesion	55/1595	283/23174	1.93938e-12	6.88075e-10	4.87396e-10	Tnr/Pla2g2d/Enpp2/Skint2/Srcin1/Sftpd/Adipoq/Angpt1/Pde3b/Mbp/Vtcn1/Pten/Cbfb/Sema4d/Map2k1/Cdh1/Bcar1/Adam15/Cblb/Dlc1/Cfl1/Sdc4/Trpv4/C1qtnf1/Cebpb/Tgfb1/Lrp1/Nrarp/Anxa1/Serpine2/Ubash3b/Coro1c/Lgals1/Zc3h12a/Arg2/Rnd1/Tacstd2/Nfkbid/Fgl2/Foxj1/Thbs1/Cyp1b1/Tnfaip3/Gcnt2/Lgals3/Il4ra/Slfn1/Fam107a/Dusp1/Serpine1/Cd44/Cd80/Adam8/Il1rn/Tarm1	55
GO:0050707	regulation of cytokine secretion	46/1595	212/23174	2.30428e-12	7.84837e-10	5.55938e-10	Lgr4/Lpl/Cidea/Angpt1/Cd36/Trim6/Mbp/Vtcn1/P2rx7/Gpam/Sptbn1/Mif/Crlf2/Nod2/Trpv4/Lrp1/Il17ra/Anxa1/Casp4/Cd209d/Zc3h12a/Akap12/Ccn4/Fermt1/Ccr5/Arg2/Cd200r1/Cd84/Cd244a/Tnfrsf1b/Tnfaip3/Clec5a/Il4ra/Tnf/Srgn/Fgr/Clec4n/Nlrp3/Ccl3/Il6/Mmp8/Il1b/Il1r2/Osm/Nlrp12/Clec4e	46
GO:0002683	negative regulation of immune system process	76/1595	470/23174	2.53646e-12	8.3069e-10	5.88417e-10	Pla2g2d/H2-Ob/Hoxa9/Skint2/Mill2/Sftpd/Adipoq/Lgr4/Inpp4b/Pparg/Angpt1/Sfrp1/Adgrf5/Vtcn1/Samhd1/Gpam/Tmem176a/Tmem176b/Cbfb/Mif/Cactin/Dhx58/Selenos/Sox9/Cblb/Zfp36l1/Arrb2/Sdc4/Nod2/Trim30a/Cebpb/Tgfb1/Nrarp/Nme1/Anxa1/Trib1/Fstl3/Fcgr2b/Hes1/Ubash3b/Nfkbia/Hmox1/Ada/Ldlr/Cd68/Padi2/Zc3h12a/Slit2/Pf4/Dusp10/Myc/Zfp36/Emilin1/Fcer1g/Arg2/Cd200r1/Cd84/Nfkbid/Fgl2/Foxj1/Thbs1/Tnfaip3/Lgals3/Il4ra/…	76
GO:0048659	smooth muscle cell proliferation	40/1595	168/23174	2.79675e-12	8.50511e-10	6.02458e-10	Smpd3/Il6ra/Adipoq/Igfbp5/Fgfr2/Edn1/Pparg/Cdkn1b/Pten/Foxj2/Ilk/Ddx39b/Ldlrap1/Gnai2/Trp53/Hmgcr/Nos3/Myd88/Igf1r/Ptafr/Pdgfb/Trib1/Sod2/Abcc4/Hmox1/Hif1a/Ptgir/Ccn4/Myc/Thbs1/Tnfaip3/Itga2/Adamts1/Mmp9/Tnf/Hbegf/Il6/Ereg/Nr4a3/Ptgs2	40
GO:0001503	ossification	66/1595	381/23174	3.1055e-12	9.11839e-10	6.45899e-10	Smpd3/Cited1/Chrdl2/Chrdl1/Bmp3/Lgr4/Igfbp5/Fgfr2/Dhrs3/Tnfrsf11a/Ptch1/Thrb/Sfrp1/Lrp4/Bcor/Slc26a2/P2rx7/Nipbl/Ddx5/Wwtr1/Lrp6/Ilk/Cbfb/Sema4d/Lmna/Creb3l1/Sox9/Acvr1/Fzd1/Id3/Bmp2k/Tmem38b/Cebpd/Sh3pxd2b/Cebpb/Tgfb1/Foxc1/Ecm1/Fstl3/Ccn2/Isg15/Hif1a/Stc1/Pdlim7/Gja1/Ccn4/Junb/Xylt1/Id1/Epha2/Ifitm5/Egr2/Fbn2/Clec5a/Noct/Csf1/Mmp9/Ccn1/Tnf/Ifitm1/Srgn/Fgr/Ccr1/Nfe2/Il6/Ptgs2	66
GO:1901342	regulation of vasculature development	61/1595	340/23174	4.49192e-12	1.27496e-09	9.03112e-10	Enpp2/Kit/Il6ra/Pparg/Itgb8/Cd36/Pde3b/Epn2/Gab1/Plcg1/Akt3/Egln1/Tlr3/Foxj2/Ephb4/Wars/Creb3l1/Nos3/Flt1/Spry2/Foxc1/Col4a2/Ecm1/Plk2/Anxa1/Pdgfb/Spred1/Adm/Sod2/Adam12/Hmox1/Hif1a/Klf2/Ecscr/Zc3h12a/Adamts9/Btg1/Ccl11/Pf4/Ddah1/Adgra2/Emilin1/Itga5/Itgb2/Id1/Epha2/Thbs1/Cyp1b1/Lif/Lgals3/Sphk1/Adamts1/Mmp9/C5ar1/Serpine1/Cxcr4/Ccl2/Ptgs2/Il1b/Cxcr2/Prok2	61
GO:0002526	acute inflammatory response	33/1595	122/23174	5.41431e-12	1.48719e-09	1.05345e-09	Adra2a/F8/Orm2/Pparg/Cd55/Tnfrsf11a/Mif/Selenos/Acvr1/Fcgr3/Fcgr2b/Itih4/Icam1/Alox5/Cd163/Ccr5/Fcgr1/Fcer1g/Alox5ap/C2cd4b/Saa3/Tnf/Serpina3n/Cxcl1/Reg3g/Adam8/Nlrp3/Il6/Ptgs2/Il1b/Cxcr2/Il1rn/Trem1	33
GO:0072593	reactive oxygen species metabolic process	54/1595	288/23174	1.32131e-11	3.23138e-09	2.28894e-09	Smpd3/Duoxa1/Edn1/Cd36/Sirt3/P2rx7/Arf4/Gnai2/Rac1/Selenos/Trp53/Dynll1/Eif5a/Eif6/Nos3/Sh3pxd2b/Trim30a/Birc3/Ddit4/Tgfb1/Tmem106a/Pdgfb/Sod2/Ccn2/Ripk3/Ier3/Hif1a/Gla/Klf2/Vav1/Zc3h12a/Nrros/Icam1/Ncf2/Ddah1/Mmp3/Pid1/Ncf4/Arg2/Itgb2/Thbs1/Cyp1b1/Cd177/Ccn1/Tnf/Itgam/Cxcl1/Il6/Fpr2/Mmp8/Ptgs2/Il1b/Ptx3/Acod1	54
GO:0040013	negative regulation of locomotion	59/1595	331/23174	1.32822e-11	3.23138e-09	2.28894e-09	Robo2/Limch1/Adipoq/Igfbp5/Podn/Dach1/Sema6c/Pparg/Scai/Sfrp1/Tcaf1/Pten/Ilk/Trim28/Mif/Sema4d/Arhgdia/Ptpn23/Cdh1/Adam15/Apex1/Sema4c/Srf/Dlc1/Ptprg/Cfl1/Trim8/Clic4/Sema3f/Tgfb1/Rap2b/Lrp1/Pdgfb/Trib1/Spred1/Sema6b/Olfm1/Ada/Stc1/Coro1c/Padi2/Adamts9/Slit2/Dusp10/Sema7a/Ccr5/Emilin1/Cd200r1/Tacstd2/Thbs1/Cyp1b1/Trim15/Nrg1/Dusp1/Serpine1/Timp1/Ccl12/Il24/Il1rn	59
GO:0051271	negative regulation of cellular component movement	57/1595	315/23174	1.58583e-11	3.67969e-09	2.6065e-09	Limch1/Adipoq/Igfbp5/Podn/Dach1/Sema6c/Pparg/Scai/Sfrp1/Cdkn1b/Tcaf1/Pten/Ilk/Mif/Sema4d/Arhgdia/Ptpn23/Cdh1/Adam15/Apex1/Sema4c/Srf/Dlc1/Ptprg/Cfl1/Clic4/Sema3f/Tgfb1/Rap2b/Lrp1/Pdgfb/Actn1/Trib1/Spred1/Sema6b/Olfm1/Ada/Stc1/Coro1c/Padi2/Adamts9/Slit2/Dusp10/Sema7a/Ccr5/Emilin1/Cd200r1/Tacstd2/Thbs1/Cyp1b1/Nrg1/Dusp1/Serpine1/Timp1/Ccl12/Il24/Il1rn	57
GO:2000377	regulation of reactive oxygen species metabolic process	43/1595	200/23174	1.64122e-11	3.67969e-09	2.6065e-09	Smpd3/Duoxa1/Cd36/Sirt3/Arf4/Gnai2/Rac1/Selenos/Trp53/Dynll1/Eif5a/Eif6/Trim30a/Birc3/Tgfb1/Tmem106a/Pdgfb/Sod2/Ripk3/Ier3/Hif1a/Gla/Klf2/Zc3h12a/Icam1/Ddah1/Mmp3/Pid1/Arg2/Itgb2/Thbs1/Cyp1b1/Cd177/Tnf/Itgam/Cxcl1/Il6/Fpr2/Mmp8/Ptgs2/Il1b/Ptx3/Acod1	43
GO:1990868	response to chemokine	24/1595	70/23174	1.72857e-11	3.67969e-09	2.6065e-09	Dock8/Slc12a2/Foxc1/Padi2/Zc3h12a/Slit2/Ccl11/Pf4/Ackr1/Ccl9/Ccl6/Gpr35/Dusp1/Cxcr4/Cxcl1/Ccr1/Ccl12/Ppbp/Ccl2/Ccl3/Ccl4/Cxcl3/Cxcl2/Cxcl5	24
GO:1990869	cellular response to chemokine	24/1595	70/23174	1.72857e-11	3.67969e-09	2.6065e-09	Dock8/Slc12a2/Foxc1/Padi2/Zc3h12a/Slit2/Ccl11/Pf4/Ackr1/Ccl9/Ccl6/Gpr35/Dusp1/Cxcr4/Cxcl1/Ccr1/Ccl12/Ppbp/Ccl2/Ccl3/Ccl4/Cxcl3/Cxcl2/Cxcl5	24
GO:0050673	epithelial cell proliferation	69/1595	424/23174	1.94059e-11	4.03027e-09	2.85483e-09	Gdf5/Kit/Prox1/Lgr4/Igfbp5/Fgfr2/Pparg/Pik3cb/Itpr1/Ptch1/Sfrp1/Vdr/Nfib/Cdkn1b/Lims2/Ift172/Irf6/Plcg1/Akt3/Kif3a/Pten/Lrp6/Phb2/Map2k1/Cdh1/Wdr77/Sox9/Tgfa/Adam17/Zfp36l1/Dysf/Flt1/Nod2/Cebpb/Tgfb1/Nrarp/Ecm1/Nme1/Pdgfb/Hes1/Hmox1/Gja1/Ccl11/Dusp10/Myc/Uhrf1/Fermt1/Errfi1/Zfp36/Sfn/Tacstd2/Scn5a/Id1/Epha2/Thbs1/Tnfaip3/Nr4a1/Tnf/Adora2b/Etv4/C5ar1/Cyp7b1/Has2/Reg3g/Ccl12/Ccl2/Il6/Ereg/Nr4a3	69
GO:0019216	regulation of lipid metabolic process	59/1595	336/23174	2.50046e-11	4.95149e-09	3.50738e-09	Smpd3/Adra2a/Kit/Ephx2/Prox1/Adipoq/Zbtb20/Nr1d2/Pik3ip1/Lgals12/Nucb2/Cidea/Prkaa2/Rorc/Dbi/Pparg/Cd36/Pde3b/Crebl2/Thrb/Slc27a1/Vdr/Appl2/Nr3c1/Adgrf5/Rubcn/Sec14l2/Gpam/Pik3r4/Stub1/Rac1/Acsl5/Samd8/Eif6/Flt1/Nod2/Rdh10/Tgfb1/Igf1r/Trib3/Anxa1/Pdgfb/Ttc39b/Ldlr/Pdgfa/Gpr39/Fabp5/Pik3r5/Sphk1/Ccn1/Tnf/Adora2b/Snai1/Fgr/Hcar2/Fpr2/Nr4a3/Ptgs2/Il1b	59
GO:0002274	myeloid leukocyte activation	44/1595	211/23174	2.80425e-11	5.30626e-09	3.75867e-09	Kit/Pparg/Adgrf5/Tlr3/Pja2/Ltbr/Ywhaz/Pi4k2a/Crlf2/Dysf/Tgfb1/Ptafr/Tmem106a/Fcgr3/Lat2/Hmox1/Ldlr/Relb/Lcp2/Spi1/Fcer1g/Cd84/Itgb2/Thbs1/Cd244a/Cd177/Sphk1/Il4ra/Cd300lb/Tnf/Adora2b/Slc11a1/C5ar1/Itgam/Stx11/Fgr/Il18rap/Fpr2/Mmp8/Nr4a3/Cxcr2/Cd300lf/Clec4d/Cxcl5	44
GO:0045785	positive regulation of cell adhesion	67/1595	410/23174	3.15187e-11	5.71025e-09	4.04484e-09	Prkcq/Enpp2/Ecm2/Il6ra/Angpt1/Cd36/Dock8/Lims2/Vtcn1/Gpam/Utrn/Ilk/Ephb4/Cbfb/Arpc2/Ptpn23/Cdh1/Rac1/Shb/Cfl1/Dysf/Sdc4/Hacd1/Tgfb1/Ptafr/Ninj1/Anxa1/Tnfrsf18/Fstl3/Hes1/Ada/Lgals1/Myb/S100a10/Vav1/Icam1/Dusp10/Fermt1/Ccr5/Emilin1/Itga5/Itgb2/Nfkbid/Thbs1/Cd244a/Gcnt2/Itga2/Il4ra/Csf1/Ccn1/Pdpn/Selp/Tnf/Cd209e/Emilin2/Cass4/Has2/Cd44/Il23a/Cd80/Adam8/Nlrp3/Ccl2/Il6/Nr4a3/Il1b/Olfm4	67
GO:0042326	negative regulation of phosphorylation	71/1595	451/23174	4.73128e-11	8.3931e-09	5.94523e-09	Srcin1/Adipoq/Pik3ip1/Prkar2b/Angpt1/Mapk8ip1/Pkia/Pde2a/Sfrp1/Cdkn1b/Sirt3/Atxn1/Rubcn/Ncor1/P2rx7/Pten/Fktn/Wwtr1/Lrp6/Rtraf/Ilk/Sema4d/Cactin/Wars/Pde12/Midn/Shb/Cblb/Hmgcr/Dynll1/Ppif/Arrb2/Spry2/Actb/Tnip1/Birc3/Ddit4/Tgfb1/Igf1r/Trib3/Gadd45g/Rasip1/Trib1/Spred1/Pmepa1/Ppp1r15a/Ier3/Ubash3b/Coro1c/Zc3h12a/Dusp5/Dusp4/Spry4/Slit2/Dusp10/Dusp6/Errfi1/Dok2/Emilin1/Pid1/Fam72a/Tnfaip3/Socs3/Gad…	71
GO:0033028	myeloid cell apoptotic process	17/1595	37/23174	6.79317e-11	1.18049e-08	8.36194e-09	Adipoq/Pik3cb/Pten/Mif/Selenos/Adam17/Nod2/Anxa1/Fcgr2b/Ccr5/Fcer1g/Clec5a/Cd44/Hcar2/Slc7a11/Il6/Cxcr2	17
GO:1903034	regulation of response to wounding	39/1595	178/23174	7.83321e-11	1.30784e-08	9.26404e-09	Tnr/Prkcq/Adra2a/Tspan8/Cd36/Cdkn1b/Neo1/Ptprf/Pten/Arfgef1/Mif/Map2k1/Hmgcr/Adam17/C1qtnf1/Igf1r/Lrp1/Anxa1/Pdgfb/Serpine2/Ubash3b/Pdgfa/Gja1/Tpsab1/Ccn4/Dusp10/Fcer1g/Xylt1/Anxa2/Thbs1/Pdpn/Selp/Serpine1/Cxcr4/Reg3g/Plek/Hbegf/Ccl2/S100a9	39
GO:0050920	regulation of chemotaxis	43/1595	212/23174	1.20045e-10	1.96574e-08	1.39243e-08	Ccr6/Robo2/Edn1/Sema6c/Dapk2/Zswim8/Mif/Sema4d/Rac1/Sema4c/Zswim4/Adam17/Dysf/Sema3f/Nod2/Trpv4/Tgfb1/Pdgfb/Sema6b/Cmklr1/Lgmn/Pla2g7/Padi2/Slit2/Adgra2/Sema7a/Thbs1/Artn/Itga2/Bst1/Csf1/C5ar1/Dusp1/Serpine1/Cxcr4/Ccr1/Il23a/Ccl12/Ccl2/Fpr2/Ccl4/Il1b/Cxcr2	43
GO:2000106	regulation of leukocyte apoptotic process	29/1595	108/23174	1.2558e-10	2.01758e-08	1.42914e-08	Prkcq/Rorc/Pik3cb/Dock8/P2rx7/Gpam/Pten/Mif/Selenos/Trp53/Adam17/Nod2/Anxa1/Fcgr2b/Ripk3/Ada/Hif1a/Myc/Ccr5/Fcer1g/Arg2/Nfkbid/Lgals3/Cd44/Adam8/Hcar2/Slc7a11/Nr4a3/Cxcr2	29
GO:0051222	positive regulation of protein transport	68/1595	433/23174	1.35546e-10	2.11973e-08	1.5015e-08	Chrm1/Prkcq/Chp2/Lpl/Exph5/Cnst/Cd36/Trim6/Crebrf/Mpc2/Cd2ap/Cacnb3/Sirt3/Mbp/Pfkfb2/Vtcn1/Tcaf1/P2rx7/Kif3a/Sptbn1/Trim28/Mif/Arpc2/Ptpn23/Bag3/Cdh1/Rac1/Nutf2/Nlgn2/Crlf2/Dynll1/Frmd4a/Nod2/Trpv4/Ran/Tgfb1/Lrp1/Il17ra/Casp4/Cd209d/Hif1a/Gja1/Gpr39/Zc3h12a/Akap12/Fermt1/Trpm2/Ccr5/Sfn/Cd84/Cd244a/Clec5a/Plk3/Il4ra/Tnf/Ankrd1/Fgr/Clec4n/Hcar2/Nlrp3/Ccl2/Ccl3/Il6/Mmp8/Ptgs2/Il1b/Osm/Clec4e	68
GO:1904951	positive regulation of establishment of protein localization	70/1595	452/23174	1.36917e-10	2.11973e-08	1.5015e-08	Chrm1/Prkcq/Chp2/Lpl/Exph5/Cnst/Cd36/Trim6/Crebrf/Mpc2/Cd2ap/Cacnb3/Sirt3/Mbp/Pfkfb2/Vtcn1/Tcaf1/P2rx7/Kif3a/Sptbn1/Trim28/Mif/Arpc2/Ptpn23/Bag3/Cdh1/Rac1/Nutf2/Nlgn2/Crlf2/Cct3/Dynll1/Frmd4a/Nod2/Trpv4/Ran/Tgfb1/Lrp1/Il17ra/Casp4/Cd209d/Hif1a/Gja1/Gpr39/Zc3h12a/Akap12/Pmaip1/Fermt1/Trpm2/Ccr5/Sfn/Cd84/Cd244a/Clec5a/Plk3/Il4ra/Tnf/Ankrd1/Fgr/Clec4n/Hcar2/Nlrp3/Ccl2/Ccl3/Il6/Mmp8/Ptgs2/Il1b/Osm/Cl…	70
GO:1901652	response to peptide	62/1595	383/23174	2.54268e-10	3.54934e-08	2.51416e-08	Smpd3/Cited1/Prkcq/C1qtnf9/Sesn3/Adipoq/Lpl/Nucb2/Cacnb1/Cry2/Pparg/Cd36/Pde3b/Cish/Slc27a1/Appl2/Adcy6/Phip/Akt3/Ptprf/Epm2aip1/Gpam/Pten/Dennd4c/Opa1/Ybx1/Gnai2/Bcar1/Ywhag/Trp53/Rangap1/Cfl1/Zfp36l1/Eif6/Nod2/Trpv4/Igf1r/Lrp1/Trib3/Anxa1/Timeless/Fcgr2b/Rab8b/Casp4/Nfkbia/Sh2b2/Lgmn/Nr4a2/Icam1/Sgk1/Pid1/Egr2/Tnfaip3/Socs3/Nr4a1/Mmp9/Serpina3n/Gdf15/Reg3g/Fpr2/Nr4a3/Il1b	62
GO:0051348	negative regulation of transferase activity	46/1595	242/23174	2.67845e-10	3.67855e-08	2.60569e-08	Srcin1/Adipoq/Pik3ip1/Prkar2b/Pparg/Mapk8ip1/Pkia/Sfrp1/Cdkn1b/Rubcn/Pten/Wwtr1/Lrp6/Rtraf/Ilk/Wars/Midn/Trp53/Shb/Limk1/Cblb/Hmgcr/Spry2/Actb/Igf1r/Trib3/Gadd45g/Rasip1/Trib1/Spred1/Ubash3b/Coro1c/Dusp5/Dusp4/Spry4/Dusp10/Dusp6/Errfi1/Zfp36/Fam72a/Tnfaip3/Gadd45b/Gprc5a/Dusp1/Il6/Il1b	46
GO:0090407	organophosphate biosynthetic process	74/1595	498/23174	2.84057e-10	3.77928e-08	2.67705e-08	Pigz/Acsl1/Plcl1/Cmpk2/Hmgcs2/Zbtb20/Prkaa2/Plce1/Prxl2c/Gucy1a1/Aldoc/Far1/Pik3cb/Slc27a1/Mpc2/Dgka/Pik3c2b/Plaat3/Adcy6/Adgrf5/Pigg/Pfkfb2/Plcg1/Ncor1/Rrm2b/Pank3/P2rx7/Gpam/Coasy/Foxk1/Mif/Mboat7/Map2k1/Pi4k2a/Acsl5/Pgam1/Samd8/Trp53/Adpgk/Pgs1/Ampd2/Eif6/Nos3/Ak2/Aprt/Agpat5/Ppat/Tmem38b/Eno2/Ddit4/Tgfb1/Ptafr/Entpd1/Rrm2/Nme1/Pdgfb/Adcyap1r1/Agpat4/Ier3/Ada/Ctps/Hif1a/Ak1/Pdgfa/Myc/Fabp5/Pid…	74
GO:0010876	lipid localization	60/1595	366/23174	2.96764e-10	3.88761e-08	2.75378e-08	Pla2g2d/Abca8a/Abca8b/Abca6/Osbpl6/Acsl1/Adipoq/Atp10b/Lpl/Abca9/Nucb2/Cry2/Cidea/Edn1/Pparg/Slco2b1/Cd36/Tnfrsf11a/Vldlr/Ptch1/Slc27a1/Stoml1/Pnpla8/Relch/Ncor1/P2rx7/Lrp6/Mif/Plekha3/Ldlrap1/Acsl5/Sigmar1/Dysf/C1qtnf1/Abcc1/Ehd1/Lrp1/Atp8b1/Anxa1/Ttc39b/Abcc4/Nfkbia/Ldlr/Ikbke/Soat1/Zc3h12a/Hilpda/Lipg/Slc10a6/Mfsd2a/Atp8b4/Anxa2/Thbs1/Tnf/Atp8b5/Msr1/Cyp4f18/Soat2/Il1b/Inhba	60
GO:0050678	regulation of epithelial cell proliferation	59/1595	357/23174	3.01675e-10	3.88927e-08	2.75496e-08	Gdf5/Prox1/Fgfr2/Pparg/Itpr1/Ptch1/Sfrp1/Vdr/Nfib/Cdkn1b/Lims2/Ift172/Plcg1/Akt3/Kif3a/Pten/Lrp6/Phb2/Cdh1/Wdr77/Sox9/Tgfa/Adam17/Zfp36l1/Dysf/Flt1/Nod2/Tgfb1/Nrarp/Ecm1/Nme1/Pdgfb/Hes1/Hmox1/Gja1/Ccl11/Dusp10/Myc/Uhrf1/Errfi1/Zfp36/Sfn/Tacstd2/Scn5a/Id1/Thbs1/Tnfaip3/Nr4a1/Tnf/Adora2b/Etv4/C5ar1/Cyp7b1/Has2/Reg3g/Ccl12/Ccl2/Il6/Nr4a3	59
GO:0042110	T cell activation	73/1595	491/23174	3.65761e-10	4.58008e-08	3.24429e-08	Pla2g2d/Ccr6/Prkcq/Skint2/Mill2/Kit/Sftpd/Il6ra/Bcl11a/Rorc/Mapk8ip1/Satb1/Dock8/Vtcn1/Ncor1/P2rx7/Gpam/Ephb4/Cbfb/Trp53/Shb/Srf/Cblb/Kat2a/Adam17/Zfp36l1/Sdc4/Cebpb/Tgfb1/Nrarp/Gadd45g/Anxa1/Hes1/Bcl3/Ripk3/Ada/Ctps/Relb/Lgals1/Myb/Gja1/Msn/Vav1/Zc3h12a/Icam1/Dusp10/Fcer1g/Arg2/Itgb2/Nfkbid/Fgl2/Foxj1/Cd244a/Tnfrsf1b/Lgals3/Il4ra/Cd209e/Slfn1/Slc11a1/Itgam/Stx11/Cxcr4/Cd44/Il23a/Cd80/Adam8/Nlrp3…	73
GO:0045598	regulation of fat cell differentiation	32/1595	135/23174	4.6861e-10	5.70031e-08	4.0378e-08	Mmp11/Adipoq/Lpl/Lgals12/Nucb2/Rorc/Wnt5b/Pparg/Crebl2/Sfrp1/Taf8/Wwtr1/Lrp6/Zfp36l1/Trpv4/Adig/Sh3pxd2b/Cebpb/Tgfb1/Trib3/Jdp2/Hes1/Cmklr1/Sod2/Metrnl/Zc3h12a/Ccn4/Dusp10/Zfp36/Noct/Tnf/Ptgs2	32
GO:0022612	gland morphogenesis	34/1595	150/23174	4.86723e-10	5.82803e-08	4.12827e-08	Prox1/Igfbp5/Fgfr2/Itpr1/Ptch1/Sfrp1/Vdr/Nfib/Slc12a2/Lims2/Nr3c1/Zfp157/Lrp6/Phb2/Cdh1/Sox9/Tgfa/Cebpb/Tgfb1/Igf1r/Pdgfb/Etv5/Pdgfa/Msn/Slit2/Ccl11/Epha2/Tnfaip3/Csf1/Tnf/Etv4/Cyp7b1/Cd44/Il6	34
GO:0009611	response to wounding	73/1595	495/23174	5.2897e-10	6.08673e-08	4.31152e-08	Tnr/Prkcq/Adra2a/F8/Tspan8/Cd36/Ppl/Pik3cb/Cdkn1b/Neo1/Arhgap35/Ptprf/Dst/Pten/Arfgef1/Mif/Map2k1/Map2k4/Srf/Ifrd1/Hmgcr/Plec/Adam17/Zfp36l1/Dysf/Sdc4/C1qtnf1/Mir22hg/Tgfb1/Rap2b/Igf1r/Lrp1/Ninj1/Entpd1/Sdc1/Anxa1/Pdgfb/Serpine2/Adm/Sod2/Ubash3b/Hmox1/Hif1a/Pdgfa/Gja1/Tpsab1/Pf4/Ccn4/Dusp10/Zfp36/Fcer1g/Xylt1/Anxa2/Thbs1/Tnfaip3/Ccn1/Pdpn/Selp/Rtn4rl2/Slc11a1/Serpine1/Timp1/Cxcr4/Reg3g/Cd44/Plek/…	73
GO:0001763	morphogenesis of a branching structure	45/1595	240/23174	6.61733e-10	7.30743e-08	5.1762e-08	Prox1/Lgr4/Fgfr2/Bcl11a/Edn1/Angpt1/Ptch1/Rere/Sfrp1/Vdr/Slc12a2/Lrp6/Ilk/Phb2/Cdh1/Srf/Sox9/Acvr1/Clic4/Flt1/Spry2/Rdh10/Cpe/Tgfb1/Nrarp/Rasip1/Col4a1/Pdgfb/Timeless/Adm/Etv5/Pdgfa/Slit2/Ccl11/Myc/Tacstd2/Epha2/Socs3/Csf1/Tnf/Etv4/Cxcr4/Cd44/Il6/Il1b	45
GO:0044403	symbiont process	58/1595	355/23174	6.69383e-10	7.30743e-08	5.1762e-08	Sftpd/Prox1/Zfp72/Gucy1a1/Rnasel/Gbp3/Cd36/Trim6/Chmp4c/Ulk2/Ddx5/Chmp4b/Ddx39b/Pcbp1/Trim28/Banf1/Ppib/Eif3b/Pde12/Kpna2/Trp53/Slc20a2/Rrp1b/Pfn1/P4hb/Cfl1/Trim8/Myd88/Nod2/Tnip1/Trim30a/Tgfb1/Ifitm3/Ripk3/Isg15/Ifitm2/Lgals1/Oasl1/Zc3h12a/Icam1/Pf4/Myc/Zfp36/Ccr5/Anxa2/Trim15/Oas3/Mmp9/Tnf/Ifitm1/Ifitm6/Cxcr4/Cxcl1/Ccl4/Ptx3/Cxcl5/Trem1/Trem3	58
GO:0001818	negative regulation of cytokine production	47/1595	258/23174	7.52892e-10	7.91466e-08	5.60633e-08	Sftpd/Adipoq/Lgr4/Cidea/Pparg/Angpt1/Cd2ap/Appl2/Tia1/Cactin/Rac1/Nutf2/Dhx58/Selenos/Arrb2/Nod2/Trim30a/Tgfb1/Anxa1/Fcgr2b/Cmklr1/Bcl3/Hmox1/Relb/Klf2/Zc3h12a/Errfi1/Zfp36/Arg2/Cd200r1/Cd84/Foxj1/Epha2/Thbs1/Tnfaip3/Prg4/Tnf/Slc11a1/Srgn/Il23a/Nlrp3/Il6/Mmp8/Mefv/Il1r2/Nlrp12/Acod1	47
GO:0050764	regulation of phagocytosis	27/1595	102/23174	7.69064e-10	7.98607e-08	5.65691e-08	Sftpd/Adipoq/Pparg/Cd36/Appl2/Pten/Atg3/Dysf/Lyar/Nod2/Tgfb1/Lrp1/Fcgr3/Fcgr2b/Siglece/Fcgr1/Fcer1g/Itga2/Sphk1/Tnf/Slc11a1/Fgr/Ccl2/Fpr2/Il1b/Cd300lf/Ptx3	27
GO:2001234	negative regulation of apoptotic signaling pathway	43/1595	229/23174	1.50604e-09	1.3939e-07	9.87369e-08	Bmf/Dapk1/Mapk8ip1/Asah2/Tmbim1/Phip/Rrm2b/Birc6/Opa1/Mif/Psme3/Map2k1/Gnai2/Lmna/Creb3l1/Selenos/Slc35f6/Mcl1/Syvn1/Acvr1/Ppif/Arrb2/Nle1/Sod2/Ier3/Hyou1/Hmox1/Hif1a/Nr4a2/Icam1/Pf4/Tnfrsf23/Tnfaip3/Lgals3/Mmp9/Tnf/Snai1/Bdnf/Serpine1/Cd44/Plaur/Ptgs2/Il1b	43
GO:0042254	ribosome biogenesis	49/1595	283/23174	1.96309e-09	1.79738e-07	1.27317e-07	Rnasel/Cul4b/Pten/Rps2/Rsl24d1/Rpl10a/Ddx56/Usp36/Utp18/Mrpl20/Noc4l/Nol6/Nob1/Ebna1bp2/Pak1ip1/Exosc2/Rpl7l1/Ltv1/Nat10/Rrp8/Bop1/Rrp1b/Ddx21/Ftsj3/Ddx28/Rrp15/Sdad1/Nip7/Eif6/Naf1/Mrto4/Zfp593/Nhp2/Nop2/Rpf2/Rrs1/Nop16/Lyar/Mybbp1a/Rrp9/Bysl/Nop58/Ran/Nle1/Las1l/Ppan/Heatr1/Gar1/Nop56	49
GO:0097193	intrinsic apoptotic signaling pathway	50/1595	292/23174	1.98747e-09	1.80036e-07	1.27528e-07	Lgals12/Dapk2/Mapk8ip1/Itpr1/Prkra/Dyrk2/Rrm2b/Ddx5/Opa1/Mif/Erp29/Map2k1/Hint1/Creb3l1/Selenos/Trp53/Rrp8/Atf4/Mcl1/P4hb/Syvn1/Aen/Ppif/Mybbp1a/Cebpb/Ddit4/Trib3/Casp4/Bcl3/Sod2/Ripk3/Ier3/Hyou1/Hmox1/Hif1a/Ikbke/Pmaip1/Myc/Sfn/Epha2/Tnfrsf1b/Cyp1b1/Mmp9/Tnf/Snai1/Cd44/Plaur/Ptgs2/S100a8/S100a9	50
GO:0071706	tumor necrosis factor superfamily cytokine production	35/1595	166/23174	2.14178e-09	1.91971e-07	1.35982e-07	Adipoq/Zbtb20/Lpl/Cidea/Angpt1/Cd36/Tlr3/Mif/Cactin/Selenos/Arrb2/Myd88/Nod2/Trim30a/Ptafr/Tmem106a/Fcgr3/Bcl3/Zc3h12a/Akap12/Pf4/Errfi1/Zfp36/Ccr5/Fcer1g/Arg2/Cd84/Thbs1/Tnfaip3/Il23a/Adam8/Ccl2/Ccl3/Mmp8/Ccl4	35
GO:0051090	regulation of DNA-binding transcription factor activity	61/1595	395/23174	2.34719e-09	2.06045e-07	1.45951e-07	Prkcq/Cys1/Kit/Prox1/Edn1/Pparg/Cd36/Tnfrsf11a/Ptch1/Ripk4/Egln1/Pten/Tlr3/Lrp6/Phb2/Cactin/Nfkbib/Srf/Ifrd1/Tmem173/Trim8/Arrb2/Myd88/Fzd1/Pim1/Id3/Nod2/Glis2/Tgfb1/Igf1r/Trib1/Fcgr2b/Cmklr1/Ripk3/Nfam1/Nfkbia/Hmox1/Adgrg3/Zc3h12a/Icam1/Cd84/Itgb2/Nfkbid/Id1/Foxj1/Cyp1b1/Tnfaip3/Trim15/Sphk1/Tnf/Bdnf/Fosl1/Ngf/Il18rap/Adam8/Csf3/Nlrp3/Il6/Il1b/Nlrp12/Acod1	61
GO:0043900	regulation of multi-organism process	62/1595	405/23174	2.46111e-09	2.13841e-07	1.51473e-07	Mill2/Sftpd/Prox1/Zfp72/Rnasel/Pde3a/Cd36/Trim6/Chmp4c/Ddx5/Chmp4b/Trim28/Banf1/Mif/Cactin/Ppib/Pde12/Dhx58/Kpna2/Shb/Traf3ip2/Rrp1b/Pfn1/P4hb/Cfl1/Tmem173/Trim8/Myd88/Nod2/Trim30a/Ptafr/Trib1/Ifitm3/Isg15/Ada/Ifitm2/Lgals1/Oasl1/Zc3h12a/Zfp36/Ccr5/Arg2/Cd84/Fgl2/Anxa2/Tnfaip3/Trim15/Oas3/Tnf/Ifitm1/Ifitm6/Timp1/Cxcr4/Cxcl1/Treml4/Il23a/Ccl4/Il1b/Inhba/Ptx3/Cxcl5/Acod1	62
GO:1901653	cellular response to peptide	49/1595	286/23174	2.82118e-09	2.36527e-07	1.67543e-07	Smpd3/Prkcq/C1qtnf9/Sesn3/Adipoq/Lpl/Nucb2/Cacnb1/Pparg/Cd36/Pde3b/Cish/Appl2/Adcy6/Phip/Akt3/Ptprf/Gpam/Pten/Dennd4c/Opa1/Ybx1/Gnai2/Bcar1/Ywhag/Trp53/Rangap1/Cfl1/Zfp36l1/Nod2/Igf1r/Lrp1/Trib3/Timeless/Fcgr2b/Rab8b/Casp4/Sh2b2/Lgmn/Nr4a2/Icam1/Sgk1/Pid1/Socs3/Nr4a1/Gdf15/Fpr2/Nr4a3/Il1b	49
GO:0003018	vascular process in circulatory system	39/1595	200/23174	2.83332e-09	2.36527e-07	1.67543e-07	Smpd3/Adra2a/Per2/Edn1/Atp1a2/Angpt1/Gucy1a1/Pde3a/Pde2a/Adcy6/Nr3c1/Arhgap42/Arhgap35/Map2k1/Hmgcr/Nos3/Ece1/Trpv4/Tgfb1/Foxc1/Manf/Ptafr/Pdgfb/Adm/Sod2/Hif1a/Gja1/Dusp5/Akap12/Icam1/Alox5/Slit2/Ddah1/C2cd4b/Tnf/Adora2b/Ccl4/Ptgs2/Cxcr2	39
GO:0002367	cytokine production involved in immune response	26/1595	102/23174	3.79052e-09	3.07393e-07	2.17741e-07	Kit/Tril/Angpt1/Cd36/Gprc5b/Trim6/Tlr3/Mif/Crlf2/Ddx21/Nod2/Tgfb1/Hmox1/Sema7a/Il1r1/Fcer1g/Tnfrsf1b/Tnf/Slc11a1/Il18rap/Nlrp3/Il6/Nr4a3/Il1b/Trem1/Trem3	26
GO:1905954	positive regulation of lipid localization	24/1595	89/23174	4.44757e-09	3.53935e-07	2.50709e-07	Adipoq/Lpl/Nucb2/Cidea/Edn1/Cd36/Tnfrsf11a/Ptch1/P2rx7/Mif/Ldlrap1/Acsl5/C1qtnf1/Ehd1/Lrp1/Nfkbia/Ikbke/Zc3h12a/Hilpda/Lipg/Anxa2/Msr1/Cyp4f18/Il1b	24
GO:0002237	response to molecule of bacterial origin	58/1595	376/23174	6.03976e-09	4.59183e-07	3.25261e-07	Cited1/Cmpk2/Plscr4/Cd36/Tnfrsf11a/Pde2a/Trim6/P2rx7/Mif/Cactin/Rps6ka3/Nfkbib/Selenos/Adam17/Nos3/Myd88/Nod2/Cebpb/Tgfb1/Ptafr/Trib1/Adm/Fcgr2b/Nfkbia/Cd68/Pde4b/Zc3h12a/Ptgir/Ncf2/Pf4/Dusp10/Junb/Zfp36/Cd84/Tnfrsf1b/Tnfaip3/Noct/Cd300lb/Tnf/Ankrd1/Slc11a1/Tnip3/C5ar1/Serpine1/Cxcl1/Cd80/Ccl12/Ppbp/Nlrp3/Ccl2/Il6/Ptgs2/Il1b/Il1rn/Cxcl3/Cxcl2/Cxcl5/Acod1	58
GO:0031346	positive regulation of cell projection organization	67/1595	464/23174	6.47841e-09	4.88174e-07	3.45797e-07	Prkcq/Robo2/Enpp2/Kit/Prom2/Bcl11a/Cdkl5/Gprc5b/Vldlr/Itpr1/Ppp1r9a/Nr3c1/Arhgap35/Ttbk2/Kidins220/Ptprf/P2rx7/Mfn1/Lrp6/Opa1/Ilk/Mif/Llph/Sema4d/Arpc2/Map2k1/Ddx56/Rac1/Sept9/Nlgn2/Srf/Ranbp1/Limk1/Kat2a/Pfn1/Adam17/Cfl1/Dynll1/Fzd1/Picalm/Ehd1/Igf1r/Eps8/Lrp1/Map1b/Plek2/Nme1/Serpine2/Enc1/Rab8b/Coro1c/Cdc42ep2/Gm14137/Sgk1/Sema7a/Lif/Itga2/Sphk1/Adamts1/Nrg1/Ankrd1/Bdnf/Cxcr4/Ngf/Il6/S100a9/Cx…	67
GO:0001701	in utero embryonic development	70/1595	498/23174	9.23037e-09	6.63854e-07	4.7024e-07	Dsc3/Cited1/Tet1/Fgfr2/Edn1/Sox6/Angpt1/Ptch1/Ncoa1/Wdr19/Epn2/Gab1/Lpar6/Rpgrip1l/Tanc2/Bcor/Kidins220/Plcg1/C2cd3/Egln1/Birc6/Kif3a/Taf8/Ybx1/Mbd3/Psmc4/Trim28/Mafg/Eif2s2/Map2k1/Mdfi/Slc39a1/Cdh1/Krt19/Trp53/Rpl7l1/Srf/Erf/Kat2a/Syvn1/Zfp36l1/Nos3/Acvr1/Nop2/Rdh10/Bysl/Nle1/Krt8/Cebpb/Foxc1/Pdgfb/Adm/Hes1/Ada/Hif1a/Myb/Klf2/Gja1/Slit2/Junb/Maff/Tm4sf1/Ifitm5/Socs3/Lif/Ccn1/Snai1/Hbegf/Fosl1/Nf…	70
GO:0034404	nucleobase-containing small molecule biosynthetic process	34/1595	167/23174	9.27759e-09	6.63854e-07	4.7024e-07	Zbtb20/Prkaa2/Prxl2c/Aldoc/Nudt7/Pde2a/Pfkfb2/Nudt12/Ncor1/P2rx7/Samhd1/Foxk1/Mif/Hint1/Entpd7/Pgam1/Trp53/Adpgk/Eif6/Aprt/Eno2/Ddit4/Entpd1/Nme1/Ier3/Ada/Ctps/Hif1a/Ak1/Ncf2/Myc/Upp1/Nt5e/Hk3	34
GO:0048608	reproductive structure development	65/1595	449/23174	9.8346e-09	6.97847e-07	4.94318e-07	Cited1/Hoxa9/Kit/Lgr4/Fgfr2/Pparg/Angpt1/Ncoa1/Sfrp1/Wdr19/Cdkn1b/Gab1/Map3k4/Atrx/Egln1/Birc6/Nipbl/Pten/Fndc3a/Lrp6/Trim28/Eif2s2/Map2k1/Mdfi/Cdh1/Krt19/Wdr77/Erf/Sox9/Zfp36l1/Nos3/Arrb2/Rdh10/Krt8/Cebpb/Foxc1/Igf1r/Ercc1/Anxa1/Pdgfb/Serpine2/Adm/Hes1/Ada/Hif1a/Gja1/Icam1/Junb/Gjb3/Socs3/Lif/Adamts1/Ccn1/Snai1/Sycp2/Cyp7b1/Serpine1/Cd44/Fosl1/Plaur/Nfe2/Ereg/Ptgs2/Inhba/Ptx3	65
GO:0043114	regulation of vascular permeability	14/1595	33/23174	1.19356e-08	8.26274e-07	5.85289e-07	Angpt1/Pde3a/Pde2a/Nr3c1/Arhgap35/Trpv4/Tgfb1/Adm/Akap12/Slit2/Ddah1/C2cd4b/Ccl4/Cxcr2	14
GO:0006869	lipid transport	52/1595	328/23174	1.44232e-08	9.5948e-07	6.79645e-07	Pla2g2d/Abca8a/Abca8b/Abca6/Osbpl6/Acsl1/Adipoq/Atp10b/Abca9/Nucb2/Cry2/Edn1/Pparg/Slco2b1/Cd36/Tnfrsf11a/Vldlr/Ptch1/Slc27a1/Stoml1/Pnpla8/Relch/Ncor1/P2rx7/Lrp6/Mif/Plekha3/Ldlrap1/Acsl5/Sigmar1/C1qtnf1/Abcc1/Lrp1/Atp8b1/Anxa1/Ttc39b/Abcc4/Nfkbia/Ldlr/Soat1/Lipg/Slc10a6/Mfsd2a/Atp8b4/Anxa2/Thbs1/Atp8b5/Msr1/Cyp4f18/Soat2/Il1b/Inhba	52
GO:0072521	purine-containing compound metabolic process	68/1595	484/23174	1.53088e-08	1.00788e-06	7.1393e-07	Slc16a9/Cacnb4/Aox3/Acsl1/Slc2a9/Hmgcs2/Abcg2/Zbtb20/Prkaa2/Ces1d/Ehhadh/Prxl2c/Atp1a2/Gucy1a1/Aox1/Aldoc/Nudt7/Far1/Pde2a/Mpc2/Adcy6/Pfkfb2/Ncor1/Acadsb/Pank3/P2rx7/Samhd1/Gpam/Coasy/Foxk1/Mfn1/Opa1/Mif/Uqcrq/Map2k1/Hint1/Pde12/Acsl5/Pgam1/Acot8/Trp53/Hmgcr/Adpgk/Ampd2/Eif6/Nos3/Ak2/Ppif/Aprt/Ran/Eno2/Ddit4/Tgfb1/Entpd1/Nme1/Ier3/Slc25a25/Ada/Hif1a/Ak1/Myc/Pid1/Nt5e/Epha2/Adssl1/Hk3/Adora2b/Bdnf	68
GO:0010769	regulation of cell morphogenesis involved in differentiation	53/1595	338/23174	1.53875e-08	1.00788e-06	7.1393e-07	Tnr/Robo2/Enpp2/Srcin1/Bcl11a/Sema6c/Cdkl5/Ppp1r9a/Kif13b/Lrp4/Lims2/Tnik/Arhgap35/Spg20/Ptprf/Ulk2/Pten/Mfn1/Opa1/Zswim8/Ilk/Sema4d/Arpc2/Map2k1/Rac1/Bcar1/Sema4c/Srf/Ifrd1/Limk1/Zswim4/Cfl1/Sema3f/Picalm/Lrp1/Map1b/Sema6b/Olfm1/Coro1c/S100a10/Slit2/Sgk1/Sema7a/Ccr5/Tacstd2/Id1/Nrg1/Pdpn/Bdnf/Cass4/Has2/Ngf/Olfm4	53
GO:0048871	multicellular organismal homeostasis	68/1595	485/23174	1.6637e-08	1.08141e-06	7.66012e-07	Col9a1/Aqp7/C1qtnf9/Acsl1/Sftpd/Plcl1/Adipoq/Lgr4/Nr1d2/Cidea/Per2/Prkaa2/Cd36/Tnfrsf11a/Slc27a1/Appl2/Adcy6/Adgrf5/Akt3/P2rx7/Wwtr1/Lrp6/Dync1h1/Chmp4b/Cdh1/Rac1/Pgam5/Homer1/Atf4/Srf/Sox9/Adam17/Ampd2/Nos3/Nod2/Trpv4/Cebpb/Adamts5/Foxc1/Igf1r/Gadd45g/Cmklr1/Ccn2/Metrnl/Ubash3b/Gja1/Cldn4/Fabp5/Trpm2/Plac8/Ccr5/Sfn/Id1/Nphp4/Dio2/Gcnt2/Il4ra/Csf1/Tnfrsf11b/Tnf/Slc11a1/Cxcr4/Adam8/Il6/Nr4a3/Ptgs2…	68
GO:0045088	regulation of innate immune response	47/1595	285/23174	2.03677e-08	1.30399e-06	9.23678e-07	Tlr11/Mill2/Lgr4/Tril/Pparg/Cd36/Trim6/Appl2/Samhd1/Tlr3/Pja2/Cactin/Rps6ka3/Dhx58/Tmem173/Arrb2/Myd88/Nod2/Tnip1/Trim30a/Pvr/Nfkbia/Ikbke/Mndal/Vav1/Dusp10/Tnfaip3/Trim15/Hpx/Tlr13/Tnf/Tnip3/Fgr/Reg3g/Treml4/B430306N03Rik/A530064D06Rik/Ccr1/Il18rap/Adam8/Fpr2/Ereg/Cd300lf/Clec4e/9830107B12Rik/Acod1/Trem3	47
GO:0006913	nucleocytoplasmic transport	47/1595	287/23174	2.54538e-08	1.52633e-06	1.08117e-06	Cited1/Prkcq/Nxf7/Chp2/Cry2/Inpp4b/Angpt1/Cd36/Pkia/Appl2/Ptpn14/Atxn1/Phip/Ddx5/Ddx39b/Phb2/Trim28/Bag3/Cdh1/Nutf2/Nol6/Pom121/Lmna/Nxt1/Kpna2/Trp53/Rangap1/Ltv1/Cfl1/Sdad1/Eif5a/Eif6/Polr2d/Zfp593/Nup93/Rrs1/Ran/Ddx39/Tgfb1/Rasl2-9/Ier3/Nfkbia/Zc3h12a/Fermt1/Sfn/Egr2/Ptgs2	47
GO:0051169	nuclear transport	47/1595	287/23174	2.54538e-08	1.52633e-06	1.08117e-06	Cited1/Prkcq/Nxf7/Chp2/Cry2/Inpp4b/Angpt1/Cd36/Pkia/Appl2/Ptpn14/Atxn1/Phip/Ddx5/Ddx39b/Phb2/Trim28/Bag3/Cdh1/Nutf2/Nol6/Pom121/Lmna/Nxt1/Kpna2/Trp53/Rangap1/Ltv1/Cfl1/Sdad1/Eif5a/Eif6/Polr2d/Zfp593/Nup93/Rrs1/Ran/Ddx39/Tgfb1/Rasl2-9/Ier3/Nfkbia/Zc3h12a/Fermt1/Sfn/Egr2/Ptgs2	47
GO:0002444	myeloid leukocyte mediated immunity	24/1595	97/23174	2.79946e-08	1.65537e-06	1.17258e-06	Kit/Ywhaz/Pi4k2a/Ddx21/Ptafr/Fcgr3/Lat2/Hmox1/Fcgr1/Fcer1g/Cd84/Itgb2/Cd177/Il4ra/Cd300lb/Adora2b/Itgam/Stx11/Cxcl1/Fgr/Nr4a3/Cxcl5/Trem1/Trem3	24
GO:0048511	rhythmic process	47/1595	289/23174	3.1724e-08	1.86296e-06	1.31962e-06	Dbp/Per3/Enpp2/Tef/Prox1/Lgr4/Nr1d2/Arntl2/Cry2/Per2/Prkaa2/Rorc/Pparg/Tnfrsf11a/Ncor1/Pten/Ddx5/Mat2a/Prmt5/Trp53/Atf4/Atf5/Nos3/Arrb2/Id3/Mybbp1a/Igf1r/Nfkb2/Cavin3/Anxa1/Timeless/Ada/Relb/Piwil2/Gpr176/Id1/Egr2/Noct/Adamts1/Bdnf/Cyp7b1/Ngf/Il6/Ereg/Inhba/Ptx3/Prok2	47
GO:0030278	regulation of ossification	41/1595	235/23174	3.21403e-08	1.87448e-06	1.32779e-06	Cited1/Igfbp5/Dhrs3/Ptch1/Thrb/Sfrp1/Lrp4/Bcor/P2rx7/Nipbl/Ddx5/Lrp6/Ilk/Sema4d/Lmna/Creb3l1/Sox9/Acvr1/Id3/Bmp2k/Cebpd/Cebpb/Tgfb1/Ecm1/Isg15/Hif1a/Pdlim7/Gja1/Ccn4/Id1/Ifitm5/Egr2/Fbn2/Noct/Csf1/Ccn1/Tnf/Srgn/Ccr1/Nfe2/Il6	41
GO:0031589	cell-substrate adhesion	52/1595	337/23174	3.61252e-08	2.03713e-06	1.44299e-06	Enpp2/Srcin1/Ecm2/Limch1/Angpt1/Itgb8/Cd36/Pik3cb/Sfrp1/Lims2/Pten/Utrn/Ilk/Arpc2/Rac1/Bcar1/Adam15/Srf/Dlc1/Cfl1/Sdc4/Hacd1/Sned1/Lrp1/Ninj1/Actn1/Parvb/Ccn2/Coro1c/Lgals1/S100a10/Adamts9/Col5a3/Fermt1/Emilin1/Itga5/Tacstd2/Itgb2/Thbs1/Gcnt2/Itga2/Bst1/Csf1/Ccn1/Pdpn/Emilin2/Cass4/Fam107a/Serpine1/Has2/Adam8/Olfm4	52
GO:0002263	cell activation involved in immune response	45/1595	272/23174	3.6699e-08	2.05587e-06	1.45627e-06	Ccr6/Kit/Rorc/Shld2/Ywhaz/Pi4k2a/Trp53/Shb/Dysf/Tgfb1/Ptafr/Lrp1/Gadd45g/Ercc1/Anxa1/Lat2/Bcl3/Hmox1/Ada/Relb/Lgals1/Myb/Zc3h12a/Icam1/Fcer1g/Cd84/Itgb2/Nfkbid/Fgl2/Cd244a/Tnfaip3/Cd177/Lgals3/Il4ra/Adora2b/Slc11a1/Itgam/Stx11/Fgr/Il23a/Nlrp3/Il6/Nr4a3/Clec4d/Clec4e	45
GO:0019439	aromatic compound catabolic process	66/1595	476/23174	4.15761e-08	2.29883e-06	1.62837e-06	Aox3/Tet1/Ephx2/Zbtb20/Cidea/Prkaa2/Prxl2c/Aox1/Aldoc/Rnasel/Nudt7/Ephx1/Pde2a/Pfkfb2/Nudt12/Ncor1/P2rx7/Samhd1/Tnrc6c/Foxk1/Tnrc6b/Ddx5/Pnrc2/Ybx1/Mif/Eif4a3/Hint1/Entpd7/Pde12/Pgam1/Apex1/Trp53/Exosc2/Tbrg4/Adpgk/Zfp36l1/Eif6/Polr2d/Naf1/Mrto4/Myd88/Blvra/Oas2/Pop1/Eno2/Ddit4/Entpd1/Ier3/Hmox1/Ada/Hif1a/Zc3h12a/Ncf2/Ugt1a7c/Myc/Upp1/Zfp36/Nt5e/Hal/Tnfrsf1b/Dio2/Noct/Hk3/Slc11a1/Il6/Hdc	66
GO:0050866	negative regulation of cell activation	37/1595	203/23174	4.62881e-08	2.52656e-06	1.78968e-06	Pla2g2d/Skint2/Sftpd/Pparg/Sfrp1/Adgrf5/Vtcn1/Cbfb/Cblb/Sdc4/C1qtnf1/Cebpb/Tgfb1/Nrarp/Anxa1/Pdgfb/Serpine2/Fcgr2b/Ubash3b/Hmox1/Ldlr/Pdgfa/Zc3h12a/Emilin1/Arg2/Cd84/Nfkbid/Fgl2/Foxj1/Tnfaip3/Lgals3/Il4ra/Slfn1/Cd44/Cd80/Cd300lf/Tarm1	37
GO:0042063	gliogenesis	50/1595	321/23174	4.8494e-08	2.59702e-06	1.83959e-06	Enpp2/Sox6/Plp1/Dbi/Pparg/Nfib/Syne2/Hdac11/Atxn1/Nfix/Pten/Mpp5/Lrp6/Ilk/Mboat7/Map2k1/Prmt5/Sox9/Atf5/Tgfb1/Lrp1/Anxa1/Pdgfb/Serpine2/Hes1/Etv5/Ldlr/Nrros/Dusp10/Myc/Ncmap/Egr2/Tnfrsf1b/Lif/Nrg1/B4galt5/Csf1/Tnf/C5ar1/Itgam/Cxcr4/Vcan/Ccl12/Ccl2/Ccl3/Il6/Fpr2/Il1b/S100a8/S100a9	50
GO:0035690	cellular response to drug	56/1595	379/23174	5.06304e-08	2.66122e-06	1.88507e-06	Smpd3/Kcnc2/Chrm1/Kcnq1/Adipoq/Prkaa2/Itpr2/Ncoa1/Pde2a/Sfrp1/Adcy6/Nr3c1/Atrx/Pten/Rap1b/Arpc2/Gnai2/Cdh1/Bcar1/Adam15/Apex1/Sigmar1/Trp53/Atf4/Sox9/Cfl1/Eif4e/Ppif/Actb/Nod2/Tmem38b/Ddit4/Tgfb1/Anxa1/Pdgfb/Timeless/Ripk3/Hmox1/Pde4b/Zc3h12a/Slit2/Myc/Trpm2/Thbs1/Cyp1b1/Tnfaip3/Sphk1/Hk3/Tnf/Ankrd1/Serpine1/Il6/Ccl4/Nr4a3/Il1b/Acod1	56
GO:0046434	organophosphate catabolic process	37/1595	205/23174	6.02827e-08	3.11095e-06	2.20364e-06	Smpd3/Enpp2/Zbtb20/Inpp4b/Prkaa2/Prxl2c/Aldoc/Nudt7/Pde2a/Pnpla8/Pfkfb2/Nudt12/Plcg1/Ncor1/P2rx7/Samhd1/Pten/Foxk1/Mif/Hint1/Entpd7/Pgam1/Trp53/Adpgk/Eif6/Eno2/Ddit4/Entpd1/Ier3/Ada/Hif1a/Ldlr/Ncf2/Myc/Upp1/Nt5e/Hk3	37
GO:0046700	heterocycle catabolic process	64/1595	462/23174	6.8856e-08	3.44888e-06	2.443e-06	Aox3/Tet1/Zbtb20/Cidea/Prkaa2/Prxl2c/Aox1/Aldoc/Rnasel/Nudt7/Pde2a/Aldh6a1/Pfkfb2/Nudt12/Ncor1/P2rx7/Samhd1/Tnrc6c/Foxk1/Tnrc6b/Ddx5/Pnrc2/Ybx1/Mif/Eif4a3/Hint1/Entpd7/Pde12/Pgam1/Apex1/Trp53/Exosc2/Tbrg4/Adpgk/Zfp36l1/Eif6/Polr2d/Naf1/Mrto4/Myd88/Blvra/Oas2/Pop1/Eno2/Ddit4/Entpd1/Ier3/Hmox1/Ada/Hif1a/Zc3h12a/Ncf2/Ugt1a7c/Myc/Upp1/Zfp36/Nt5e/Hal/Tnfrsf1b/Noct/Hk3/Slc11a1/Il6/Hdc	64
GO:0043062	extracellular structure organization	49/1595	317/23174	8.3988e-08	4.1101e-06	2.91138e-06	Tnr/Smpd3/Col9a1/Mmp11/Ecm2/Lpl/Ces1d/Cd36/Creb3l1/Sox9/Sdc4/Tmem38b/Sh3pxd2b/Tgfb1/Foxc1/Col4a2/Nfkb2/Col18a1/Col4a1/Sdc1/Bcl3/Ccn2/Pla2g7/Soat1/Adamts14/Adamts9/Lipg/Col5a3/Col12a1/Fermt1/Mmp3/Emilin1/Anxa2/Tnfrsf1b/Cyp1b1/Mmp19/Lgals3/Loxl4/Mmp9/Ccn1/Pdpn/Tnfrsf11b/Tnf/Tgfbi/Has2/Il6/Mmp8/Soat2/Ptx3	49
GO:0031348	negative regulation of defense response	38/1595	217/23174	9.15915e-08	4.43126e-06	3.13887e-06	Mill2/Adipoq/Nr1d2/Pparg/Appl2/Samhd1/Cactin/Dhx58/Selenos/Arrb2/Nod2/Fcgr2b/Metrnl/Ier3/Ada/Ldlr/Siglece/Zc3h12a/Slit2/Dusp10/Fndc4/Zfp36/Arg2/Cd200r1/Nt5e/Fgl2/Tnfrsf1b/Tnfaip3/Socs3/Tnfaip6/Cd44/Ccr1/Nlrp3/Fpr2/Mefv/Il1r2/Nlrp12/Acod1	38
GO:0044270	cellular nitrogen compound catabolic process	63/1595	456/23174	9.60599e-08	4.62119e-06	3.27341e-06	Aox3/Tet1/Zbtb20/Cidea/Prkaa2/Prxl2c/Aox1/Aldoc/Rnasel/Nudt7/Pde2a/Aldh6a1/Pfkfb2/Nudt12/Ncor1/P2rx7/Samhd1/Tnrc6c/Foxk1/Tnrc6b/Ddx5/Pnrc2/Ybx1/Mif/Eif4a3/Hint1/Entpd7/Pde12/Pgam1/Apex1/Trp53/Exosc2/Tbrg4/Adpgk/Zfp36l1/Eif6/Polr2d/Naf1/Mrto4/Myd88/Blvra/Oas2/Pop1/Eno2/Ddit4/Entpd1/Ier3/Hmox1/Ada/Hif1a/Zc3h12a/Ncf2/Myc/Upp1/Zfp36/Nt5e/Hal/Tnfrsf1b/Noct/Hk3/Slc11a1/Il6/Hdc	63
GO:0062013	positive regulation of small molecule metabolic process	30/1595	151/23174	1.20098e-07	5.58818e-06	3.95837e-06	Adipoq/Zbtb20/Nucb2/Prkaa2/Prxl2c/Pparg/Dyrk2/Sec14l2/Epm2aip1/P2rx7/Mif/Map2k1/Acsl5/Kat2a/Nos3/Rdh10/Ptafr/Anxa1/Pdgfb/Adcyap1r1/Hif1a/Myc/Pid1/Cd244a/Tnf/Adora2b/Has2/Nr4a3/Ptgs2/Il1b	30
GO:0051098	regulation of binding	57/1595	399/23174	1.25073e-07	5.75674e-06	4.07777e-06	Plcl1/Adipoq/Per2/Pparg/Angpt1/Ifit2/Cd36/Trim6/Nfib/Ttbk2/Ptprf/Tnks/Nipbl/Stub1/Mapre1/Trim28/Eif4a3/Gtf2f1/Dph3/Ldlrap1/Taf10/Mdfi/Adam15/Cblb/Tmem173/Dysf/Zfp593/Arrb2/Id3/Actb/Cald1/Ran/Tgfb1/Foxc1/Cdt1/Lrp1/Trib3/Plk2/Nme1/Pdgfb/Hes1/Ubash3b/Hmox1/S100a10/Myc/Anxa2/Id1/Lif/Itga2/Lgals3/Mmp9/Grem2/Bdnf/Plaur/Ngf/Csf3/Mmp8	57
GO:0006979	response to oxidative stress	57/1595	401/23174	1.48465e-07	6.61041e-06	4.68247e-06	Smpd3/Kcnc2/Mill2/Sesn3/Adipoq/Prkaa2/Ucp3/Dapk1/Cd36/Fut8/Atrn/Gab1/Prkra/Rrm2b/Egln1/Chd6/Psmb5/Map2k1/Bcar1/Apex1/Gsr/Sigmar1/Selenos/Trp53/Atf4/Mcl1/P4hb/Cfl1/Nos3/Ppif/Fzd1/Abcc1/Ercc1/Anxa1/Etv5/Sod2/Ripk3/Hmox1/Hif1a/Slc25a24/Zc3h12a/Nr4a2/Fos/Trpm2/Mmp3/Thbs1/Cyp1b1/Tnfaip3/Plk3/Sphk1/Mmp9/Hk3/Tnf/Slc7a11/Il6/Nr4a3/Ptgs2	57
GO:1905952	regulation of lipid localization	29/1595	145/23174	1.67038e-07	7.26571e-06	5.14665e-06	Adipoq/Lpl/Nucb2/Cry2/Cidea/Edn1/Pparg/Cd36/Tnfrsf11a/Ptch1/Ncor1/P2rx7/Mif/Ldlrap1/Acsl5/C1qtnf1/Ehd1/Lrp1/Ttc39b/Nfkbia/Ikbke/Zc3h12a/Hilpda/Lipg/Anxa2/Thbs1/Msr1/Cyp4f18/Il1b	29
GO:2001057	reactive nitrogen species metabolic process	21/1595	84/23174	1.68145e-07	7.26781e-06	5.14813e-06	Smpd3/Cd36/Rac1/Selenos/Dynll1/Nos3/Tmem106a/Sod2/Gla/Klf2/Zc3h12a/Icam1/Ddah1/Itgb2/Cyp1b1/Tnf/Il6/Mmp8/Ptgs2/Il1b/Ptx3	21
GO:0034599	cellular response to oxidative stress	43/1595	268/23174	1.78117e-07	7.65991e-06	5.42588e-06	Smpd3/Kcnc2/Prkaa2/Dapk1/Cd36/Fut8/Prkra/Chd6/Bcar1/Apex1/Gsr/Sigmar1/Selenos/Trp53/Atf4/Mcl1/P4hb/Cfl1/Nos3/Ppif/Fzd1/Anxa1/Etv5/Sod2/Ripk3/Hmox1/Hif1a/Slc25a24/Zc3h12a/Nr4a2/Fos/Trpm2/Mmp3/Thbs1/Cyp1b1/Tnfaip3/Sphk1/Mmp9/Hk3/Tnf/Slc7a11/Il6/Nr4a3	43
GO:0001781	neutrophil apoptotic process	8/1595	12/23174	1.90793e-07	8.06882e-06	5.71553e-06	Pik3cb/Anxa1/Fcgr2b/Cd44/Hcar2/Slc7a11/Il6/Cxcr2	8
GO:0016032	viral process	44/1595	279/23174	2.12554e-07	8.88977e-06	6.29705e-06	Prox1/Zfp72/Rnasel/Trim6/Chmp4c/Ddx5/Chmp4b/Pcbp1/Trim28/Banf1/Ppib/Eif3b/Pde12/Kpna2/Trp53/Slc20a2/Rrp1b/Pfn1/P4hb/Cfl1/Trim8/Trim30a/Tgfb1/Ifitm3/Ripk3/Isg15/Ifitm2/Lgals1/Oasl1/Zc3h12a/Icam1/Myc/Zfp36/Ccr5/Anxa2/Trim15/Oas3/Mmp9/Tnf/Ifitm1/Ifitm6/Cxcr4/Ccl4/Ptx3	44
GO:0006644	phospholipid metabolic process	51/1595	346/23174	2.13665e-07	8.88977e-06	6.29705e-06	Pla2g2d/Smpd3/Pigz/Enpp2/Hmgcs2/Pik3ip1/Inpp4b/Dbi/Far1/Pik3cb/Cish/Slc27a1/Dgka/Pik3c2b/Plaat3/Adgrf5/Pnpla8/Pigg/Rubcn/Fdft1/Plcg1/Gpam/Pten/Pik3r4/Mboat7/Plpp5/Pi4k2a/Rac1/Acsl5/Samd8/Plpp1/Pgs1/Tmem150a/Flt1/Agpat5/Nod2/Tmem38b/Tgfb1/Pdgfb/Agpat4/Ldlr/Pdgfa/Pla2g7/Smpd5/Fabp5/Pik3r5/Socs3/Sgms2/Fgr/Plek/Fpr2	51
GO:0032963	collagen metabolic process	24/1595	109/23174	2.98995e-07	1.18416e-05	8.38796e-06	Smpd3/Mmp11/Il6ra/Pparg/P2rx7/Adam15/Creb3l1/Arrb2/Tgfb1/Pdgfb/Ccn2/Hif1a/Errfi1/Mmp3/Emilin1/Id1/Mmp19/Itga2/Mmp9/Adora2b/Serpine1/Ccl2/Il6/Mmp8	24
GO:0006109	regulation of carbohydrate metabolic process	33/1595	183/23174	3.13467e-07	1.22439e-05	8.67293e-06	Smpd3/Adipoq/Zbtb20/Igfbp5/Prkaa2/Rorc/Prxl2c/Nr3c1/Dyrk2/Pfkfb2/Ncor1/Epm2aip1/P2rx7/Foxk1/Mif/Pgam1/Midn/Trp53/Kat2a/Eif6/C1qtnf1/Ddit4/Tgfb1/Ptafr/Pdgfb/Adcyap1r1/Ier3/Hif1a/Myc/Cd244a/Has2/Plek/Il6	33
GO:0007346	regulation of mitotic cell cycle	65/1595	492/23174	3.17127e-07	1.2323e-05	8.729e-06	Smpd3/Prkcq/Cacnb4/Fgfr2/Edn1/Ptch1/Jade1/Klhl22/Pkia/Cdk5rap2/Cdkn1b/Chmp4c/Asah2/Atrx/Phip/Cul4b/Tnks/Tom1l1/Nipbl/Pten/Dync1h1/Chmp4b/Phb2/Psme3/Bub3/Pim3/Apex1/Cdk2ap2/Trp53/Shb/Ranbp1/Tgfa/Adam17/Eif4e/Zfp36l1/Rcc1/Cradd/Hacd1/Nle1/Nek6/Tgfb1/Foxc1/Cdt1/Igf1r/Cdc45/Cks2/Plk2/Anxa1/Pdgfb/Hes1/Ier3/Lgmn/Btg1/Myc/Lmnb1/Plk3/Sphk1/Adamts1/Pdpn/Tnf/Slfn1/Fam107a/Ccl12/Ereg/Il1b	65
GO:0050863	regulation of T cell activation	46/1595	304/23174	3.88083e-07	1.47524e-05	1.04498e-05	Pla2g2d/Prkcq/Skint2/Sftpd/Il6ra/Rorc/Mapk8ip1/Dock8/Vtcn1/Gpam/Ephb4/Cbfb/Shb/Cblb/Kat2a/Sdc4/Cebpb/Tgfb1/Nrarp/Anxa1/Hes1/Ripk3/Ada/Lgals1/Myb/Zc3h12a/Dusp10/Arg2/Nfkbid/Fgl2/Foxj1/Cd244a/Tnfrsf1b/Lgals3/Il4ra/Cd209e/Slfn1/Cd44/Il23a/Cd80/Adam8/Nlrp3/Ccl2/Il6/Il1b/Tarm1	46
GO:0048872	homeostasis of number of cells	47/1595	315/23174	4.41668e-07	1.62104e-05	1.14826e-05	Kit/Lgr4/Sox6/Pik3cb/Adgrf5/Ezh1/Ncor1/Akt3/P2rx7/Kif3a/Gpam/Mif/Rac1/Srf/Sox9/Adam17/Zfp36l1/Nos3/Lyar/Nle1/Tgfb1/Anxa1/Fcgr2b/Ripk3/Isg15/Hmox1/Ada/Hif1a/Sh2b2/Myb/Pde4b/Klf2/Pmaip1/Spi1/Gcnt4/Zfp36/Fcer1g/Tnfaip3/Csf1/Cd44/Hcar2/Ccl2/Slc7a11/Il6/Cxcr2/Inhba/Cxcl5	47
GO:0007409	axonogenesis	62/1595	466/23174	4.62627e-07	1.69067e-05	1.19758e-05	Tnr/Slitrk4/Robo2/Raph1/Lgr4/Fgfr2/Bcl11a/Sema6c/Cdkl5/Ablim1/Ptch1/Kif13b/Nfib/Arhgef28/Lrp4/Neo1/Arhgap35/Spg20/Ulk2/Dst/Kif3a/Pten/Zswim8/Ilk/Ephb4/Sema4d/Map2k1/Rac1/Sema4c/Srf/Vasp/Ifrd1/Limk1/Zswim4/Alcam/Sema3f/Actb/Picalm/Tsku/Igf1r/Lrp1/Map1b/Sema6b/Olfm1/Nr4a2/Slit2/Sema7a/Emb/Ccr5/Epha2/Artn/Egr2/Nrg1/B4galt5/Etv4/Bdnf/Chl1/Cxcr4/Nptx1/Celsr3/Ngf/Nr4a3	62
GO:0002718	regulation of cytokine production involved in immune response	20/1595	82/23174	5.06036e-07	1.83357e-05	1.29881e-05	Tril/Angpt1/Cd36/Gprc5b/Trim6/Tlr3/Mif/Ddx21/Nod2/Tgfb1/Hmox1/Sema7a/Il1r1/Fcer1g/Tnfrsf1b/Tnf/Nlrp3/Il6/Nr4a3/Il1b	20
GO:0072330	monocarboxylic acid biosynthetic process	41/1595	260/23174	5.46193e-07	1.93785e-05	1.37267e-05	Prox1/Cyp27a1/Zbtb20/Lpl/Per2/Prkaa2/Edn1/Fads1/Plp1/Prxl2c/Elovl7/Aldoc/Asah2/Pnpla8/Pfkfb2/Srr/Ncor1/P2rx7/Foxk1/Mif/Pgam1/Trp53/Adpgk/Eif6/Rdh10/Hacd1/Eno2/Ddit4/Trib3/Anxa1/Ier3/Hif1a/Lipg/Myc/Fabp5/Sphk1/Hk3/Cyp7b1/Dhrs9/Ptgs2/Il1b	41
GO:0032535	regulation of cellular component size	55/1595	397/23174	5.64954e-07	1.9635e-05	1.39084e-05	Tnr/C1qtnf9/Bcl11a/Edn1/Sema6c/Cdkl5/Fhod3/Ppp1r9a/Pex11a/Slc12a2/Arhgap35/Spg20/Akt3/Ulk2/P2rx7/Pten/Sptbn1/Arfgef1/Ilk/Clns1a/Sema4d/Arpc2/Rac1/Arpc1b/Capzb/E2f4/Sema4c/Srf/Vasp/Ifrd1/Limk1/Pfn1/Cfl1/Sema3f/Slc12a4/Inf2/Picalm/Eps8/Lrp1/Map1b/Sema6b/Ppp1r15a/Olfm1/Cdc42ep2/Icam1/Slit2/Ccl11/Gm14137/Sema7a/Ccr5/Nrg1/Bdnf/Plek/Ngf/Csf3	55
GO:0006809	nitric oxide biosynthetic process	19/1595	76/23174	6.44372e-07	2.1517e-05	1.52415e-05	Smpd3/Cd36/Rac1/Dynll1/Nos3/Sod2/Gla/Klf2/Zc3h12a/Icam1/Ddah1/Itgb2/Cyp1b1/Tnf/Il6/Mmp8/Ptgs2/Il1b/Ptx3	19
GO:0048638	regulation of developmental growth	55/1595	399/23174	6.63988e-07	2.20854e-05	1.56441e-05	Tnr/Gdf5/Kcnk2/Prox1/Fgfr2/Bcl11a/Edn1/Sema6c/Cdkl5/Ptch1/Atrn/Sfrp1/Cdkn1b/Ppp2r3a/Nr3c1/Spg20/Ncor1/Ulk2/Gpam/Nipbl/Pten/Ilk/Ddx39b/Sema4d/Ppib/Sema4c/Srf/Ifrd1/Limk1/Cfl1/Sema3f/Pim1/Sh3pxd2b/Picalm/Foxc1/Lrp1/Map1b/Sema6b/Olfm1/Lgmn/Gja1/Slit2/Ccn4/Dusp10/Sema7a/Dusp6/Plac8/Ccr5/Nrg1/Csf1/Bdnf/Gdf15/Serpine1/Cxcr4/Ngf	55
GO:1901615	organic hydroxy compound metabolic process	62/1595	471/23174	6.69671e-07	2.21877e-05	1.57166e-05	Cited1/Duoxa1/Kit/Plcl1/Ephx2/Hmgcs2/Prox1/Cyp27a1/Inpp4b/Dhrs3/Per2/Prkaa2/Ces1d/Sord/Plce1/Retsat/Slc5a3/Vldlr/Ephx1/Thrb/Vdr/Asah2/Sec14l2/Pfkfb2/Fdft1/Plcg1/Pten/Ldlrap1/Trp53/Hmgcr/Plpp1/Dysf/Msmo1/Rdh10/Hsd3b7/Ptafr/Lrp1/Atp8b1/Adcyap1r1/Ttc39b/Hif1a/Ldlr/Soat1/Pde1b/Nr4a2/Slco4a1/Gcnt4/Cd244a/Cyp1b1/Dio2/Sphk1/Tnf/Snai1/Cyp7b1/Rdh12/Plek/Cyp4f18/Slc7a11/Soat2/Ch25h/Il1b/Hdc	62
GO:1903829	positive regulation of cellular protein localization	44/1595	297/23174	1.23901e-06	3.68888e-05	2.61301e-05	Chrm1/Prkcq/Cacnb4/Chp2/Cnst/Prkaa2/Cd2ap/Cacnb3/Lrp4/Snx33/Tcaf1/Kif3a/Nipbl/Sptbn1/Trim28/Arpc2/Bag3/Cdh1/Nutf2/Nlgn2/Cct3/Cfl1/Trim8/Rhog/Glis2/Ran/Tgfb1/Cdt1/Lrp1/Gnl3/Msn/Zc3h12a/Pmaip1/Fcer1g/Sfn/Epha2/Nkd2/Lif/Plk3/Lgals3/Nrg1/Tnf/Ccl2/Ptgs2	44
GO:0009896	positive regulation of catabolic process	56/1595	418/23174	1.31885e-06	3.87241e-05	2.74301e-05	Adra2a/Sesn3/Zbtb20/Prkaa2/Amer1/Dapk1/Prxl2c/Crebrf/Ppp2r3a/Snx33/Cul4b/Fyco1/P2rx7/Tnrc6c/Pten/Vps13d/Tnrc6b/Stub1/Sgta/Mif/Map2k1/Bag3/Acsl5/Sox9/Cblb/Tmem173/Zfp36l1/Trim8/Nod2/Zfand2a/Trim30a/Lrp1/Trib3/Plk2/Trib1/Rnf19b/Ier3/Hmox1/Hif1a/Ldlr/Fbxl5/Gja1/Ecscr/Msn/Zc3h12a/Myc/Zfp36/Tnfrsf1b/Tnfaip3/Nkd2/Plk3/Tnf/Adam8/Il6/Mefv/Il1b	56
GO:0006606	protein import into nucleus	28/1595	151/23174	1.35139e-06	3.95432e-05	2.80103e-05	Prkcq/Chp2/Cry2/Angpt1/Cd36/Pkia/Appl2/Phip/Ddx5/Phb2/Trim28/Bag3/Cdh1/Nutf2/Pom121/Lmna/Nxt1/Kpna2/Trp53/Cfl1/Nup93/Ran/Tgfb1/Rasl2-9/Nfkbia/Zc3h12a/Fermt1/Ptgs2	28
GO:0097237	cellular response to toxic substance	30/1595	169/23174	1.49363e-06	4.31126e-05	3.05387e-05	Smpd3/Kcnc2/Abcg2/Itpr2/Cd36/Ppp1r9a/Pten/Apex1/Sigmar1/Trp53/Cfl1/Nos3/Ppif/Actb/Anxa1/Pdgfb/Timeless/Sod2/Ripk3/Hmox1/Zc3h12a/Trpm2/Cyp1b1/Tnfaip3/Sphk1/Hk3/Tnf/Rdh12/Il6/Nr4a3	30
GO:0032943	mononuclear cell proliferation	45/1595	309/23174	1.51871e-06	4.36886e-05	3.09467e-05	Pla2g2d/Prkcq/Sftpd/Il6ra/Mapk8ip1/Satb1/Dock8/Vtcn1/P2rx7/Gpam/Mif/Trp53/Shb/Cblb/Myd88/Sdc4/Cebpb/Tgfb1/Anxa1/Fcgr2b/Hes1/Ripk3/Ada/Ctps/Gja1/Msn/Arg2/Itgb2/Foxj1/Cd244a/Tnfrsf1b/Lgals3/Bst1/Csf1/Cd209e/Slfn1/Slc11a1/Itgam/Cxcr4/Cd44/Il23a/Cd80/Il6/Il1b/Tarm1	45
GO:0002573	myeloid leukocyte differentiation	35/1595	216/23174	1.90762e-06	5.36086e-05	3.79735e-05	Kit/Adipoq/Inpp4b/Pparg/Tnfrsf11a/Sfrp1/Ltbr/Zfp36l1/Cebpb/Tgfb1/Nme1/Trib1/Fstl3/Ubash3b/Relb/Nrros/Pf4/Ccn4/Myc/Junb/Fos/Spi1/Fcer1g/Anxa2/Epha2/Lif/Csf1/Tnf/Itgam/Ccr1/Il23a/Adam8/Csf3/Ccl3/Cd300lf	35
GO:0000082	G1/S transition of mitotic cell cycle	30/1595	171/23174	1.9234e-06	5.36975e-05	3.80365e-05	Cacnb4/Cables1/Jade1/Cdkn1b/Klf11/Cul4b/Pten/Taf10/Psme3/Apex1/Cdk2ap2/Trp53/E2f4/Adam17/Eif4e/Acvr1/Rcc1/Cradd/Hacd1/Cdc45/Plk2/Anxa1/Myb/Plk3/Adamts1/Pdpn/Slfn1/Fam107a/Ccl12/Inhba	30
GO:0034341	response to interferon-gamma	26/1595	137/23174	2.02804e-06	5.625e-05	3.98446e-05	Cited1/Dapk1/Pparg/Gbp3/Rab11fip5/Pde12/Trp53/Actg1/Ifitm3/Ifitm2/Cdc42ep2/Rab20/Ccl11/Ccl9/Ccl6/Hpx/Ifitm1/Slc11a1/Stx11/Ifitm6/Ccl12/Ccl2/Ccl3/Ccl4/Mefv/Acod1	26
GO:1990845	adaptive thermogenesis	28/1595	155/23174	2.3138e-06	6.25461e-05	4.43044e-05	Acsl1/Plcl1/Adipoq/Lgr4/Cidea/Per2/Ucp3/Pparg/Cd36/Appl2/Dync1h1/Pgam5/Atf4/Adam17/Trpv4/Cebpb/Adamts5/Igf1r/Gadd45g/Cmklr1/Gja1/Gpr39/Fabp5/Plac8/Id1/Dio2/Il4ra/Cxcr4	28
GO:0006110	regulation of glycolytic process	13/1595	42/23174	2.86164e-06	7.45165e-05	5.27836e-05	Zbtb20/Prkaa2/Prxl2c/Ncor1/P2rx7/Mif/Pgam1/Trp53/Eif6/Ddit4/Ier3/Hif1a/Myc	13
GO:0090257	regulation of muscle system process	37/1595	239/23174	2.99468e-06	7.77429e-05	5.5069e-05	Adra2a/Kit/Kcnq1/Igfbp5/Ehd3/Edn1/Cmya5/Atp1a2/Gucy1a1/Nr3c1/Arhgap42/Ddx39b/Map2k1/Lmna/Srf/Nos3/Ece1/Cald1/Tmem38b/Ptafr/Ccn2/Ada/Stc1/Pde4b/Zc3h12a/Ccn4/Errfi1/Tnni2/Arg2/Scn5a/Tnfrsf1b/Itga2/Sphk1/Adora2b/Nr4a3/Ptgs2/Prok2	37
GO:0071407	cellular response to organic cyclic compound	61/1595	482/23174	3.03556e-06	7.83515e-05	5.55001e-05	Kcnq1/Adipoq/Igfbp5/Cry2/Itpr2/Rorc/Atp1a2/Pparg/Pde3a/Itpr1/Ptch1/Pde2a/Sfrp1/Crebrf/Vdr/Cdkn1b/Adcy6/Nr3c1/Ncor1/P2rx7/Tlr3/Ddx5/Trip4/Lrp6/Phb2/Rap1b/Arpc2/Cdh1/Pde12/Atf4/Ranbp1/Tmem173/Eif4e/Zfp36l1/Arrb2/Pim1/Id3/Actb/Tmem38b/Ddit4/Tgfb1/Anxa1/Pdgfb/Nfkbia/Pde4b/Msn/Padi2/Zc3h12a/Sgk1/Trpm2/Zfp36/Cyp1b1/Tnf/Bdnf/Fam107a/Cyp7b1/Ccl12/Nr4a3/Il1b/Inhba/Acod1	61
GO:0060560	developmental growth involved in morphogenesis	40/1595	268/23174	3.079e-06	7.92074e-05	5.61064e-05	Tnr/Raph1/Fgfr2/Bcl11a/Sema6c/Cdkl5/Sfrp1/Slc12a2/Ppp2r3a/Spg20/Ulk2/Lrp6/Ilk/Trim28/Llph/Sema4d/Sema4c/Srf/Ifrd1/Limk1/Sox9/Cfl1/Sema3f/Spry2/Rdh10/Picalm/Tgfb1/Lrp1/Map1b/Sema6b/Olfm1/Slit2/Ccl11/Sema7a/Ccr5/Nrg1/Csf1/Bdnf/Cxcr4/Ngf	40
GO:0051783	regulation of nuclear division	32/1595	194/23174	3.51361e-06	8.93086e-05	6.32616e-05	Smpd3/Fgfr2/Edn1/Pde3a/Klhl22/Cdk5rap2/Cdkn1b/Chmp4c/Atrx/Phip/Tnks/Tom1l1/Nipbl/Chmp4b/Phb2/Bub3/Ranbp1/Tgfa/Rcc1/Nek6/Tgfb1/Cdt1/Igf1r/Pdgfb/Rps6ka2/Piwil2/Lif/Sphk1/Tnf/Ereg/Il1b/Osm	32
GO:0090288	negative regulation of cellular response to growth factor stimulus	26/1595	142/23174	4.05687e-06	9.95512e-05	7.05168e-05	Chrdl2/Chrdl1/Cidea/Sfrp1/Epn2/Spg20/Ptprf/Glg1/Stub1/Creb3l1/Trp53/Adam17/Fzd1/Spry2/Vasn/Fstl3/Pmepa1/Nrros/Spry4/Slit2/Adgra2/Emilin1/Fam72a/Thbs1/Fbn2/Grem2	26
GO:0031331	positive regulation of cellular catabolic process	48/1595	351/23174	4.17682e-06	0.000101907	7.21858e-05	Adra2a/Sesn3/Zbtb20/Prkaa2/Amer1/Dapk1/Prxl2c/Snx33/Fyco1/P2rx7/Tnrc6c/Pten/Vps13d/Tnrc6b/Stub1/Sgta/Mif/Map2k1/Bag3/Acsl5/Tmem173/Zfp36l1/Trim8/Nod2/Zfand2a/Lrp1/Trib3/Plk2/Trib1/Rnf19b/Hmox1/Hif1a/Ldlr/Fbxl5/Ecscr/Msn/Zc3h12a/Myc/Zfp36/Tnfrsf1b/Tnfaip3/Nkd2/Plk3/Tnf/Adam8/Il6/Mefv/Il1b	48
GO:0071216	cellular response to biotic stimulus	44/1595	311/23174	4.27995e-06	0.000103909	7.3604e-05	Cmpk2/Plscr4/Cd36/Pde2a/Mif/Cactin/Slx4/Nfkbib/Selenos/Trp53/Nos3/Myd88/Nod2/Cebpb/Tgfb1/Trib1/Fcgr2b/Nfkbia/Cd68/Pde4b/Zc3h12a/Pf4/Zfp36/Cd84/Tnfrsf1b/Tnfaip3/Cd300lb/Tnf/Ankrd1/Tnip3/Serpine1/Cxcl1/Cd80/Ccl12/Ppbp/Nlrp3/Ccl2/Il6/Il1b/Il1rn/Cxcl3/Cxcl2/Cxcl5/Acod1	44
GO:0008544	epidermis development	45/1595	323/23174	5.04979e-06	0.000119774	8.48418e-05	Lgr4/Igfbp5/Fgfr2/Exph5/Dbi/Ppl/Trps1/Ptch1/Satb1/Prss8/Vdr/Lrp4/Gab1/Ift172/Irf6/Kif3a/Atp2c1/Mafg/Map2k1/Rac1/Tfdp1/Sox9/Zfp36l1/Clic4/Foxc1/Igf1r/Fosl2/Anxa1/Hes1/Pdgfa/Fermt1/Maff/Errfi1/Krt17/Zfp36/Sfn/Epha2/Tnfrsf19/Tnf/Madcam1/Snai1/Cers3/Reg3g/Ptgs2/Inhba	45
GO:0001558	regulation of cell growth	55/1595	429/23174	6.24282e-06	0.000144844	0.0001026	Tnr/Igfbp5/Bcl11a/Edn1/Sema6c/Cdkl5/Pparg/Smarca2/Klhl22/Sfrp1/Cdkn1b/Nr3c1/Spg20/Ulk2/Ilk/Ddx39b/Sema4d/Adam15/Trp53/Exosc2/Sema4c/Srf/Ifrd1/Limk1/Adam17/Cfl1/Sema3f/Hsd3b7/Picalm/Ppan/Tgfb1/Lrp1/Map1b/Sertad1/Serpine2/Sema6b/Olfm1/Mndal/Gja1/Slit2/Ccn4/Sgk1/Sema7a/Krt17/Ccr5/Sfn/Sphk1/Nrg1/Bdnf/Fam107a/Cxcr4/Cd44/Hbegf/Ngf/Inhba	55
GO:0071402	cellular response to lipoprotein particle stimulus	10/1595	27/23174	6.61101e-06	0.000152555	0.000108062	Smpd3/Lpl/Pparg/Cd36/Adam17/Myd88/Ldlr/Cd68/Fcer1g/Itgb2	10
GO:0042136	neurotransmitter biosynthetic process	21/1595	104/23174	6.95832e-06	0.000158847	0.000112519	Smpd3/Cd36/Rac1/Tha1/Dynll1/Nos3/Sod2/Gla/Klf2/Zc3h12a/Icam1/Ddah1/Itgb2/Cyp1b1/Tnf/Il6/Mmp8/Ptgs2/Il1b/Hdc/Ptx3	21
GO:0002532	production of molecular mediator involved in inflammatory response	17/1595	74/23174	8.52931e-06	0.000184333	0.000130572	Ephx2/Appl2/Ywhaz/Adam17/Myd88/Nod2/Il17ra/Zc3h12a/Alox5/Dusp10/Fcer1g/Alox5ap/Il4ra/Serpine1/Mefv/Il1r2/Tarm1	17
GO:0042107	cytokine metabolic process	23/1595	122/23174	8.67781e-06	0.000186595	0.000132174	Prkcq/Tia1/Tlr3/Mast2/Myd88/Cebpb/Ptafr/Gadd45g/Fcgr3/Bcl3/Akap12/Errfi1/Zfp36/Foxj1/Thbs1/Prg4/Tnf/Il6/Ereg/Il1b/Nlrp12/Trem1/Trem3	23
GO:0006066	alcohol metabolic process	43/1595	310/23174	9.06974e-06	0.000194042	0.000137449	Plcl1/Ephx2/Hmgcs2/Cyp27a1/Inpp4b/Dhrs3/Prkaa2/Ces1d/Sord/Plce1/Retsat/Slc5a3/Vldlr/Ephx1/Thrb/Vdr/Asah2/Sec14l2/Fdft1/Plcg1/Pten/Ldlrap1/Hmgcr/Plpp1/Dysf/Rdh10/Hsd3b7/Ptafr/Lrp1/Adcyap1r1/Ttc39b/Ldlr/Soat1/Cd244a/Cyp1b1/Sphk1/Tnf/Cyp7b1/Rdh12/Plek/Soat2/Ch25h/Il1b	43
GO:0006090	pyruvate metabolic process	22/1595	114/23174	9.15459e-06	0.000194392	0.000137697	Zbtb20/Prkaa2/Prxl2c/Aldoc/Mpc2/Pfkfb2/Srr/Ncor1/P2rx7/Foxk1/Mif/Pgam1/Trp53/Adpgk/Eif6/Eno2/Ddit4/Ier3/Hif1a/Myc/Hk3/Nr4a3	22
GO:0060759	regulation of response to cytokine stimulus	22/1595	114/23174	9.15459e-06	0.000194392	0.000137697	Adipoq/Pparg/Angpt1/Trim6/Crebrf/Ptprf/Samhd1/Cactin/Adam17/Ecm1/Casp4/Ikbke/Padi2/Slit2/Il1r1/Sphk1/Hpx/Csf1/Il6/Il1r2/Il1rn/Cd300lf	22
GO:0045446	endothelial cell differentiation	21/1595	106/23174	9.50065e-06	0.000199748	0.000141491	Prox1/Cldn5/Pde2a/Foxj2/Rap1b/Acvr1/Myd88/Clic4/Col18a1/Stc1/Msn/Btg1/Icam1/Anxa2/Id1/Apold1/Pdpn/Tnf/Cxcr4/Il1b/Prok2	21
GO:0034504	protein localization to nucleus	39/1595	271/23174	9.81575e-06	0.000203856	0.000144401	Prkcq/Cacnb4/Chp2/Cry2/Angpt1/Cd36/Pkia/Cd2ap/Syne2/Appl2/Phip/Taf8/Ddx5/Phb2/Trim28/Bag3/Cdh1/Nutf2/Pom121/Lmna/Nxt1/Kpna2/Trp53/Rangap1/Sox9/Cfl1/Trim8/Nup93/Rpf2/Rrs1/Glis2/Ran/Tgfb1/Rasl2-9/Nfkbia/Zc3h12a/Fermt1/Lif/Ptgs2	39
GO:0071560	cellular response to transforming growth factor beta stimulus	32/1595	204/23174	1.0322e-05	0.000213329	0.000151111	Cited1/Cidea/Sox6/Cldn5/Fut8/Appl2/Nr3c1/Yes1/Glg1/Stub1/Trp53/Sox9/Adam17/Zfp36l1/Nos3/Acvr1/Arrb2/Vasn/Tgfb1/Igf1r/Col4a2/Pmepa1/Nrros/Fos/Fermt1/Emilin1/Thbs1/Fbn2/Gcnt2/Ankrd1/Serpine1/Ccl2	32
GO:0061448	connective tissue development	40/1595	282/23174	1.07793e-05	0.000222241	0.000157424	Smpd3/Col9a1/Chrdl2/Gdf5/Il6ra/Bmp3/Barx2/Edn1/Sox6/Rorc/Amer1/Itgb8/Trps1/Thrb/Nfib/Plaat3/Spg20/Glg1/Lrp6/Lmna/Srf/Sox9/Trpv4/Sh3pxd2b/Tgfb1/Ecm1/Pdgfb/Ccn2/Slc25a25/Hif1a/Stc1/Ccn4/Col12a1/Prrx2/Anxa2/Thbs1/Csf1/Ccn1/Snai1/Gdf6	40
GO:0019915	lipid storage	16/1595	68/23174	1.12721e-05	0.000230725	0.000163434	Lpl/Cry2/Cidea/Pparg/Cd36/Dysf/Ehd1/Ttc39b/Nfkbia/Ikbke/Soat1/Zc3h12a/Hilpda/Tnf/Msr1/Il1b	16
GO:0051817	modification of morphology or physiology of other organism involved in symbiotic interaction	19/1595	91/23174	1.13489e-05	0.000231741	0.000164153	Sftpd/Zfp72/Ppib/Rrp1b/Cfl1/Tnip1/Tgfb1/Zc3h12a/Pf4/Myc/Ccr5/Anxa2/Mmp9/Cxcl1/Ccl4/Ptx3/Cxcl5/Trem1/Trem3	19
GO:0002819	regulation of adaptive immune response	32/1595	205/23174	1.14378e-05	0.00023244	0.000164649	Prkcq/Il6ra/Cd55/Shld2/P2rx7/Mif/Nod2/Tgfb1/Pvr/Anxa1/Fcgr3/Fcgr2b/Ripk3/Ada/Zc3h12a/Dusp10/Il1r1/Fcgr1/Fcer1g/Nfkbid/Foxj1/Tnfrsf1b/Tnfaip3/Il4ra/Hpx/Tnf/Slc11a1/Cd44/Il23a/Nlrp3/Il6/Il1b	32
GO:0030168	platelet activation	17/1595	76/23174	1.2459e-05	0.00024787	0.000175578	Prkcq/F8/Pik3cb/Srf/C1qtnf1/Rap2b/Entpd1/Pdgfb/Serpine2/Ubash3b/Pdgfa/Pf4/Fcer1g/Pdpn/Selp/Plek/Slc7a11	17
GO:0043299	leukocyte degranulation	16/1595	69/23174	1.37453e-05	0.000267218	0.000189283	Kit/Ywhaz/Pi4k2a/Ptafr/Lat2/Hmox1/Fcer1g/Cd84/Itgb2/Cd177/Il4ra/Adora2b/Itgam/Stx11/Fgr/Nr4a3	16
GO:0030193	regulation of blood coagulation	17/1595	77/23174	1.49735e-05	0.000286515	0.000202952	Prkcq/Tspan8/Cd36/C1qtnf1/Pdgfb/Serpine2/Ubash3b/Pdgfa/Tpsab1/Fcer1g/Anxa2/Thbs1/Pdpn/Selp/Serpine1/Plek/S100a9	17
GO:0071559	response to transforming growth factor beta	32/1595	208/23174	1.548e-05	0.000293569	0.000207949	Cited1/Cidea/Sox6/Cldn5/Fut8/Appl2/Nr3c1/Yes1/Glg1/Stub1/Trp53/Sox9/Adam17/Zfp36l1/Nos3/Acvr1/Arrb2/Vasn/Tgfb1/Igf1r/Col4a2/Pmepa1/Nrros/Fos/Fermt1/Emilin1/Thbs1/Fbn2/Gcnt2/Ankrd1/Serpine1/Ccl2	32
GO:0007015	actin filament organization	51/1595	400/23174	1.55805e-05	0.000294818	0.000208834	Prkcq/Prox1/Pof1b/Limch1/Fhod3/Ppp1r9a/Cd2ap/Arhgap35/Shroom4/Arhgap12/Sptbn1/Arfgef1/Cap1/Arpc2/Rac1/Arpc1b/Capzb/Bcar1/Srf/Vasp/Limk1/Dlc1/Pfn1/Cfl1/Cald1/Myo1b/Sdc4/Rhog/Trpv4/Sh3pxd2b/Eps8/Tpm4/Hip1/Actn1/Casp4/Ccn2/Coro1c/Cdc42ep2/S100a10/Icam1/Slit2/Ccl11/Gm14137/Rnd1/Tacstd2/Pstpip1/Id1/Cass4/Fam107a/Plek/Csf3	51
GO:0001649	osteoblast differentiation	31/1595	199/23174	1.62291e-05	0.000304384	0.00021561	Cited1/Bmp3/Lgr4/Igfbp5/Ptch1/Sfrp1/Ddx5/Wwtr1/Ilk/Cbfb/Sema4d/Lmna/Creb3l1/Acvr1/Fzd1/Id3/Cebpd/Sh3pxd2b/Cebpb/Pdlim7/Gja1/Ccn4/Junb/Id1/Epha2/Fbn2/Clec5a/Noct/Ccn1/Tnf/Il6	31
GO:1900046	regulation of hemostasis	17/1595	78/23174	1.79306e-05	0.000331191	0.000234598	Prkcq/Tspan8/Cd36/C1qtnf1/Pdgfb/Serpine2/Ubash3b/Pdgfa/Tpsab1/Fcer1g/Anxa2/Thbs1/Pdpn/Selp/Serpine1/Plek/S100a9	17
GO:1905517	macrophage migration	14/1595	56/23174	1.88806e-05	0.000343522	0.000243333	Mif/Trpv4/Cmklr1/Emilin1/Cd200r1/Thbs1/Mcoln2/Lgals3/Csf1/Gpr35/C5ar1/Ccl12/Ccl2/Ccl3	14
GO:0120032	regulation of plasma membrane bounded cell projection assembly	29/1595	182/23174	1.94653e-05	0.000352654	0.000249802	Prkcq/Kit/Cdkl5/Ppp1r9a/Syne2/Arhgap35/Ttbk2/P2rx7/Atg3/Arpc2/Rac1/Capzb/Sept9/Srf/Pfn1/Cfl1/Dynll1/Rhog/Eps8/Atp8b1/Plek2/Coro1c/Cdc42ep2/Icam1/Slit2/Gm14137/Trpm2/Tacstd2/Epha2	29
GO:0045926	negative regulation of growth	39/1595	280/23174	2.10982e-05	0.000376717	0.000266846	Tnr/Kcnk2/Igfbp5/Bcl11a/Sema6c/Pparg/Cd36/Ptch1/Smarca2/Sfrp1/Cdkn1b/Spg20/Ulk2/Pten/Sema4d/Adam15/Trp53/Sema4c/Ifrd1/Cfl1/Myd88/Sema3f/Nod2/Tgfb1/Sertad1/Serpine2/Sema6b/Hif1a/Lgmn/Mndal/Gja1/Slit2/Dusp10/Sema7a/Plac8/Ccr5/Tnf/Gdf15/Inhba	39
GO:0043315	positive regulation of neutrophil degranulation	4/1595	4/23174	2.23623e-05	0.000394838	0.000279683	Ptafr/Itgb2/Cd177/Itgam	4
GO:1902565	positive regulation of neutrophil activation	4/1595	4/23174	2.23623e-05	0.000394838	0.000279683	Ptafr/Itgb2/Cd177/Itgam	4
GO:0060491	regulation of cell projection assembly	29/1595	184/23174	2.40221e-05	0.000420016	0.000297517	Prkcq/Kit/Cdkl5/Ppp1r9a/Syne2/Arhgap35/Ttbk2/P2rx7/Atg3/Arpc2/Rac1/Capzb/Sept9/Srf/Pfn1/Cfl1/Dynll1/Rhog/Eps8/Atp8b1/Plek2/Coro1c/Cdc42ep2/Icam1/Slit2/Gm14137/Trpm2/Tacstd2/Epha2	29
GO:0055094	response to lipoprotein particle	9/1595	25/23174	2.51923e-05	0.000436889	0.000309469	Smpd3/Lpl/Pparg/Cd36/Myd88/Ldlr/Cd68/Fcer1g/Itgb2	9
GO:0006909	phagocytosis	44/1595	334/23174	2.63509e-05	0.000454207	0.000321737	Xkr4/Sftpd/Adipoq/Pparg/Cd36/Appl2/Arhgap12/P2rx7/Pten/Atg3/Txndc5/Rac1/Dysf/Myd88/Lyar/Nod2/Tgfb1/Lrp1/Anxa1/Fcgr3/Fcgr2b/Ldlr/Siglece/Coro1c/Vav1/Rab20/Ncf2/Fcgr1/Fcer1g/Ncf4/Itgb2/Thbs1/Itga2/Sphk1/Tnf/Slc11a1/Fgr/Treml4/Msr1/Ccl2/Fpr2/Il1b/Cd300lf/Ptx3	44
GO:0006874	cellular calcium ion homeostasis	57/1595	474/23174	2.85602e-05	0.000485409	0.000343838	Smpd3/Ccr6/Cacnb4/Nucb2/Inpp4b/Itpr2/Edn1/Ackr2/Plce1/Atp1a2/Dbi/Cd36/Pik3cb/Itpr1/Vdr/Cacnb3/Lpar6/Plcg1/P2rx7/Atp13a3/Lrp6/Atp2c1/Atp13a1/Atf4/Eif5a/Marcksl1/Tpcn2/Trpv4/C1qtnf1/Tmem38b/Tgfb1/Lrp1/Adm/Adcyap1r1/Cmklr1/Ubash3b/Stc1/Gja1/Gpr39/Ptgir/Trpm2/Ccr5/Gpr35/C5ar1/Ccrl2/Cxcr4/Cxcl1/Ccr1/Ngf/Ccl2/Ccl3/Fpr2/Il1b/Cxcr2/Fpr1/Cxcl3/Cxcl2	57
GO:0050818	regulation of coagulation	17/1595	81/23174	3.0162e-05	0.000500758	0.000354711	Prkcq/Tspan8/Cd36/C1qtnf1/Pdgfb/Serpine2/Ubash3b/Pdgfa/Tpsab1/Fcer1g/Anxa2/Thbs1/Pdpn/Selp/Serpine1/Plek/S100a9	17
GO:0043087	regulation of GTPase activity	40/1595	295/23174	3.11591e-05	0.000516186	0.000365639	Prom2/Asap1/Cdkl5/Dock8/Arhgap42/Tbc1d8b/Tbc1d9b/Arhgap35/Arhgap12/Snx13/Arfgef1/Arhgap1/Sema4d/Map2k1/Tbc1d10a/Rangap1/Cblb/Rrp1b/Arrb2/Pkp4/Spry2/Rhog/Mtss2/Picalm/Rasip1/Coro1c/S100a10/Vav1/Icam1/Ccl11/Ccl9/Ccl6/Foxj1/Epha2/Rgs1/Rgs16/Ccl12/Ccl2/Ccl3/Ccl4	40
GO:0006732	coenzyme metabolic process	43/1595	326/23174	3.14069e-05	0.00051928	0.000367831	Mat1a/Acsl1/Hmgcs2/Zbtb20/Prkaa2/Ces1d/Ehhadh/Prxl2c/Coq8a/Aldoc/Nudt7/Far1/Mpc2/Pfkfb2/Nudt12/Ncor1/Acadsb/Pank3/P2rx7/Gpam/Coasy/Foxk1/Mif/Mat2a/Acsl5/Pgam1/Acot8/Trp53/Hmgcr/Adpgk/H6pd/Eif6/Coq10b/Pdss1/Eno2/Ddit4/Ier3/Hif1a/Ncf2/Myc/Mthfd2/Hk3/Cyp4f18	43
GO:0071496	cellular response to external stimulus	39/1595	285/23174	3.16302e-05	0.00052196	0.000369729	Sesn3/Lpl/Rragd/Prkaa2/Bmf/Fads1/Atp1a2/Ncoa1/Pde2a/Vdr/Pik3c2b/Gabarapl1/Arhgap35/Cadps2/P2rx7/Pik3r4/Arhgdia/Bag3/Rac1/Trp53/Rrp8/Atf4/Srf/Sox9/Nos3/Pim1/Mybbp1a/Cradd/Ppan/Cd68/Slc2a1/Zc3h12a/Nr4a2/Fos/Mmp9/Adora2b/Ankrd1/Fam107a/Fosl1	39
GO:0042035	regulation of cytokine biosynthetic process	20/1595	106/23174	3.23836e-05	0.000531303	0.000376347	Prkcq/Tia1/Tlr3/Mast2/Myd88/Cebpb/Ptafr/Fcgr3/Bcl3/Akap12/Errfi1/Zfp36/Foxj1/Thbs1/Prg4/Tnf/Il6/Ereg/Il1b/Nlrp12	20
GO:0006364	rRNA processing	29/1595	187/23174	3.26875e-05	0.000535257	0.000379148	Rnasel/Rpl10a/Ddx56/Usp36/Utp18/Nol6/Nob1/Ebna1bp2/Exosc2/Rpl7l1/Nat10/Rrp8/Bop1/Rrp1b/Ddx21/Ftsj3/Rrp15/Naf1/Mrto4/Nhp2/Nop2/Rpf2/Rrs1/Lyar/Rrp9/Bysl/Las1l/Heatr1/Gar1	29
GO:0032970	regulation of actin filament-based process	49/1595	390/23174	3.33125e-05	0.000543403	0.000384918	Prkcq/Prox1/Limch1/Edn1/Atp1a2/Fhod3/Ppp1r9a/Cd2ap/Arhgap35/Sptbn1/Arfgef1/Ilk/Arhgdia/Arpc2/Rac1/Arpc1b/Capzb/Vasp/Limk1/Dlc1/Pfn1/Cfl1/Abracl/Sdc4/Rhog/Sh3pxd2b/Tgfb1/Eps8/Lrp1/Ccn2/Stc1/Cdc42ep2/S100a10/Pde4b/Icam1/Slit2/Ccl11/Gm14137/Trpm2/Rnd1/Tacstd2/Scn5a/Id1/Bst1/Pdpn/Fam107a/Fgr/Plek/Csf3	49
GO:0106106	cold-induced thermogenesis	24/1595	142/23174	3.72639e-05	0.000595586	0.000421882	Acsl1/Plcl1/Adipoq/Lgr4/Cidea/Per2/Cd36/Appl2/Dync1h1/Pgam5/Atf4/Adam17/Cebpb/Adamts5/Igf1r/Gadd45g/Cmklr1/Gja1/Fabp5/Plac8/Id1/Dio2/Il4ra/Cxcr4	24
GO:0120161	regulation of cold-induced thermogenesis	24/1595	142/23174	3.72639e-05	0.000595586	0.000421882	Acsl1/Plcl1/Adipoq/Lgr4/Cidea/Per2/Cd36/Appl2/Dync1h1/Pgam5/Atf4/Adam17/Cebpb/Adamts5/Igf1r/Gadd45g/Cmklr1/Gja1/Fabp5/Plac8/Id1/Dio2/Il4ra/Cxcr4	24
GO:1901570	fatty acid derivative biosynthetic process	13/1595	52/23174	3.7281e-05	0.000595586	0.000421882	Acsl1/Edn1/Far1/Pnpla8/Mif/Acsl5/Anxa1/Alox5/Fabp5/Alox5ap/Sphk1/Ptgs2/Il1b	13
GO:0055074	calcium ion homeostasis	58/1595	490/23174	3.84464e-05	0.000609629	0.000431829	Smpd3/Ccr6/Cacnb4/Nucb2/Inpp4b/Itpr2/Edn1/Ackr2/Plce1/Atp1a2/Dbi/Cd36/Pik3cb/Itpr1/Vdr/Cacnb3/Lpar6/Plcg1/P2rx7/Atp13a3/Lrp6/Atp2c1/Atp13a1/Atf4/Eif5a/Marcksl1/Tpcn2/Trpv4/C1qtnf1/Tmem38b/Tgfb1/Lrp1/Adm/Adcyap1r1/Cmklr1/Ubash3b/Stc1/Gja1/Gpr39/Ptgir/Trpm2/Ccr5/Scn5a/Gpr35/C5ar1/Ccrl2/Cxcr4/Cxcl1/Ccr1/Ngf/Ccl2/Ccl3/Fpr2/Il1b/Cxcr2/Fpr1/Cxcl3/Cxcl2	58
GO:0045732	positive regulation of protein catabolic process	31/1595	208/23174	3.91707e-05	0.00061881	0.000438332	Adra2a/Amer1/Crebrf/Ppp2r3a/Snx33/Cul4b/Pten/Stub1/Sgta/Sox9/Cblb/Zfand2a/Trim30a/Lrp1/Trib3/Plk2/Trib1/Rnf19b/Ier3/Ldlr/Fbxl5/Gja1/Ecscr/Msn/Tnfrsf1b/Tnfaip3/Nkd2/Plk3/Tnf/Adam8/Il1b	31
GO:0072594	establishment of protein localization to organelle	47/1595	374/23174	4.75042e-05	0.00072361	0.000512567	Prkcq/Chp2/Cry2/Angpt1/Cd36/Vps13a/Pkia/Appl2/Phip/Nipbl/Vps13d/Ddx5/Gcc2/Pik3r4/Chmp4b/Sgta/Phb2/Trim28/Srp9/Ywhaz/Bag3/Timm23/Cdh1/Cox18/Nutf2/Pom121/Lmna/Nxt1/Kpna2/Cct3/Trp53/Spcs3/Sec61b/Cfl1/Tomm40/Nup93/Ran/Tgfb1/Rasl2-9/Rab8b/Nfkbia/Cd68/Zc3h12a/Pmaip1/Fermt1/Tnfaip3/Ptgs2	47
GO:0048679	regulation of axon regeneration	10/1595	33/23174	4.9556e-05	0.000740297	0.000524387	Tnr/Neo1/Ptprf/Pten/Mif/Map2k1/Adam17/Igf1r/Lrp1/Xylt1	10
GO:0009636	response to toxic substance	44/1595	343/23174	5.02e-05	0.000748605	0.000530272	Smpd3/Kcnc2/Cyp2f2/Ephx2/Abcg2/Ces1d/Itpr2/Atp1a2/Cd36/Ephx1/Ppp1r9a/Mbp/Pten/Apex1/Sigmar1/Trp53/Cfl1/Nos3/Ppif/Actb/Igf1r/Eps8/Anxa1/Pdgfb/Timeless/Sod2/Ripk3/Hmox1/Hif1a/Pde1b/Zc3h12a/Nr4a2/Trpm2/Mt2/Cyp1b1/Tnfaip3/Sphk1/Hk3/Tnf/Rdh12/Slc7a11/Il6/Ccl4/Nr4a3	44
GO:0032388	positive regulation of intracellular transport	30/1595	201/23174	5.04042e-05	0.000750336	0.000531498	Chrm1/Prkcq/Chp2/Syt9/Crebrf/Cacnb3/Tcaf1/Kif3a/Dync1h1/Trim28/Ldlrap1/Arpc2/Ptpn23/Bag3/Cdh1/Nutf2/Ran/Ehd1/Tgfb1/Msn/Zc3h12a/Fcer1g/Sfn/Anxa2/Plk3/Il4ra/Adora2b/Fgr/Ccl2/Ptgs2	30
GO:2000116	regulation of cysteine-type endopeptidase activity	32/1595	221/23174	5.26829e-05	0.000779916	0.000552452	Dapk1/Pparg/Rps6ka3/Cdh1/Tbc1d10a/Dlc1/Arrb2/Cradd/Nle1/Birc3/Hip1/Casp4/Ccn2/Lgmn/Pmaip1/Myc/Sfn/Thbs1/Nr4a1/Mmp9/Ccn1/Tnf/Cd44/Plaur/Il24/Nlrp3/Il6/Ptgs2/Mefv/S100a8/Nlrp12/S100a9	32
GO:0097006	regulation of plasma lipoprotein particle levels	14/1595	61/23174	5.29409e-05	0.000779916	0.000552452	Adipoq/Lpl/Ces1d/Cd36/Vldlr/Ldlrap1/Ehd1/Ldlr/Pla2g7/Soat1/Lipg/Anxa2/Msr1/Soat2	14
GO:0150076	neuroinflammatory response	14/1595	61/23174	5.29409e-05	0.000779916	0.000552452	Pparg/Tlr3/Lrp1/Ldlr/Cd200r1/Tnfrsf1b/Sphk1/Tnf/C5ar1/Cd200r4/Fpr2/Mmp8/Ptgs2/Il1b	14
GO:0050777	negative regulation of immune response	25/1595	155/23174	5.77928e-05	0.000839771	0.00059485	Pparg/Angpt1/Samhd1/Cactin/Dhx58/Selenos/Arrb2/Nod2/Tgfb1/Anxa1/Fcgr2b/Hmox1/Zc3h12a/Dusp10/Arg2/Cd84/Fgl2/Foxj1/Tnfaip3/Lgals3/Il4ra/Tnf/Ccr1/Olfm4/Acod1	25
GO:0031334	positive regulation of protein complex assembly	34/1595	243/23174	6.32318e-05	0.000906429	0.000642067	Tppp/Bmf/Asap1/Cd36/Cdk5rap2/Cdkn1b/Mpp7/Pde4dip/Stub1/Mapre1/Psmc4/Arpc2/Wars/Rac1/Arpc1b/Trp53/G3bp1/Srf/Vasp/Pfn1/Tgfb1/Cdt1/Map1b/Rasip1/Cdc42ep2/Msn/Icam1/Ccl11/Gm14137/Mmp3/Tnf/Plek/Fosl1/Csf3	34
GO:0009991	response to extracellular stimulus	49/1595	400/23174	6.36548e-05	0.000910959	0.000645276	Sesn3/Lpl/Rragd/Nucb2/Prkaa2/Bmf/Fads1/Pparg/Ncoa1/Vdr/Pik3c2b/Appl2/Gabarapl1/Arhgap35/Cadps2/Ulk2/P2rx7/Foxk1/Pik3r4/Lrp6/Trp53/Rrp8/Atf4/Srf/Plec/Pim1/Trpv4/Mybbp1a/Ppan/Igf1r/Sod2/Slc25a25/Ada/Ldlr/Cd68/Gpr39/Slc2a1/Zc3h12a/Nr4a2/Fos/Zfp36/Rasgrp4/Noct/Mmp9/Adora2b/Gdf15/Fam107a/Fosl1/Il1b	49
GO:0045624	positive regulation of T-helper cell differentiation	8/1595	22/23174	6.60506e-05	0.000935809	0.000662878	Shb/Anxa1/Myb/Nfkbid/Il4ra/Il23a/Nlrp3/Il6	8
GO:2000178	negative regulation of neural precursor cell proliferation	9/1595	28/23174	7.05366e-05	0.000989488	0.000700901	Lims2/Appl2/Ilk/Trp53/Tgfb1/Kctd11/Ccr5/Bdnf/Il1b	9
GO:0035425	autocrine signaling	5/1595	8/23174	7.20871e-05	0.00100792	0.000713956	Fzd1/Cd68/Hilpda/S100a8/S100a9	5
GO:0042088	T-helper 1 type immune response	12/1595	48/23174	7.37831e-05	0.00102157	0.000723624	Il6ra/Il18bp/Gadd45g/Anxa1/Bcl3/Relb/Il1r1/Il4ra/Slc11a1/Il23a/Il18rap/Il1b	12
GO:0034250	positive regulation of cellular amide metabolic process	23/1595	139/23174	7.52225e-05	0.00103644	0.000734159	Smpd3/Rmnd1/Eef2/Ddx39b/Eif4a3/Nat10/Eif5a/Eif6/Polr2d/Nod2/Picalm/Ptafr/Bcl3/Piwil2/Gsap/Krt17/Thbs1/Cyp1b1/Plk3/Itga2/Ccn1/Tnf/Il6	23
GO:0007599	hemostasis	25/1595	158/23174	7.96684e-05	0.0010854	0.000768842	Prkcq/F8/Tspan8/Cd36/Pik3cb/Srf/C1qtnf1/Rap2b/Entpd1/Pdgfb/Serpine2/Ubash3b/Pdgfa/Tpsab1/Pf4/Fcer1g/Anxa2/Thbs1/Pdpn/Selp/Serpine1/Plek/Slc7a11/F10/S100a9	25
GO:0006914	autophagy	47/1595	383/23174	8.52304e-05	0.00115014	0.000814697	Depp1/Sesn3/Rragd/Prkaa2/Bmf/Dapk1/Pik3cb/Vps13a/Klhl22/Pik3c2b/Gabarapl1/Rubcn/Fyco1/Ulk2/Vps13d/Foxk1/Pik3r4/Herc1/Stub1/Chmp4b/Atg3/Usp10/Map2k1/Bag3/Usp36/Lix1l/Trp53/Mcl1/Tmem150a/Tmem173/Trim8/Tpcn2/Nod2/Trim30a/Trib3/Plk2/Rasip1/Hmox1/Hif1a/Zc3h12a/Cd84/Tnfaip3/Atg9b/Plk3/Mefv/S100a8/S100a9	47
GO:0061919	process utilizing autophagic mechanism	47/1595	383/23174	8.52304e-05	0.00115014	0.000814697	Depp1/Sesn3/Rragd/Prkaa2/Bmf/Dapk1/Pik3cb/Vps13a/Klhl22/Pik3c2b/Gabarapl1/Rubcn/Fyco1/Ulk2/Vps13d/Foxk1/Pik3r4/Herc1/Stub1/Chmp4b/Atg3/Usp10/Map2k1/Bag3/Usp36/Lix1l/Trp53/Mcl1/Tmem150a/Tmem173/Trim8/Tpcn2/Nod2/Trim30a/Trib3/Plk2/Rasip1/Hmox1/Hif1a/Zc3h12a/Cd84/Tnfaip3/Atg9b/Plk3/Mefv/S100a8/S100a9	47
GO:0043547	positive regulation of GTPase activity	31/1595	217/23174	8.83938e-05	0.00118429	0.000838891	Asap1/Cdkl5/Dock8/Arhgap42/Tbc1d8b/Tbc1d9b/Arhgap35/Snx13/Sema4d/Map2k1/Tbc1d10a/Rangap1/Pkp4/Rhog/Mtss2/Picalm/Coro1c/S100a10/Vav1/Icam1/Ccl11/Ccl9/Ccl6/Foxj1/Epha2/Rgs1/Rgs16/Ccl12/Ccl2/Ccl3/Ccl4	31
GO:0150077	regulation of neuroinflammatory response	9/1595	29/23174	9.60581e-05	0.0012642	0.00089549	Pparg/Ldlr/Cd200r1/Tnfrsf1b/Sphk1/C5ar1/Cd200r4/Mmp8/Ptgs2	9
GO:0032956	regulation of actin cytoskeleton organization	43/1595	342/23174	9.6659e-05	0.00127014	0.000899701	Prkcq/Prox1/Limch1/Edn1/Fhod3/Ppp1r9a/Cd2ap/Arhgap35/Sptbn1/Arfgef1/Ilk/Arhgdia/Arpc2/Rac1/Arpc1b/Capzb/Vasp/Limk1/Dlc1/Pfn1/Cfl1/Sdc4/Rhog/Sh3pxd2b/Tgfb1/Eps8/Lrp1/Ccn2/Cdc42ep2/S100a10/Icam1/Slit2/Ccl11/Gm14137/Trpm2/Rnd1/Tacstd2/Id1/Bst1/Fam107a/Fgr/Plek/Csf3	43
GO:0045862	positive regulation of proteolysis	41/1595	321/23174	9.81574e-05	0.00128784	0.000912241	Adra2a/Dapk1/Pparg/Snx33/Mbp/Pten/Stub1/Sgta/Psme3/Ruvbl1/Tbc1d10a/Dlc1/Cfl1/Cradd/Tnip1/Zfand2a/Picalm/Trib3/Plk2/Hip1/Trib1/Casp4/Ccn2/Rnf19b/Lgmn/Ecscr/Zc3h12a/Pmaip1/Myc/Tnfrsf1b/Nkd2/Plk3/Ccn1/Tnf/Adam8/Il24/Nlrp3/Mefv/Il1b/S100a8/S100a9	41
GO:0090118	receptor-mediated endocytosis involved in cholesterol transport	4/1595	5/23174	0.000105669	0.00136744	0.000968621	Lrp6/Ldlrap1/Ldlr/Anxa2	4
GO:0009615	response to virus	36/1595	270/23174	0.000107202	0.00138233	0.000979168	Mill2/Rnasel/Ifit2/Trim6/Samhd1/Gpam/Tlr3/Dhx58/G3bp1/Traf3ip2/Rrp1b/Ddx21/Tmem173/Myd88/Oas2/Trim30a/Ddit4/Ifitm3/Bcl3/Isg15/Ifitm2/Ikbke/Oasl1/Zc3h12a/Fgl2/Trim15/Oas3/Tlr13/Tnf/Ifitm1/Ifitm6/Treml4/Il23a/Nlrp3/Il6/Il1b	36
GO:1902903	regulation of supramolecular fiber organization	43/1595	345/23174	0.000117899	0.00148893	0.00105468	Prkcq/Prox1/Limch1/Edn1/Fhod3/Ppp1r9a/Cdk5rap2/Cdkn1b/Arhgap35/Ttbk2/Pde4dip/Sptbn1/Arfgef1/Mapre1/Arpc2/Rac1/Arpc1b/Capzb/Vasp/Limk1/Dlc1/Pfn1/Cfl1/Dysf/Sdc4/Trpv4/Sh3pxd2b/Eps8/Map1b/Ccn2/Ldlr/Cdc42ep2/S100a10/Icam1/Slit2/Ccl11/Gm14137/Sgk1/Emilin1/Tacstd2/Id1/Plek/Csf3	43
GO:0033750	ribosome localization	6/1595	13/23174	0.000118526	0.00148893	0.00105468	Ltv1/Sdad1/Eif6/Zfp593/Rrs1/Ran	6
GO:0000302	response to reactive oxygen species	29/1595	201/23174	0.000123231	0.00154084	0.00109145	Smpd3/Kcnc2/Sesn3/Ucp3/Cd36/Egln1/Bcar1/Apex1/Sigmar1/Trp53/Cfl1/Nos3/Ppif/Anxa1/Sod2/Ripk3/Hmox1/Fos/Trpm2/Thbs1/Cyp1b1/Tnfaip3/Plk3/Sphk1/Mmp9/Hk3/Tnf/Il6/Nr4a3	29
GO:0062014	negative regulation of small molecule metabolic process	18/1595	99/23174	0.000129828	0.00161621	0.00114484	Smpd3/Prox1/Adipoq/Dbi/Pde2a/Appl2/Pde12/Trp53/Ppif/Ddit4/Tgfb1/Trib3/Entpd1/Ier3/Pid1/Snai1/Plek/Il6	18
GO:1904659	glucose transmembrane transport	19/1595	108/23174	0.00013472	0.00165532	0.00117254	Slc2a9/Adipoq/Edn1/Rnasel/Crebl2/Appl2/Yes1/Mif/Trib3/Sh2b2/Ak1/Slc2a1/Myc/Fabp5/Pid1/Slc2a3/Tnf/Nr4a3/Il1b	19
GO:0035150	regulation of tube size	26/1595	173/23174	0.000138442	0.0016986	0.0012032	Smpd3/Adra2a/Per2/Edn1/Atp1a2/Gucy1a1/Adcy6/Arhgap42/Map2k1/Hmgcr/Nos3/Ece1/Foxc1/Manf/Ptafr/Pdgfb/Adm/Sod2/Hif1a/Gja1/Dusp5/Icam1/Alox5/Tnf/Adora2b/Ptgs2	26
GO:0000027	ribosomal large subunit assembly	10/1595	37/23174	0.000144786	0.00176374	0.00124934	Rsl24d1/Mrpl20/Bop1/Ddx28/Mrto4/Nop2/Rpf2/Rrs1/Nle1/Ppan	10
GO:0050919	negative chemotaxis	11/1595	44/23174	0.000146425	0.00178116	0.00126168	Robo2/Lgr4/Sema6c/Sema4d/Sema4c/Sema3f/Sema6b/Pdgfa/Slit2/Sema7a/Nrg1	11
GO:0048144	fibroblast proliferation	19/1595	109/23174	0.000152792	0.00183706	0.00130128	Dach1/Pparg/Sfrp1/Mif/B4galt7/Trp53/Tgfb1/Fosl2/Pdgfb/Tgif1/Sod2/Pdgfa/Pmaip1/Myc/Anxa2/Sphk1/Mmp9/Serpine1/Ereg	19
GO:0002604	regulation of dendritic cell antigen processing and presentation	5/1595	9/23174	0.000152968	0.00183706	0.00130128	Nod2/Cd68/Fgl2/Thbs1/Slc11a1	5
GO:0031622	positive regulation of fever generation	5/1595	9/23174	0.000152968	0.00183706	0.00130128	Tnfrsf11a/Ccr5/Tnf/Ptgs2/Il1b	5
GO:0042593	glucose homeostasis	35/1595	265/23174	0.000160077	0.00189841	0.00134473	Adra2a/Sesn3/Adipoq/Zbtb20/Igfbp5/Cry2/Prkaa2/Pparg/Cd36/Gprc5b/Pde3b/Ptch1/Mpc2/Appl2/Adgrf5/Rab11fip5/Hectd4/Foxk1/Tra2b/Map2k1/Rac1/Pim3/Hmgcr/Dynll1/Trpv4/Igf1r/Lrp1/Hif1a/Sh2b2/Gpr39/Icam1/Ccn4/Fabp5/Hk3/Il6	35
GO:0016052	carbohydrate catabolic process	22/1595	138/23174	0.000186385	0.00212744	0.00150697	Zbtb20/Prkaa2/Sord/Prxl2c/Pygb/Aldoc/Pfkfb2/Ncor1/P2rx7/Foxk1/Mif/Pgam1/Trp53/Adpgk/Eif6/Eno2/Ddit4/Ier3/Hif1a/Myc/Hk3/Chil3	22
GO:0120031	plasma membrane bounded cell projection assembly	55/1595	486/23174	0.000196245	0.00221035	0.0015657	Prkcq/Kit/Ehd3/Ablim3/Asap1/Cdkl5/Bbs9/Ablim1/Lrrc61/Ppp1r9a/Wdr19/Syne2/Tnik/Tbc1d32/Rpgrip1l/Ift172/Arhgap35/Ttbk2/C2cd3/Ssx2ip/P2rx7/Kif3a/Wwtr1/Atg3/Arpc2/Ptpn23/Rac1/Capzb/Sept9/E2f4/Srf/Pfn1/Cfl1/Dynll1/B9d2/Rhog/Mtss2/Ehd1/Eps8/Atp8b1/Plek2/Parvb/Abcc4/Coro1c/Cdc42ep2/Emp3/Icam1/Slit2/Gm14137/Trpm2/Tacstd2/Foxj1/Epha2/Emp1/Celsr3	55
GO:0015931	nucleobase-containing compound transport	26/1595	178/23174	0.000220891	0.00242695	0.00171912	Nxf7/Tst/Slc29a3/P2rx7/Tnks/Ddx39b/Nol6/Pom121/Slc35b1/Alyref/Nxt1/Ltv1/Sdad1/Eif5a/Zfp36l1/Eif6/Polr2d/Zfp593/Nup93/Rrs1/Ran/Ddx39/Igf2bp2/Slc25a24/Gja1/Zfp36	26
GO:0051495	positive regulation of cytoskeleton organization	30/1595	218/23174	0.000223045	0.00243804	0.00172698	Prkcq/Prox1/Limch1/Edn1/Cdk5rap2/Cdkn1b/Pde4dip/Dync1h1/Mapre1/Arpc2/Rac1/Arpc1b/Vasp/Ranbp1/Limk1/Pfn1/Cfl1/Sdc4/Trpv4/Sh3pxd2b/Map1b/Ccn2/Cdc42ep2/S100a10/Icam1/Ccl11/Gm14137/Id1/Plek/Csf3	30
GO:1901617	organic hydroxy compound biosynthetic process	31/1595	229/23174	0.000238083	0.00259242	0.00183634	Cited1/Plcl1/Hmgcs2/Prox1/Cyp27a1/Per2/Prkaa2/Ces1d/Plce1/Ephx1/Vdr/Asah2/Sec14l2/Fdft1/Plcg1/Trp53/Hmgcr/Msmo1/Ptafr/Adcyap1r1/Nr4a2/Cd244a/Sphk1/Tnf/Snai1/Cyp7b1/Plek/Slc7a11/Ch25h/Il1b/Hdc	31
GO:0097746	regulation of blood vessel diameter	24/1595	160/23174	0.000252984	0.00270283	0.00191455	Smpd3/Adra2a/Per2/Edn1/Atp1a2/Gucy1a1/Adcy6/Arhgap42/Map2k1/Hmgcr/Ece1/Manf/Ptafr/Pdgfb/Adm/Sod2/Hif1a/Gja1/Dusp5/Icam1/Alox5/Tnf/Adora2b/Ptgs2	24
GO:0021915	neural tube development	27/1595	190/23174	0.000266664	0.00283476	0.002008	Ptch1/Sfrp1/Wdr19/Tbc1d32/Rpgrip1l/Ift172/Arhgap35/Ttbk2/C2cd3/Kif3a/Lrp6/Opa1/Sema4c/Vasp/Dlc1/Kat2a/Pfn1/Cfl1/Zfp36l1/Fzd1/Sdc4/Tgfb1/Tgif1/Adm/Hes1/Hif1a/Epha2	27
GO:0010035	response to inorganic substance	55/1595	493/23174	0.000281481	0.00298111	0.00211166	Atp12a/Smpd3/Kcnc2/Chp2/Prkaa2/Syt9/Sord/Ucp3/Pparg/Cd36/Ptch1/Cdkn1b/Atrx/Egln1/P2rx7/Cdh1/Bcar1/Apex1/Sigmar1/Trp53/Homer1/Cfl1/Nos3/Ppif/Clic4/S100a16/Krt8/Anxa1/Timeless/Sod2/Ripk3/Hmox1/Lgmn/Slc25a24/Gpr39/Zc3h12a/Nr4a2/Junb/Fos/Trpm2/Mt2/Scn5a/Alox5ap/Thbs1/Cyp1b1/Tnfaip3/Nr4a1/Sphk1/Mmp9/Hk3/Tnf/Fosb/Nptx1/Il6/Nr4a3	55
GO:0099173	postsynapse organization	27/1595	191/23174	0.000290604	0.00306107	0.0021683	Srcin1/Cdkl5/Ppp1r9a/Ophn1/Lrp4/Ptprf/Egln1/Pten/Mfn1/Opa1/Chmp4b/Arf4/Nlgn2/Homer1/Cfl1/Prmt3/Sema3f/Actb/Igf1r/Actn1/Fcgr2b/Etv5/Lgmn/Nptxr/Srgn/Nptx1/Slc7a11	27
GO:0110111	negative regulation of animal organ morphogenesis	10/1595	40/23174	0.000291547	0.00306107	0.0021683	Cited1/Thrb/Nfib/Lims2/Bcor/Lrp6/Foxc1/Tacstd2/Tnfrsf11b/Tnf	10
GO:0001666	response to hypoxia	28/1595	202/23174	0.000315013	0.00324738	0.00230027	Kcnk2/Itpr2/Edn1/Ucp3/Vldlr/Itpr1/Egln1/Pten/Stub1/Map2k1/Trp53/P4hb/Adam17/Zfp36l1/Ece1/Flt1/Vasn/Ddit4/Fosl2/Hyou1/Hmox1/Ada/Hif1a/Nr4a2/Ddah1/Myc/Plk3/Adam8	28
GO:0001505	regulation of neurotransmitter levels	44/1595	372/23174	0.000320183	0.00329668	0.0023352	Smpd3/Adra2a/Cacnb4/Nr3c2/Per2/Syt9/Atp1a2/Rims3/Cd36/Ppp1r9a/Aldh6a1/Cadps2/Aasdh/P2rx7/Rap1b/Rac1/Selenos/Tha1/Dynll1/Nos3/Tmem106a/Syn2/Sod2/Gla/Klf2/Pde1b/Zc3h12a/Icam1/Ddah1/Itgb2/Sept5/Cyp1b1/Sphk1/Tnf/Adora2b/Stx11/Ngf/Slc7a11/Il6/Mmp8/Ptgs2/Il1b/Hdc/Ptx3	44
GO:0031668	cellular response to extracellular stimulus	30/1595	223/23174	0.000331488	0.00338443	0.00239736	Sesn3/Lpl/Rragd/Prkaa2/Bmf/Fads1/Ncoa1/Vdr/Pik3c2b/Gabarapl1/Arhgap35/Cadps2/P2rx7/Pik3r4/Trp53/Rrp8/Atf4/Srf/Pim1/Mybbp1a/Ppan/Cd68/Slc2a1/Zc3h12a/Nr4a2/Fos/Mmp9/Adora2b/Fam107a/Fosl1	30
GO:2000727	positive regulation of cardiac muscle cell differentiation	8/1595	27/23174	0.000336411	0.00340612	0.00241271	Edn1/Nr3c1/Ddx39b/Kat2a/Arrb2/Tgfb1/Ccn4/Nrg1	8
GO:0006509	membrane protein ectodomain proteolysis	10/1595	41/23174	0.000362038	0.00359715	0.00254803	Prkcq/Adra2a/Snx33/P2rx7/Adam17/Tnfrsf1b/Tnf/Timp1/Adam8/Il1b	10
GO:0071166	ribonucleoprotein complex localization	13/1595	65/23174	0.000417511	0.00412425	0.0029214	Nxf7/Ddx39b/Nol6/Ltv1/Sdad1/Eif5a/Eif6/Polr2d/Zfp593/Nup93/Rrs1/Ran/Ddx39	13
GO:0035335	peptidyl-tyrosine dephosphorylation	8/1595	28/23174	0.000442761	0.00432849	0.00306607	Ptprf/Ptpn12/Ubash3b/Dusp5/Dusp4/Dusp10/Dusp6/Dusp1	8
GO:0051607	defense response to virus	30/1595	227/23174	0.000449539	0.00437966	0.00310232	Mill2/Rnasel/Ifit2/Trim6/Samhd1/Gpam/Tlr3/Dhx58/G3bp1/Traf3ip2/Ddx21/Tmem173/Oas2/Trim30a/Ddit4/Ifitm3/Isg15/Ifitm2/Oasl1/Zc3h12a/Fgl2/Trim15/Oas3/Ifitm1/Ifitm6/Treml4/Il23a/Nlrp3/Il6/Il1b	30
GO:0002467	germinal center formation	6/1595	16/23174	0.000462106	0.00449182	0.00318177	Adam17/Nfkb2/Bcl3/Ada/Foxj1/Tnfaip3	6
GO:0002831	regulation of response to biotic stimulus	22/1595	147/23174	0.000463306	0.00449322	0.00318276	Mill2/Trim6/Mif/Cactin/Dhx58/Traf3ip2/Tmem173/Nod2/Pvr/Trib1/Zc3h12a/Arg2/Cd84/Fgl2/Tnfaip3/Trim15/Cxcl1/Treml4/Il23a/Il1b/Cxcl5/Acod1	22
GO:0034381	plasma lipoprotein particle clearance	9/1595	35/23174	0.000465271	0.00449692	0.00318538	Adipoq/Cd36/Vldlr/Ldlrap1/Ehd1/Ldlr/Lipg/Anxa2/Msr1	9
GO:0002468	dendritic cell antigen processing and presentation	5/1595	11/23174	0.000499037	0.00473914	0.00335696	Nod2/Cd68/Fgl2/Thbs1/Slc11a1	5
GO:0042368	vitamin D biosynthetic process	5/1595	11/23174	0.000499037	0.00473914	0.00335696	Cyp27a1/Vdr/Tnf/Snai1/Il1b	5
GO:0009895	negative regulation of catabolic process	36/1595	292/23174	0.000499237	0.00473914	0.00335696	Adra2a/Cidea/Bmf/Dbi/Pde3b/Klhl22/Ophn1/Rubcn/Foxk1/Herc1/Chmp4b/Sgta/Ybx1/Usp36/Sf3b3/Trp53/Mcl1/Hmgcr/Naf1/Dysf/Myd88/Ddit4/Rasip1/Serpine2/Ier3/Hmox1/Zfp36/Anxa2/Tnfaip3/Noct/Nrg1/Tnf/Slc11a1/Timp1/Hcar2/Il1b	36
GO:0007163	establishment or maintenance of cell polarity	29/1595	219/23174	0.000536727	0.00507803	0.00359701	Cdk5rap2/Dock8/Ophn1/Dlg3/Syne2/Rpgrip1l/Arhgap35/Amotl1/Kif3a/Mpp5/Arfgef1/Ilk/Cap1/Rap1b/Arf4/Lmna/Cfl1/Frmd4a/Spry2/Rhog/Igf1r/Map1b/Hes1/Parvb/Gja1/Msn/Fermt1/Rnd1/Foxj1	29
GO:0120192	tight junction assembly	10/1595	43/23174	0.000545902	0.00514768	0.00364635	Pof1b/Mpp7/Mpp5/Cdh1/Srf/Gja1/Epha2/Nphp4/Tnf/Snai1	10
GO:0006939	smooth muscle contraction	18/1595	111/23174	0.000560771	0.00527038	0.00373326	Smpd3/Adra2a/Kit/Edn1/Atp1a2/Gucy1a1/Arhgap42/Map2k1/Srf/Tpcn2/Cald1/Ptafr/Ada/Itga2/Sphk1/Adora2b/Ptgs2/Prok2	18
GO:0009914	hormone transport	43/1595	372/23174	0.000602441	0.00560021	0.00396689	Smpd3/Adra2a/Kcnq1/Adipoq/Nucb2/Cry2/Per2/Edn1/Syt9/Pparg/Pde3b/Sfrp1/Mpc2/Sirt3/Rab11fip5/Pfkfb2/Ywhaz/Rac1/Pim3/Nlgn2/Midn/Hmgcr/Dynll1/Trpv4/C1qtnf1/Cpe/Lrp1/Anxa1/Adm/Rab8b/Hif1a/Gja1/Gpr39/Trpm2/Dio2/Lif/Tnf/Hcar2/Il6/Il1b/Il1rn/Osm/Inhba	43
GO:1900407	regulation of cellular response to oxidative stress	15/1595	85/23174	0.000638592	0.00589762	0.00417757	Cd36/Fut8/Trp53/Atf4/Mcl1/P4hb/Fzd1/Sod2/Hif1a/Trpm2/Mmp3/Hk3/Tnf/Slc7a11/Nr4a3	15
GO:1902882	regulation of response to oxidative stress	16/1595	94/23174	0.000646802	0.00596698	0.00422669	Sesn3/Cd36/Fut8/Trp53/Atf4/Mcl1/P4hb/Fzd1/Sod2/Hif1a/Trpm2/Mmp3/Hk3/Tnf/Slc7a11/Nr4a3	16
GO:0150094	amyloid-beta clearance by cellular catabolic process	4/1595	7/23174	0.000660927	0.006052	0.00428692	Cd36/Lrp4/Lrp1/Ldlr	4
GO:0071385	cellular response to glucocorticoid stimulus	10/1595	44/23174	0.000663395	0.006052	0.00428692	Crebrf/Nr3c1/Eif4e/Zfp36l1/Ddit4/Tgfb1/Anxa1/Sgk1/Zfp36/Fam107a	10
GO:0045927	positive regulation of growth	37/1595	308/23174	0.000689034	0.0062086	0.00439784	Prox1/Fgfr2/Bcl11a/Edn1/Cdkl5/Klhl22/Sfrp1/Nr3c1/Gpam/Nipbl/Ilk/Ddx39b/Sema4d/Ppib/Exosc2/Srf/Limk1/Adam17/Cfl1/Pim1/Sh3pxd2b/Picalm/Lrp1/Map1b/Ccn4/Sgk1/Sema7a/Krt17/Sfn/Sphk1/Nrg1/Csf1/Bdnf/Serpine1/Cxcr4/Hbegf/Ngf	37
GO:0050807	regulation of synapse organization	33/1595	265/23174	0.000702643	0.00629344	0.00445794	Slitrk4/Srcin1/Cdkl5/Rims3/Ppp1r9a/Lrp4/Ptprf/Egln1/Pten/Mfn1/Opa1/Chmp4b/Arf4/Ywhaz/Sema4d/Nlgn2/Tubb5/Homer1/Cfl1/Fzd1/Sema3f/Picalm/Fcgr2b/Etv5/Tpbg/Tuba1a/Amigo3/Nptxr/Tnf/Bdnf/Srgn/Nptx1/Slc7a11	33
GO:1905039	carboxylic acid transmembrane transport	17/1595	104/23174	0.000718573	0.00642041	0.00454788	Slc7a10/Per2/Mpc2/Acsl5/Slc7a7/Abcc1/Slc19a1/Slc7a5/Slc7a1/Myc/Emb/Slc7a8/Thbs1/Slc38a1/Tnf/Slc7a11/Slc16a3	17
GO:0006898	receptor-mediated endocytosis	29/1595	223/23174	0.000721222	0.00643732	0.00455986	Angpt1/Cd36/Vldlr/Timd2/Cd2ap/Ankrd13d/Ophn1/Kif3a/Lrp6/Cap1/Ldlrap1/Reps1/Arrb2/Picalm/Lrp1/Hip1/Ifitm3/Adm/Fcgr2b/Ldlr/Fcgr1/Fcer1g/Itgb2/Anxa2/Serpine1/Sele/Msr1/Fpr2/Cxcr2	29
GO:0042092	type 2 immune response	9/1595	37/23174	0.000723649	0.00644548	0.00456564	Crlf2/Nod2/Ecm1/Anxa1/Bcl3/Arg2/Il4ra/Nlrp3/Il6	9
GO:1901385	regulation of voltage-gated calcium channel activity	9/1595	37/23174	0.000723649	0.00644548	0.00456564	Cacnb4/Cacnb1/Ehd3/Cacnb3/Cbarp/Dysf/Rem2/Pde4b/Gpr35	9
GO:0043312	neutrophil degranulation	5/1595	12/23174	0.000807082	0.00709949	0.0050289	Ptafr/Itgb2/Cd177/Itgam/Stx11	5
GO:0099175	regulation of postsynapse organization	19/1595	124/23174	0.00081975	0.00718973	0.00509283	Srcin1/Cdkl5/Ppp1r9a/Lrp4/Ptprf/Egln1/Pten/Mfn1/Opa1/Chmp4b/Arf4/Homer1/Cfl1/Sema3f/Fcgr2b/Nptxr/Srgn/Nptx1/Slc7a11	19
GO:0120162	positive regulation of cold-induced thermogenesis	16/1595	96/23174	0.000819874	0.00718973	0.00509283	Acsl1/Adipoq/Per2/Cd36/Appl2/Dync1h1/Cebpb/Igf1r/Gadd45g/Cmklr1/Gja1/Fabp5/Plac8/Dio2/Il4ra/Cxcr4	16
GO:0071248	cellular response to metal ion	22/1595	154/23174	0.000880252	0.00763948	0.00541141	Smpd3/Chp2/Prkaa2/Syt9/Pparg/Cdkn1b/Cdh1/Ppif/Clic4/Hmox1/Lgmn/Slc25a24/Gpr39/Junb/Fos/Trpm2/Mt2/Scn5a/Alox5ap/Mmp9/Fosb/Nptx1	22
GO:0097756	negative regulation of blood vessel diameter	17/1595	106/23174	0.000896669	0.00772787	0.00547402	Smpd3/Per2/Edn1/Atp1a2/Arhgap42/Map2k1/Hmgcr/Manf/Ptafr/Pdgfb/Adm/Hif1a/Gja1/Dusp5/Icam1/Alox5/Ptgs2	17
GO:1902117	positive regulation of organelle assembly	14/1595	79/23174	0.000915488	0.00786617	0.00557198	Prox1/Edn1/Asap1/Arhgap35/Ttbk2/Dync1h1/Arpc2/Sept9/G3bp1/Dynll1/Sdc4/Sdc1/Msn/Tnf	14
GO:0045667	regulation of osteoblast differentiation	21/1595	145/23174	0.000953272	0.00803674	0.00569281	Cited1/Igfbp5/Ptch1/Sfrp1/Ddx5/Ilk/Sema4d/Lmna/Acvr1/Id3/Cebpd/Cebpb/Pdlim7/Gja1/Ccn4/Id1/Fbn2/Noct/Ccn1/Tnf/Il6	21
GO:0010256	endomembrane system organization	43/1595	381/23174	0.000979329	0.00819154	0.00580246	Zpbp2/Xkr4/Cavin2/Fam160a2/Ehd3/Plscr4/Asap1/Syne2/Snx33/Atl3/Tmem170/Pde4dip/P2rx7/Pten/Gcc2/Mpp5/Rtn3/Sptbn1/Arfgef1/Chmp4b/Sgta/Tmed9/Ywhaz/Gorasp2/Map2k1/Pi4k2a/Prmt5/Lmna/Kifc3/Dysf/Nup93/Tmem38b/Mtss2/A4galt/Atp8b1/Serpine2/Coro1c/Atp8b4/Plk3/Atp8b5/Srgn/Cxcr4/S100a9	43
GO:1905475	regulation of protein localization to membrane	25/1595	186/23174	0.00101058	0.00840343	0.00595255	Cnst/Cacnb3/Lrp4/Tnik/Tmbim1/Tcaf1/Sptbn1/Ldlrap1/Arpc2/Map2k1/Nlgn2/Actb/Rhog/Picalm/Tgfb1/Lrp1/Mrap/Pmaip1/Pid1/Epha2/Nkd2/Lgals3/Tnf/Ccl2/Slc7a11	25
GO:0001802	type III hypersensitivity	3/1595	4/23174	0.00123481	0.00979248	0.00693648	Fcgr3/Fcgr1/Fcer1g	3
GO:0001803	regulation of type III hypersensitivity	3/1595	4/23174	0.00123481	0.00979248	0.00693648	Fcgr3/Fcgr1/Fcer1g	3
GO:0001805	positive regulation of type III hypersensitivity	3/1595	4/23174	0.00123481	0.00979248	0.00693648	Fcgr3/Fcgr1/Fcer1g	3
GO:0046136	positive regulation of vitamin metabolic process	3/1595	4/23174	0.00123481	0.00979248	0.00693648	Rdh10/Tnf/Il1b	3
GO:2000589	regulation of metanephric mesenchymal cell migration	3/1595	4/23174	0.00123481	0.00979248	0.00693648	Adipoq/Pdgfb/Pdgfa	3
GO:0010755	regulation of plasminogen activation	5/1595	13/23174	0.00123743	0.00979248	0.00693648	Ruvbl1/Serpine2/Anxa2/Thbs1/Serpine1	5
GO:0051236	establishment of RNA localization	21/1595	148/23174	0.00124344	0.00981266	0.00695077	Nxf7/Tst/Tnks/Ddx39b/Nol6/Pom121/Alyref/Nxt1/Ltv1/Sdad1/Eif5a/Zfp36l1/Eif6/Polr2d/Zfp593/Nup93/Rrs1/Ran/Ddx39/Igf2bp2/Zfp36	21
GO:1905153	regulation of membrane invagination	6/1595	19/23174	0.00130907	0.0101797	0.00721074	Pparg/Cd36/Appl2/Siglece/Fcgr1/Itga2	6
GO:0006024	glycosaminoglycan biosynthetic process	9/1595	40/23174	0.00131975	0.0102254	0.00724313	Smpd3/Angpt1/Chpf/B4galt7/Tgfb1/Pdgfb/Xylt1/Has2/Il1b	9
GO:0050803	regulation of synapse structure or activity	33/1595	275/23174	0.00132551	0.0102513	0.00726149	Slitrk4/Srcin1/Cdkl5/Rims3/Ppp1r9a/Lrp4/Ptprf/Egln1/Pten/Mfn1/Opa1/Chmp4b/Arf4/Ywhaz/Sema4d/Nlgn2/Tubb5/Homer1/Cfl1/Fzd1/Sema3f/Picalm/Fcgr2b/Etv5/Tpbg/Tuba1a/Amigo3/Nptxr/Tnf/Bdnf/Srgn/Nptx1/Slc7a11	33
GO:0120193	tight junction organization	10/1595	48/23174	0.00136041	0.0104642	0.0074123	Pof1b/Mpp7/Mpp5/Cdh1/Srf/Gja1/Epha2/Nphp4/Tnf/Snai1	10
GO:0098656	anion transmembrane transport	24/1595	180/23174	0.00140933	0.010821	0.00766501	Slc7a10/Per2/Mpc2/Slc12a2/Slc26a2/Tcaf1/Acsl5/Slc35b1/Slc7a7/Slc20a2/Slc12a4/Abcc1/Ptafr/Slc19a1/Slc7a5/Slc7a1/Myc/Emb/Slc7a8/Thbs1/Slc38a1/Tnf/Slc7a11/Slc16a3	24
GO:0043112	receptor metabolic process	26/1595	201/23174	0.00142755	0.010951	0.00775708	Adipoq/Ehd3/Edn1/Pparg/Angpt1/Cd36/Fut8/Ankrd13d/Ophn1/Gprasp1/Pik3r4/Ldlrap1/Arrb2/Ece1/Picalm/Tgfb1/Adm/Hif1a/Lgmn/Fcer1g/Itgb2/Anxa2/Nrg1/Tnf/Sele/Cxcr2	26
GO:1905330	regulation of morphogenesis of an epithelium	17/1595	111/23174	0.00151334	0.0114645	0.00812086	Cited1/Lgr4/Sfrp1/Pten/Lrp6/Phb2/Cdh1/Rac1/Sox9/Fzd1/Tgfb1/Etv5/Pdgfa/Tacstd2/Lif/Tnf/Celsr3	17
GO:0051893	regulation of focal adhesion assembly	11/1595	57/23174	0.00154533	0.011686	0.00827778	Enpp2/Limch1/Pten/Rac1/Dlc1/Cfl1/Sdc4/Lrp1/Coro1c/S100a10/Fam107a	11
GO:0140014	mitotic nuclear division	31/1595	256/23174	0.00157784	0.0119107	0.00843694	Smpd3/Fgfr2/Edn1/Klhl22/Cdk5rap2/Cdkn1b/Chmp4c/Atrx/Phip/Tnks/Tom1l1/Nipbl/Chmp4b/Phb2/Bub3/Ube2s/Ranbp1/Tgfa/Rrs1/Rcc1/Ran/Nek6/Tgfb1/Cdt1/Igf1r/Eps8/Pdgfb/Sphk1/Tnf/Ereg/Il1b	31
GO:1905521	regulation of macrophage migration	9/1595	41/23174	0.00158911	0.0119358	0.00845469	Mif/Trpv4/Cmklr1/Emilin1/Cd200r1/Thbs1/Csf1/C5ar1/Ccl2	9
GO:1905477	positive regulation of protein localization to membrane	16/1595	102/23174	0.00159258	0.0119374	0.0084558	Cnst/Cacnb3/Lrp4/Tcaf1/Sptbn1/Arpc2/Nlgn2/Rhog/Tgfb1/Lrp1/Pmaip1/Epha2/Nkd2/Lgals3/Tnf/Ccl2	16
GO:0061900	glial cell activation	10/1595	49/23174	0.00160543	0.0119704	0.0084792	Pparg/Tlr3/Lrp1/Ldlr/Sphk1/Tnf/C5ar1/Fpr2/Mmp8/Il1b	10
GO:0046165	alcohol biosynthetic process	20/1595	141/23174	0.00161079	0.0119999	0.00850011	Plcl1/Hmgcs2/Cyp27a1/Prkaa2/Ces1d/Plce1/Ephx1/Vdr/Asah2/Sec14l2/Fdft1/Plcg1/Hmgcr/Ptafr/Adcyap1r1/Cd244a/Sphk1/Tnf/Plek/Il1b	20
GO:0071826	ribonucleoprotein complex subunit organization	29/1595	235/23174	0.00164584	0.0122396	0.00866986	Prkaa2/Eif4b/Dync1h1/Ddx39b/Clns1a/Snrpb/Eif2s2/Rps2/Rsl24d1/Sf3a2/Mrpl20/Prmt5/Snrpd2/Ruvbl1/G3bp1/Snrpd1/Bop1/Ddx28/Nip7/Eif6/Polr2d/Naf1/Mrto4/Nop2/Rpf2/Rrs1/Nle1/Ppan/Noct	29
GO:0032922	circadian regulation of gene expression	12/1595	66/23174	0.00165273	0.0122481	0.00867589	Per3/Lgr4/Cry2/Per2/Rorc/Ncor1/Prmt5/Atf4/Mybbp1a/Cavin3/Relb/Noct	12
GO:0010921	regulation of phosphatase activity	18/1595	122/23174	0.00172332	0.0127048	0.00899943	Chp2/Cry2/Cnst/Cmya5/Ppp1r26/Dlg3/Sfi1/Marf1/Sema4d/Gnai2/Rrp1b/Spred1/Ppp1r15a/Ripk3/Itga2/Tnf/Vcan/Plek	18
GO:1903798	regulation of production of miRNAs involved in gene silencing by miRNA	6/1595	20/23174	0.0017621	0.0129459	0.00917019	Ncor1/Ddx5/Map2k1/Trp53/Tgfb1/Zc3h12a	6
GO:0043255	regulation of carbohydrate biosynthetic process	16/1595	103/23174	0.00176749	0.0129631	0.00918241	Smpd3/Adipoq/Nr3c1/Dyrk2/Epm2aip1/Foxk1/Kat2a/Tgfb1/Ptafr/Pdgfb/Adcyap1r1/Hif1a/Cd244a/Has2/Plek/Il6	16
GO:1903510	mucopolysaccharide metabolic process	11/1595	58/23174	0.00179042	0.0130862	0.00926956	Smpd3/Chst1/Angpt1/Chpf/Tgfb1/Pdgfb/Itih4/Xylt1/Has2/Cd44/Il1b	11
GO:0042362	fat-soluble vitamin biosynthetic process	5/1595	14/23174	0.00181637	0.0131741	0.00933183	Cyp27a1/Vdr/Tnf/Snai1/Il1b	5
GO:0050867	positive regulation of cell activation	49/1595	463/23174	0.00182544	0.0132174	0.00936248	Prkcq/Il6ra/Shld2/Dock8/Vtcn1/Gpam/Ephb4/Cbfb/Mif/Crlf2/Shb/Myd88/Nod2/Tgfb1/Ptafr/Anxa1/Pdgfb/Hes1/Ccn2/Ada/Lgals1/Myb/Dusp10/Fcer1g/Itgb2/Nfkbid/Thbs1/Cd244a/Cd177/Il4ra/Bst1/Pdpn/Selp/Cd300lb/Adora2b/Cd209e/Itgam/Fgr/Plek/Il23a/Cd80/Adam8/Nlrp3/Ccl2/Il6/Mmp8/Nr4a3/Il1b/Clec4d	49
GO:0051384	response to glucocorticoid	14/1595	85/23174	0.00190213	0.0136681	0.00968174	Crebrf/Nr3c1/Map2k1/Eif4e/Zfp36l1/Ddit4/Tgfb1/Anxa1/Sgk1/Zfp36/Tnf/Fam107a/Il6/Il1rn	14
GO:0009612	response to mechanical stimulus	23/1595	174/23174	0.00196359	0.0140859	0.00997769	Kit/Atp1a2/Cd36/Pde2a/Cacnb3/Slc12a2/P2rx7/Arhgdia/Bag3/Rac1/Sox9/Nos3/Cradd/Serpine2/Nfkbia/Myc/Junb/Fos/Thbs1/Itga2/Tnf/Ankrd1/Cxcr4	23
GO:0016311	dephosphorylation	40/1595	361/23174	0.00202301	0.0144878	0.0102624	Chp2/Ephx2/Cry2/Inpp4b/Cnst/Cmya5/Ppp1r26/Dlg3/Sfi1/Ppp2r3a/Ptpn14/Marf1/Rprd1a/Ptprf/Ptpn4/Pten/Ppm1g/Sema4d/Ptpn23/Gnai2/Plpp5/Ptpn12/Dlc1/Rrp1b/Plpp1/Ptprg/Tgfb1/Spred1/Ppp1r15a/Ripk3/Ubash3b/Dusp5/Dusp4/Dusp10/Dusp6/Itga2/Tnf/Dusp1/Vcan/Plek	40
GO:0071456	cellular response to hypoxia	15/1595	95/23174	0.00205677	0.0147048	0.0104161	Kcnk2/Vldlr/Pten/Stub1/Map2k1/Trp53/P4hb/Zfp36l1/Vasn/Hyou1/Hif1a/Ddah1/Myc/Plk3/Adam8	15
GO:0001836	release of cytochrome c from mitochondria	11/1595	59/23174	0.00206627	0.0147603	0.0104554	Bmf/Opa1/Lmna/Trp53/Ppif/Arrb2/Sod2/Pmaip1/Sfn/Mmp9/Plaur	11
GO:0002246	wound healing involved in inflammatory response	4/1595	9/23174	0.00212721	0.0150441	0.0106565	Hmox1/Hif1a/Timp1/Cd44	4
GO:0008354	germ cell migration	4/1595	9/23174	0.00212721	0.0150441	0.0106565	Kit/Tgfb1/Foxc1/Cxcr4	4
GO:0021891	olfactory bulb interneuron development	4/1595	9/23174	0.00212721	0.0150441	0.0106565	Robo2/Rac1/Atf5/Slit2	4
GO:1900122	positive regulation of receptor binding	4/1595	9/23174	0.00212721	0.0150441	0.0106565	Plcl1/Anxa2/Mmp9/Bdnf	4
GO:1900125	regulation of hyaluronan biosynthetic process	4/1595	9/23174	0.00212721	0.0150441	0.0106565	Smpd3/Tgfb1/Pdgfb/Has2	4
GO:0120034	positive regulation of plasma membrane bounded cell projection assembly	16/1595	106/23174	0.00239143	0.0165958	0.0117556	Prkcq/Kit/Arhgap35/Ttbk2/P2rx7/Arpc2/Rac1/Sept9/Srf/Pfn1/Cfl1/Dynll1/Eps8/Plek2/Cdc42ep2/Gm14137	16
GO:0051302	regulation of cell division	21/1595	156/23174	0.00241015	0.0167121	0.011838	Fgfr2/Klhl13/Ptch1/Chmp4c/Birc6/Pik3r4/Ybx1/Myo19/Cdk2ap2/Tgfa/Pkp4/Tgfb1/Igf1r/Plk2/Pdgfb/Pdgfa/Myc/Sfn/Plk3/Ereg/Il1b	21
GO:0009743	response to carbohydrate	25/1595	198/23174	0.0024328	0.0168554	0.0119395	Adra2a/Adipoq/Zbtb20/Prkaa2/Pde3b/Mpc2/Rab11fip5/Pfkfb2/Gpam/Tra2b/Rac1/Pim3/Hmgcr/Dynll1/Zfp36l1/Cdt1/Igf1r/Lrp1/Hif1a/Gpr39/Rps6ka2/Icam1/Ncf2/Thbs1/Il1b	25
GO:1905155	positive regulation of membrane invagination	5/1595	15/23174	0.00257124	0.0176281	0.0124868	Pparg/Cd36/Appl2/Fcgr1/Itga2	5
GO:0071398	cellular response to fatty acid	8/1595	36/23174	0.00263574	0.0179546	0.0127181	Lpl/Prkaa2/Adcy6/Ranbp1/Id3/Ldlr/Zc3h12a/Pid1	8
GO:1905209	positive regulation of cardiocyte differentiation	8/1595	36/23174	0.00263574	0.0179546	0.0127181	Edn1/Nr3c1/Ddx39b/Kat2a/Arrb2/Tgfb1/Ccn4/Nrg1	8
GO:0110053	regulation of actin filament organization	30/1595	254/23174	0.00271979	0.0184208	0.0130483	Prkcq/Limch1/Fhod3/Ppp1r9a/Arhgap35/Sptbn1/Arfgef1/Arpc2/Rac1/Arpc1b/Capzb/Vasp/Limk1/Dlc1/Pfn1/Cfl1/Sdc4/Sh3pxd2b/Eps8/Ccn2/Cdc42ep2/S100a10/Icam1/Slit2/Ccl11/Gm14137/Tacstd2/Id1/Plek/Csf3	30
GO:0050805	negative regulation of synaptic transmission	13/1595	79/23174	0.00274215	0.0185312	0.0131266	Tnr/Adipoq/Grik3/Ppp1r9a/Pten/Rap1b/Eif4a3/Gnai2/Srf/Plk2/Bdnf/Ptgs2/Il1b	13
GO:0072659	protein localization to plasma membrane	32/1595	277/23174	0.00284633	0.0191896	0.0135929	Adipoq/Cnst/Ehd3/Ptch1/Cacnb3/Adcy6/Tnik/Tmbim1/Dennd4c/Mpp5/Sptbn1/Lrp6/Ldlrap1/Gorasp2/Cdh1/Rac1/Tmem150a/Actb/Rhog/Picalm/Tgfb1/Lrp1/Rab8b/S100a10/Mrap/Pid1/Fcer1g/Anxa2/Epha2/Nkd2/Lgals3/Tnf	32
GO:0048285	organelle fission	47/1595	450/23174	0.00289276	0.0194862	0.013803	Smpd3/Fgfr2/Edn1/Pde3a/Klhl22/Mlh3/Cdk5rap2/Pex11a/Cdkn1b/Chmp4c/Marf1/Atrx/Phip/Tnks/Tom1l1/Nipbl/Mfn1/Opa1/Chmp4b/Phb2/Slx4/Bub3/Myo19/Ube2s/Acot8/Ranbp1/Tgfa/Rrs1/Rcc1/Ran/Inf2/Nek6/Tgfb1/Cdt1/Igf1r/Eps8/Cks2/Pdgfb/Rps6ka2/Piwil2/Lif/Sphk1/Tnf/Sycp2/Ereg/Il1b/Osm	47
GO:0002901	mature B cell apoptotic process	3/1595	5/23174	0.00292853	0.0194862	0.013803	Mif/Ada/Cd44	3
GO:0002905	regulation of mature B cell apoptotic process	3/1595	5/23174	0.00292853	0.0194862	0.013803	Mif/Ada/Cd44	3
GO:0002906	negative regulation of mature B cell apoptotic process	3/1595	5/23174	0.00292853	0.0194862	0.013803	Mif/Ada/Cd44	3
GO:0061476	response to anticoagulant	3/1595	5/23174	0.00292853	0.0194862	0.013803	Sfrp1/Sox9/Slit2	3
GO:0090245	axis elongation involved in somitogenesis	3/1595	5/23174	0.00292853	0.0194862	0.013803	Sfrp1/Ppp2r3a/Lrp6	3
GO:0030216	keratinocyte differentiation	19/1595	138/23174	0.00293203	0.0194862	0.013803	Exph5/Ppl/Vdr/Irf6/Map2k1/Zfp36l1/Clic4/Foxc1/Fosl2/Anxa1/Errfi1/Krt17/Zfp36/Sfn/Epha2/Madcam1/Cers3/Reg3g/Ptgs2	19
GO:0036314	response to sterol	6/1595	22/23174	0.00301241	0.0197617	0.0139981	Rorc/Ptch1/Lrp6/Tgfb1/Ccr5/Inhba	6
GO:0101023	vascular endothelial cell proliferation	6/1595	22/23174	0.00301241	0.0197617	0.0139981	Pparg/Plcg1/Akt3/Adam17/Flt1/Ccl12	6
GO:1905562	regulation of vascular endothelial cell proliferation	6/1595	22/23174	0.00301241	0.0197617	0.0139981	Pparg/Plcg1/Akt3/Adam17/Flt1/Ccl12	6
GO:0098742	cell-cell adhesion via plasma-membrane adhesion molecules	25/1595	202/23174	0.00318503	0.0205615	0.0145647	Dsc3/Robo2/Adipoq/Pik3cb/Mbp/Ptprf/Atp2c1/Ptpn23/Cdh1/Esam/Alcam/Acvr1/Mcam/Sdk2/Pvr/Lgals1/Amigo3/Emb/Itga5/Tnfaip3/Cd177/Selp/Sele/Celsr3/Il1rn	25
GO:0019318	hexose metabolic process	27/1595	224/23174	0.00325004	0.0209335	0.0148282	Chst1/Adipoq/Igfbp5/Pgm2l1/Per2/Rorc/Sord/Ganc/Nr3c1/Dyrk2/Pfkfb2/Hectd4/Epm2aip1/Foxk1/Pofut2/Midn/Trp53/Atf4/Adpgk/Kat2a/H6pd/C1qtnf1/Hif1a/Myc/Fabp5/Tnf/Il6	27
GO:0051775	response to redox state	4/1595	10/23174	0.00335297	0.0214022	0.0151602	Smpd3/Selenos/Vasn/Slc7a11	4
GO:0140052	cellular response to oxidised low-density lipoprotein particle stimulus	4/1595	10/23174	0.00335297	0.0214022	0.0151602	Smpd3/Cd36/Myd88/Cd68	4
GO:2000303	regulation of ceramide biosynthetic process	4/1595	10/23174	0.00335297	0.0214022	0.0151602	Smpd3/Samd8/Sphk1/Ccn1	4
GO:0051852	disruption by host of symbiont cells	5/1595	16/23174	0.00352994	0.0221958	0.0157224	Pf4/Cxcl1/Cxcl5/Trem1/Trem3	5
GO:0051873	killing by host of symbiont cells	5/1595	16/23174	0.00352994	0.0221958	0.0157224	Pf4/Cxcl1/Cxcl5/Trem1/Trem3	5
GO:2000647	negative regulation of stem cell proliferation	5/1595	16/23174	0.00352994	0.0221958	0.0157224	Trp53/Tgfb1/Kctd11/Fermt1/Bdnf	5
GO:0051291	protein heterooligomerization	21/1595	161/23174	0.00353009	0.0221958	0.0157224	Kcnc2/Adipoq/Prkaa2/Aldoc/Trps1/Lrp4/Ilk/Map2k1/Farsa/Mat2a/Sept9/Rcc1/C1qtnf1/Pdss1/Birc3/Igf1r/Rrm2/Ripk3/S100a10/C1qtnf6/Anxa2	21
GO:0044262	cellular carbohydrate metabolic process	32/1595	281/23174	0.00355	0.0222758	0.015779	Abcg2/Adipoq/Igfbp5/Inpp4b/Per2/Rorc/Sord/Pygb/Slc5a3/Ugp2/Nr3c1/Dyrk2/Pfkfb2/Epm2aip1/Pten/Foxk1/Pgam1/Midn/Trp53/Kat2a/Dysf/C1qtnf1/Ddit4/Ptafr/Adcyap1r1/Ier3/Hif1a/Cd244a/B4galt5/Has2/Plek/Il6	32
GO:0046683	response to organophosphorus	14/1595	91/23174	0.00364286	0.0227079	0.0160851	Cited1/Kcnq1/Adipoq/Igfbp5/Itpr2/Pde3a/Itpr1/Pde2a/P2rx7/Rap1b/Mat2a/Zfp36l1/Junb/Il1b	14
GO:0060147	regulation of posttranscriptional gene silencing	9/1595	46/23174	0.00366642	0.0227714	0.01613	Pparg/Ncor1/Tnrc6c/Ddx5/Map2k1/Trp53/Tgfb1/Zc3h12a/Zfp36	9
GO:0060966	regulation of gene silencing by RNA	9/1595	46/23174	0.00366642	0.0227714	0.01613	Pparg/Ncor1/Tnrc6c/Ddx5/Map2k1/Trp53/Tgfb1/Zc3h12a/Zfp36	9
GO:0046717	acid secretion	17/1595	121/23174	0.00384049	0.0235146	0.0166565	Pla2g2d/Cacnb4/Kcnq1/Edn1/Tnfrsf11a/Nr3c1/Pnpla8/P2rx7/Mif/Anxa1/Abcc4/Gpr39/Myc/Bdnf/Cyp4f18/Il1b/Il1rn	17
GO:0009266	response to temperature stimulus	21/1595	163/23174	0.00408597	0.0248515	0.0176035	Mill2/Hsf4/Ucp3/Slc27a1/Appl2/Stub1/Bag3/Polr2d/Arrb2/Trpv4/Metrnl/Hmox1/Pde4b/Trpm2/Plac8/Il1r1/Xylt1/Dio2/Cxcr4/Ccl2/Osm	21
GO:0120163	negative regulation of cold-induced thermogenesis	9/1595	47/23174	0.0042632	0.0257821	0.0182627	Plcl1/Adipoq/Lgr4/Cidea/Pgam5/Atf4/Adam17/Adamts5/Id1	9
GO:0070266	necroptotic process	7/1595	31/23174	0.00438837	0.0263519	0.0186663	Tlr3/Pgam5/Trp53/Ppif/Birc3/Ripk3/Tnf	7
GO:1905314	semi-lunar valve development	7/1595	31/23174	0.00438837	0.0263519	0.0186663	Robo2/Sox9/Nos3/Tgfb1/Slit2/Emilin1/Tnfrsf1b	7
GO:0034976	response to endoplasmic reticulum stress	27/1595	229/23174	0.00440249	0.026418	0.0187131	Itpr1/Crebrf/Fbxo44/Opa1/Stub1/Sgta/Erp29/Gorasp2/Creb3l1/Selenos/Trp53/Atf4/P4hb/Syvn1/Sec61b/Pdia4/Cebpb/Manf/Trib3/Fcgr2b/Casp4/Ppp1r15a/Hyou1/Nrros/Sdf2l1/Pmaip1/Thbs1	27
GO:0044282	small molecule catabolic process	34/1595	308/23174	0.00444257	0.0266023	0.0188437	Mat1a/Ces1f/Cyp27a1/Adipoq/Inpp4b/Ces1d/Ehhadh/Sord/Dbi/Ivd/Pcyox1/Ddo/Aldh6a1/Pfkfb2/Pten/Foxk1/Acsl5/Acot8/Trp53/Tha1/Nos3/Ppat/Hsd3b7/Tgfb1/Ada/Ddah1/Upp1/Arg2/Hal/Npl/Cd44/Crabp1/Cyp4f18/Hdc	34
GO:0033627	cell adhesion mediated by integrin	11/1595	65/23174	0.00453143	0.0269826	0.0191131	Itgb8/Adam17/Ada/Icam1/Fermt1/Itga5/Itgb2/Epha2/Cyp1b1/Itga2/Serpine1	11
GO:0043244	regulation of protein complex disassembly	16/1595	113/23174	0.00458016	0.0271106	0.0192037	Per2/Rubcn/Ttbk2/Fyco1/Sptbn1/Arpc2/Capzb/Cfl1/Eif5a/Dysf/Trpv4/Igf1r/Eps8/Map1b/Tnf/Plek	16
GO:1905331	negative regulation of morphogenesis of an epithelium	5/1595	17/23174	0.00472043	0.0271106	0.0192037	Cited1/Pten/Lrp6/Tacstd2/Tnf	5
GO:0034103	regulation of tissue remodeling	13/1595	84/23174	0.00473151	0.0271106	0.0192037	Inpp4b/Tnfrsf11a/Sfrp1/Vdr/Tmbim1/P2rx7/Lrp6/Trp53/Ubash3b/Gja1/Tnfrsf11b/Adam8/Il6	13
GO:0002266	follicular dendritic cell activation	2/1595	2/23174	0.00473441	0.0271106	0.0192037	Nfkb2/Bcl3	2
GO:0002268	follicular dendritic cell differentiation	2/1595	2/23174	0.00473441	0.0271106	0.0192037	Nfkb2/Bcl3	2
GO:0007538	primary sex determination	2/1595	2/23174	0.00473441	0.0271106	0.0192037	Map3k4/Sox9	2
GO:0007542	primary sex determination, germ-line	2/1595	2/23174	0.00473441	0.0271106	0.0192037	Map3k4/Sox9	2
GO:0019100	male germ-line sex determination	2/1595	2/23174	0.00473441	0.0271106	0.0192037	Map3k4/Sox9	2
GO:0021997	neural plate axis specification	2/1595	2/23174	0.00473441	0.0271106	0.0192037	Ptch1/C2cd3	2
GO:0034775	glutathione transmembrane transport	2/1595	2/23174	0.00473441	0.0271106	0.0192037	Abcc1/Slc7a11	2
GO:0035443	tripeptide transmembrane transport	2/1595	2/23174	0.00473441	0.0271106	0.0192037	Abcc1/Slc7a11	2
GO:0045977	positive regulation of mitotic cell cycle, embryonic	2/1595	2/23174	0.00473441	0.0271106	0.0192037	Pdgfb/Hes1	2
GO:0071163	DNA replication preinitiation complex assembly	2/1595	2/23174	0.00473441	0.0271106	0.0192037	Cdt1/Cdc45	2
GO:0099403	maintenance of mitotic sister chromatid cohesion, telomeric	2/1595	2/23174	0.00473441	0.0271106	0.0192037	Atrx/Tnks	2
GO:0099404	mitotic sister chromatid cohesion, telomeric	2/1595	2/23174	0.00473441	0.0271106	0.0192037	Atrx/Tnks	2
GO:1900241	positive regulation of phenotypic switching	2/1595	2/23174	0.00473441	0.0271106	0.0192037	Pdgfb/Sod2	2
GO:1901344	response to leptomycin B	2/1595	2/23174	0.00473441	0.0271106	0.0192037	Ranbp1/Id3	2
GO:1904907	regulation of maintenance of mitotic sister chromatid cohesion, telomeric	2/1595	2/23174	0.00473441	0.0271106	0.0192037	Atrx/Tnks	2
GO:1904908	negative regulation of maintenance of mitotic sister chromatid cohesion, telomeric	2/1595	2/23174	0.00473441	0.0271106	0.0192037	Atrx/Tnks	2
GO:1905167	positive regulation of lysosomal protein catabolic process	2/1595	2/23174	0.00473441	0.0271106	0.0192037	Lrp1/Ldlr	2
GO:1905371	ceramide phosphoethanolamine metabolic process	2/1595	2/23174	0.00473441	0.0271106	0.0192037	Samd8/Sgms2	2
GO:1905373	ceramide phosphoethanolamine biosynthetic process	2/1595	2/23174	0.00473441	0.0271106	0.0192037	Samd8/Sgms2	2
GO:1905581	positive regulation of low-density lipoprotein particle clearance	2/1595	2/23174	0.00473441	0.0271106	0.0192037	Ldlrap1/Anxa2	2
GO:1905602	positive regulation of receptor-mediated endocytosis involved in cholesterol transport	2/1595	2/23174	0.00473441	0.0271106	0.0192037	Ldlrap1/Anxa2	2
GO:2000814	positive regulation of barbed-end actin filament capping	2/1595	2/23174	0.00473441	0.0271106	0.0192037	Arpc2/Cfl1	2
GO:0034115	negative regulation of heterotypic cell-cell adhesion	4/1595	11/23174	0.00498379	0.0280987	0.0199037	Adipoq/Mbp/Tnfaip3/Il1rn	4
GO:0070587	regulation of cell-cell adhesion involved in gastrulation	4/1595	11/23174	0.00498379	0.0280987	0.0199037	Adipoq/Mbp/Tnfaip3/Il1rn	4
GO:0150079	negative regulation of neuroinflammatory response	4/1595	11/23174	0.00498379	0.0280987	0.0199037	Pparg/Ldlr/Cd200r1/Tnfrsf1b	4
GO:1905038	regulation of membrane lipid metabolic process	4/1595	11/23174	0.00498379	0.0280987	0.0199037	Smpd3/Samd8/Sphk1/Ccn1	4
GO:0002440	production of molecular mediator of immune response	37/1595	345/23174	0.00498551	0.0280987	0.0199037	Ccr6/Kit/Tril/Angpt1/Cd36/Gprc5b/Shld2/Trim6/Samhd1/Tlr3/Mif/Crlf2/Traf3ip2/Ddx21/Nod2/Tgfb1/Ercc1/Fcgr2b/Hmox1/Sema7a/Il1r1/Fcer1g/Fgl2/Cd244a/Tnfrsf1b/Tnfaip3/Il4ra/Hpx/Tnf/Slc11a1/Il18rap/Nlrp3/Il6/Nr4a3/Il1b/Trem1/Trem3	37
GO:1903573	negative regulation of response to endoplasmic reticulum stress	8/1595	40/23174	0.00524623	0.0293699	0.0208041	Crebrf/Opa1/Sgta/Creb3l1/Selenos/Syvn1/Ppp1r15a/Hyou1	8
GO:0050890	cognition	35/1595	323/23174	0.00527548	0.0294749	0.0208785	Tnr/Chrm1/Kit/Prkar2b/Atp1a2/Dbi/Atxn1/Shroom4/Nipbl/Pten/Pja2/Arf4/Srf/Hmgcr/Kat2a/Picalm/Plk2/B4galt2/Rin1/Hif1a/Ldlr/Lgmn/Pde1b/Sgk1/Itga5/Bdnf/Chl1/Fam107a/C5ar1/Cyp7b1/Ngf/Slc7a11/Ptgs2/Il1b/Il1rn	35
GO:0003100	regulation of systemic arterial blood pressure by endothelin	3/1595	6/23174	0.00555743	0.030471	0.0215841	Edn1/Nos3/Ece1	3
GO:0010757	negative regulation of plasminogen activation	3/1595	6/23174	0.00555743	0.030471	0.0215841	Serpine2/Thbs1/Serpine1	3
GO:0034638	phosphatidylcholine catabolic process	3/1595	6/23174	0.00555743	0.030471	0.0215841	Enpp2/Pnpla8/Ldlr	3
GO:1905563	negative regulation of vascular endothelial cell proliferation	3/1595	6/23174	0.00555743	0.030471	0.0215841	Pparg/Flt1/Ccl12	3
GO:0042445	hormone metabolic process	25/1595	211/23174	0.00561626	0.030754	0.0217845	Duoxa1/Cyp27a1/Pcsk6/Dhrs3/Retsat/Vdr/Ddo/Nr3c1/Stub1/Ece1/Rdh10/Cpe/Igf1r/Adm/Hif1a/Ugt1a7c/Slco4a1/Gcnt4/Cyp1b1/Dio2/Tnf/Dhrs9/Rdh12/Crabp1/Il1b	25
GO:0055072	iron ion homeostasis	13/1595	86/23174	0.00579646	0.0315903	0.0223769	Hephl1/Neo1/Egln1/Ccdc115/Picalm/Sod2/Hmox1/Hif1a/Fbxl5/Steap4/Myc/Hpx/Slc11a1	13
GO:0035264	multicellular organism growth	25/1595	212/23174	0.00596268	0.0322317	0.0228312	Smpd3/Gdf5/Ptch1/Atrn/Slc12a2/Atrx/Ncor1/Gpam/Nipbl/Wwtr1/Taf10/Ppib/Trp53/Atf5/Kat2a/Zfp36l1/Clic4/Sh3pxd2b/Ercc1/Slc25a25/Lgmn/Klf2/Plac8/Csf1/Gdf15	25
GO:0010165	response to X-ray	6/1595	25/23174	0.00598831	0.0322317	0.0228312	Sfrp1/Nipbl/Trp53/Ercc1/Anxa1/Pmaip1	6
GO:0045332	phospholipid translocation	6/1595	25/23174	0.00598831	0.0322317	0.0228312	Atp10b/P2rx7/Abcc1/Atp8b1/Atp8b4/Atp8b5	6
GO:0051767	nitric-oxide synthase biosynthetic process	6/1595	25/23174	0.00598831	0.0322317	0.0228312	Edn1/Map2k4/Selenos/Nod2/Akap12/Ccl2	6
GO:0051769	regulation of nitric-oxide synthase biosynthetic process	6/1595	25/23174	0.00598831	0.0322317	0.0228312	Edn1/Map2k4/Selenos/Nod2/Akap12/Ccl2	6
GO:0002269	leukocyte activation involved in inflammatory response	8/1595	41/23174	0.00613281	0.0327814	0.0232207	Pparg/Tlr3/Ldlr/Sphk1/Tnf/C5ar1/Fpr2/Mmp8	8
GO:0006775	fat-soluble vitamin metabolic process	7/1595	33/23174	0.00632188	0.0334769	0.0237133	Cyp27a1/Vdr/Tnf/Snai1/Crabp1/Cyp4f18/Il1b	7
GO:0055067	monovalent inorganic cation homeostasis	19/1595	148/23174	0.00634427	0.0335745	0.0237824	Atp12a/Rogdi/Chp2/Nr3c2/Edn1/Atp1a2/Slc12a2/Mafg/Gnai2/Ccdc115/Trp53/Clic4/Slc12a4/Gpr39/Rab20/Slc4a11/Car4/Sgk1/Slc11a1	19
GO:0022404	molting cycle process	15/1595	107/23174	0.00650877	0.0343512	0.0243326	Lgr4/Igfbp5/Fgfr2/Dbi/Trps1/Prss8/Lrp4/Sox9/Pdgfa/Fermt1/Krt17/Tnfrsf19/Tnf/Snai1/Inhba	15
GO:0022405	hair cycle process	15/1595	107/23174	0.00650877	0.0343512	0.0243326	Lgr4/Igfbp5/Fgfr2/Dbi/Trps1/Prss8/Lrp4/Sox9/Pdgfa/Fermt1/Krt17/Tnfrsf19/Tnf/Snai1/Inhba	15
GO:0014745	negative regulation of muscle adaptation	4/1595	12/23174	0.00707214	0.0370808	0.0262661	Igfbp5/Lmna/Nos3/Errfi1	4
GO:0070586	cell-cell adhesion involved in gastrulation	4/1595	12/23174	0.00707214	0.0370808	0.0262661	Adipoq/Mbp/Tnfaip3/Il1rn	4
GO:0010518	positive regulation of phospholipase activity	8/1595	42/23174	0.00712857	0.0371707	0.0263298	Fgfr2/Arf4/Dlc1/Flt1/Ptafr/Adcyap1r1/Ccn1/Sele	8
GO:0050691	regulation of defense response to virus by host	8/1595	42/23174	0.00712857	0.0371707	0.0263298	Mill2/Trim6/Traf3ip2/Tmem173/Zc3h12a/Treml4/Il23a/Il1b	8
GO:1905523	positive regulation of macrophage migration	6/1595	26/23174	0.0073394	0.0379909	0.0269107	Trpv4/Cmklr1/Thbs1/Csf1/C5ar1/Ccl2	6
GO:0016485	protein processing	27/1595	239/23174	0.00774823	0.0397208	0.0281361	Pcsk6/Cd55/Ptch1/Ift172/C2cd3/P2rx7/Glg1/Cdh1/Ruvbl1/Tbc1d10a/Spcs3/Ece1/Cpe/Birc3/Serpine2/Lgmn/Rps6ka2/Asprv1/Myc/Anxa2/Thbs1/Cpxm1/Nkd2/Serpine1/Srgn/Il1b/Il1r2	27
GO:0035728	response to hepatocyte growth factor	5/1595	19/23174	0.00790652	0.0403379	0.0285733	Gab1/Appl2/Bcar1/Lgmn/Il6	5
GO:0032409	regulation of transporter activity	29/1595	263/23174	0.00825934	0.0418621	0.0296529	Kcnc2/Cacnb4/Kcnq1/Cacnb1/Ehd3/Dapk1/Atp1a2/Klhl24/Cacnb3/Stoml1/Plcg1/Tcaf1/Pten/Phb2/Nlgn2/Homer1/Cbarp/Cfl1/Dysf/Ppif/Actb/Ptafr/Rem2/Pde4b/Gja1/Alox5/Fxyd5/Mmp9/Gpr35	29
GO:0014823	response to activity	7/1595	35/23174	0.00882687	0.0445124	0.0315303	Cry2/Prkaa2/Gpam/Sod2/Metrnl/Slc25a25/Hif1a	7
GO:0045730	respiratory burst	6/1595	27/23174	0.00889734	0.0445652	0.0315677	Rac1/Pgam1/Ncf2/Dusp10/Ncf4/Slc11a1	6
GO:0034379	very-low-density lipoprotein particle assembly	3/1595	7/23174	0.0092298	0.0454288	0.0321794	Ces1d/Soat1/Soat2	3
GO:1905461	positive regulation of vascular associated smooth muscle cell apoptotic process	3/1595	7/23174	0.0092298	0.0454288	0.0321794	Pparg/Atf4/Sod2	3
GO:0110020	regulation of actomyosin structure organization	14/1595	101/23174	0.00925269	0.0454889	0.0322219	Prkcq/Prox1/Limch1/Edn1/Ppp1r9a/Rac1/Limk1/Dlc1/Pfn1/Sdc4/Sh3pxd2b/Ccn2/S100a10/Tacstd2	14
GO:0110110	positive regulation of animal organ morphogenesis	14/1595	101/23174	0.00925269	0.0454889	0.0322219	Robo2/Lgr4/Fgfr2/Edn1/Itpr1/Vdr/Sox9/Acvr1/Pim1/Tgfb1/Myc/Tnfaip3/Lif/Csf1	14
GO:0009798	axis specification	13/1595	91/23174	0.0093048	0.0456396	0.0323287	Cited1/Pcsk6/Ptch1/Sfrp1/Bcor/Ift172/C2cd3/Lrp6/Mdfi/Srf/Ets2/Nrarp/Stc1	13
GO:0007613	memory	18/1595	143/23174	0.00944949	0.0461897	0.0327183	Atxn1/Pten/Pja2/Srf/Kat2a/Plk2/B4galt2/Rin1/Ldlr/Lgmn/Sgk1/Itga5/Bdnf/Cyp7b1/Ngf/Ptgs2/Il1b/Il1rn	18
GO:0070914	UV-damage excision repair	4/1595	13/23174	0.00966534	0.04655	0.0329736	Hist3h2a/Cul4b/Pold3/Ercc1	4
GO:0097755	positive regulation of blood vessel diameter	11/1595	72/23174	0.00987439	0.0474762	0.0336297	Adra2a/Gucy1a1/Arhgap42/Ptafr/Adm/Sod2/Hif1a/Gja1/Dusp5/Tnf/Adora2b	11
GO:0001946	lymphangiogenesis	5/1595	20/23174	0.00995466	0.0476737	0.0337696	Prox1/Ptpn14/Foxc1/Epha2/Pdpn	5

## Sheet: TOP50 BP
leukocyte migration	cytokine-mediated signaling pathway	regulation of inflammatory response	ERK1 and ERK2 cascade	fat cell differentiation	epithelial cell proliferation	regulation of lipid metabolic process	lipid localization	gland morphogenesis	response to wounding	acute inflammatory response
Ada	Ackr1	Acod1	Adam17	Adgrf5	Adam17	Acsl5	Abca6	Ccl11	Adam17	Acvr1
Adam17	Acsl1	Ada	Adipoq	Adig	Adora2b	Adgrf5	Abca8a	Cd44	Adm	Adam8
Adam8	Adam17	Adam8	Akap12	Adipoq	Akt3	Adipoq	Abca8b	Cdh1	Adra2a	Adra2a
Anxa1	Adipoq	Adipoq	Angpt1	Aldh6a1	C5ar1	Adora2b	Abca9	Cebpb	Anxa1	Alox5
Artn	Angpt1	Adora2b	Arrb2	Arl4a	Ccl11	Adra2a	Abcc1	Csf1	Anxa2	Alox5ap
Bst1	Appl2	Alox5ap	C5ar1	Atf5	Ccl12	Anxa1	Abcc4	Cyp7b1	Arfgef1	C2cd4b
C5ar1	Cactin	Anxa1	Cavin3	Bbs9	Ccl2	Appl2	Acsl1	Epha2	Arhgap35	Ccr5
Ccl11	Casp4	Appl2	Ccl11	Ccn4	Cdh1	Ccn1	Acsl5	Etv4	C1qtnf1	Cd163
Ccl12	Ccl11	Bst1	Ccl12	Cebpb	Cdkn1b	Cd36	Adipoq	Etv5	Ccl2	Cd55
Ccl2	Ccl12	C2cd4b	Ccl2	Cebpd	Cebpb	Cidea	Anxa1	Fgfr2	Ccn1	Cxcl1
Ccl3	Ccl2	C5ar1	Ccl3	Cmklr1	Cyp7b1	Crebl2	Anxa2	Igf1r	Ccn4	Cxcr2
Ccl4	Ccl3	Ccl3	Ccl4	Crebl2	Dusp10	Dbi	Atp10b	Igfbp5	Cd36	F8
Ccl6	Ccl4	Ccn4	Ccl6	Dusp10	Dysf	Eif6	Atp8b1	Il6	Cd44	Fcer1g
Ccl9	Ccl6	Ccr5	Ccl9	Dysf	Ecm1	Ephx2	Atp8b4	Itpr1	Cdkn1b	Fcgr1
Ccr1	Ccl9	Cd200r1	Ccn1	Egr2	Epha2	Fabp5	Atp8b5	Lims2	Cxcr4	Fcgr2b
Ccr6	Ccr1	Cd200r4	Ccn2	Gdf6	Ereg	Fgr	C1qtnf1	Lrp6	Dst	Fcgr3
Cd177	Cd300lf	Cd44	Ccr1	Hes1	Errfi1	Flt1	Cd36	Msn	Dusp10	Icam1
Cd200r1	Cntfr	Cd55	Cd36	Jdp2	Etv4	Fpr2	Cidea	Nfib	Dysf	Il1b
Ch25h	Crebrf	Cebpb	Cd44	Lgals12	Fermt1	Gpam	Cry2	Nr3c1	Entpd1	Il1rn
Cmklr1	Crlf2	Duoxa1	Dstyk	Lpl	Fgfr2	Gpr39	Cyp4f18	Pdgfa	F10	Il6
Csf1	Csf1	Dusp10	Dusp1	Lrp6	Flt1	Hcar2	Dysf	Pdgfb	F8	Itih4
Csf3r	Cxcl1	Fcer1g	Dusp10	Metrnl	Gdf5	Igf1r	Edn1	Phb2	Fcer1g	Mif
Cxcl1	Cxcl2	Fcgr1	Dusp4	Mmp11	Gja1	Il1b	Ehd1	Prox1	Gja1	Nlrp3
Cxcl2	Cxcl3	Fcgr2b	Dusp6	Mrap	Has2	Kit	Hilpda	Ptch1	Hbegf	Orm2
Cxcl3	Cxcl5	Fcgr3	Ece1	Nipbl	Hes1	Ldlr	Ikbke	Sfrp1	Hif1a	Pparg
Cxcl5	Cxcr2	Fndc4	Emilin1	Noct	Hmox1	Lgals12	Il1b	Slc12a2	Hmgcr	Ptgs2
Cxcr2	Cxcr4	Fpr2	Epha2	Nr4a1	Id1	Nod2	Inhba	Slit2	Hmox1	Reg3g
Cyp7b1	Ecm1	Gprc5b	Errfi1	Nr4a2	Ift172	Nr1d2	Ldlr	Sox9	Ifrd1	Saa3
Dapk2	Ereg	Ier3	Fgfr2	Nr4a3	Igfbp5	Nr3c1	Ldlrap1	Tgfa	Igf1r	Selenos
Dock8	Fcer1g	Il17ra	Flt1	Nucb2	Il6	Nr4a3	Lipg	Tgfb1	Il6	Serpina3n
Dusp1	Foxc1	Il1b	Fpr2	Nudt7	Irf6	Nucb2	Lpl	Tnf	Lrp1	Tnf
Dysf	Gab1	Il1r1	Gcnt2	Per2	Itpr1	Pde3b	Lrp1	Tnfaip3	Map2k1	Tnfrsf11a
Ecm1	Gpr35	Il1r2	Glipr2	Pex11a	Kif3a	Pdgfa	Lrp6	Vdr	Map2k4	Trem1
Edn1	Grem2	Il6	Gnai2	Plac8	Kit	Pdgfb	Mfsd2a	Zfp157	Mif
Emilin1	Hpx	Itga2	Hmgcr	Pparg	Lgr4	Pik3ip1	Mif		Mir22hg
Eps8	Ifitm1	Ldlr	Icam1	Ptgs2	Lims2	Pik3r4	Msr1		Neo1
Fcer1g	Ifitm2	Lpl	Il1b	Rnasel	Lrp6	Pik3r5	Ncor1		Ninj1
Fcgr3	Ifitm3	Mefv	Il6	Rorc	Map2k1	Pparg	Nfkbia		Pdgfa
Flt1	Ifitm6	Metrnl	Kit	Sfrp1	Myc	Prkaa2	Nucb2		Pdgfb
Foxj1	Ikbke	Mif	Lif	Sh2b2	Nfib	Prox1	Osbpl6		Pdpn
Fpr2	Il18rap	Mmp8	Lrp1	Sh3pxd2b	Nme1	Ptgs2	P2rx7		Pf4
Gcnt1	Il1b	Myd88	Map2k1	Sod2	Nod2	Rac1	Pla2g2d		Pik3cb
Gpr35	Il1r1	Nfkbia	Mif	Steap4	Nr4a1	Rdh10	Plekha3		Plec
Hsd3b7	Il1r2	Nlrp12	Myc	Taf8	Nr4a3	Rorc	Pnpla8		Plek
Icam1	Il1rn	Nlrp3	Ngf	Tgfb1	Nrarp	Rubcn	Pparg		Ppl
Il17ra	Il6	Nod2	Nlrp12	Tnf	Pdgfb	Samd8	Ptch1		Prkcq
Il1b	Il6ra	Nr1d2	Nod2	Trib3	Phb2	Sec14l2	Relch		Pten
Il1r1	Ilk	Nt5e	Pdgfa	Trpv4	Pik3cb	Slc27a1	Sigmar1		Ptprf
Il1rn	Kit	Osm	Pdgfb	Wnt5b	Plcg1	Smpd3	Slc10a6		Rap2b
Il23a	Krt8	Pde2a	Phb2	Wwtr1	Pparg	Snai1	Slc27a1		Reg3g
Itga2	Myd88	Pparg	Prmt5	Zc3h12a	Prox1	Sphk1	Slco2b1		Rtn4rl2
Itgam	Nfkbia	Ptgs2	Prxl2c	Zfp36	Ptch1	Stub1	Soat1		S100a9
Itgb2	Oas2	S100a8	Pten	Zfp36l1	Pten	Tgfb1	Soat2		Sdc1
Kit	Osm	S100a9	Rap1b		Reg3g	Thrb	Stoml1		Sdc4
Lgals3	Padi2	Selenos	Sema7a		Scn5a	Tnf	Thbs1		Selp
Lgmn	Pdgfb	Sema7a	Sirt3		Sfn	Trib3	Tnf		Serpinb2
Madcam1	Pf4	Serpine1	Sox9		Sfrp1	Ttc39b	Tnfrsf11a		Serpine1
Mcoln2	Plvap	Siglece	Spred1		Sox9	Vdr	Ttc39b		Serpine2
Mif	Pparg	Slit2	Spry2		Tacstd2	Zbtb20	Vldlr		Slc11a1
Mmp9	Ppbp	Socs3	Spry4		Tgfa		Zc3h12a		Slc7a11
Msn	Ptprf	Sphk1	St5		Tgfb1				Sod2
Myd88	Samhd1	Tarm1	Tgfb1		Thbs1				Srf
Nlrp12	Sh2b2	Tlr3	Tnfrsf11a		Tnf				Tgfb1
Nod2	Slc27a1	Tmem173	Tnip1		Tnfaip3				Thbs1
Padi2	Slit2	Tnf	Trpv4		Uhrf1				Timp1
Pde4b	Sphk1	Tnfaip3	Zfp36l1		Vdr				Tnfaip3
Pdgfb	Spi1	Tnfaip6			Wdr77				Tnr
Pf4	Tnf	Tnfrsf11a			Zfp36				Tpsab1
Pla2g7	Tnfrsf11a	Tnfrsf1b			Zfp36l1				Tspan8
Plvap	Trim6	Tnip1							Ubash3b
Ppbp	Trp53	Trpv4							Xylt1
Ptafr		Zc3h12a							Zfp36
Rac1		Zfp36							Zfp36l1
Retnlg
Ripk3
S100a8
S100a9
Sele
Selp
Serpine1
Slc12a2
Slit2
Smpd3
Tgfb1
Thbs1
Tnf
Tnfrsf18
Trem1
Trem3
Trp53
Trpm2
Trpv4
Vav1

## Sheet: Sheet4
regulation of phagocytosis	intrinsic apoptotic signaling pathway	phagocytosis
Adipoq	Aen	Adipoq
Appl2	Atf4	Anxa1
Atg3	Bcl3	Appl2
Ccl2	Casp4	Arhgap12
Cd300lf	Cd44	Atg3
Cd36	Cebpb	Ccl2
Dysf	Creb3l1	Cd300lf
Fcer1g	Cyp1b1	Cd36
Fcgr1	Dapk2	Coro1c
Fcgr2b	Ddit4	Dysf
Fcgr3	Ddx5	Fcer1g
Fgr	Dyrk2	Fcgr1
Fpr2	Epha2	Fcgr2b
Il1b	Erp29	Fcgr3
Itga2	Hif1a	Fgr
Lrp1	Hint1	Fpr2
Lyar	Hmox1	Il1b
Nod2	Hyou1	Itga2
Pparg	Ier3	Itgb2
Pten	Ikbke	Ldlr
Ptx3	Itpr1	Lrp1
Sftpd	Lgals12	Lyar
Siglece	Map2k1	Msr1
Slc11a1	Mapk8ip1	Myd88
Sphk1	Mcl1	Ncf2
Tgfb1	Mif	Ncf4
Tnf	Mmp9	Nod2
	Mybbp1a	P2rx7
	Myc	Pparg
	Opa1	Pten
	P4hb	Ptx3
	Plaur	Rab20
	Pmaip1	Rac1
	Ppif	Sftpd
	Prkra	Siglece
	Ptgs2	Slc11a1
	Ripk3	Sphk1
	Rrm2b	Tgfb1
	Rrp8	Thbs1
	S100a8	Tnf
	S100a9	Treml4
	Selenos	Txndc5
	Sfn	Vav1
	Snai1	Xkr4
	Sod2
	Syvn1
	Tnf
	Tnfrsf1b
	Trib3
	Trp53
