# Supplementary material for: Estrogen exacerbates mammary involution through neutrophil-dependent and -independent mechanism
Source: eLife journal article supplement (doi:10.7554/elife.57274), 2020-07-24
Supplement: supp [file elife-57274-supp-v1.zip › elife_poa_e57274_Figure_3_figure_supplement_1.pdf]

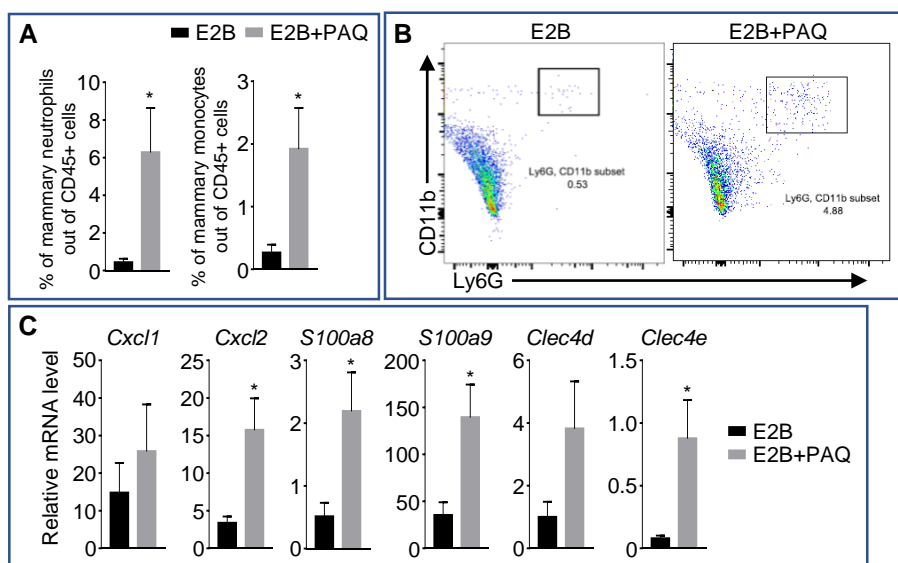

**Figure 3 – Figure Supplement 1. Putative S100A9 inhibitor Paquinimod promotes neutrophil infiltration.** Mice were treated at INV D1 with either E2B or E2B+PAQ for 48h. A, Treatment with E2B and PAQ significantly induces neutrophil and monocyte infiltration into the involuting MG as compared to E2B-treated; Flow cytometry analysis of mammary neutrophils (CD45+ CD11b+ Ly6G+) and monocytes (CD45+ CD11b+ Ly6G<sup>hi</sup>) out of live CD45+ cell population. B, Representative flow cytometry dot plot for the percentage of neutrophils in the MG. C, Treatment with E2B and PAQ increases the expression of some inflammatory genes as compared to E2B-treated; Gene expression of inflammatory genes *Cxcl1*, *Cxcl2*, *S100a8*, *S100a9*, *Clec4d*, and *Clec4e* relative to *Rplp0* by qPCR analysis. E2B n=6, E2B+PAQ n=5. Data represented as mean  $\pm$  SEM.
