# Supplementary material for: Estrogen exacerbates mammary involution through neutrophil-dependent and -independent mechanism
Source: eLife journal article supplement (doi:10.7554/elife.57274), 2020-07-24
Supplement: supp [file elife-57274-supp-v1.zip › elife_poa_e57274_Figure_3_figure_supplement_2.pdf]

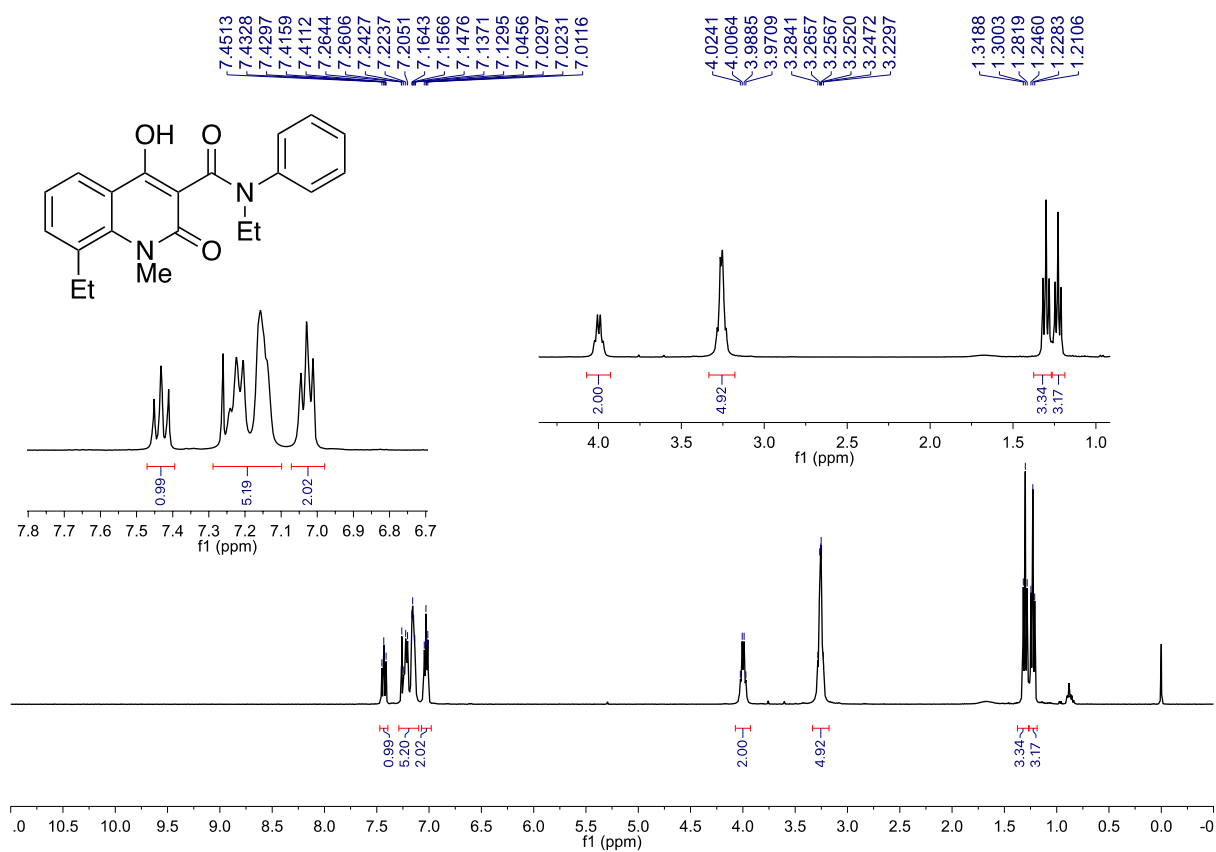

**Figure 3 – Figure Supplement 2. <sup>1</sup>H NMR Spectrum of the synthesized Paquinimod (PAQ):** <sup>1</sup>H NMR (CDCl<sub>3</sub>, 400 MHz) δ 7.43 (1H, dd, *J* = 8.6, 7.4 Hz), 7.29 – 7.10 (5H, m), 7.03 (2H, dd, *J* = 8.1, 5.5 Hz), 4.00 (2H, q, *J* = 7.1 Hz), 3.28 – 3.23 (3H+2H m), 1.30 (3H, t, *J* = 7.4 Hz), 1.23 (3H, t, *J* = 7.1 Hz). <sup>1</sup>H NMR spectrum was recorded on a Bruker Avance 400 spectrometer.
