# Supplementary material for: Estrogen exacerbates mammary involution through neutrophil-dependent and -independent mechanism
Source: eLife journal article supplement (doi:10.7554/elife.57274), 2020-07-24
Supplement: supp [file elife-57274-supp-v1.zip › elife_poa_e57274_Figure_4_figure_supplement_1.pdf]

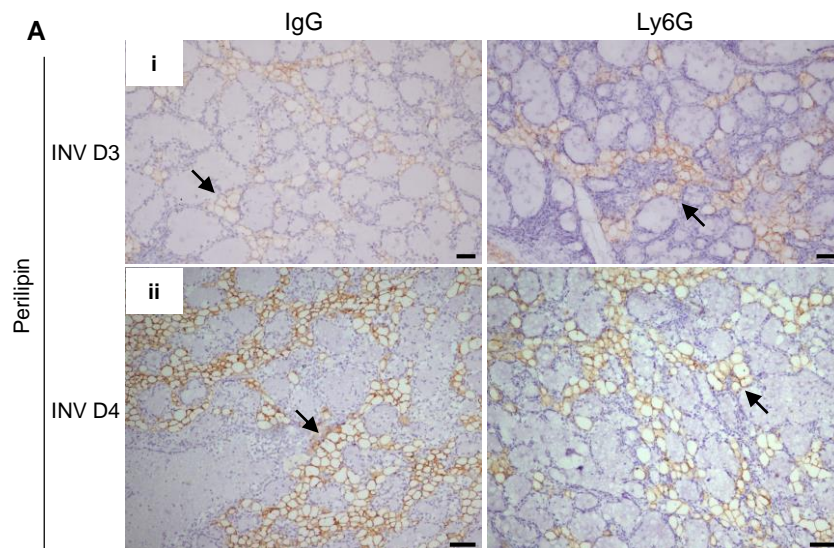

**Figure 4 – Figure Supplement 1. Neutrophil depletion transiently reduces E2B-induced adipocyte repopulation during mammary involution.** Non-OVX mice were treated daily with either anti-Ly6G antibody (Ly6G) or isotype control (IgG) from 24h post-weaning (INV D1). Mammary tissue was collected for analysis at INV D3 and INV D4. A, (i) Perilipin IHC at INV D3; (ii) Perilipin IHC at INV D4; arrows indicate perilipin<sup>+</sup> adipocytes. Scale bars: 50μm.
