# Supplementary material for: Estrogen exacerbates mammary involution through neutrophil-dependent and -independent mechanism
Source: eLife journal article supplement (doi:10.7554/elife.57274), 2020-07-24
Supplement: supp [file elife-57274-supp-v1.zip › elife_poa_e57274_Figure_5_figure_supplement_2.pdf]

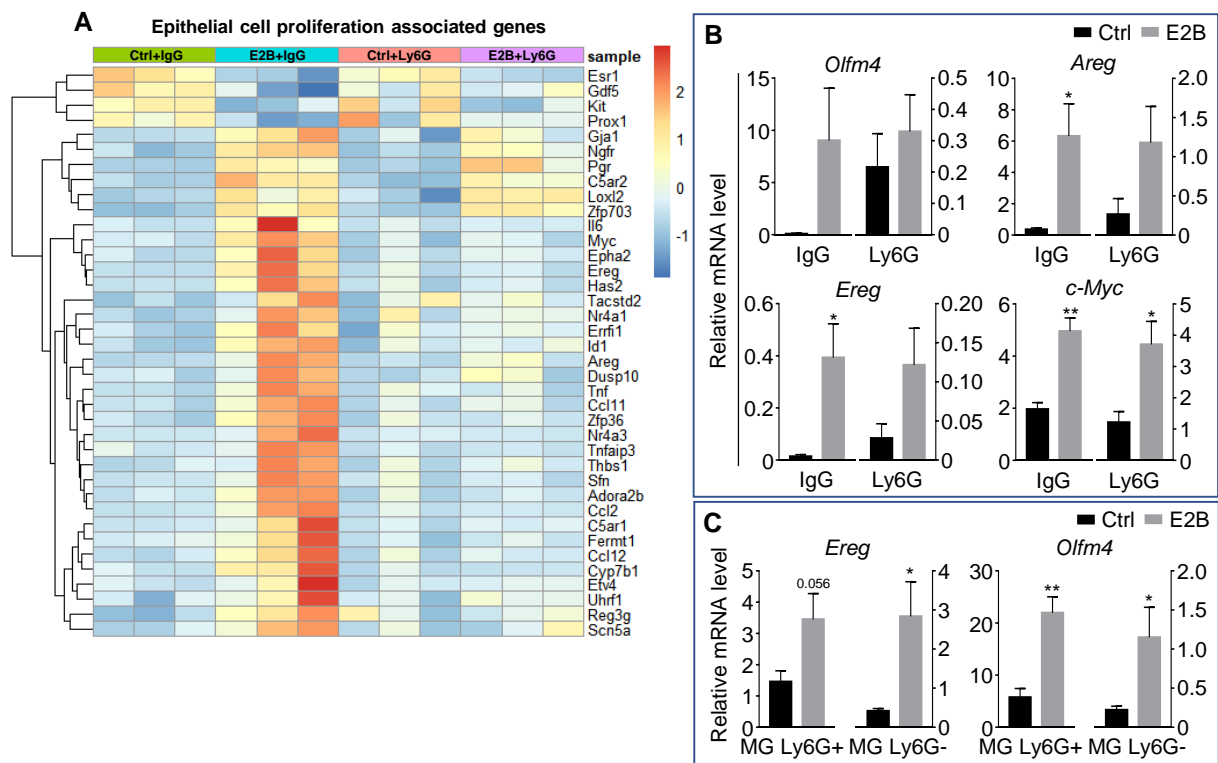

**Figure 5 – Figure Supplement 2. Estrogen-induced genes associated with cell proliferation are regulated in both mammary gland and neutrophil population.** A-B, Mice at INV D1 was treated with anti-Ly6G antibody (Ly6G) or isotype control (IgG). 24h later, they were treated with vehicle control (Ctrl) or E2B for 24h; A, Heatmap representation of genes associated to epithelial cell proliferation identified from the GO over-representation analysis ( $\geq 2$  and  $\leq -2$ -fold) of the DESeq2 analysed RNA-Seq data; B, E2B induces proliferative gene expression independent of neutrophil presence; qPCR validation of estrogen-induced expression of *Areg*, *c-Myc*, *Olfm4*, and *Ereg* relative to *Rplp0* (Ctrl+IgG n=3, Ctrl+Ly6G n=3, E2B+IgG n=3, E2B+Ly6G n=3). C, *Ereg* and *Olfm4* were induced by estrogen in both mammary neutrophil and non-neutrophil population; Mice at INV D2 was treated with Ctrl or E2B for 24h. Gene expression of *Ereg* and *Olfm4* analysed in both Ly6G+ and Ly6G- population by qPCR analysis (Ctrl n=5, E2B n=5). Data represented as mean  $\pm$  SEM.
