# Supplementary material for: Estrogen exacerbates mammary involution through neutrophil-dependent and -independent mechanism
Source: eLife journal article supplement (doi:10.7554/elife.57274), 2020-07-24
Supplement: supp [file elife-57274-supp-v1.zip › elife_poa_e57274_Supplementary_file_1.xlsx]

## Sheet: Primer list
Gene	Forward primer	Reverse primer
Rplp0	GATCGGGTACCCAACTGTTGCC	CAGGGGCAGCAGCCGCAAATGC
Acod1	AGTTTTCTGGCCTCGACCTG	AGAGGGAGGGTGGAATCTCT
Adig	CTCTACCAGGTACCATCTGGG	CTTCCAGGTTCCGGGTCATC
Areg	CACAGCGAGGATGACAAGGA	GAGGATGATGGCAGAGACAAAGA
Bid	CCATGTAGGTGGGCTTCTGTCTAA	CATGGTTTGAGATCAGCCATTCGG
Cebpb	CGCCTTATAAACCTCCCGCT	TGGCCACTTCCATGGGTCTA
Cebpd	AGAACGAGAAGCTGCATCAGC	TTGAAGAACTGCCGGAGGC
Clec4d	CCGAGAGGAGCCACAGCC	TCATGCCAGGTCTGGTTGTCA
Clec4e	TGCTACAGTGAGGCATCAGG	GGTTTTGTGCGAAAAAGGAA
c-Myc	CACCAGCAGCGACTCTGAA	CCCGACTCCGACCTCTTG
Ctsb	TCCTTGATCCTTCTTTCTTGCC	ACAGTGCCACACAGCTTCTTC
Csn2	CATCCTCGCCTGCCTTGTGGC	CCATGAGATTCACCTTCTGAA
Cox2	CCAGCACTTCACCCATCAGTT	ACCCAGGTCCTCGCTTATGA
Cxcl1	ATCCAGAGCTTGAAGGTGTTG	GTCTGTCTTCTTTCTCCGTTACTT
Cxcl2	CCAACCACCAGGCTACAG	GCGTCACACTCAAGCTCTG
Cxcl3	ACCCAGACAGAAGTCATAGCCA	CTTCATCATGGTGAGGGGCT
Cxcl5	GCATTTCTGTTGCTGTTCACGCTG	CCTCCTTCTGGTTTTTCAGTTTAGC
Cxcr2	ATGCCCTCTATTCTGCCAGAT	GTGCTCCGGTTGTATAAGATGAC
Egr2	CTCCCGTATCCGAGTAGC	GATGCCCGCACTCACAAT
Ereg	TGCTTTGTCTAGGTTCCCACC	CGGGGATCGTCTTCCATCTG
Gapdh	TGCACCACCAACTGCTTAG	GAGGCAGGGATGATGTTC
Il1b	CAACCAACAAGTGATATTCTCCATG	GATCCACACTCTCCAGCTGCA
Mirt2	TCAACACTTTCCATAGGT	ATTGTGAGGTCCAGATAG
Mmp19	AGGTGTTCCTGTTTAAGGGCT	CGAAGTTGCTGGTTAAGGCG
Mmp3	TGGCCATCTCTTCCATCCAA	CCCAGAACTGATTTCCTTTAAAAATG
Mmp8	ACCAGTGCTGGAGATATGACA	ACTCCTGGGAACATGCTTGG
Mmp9	CTGCATTTCTTAAGGACGG	AAGTCGAATCTCCAGACACG
Olfm4	CTGCTCCTGGAAGCTGTAGTC	GGAGAGTAATCTCGGCCCCA
S100a8	CGAAAACTTGTTCAGAGAATTGGA	ACTTTTATCACCATCGCAAGGAA
S100a9	GTTGATCTTTGCCTGTCATGAG	AGCCATTCCCTTTAGACTTGG
Timp1	GATATGCCCACAAGTCCCAGAACC	GCACACCCCACAGCCAGCACTAT
Timp2	GGAATGACATCTATGGCAACC	GGCCGTGTAGATAAACTCGAT
Tnfa	TGAACTTCGGGGTGATCGGTC	AGCCTTGTCCCTTGAAGAGAAC
Trem1	GAGCTTGAAGGATGAGGAAGGC	CAGAGTCTGTCACTTGAAGGTCAGTC
Trem3	ATCTGTCGTCAAGGTCACGG	CTGGCTTCCCTTGACACCAT
