# Supplementary material for: Estrogen exacerbates mammary involution through neutrophil-dependent and -independent mechanism
Source: eLife journal article supplement (doi:10.7554/elife.57274), 2020-07-24
Supplement: supp [file elife-57274-supp-v1.zip › elife_poa_e57274_Supplementary_file_2.xlsx]

## Sheet: Antibody list
Antibody	Catalog number	Dilution	Company
Mouse anti-STAT3	610189	1:1000	BD Biosciences
Rabbit anti-p-STAT3 (Y705)	9131	1:1000	Cell Signaling
Goat anti-CTSD	Sc-6486	1:1000	Santa Cruz Biotechnology
Goat anti-CTSB	Sc-6493	1:1000	Santa Cruz Biotechnology
Rat anti-CTSL	MAB9521	1:1000	RnD Systems
Rabbit anti-PARP	9542	1:1000	Cell Signaling
Mouse anti-p53 (Ab-6)	OP43	1:1000	Calbiochem
Mouse anti-GAPDH	AM4300	1:10000	Ambion
Rabbit anti-LAMP2	ADI-905-723-100	1:1000	Enzo Life Sciences
Mouse anti-β-tubulin	M2008	1:10000	SABio
Anti-rabbit IgG, HRP-linked Antibody	7074	1:2000	Cell Signaling
Rabbit anti-Cleaved caspase 3	9661	1:100	Cell Signaling
Rabbit anti-Perilipin	3470	1:100	Cell Signaling
Anti-mouse IgG, HRP-linked Antibody	7076	1:2000	Cell Signaling
rabbit anti-goat IgG-HRP	sc-2768	1:5000	Santa Cruz Biotechnology
